# Supplementary material
Source: bioRxiv or medRxiv preprint supplement (https://www.biorxiv.org/highwire/filestream/93543/field_highwire_adjunct_files/3/304220-4.pdf)

# ABCG2

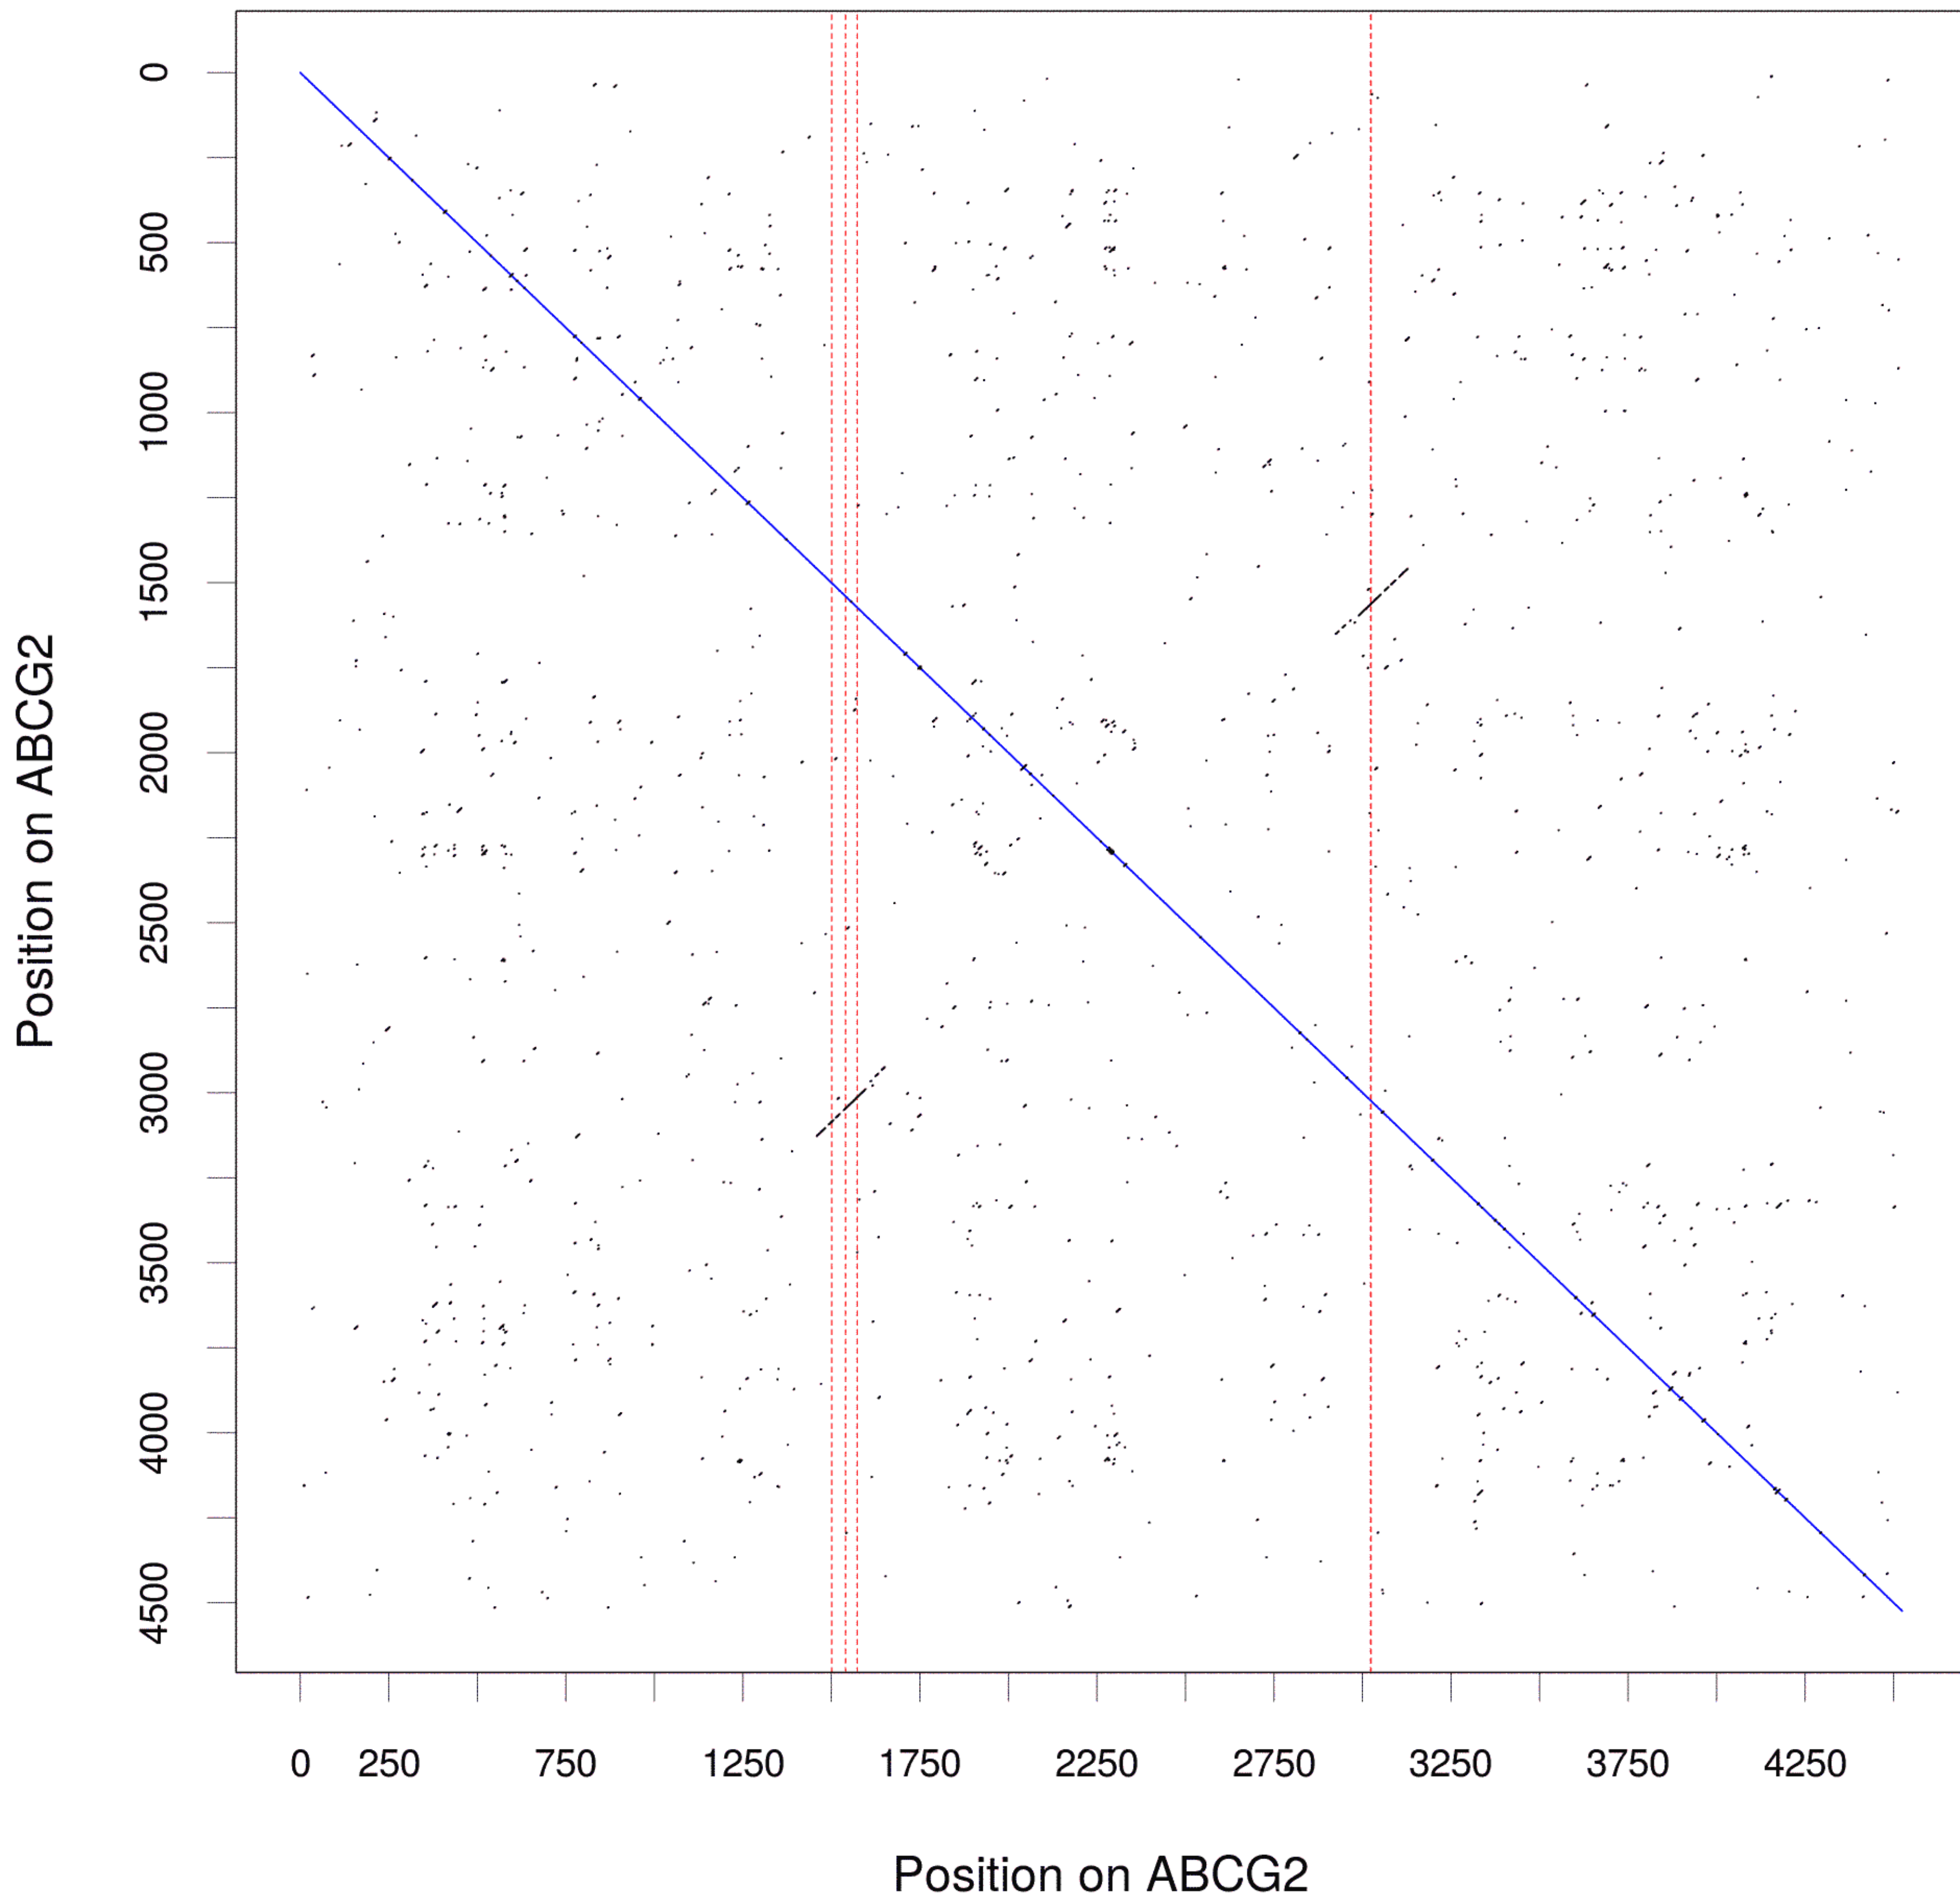

# ABO

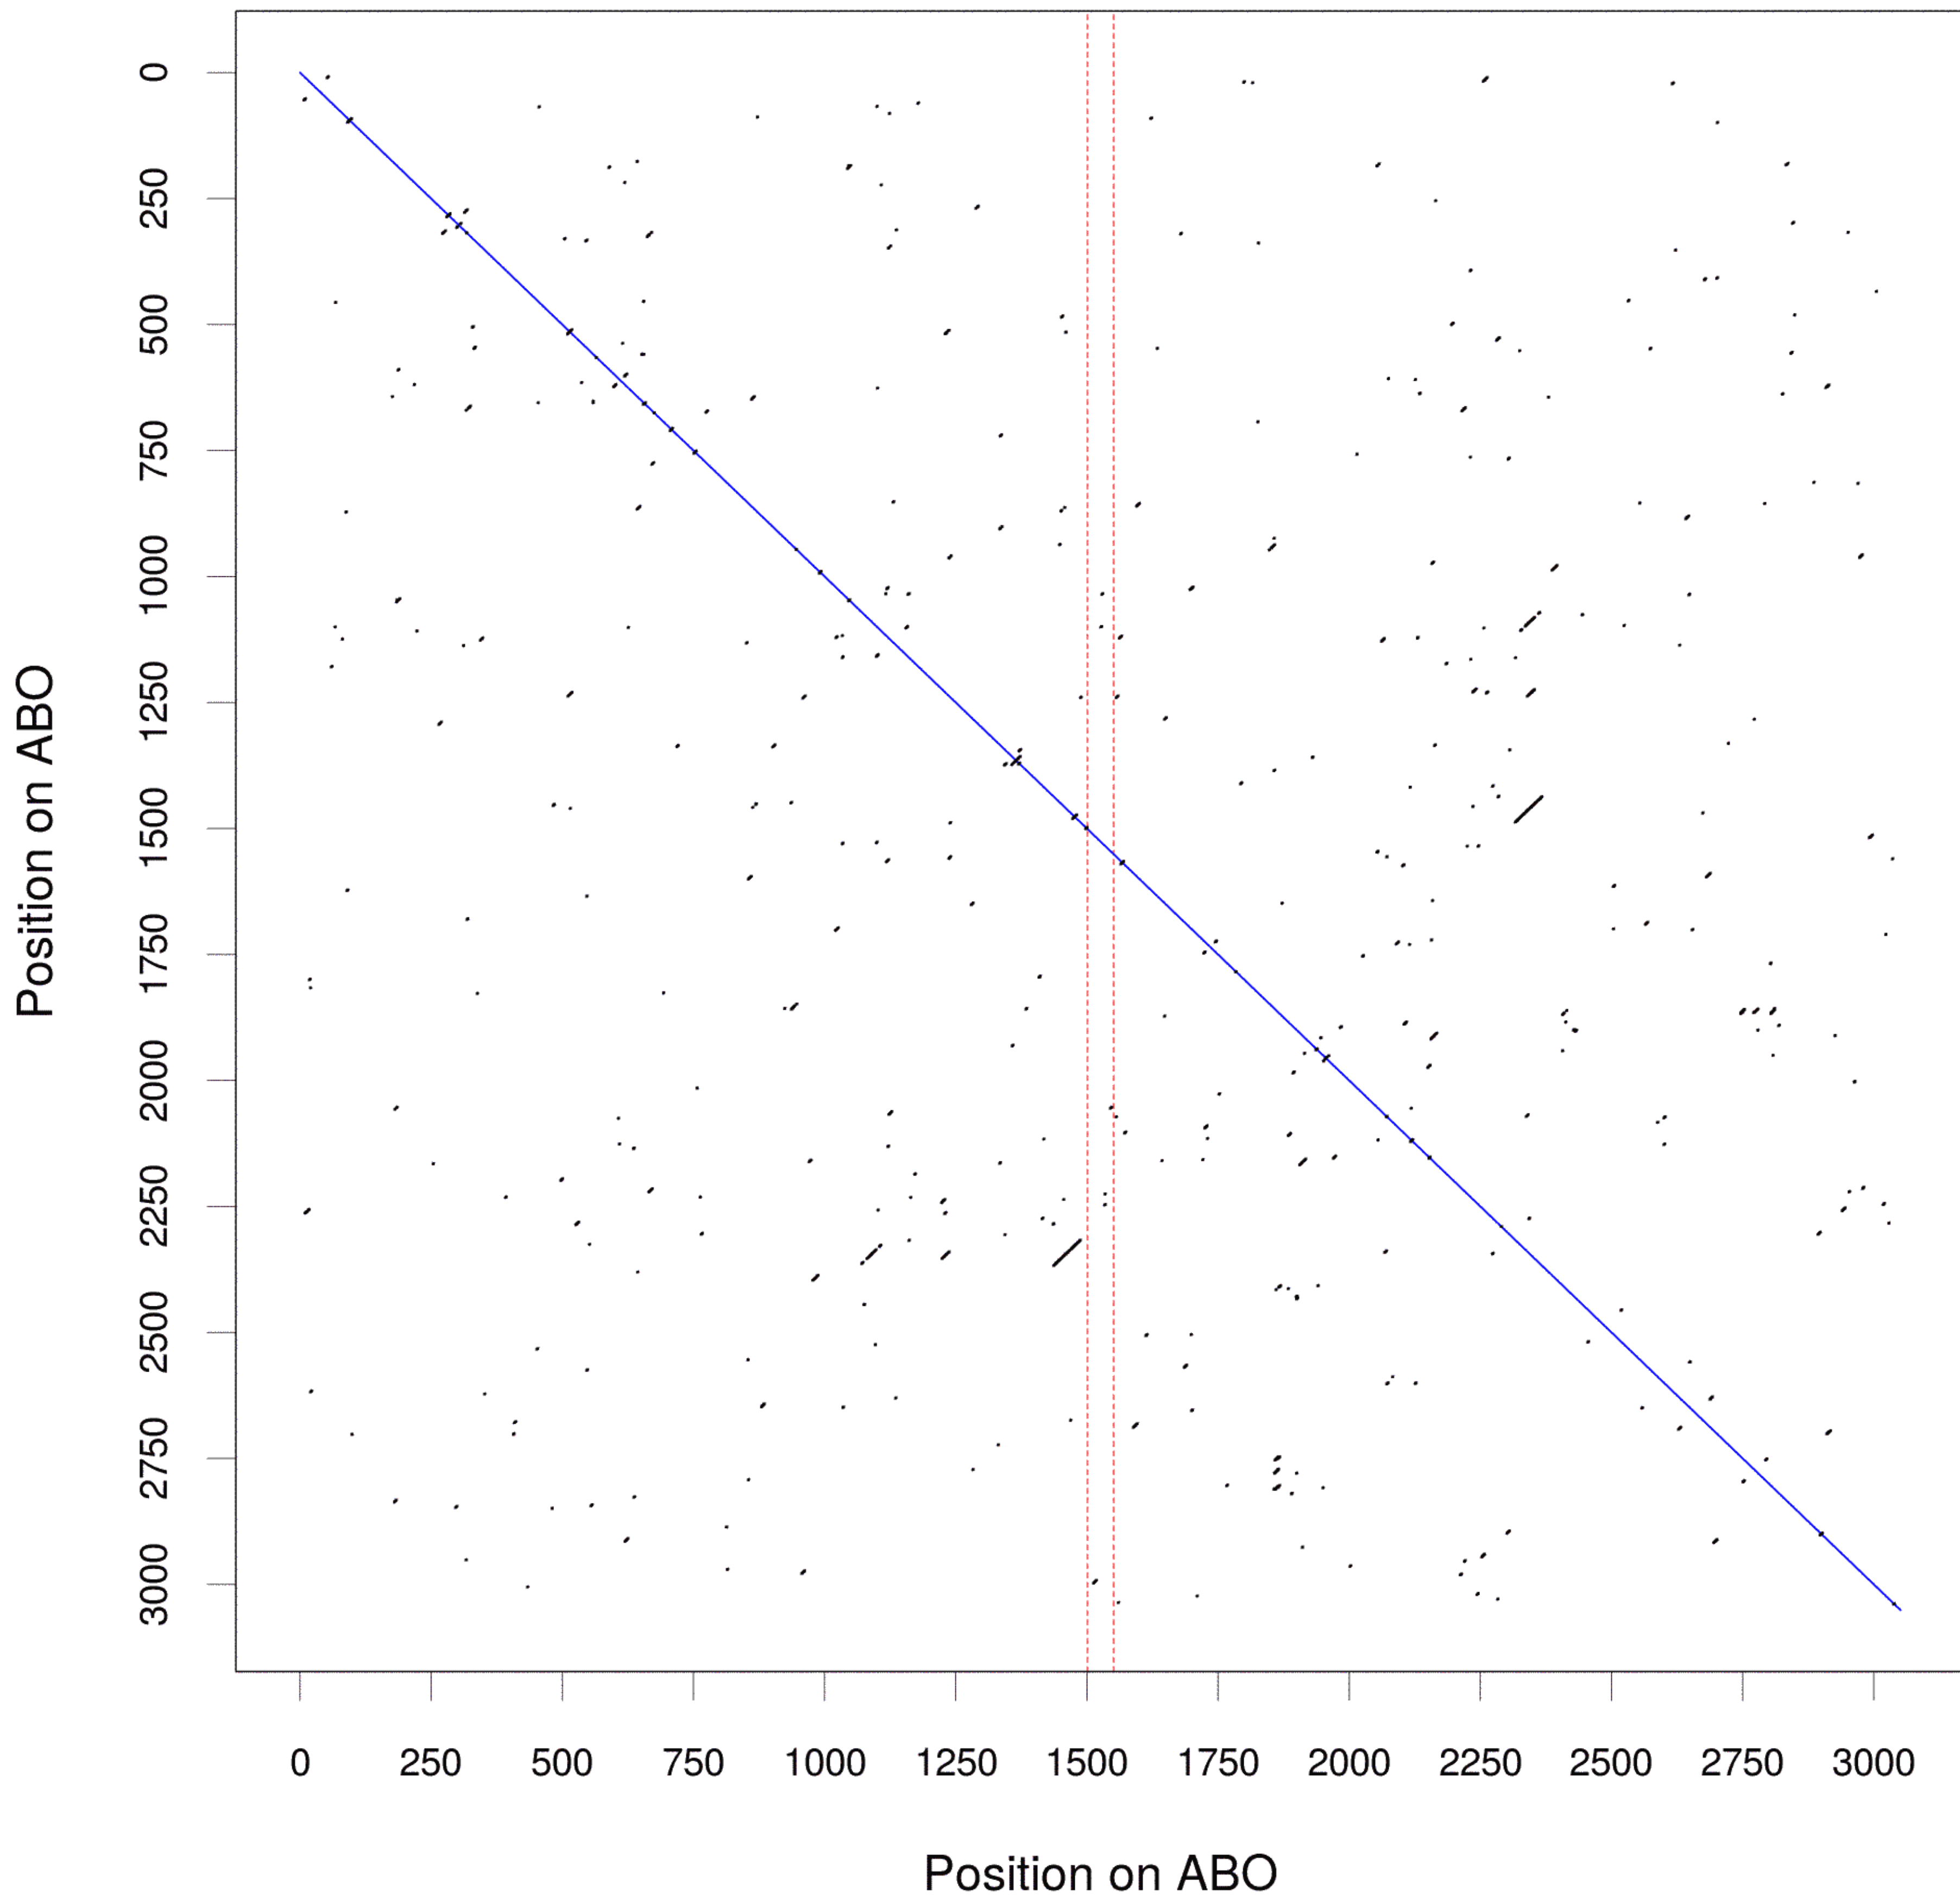

# ACACA

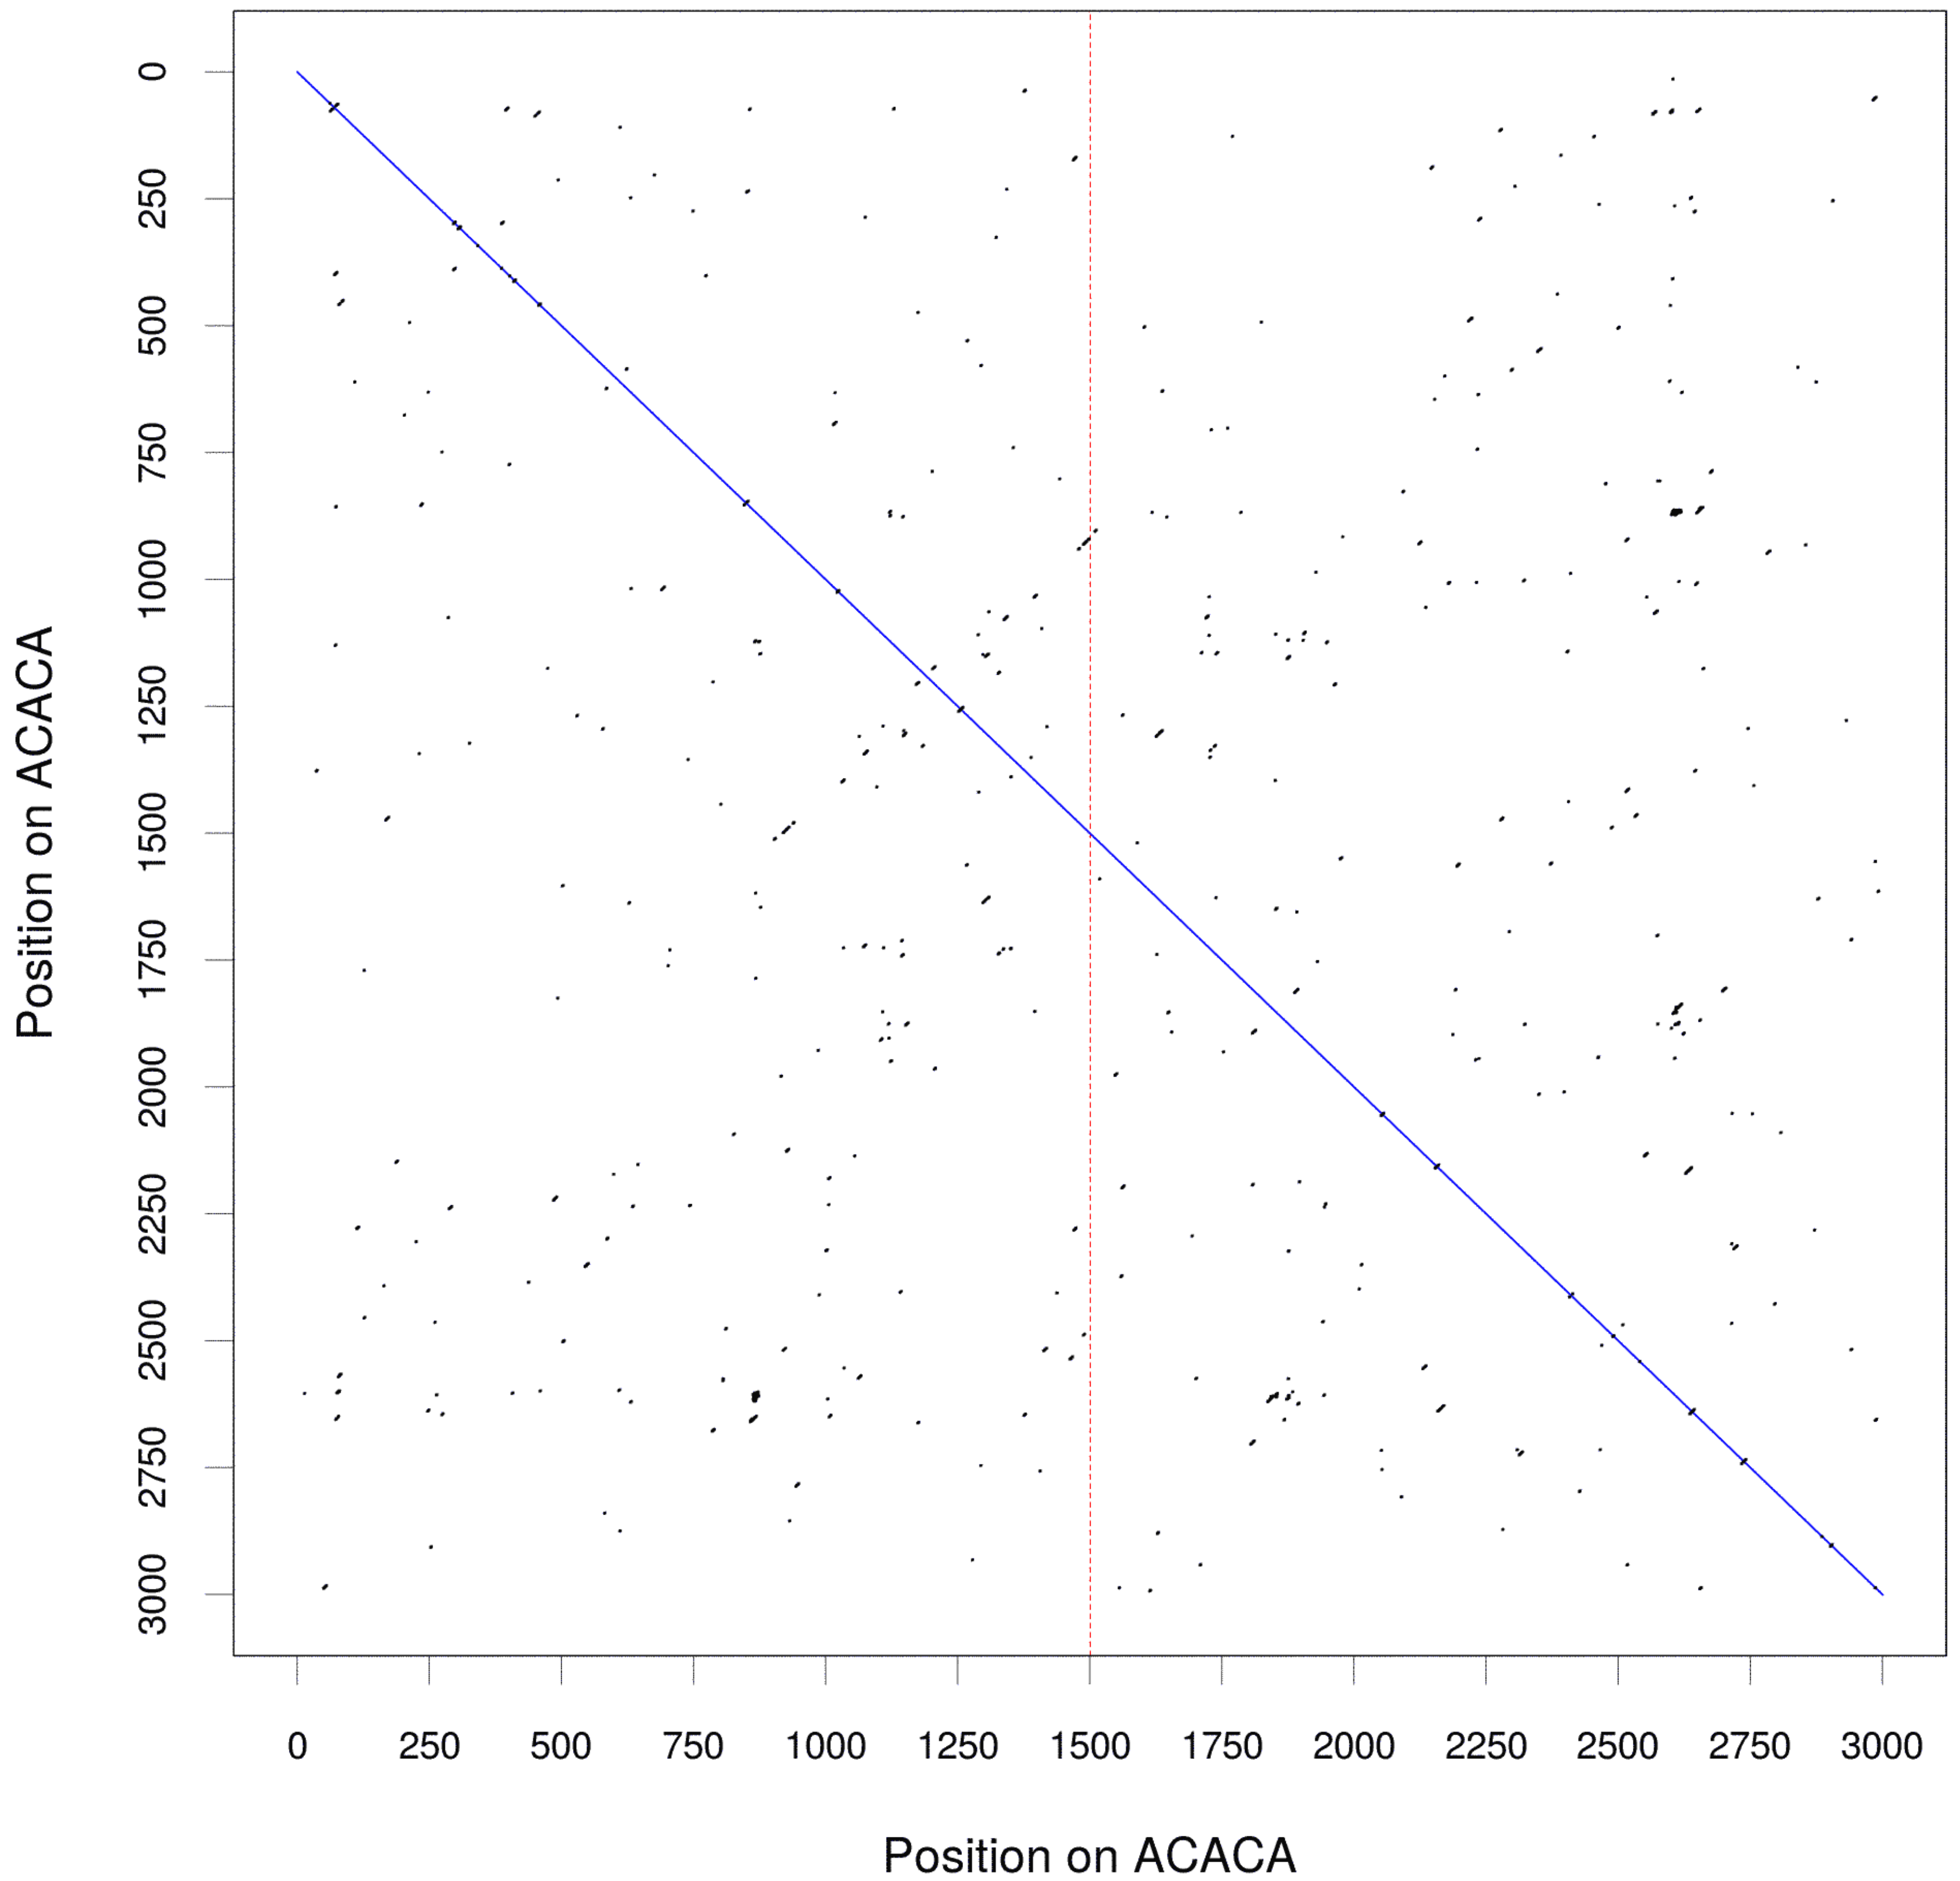

# ACADM

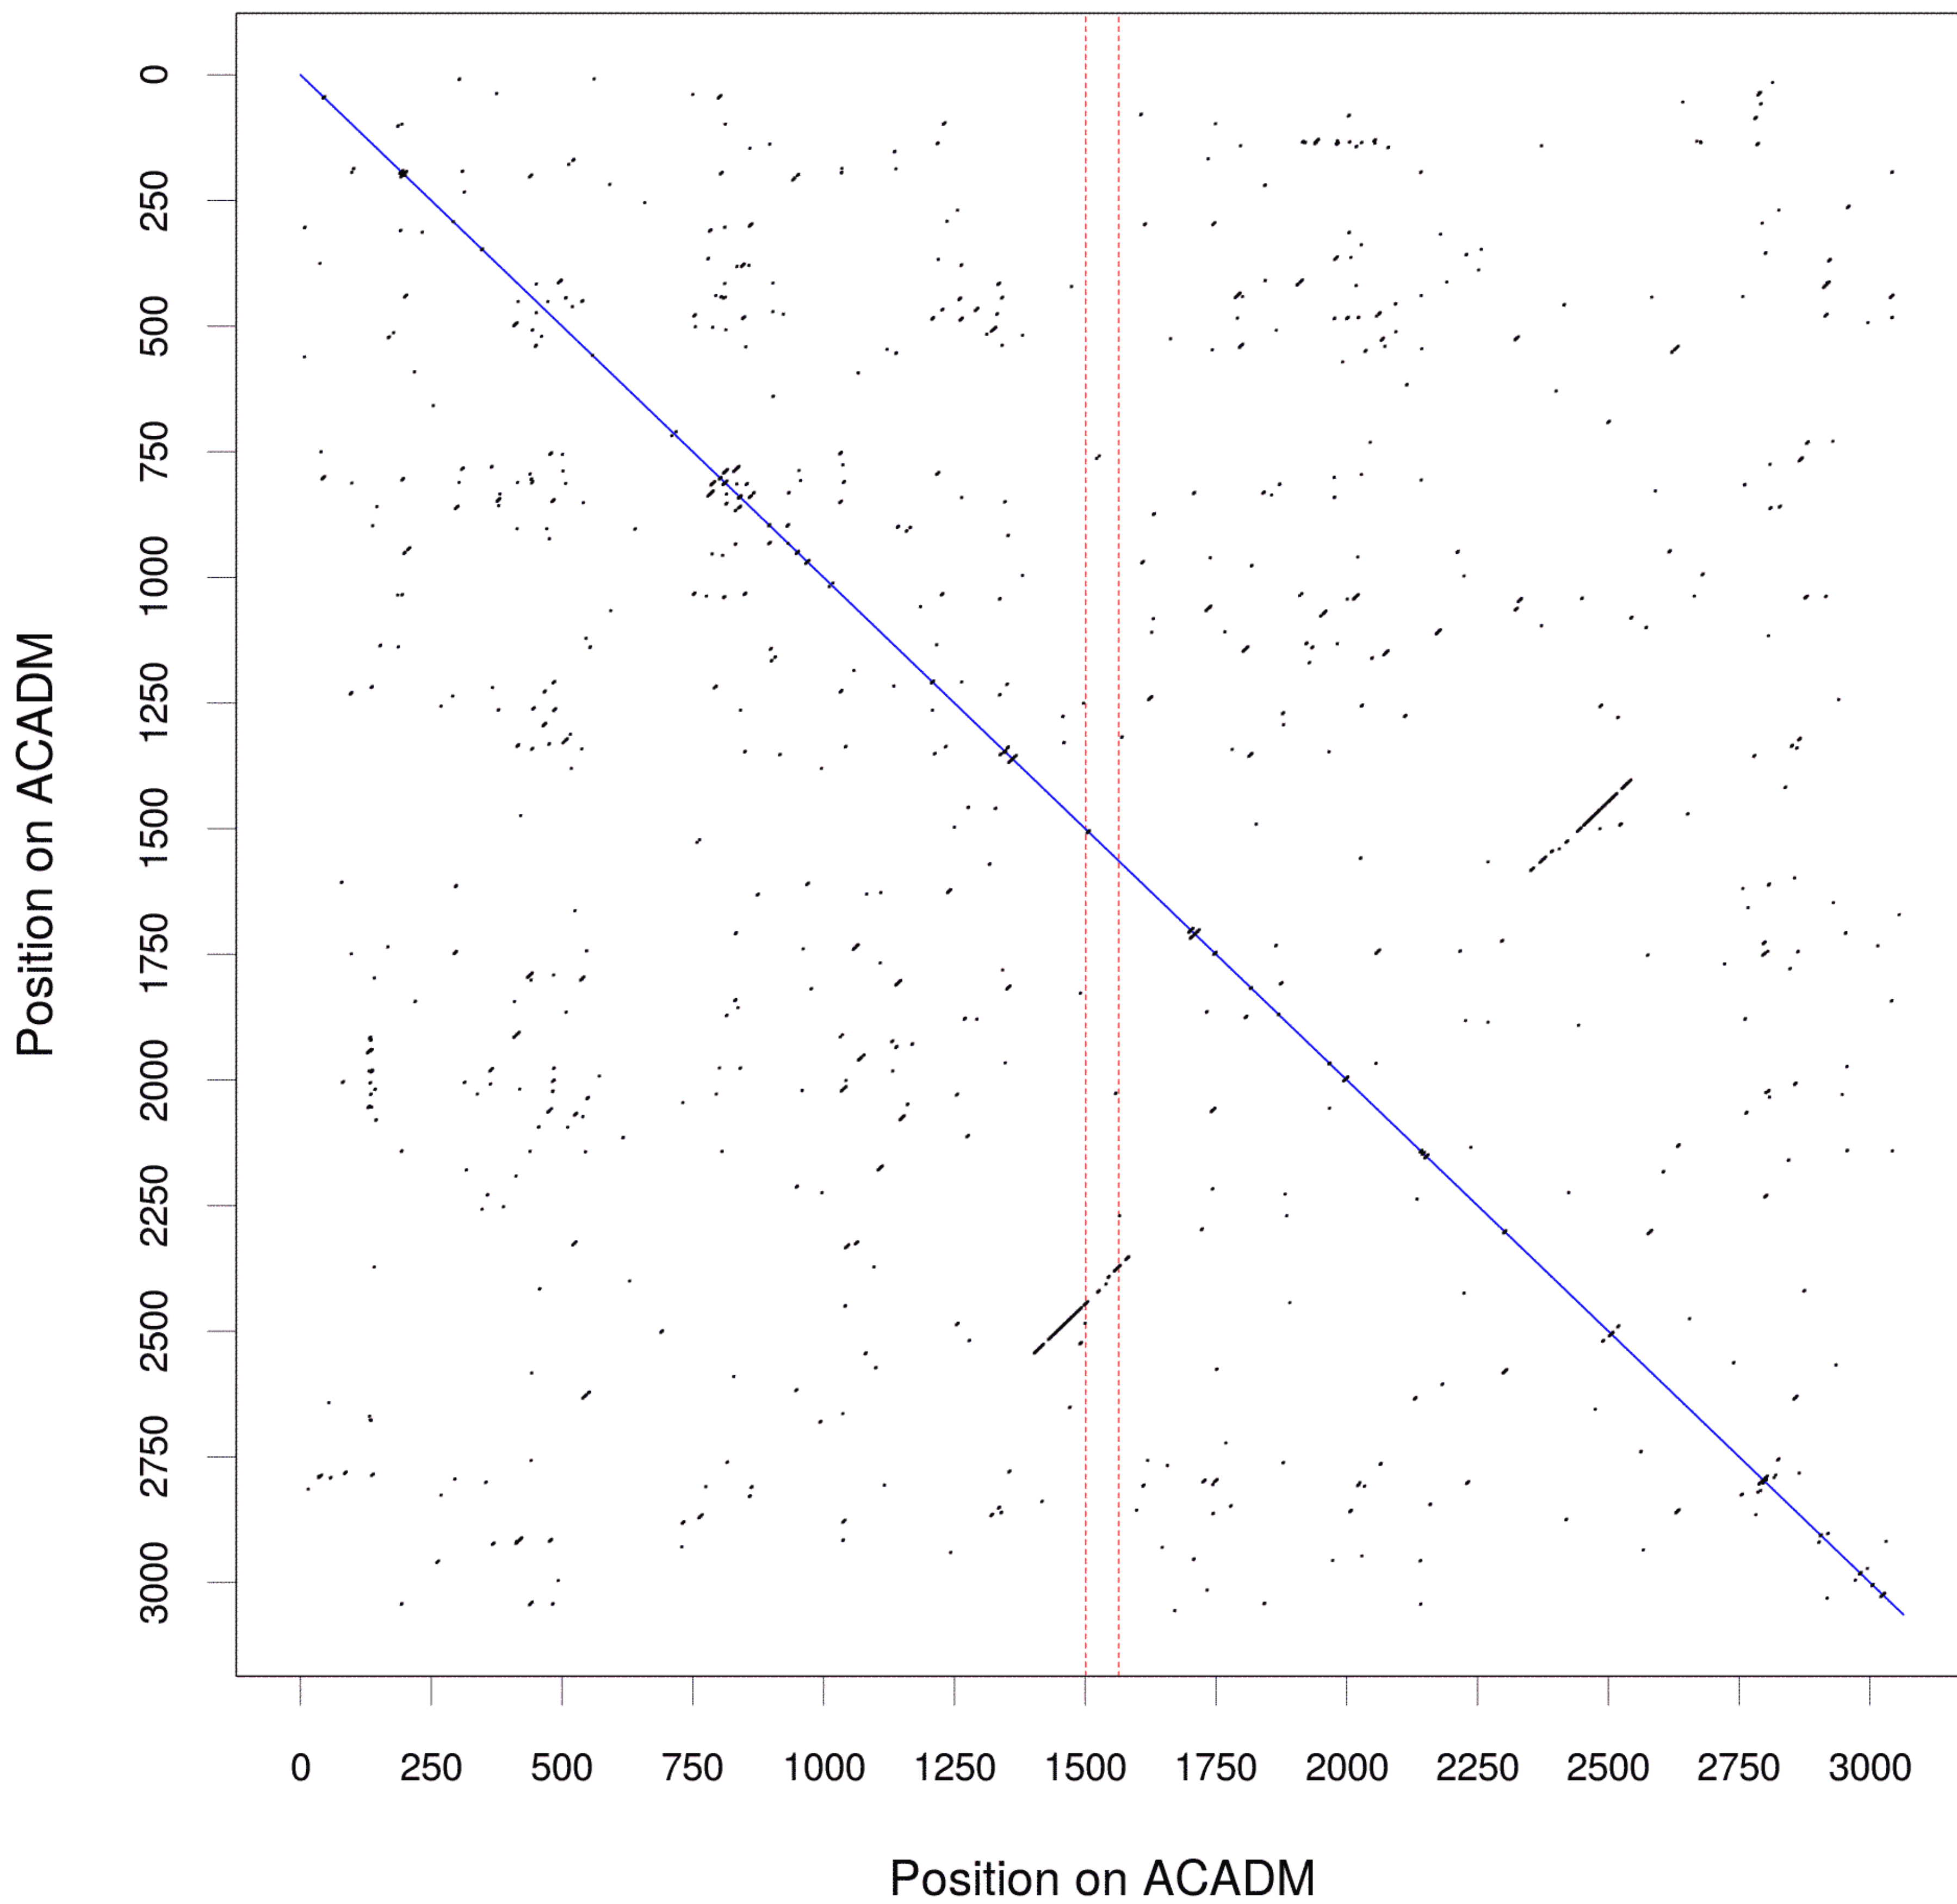

# ACTR3B

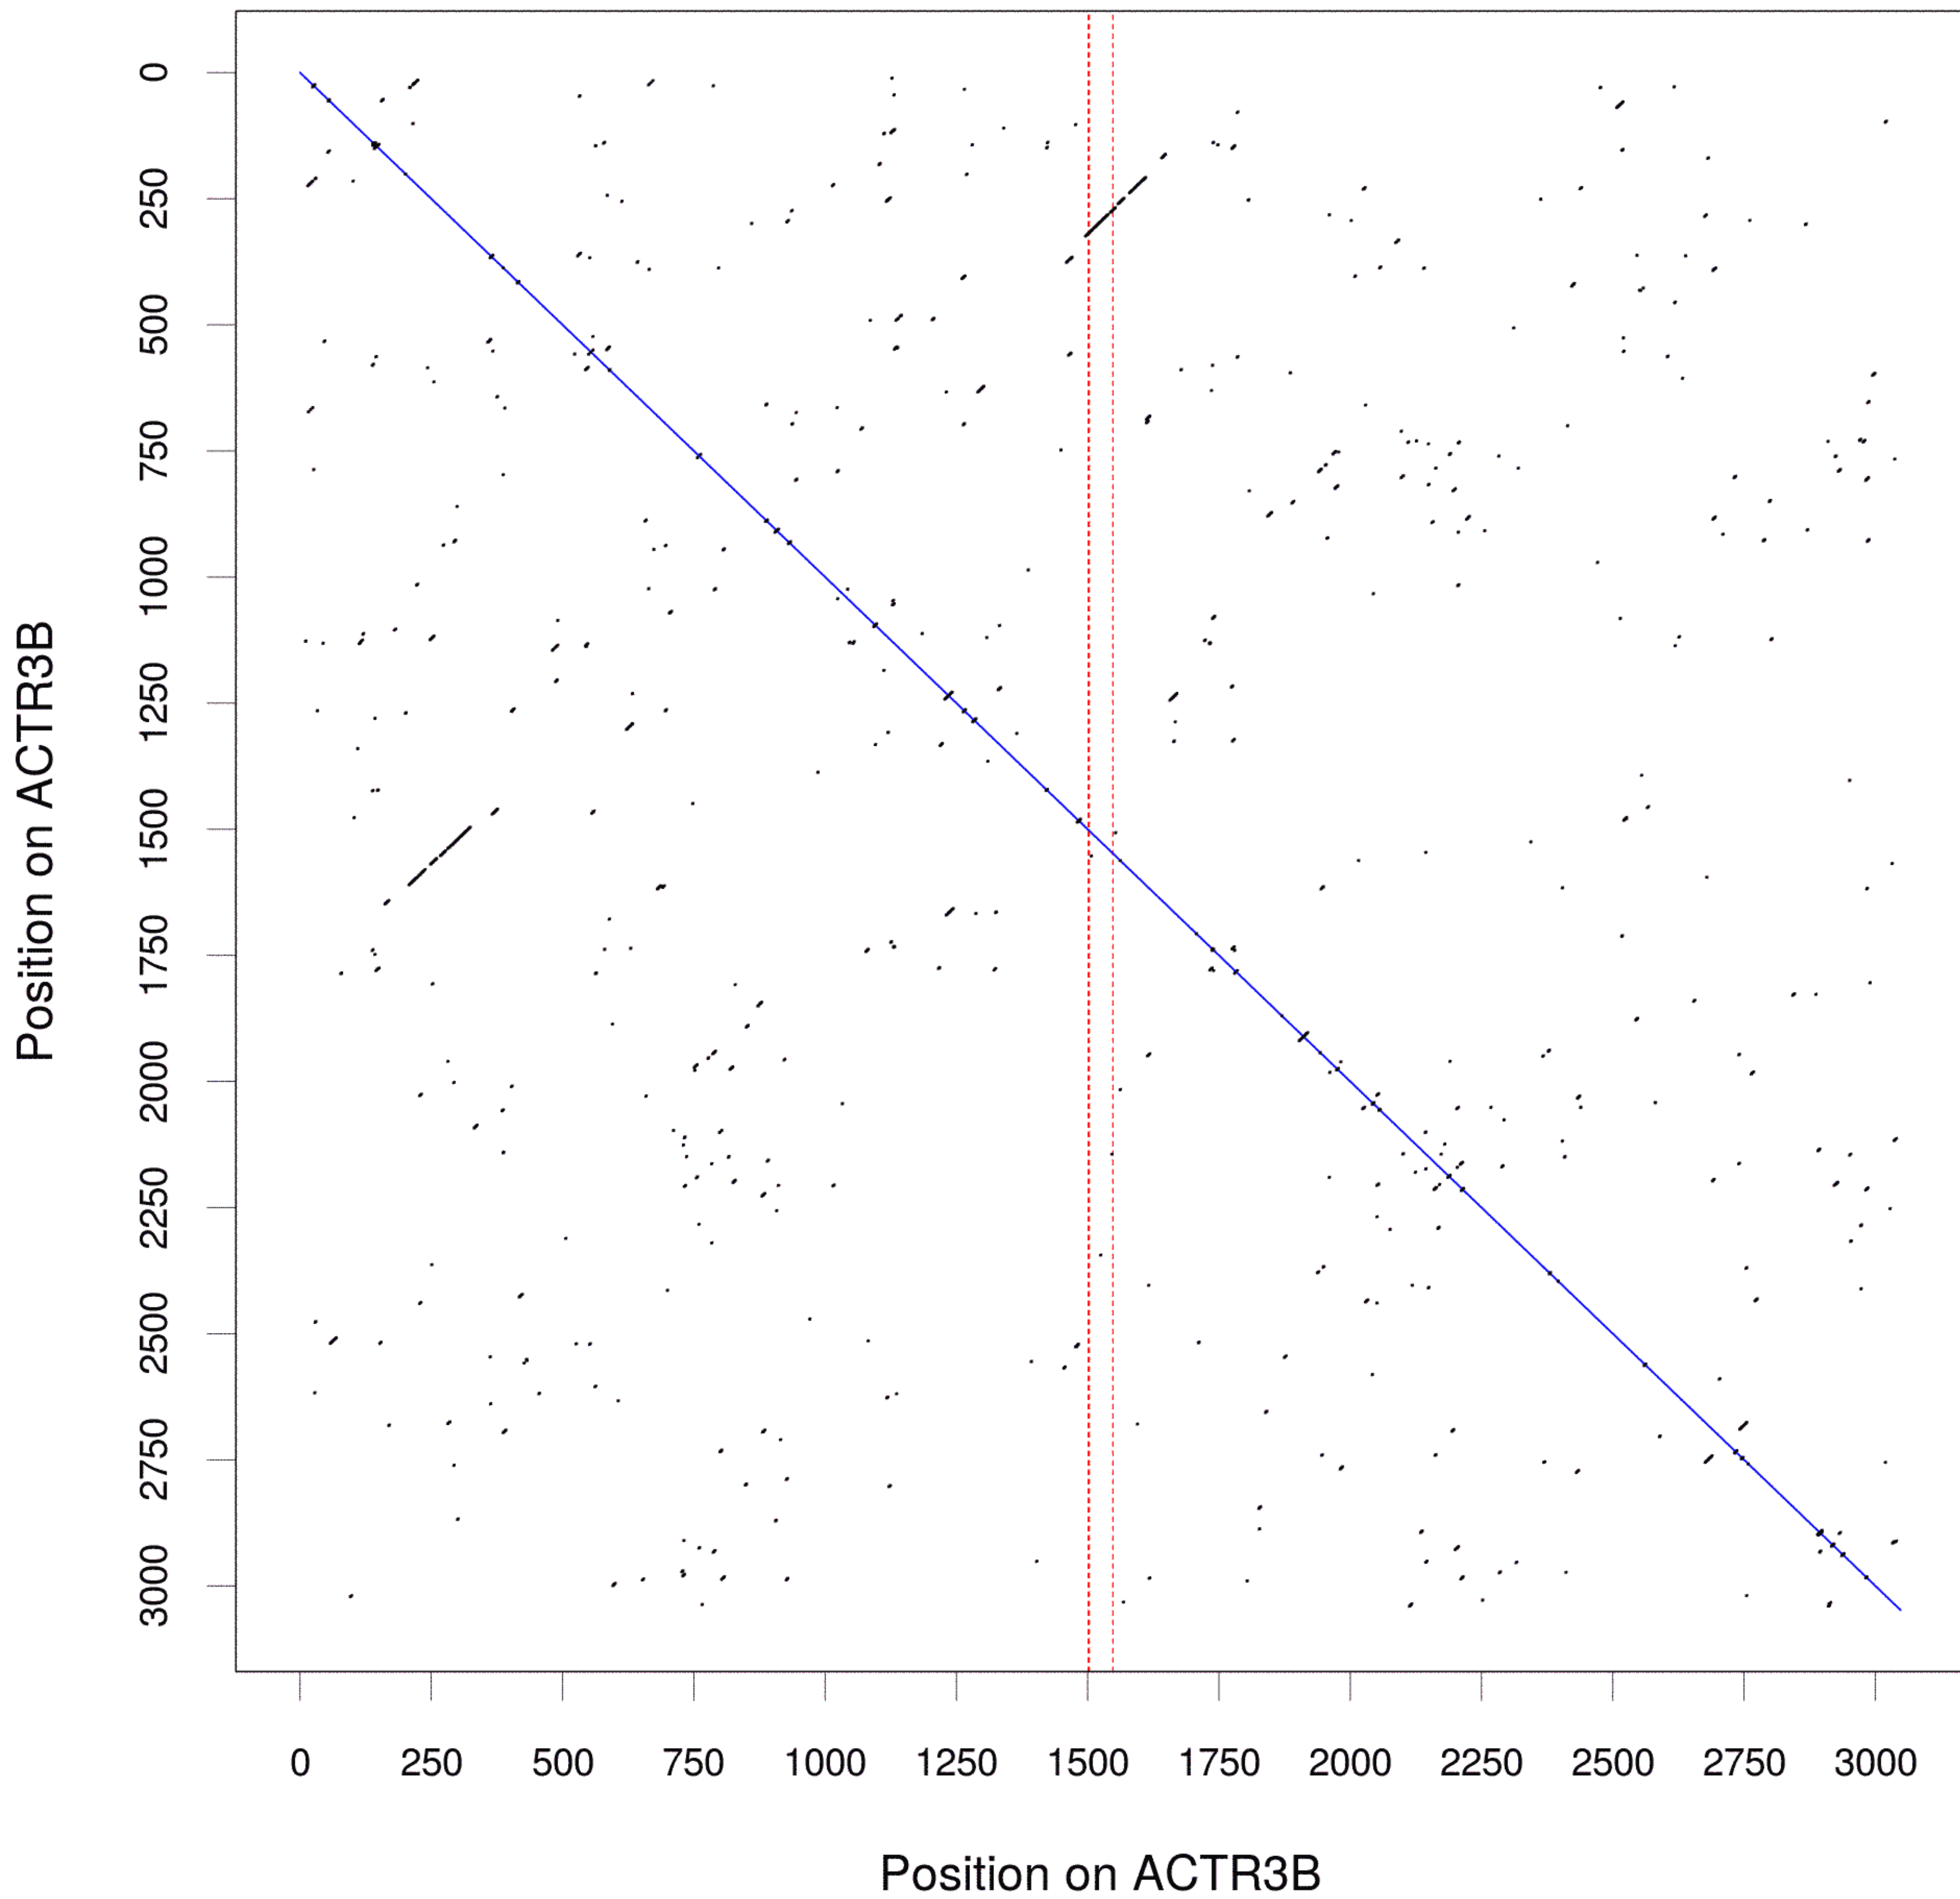

# AJUBA

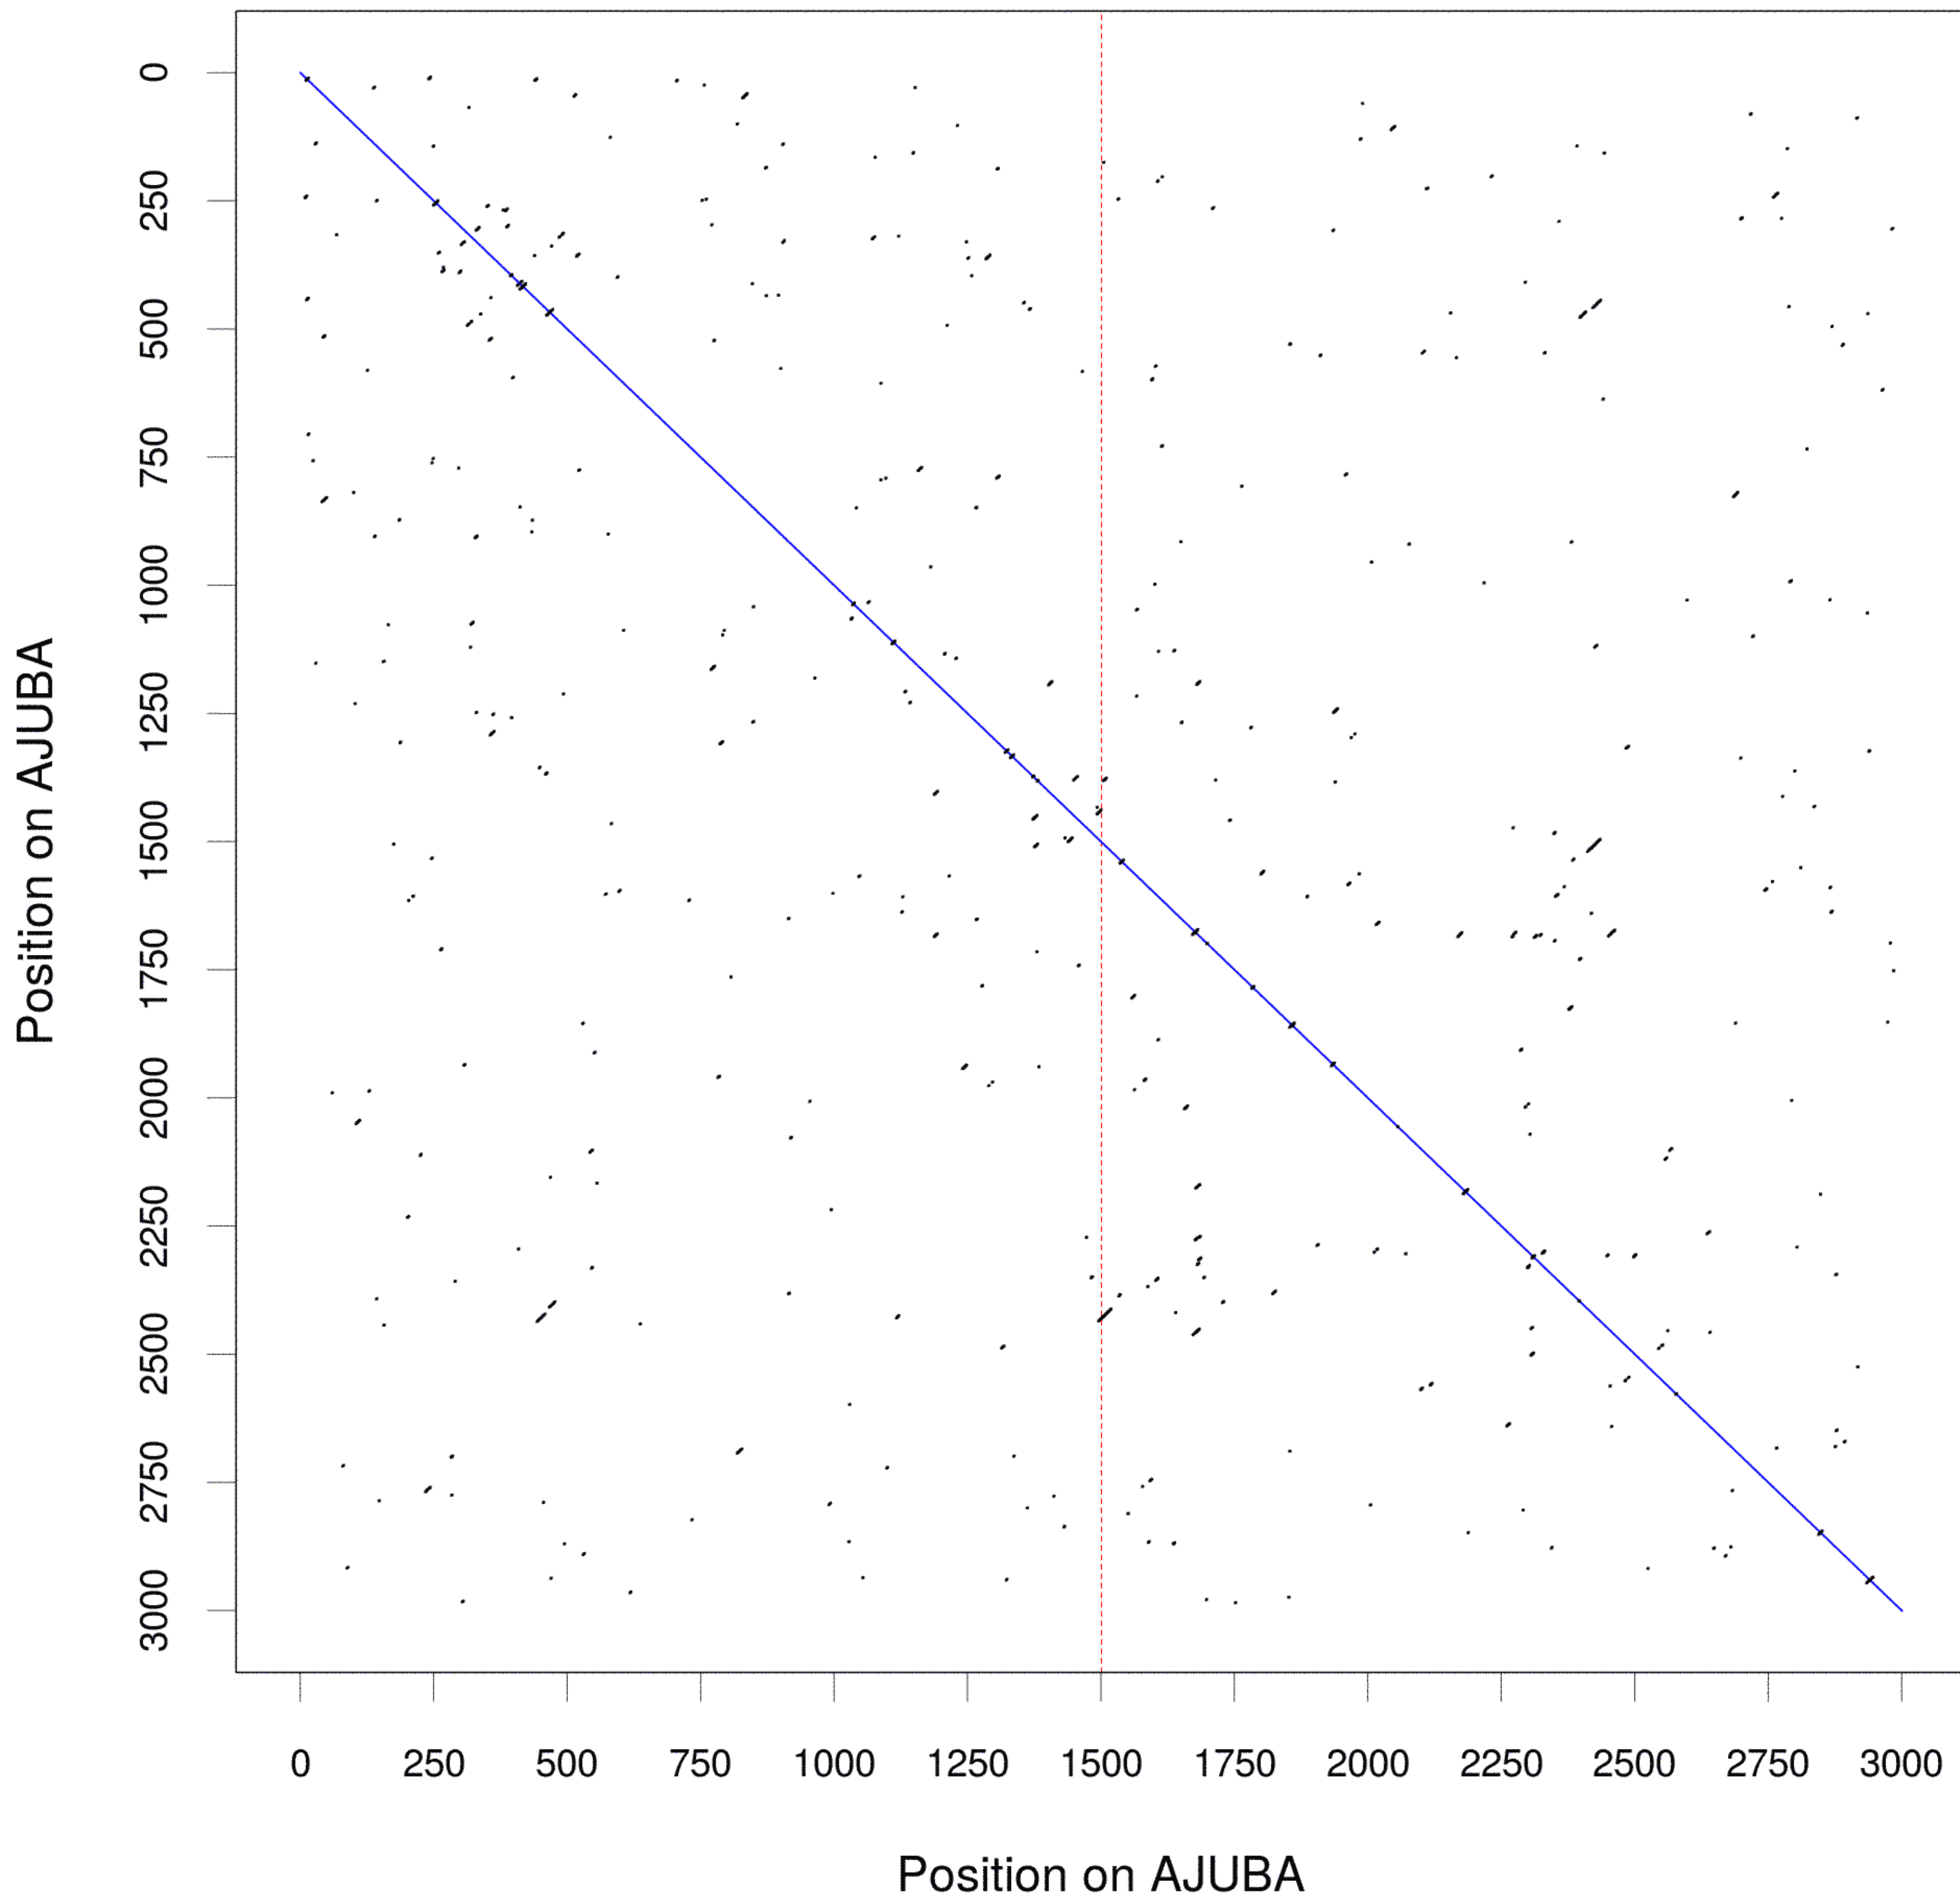

# AKAP8L

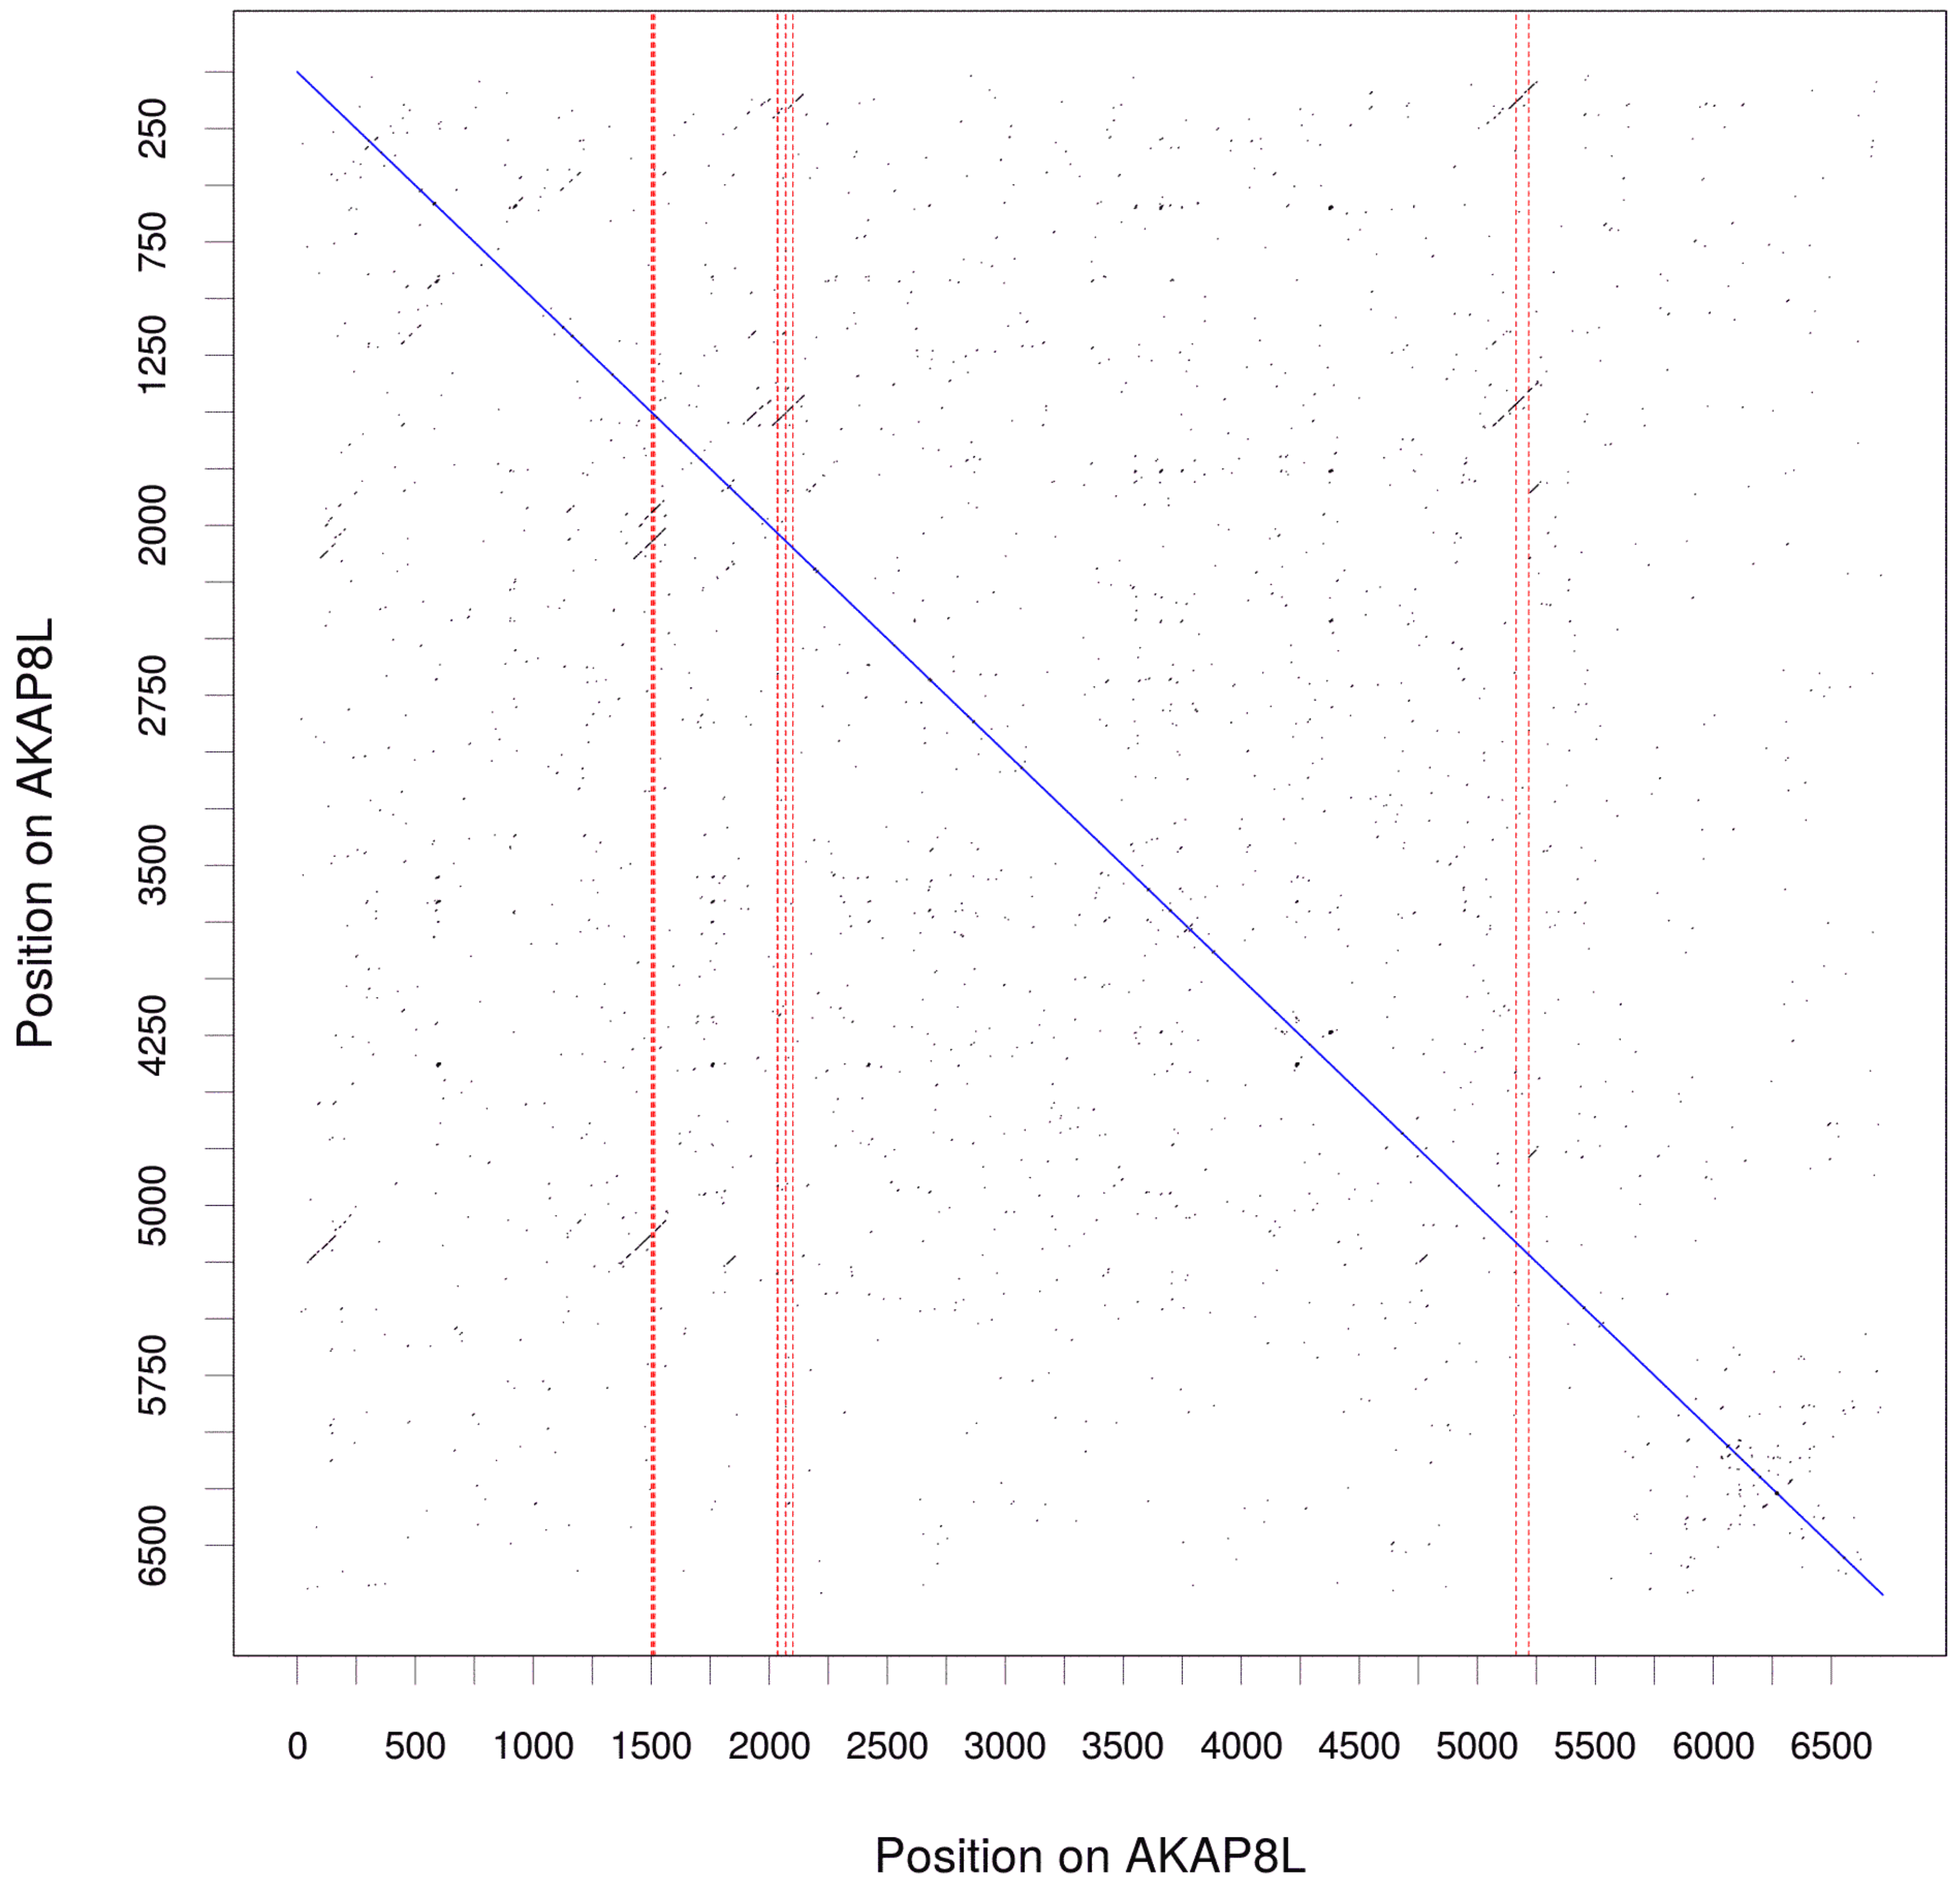

# AKAP13

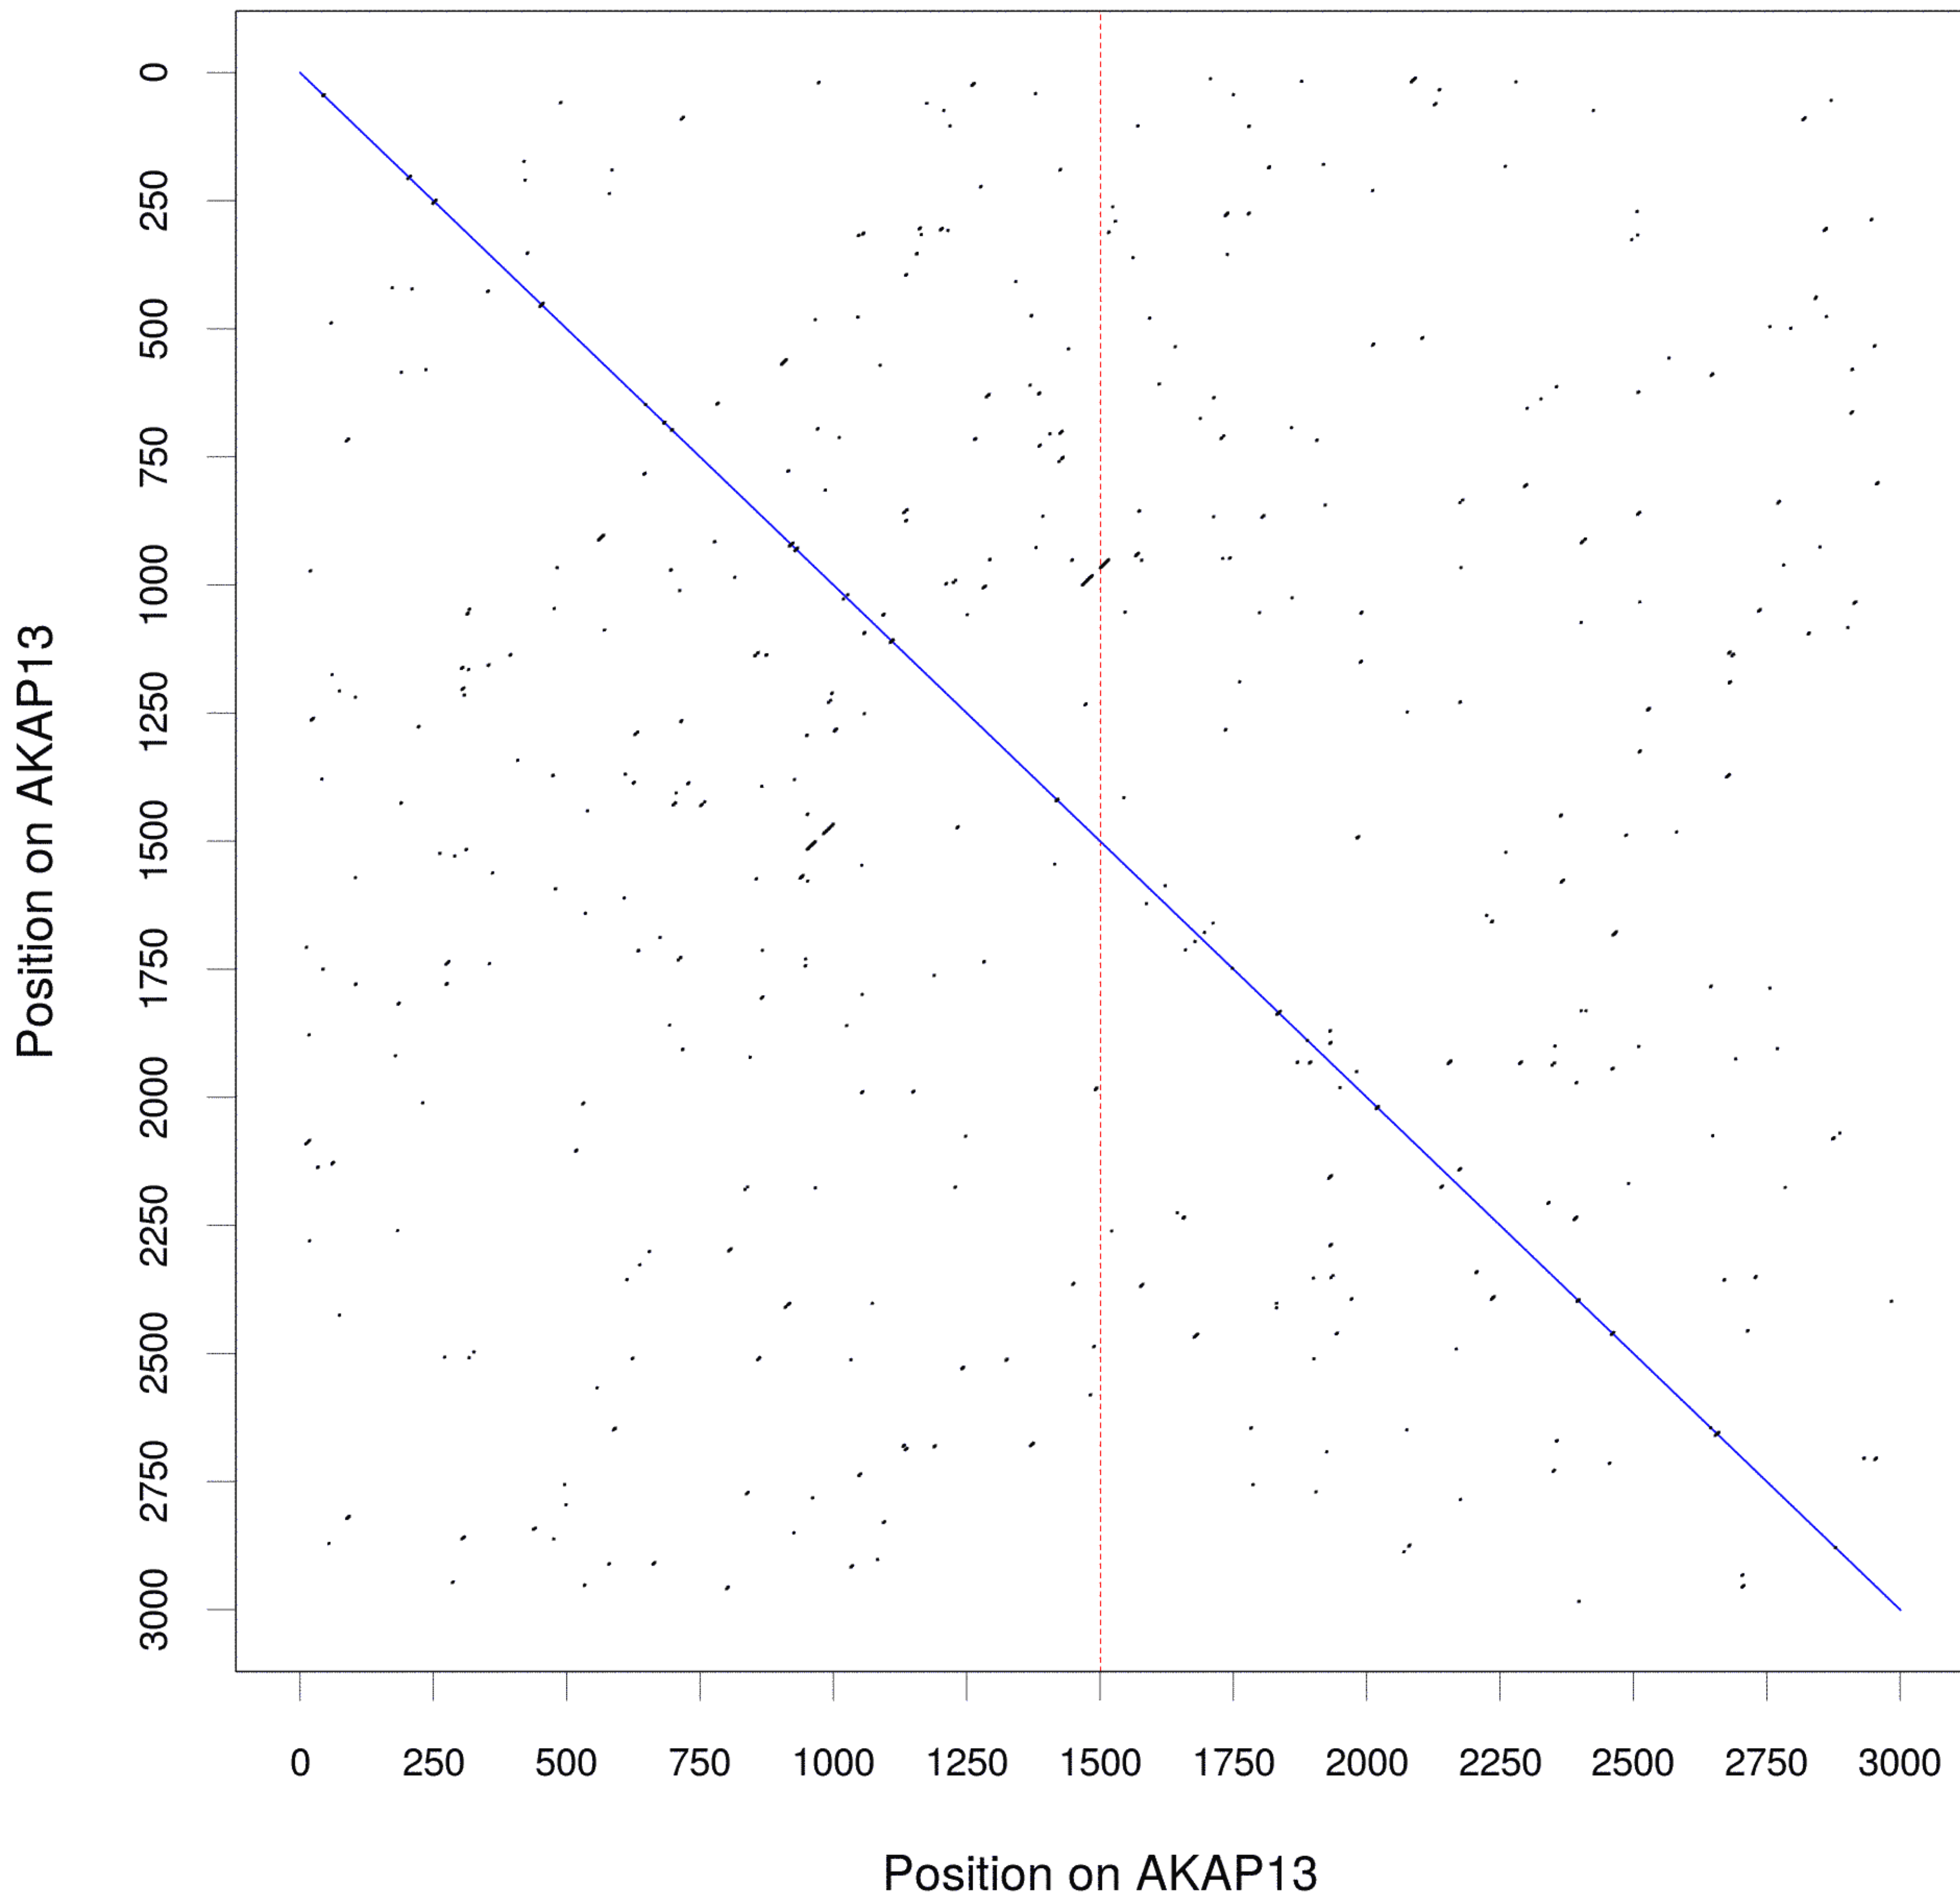



# ALDH9A1

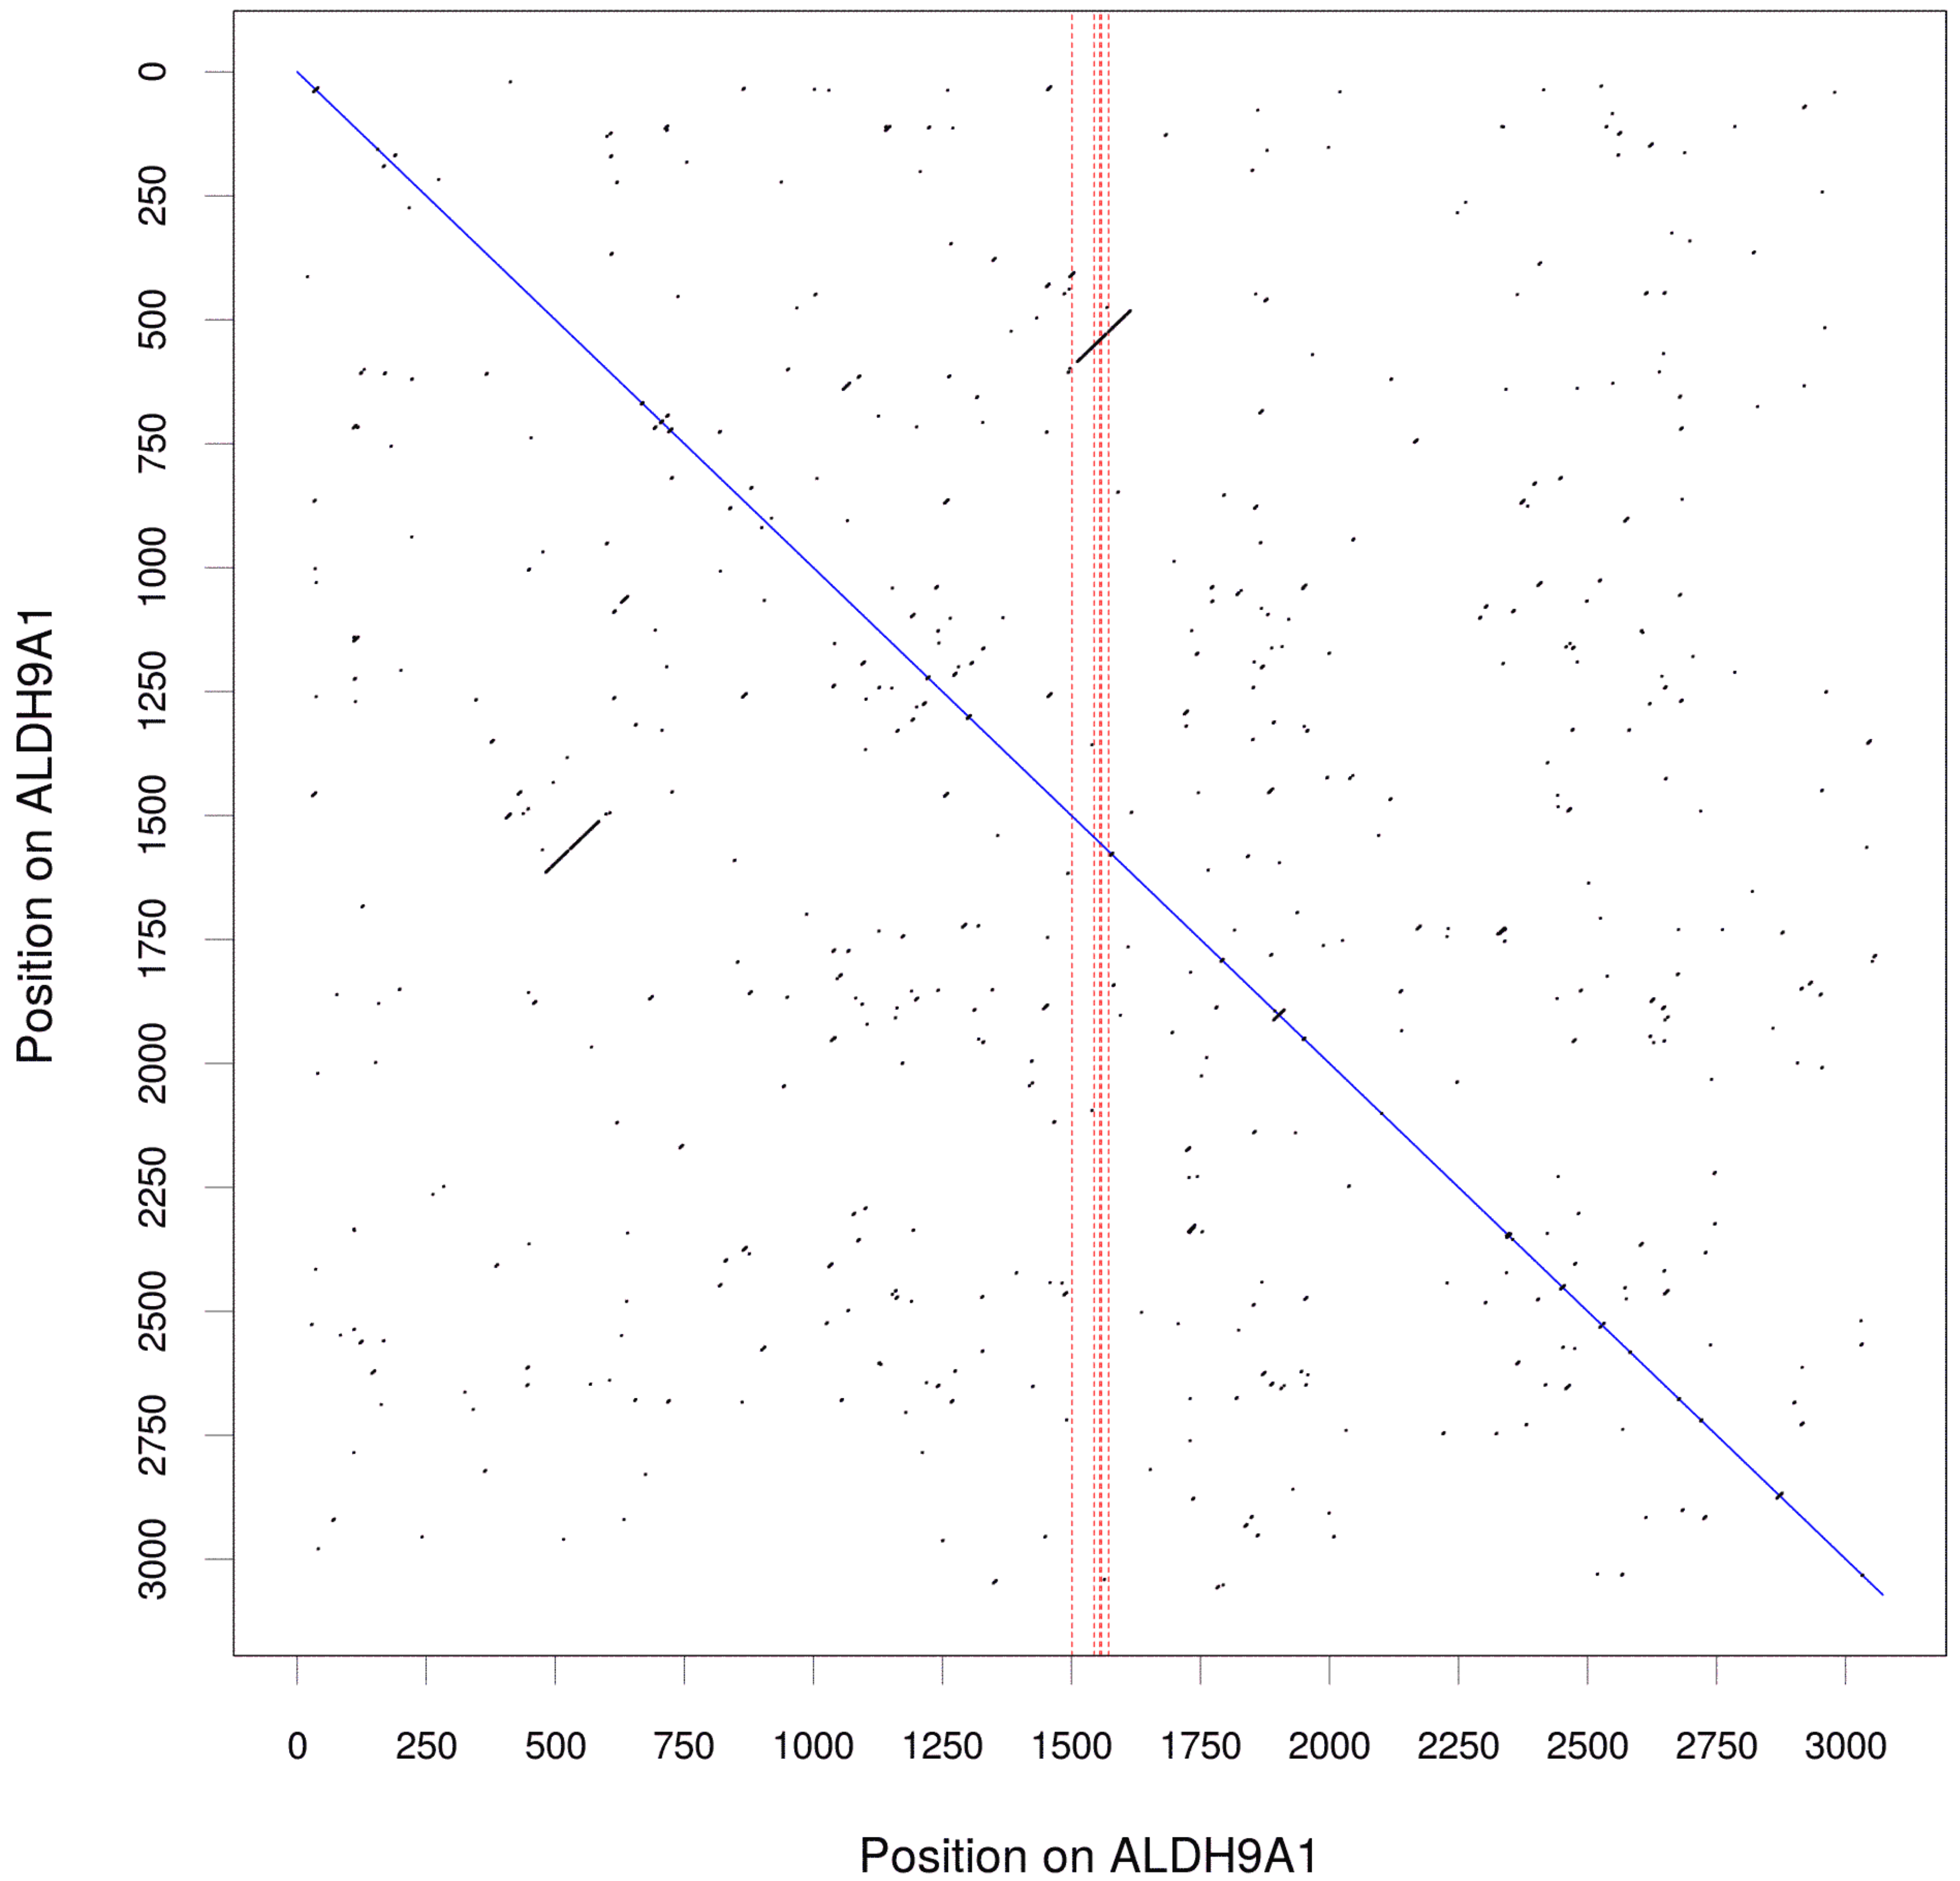

# ALKBH1

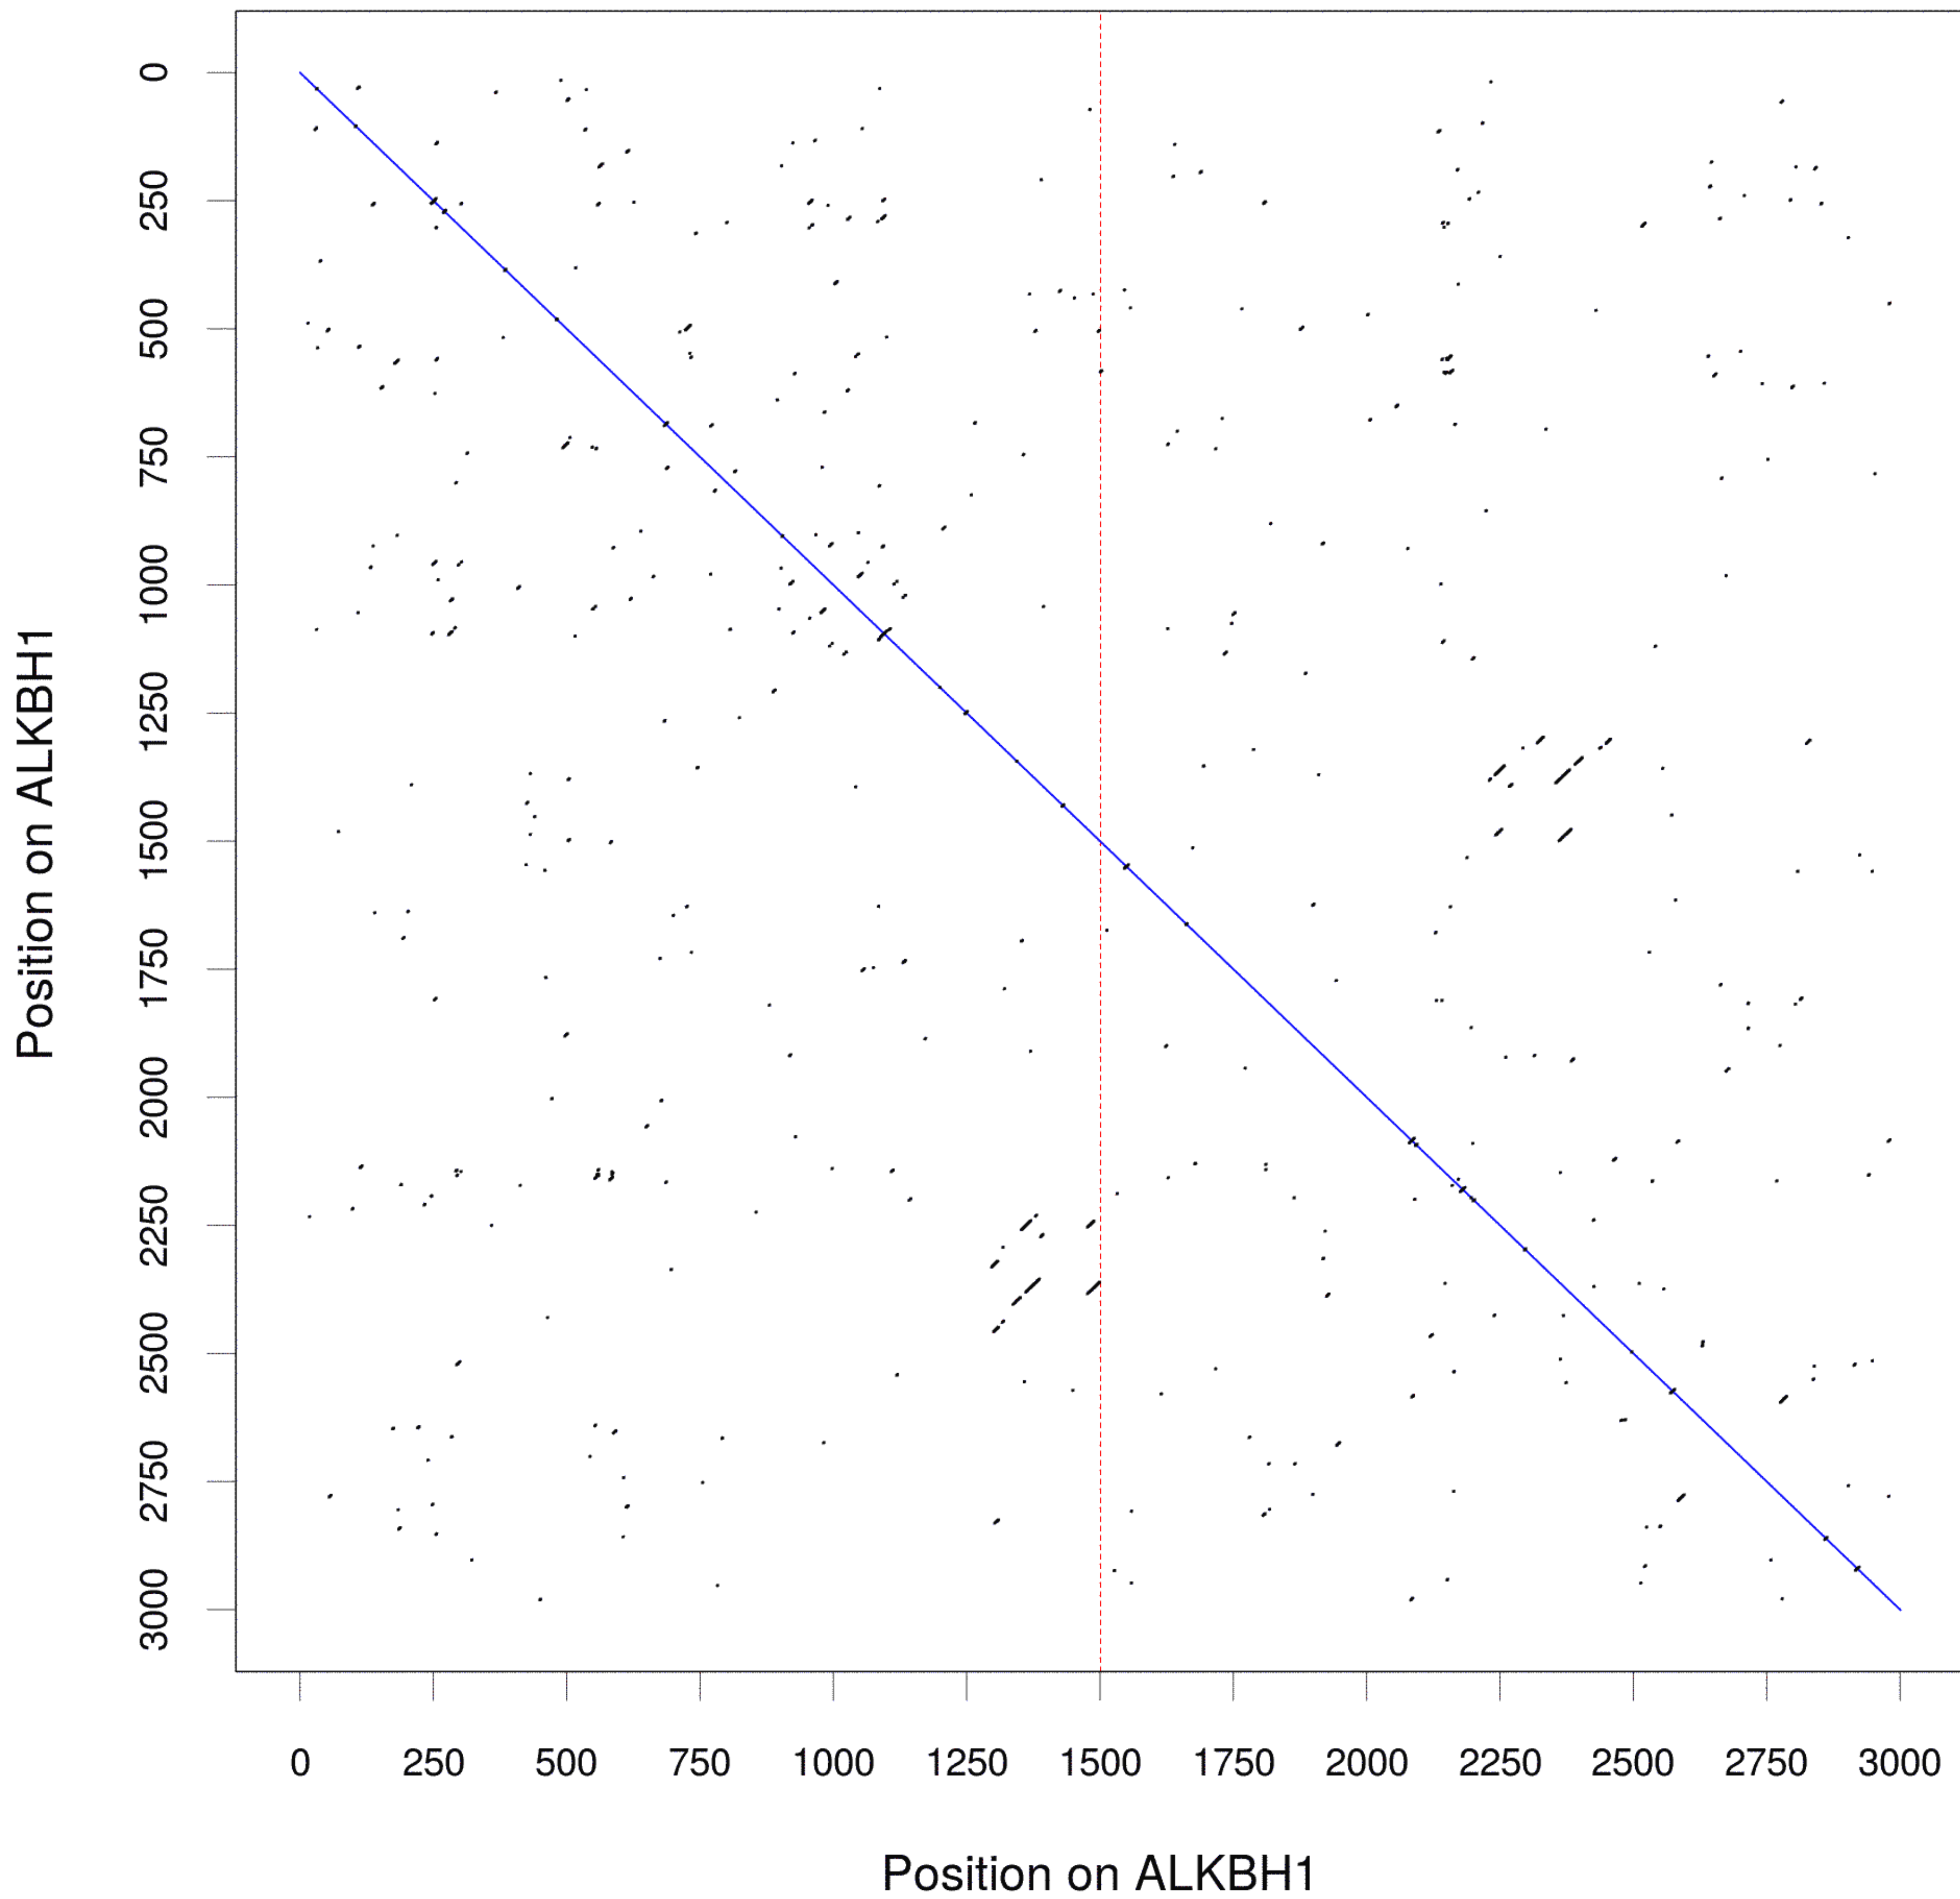

# ARAP1

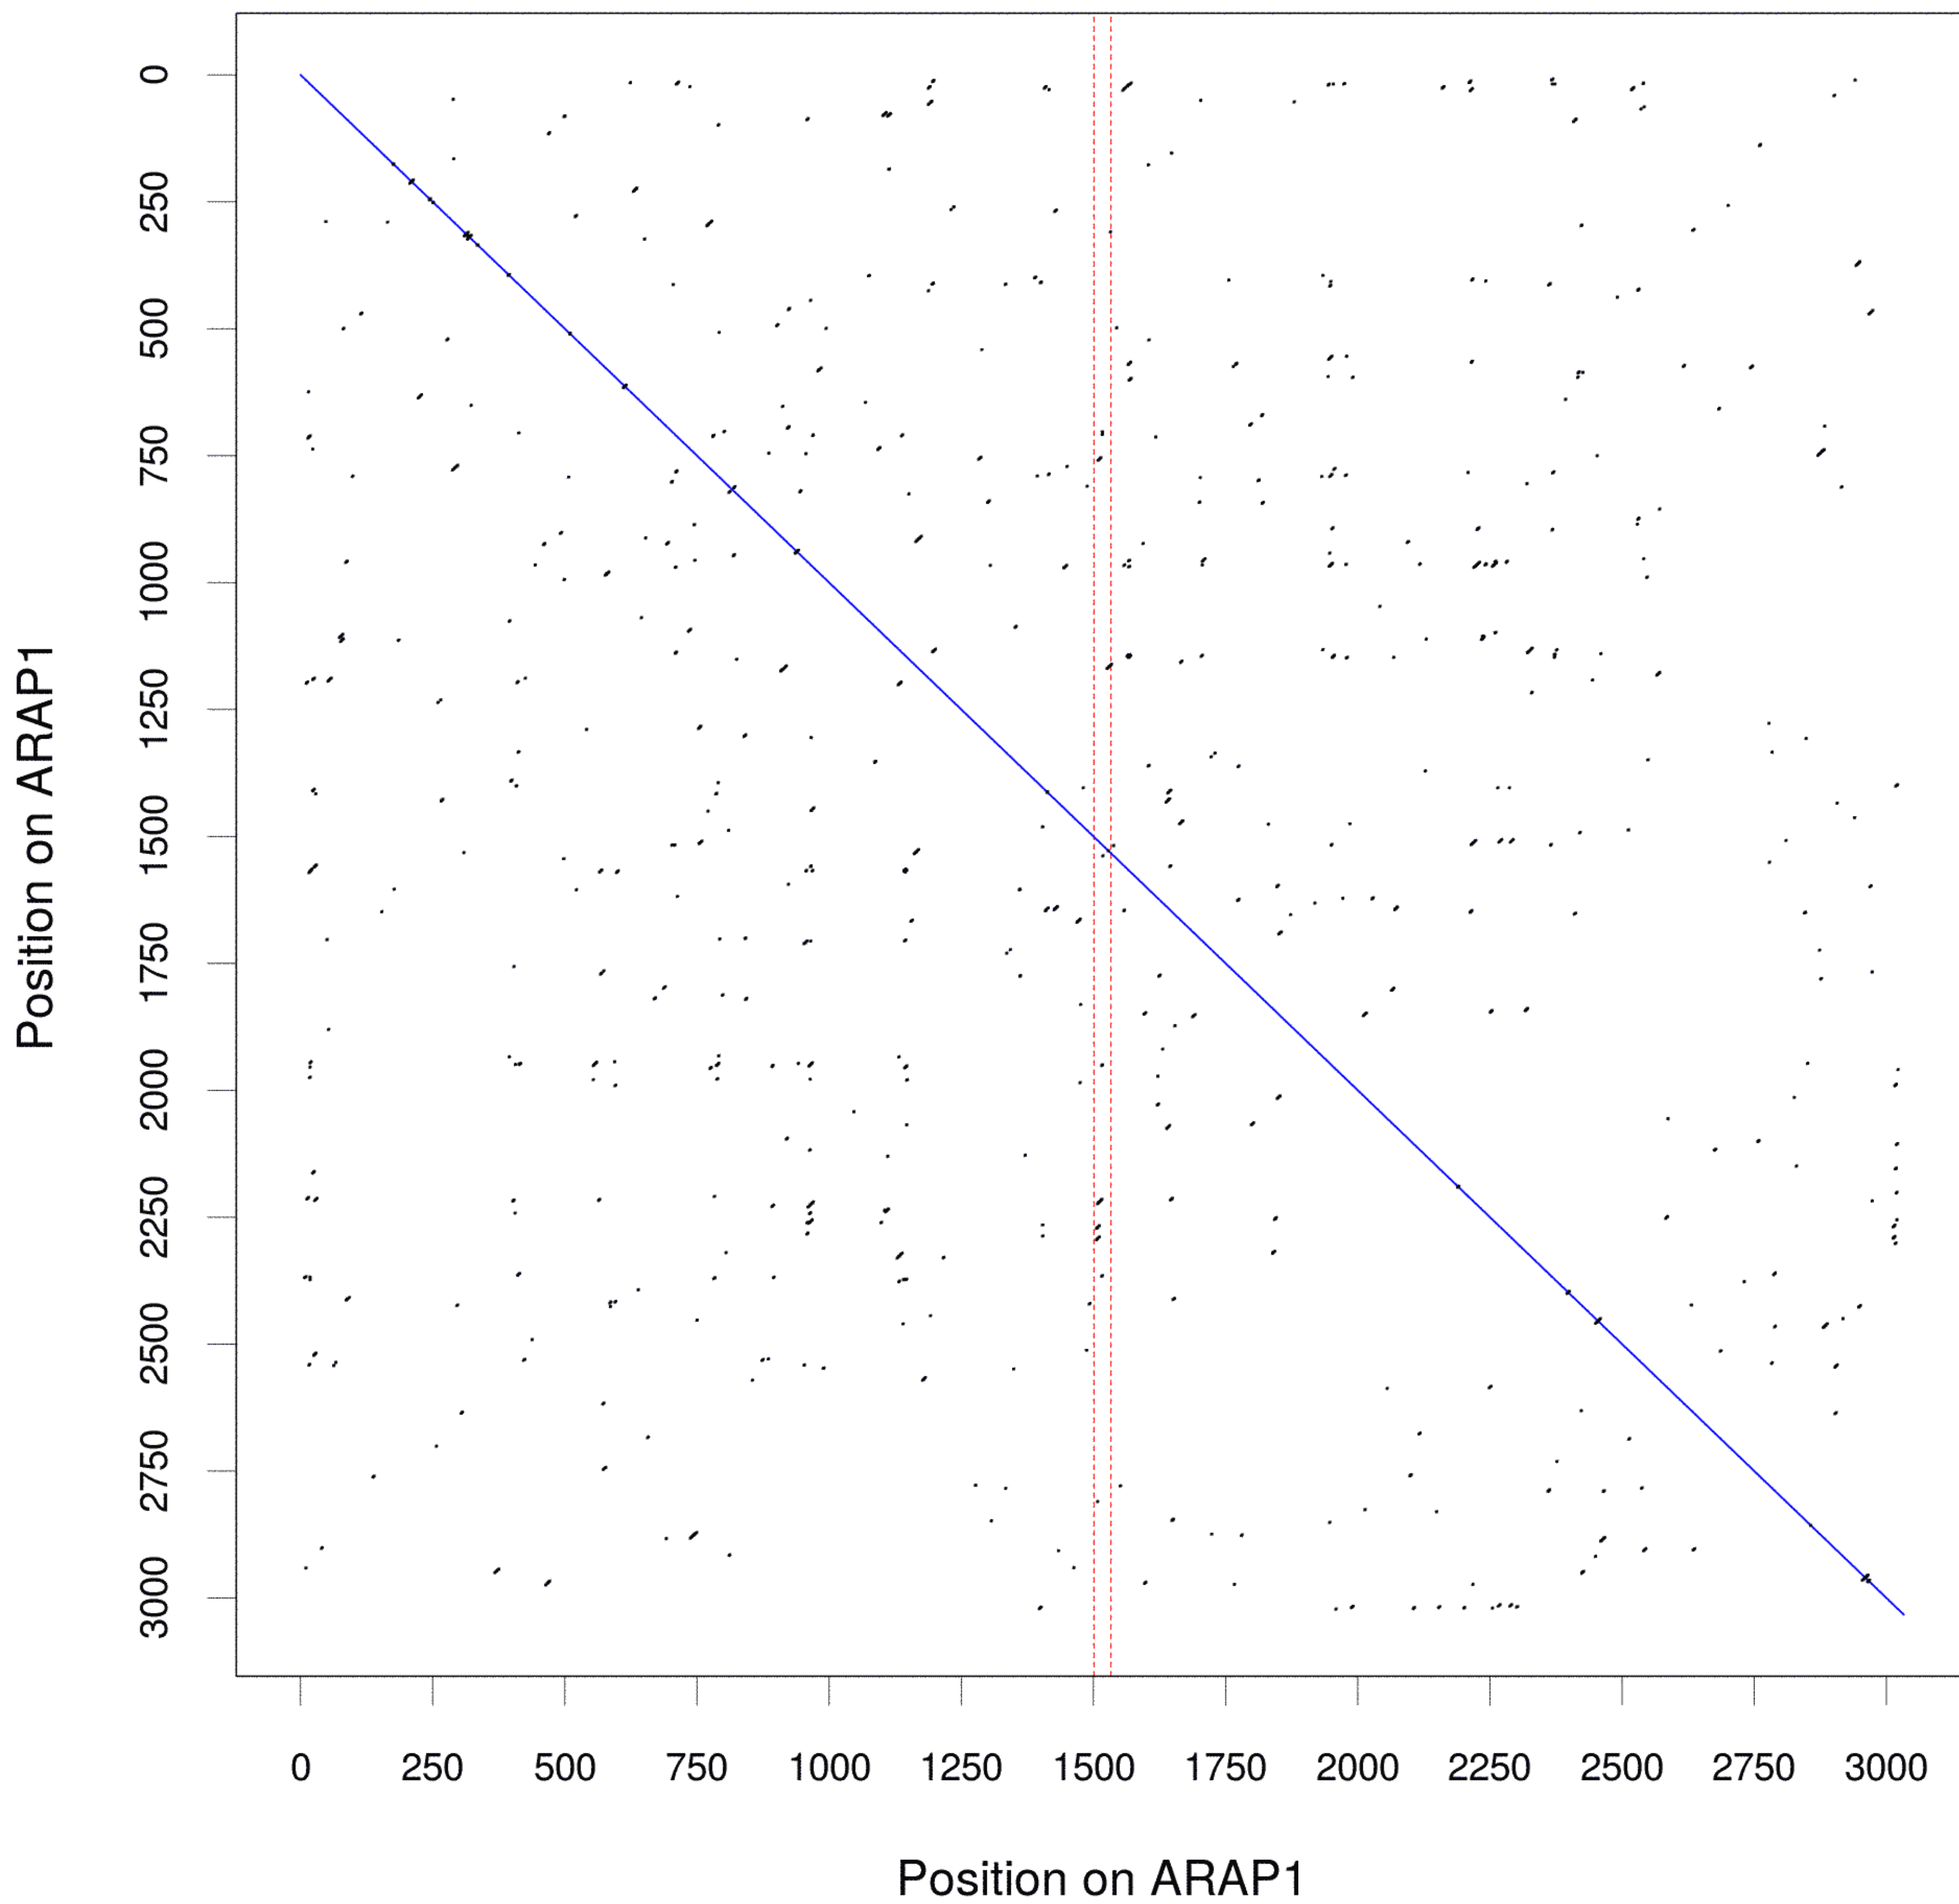

# ARF1

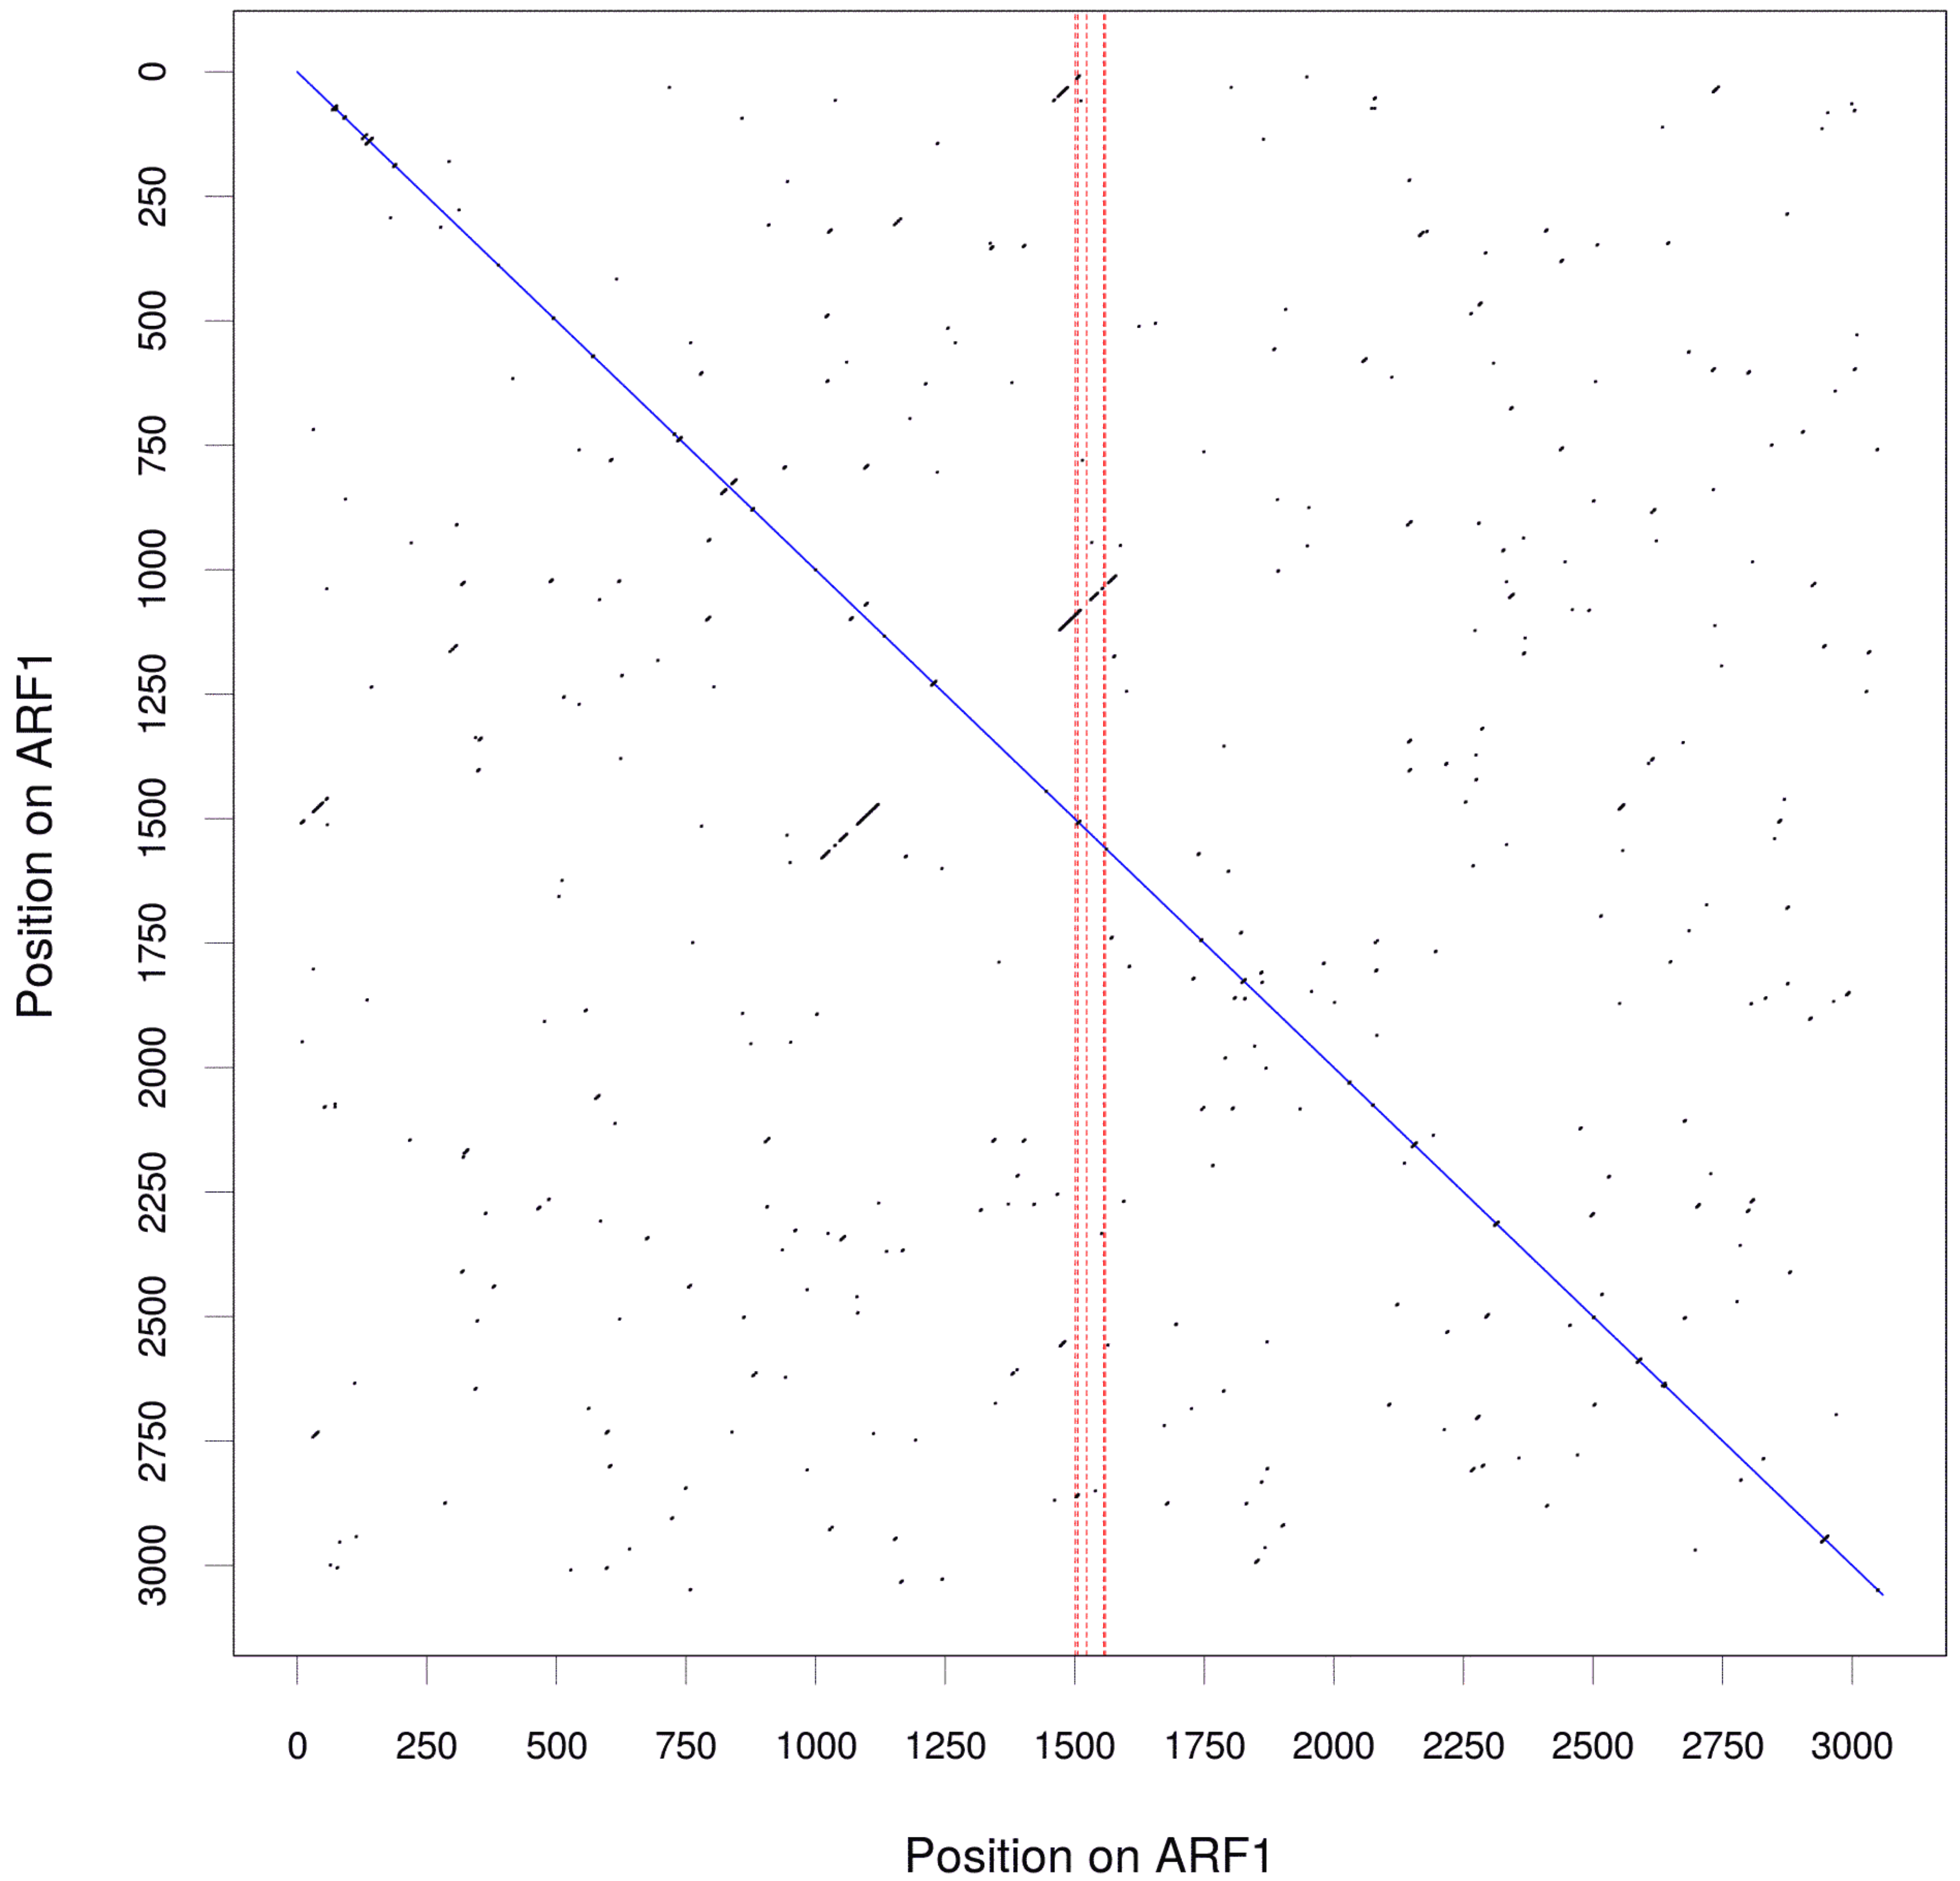

# ARHGAP17

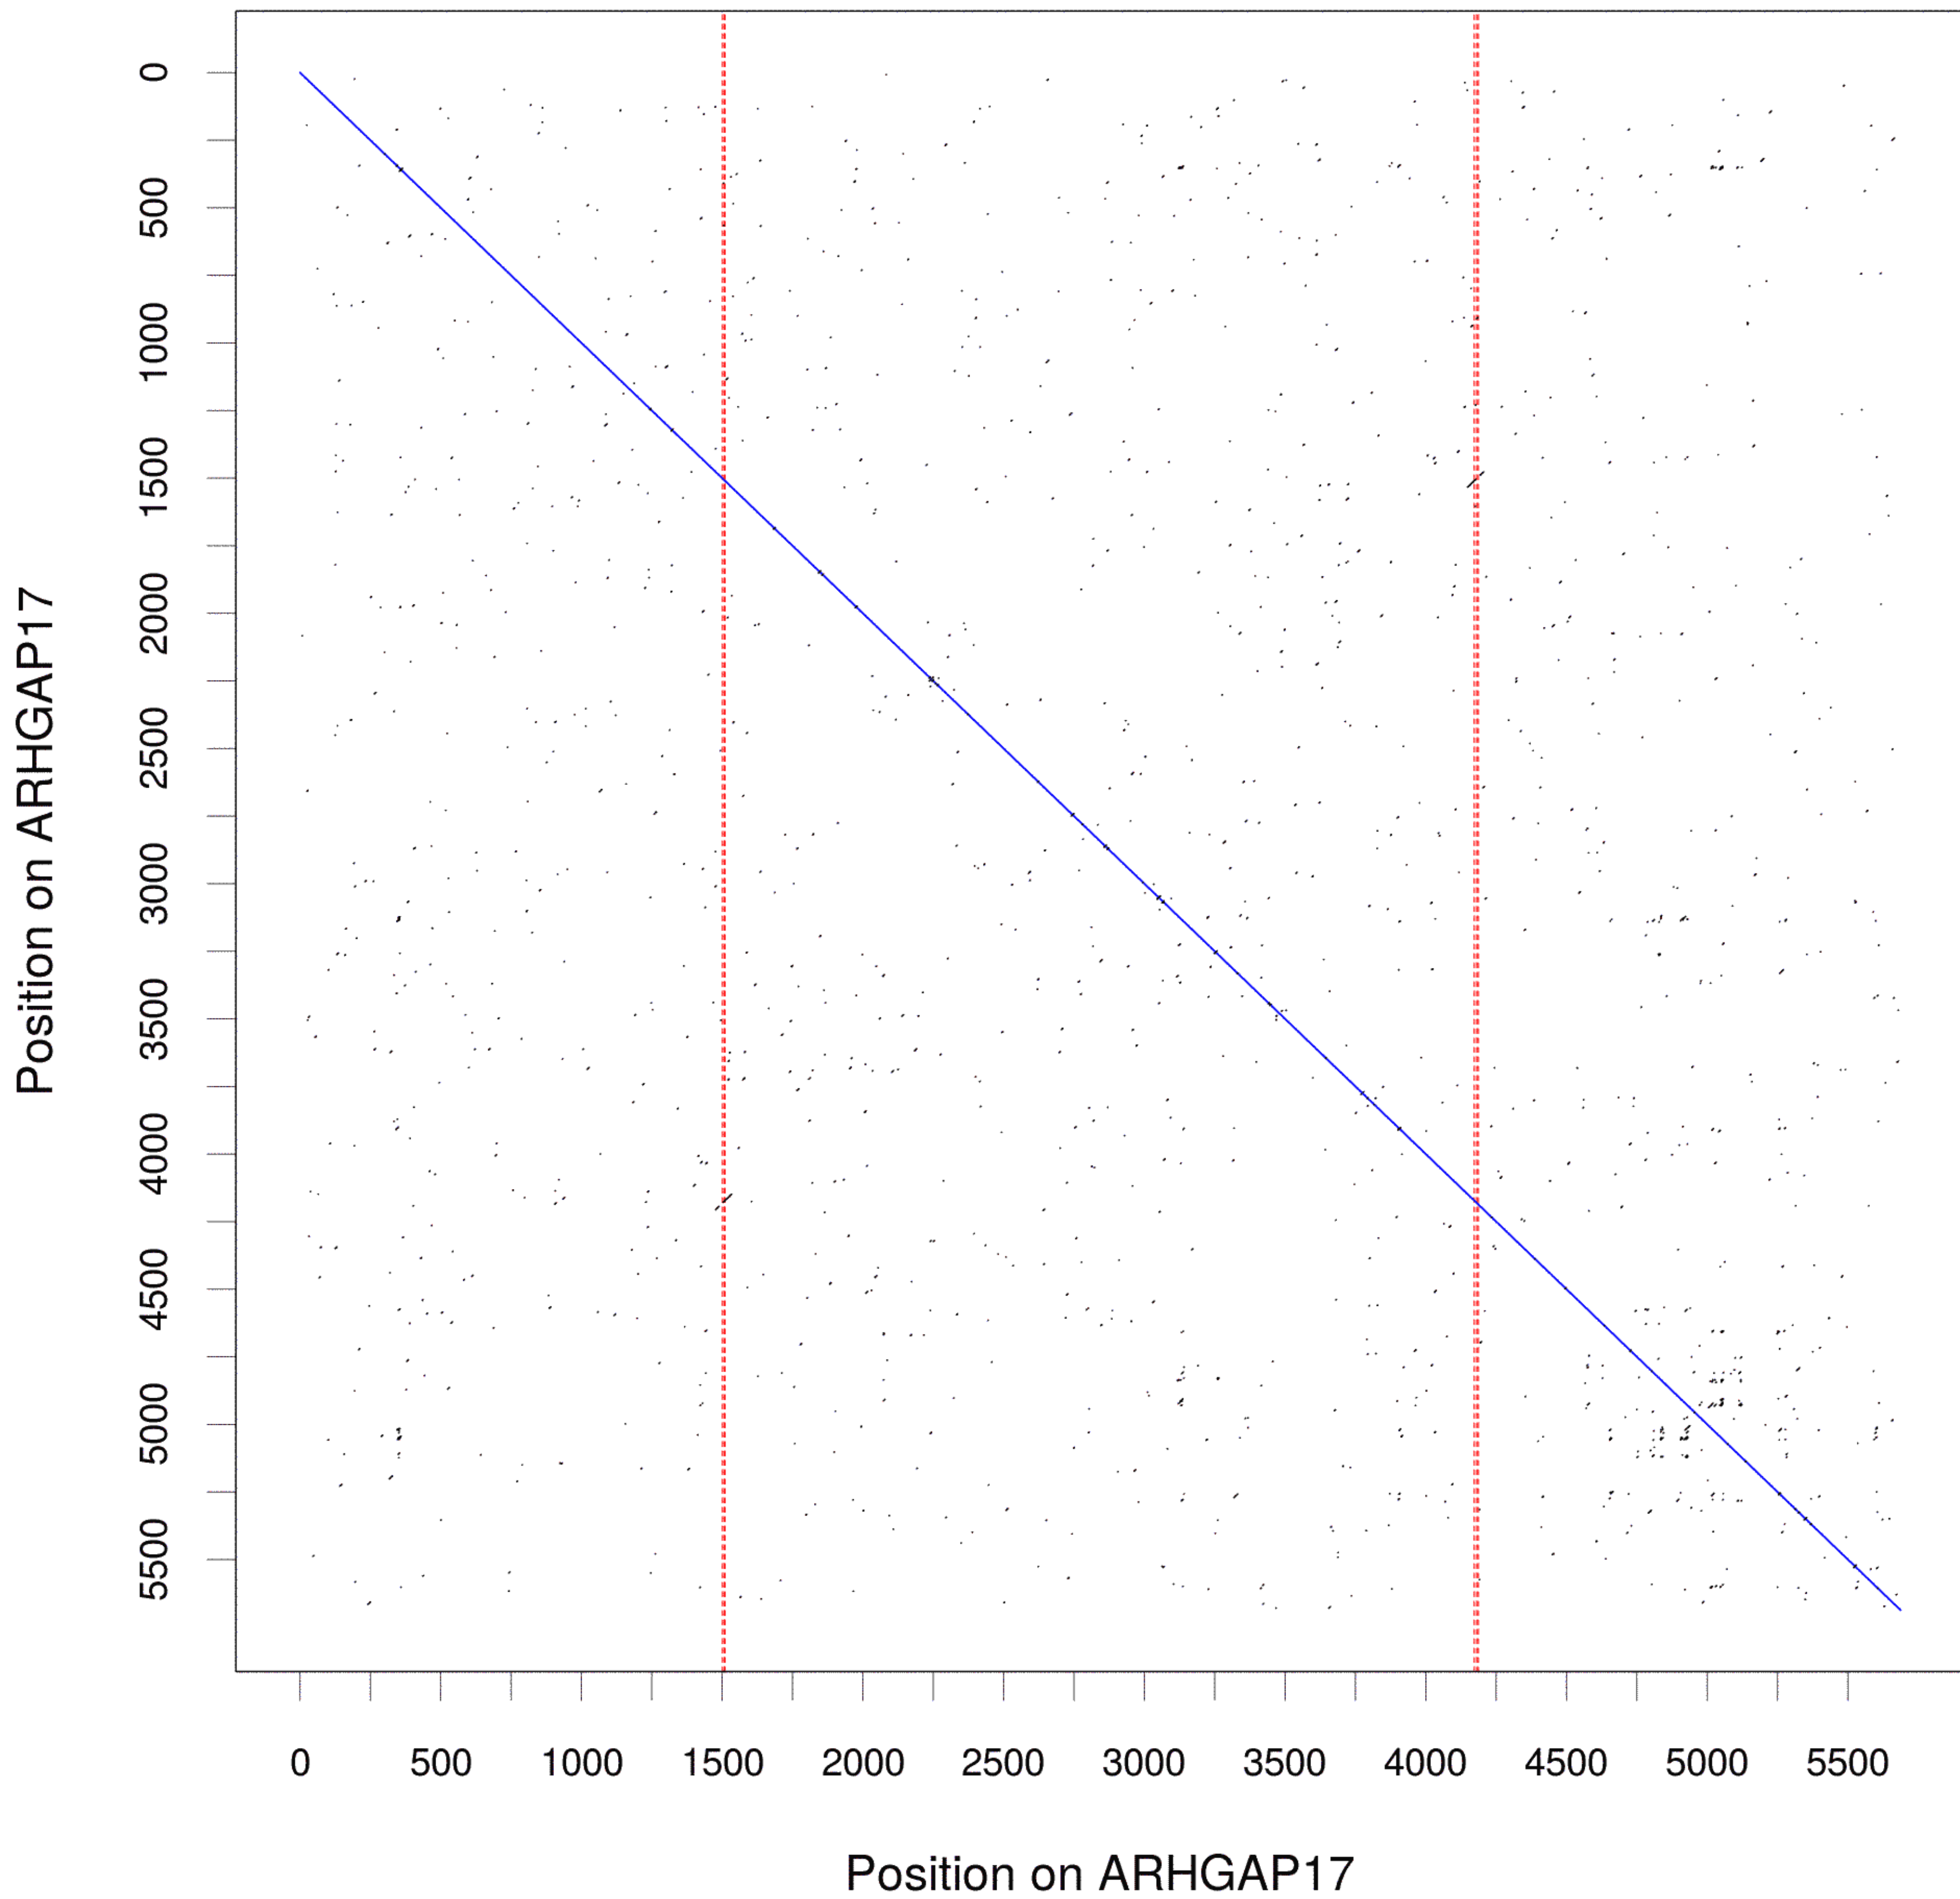

# ASPSCR1

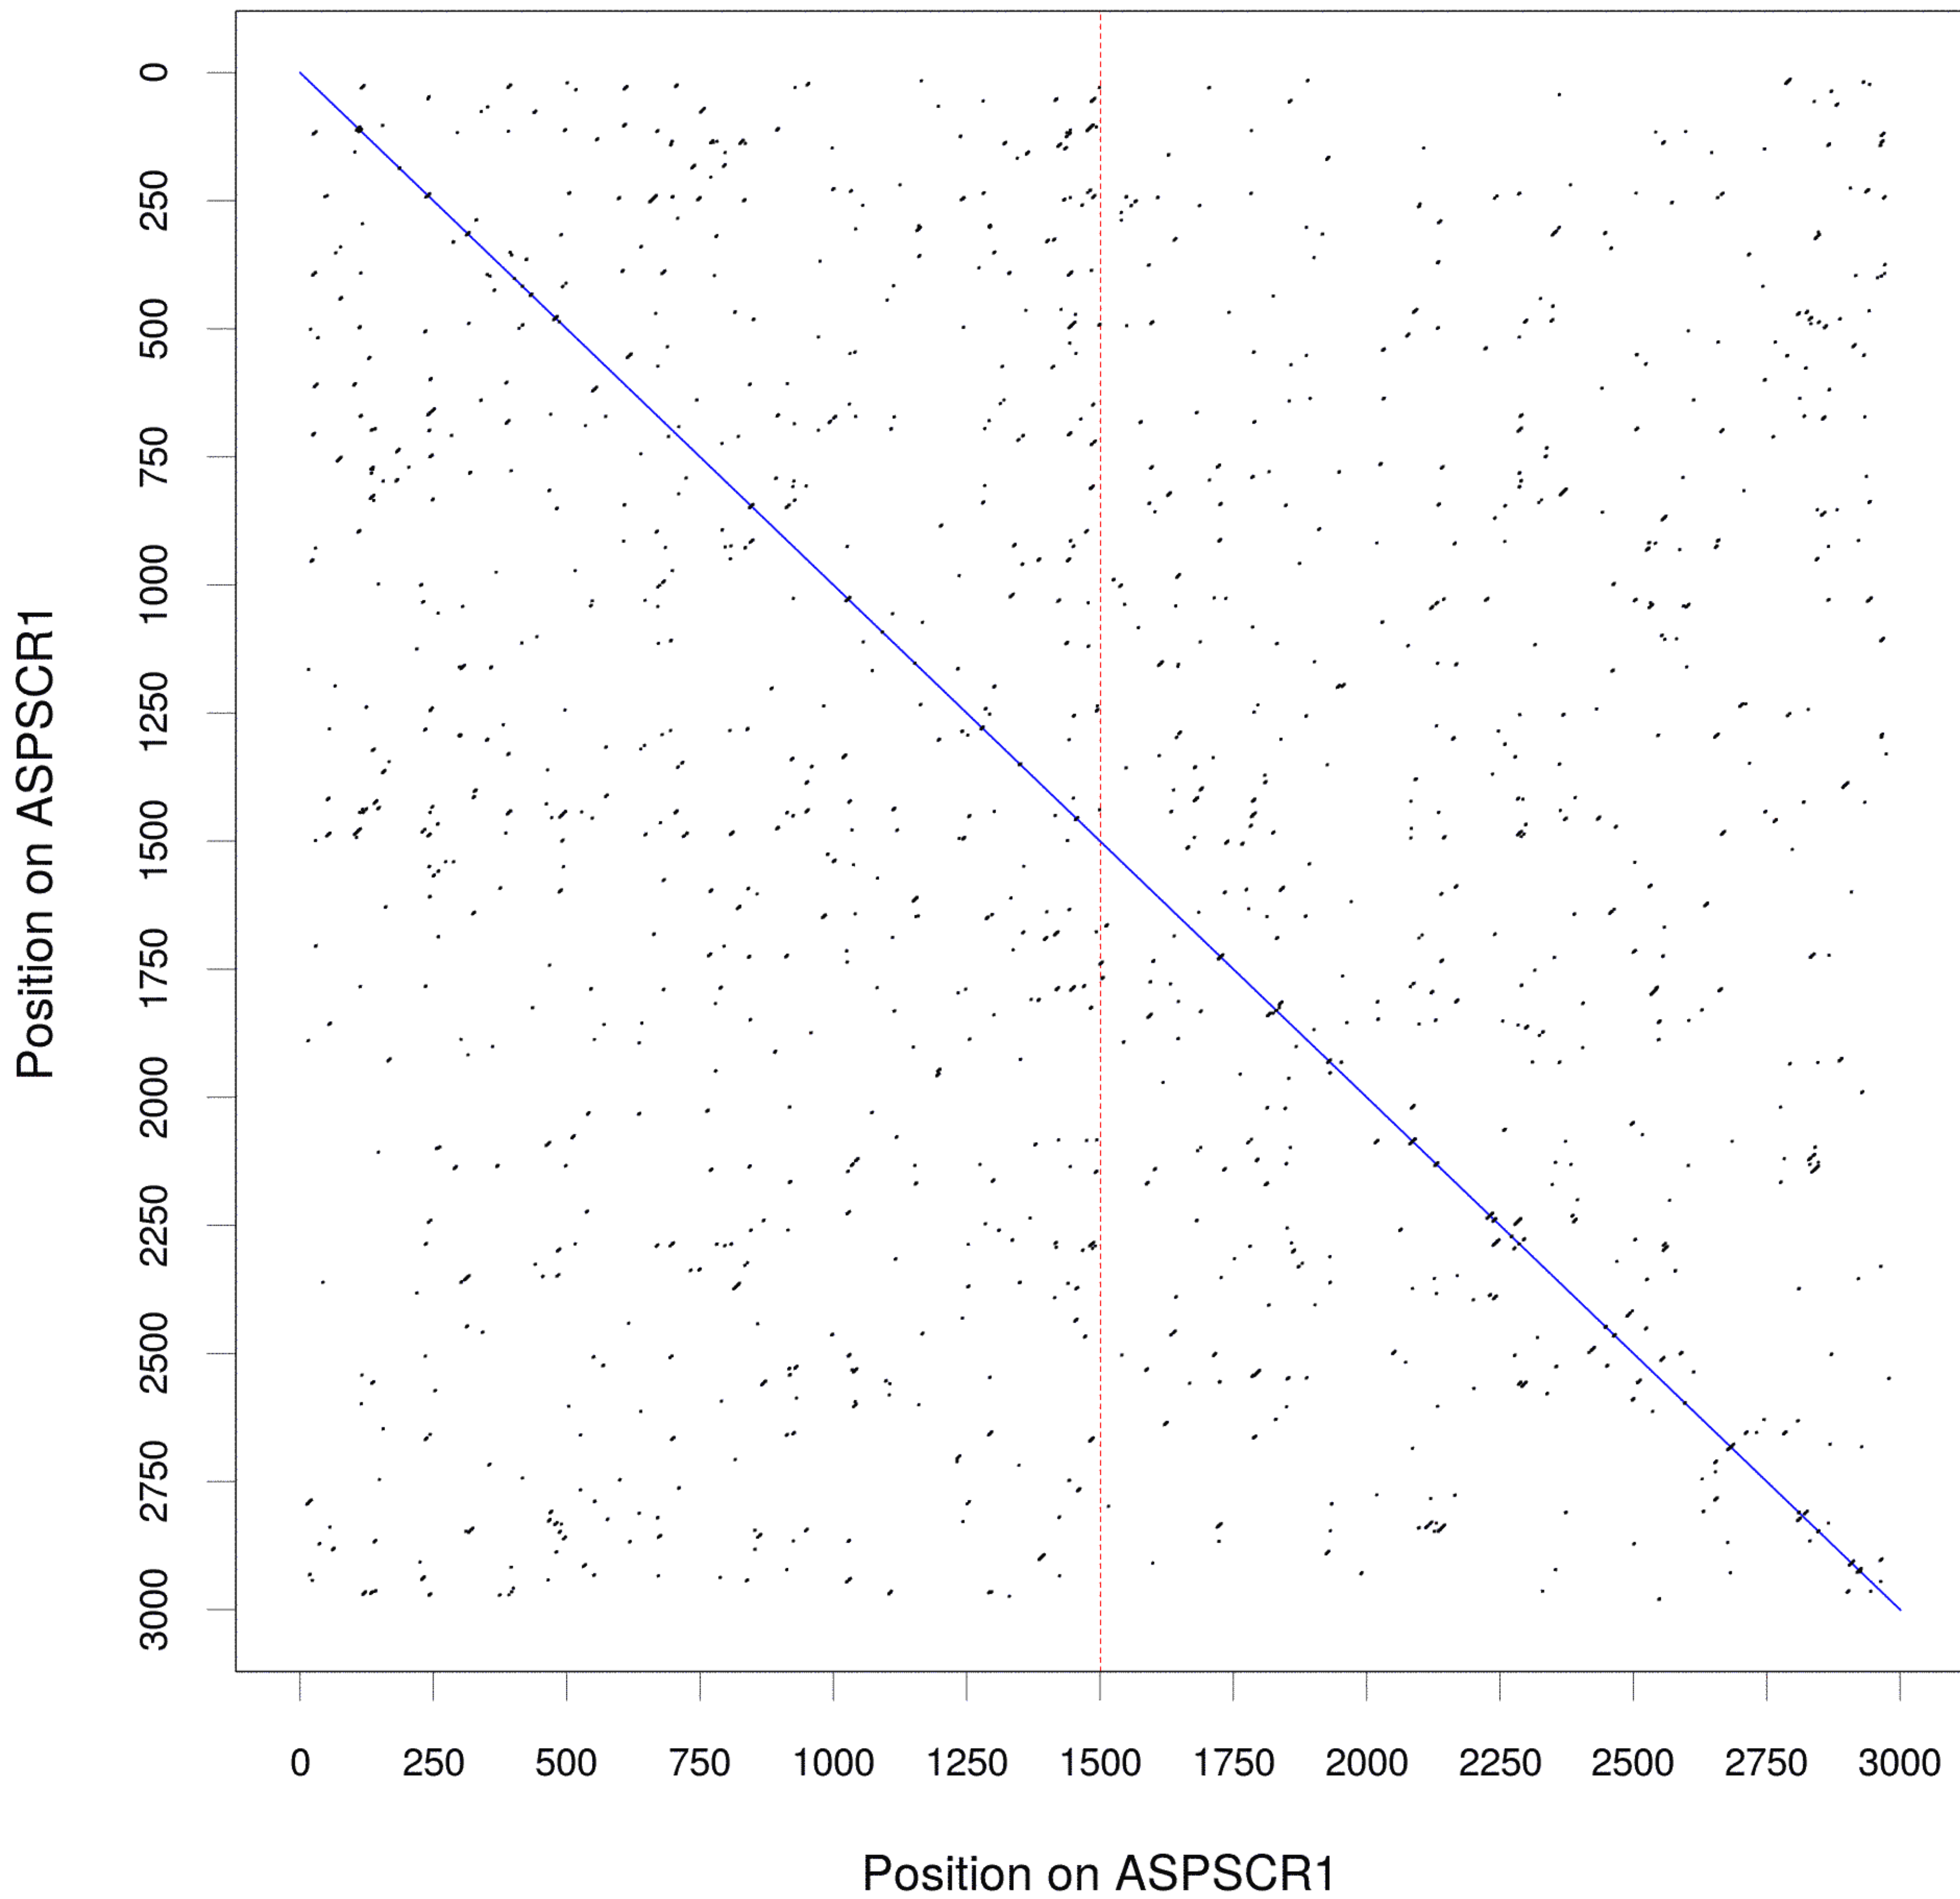

# ATF5

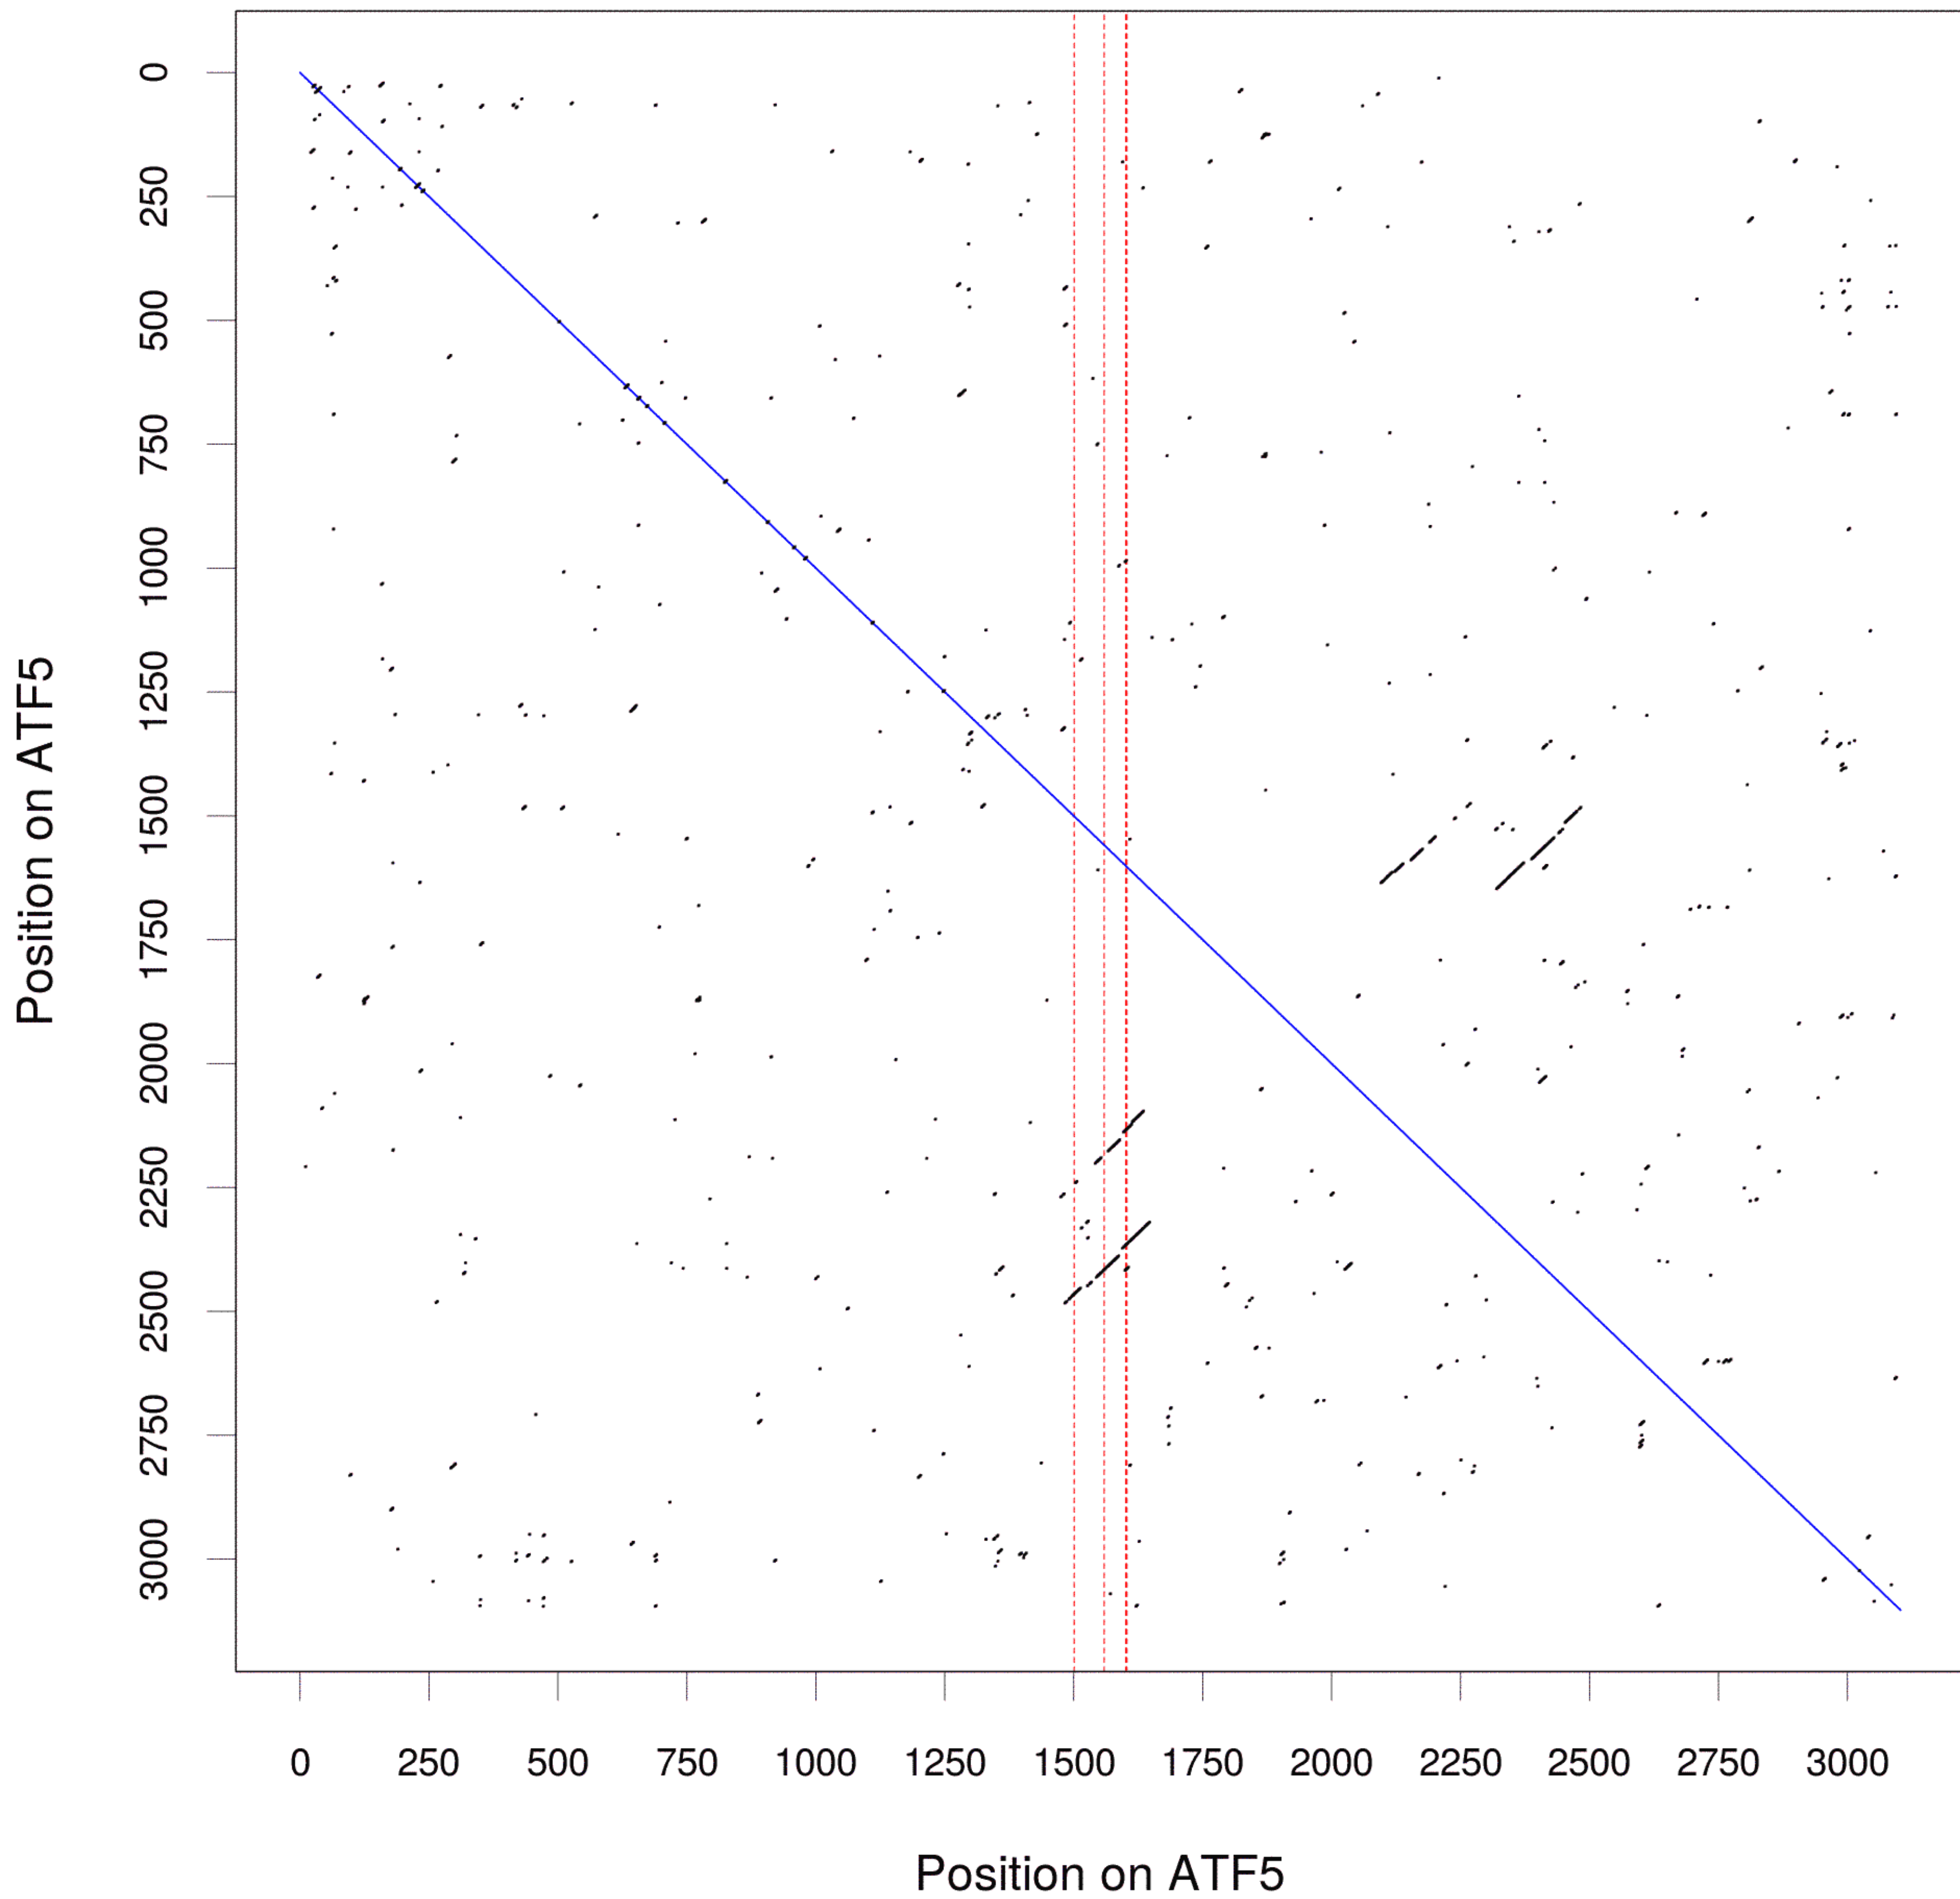

# ATP13A1

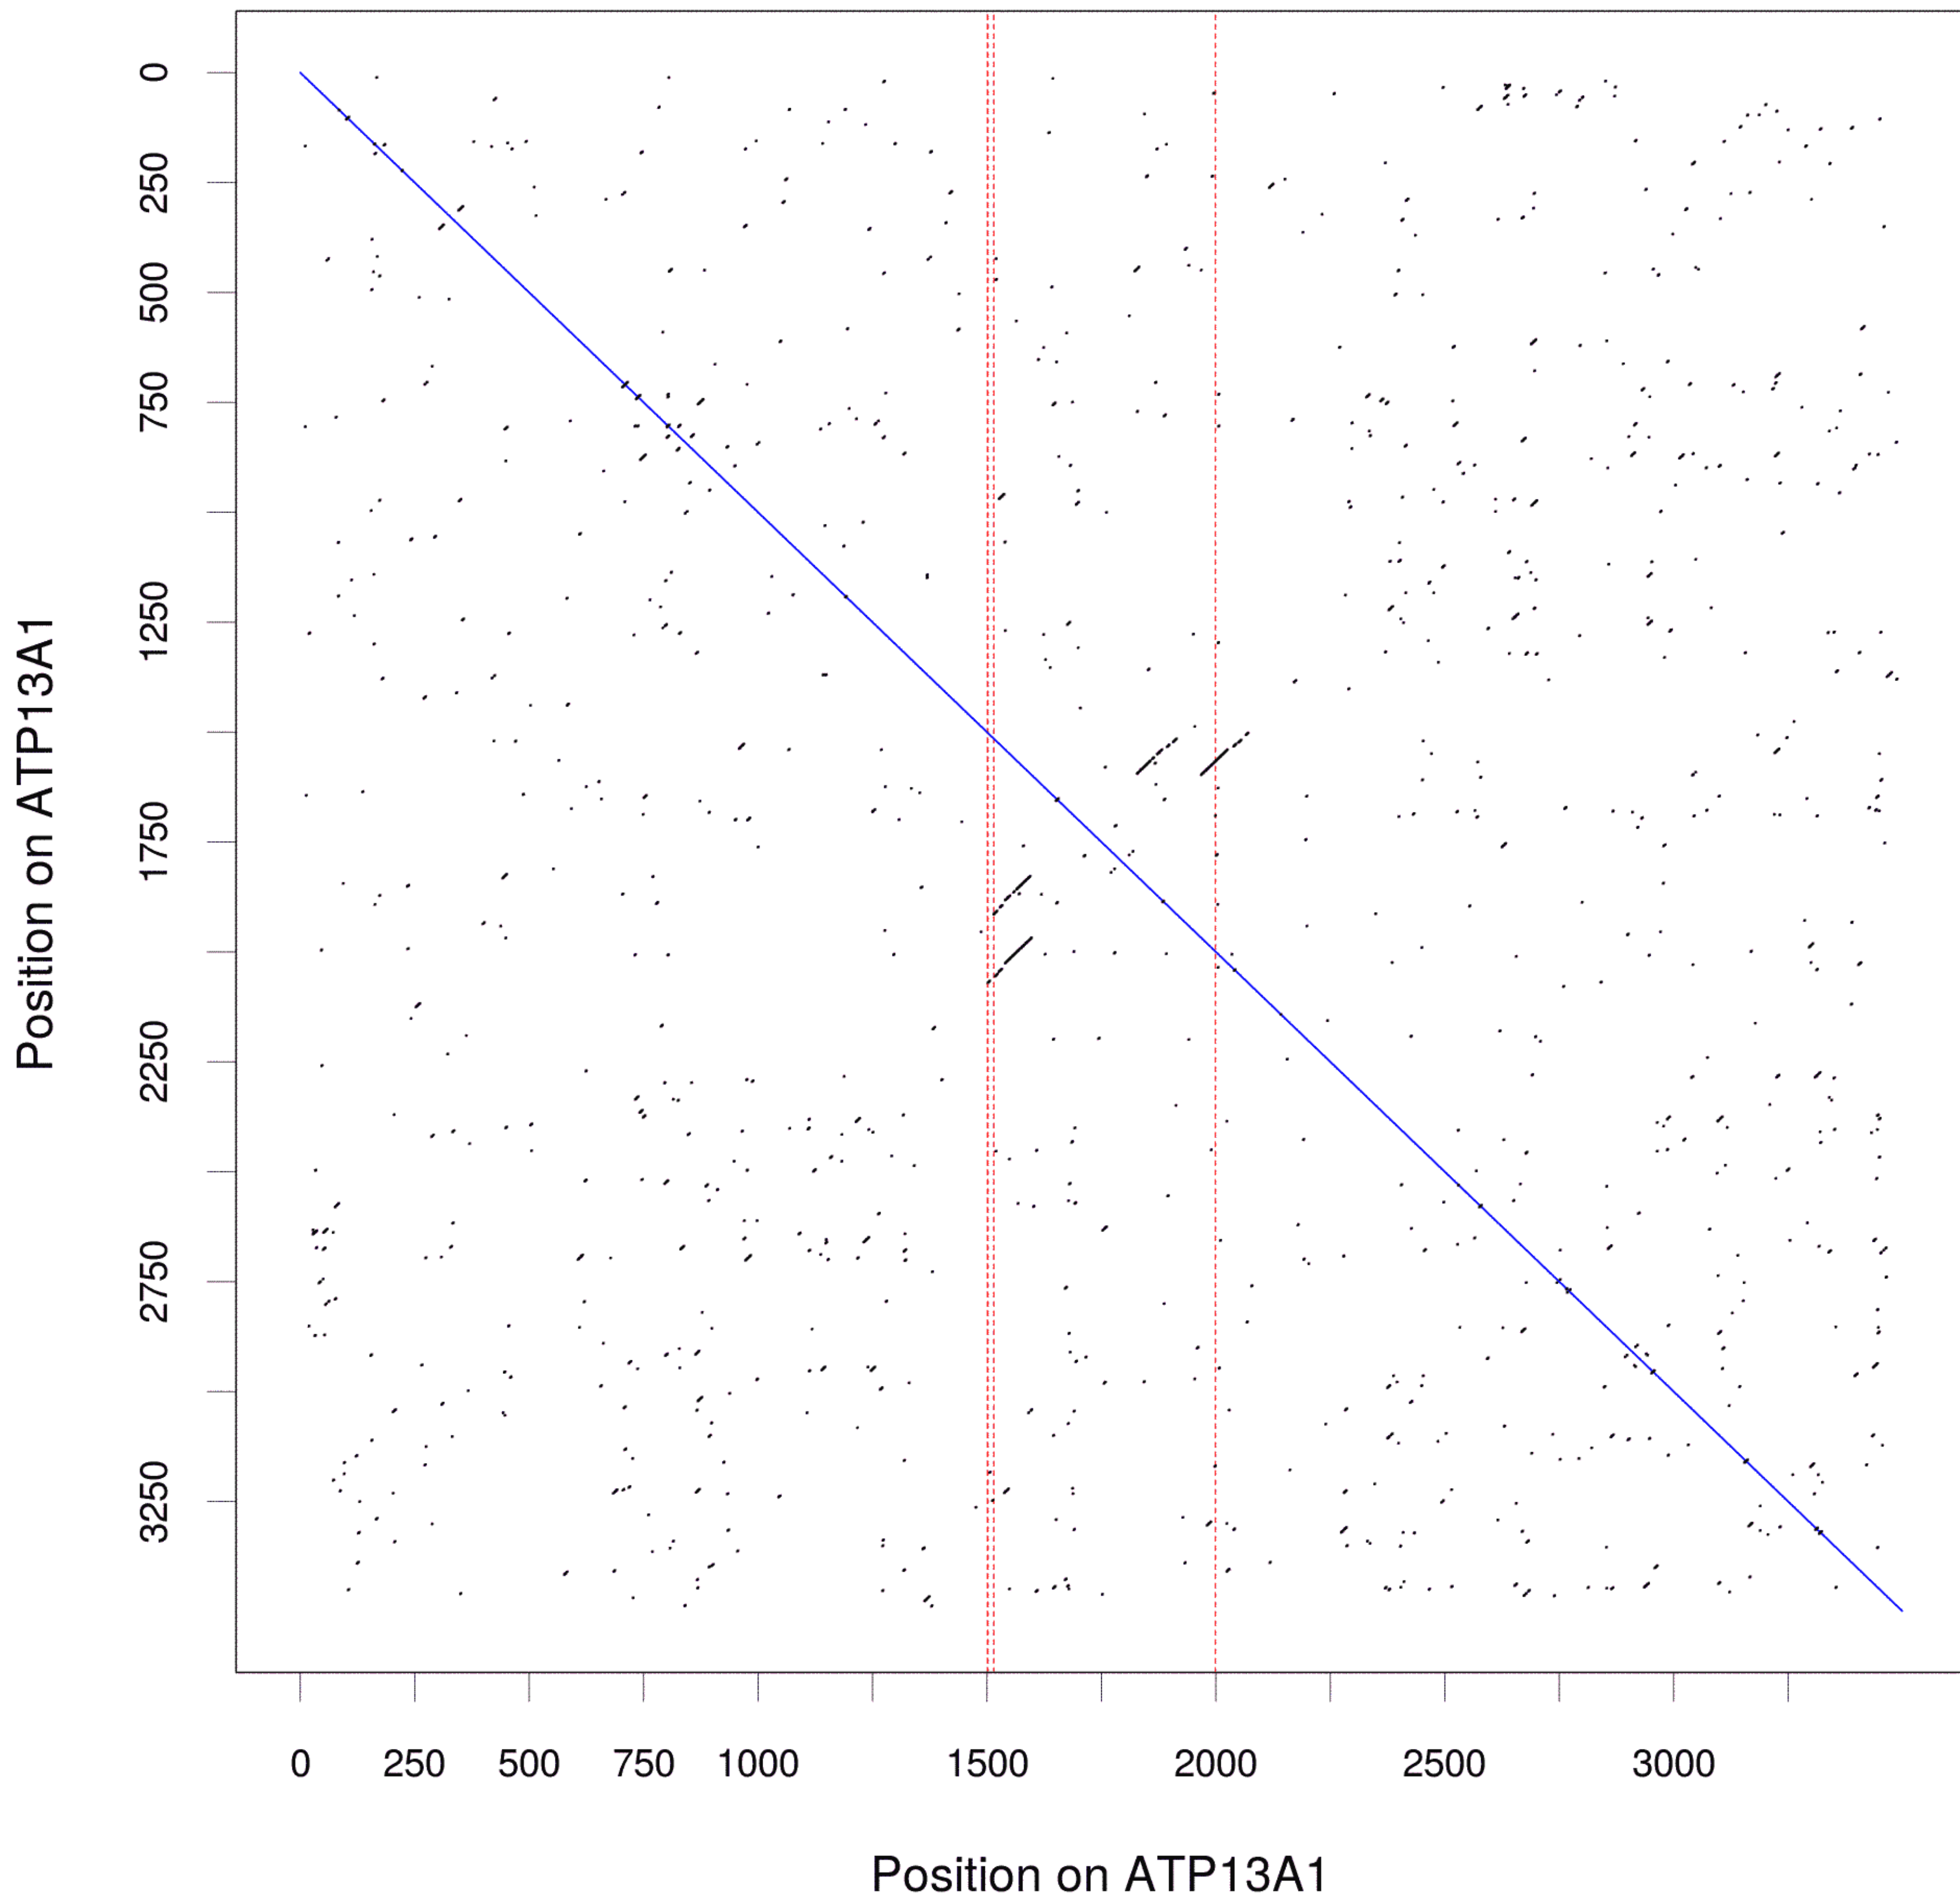



# ATP13A4

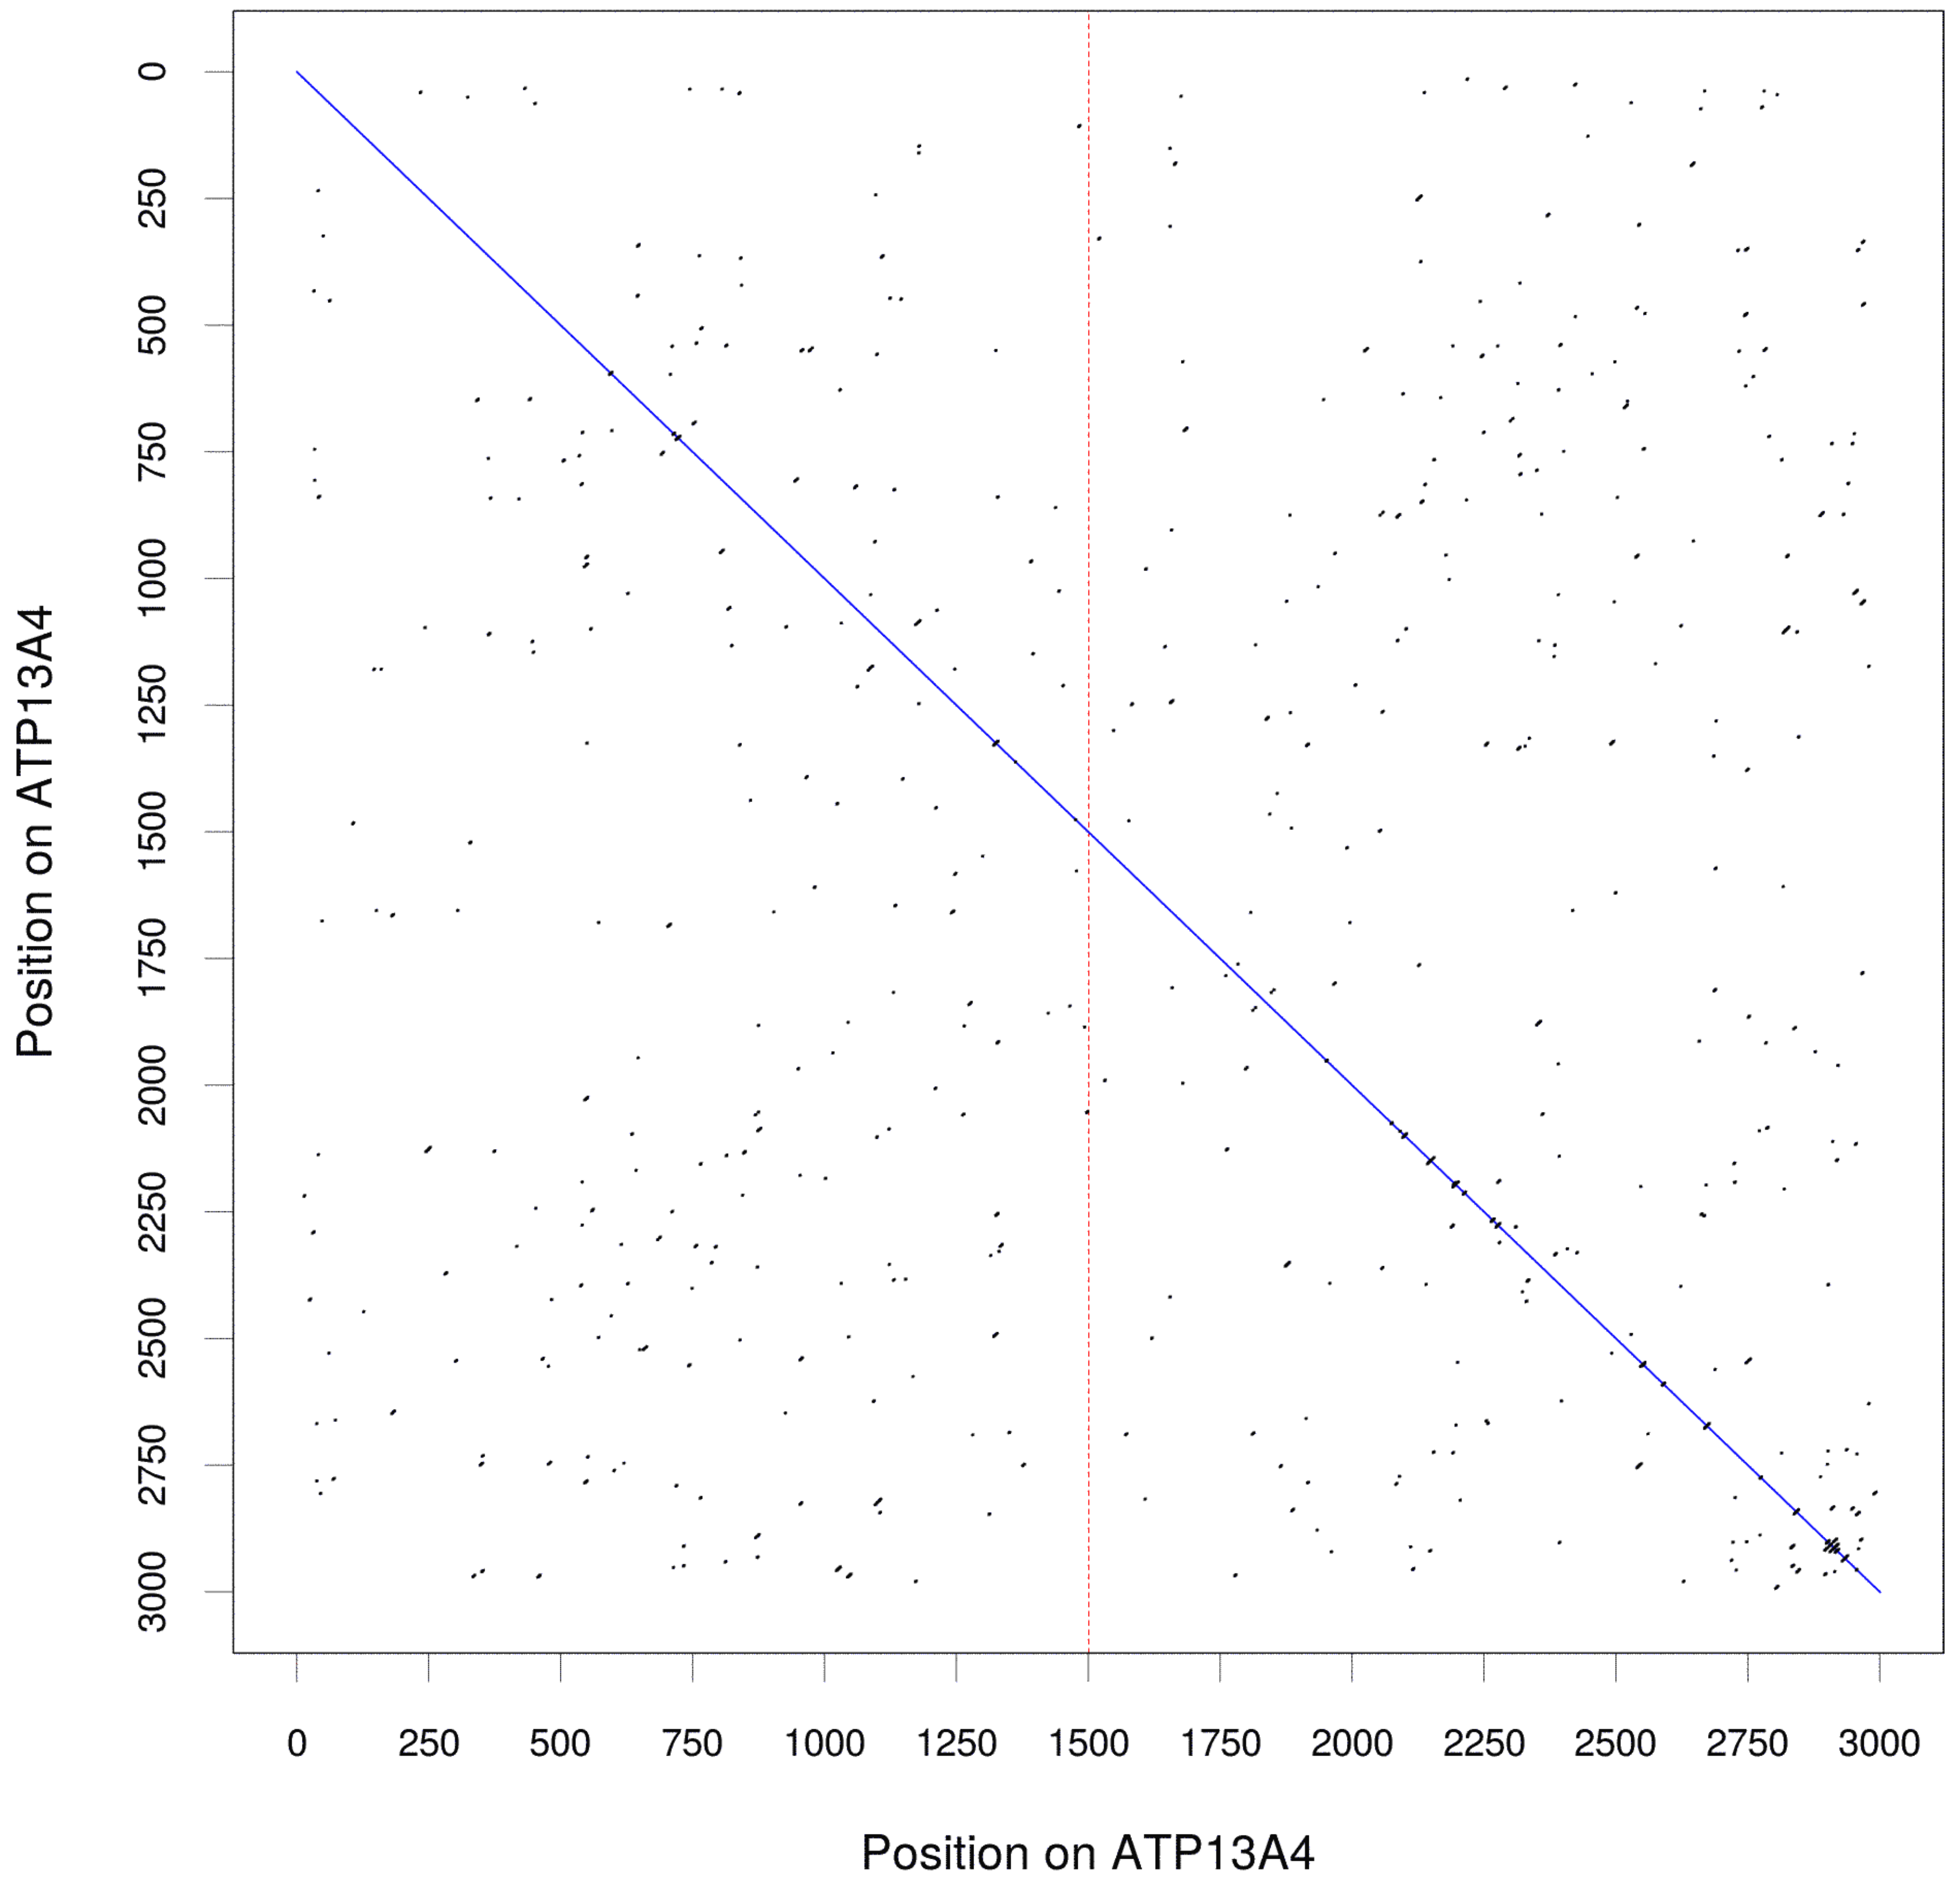

# AURKAIP1

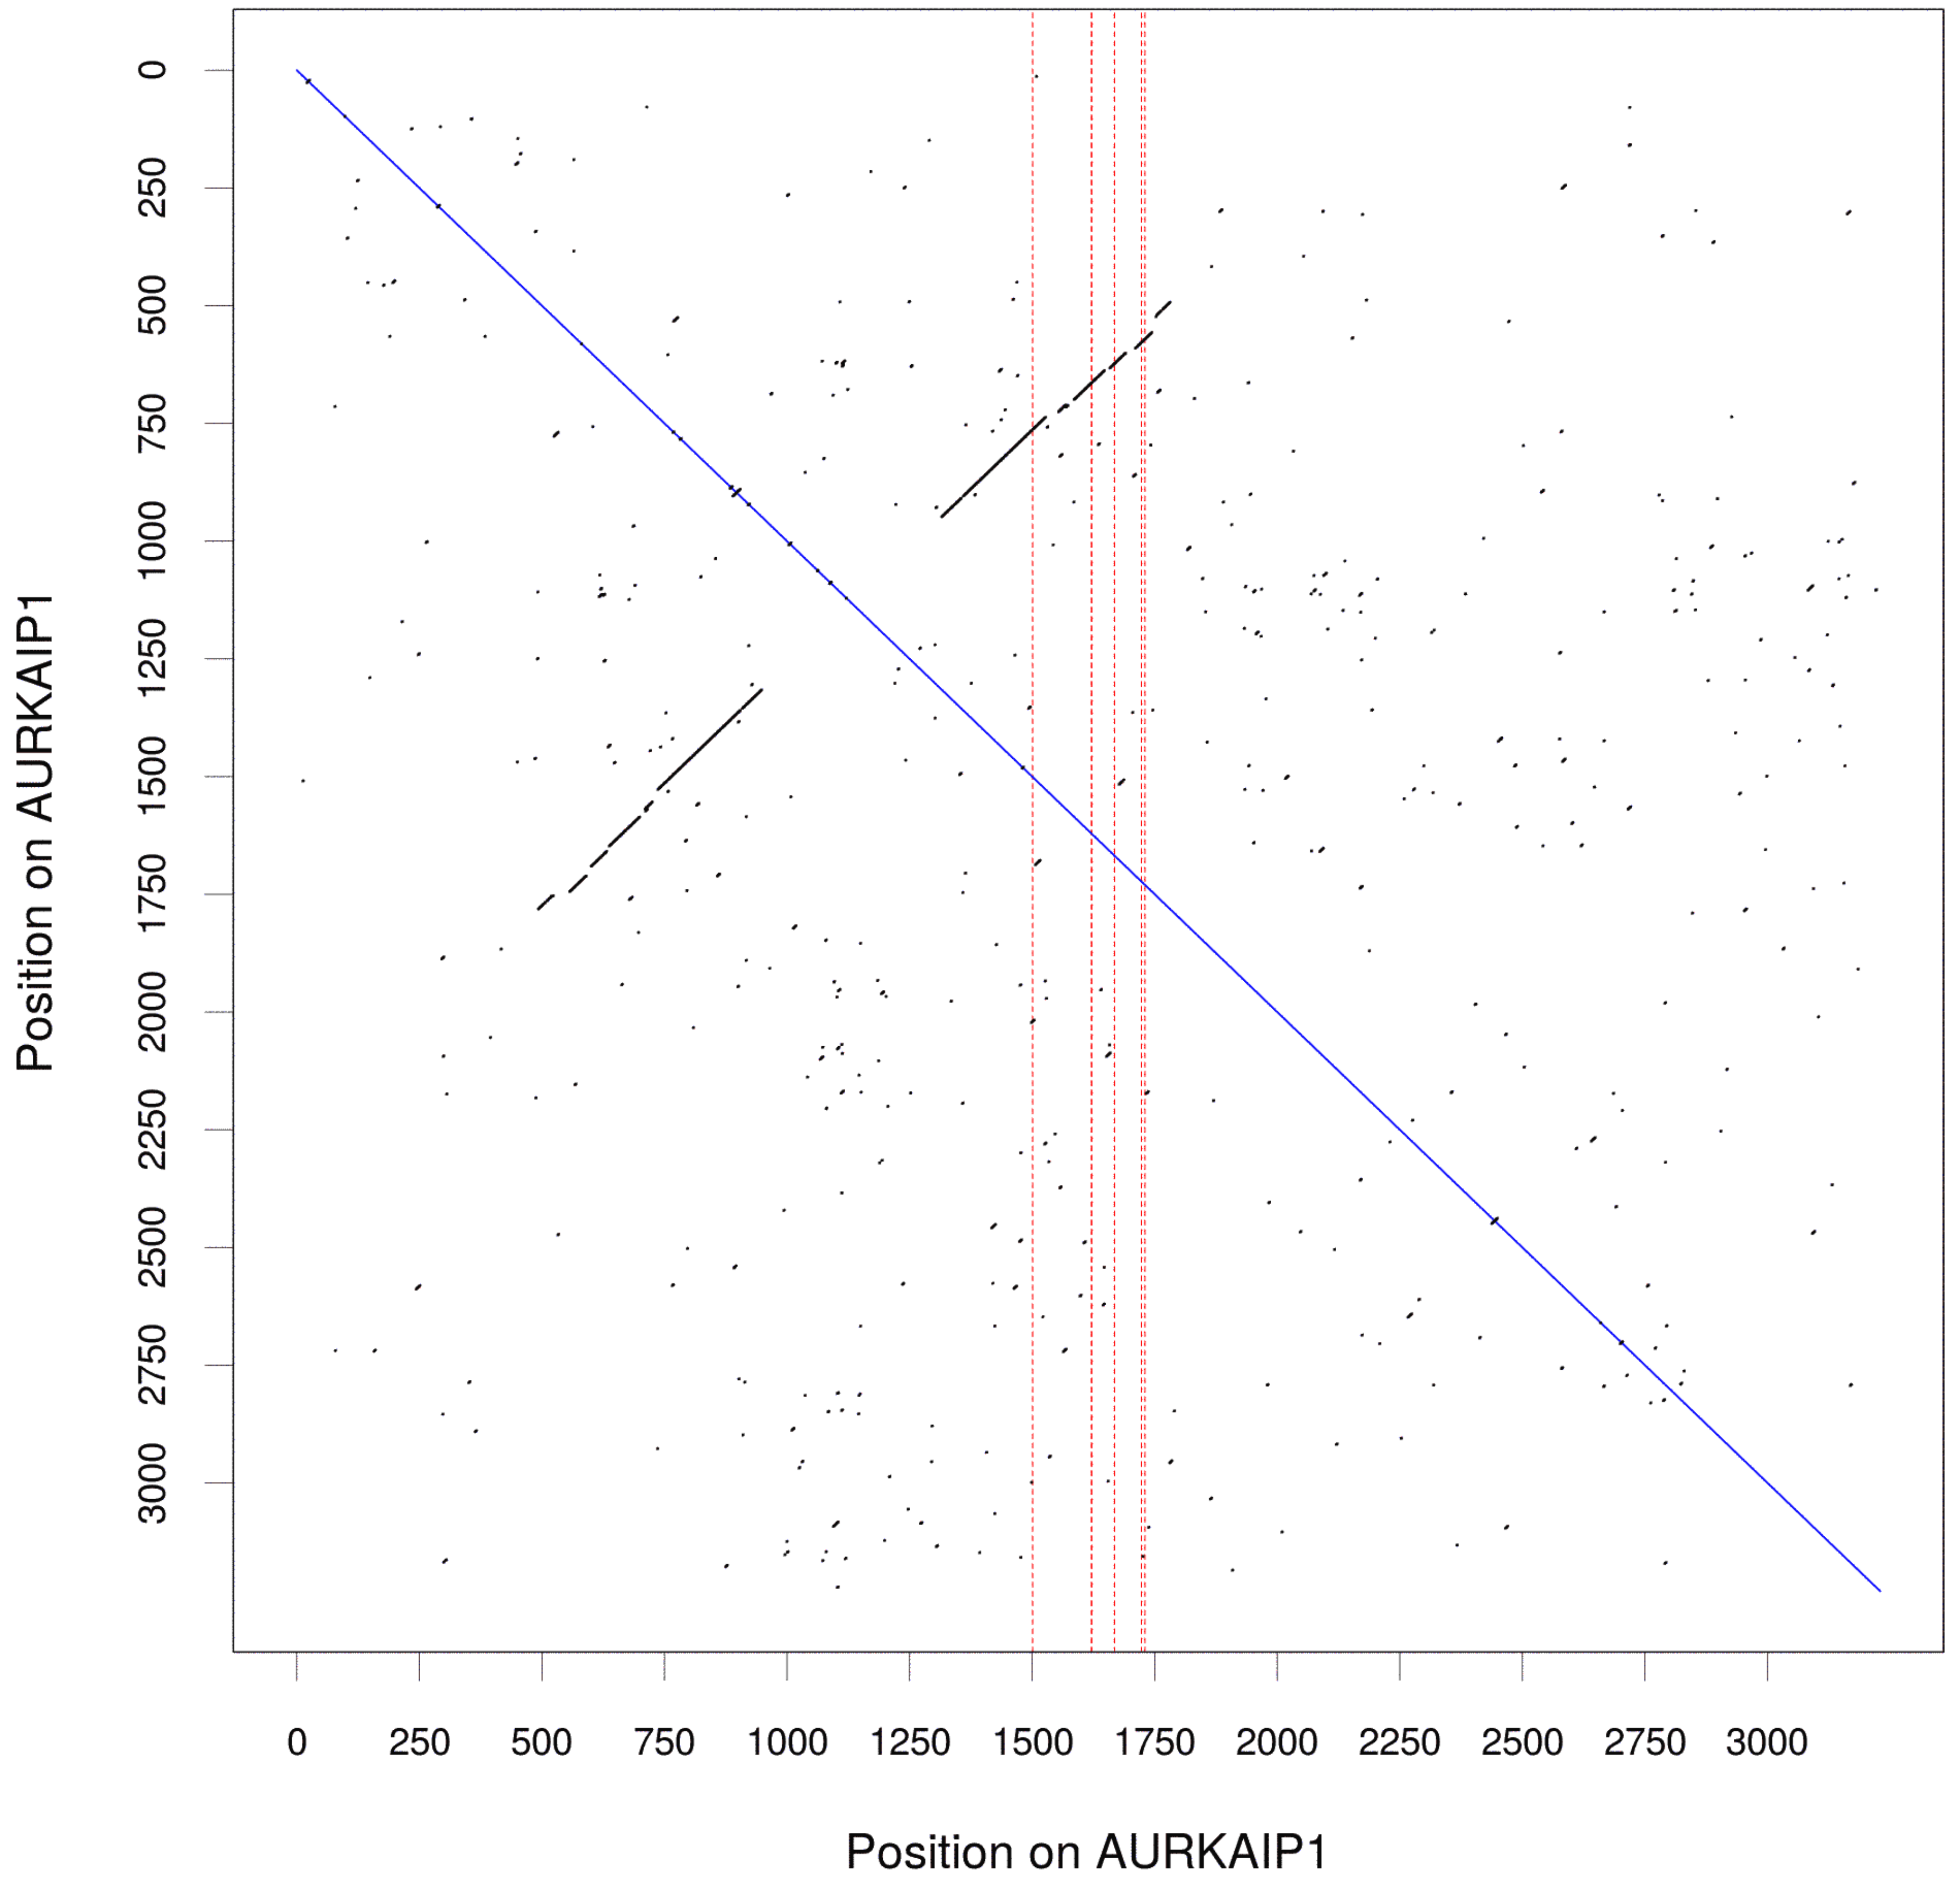

# B4GALT1

Position on B4GALT1

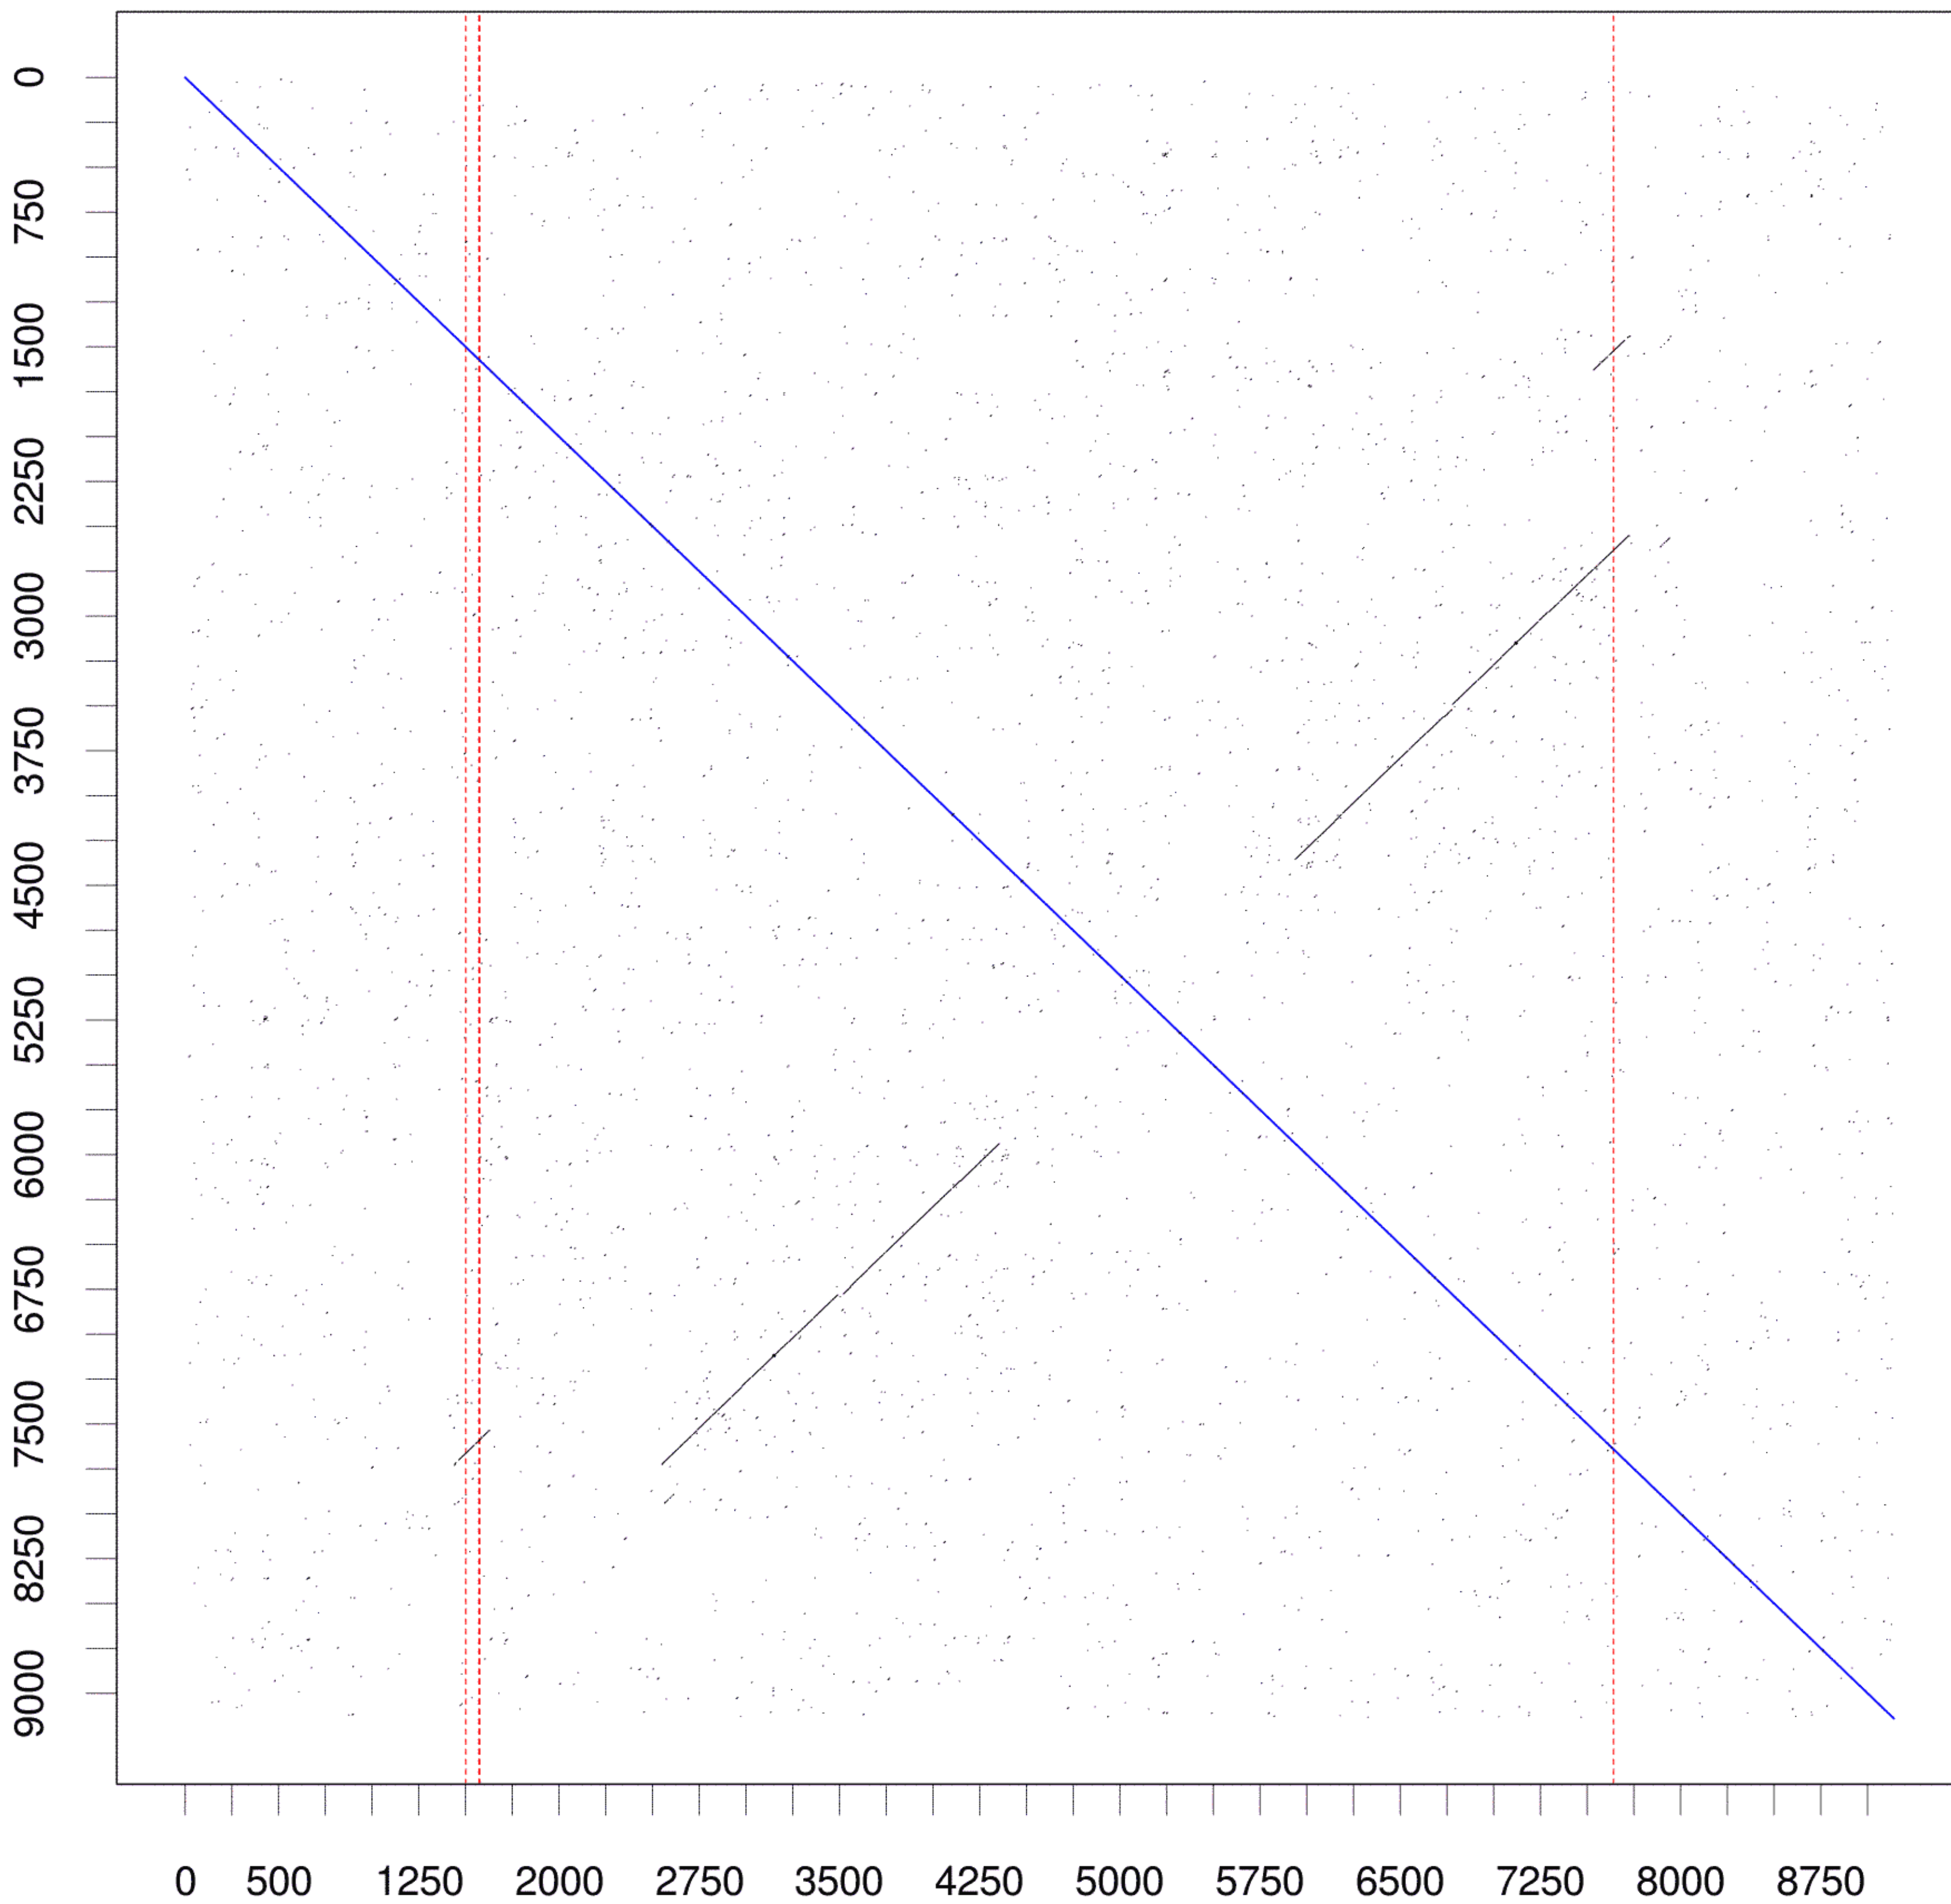

Position on B4GALT1

# BAG4

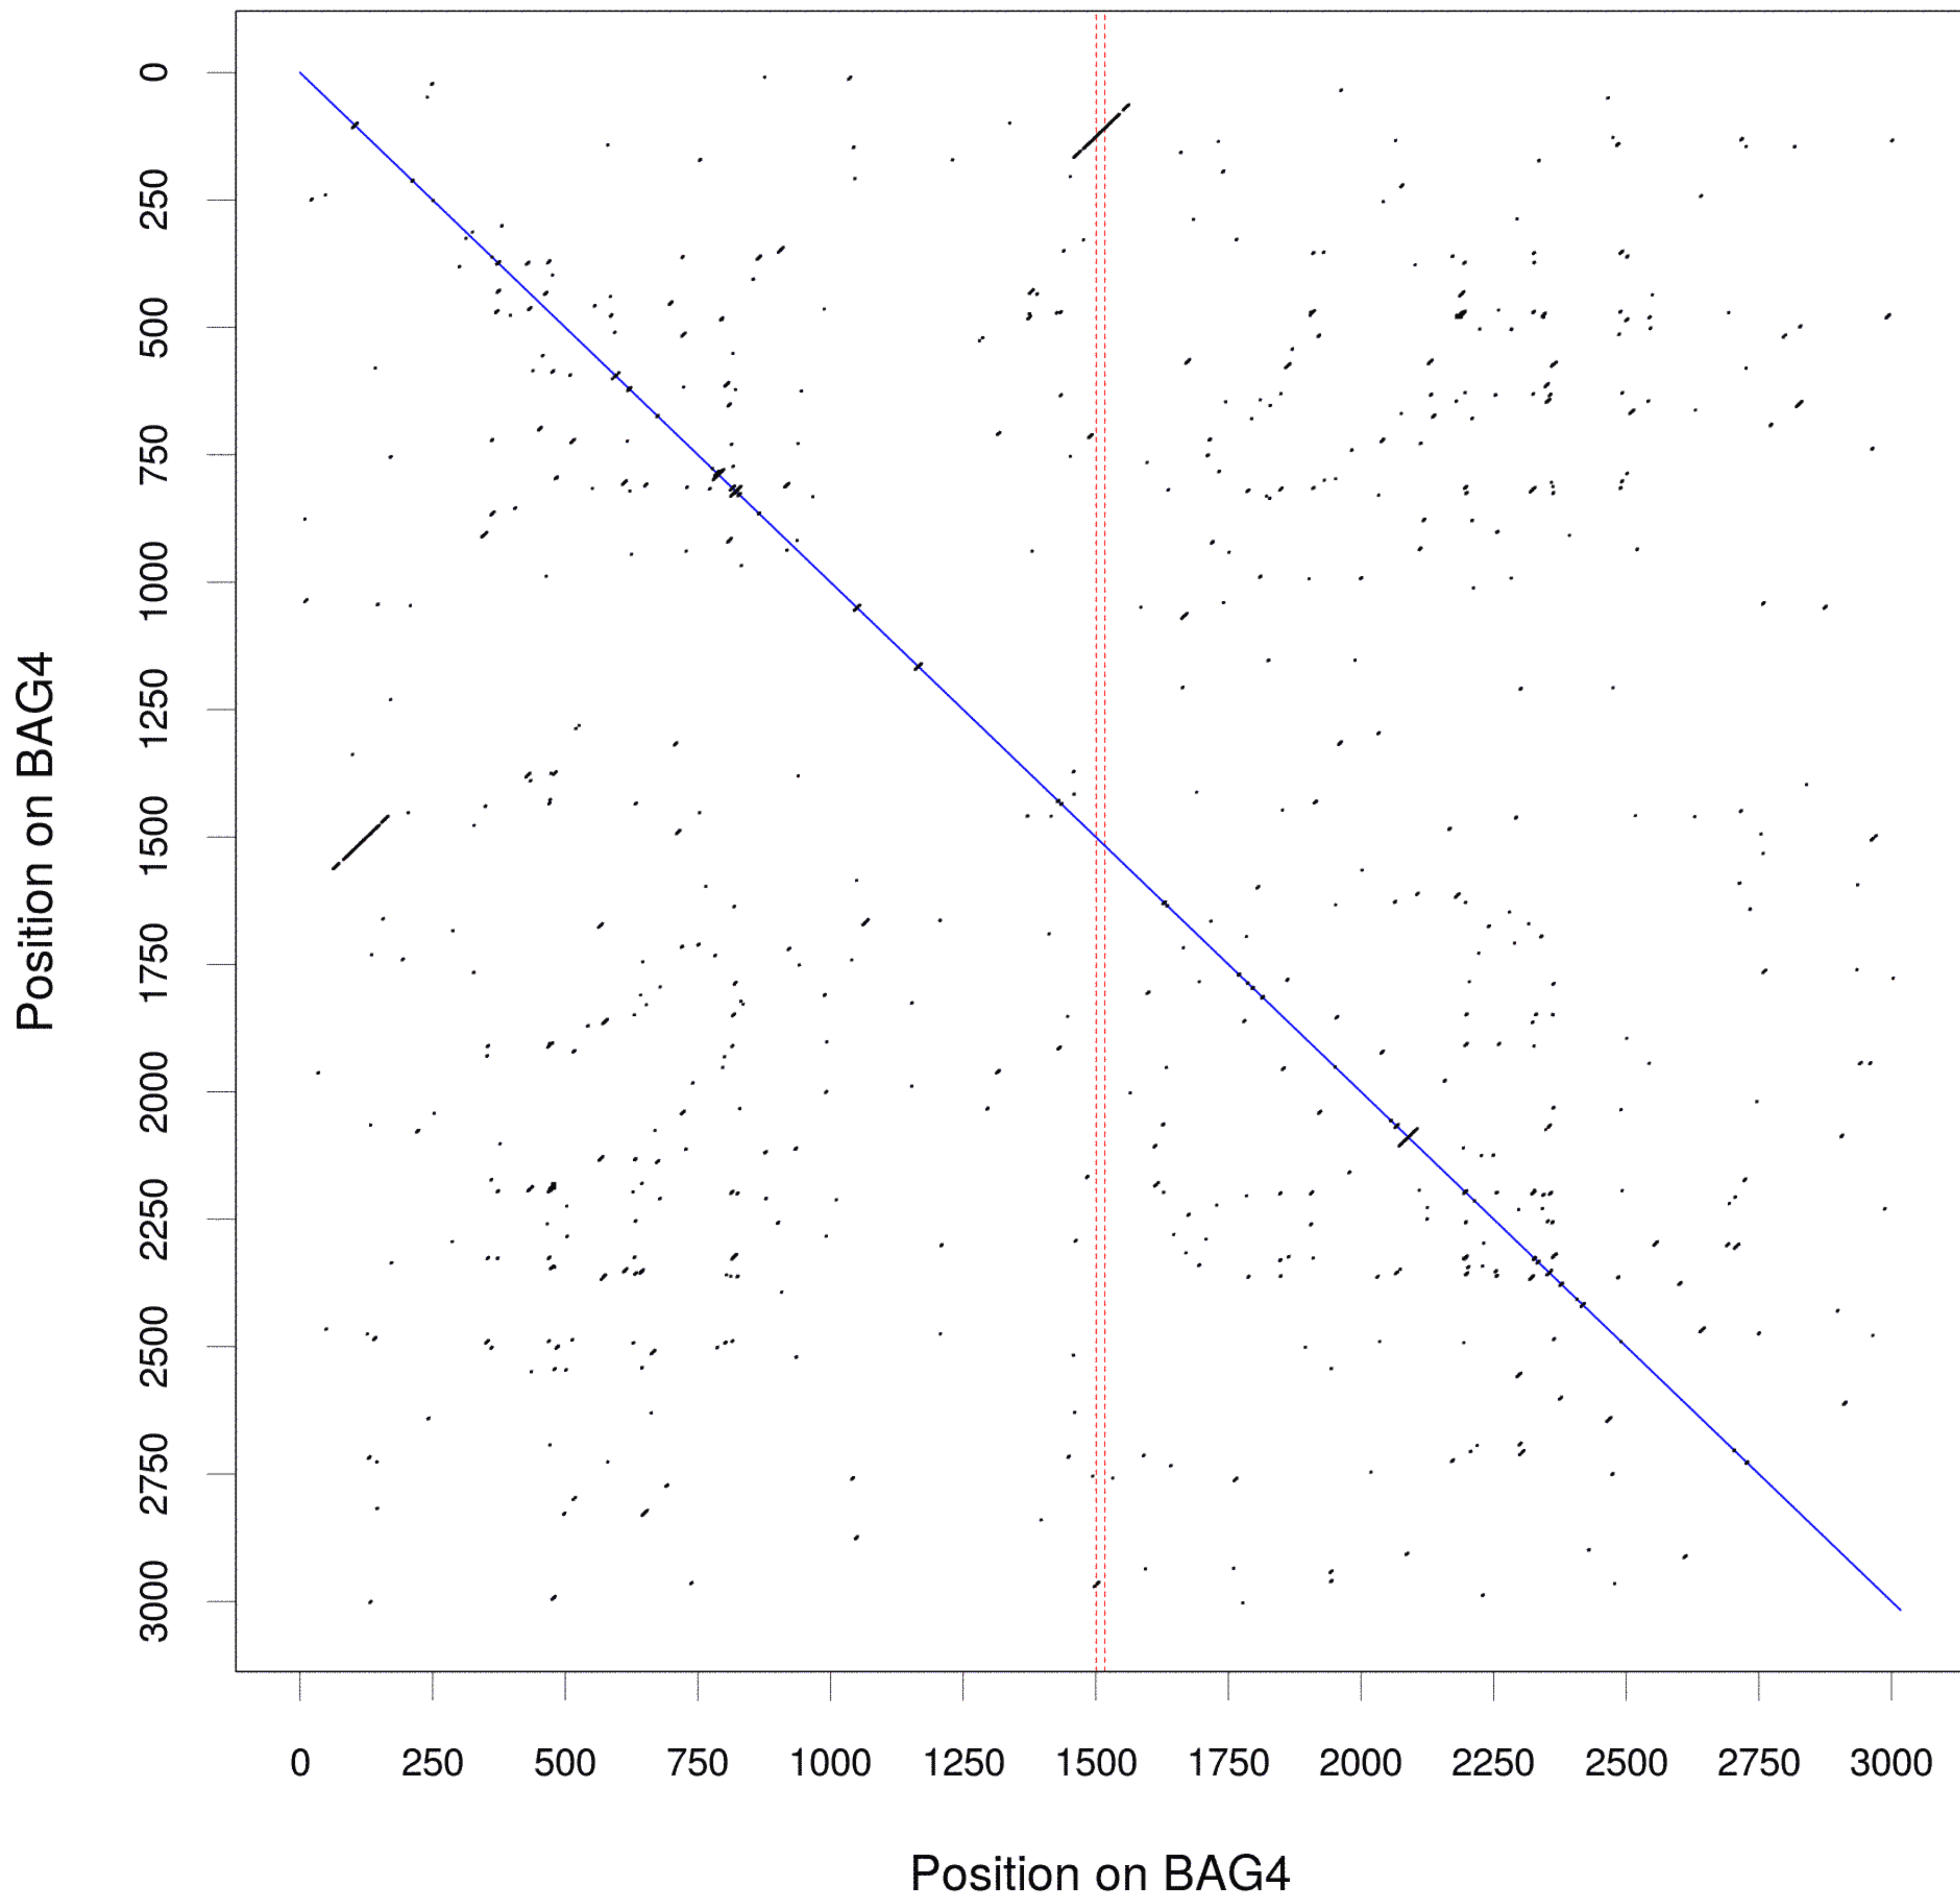

# BIRC3

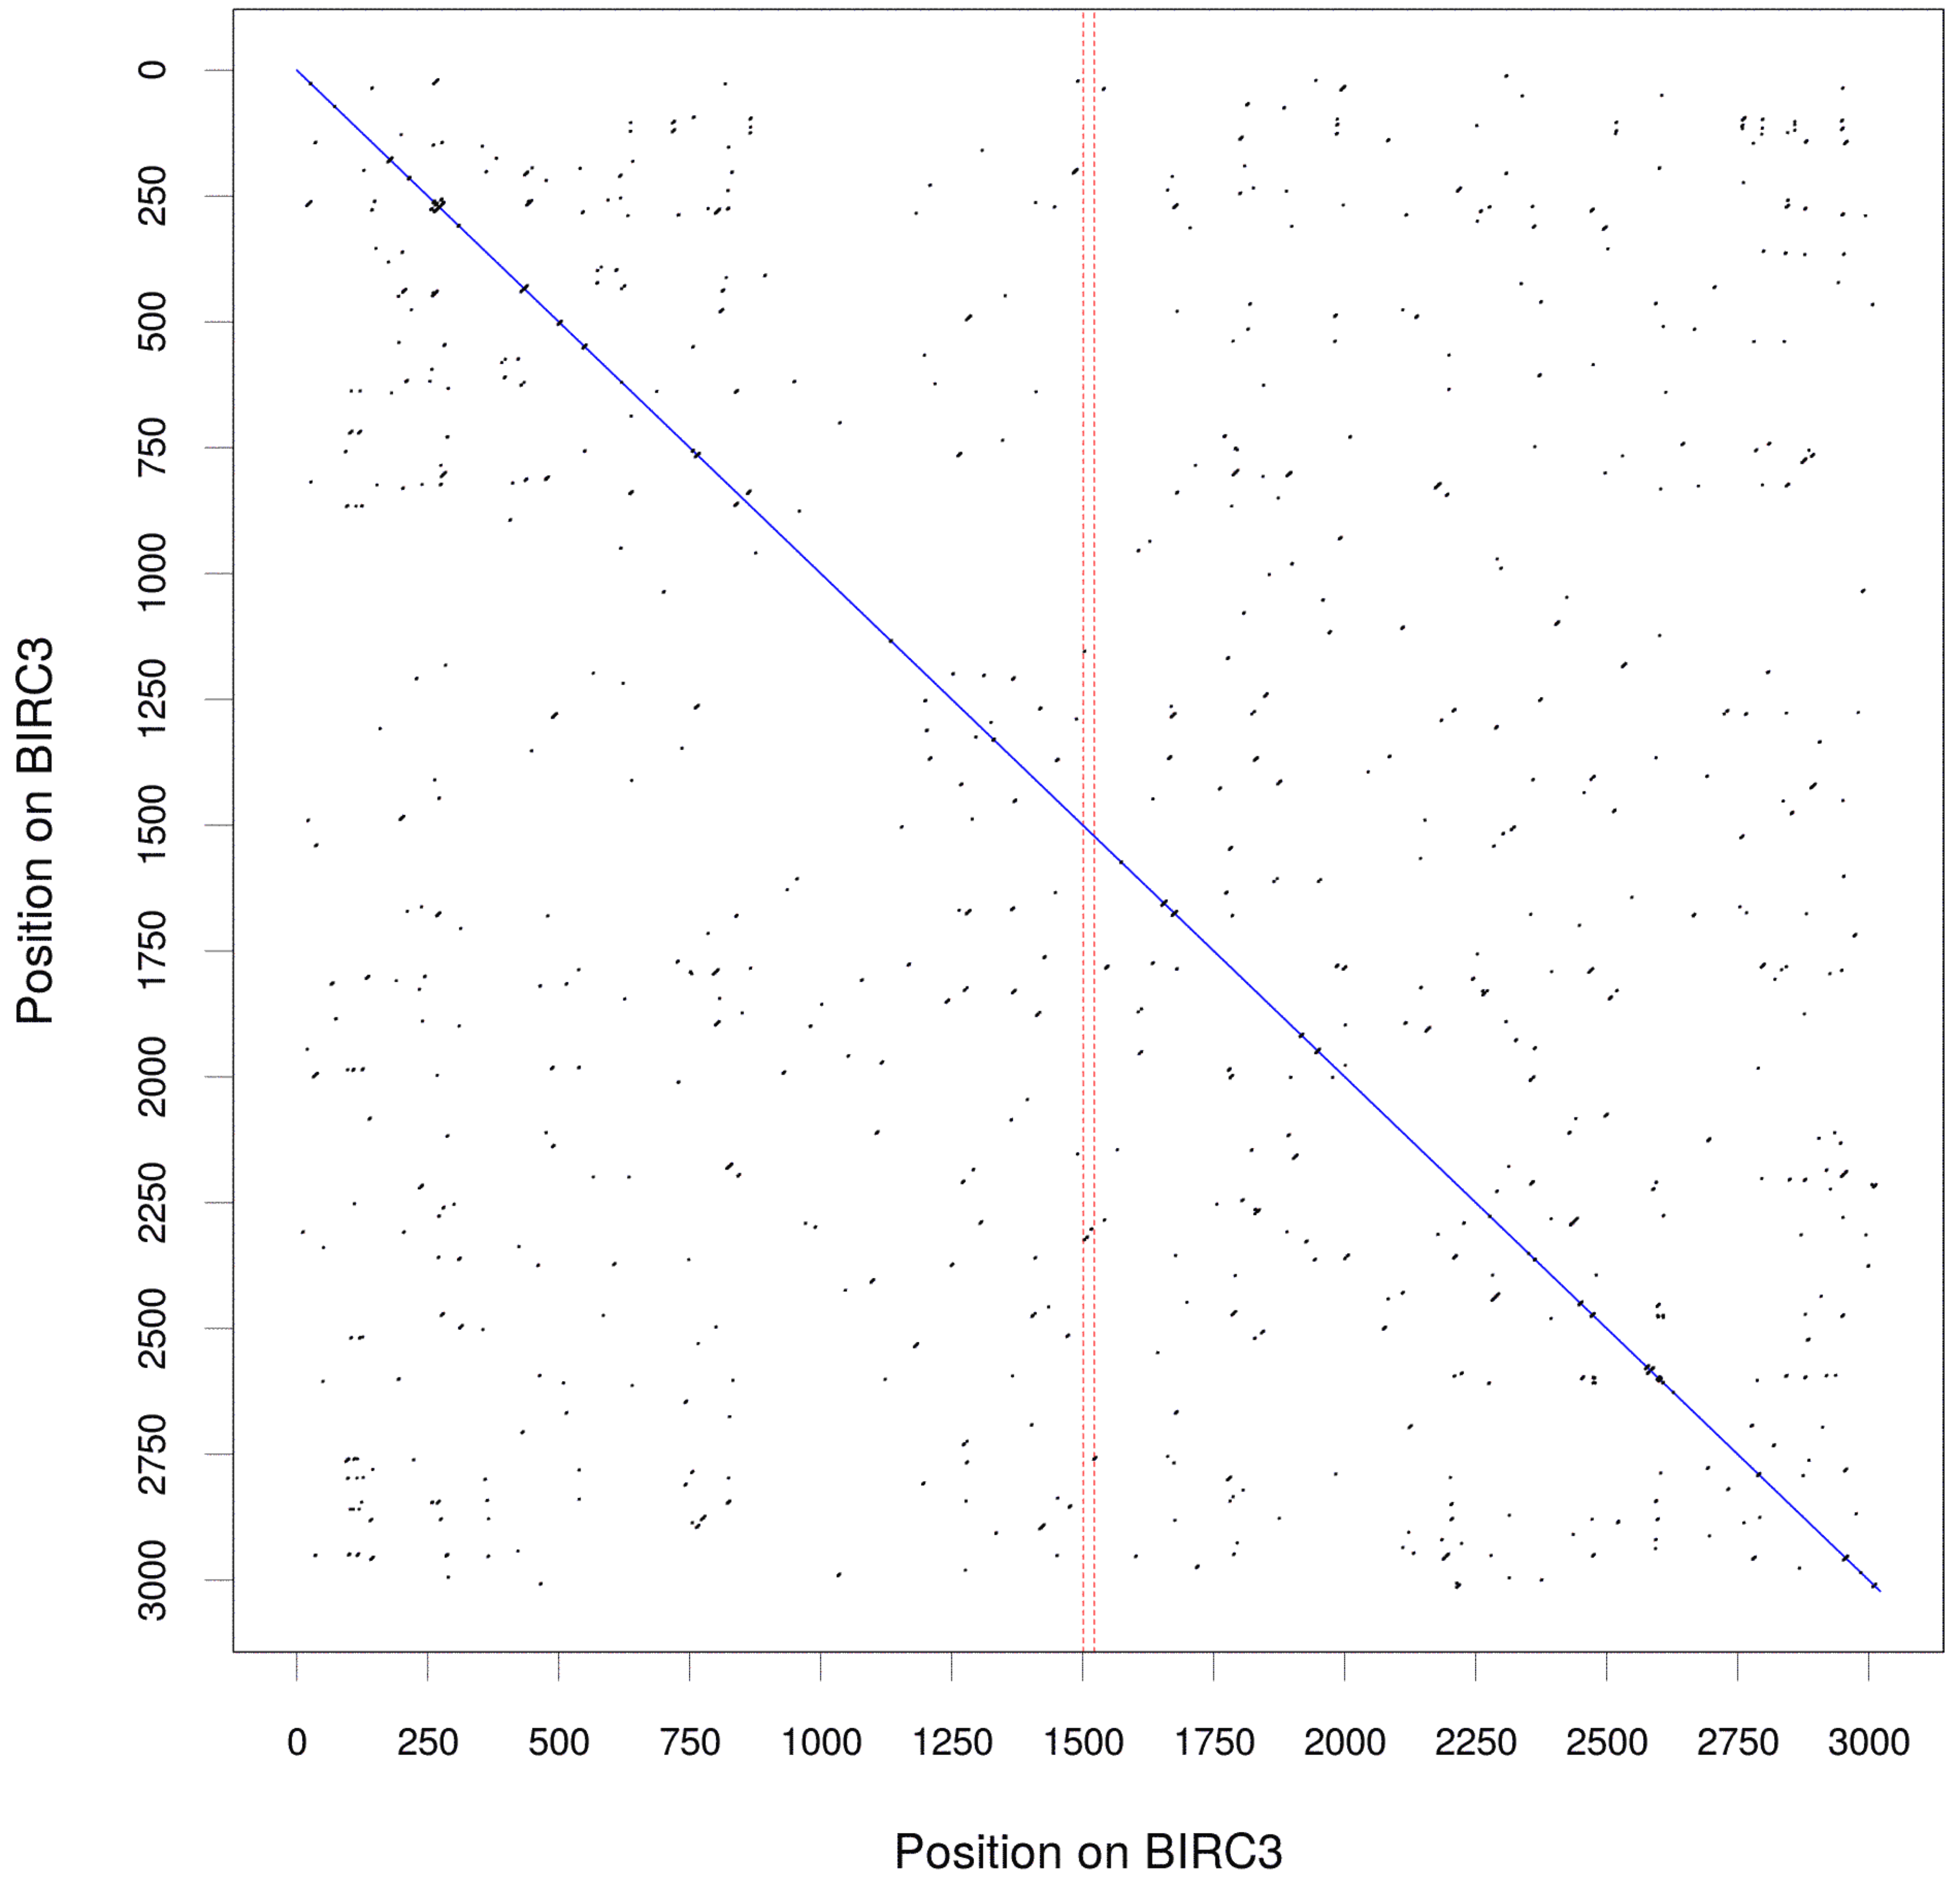

# BLCAP

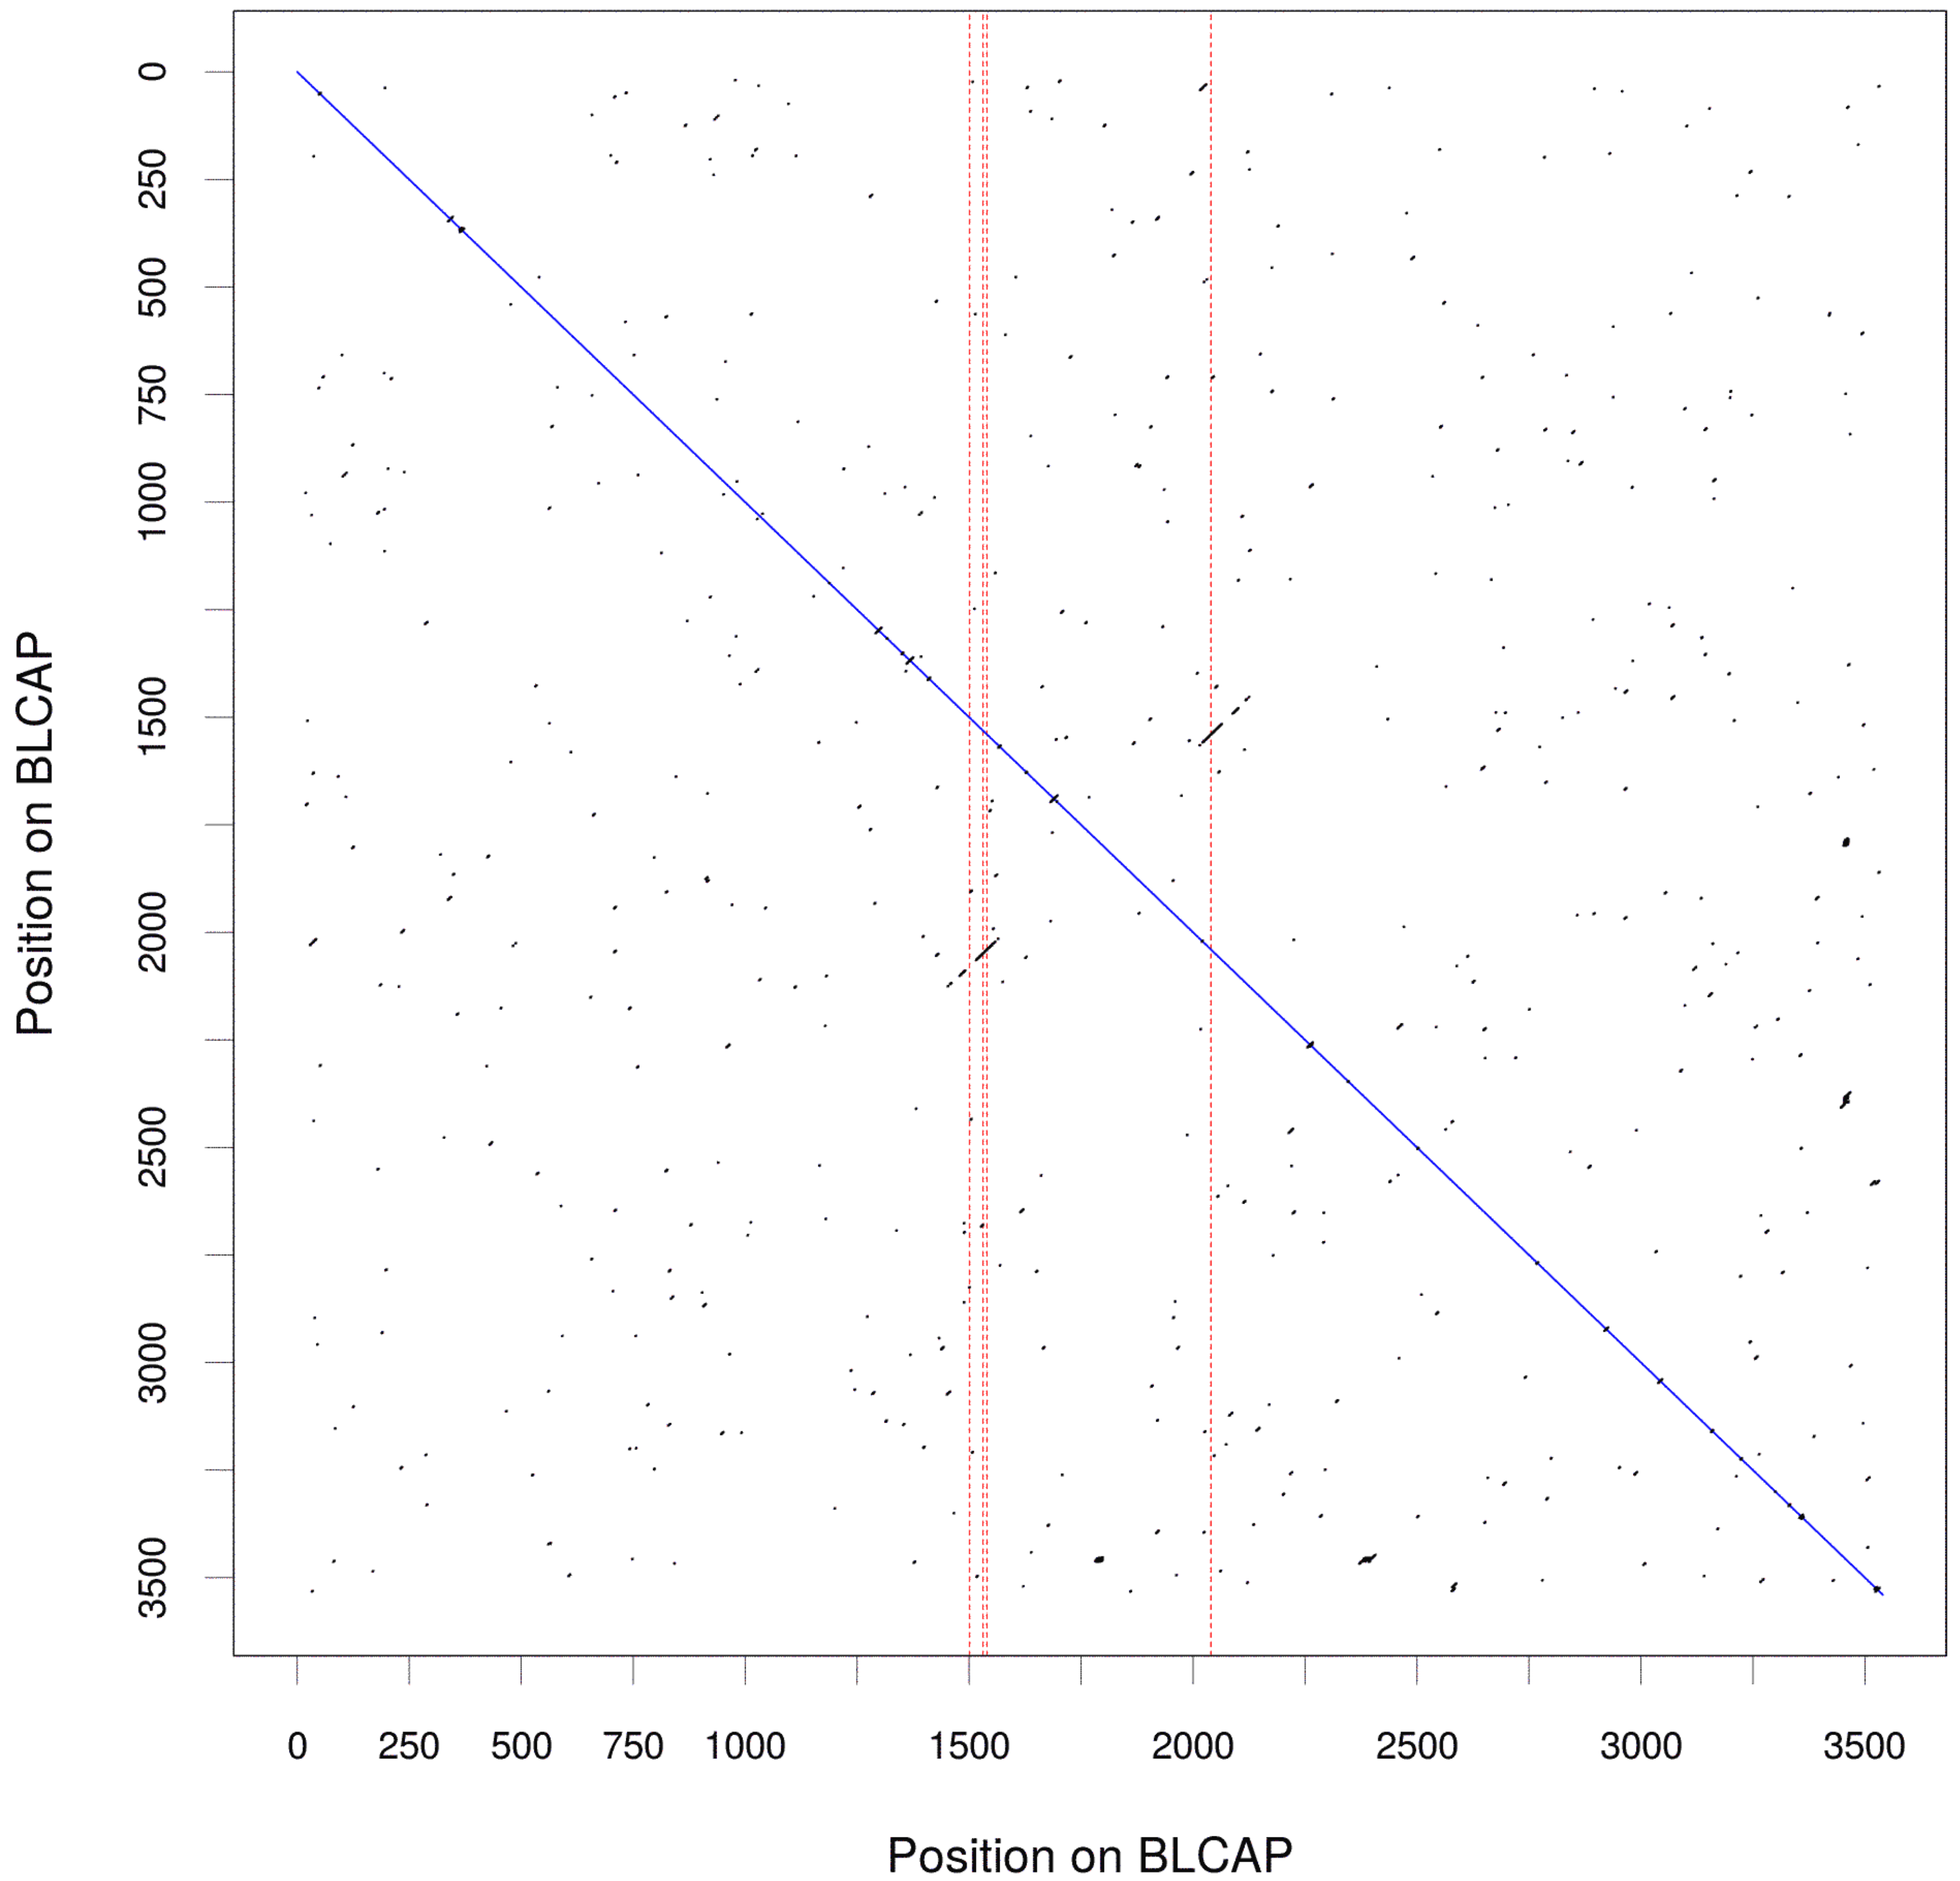

# BLVRA

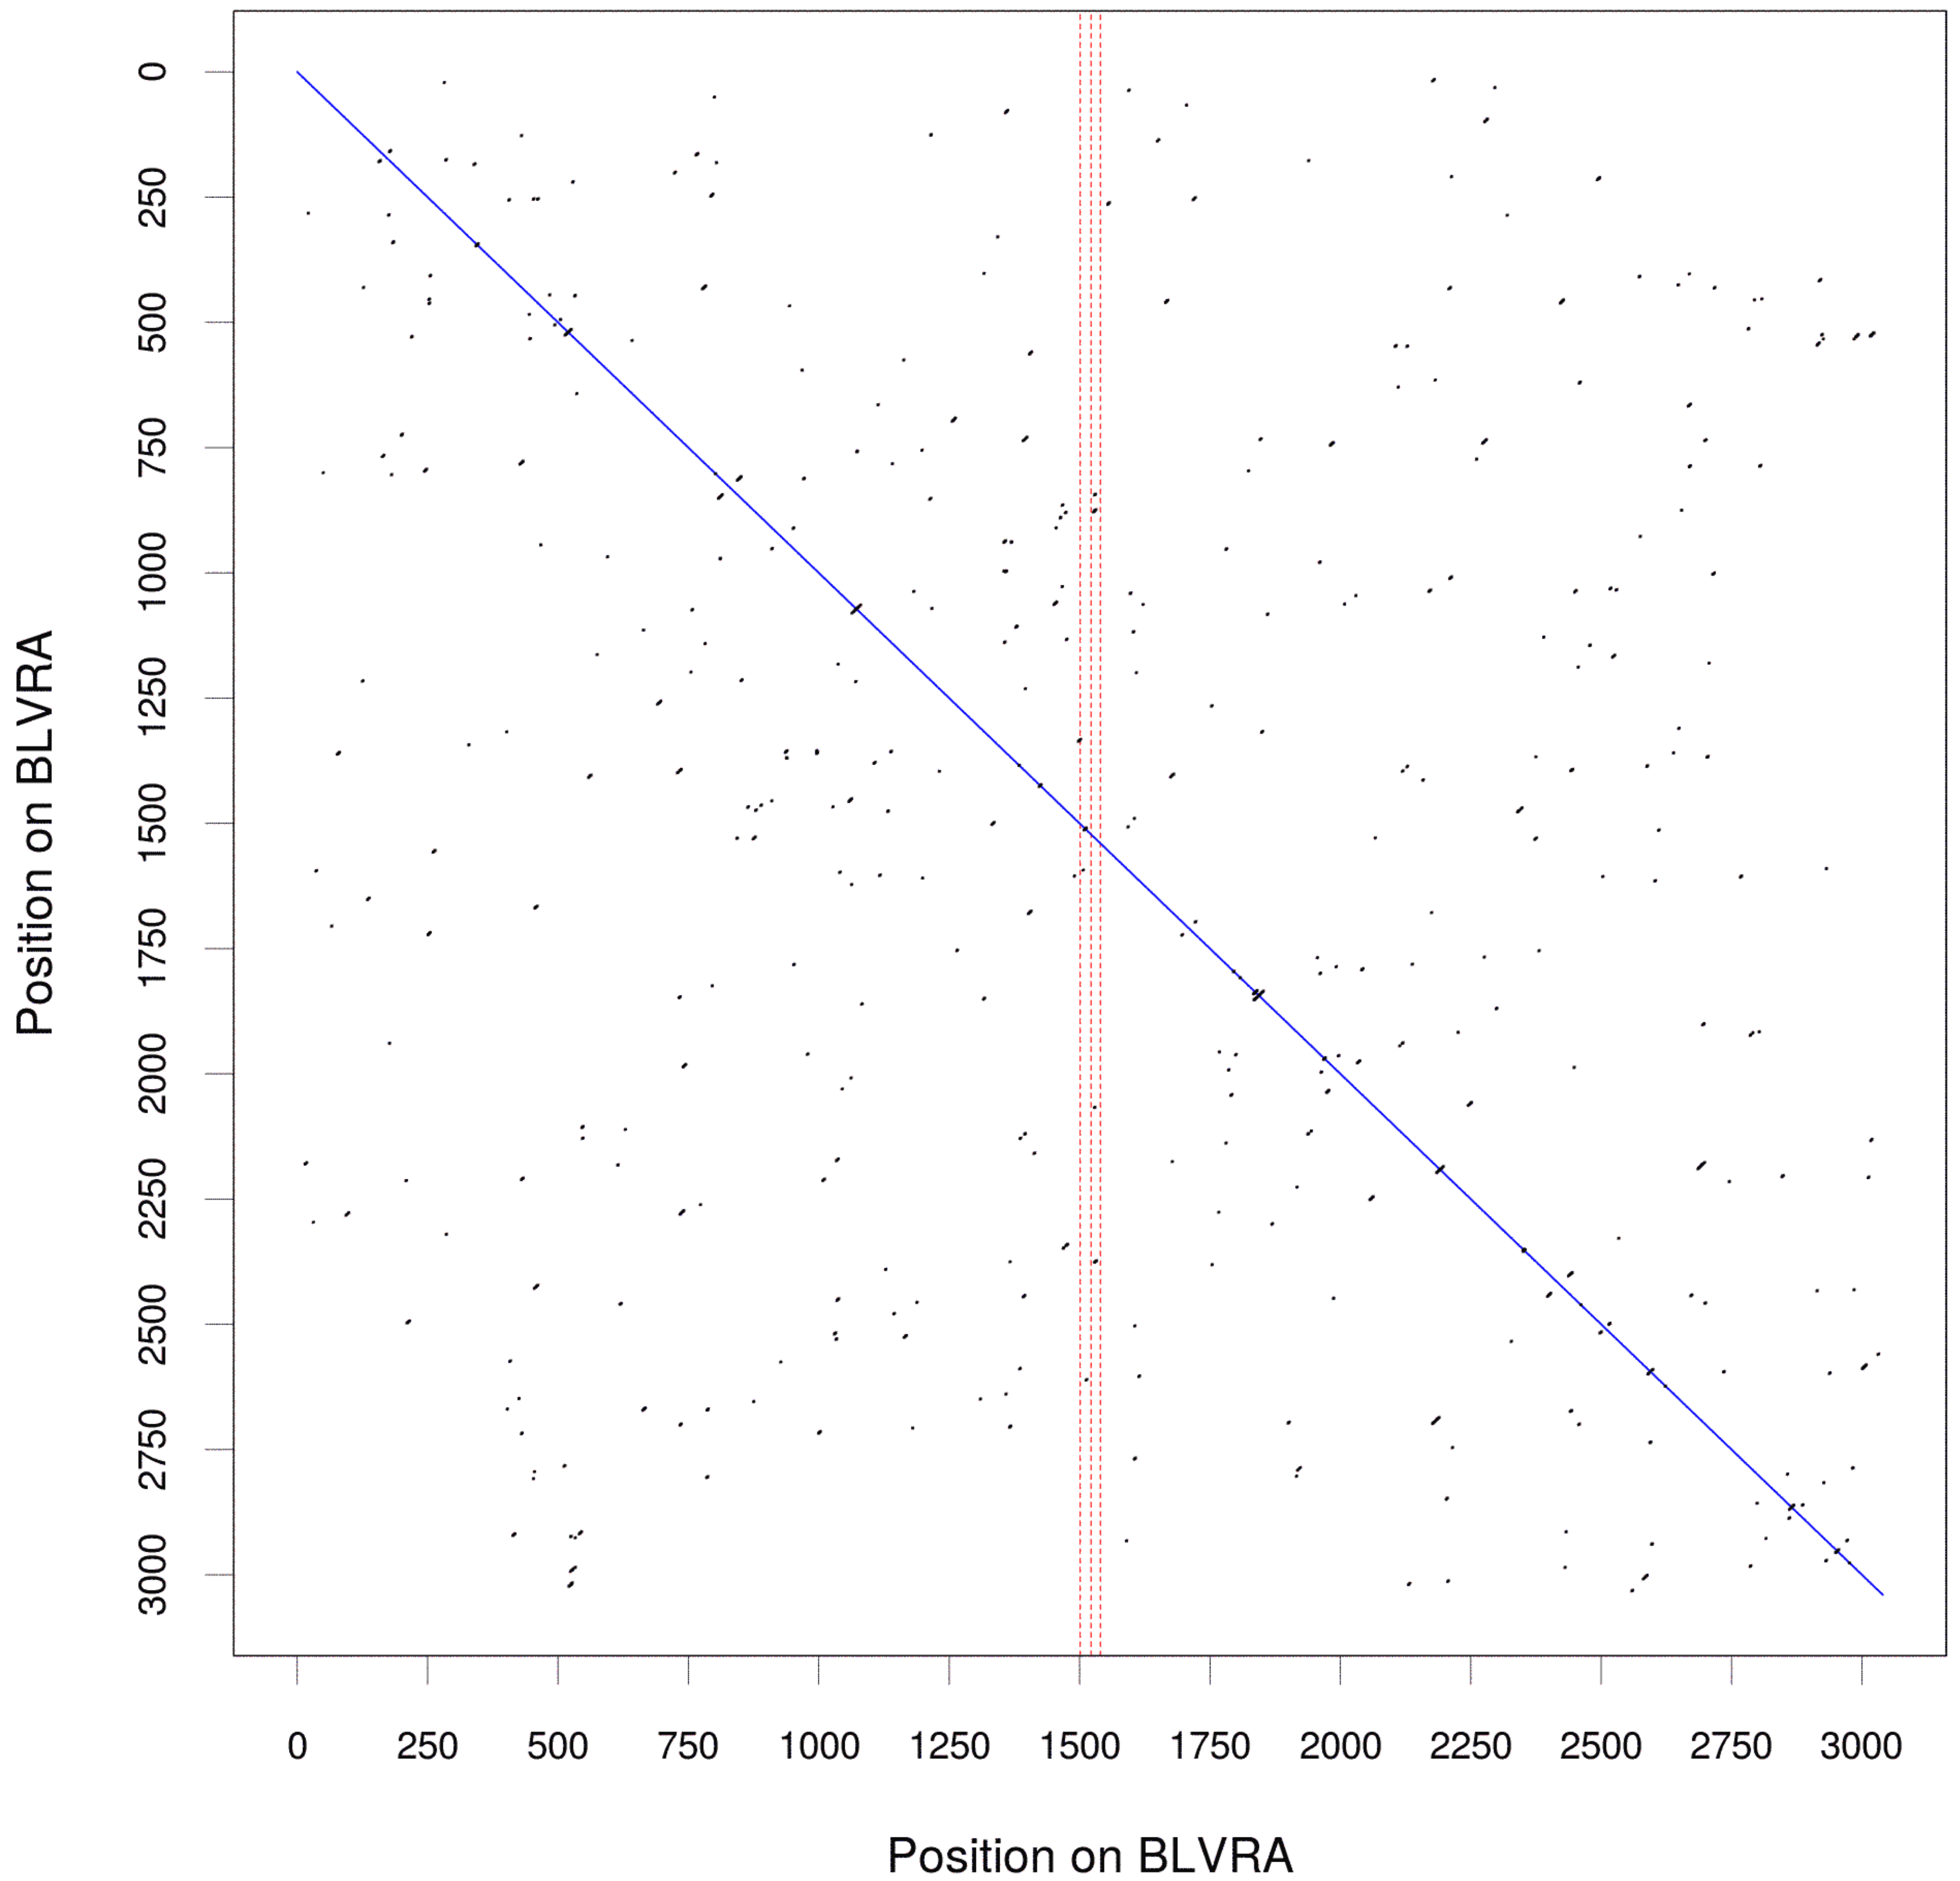

# BSPRY

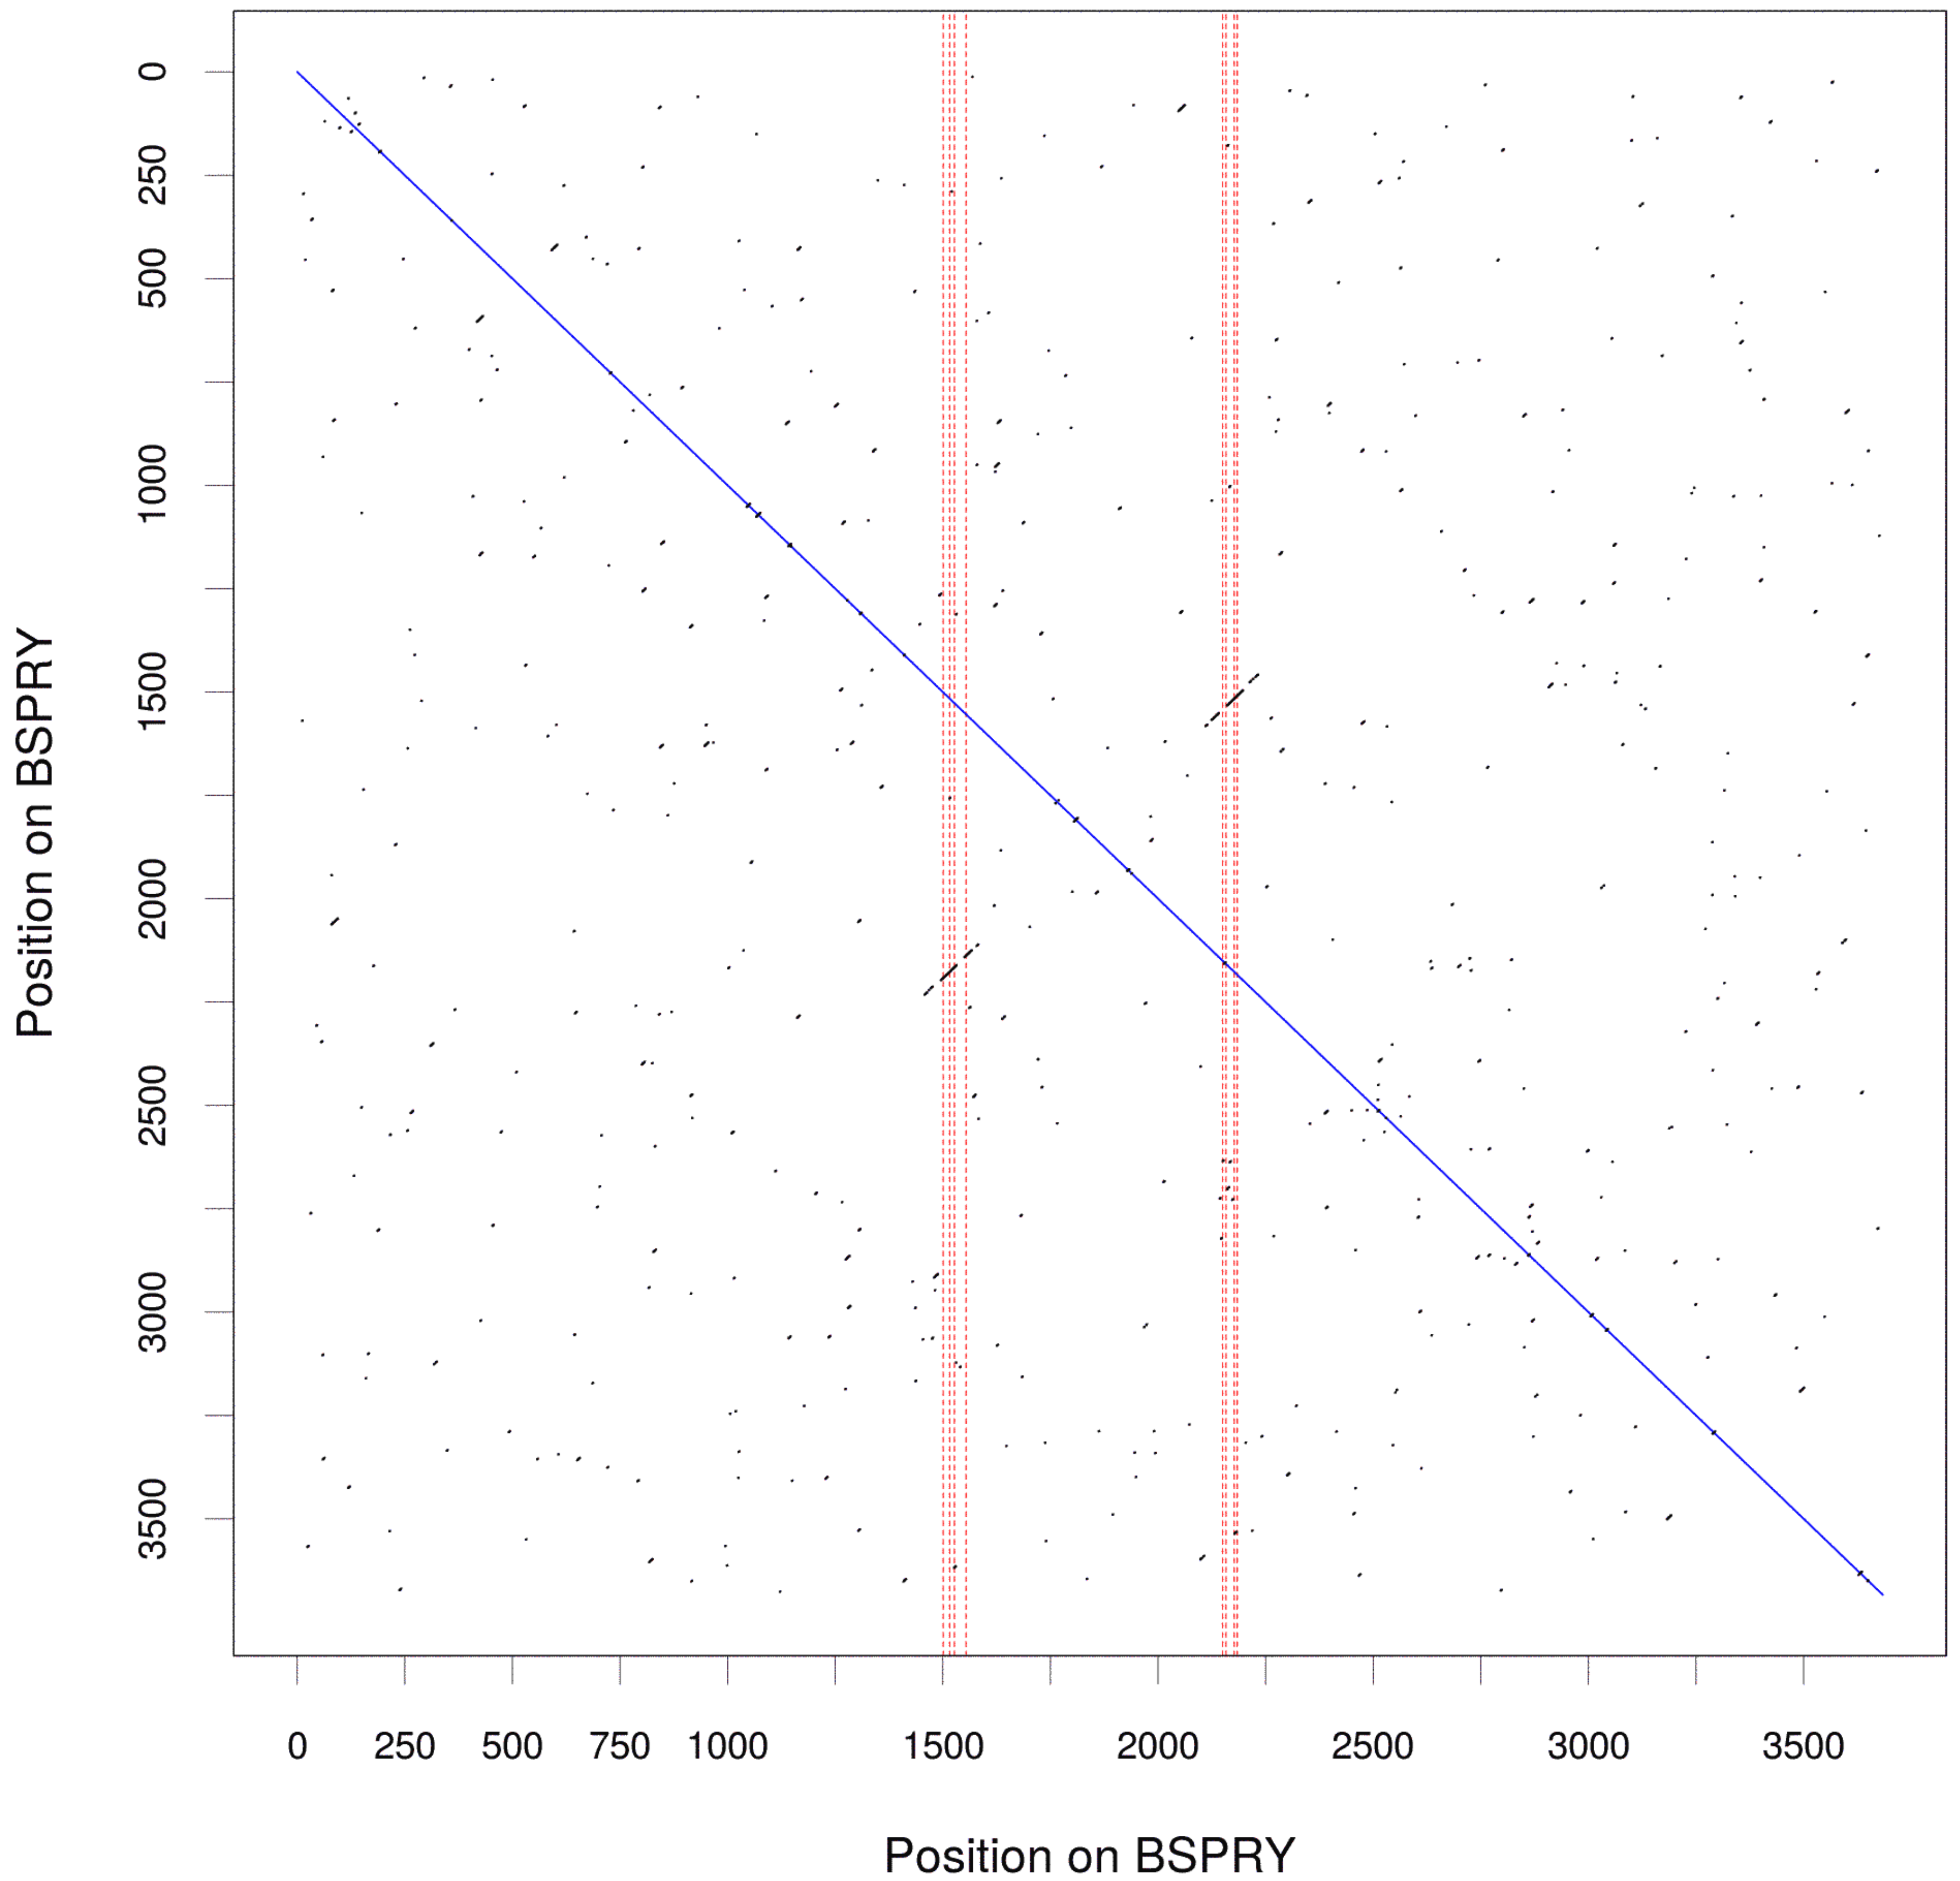



# C1H21orf59

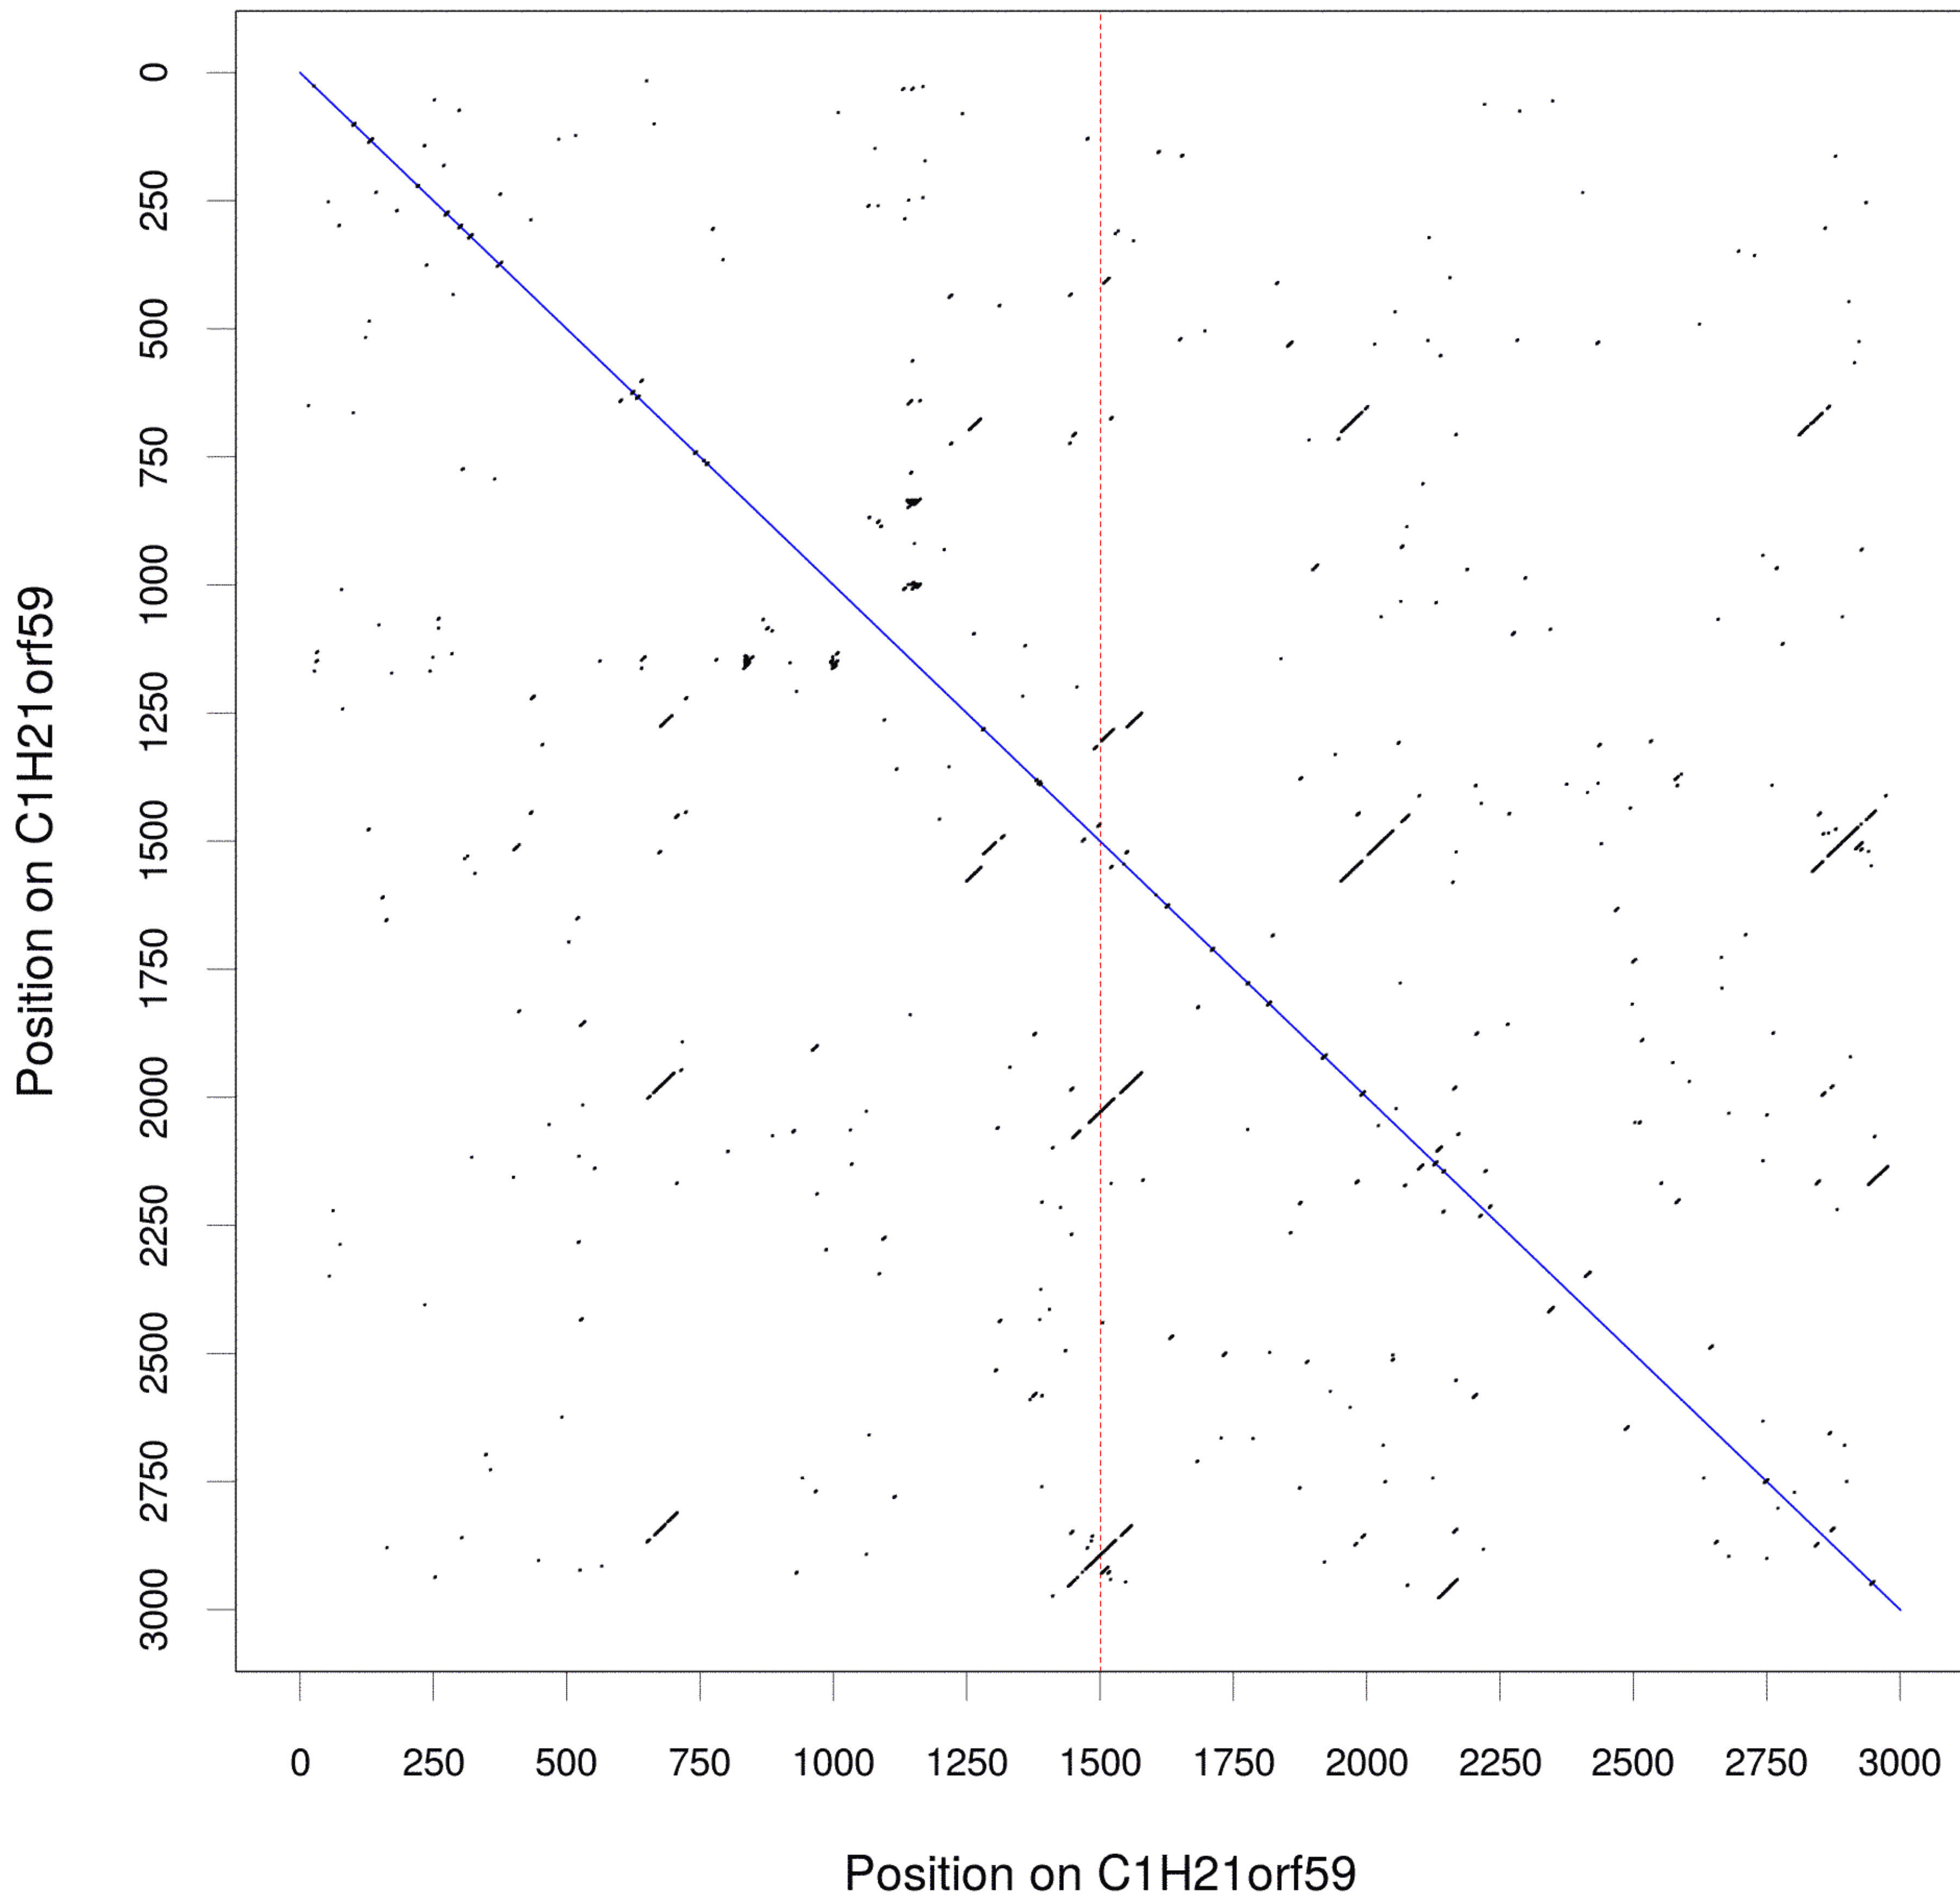

# CABIN1

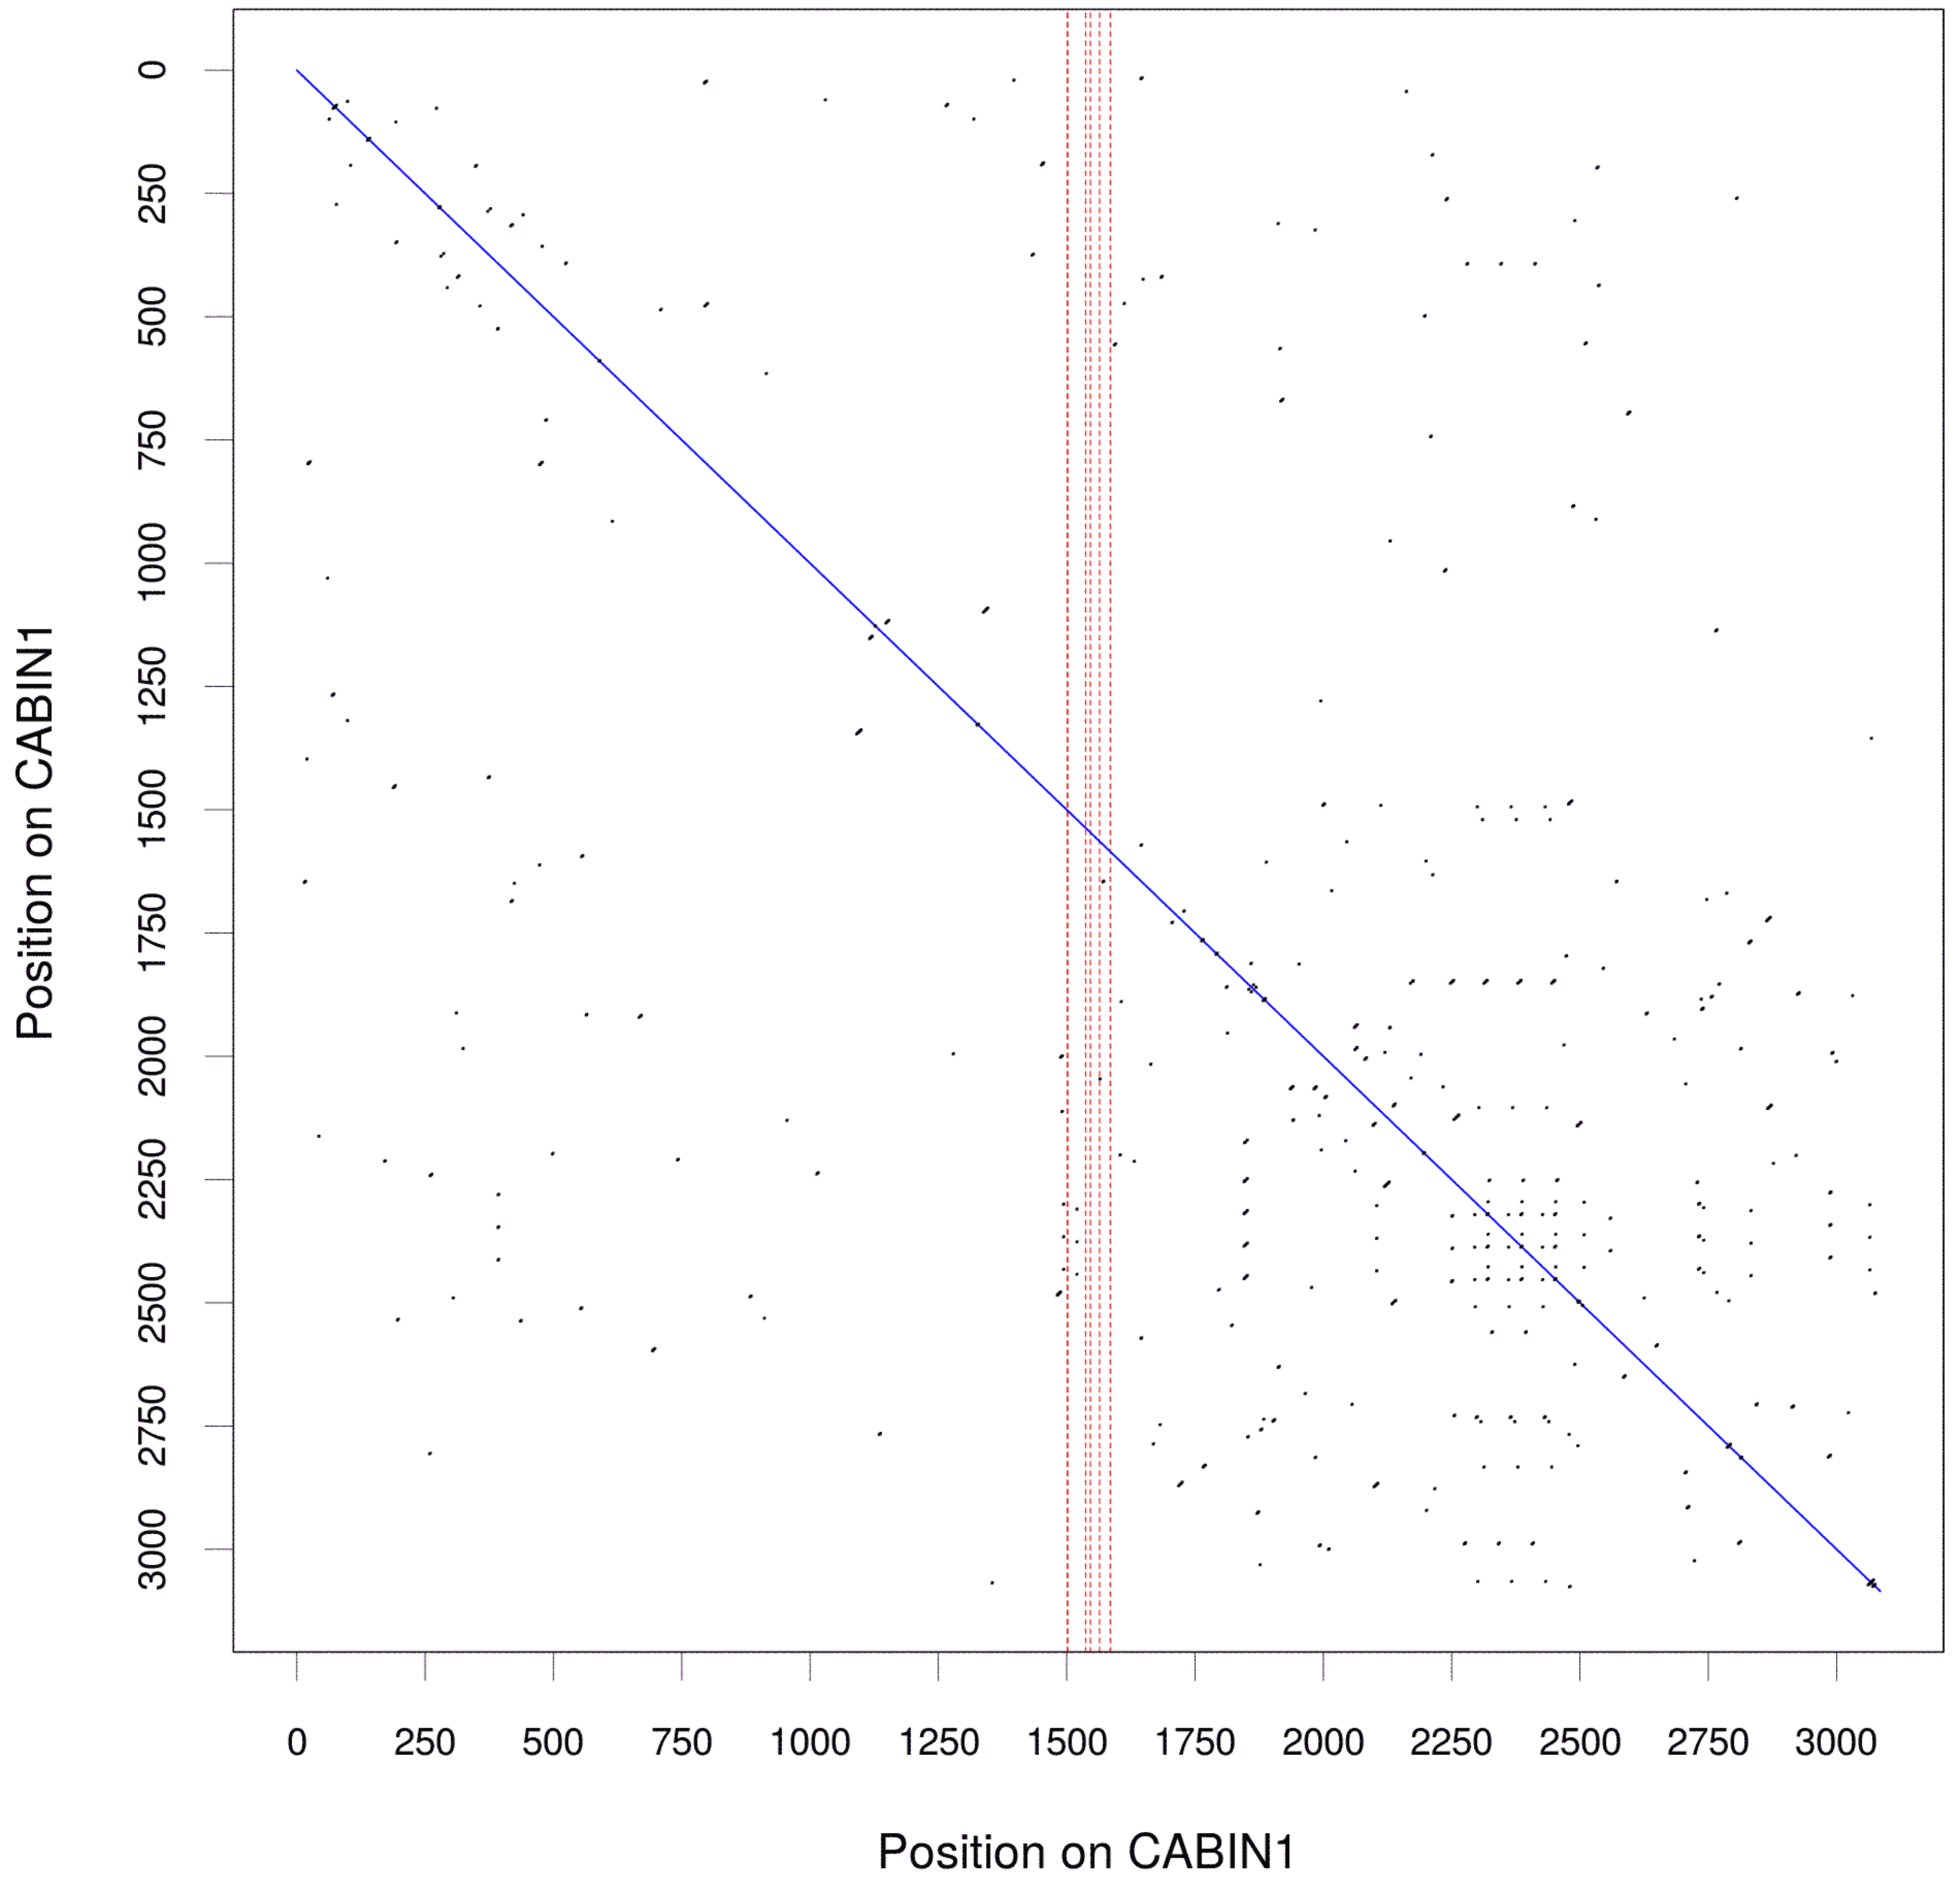

# CALD1

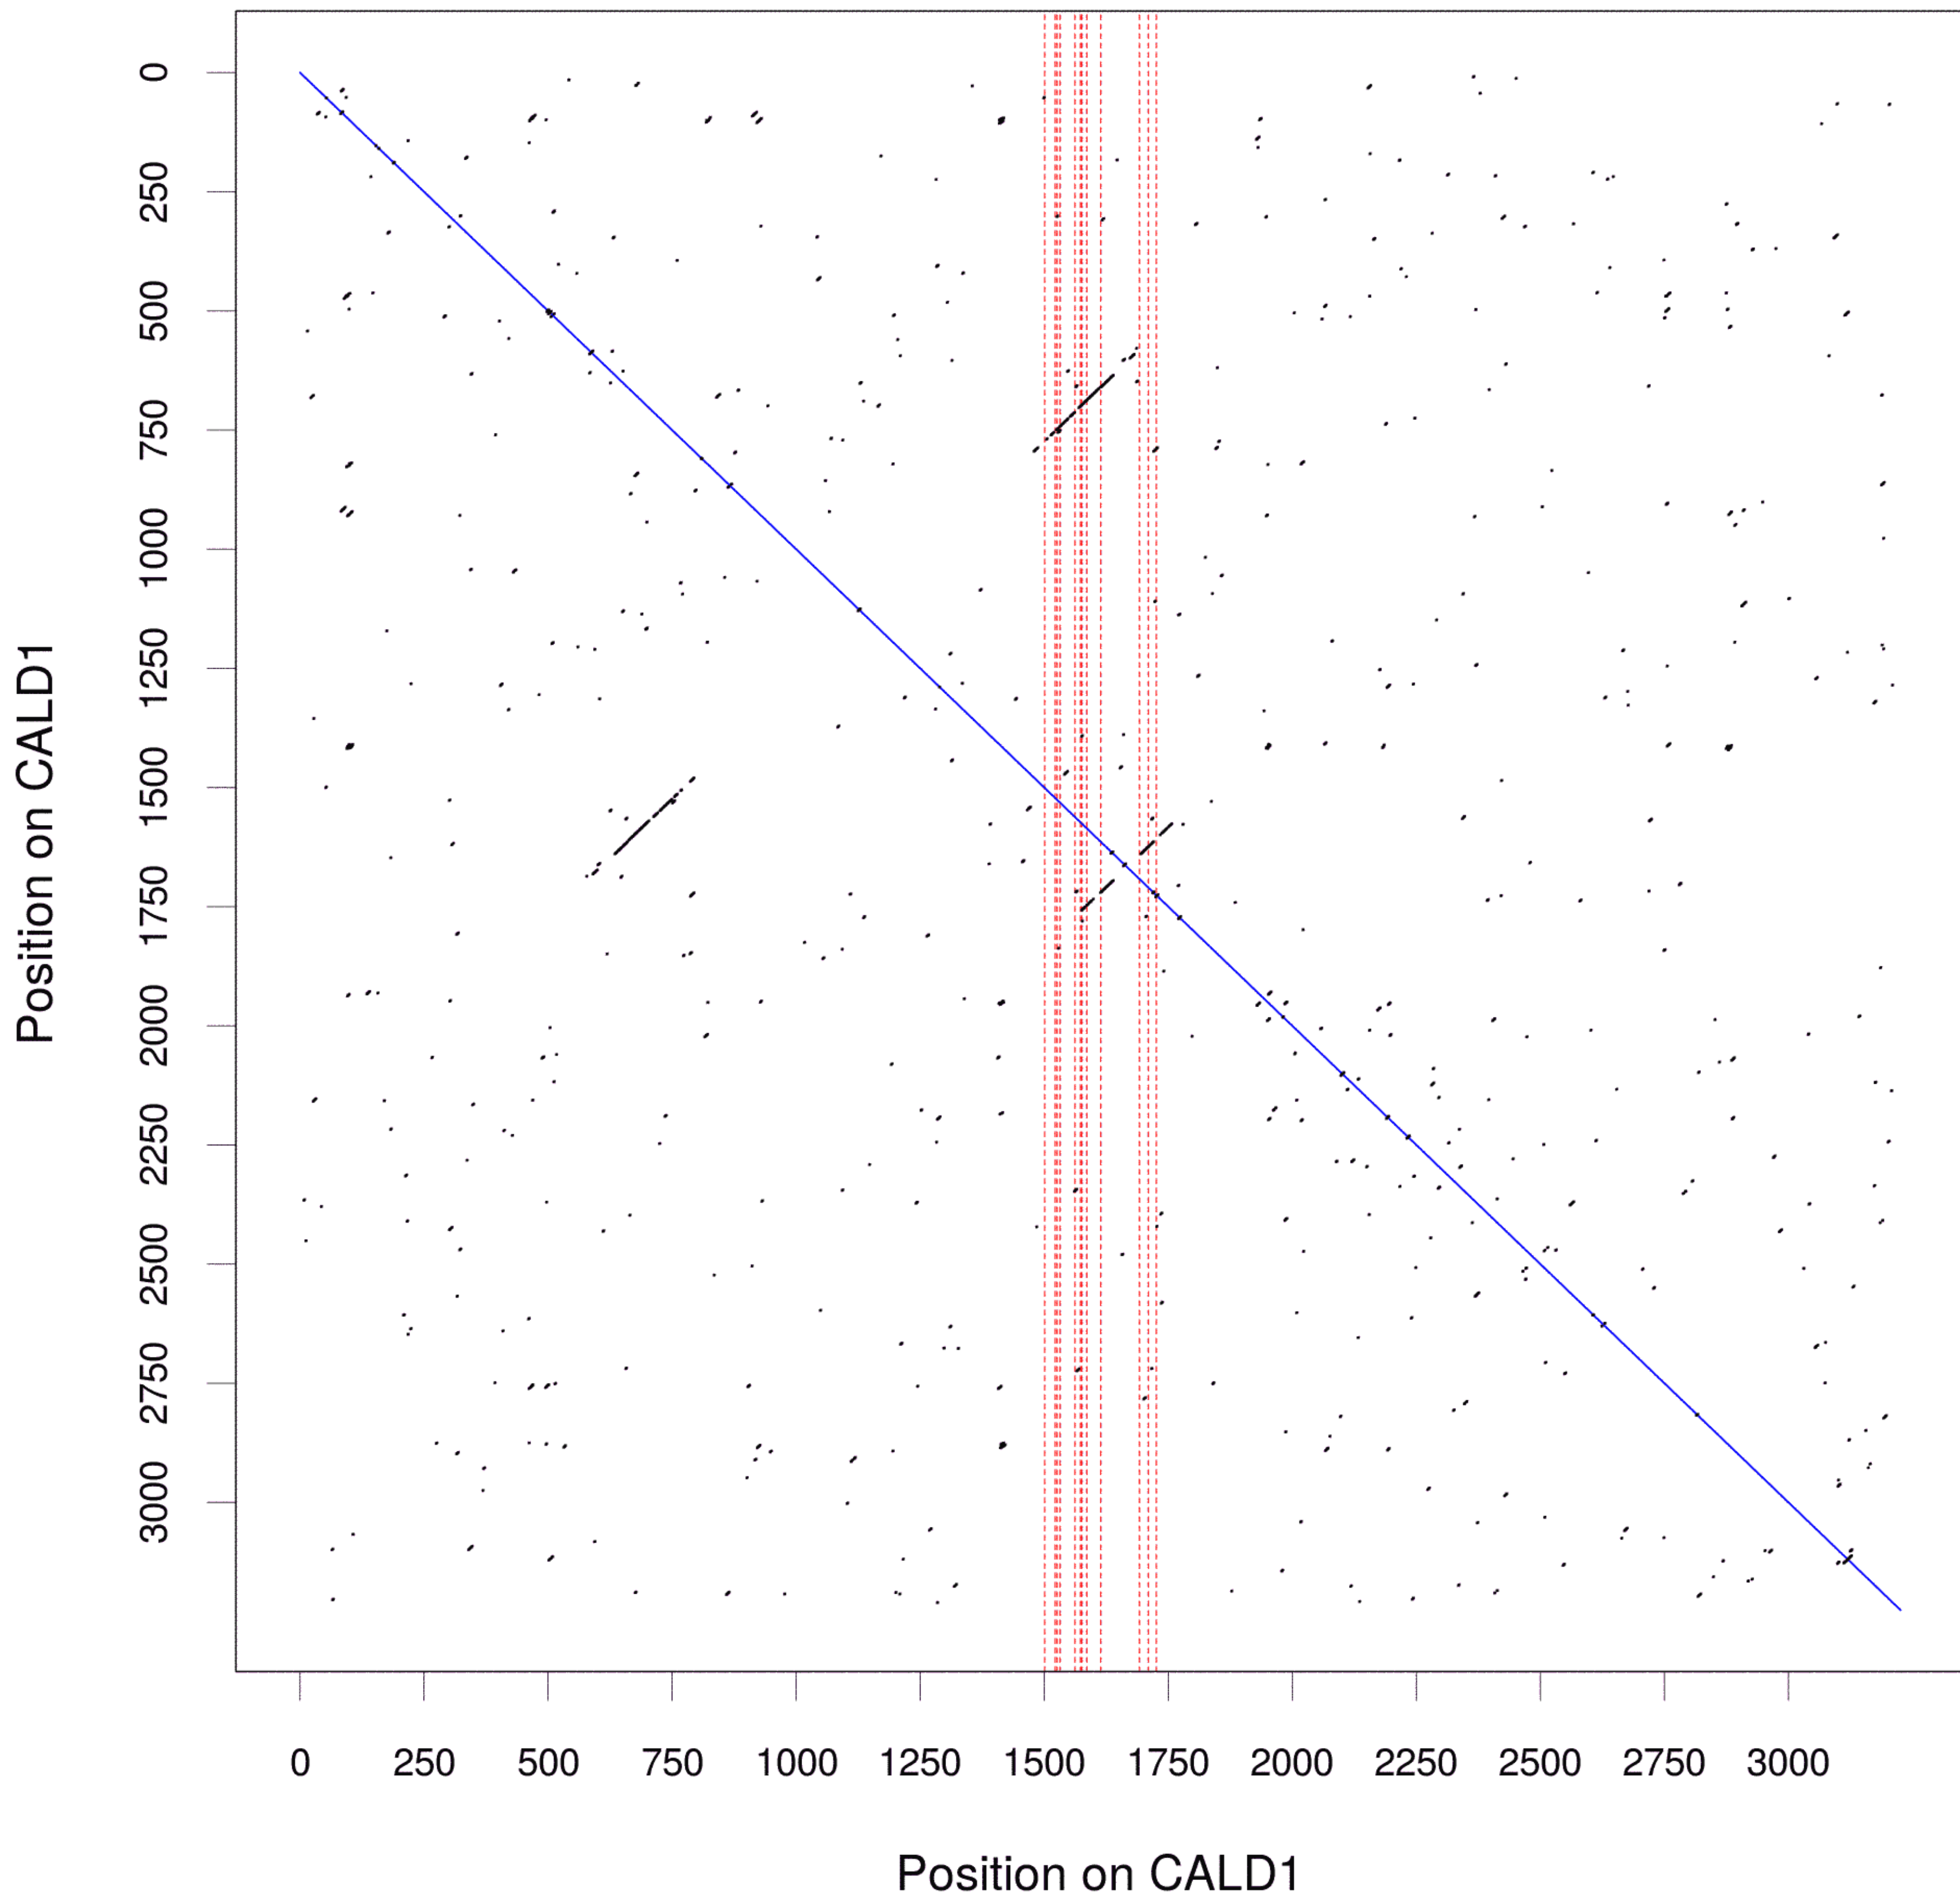

# CAMKK1

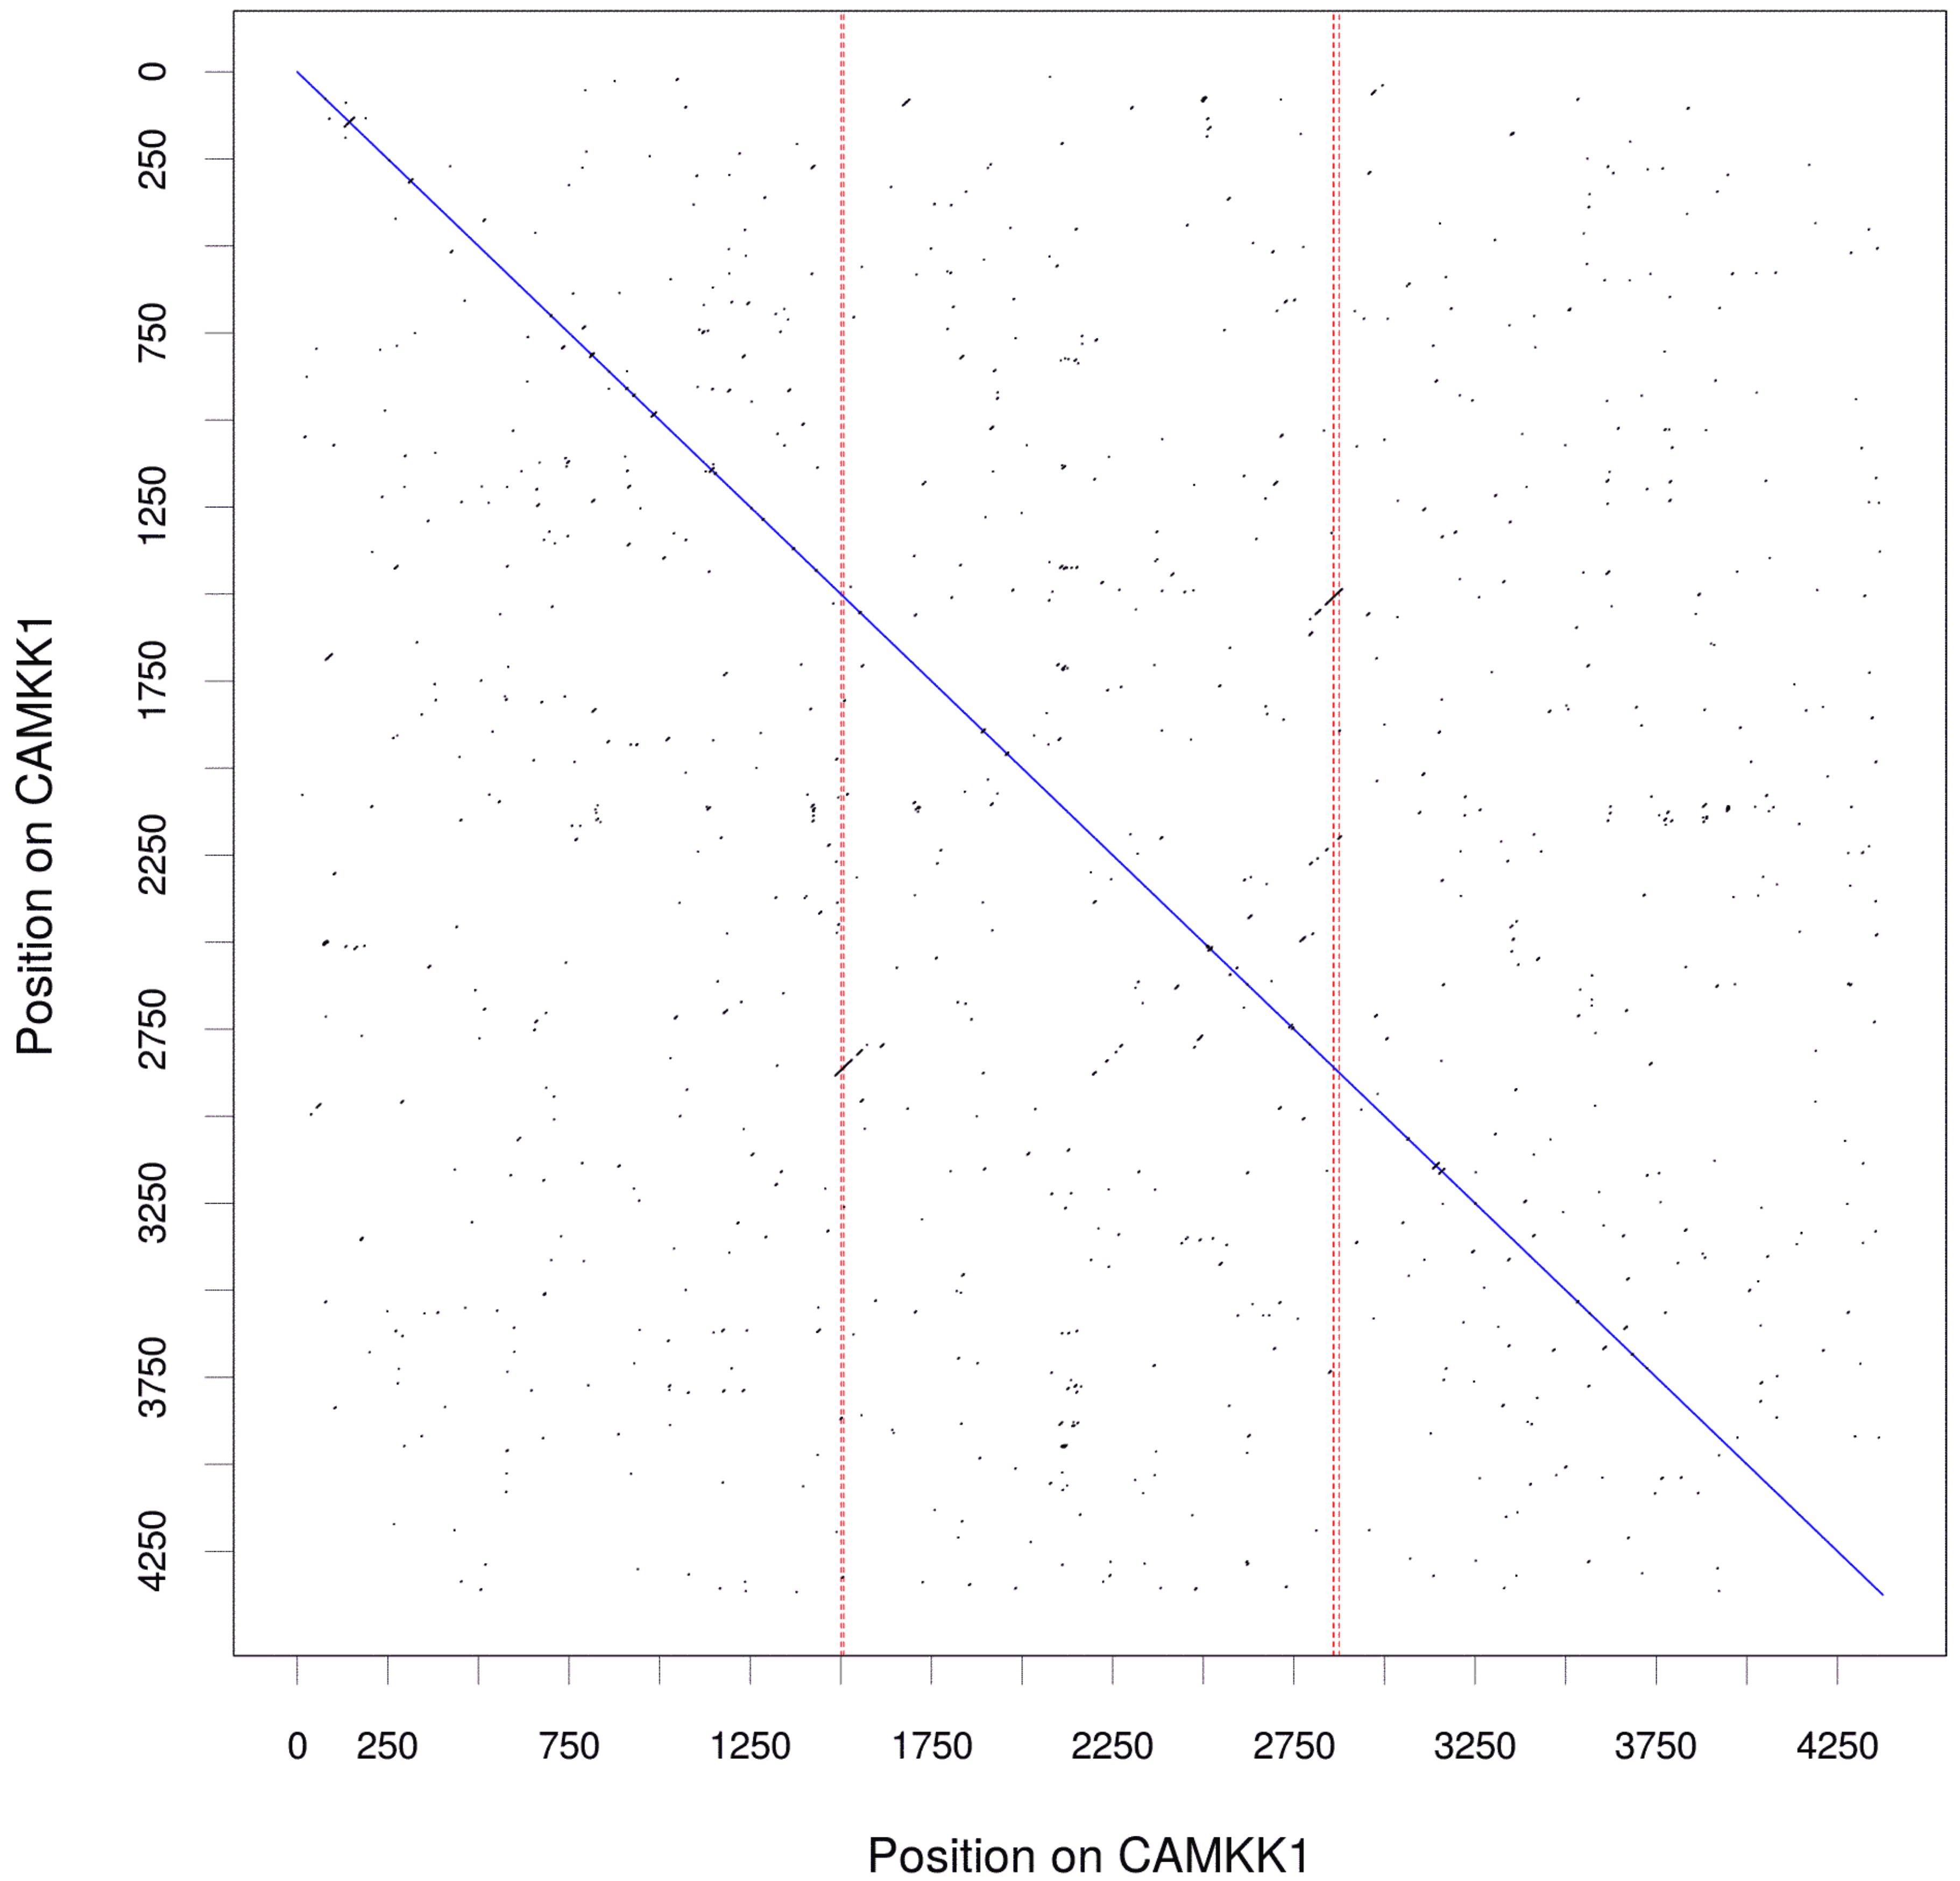

# CAMKK2

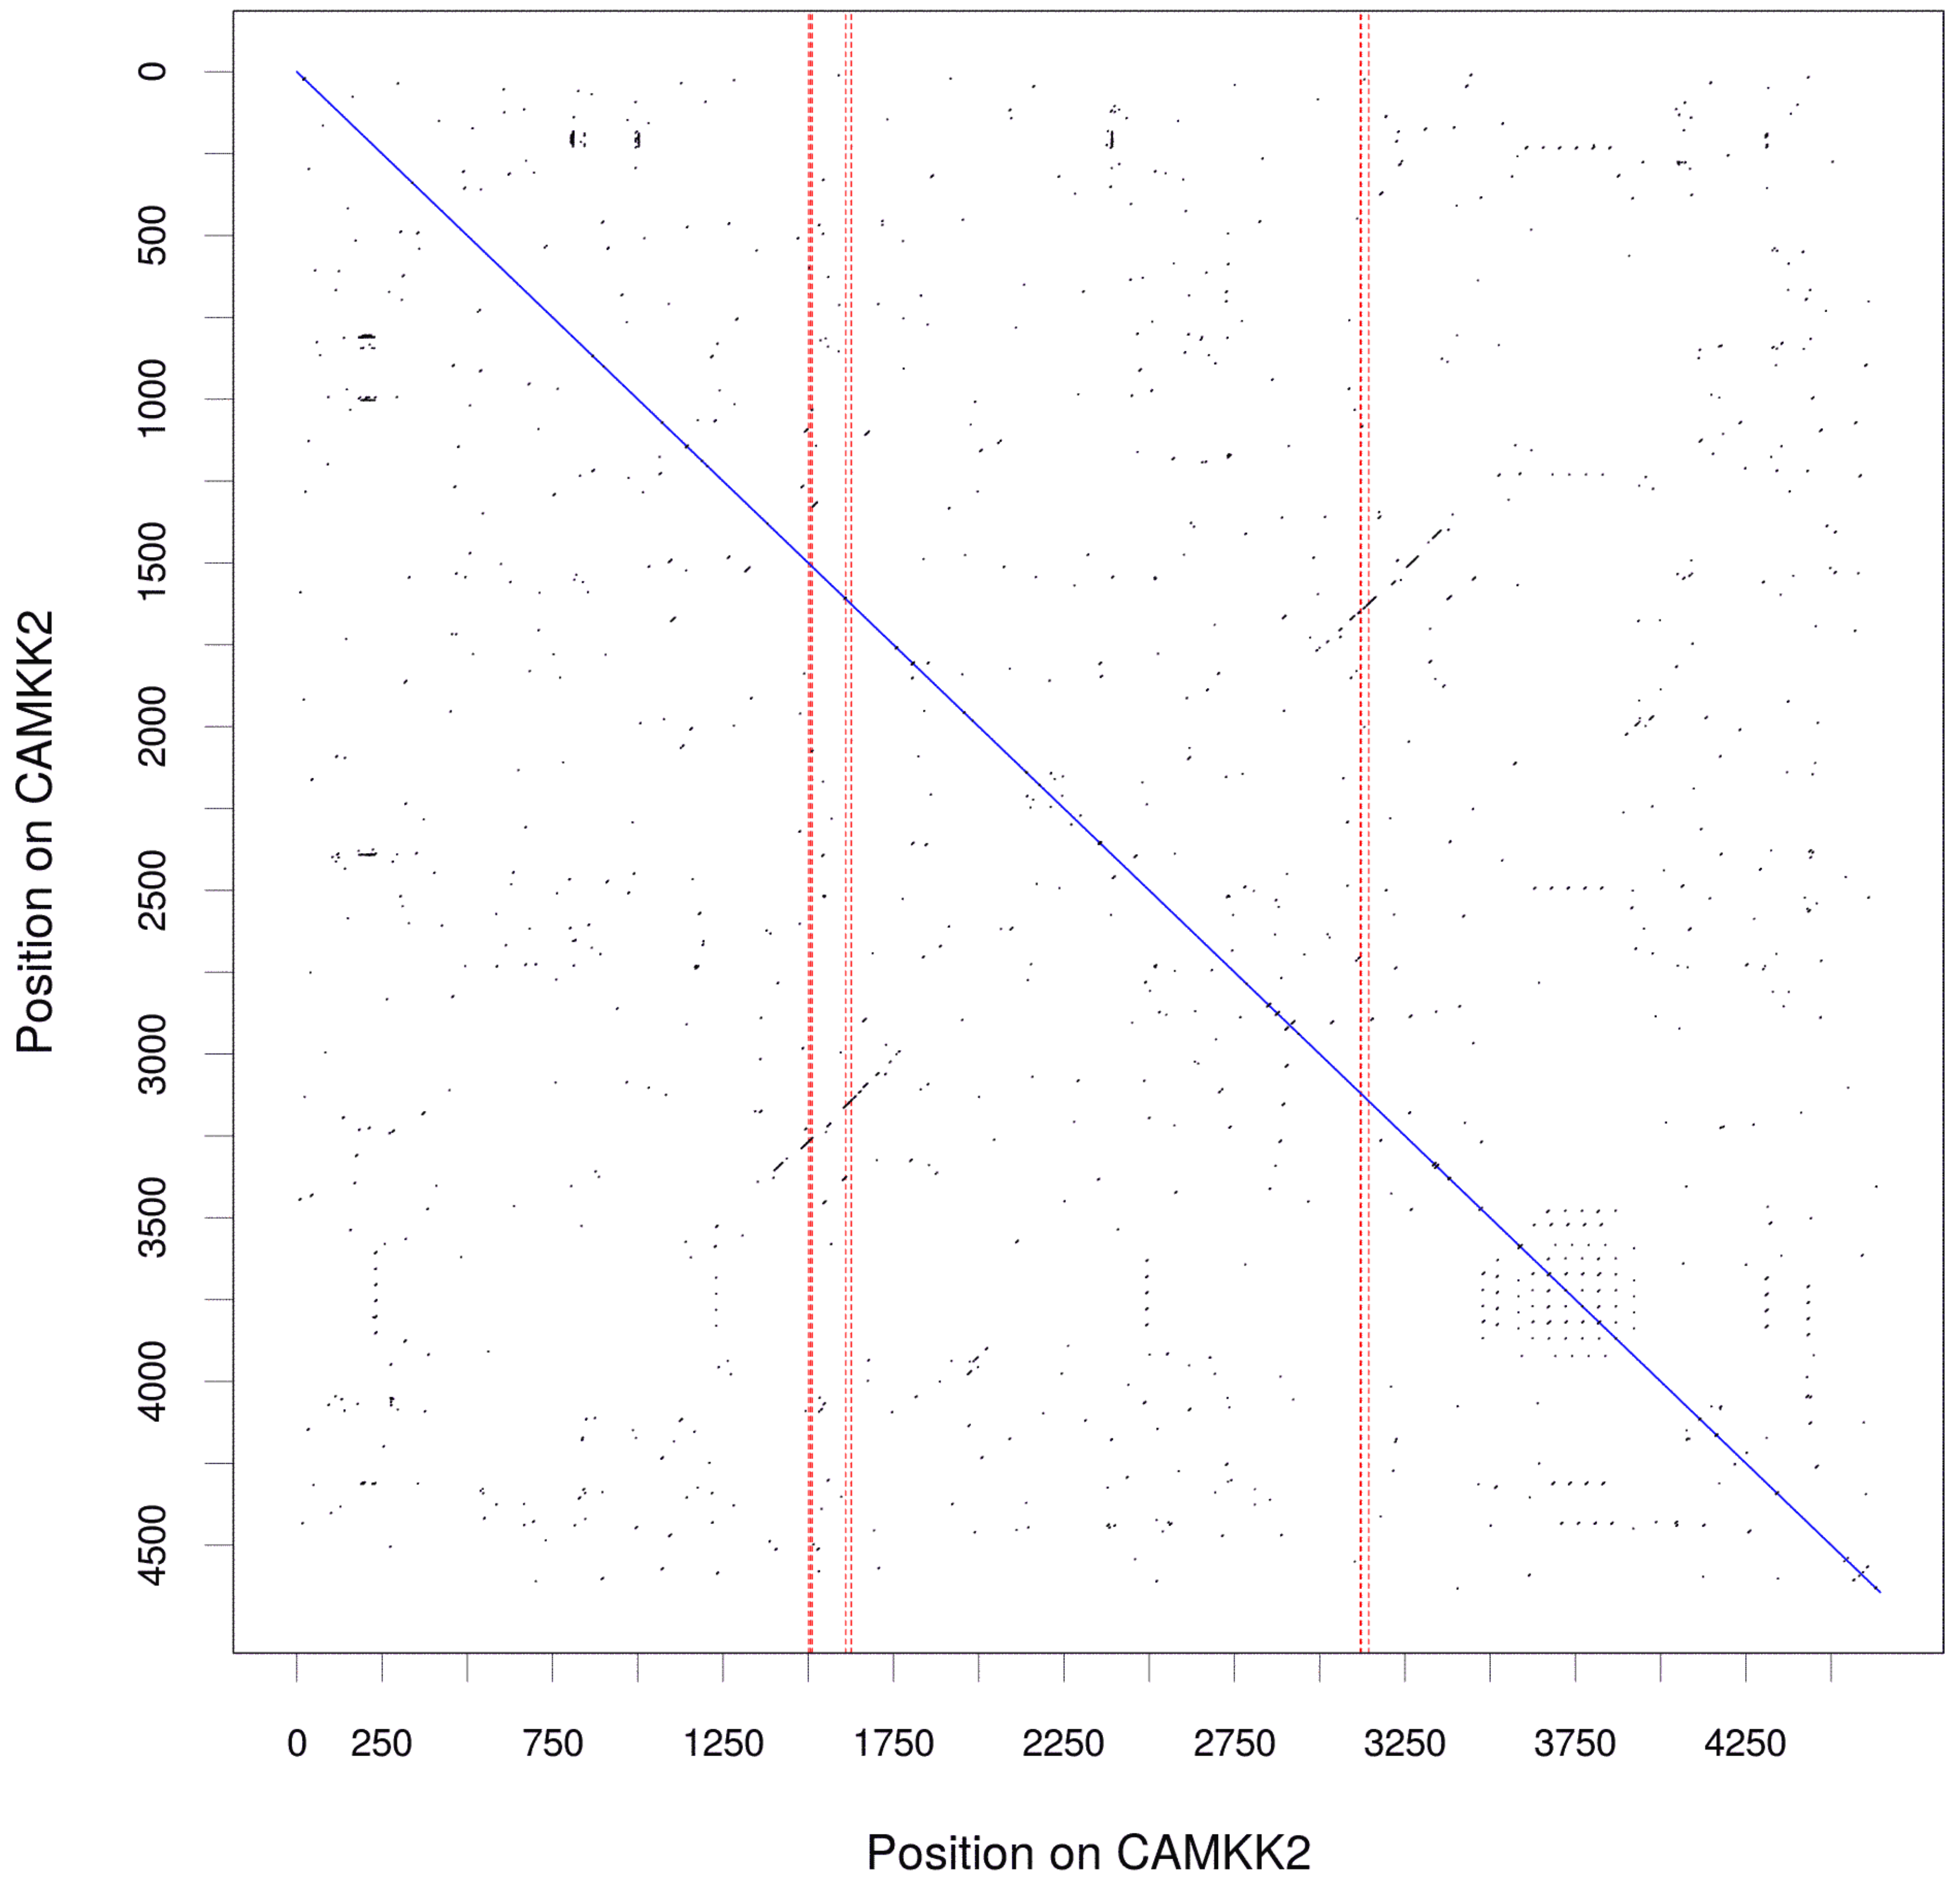

# CATSPERD

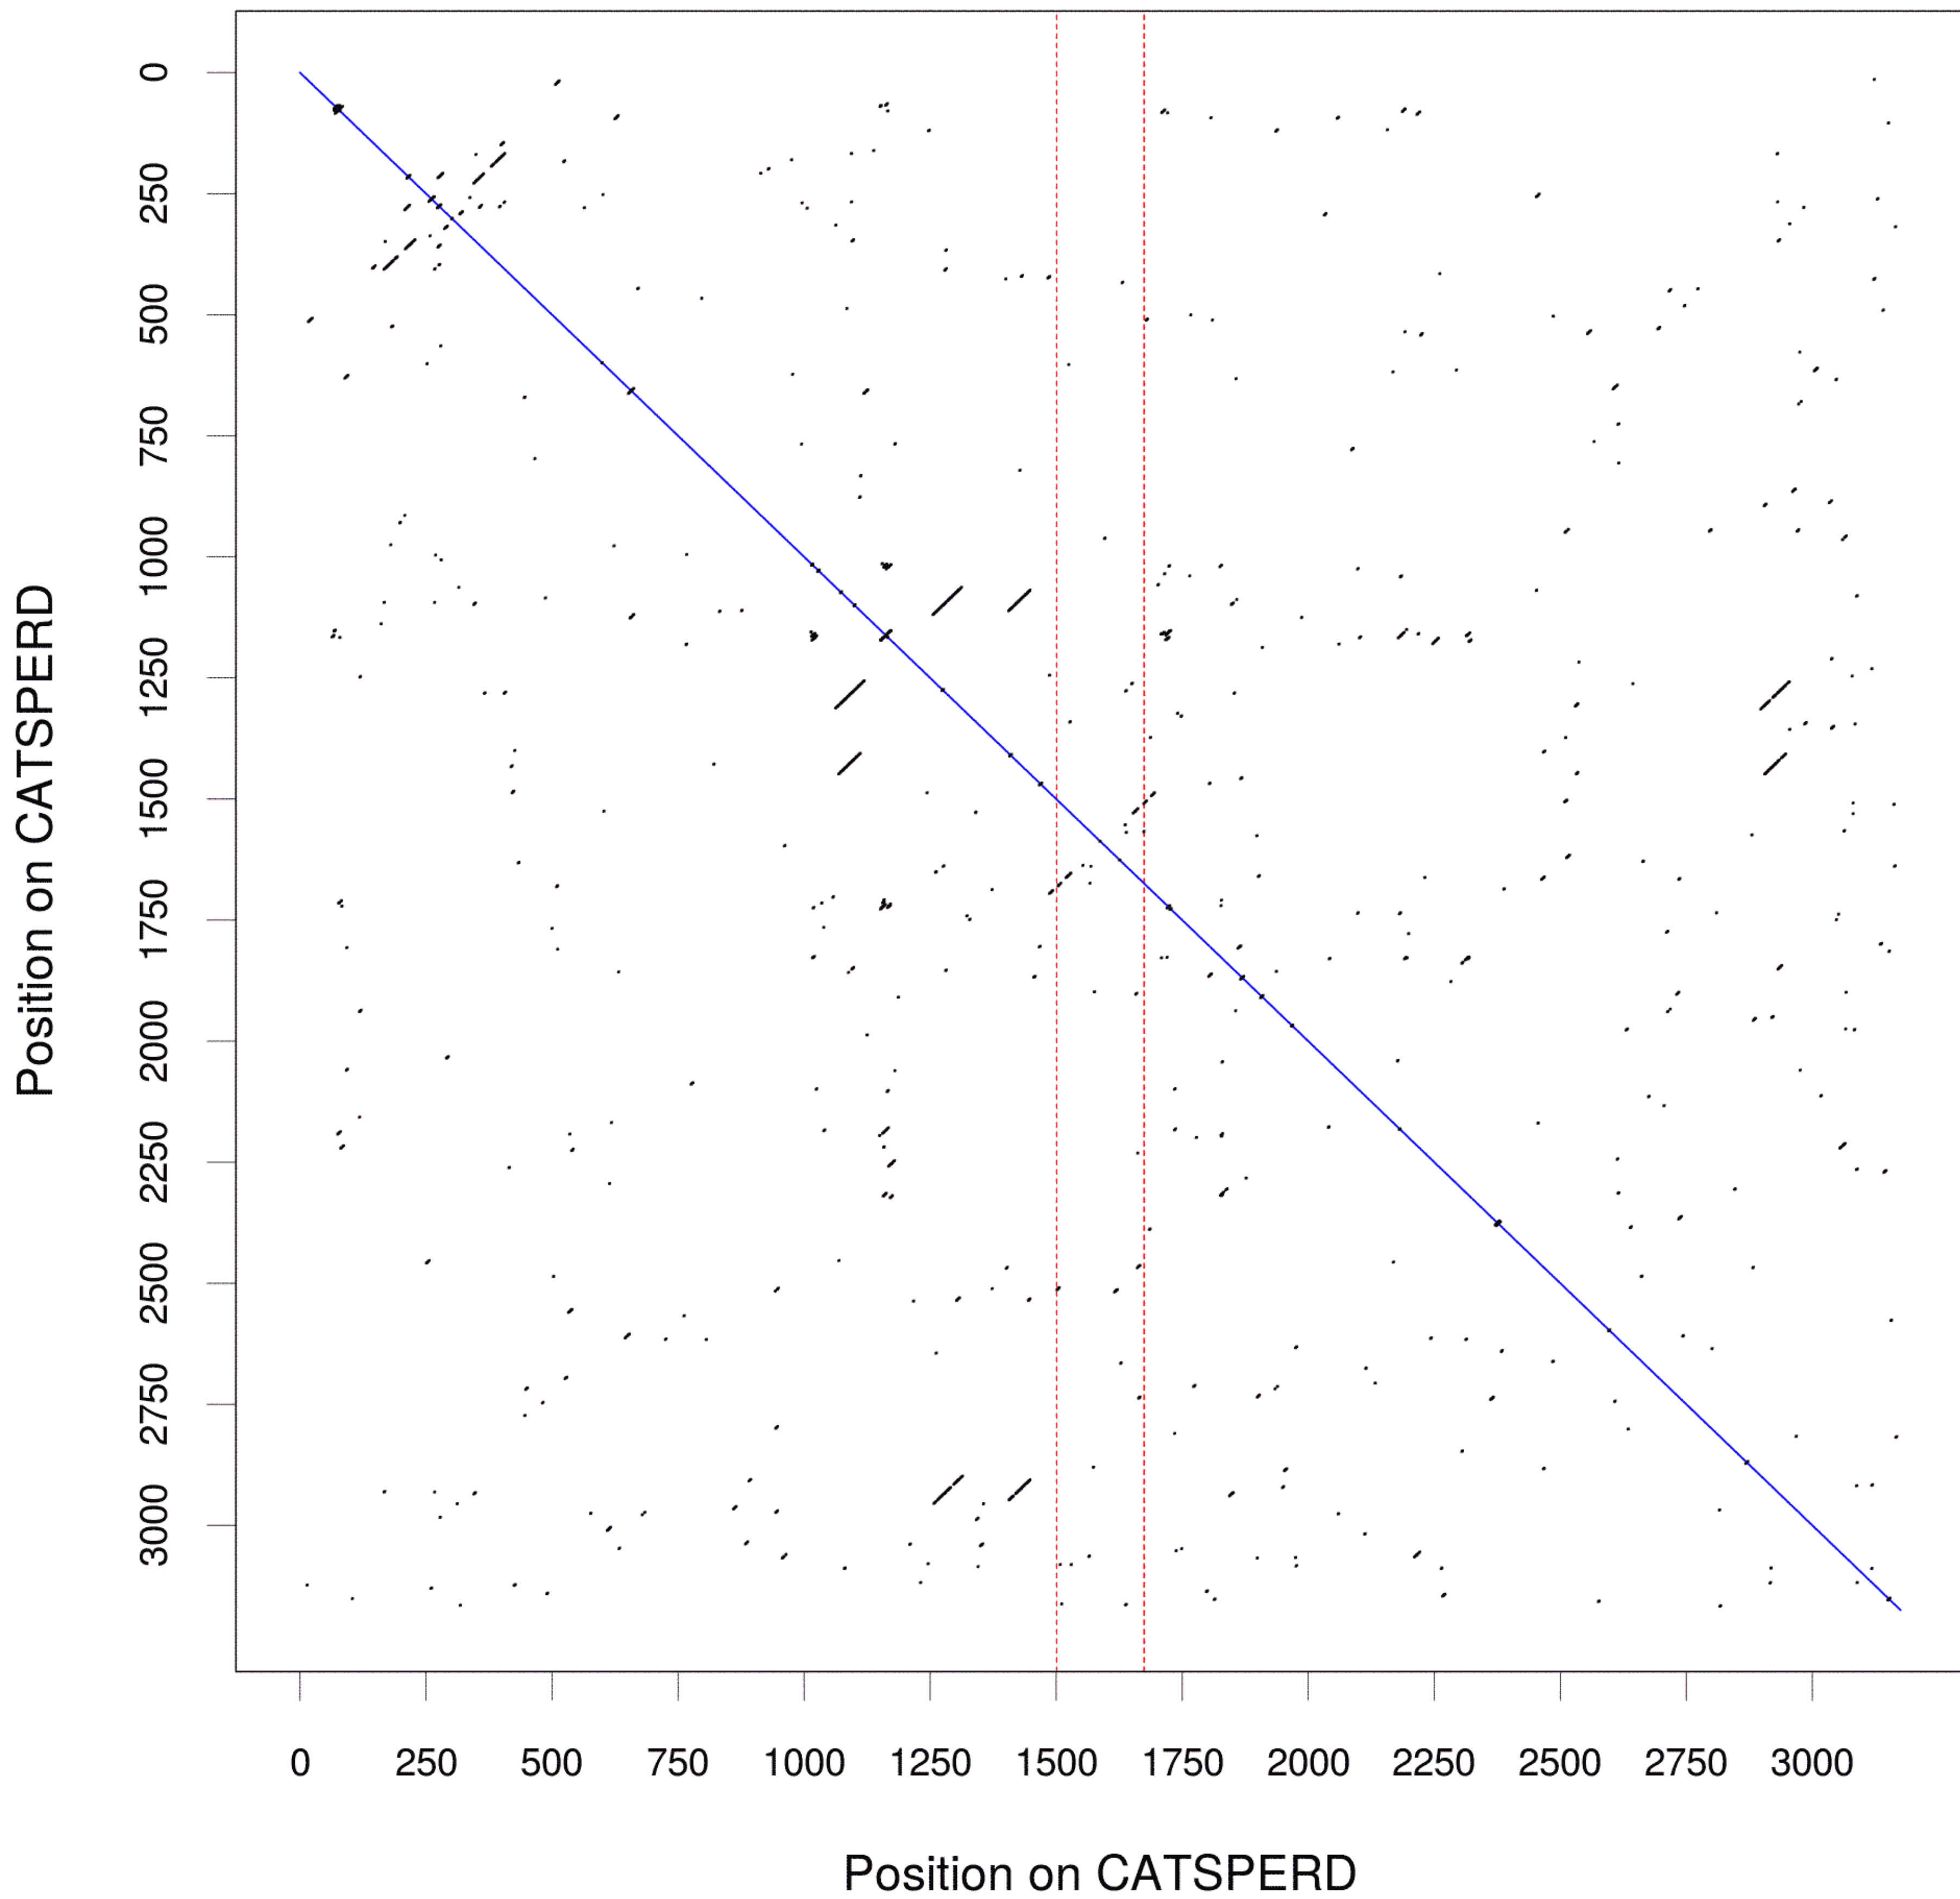

# CCDC51

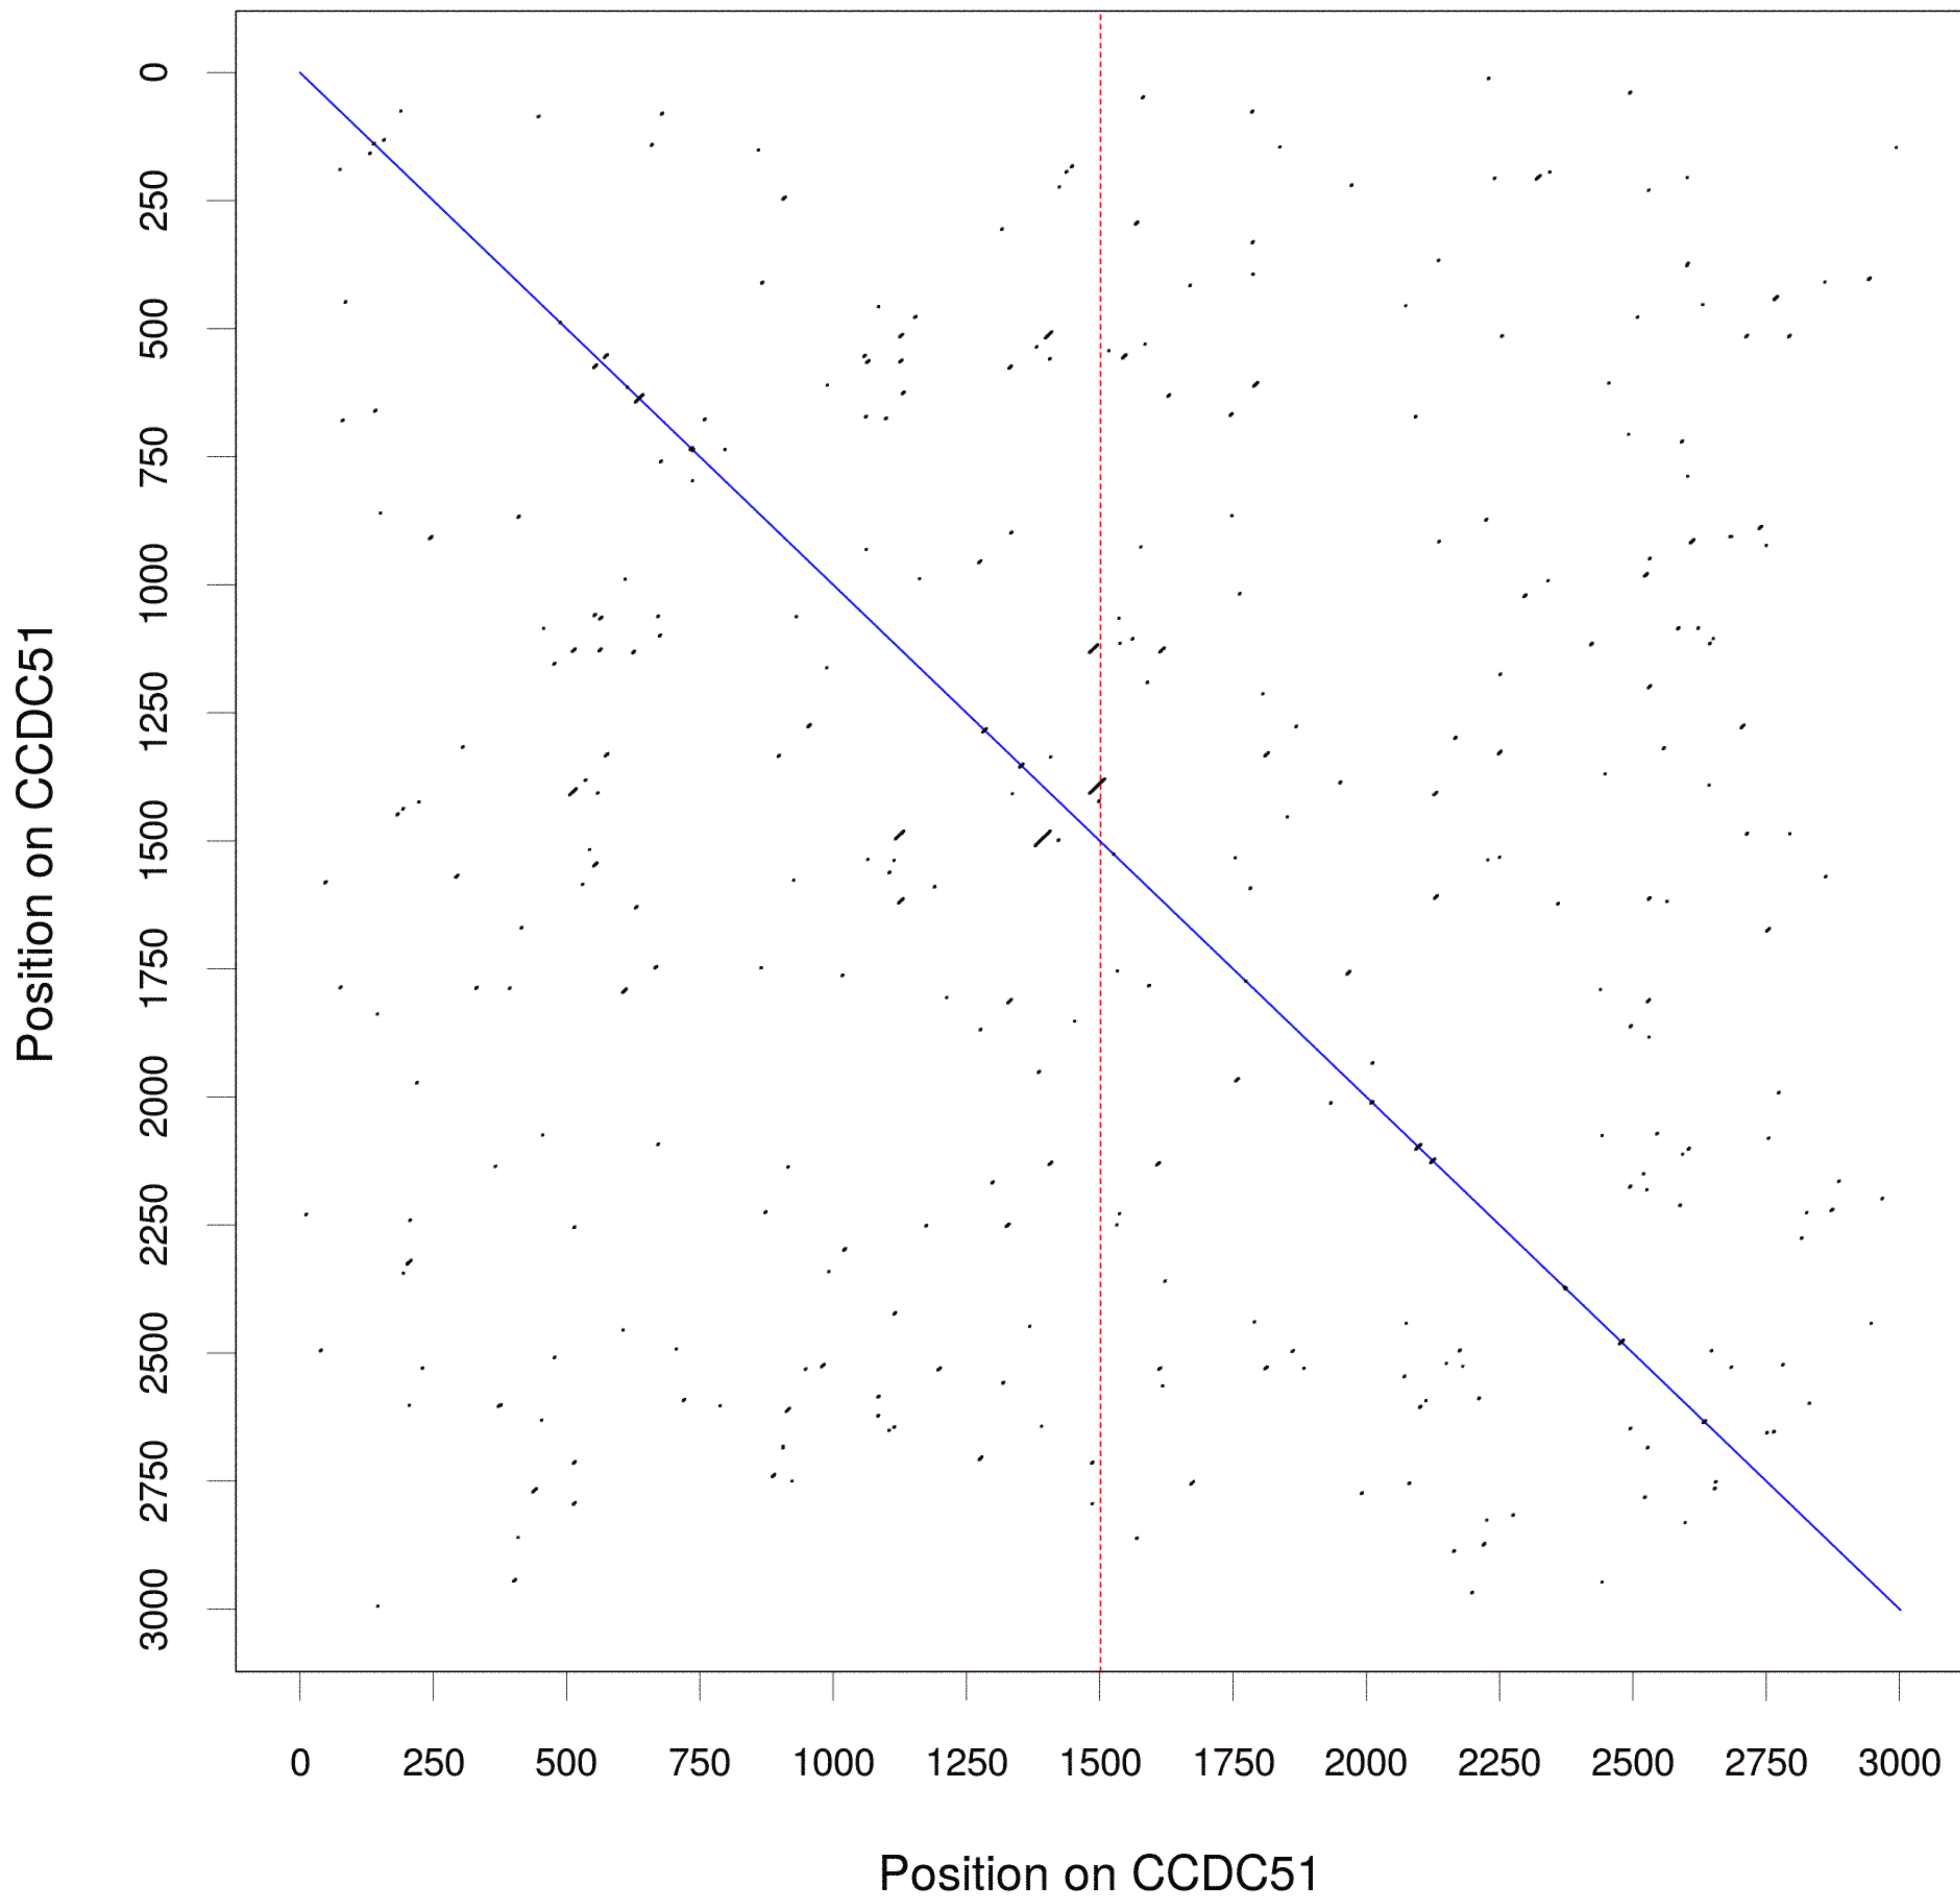

# CCDC57

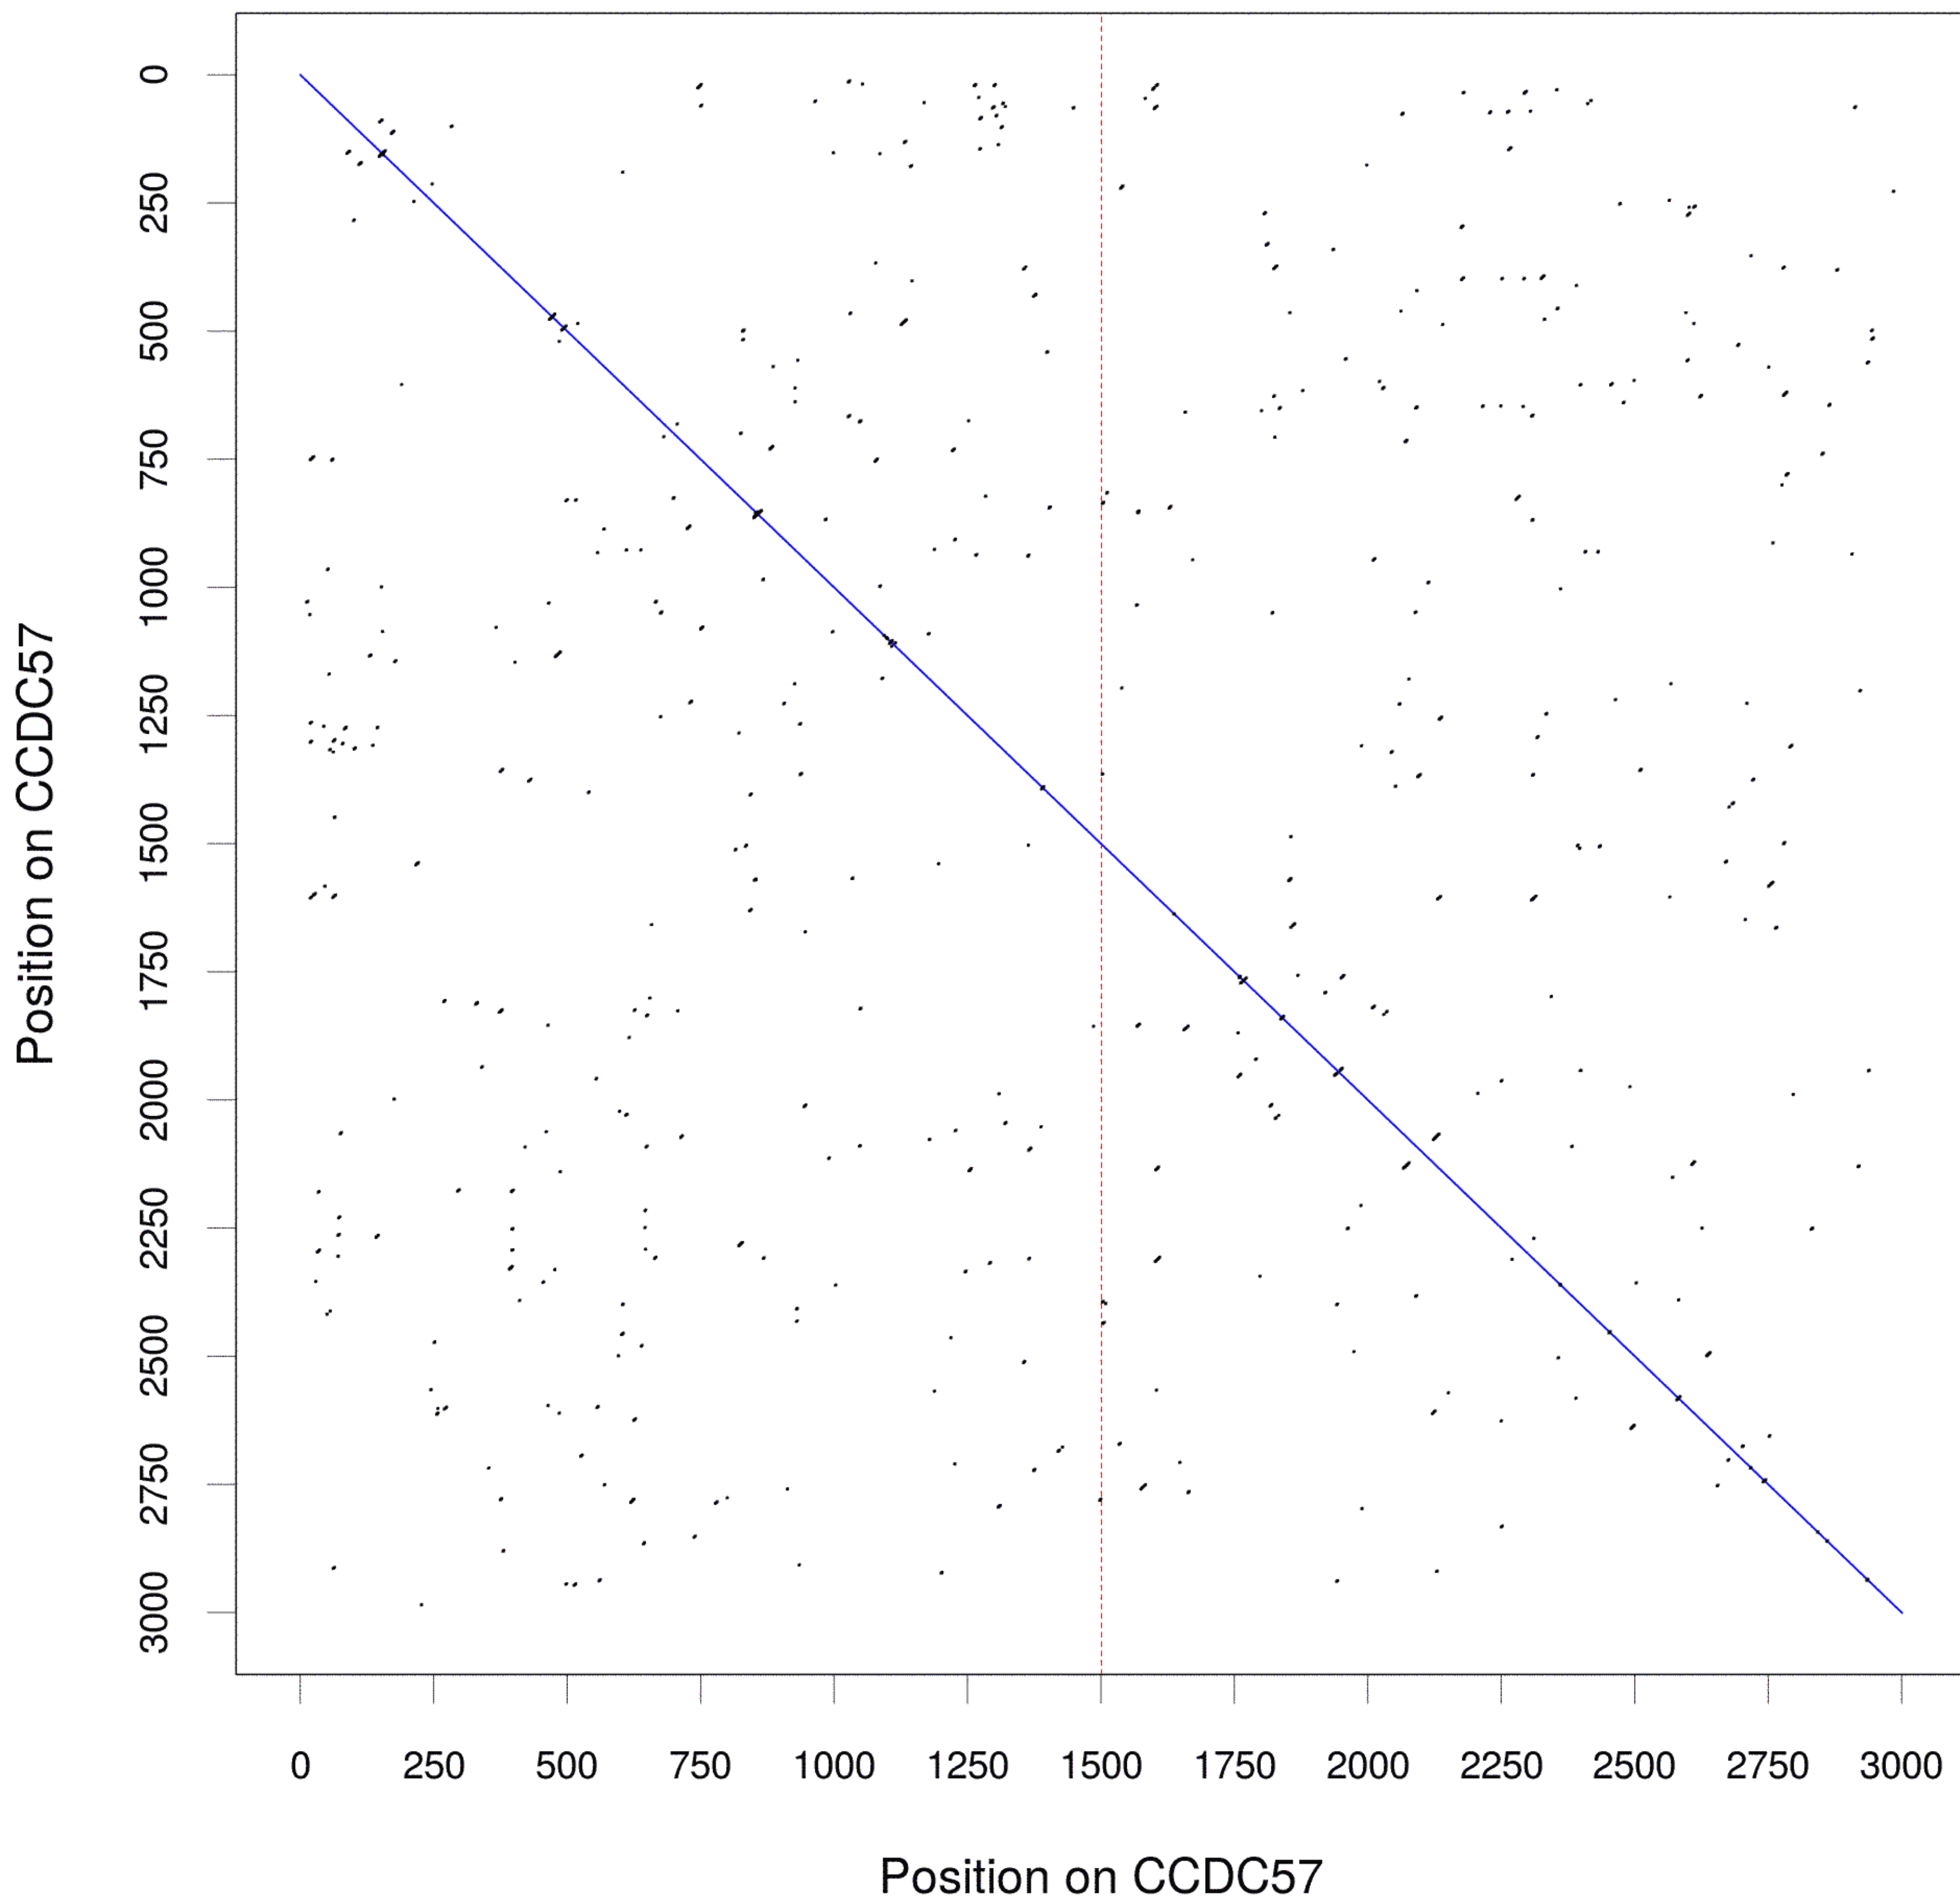



# CCDC64

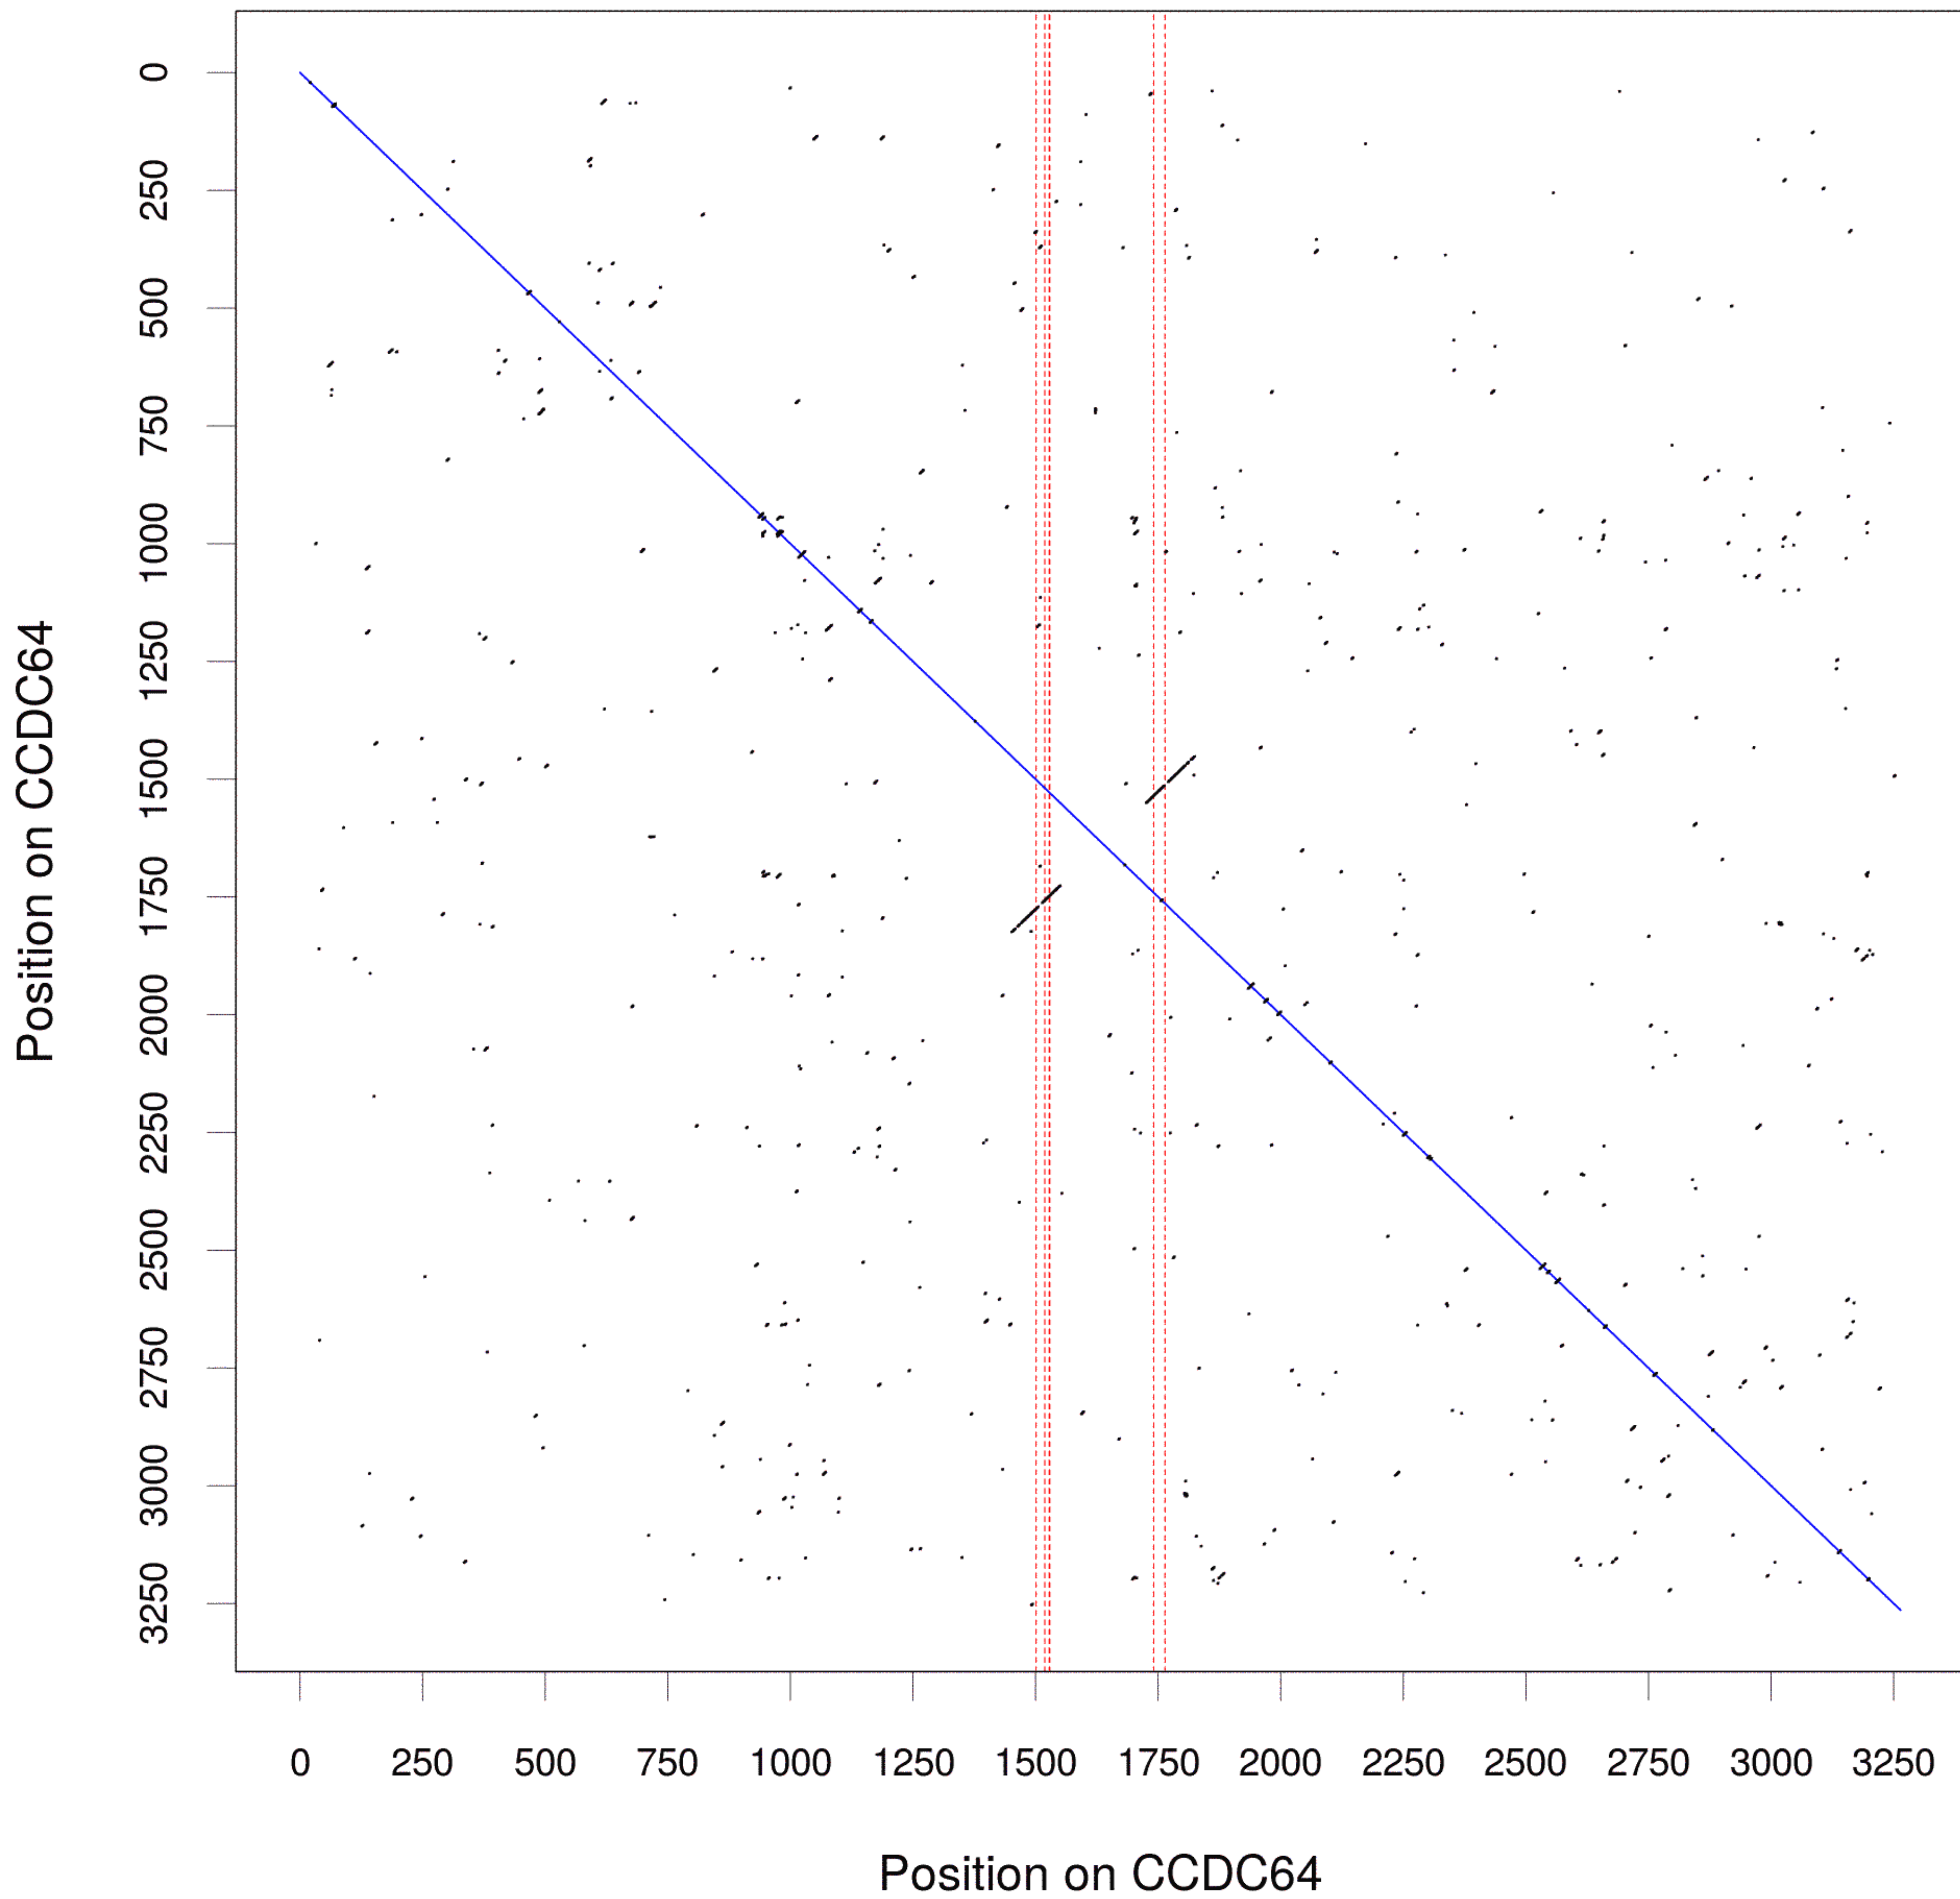

# CCDC82

Position on CCDC82

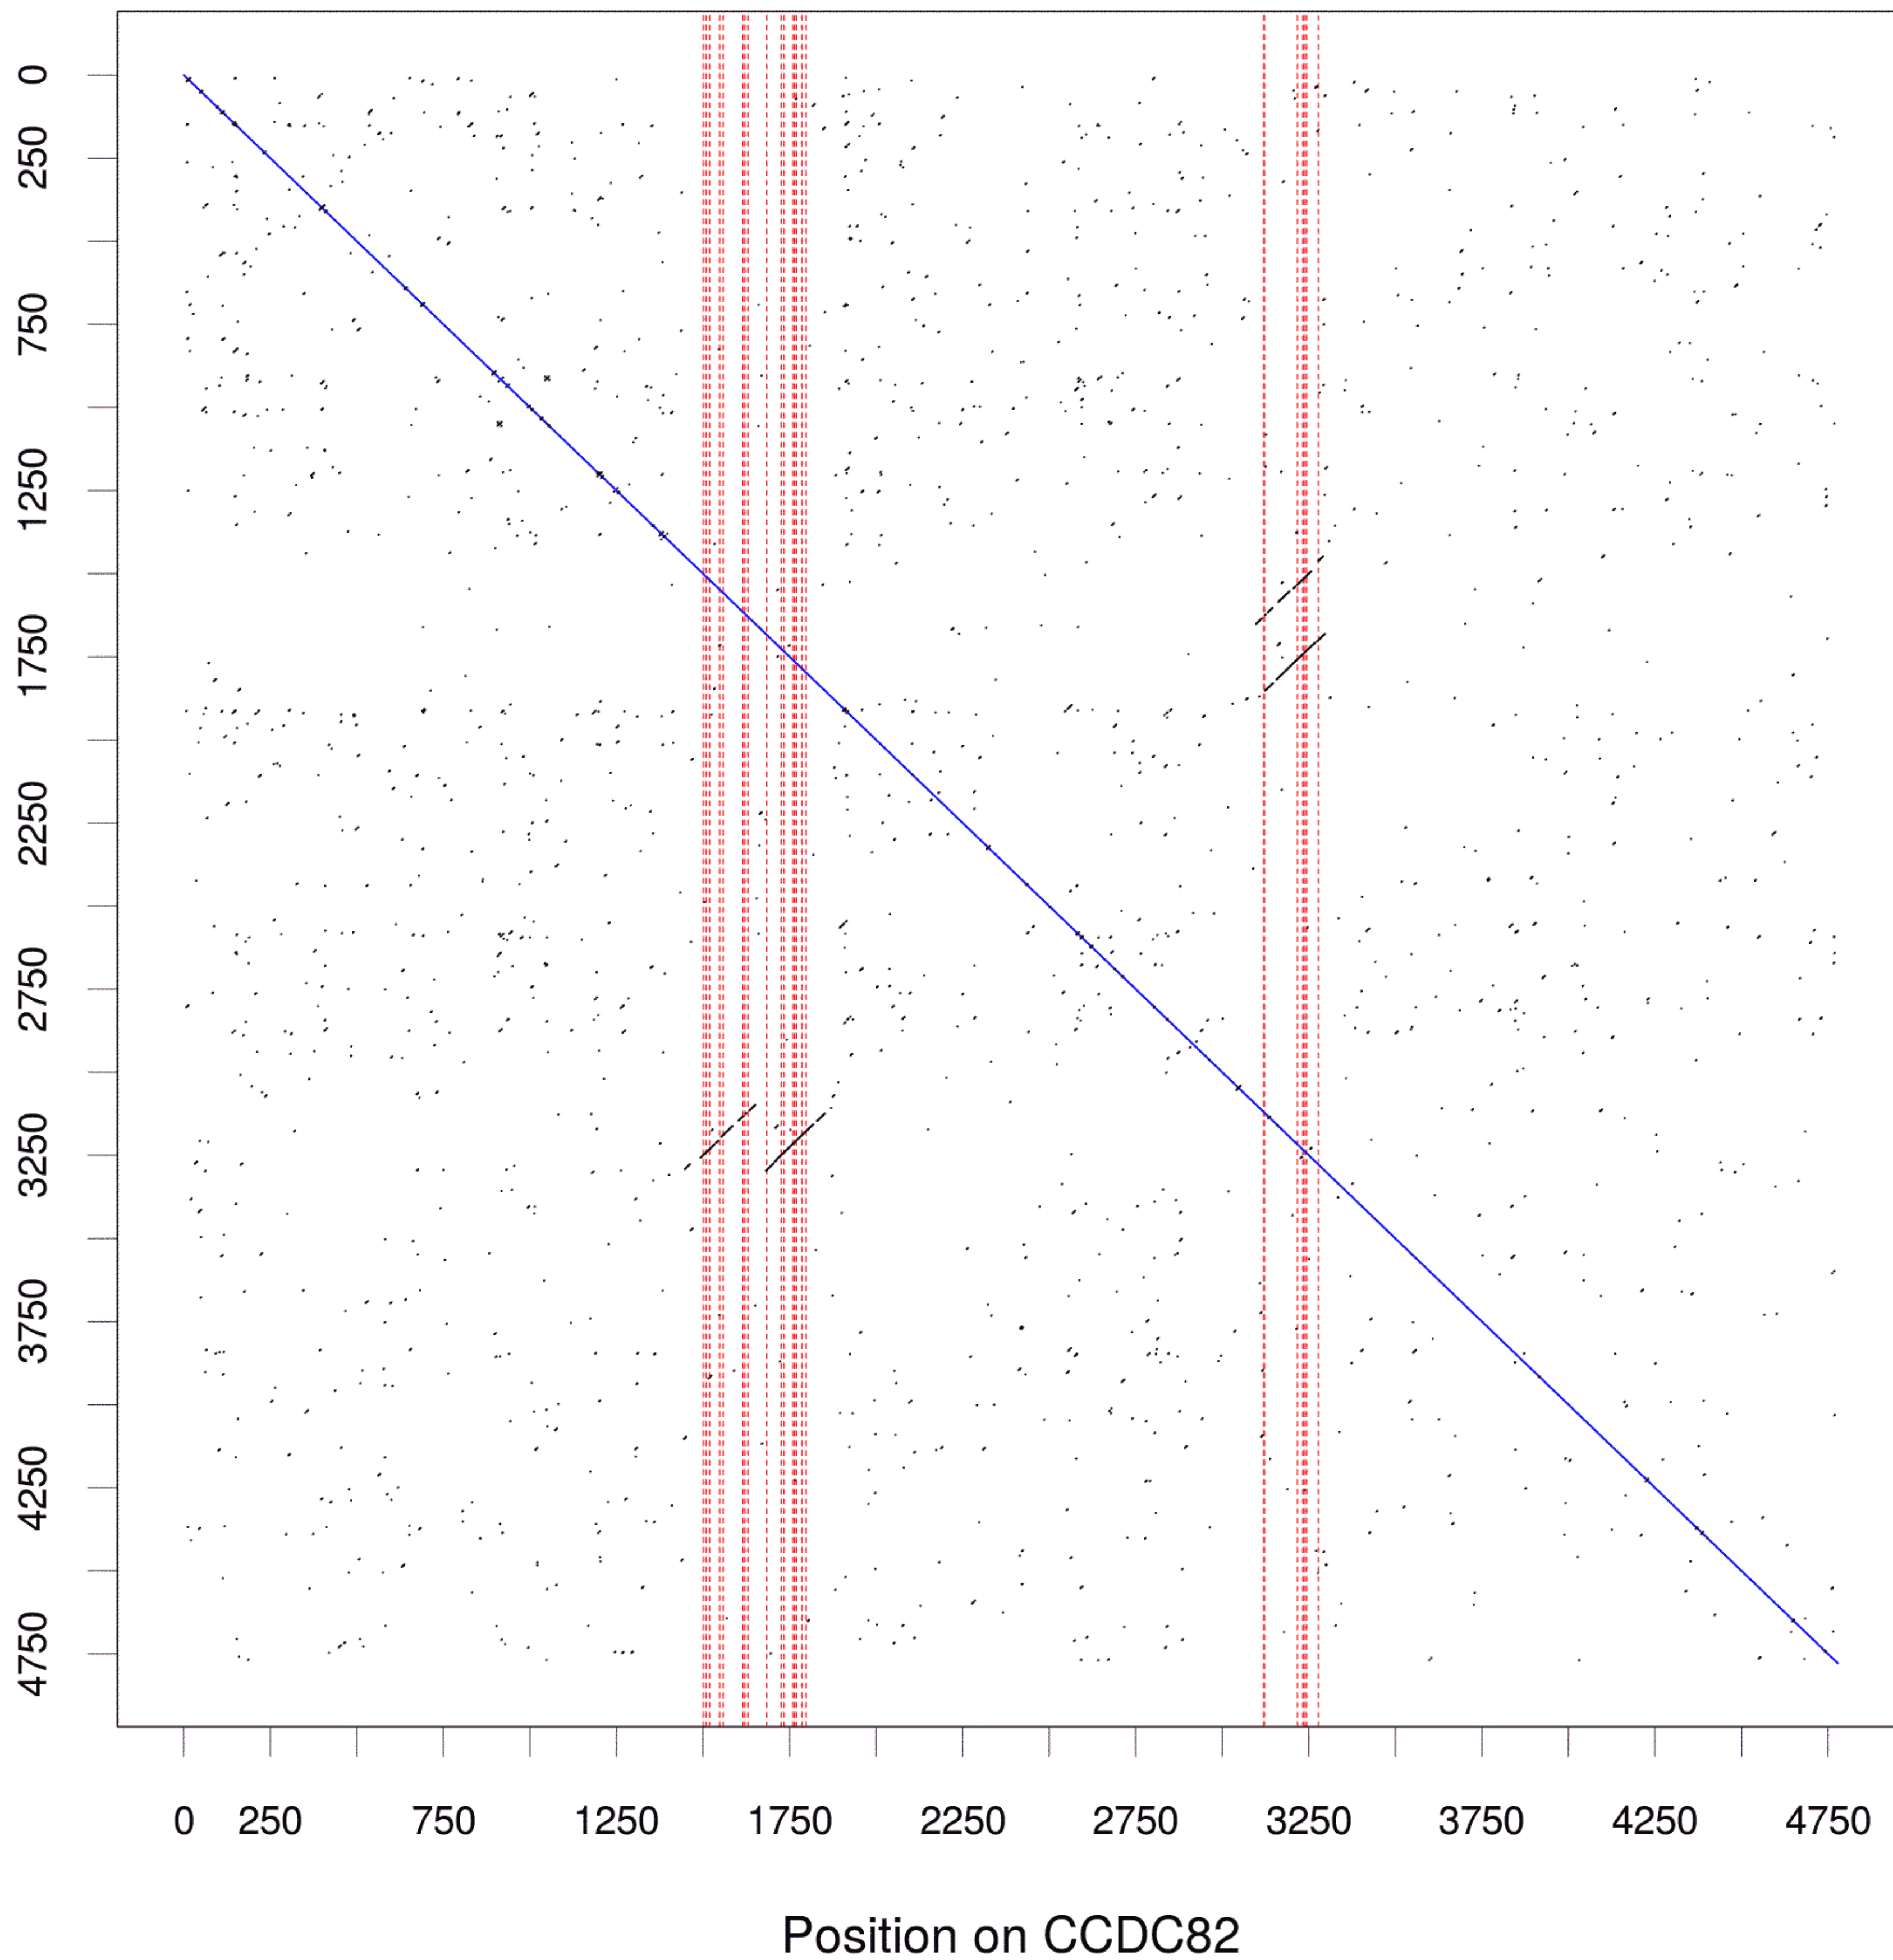

0 250 750 1250 1750 2250 2750 3250 3750 4250 4750

Position on CCDC82

# CCDC84

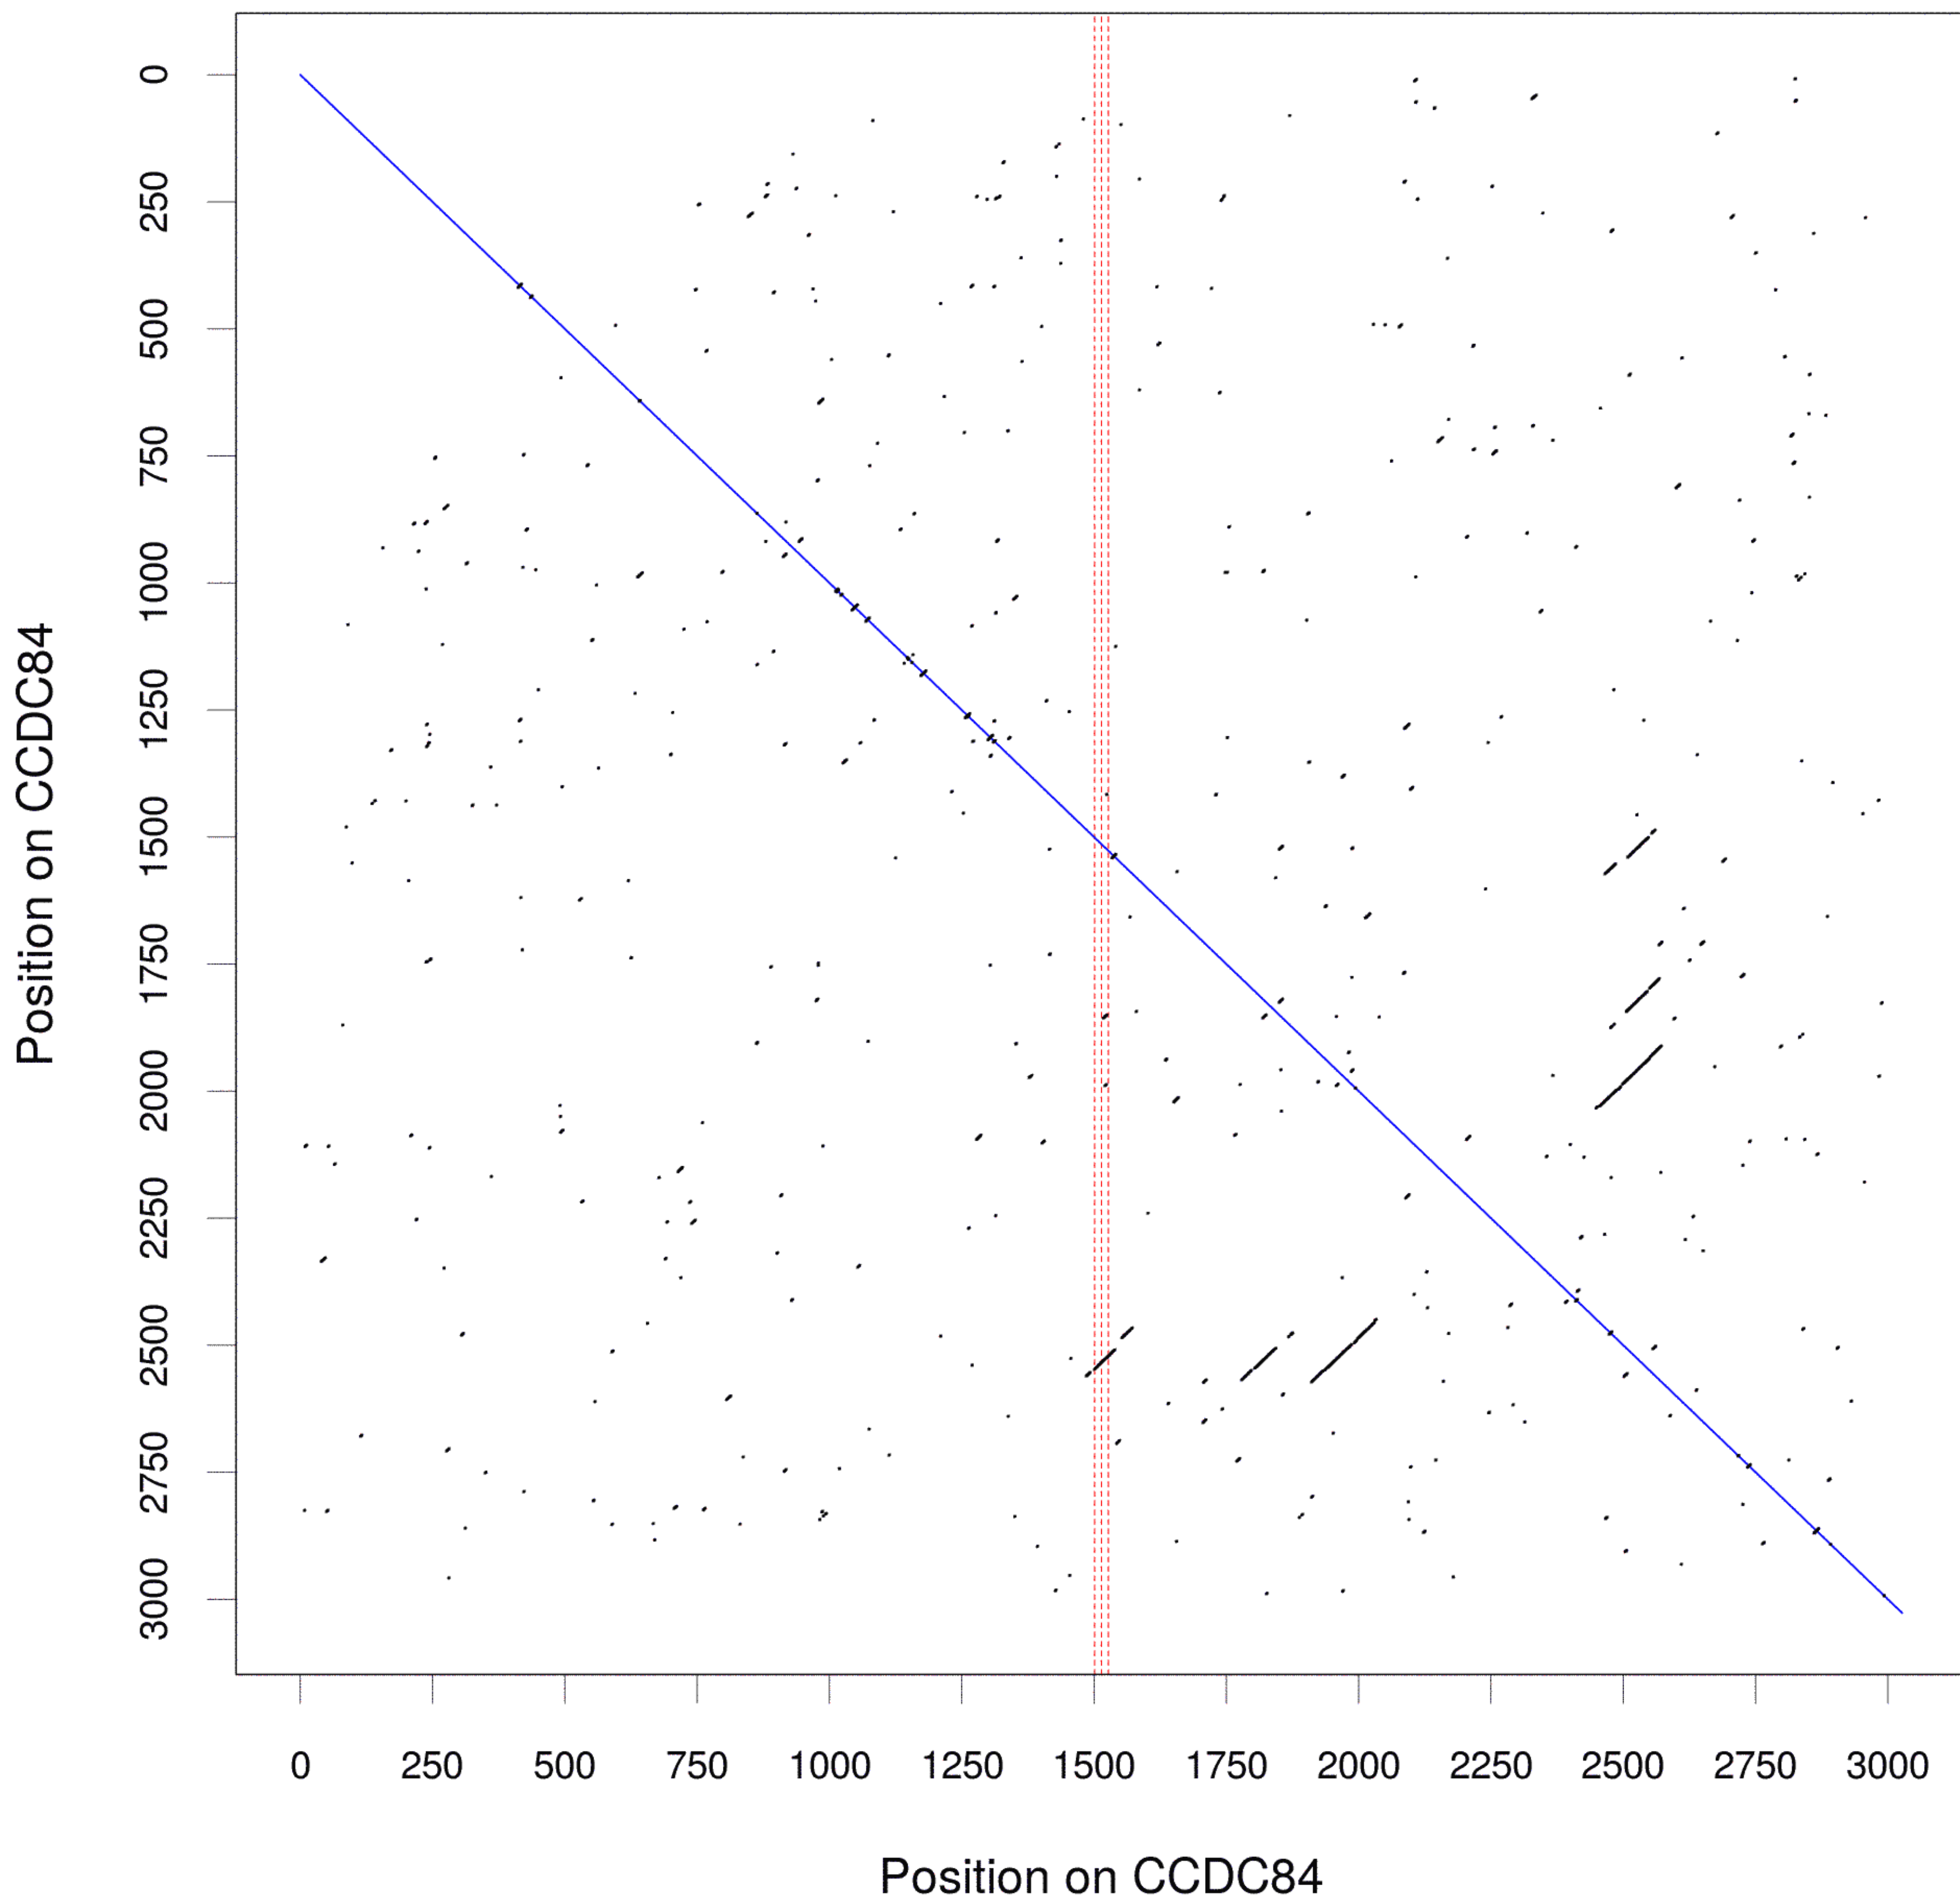

# CCNDBP1

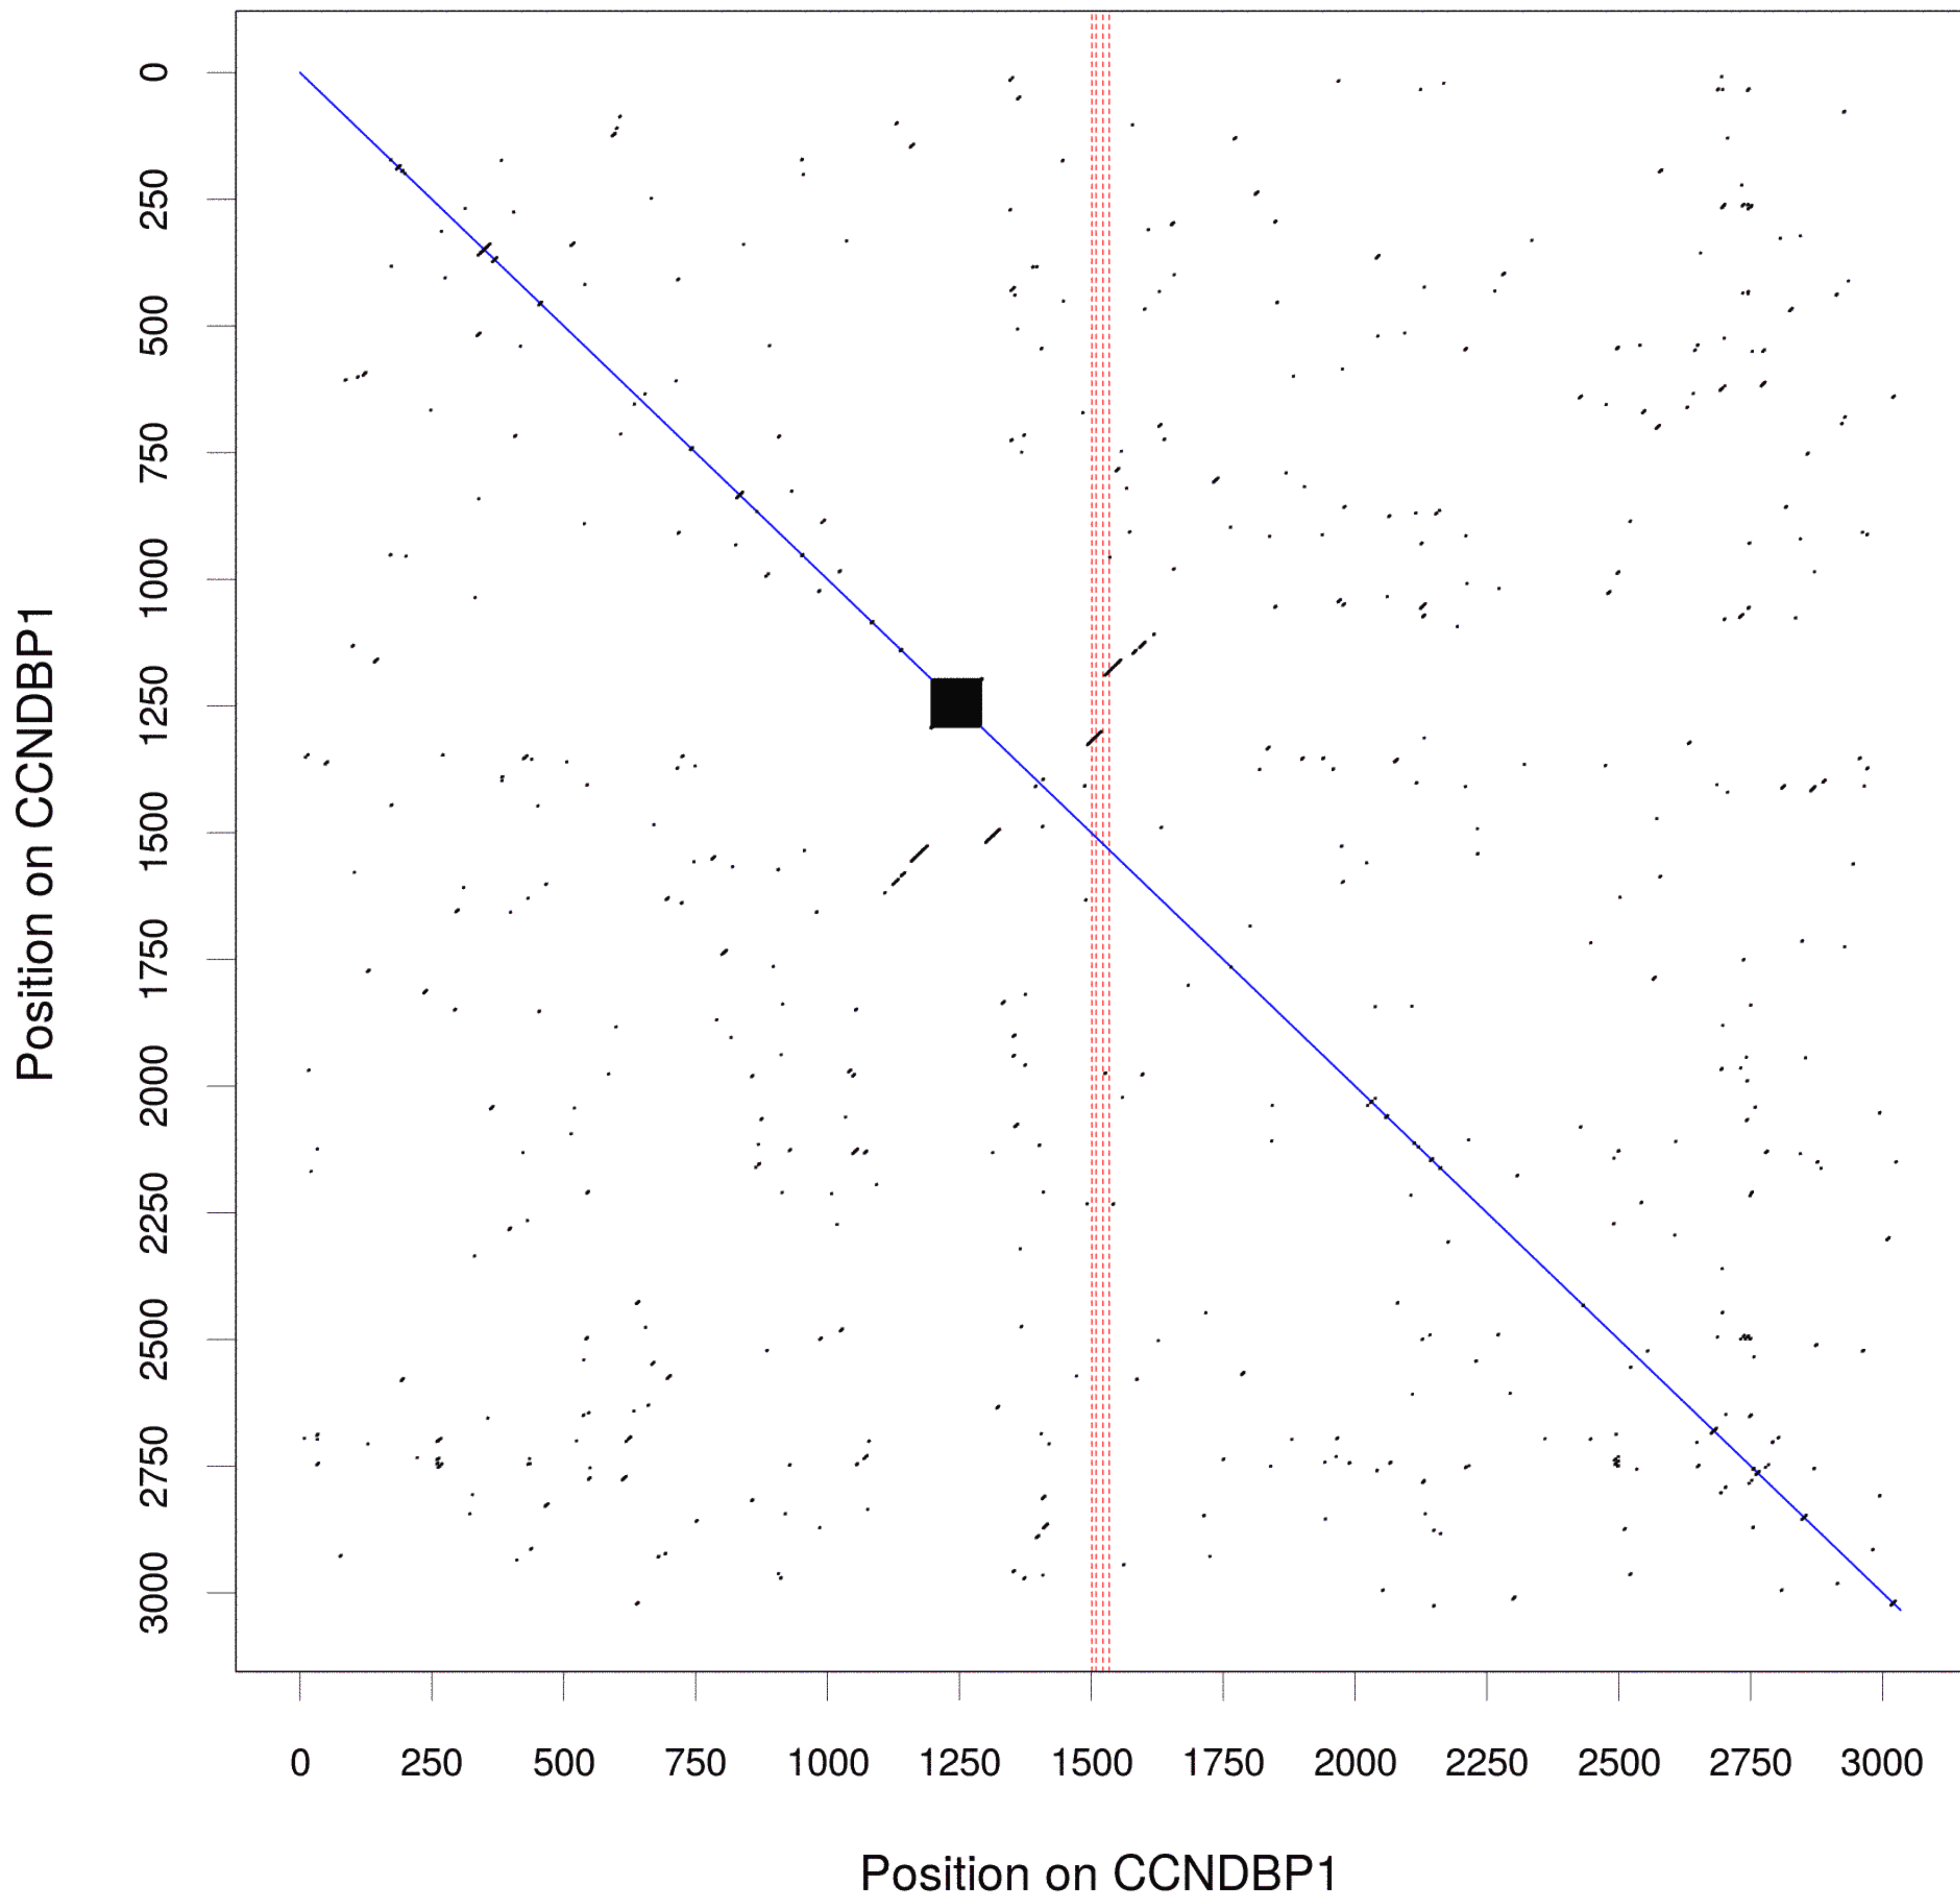

# CCNI

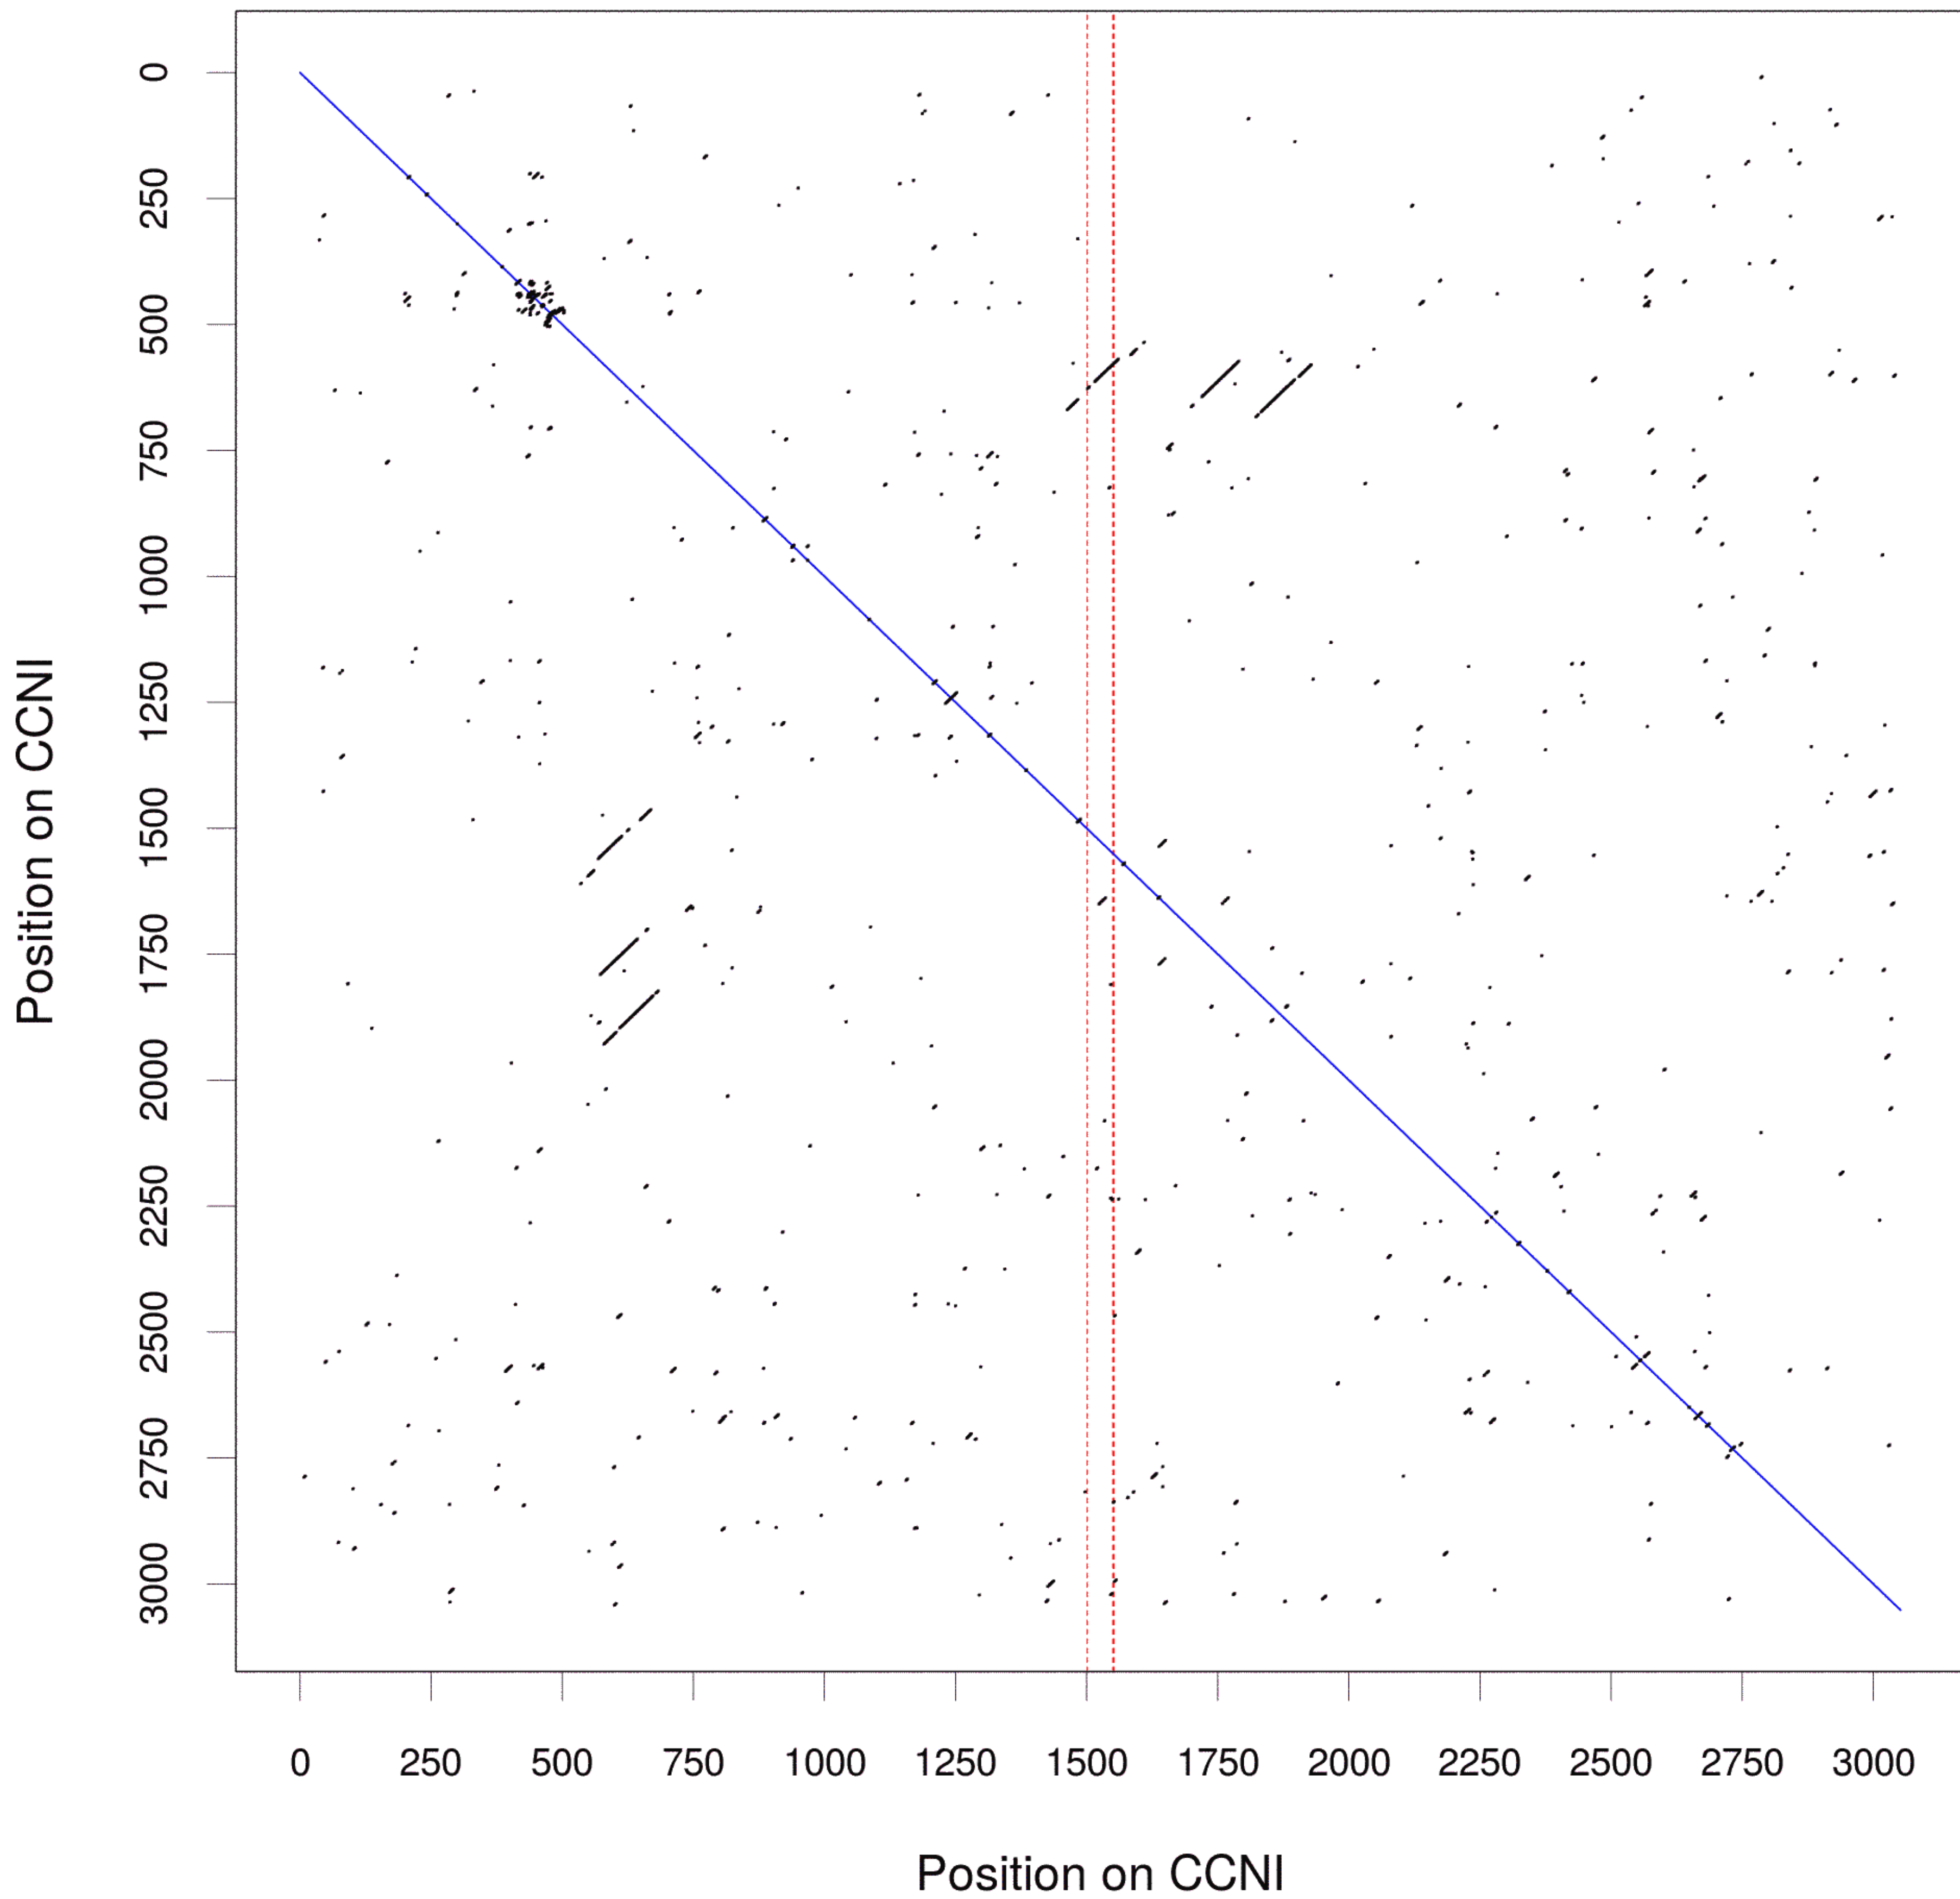

# CCS

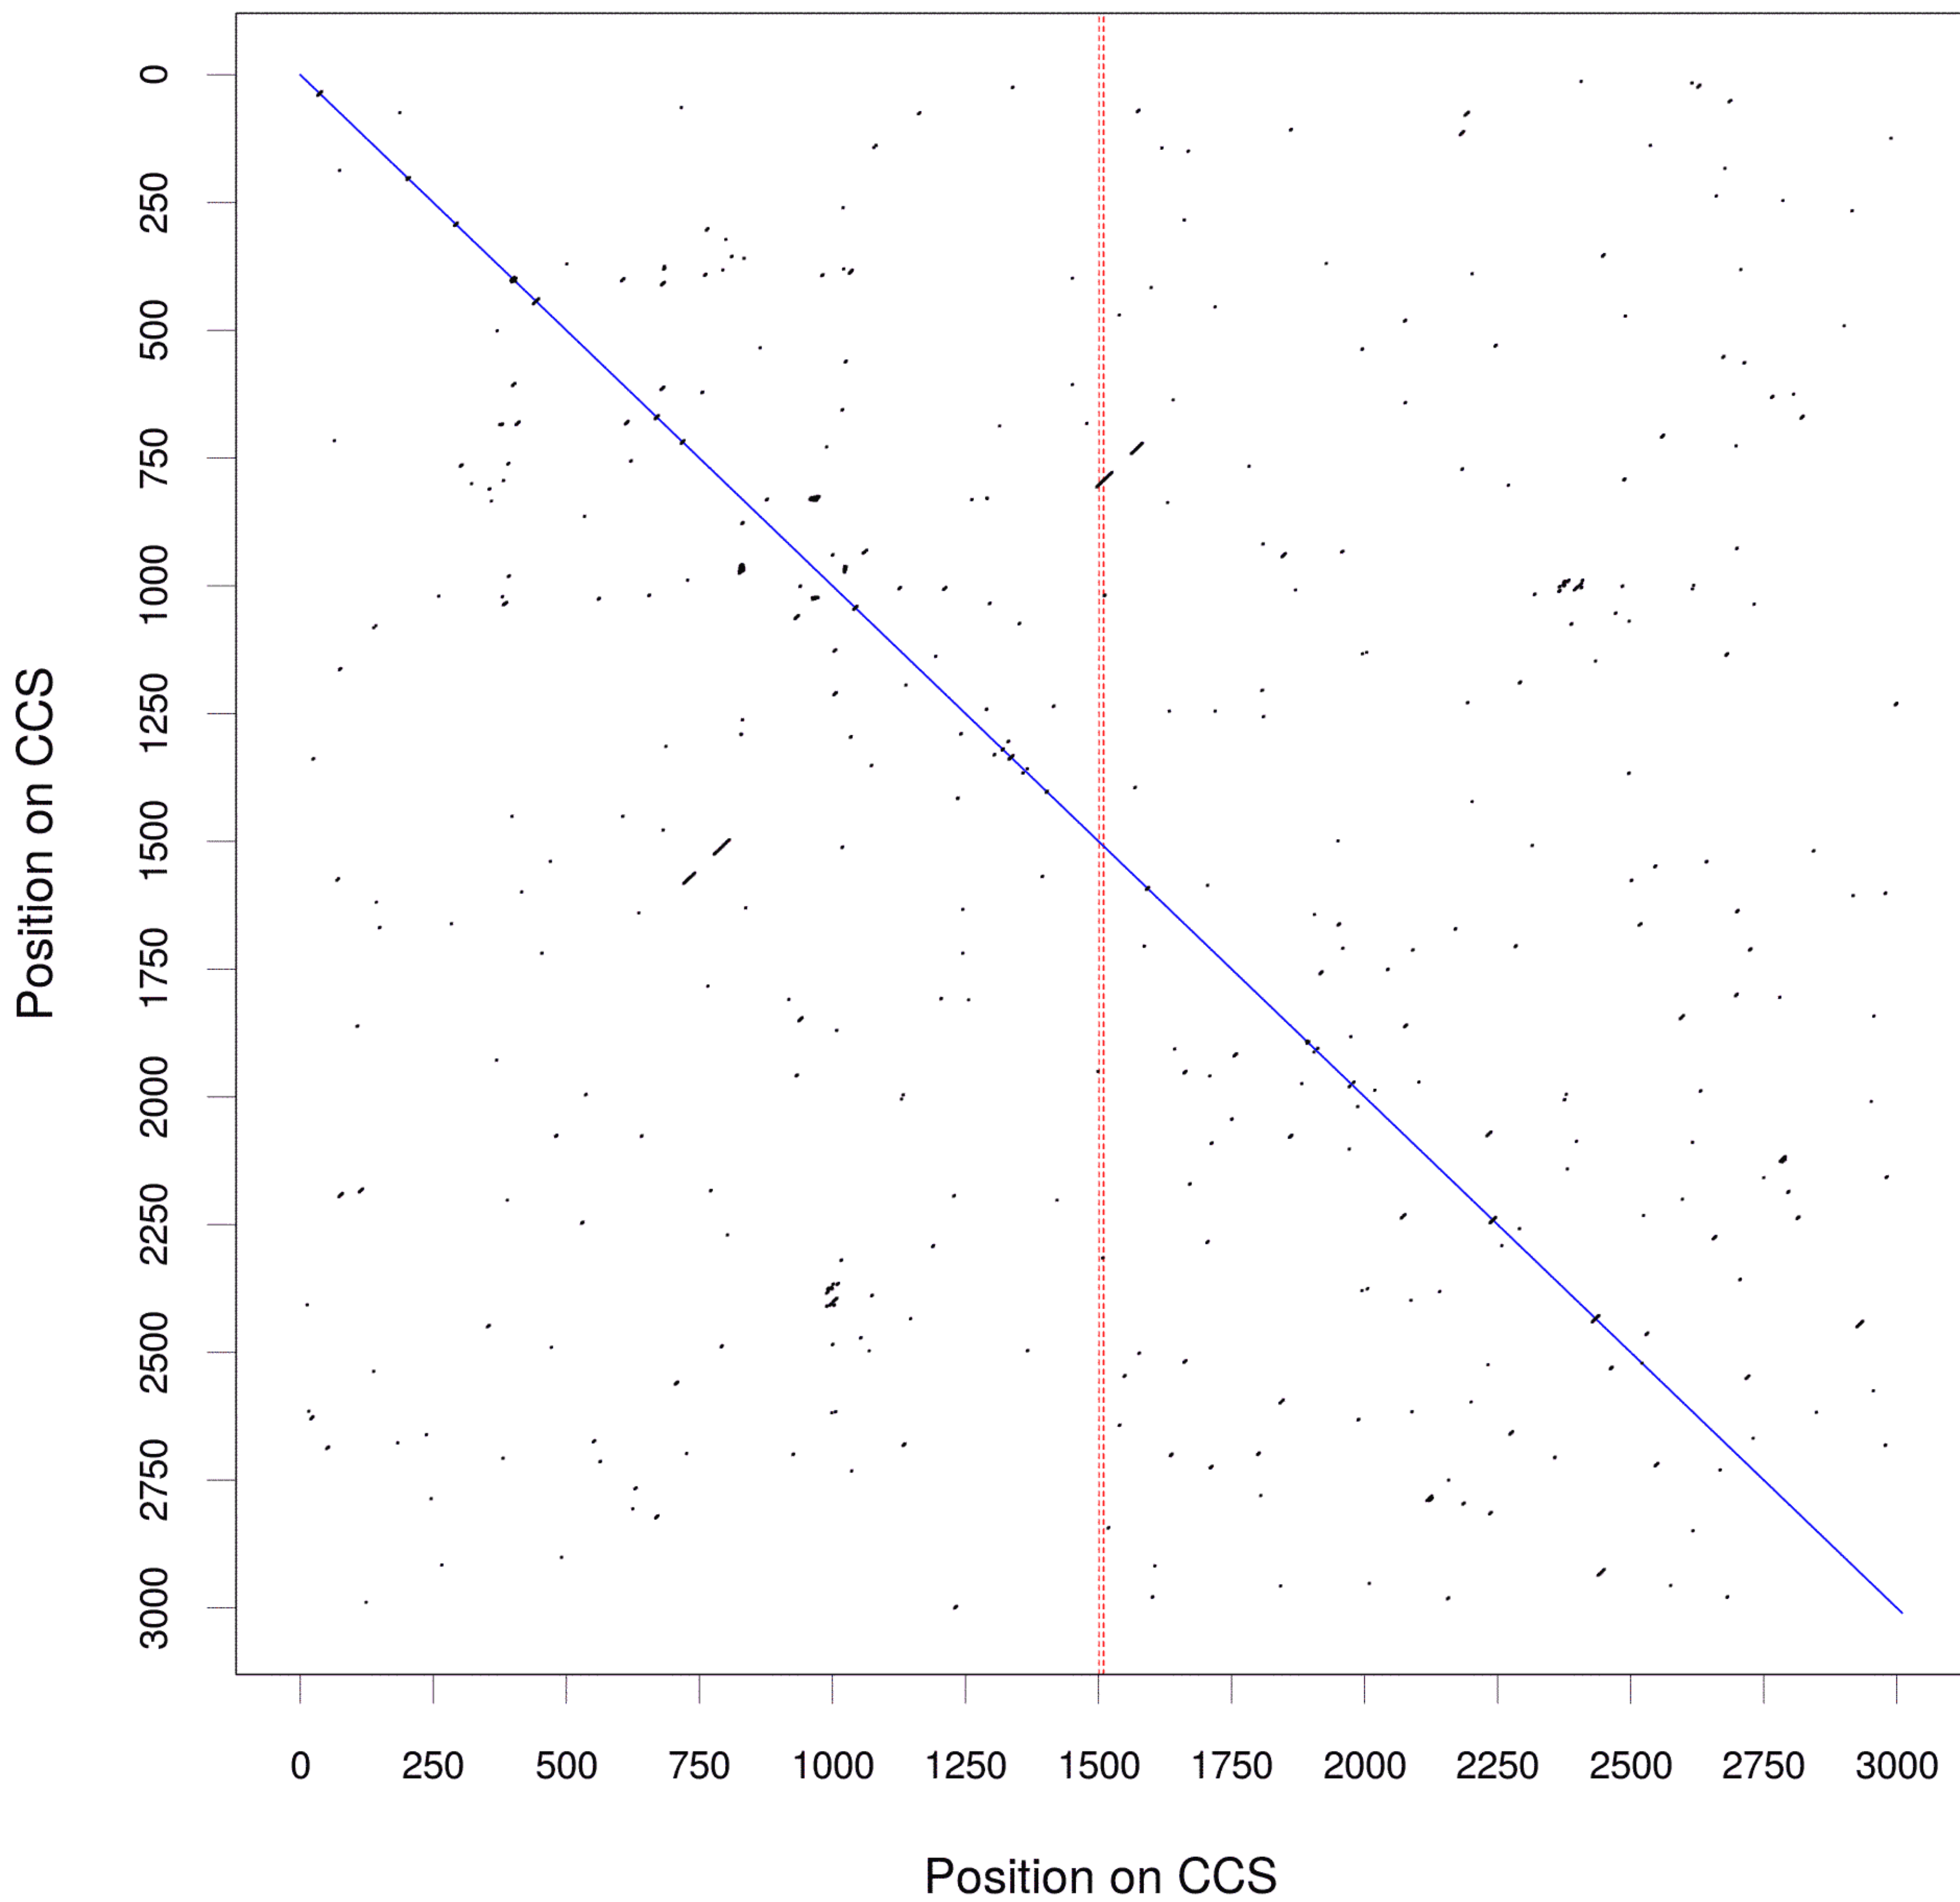

# CD1D

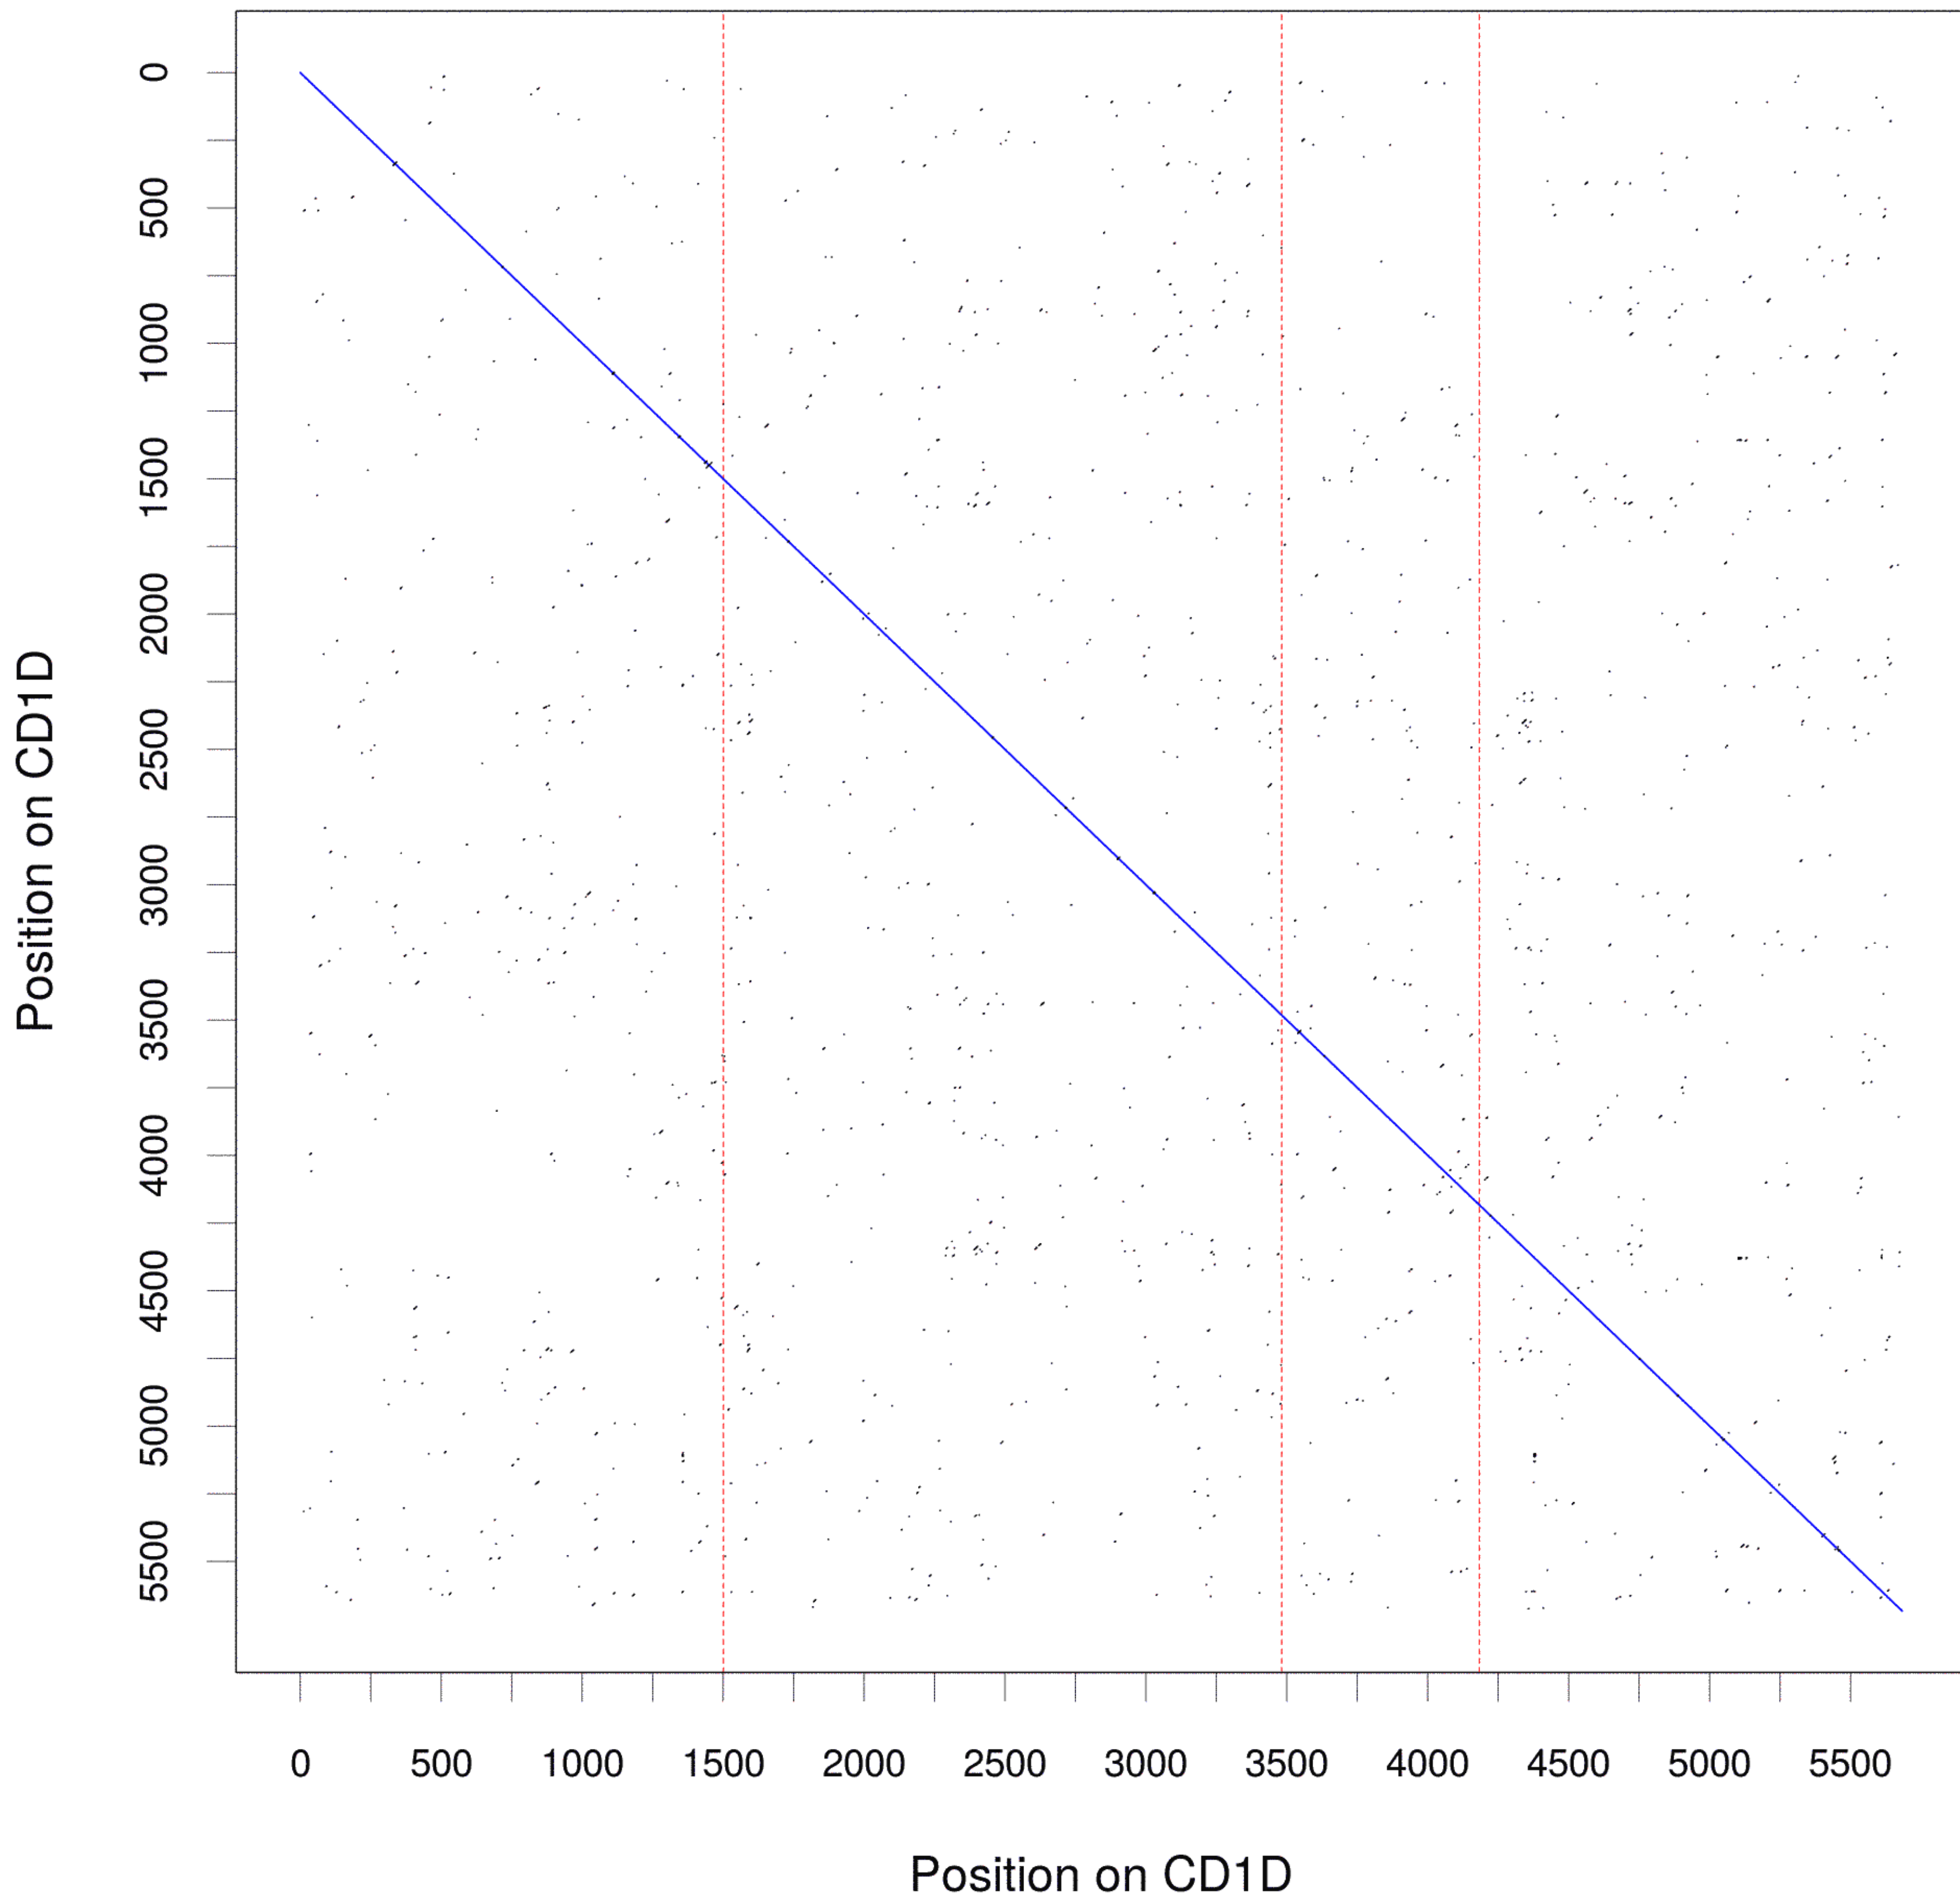

# CD9

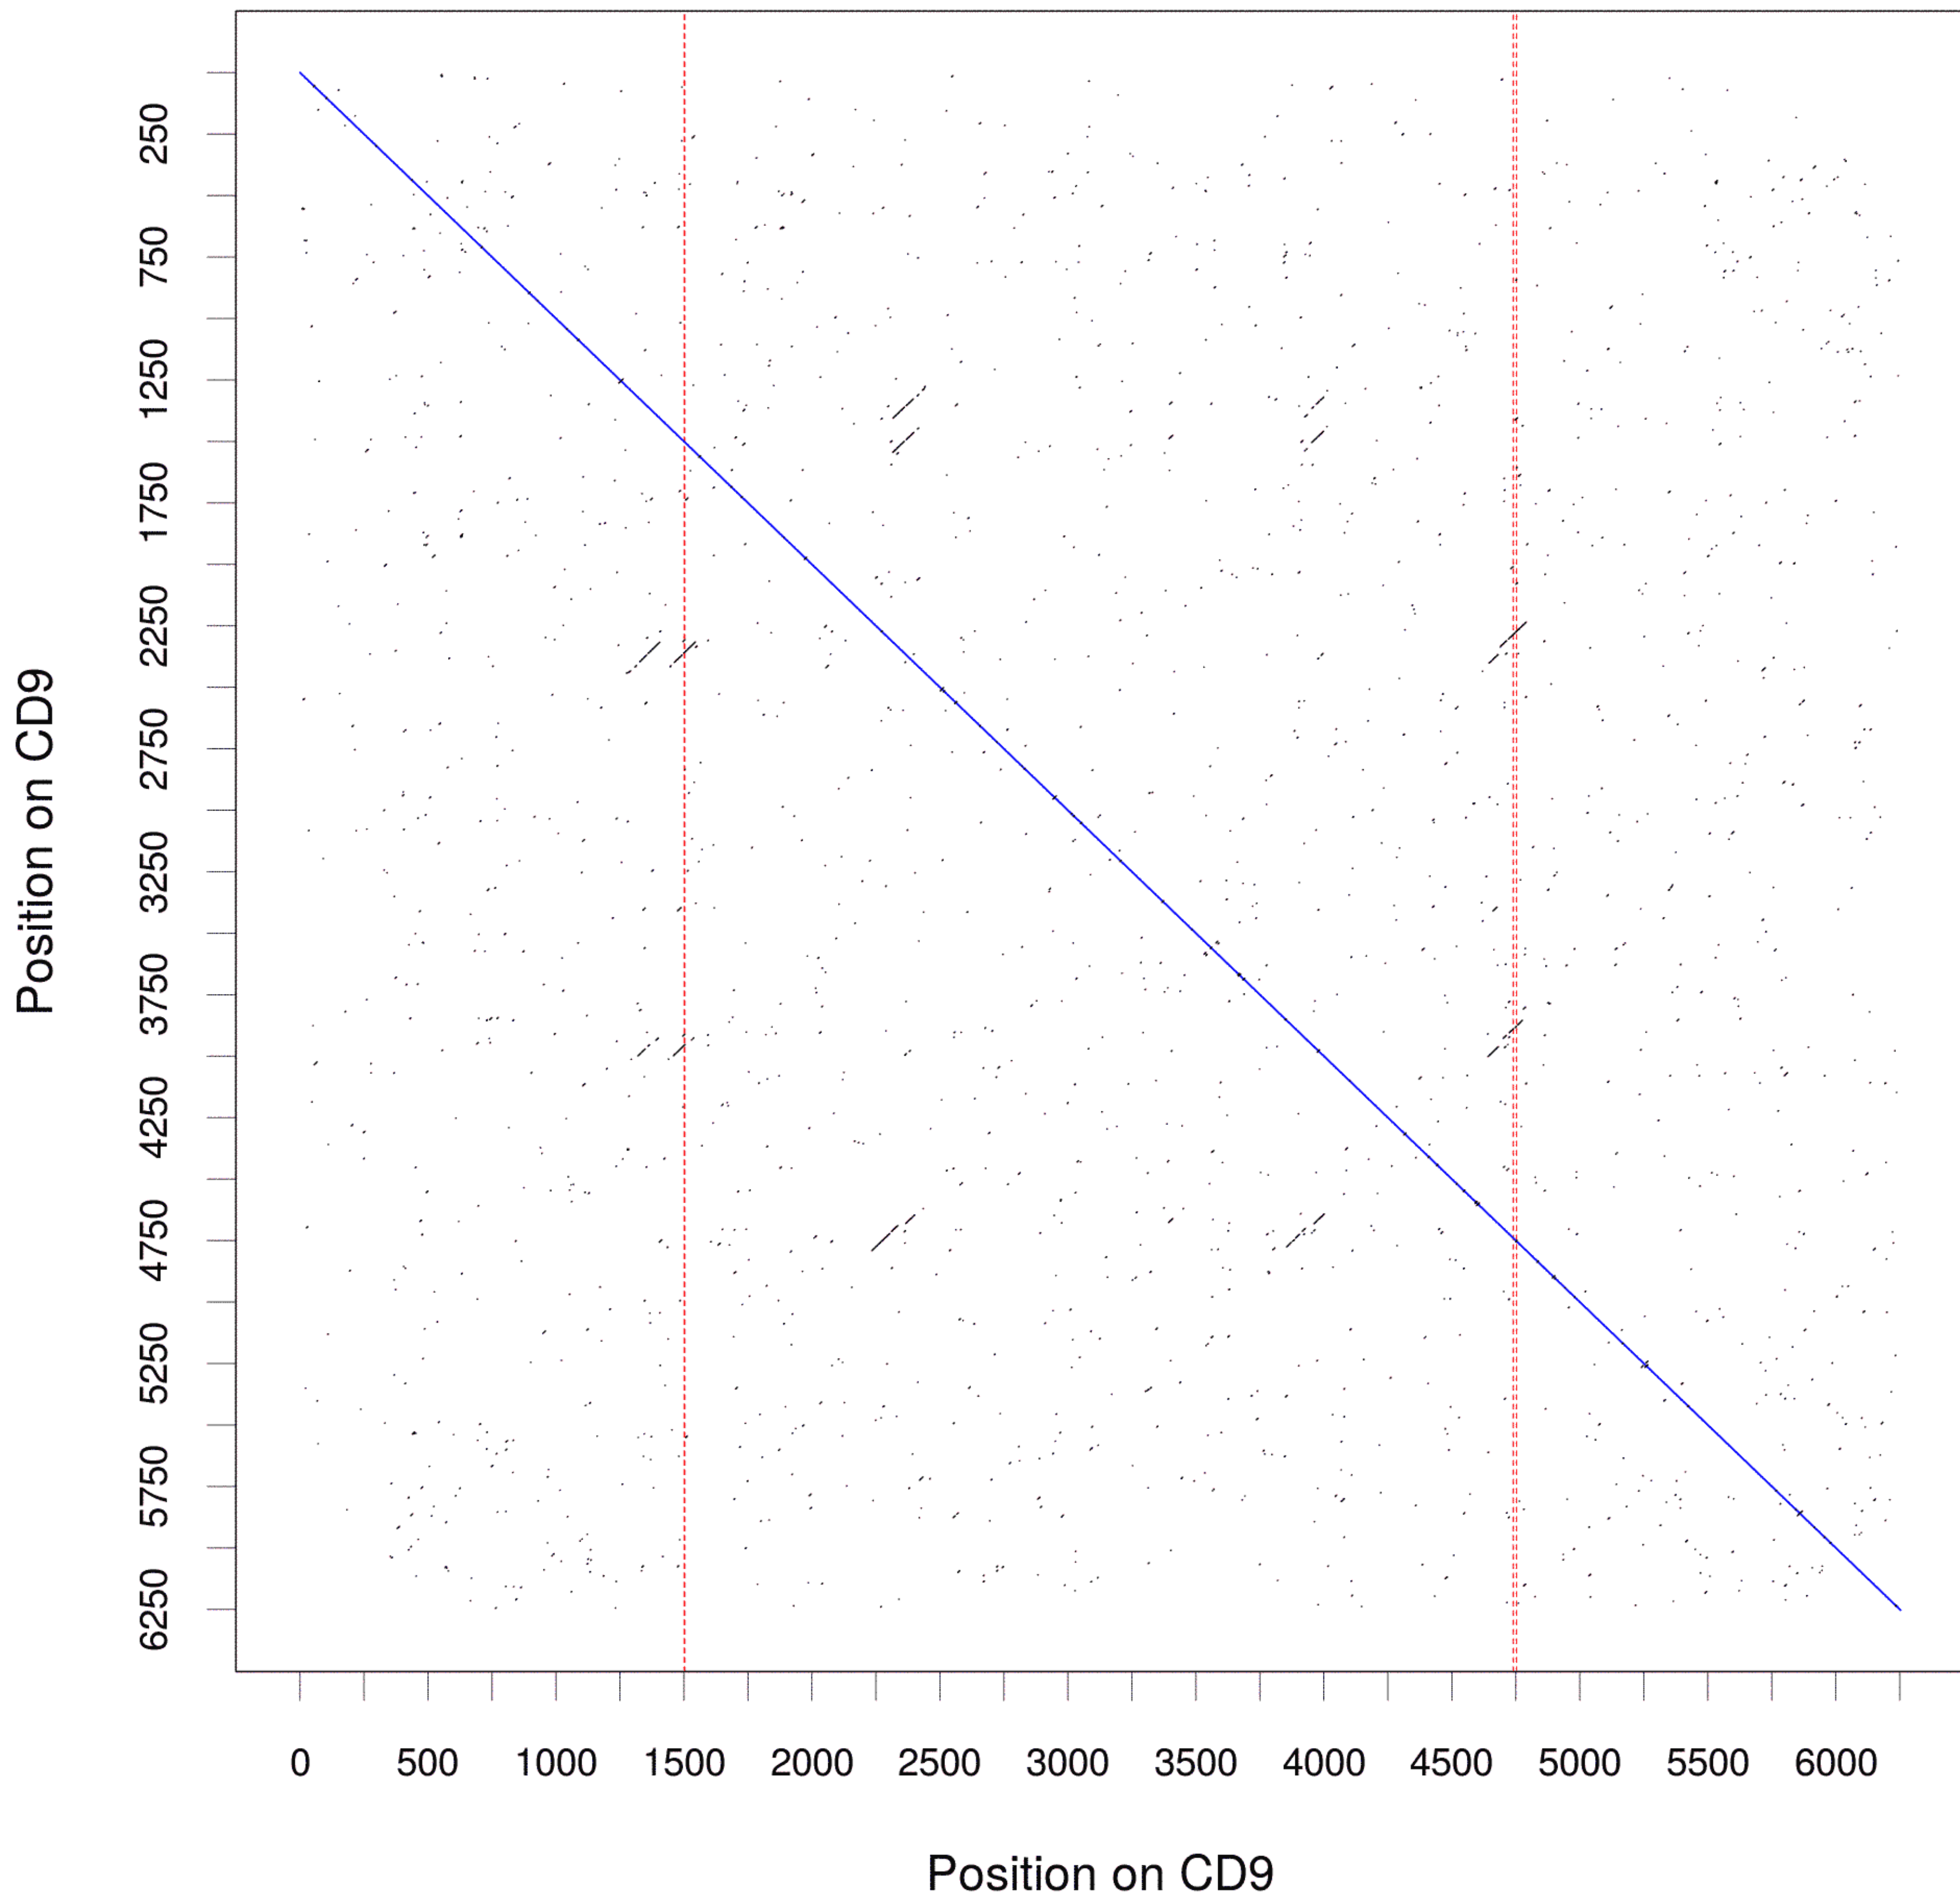



# CD46

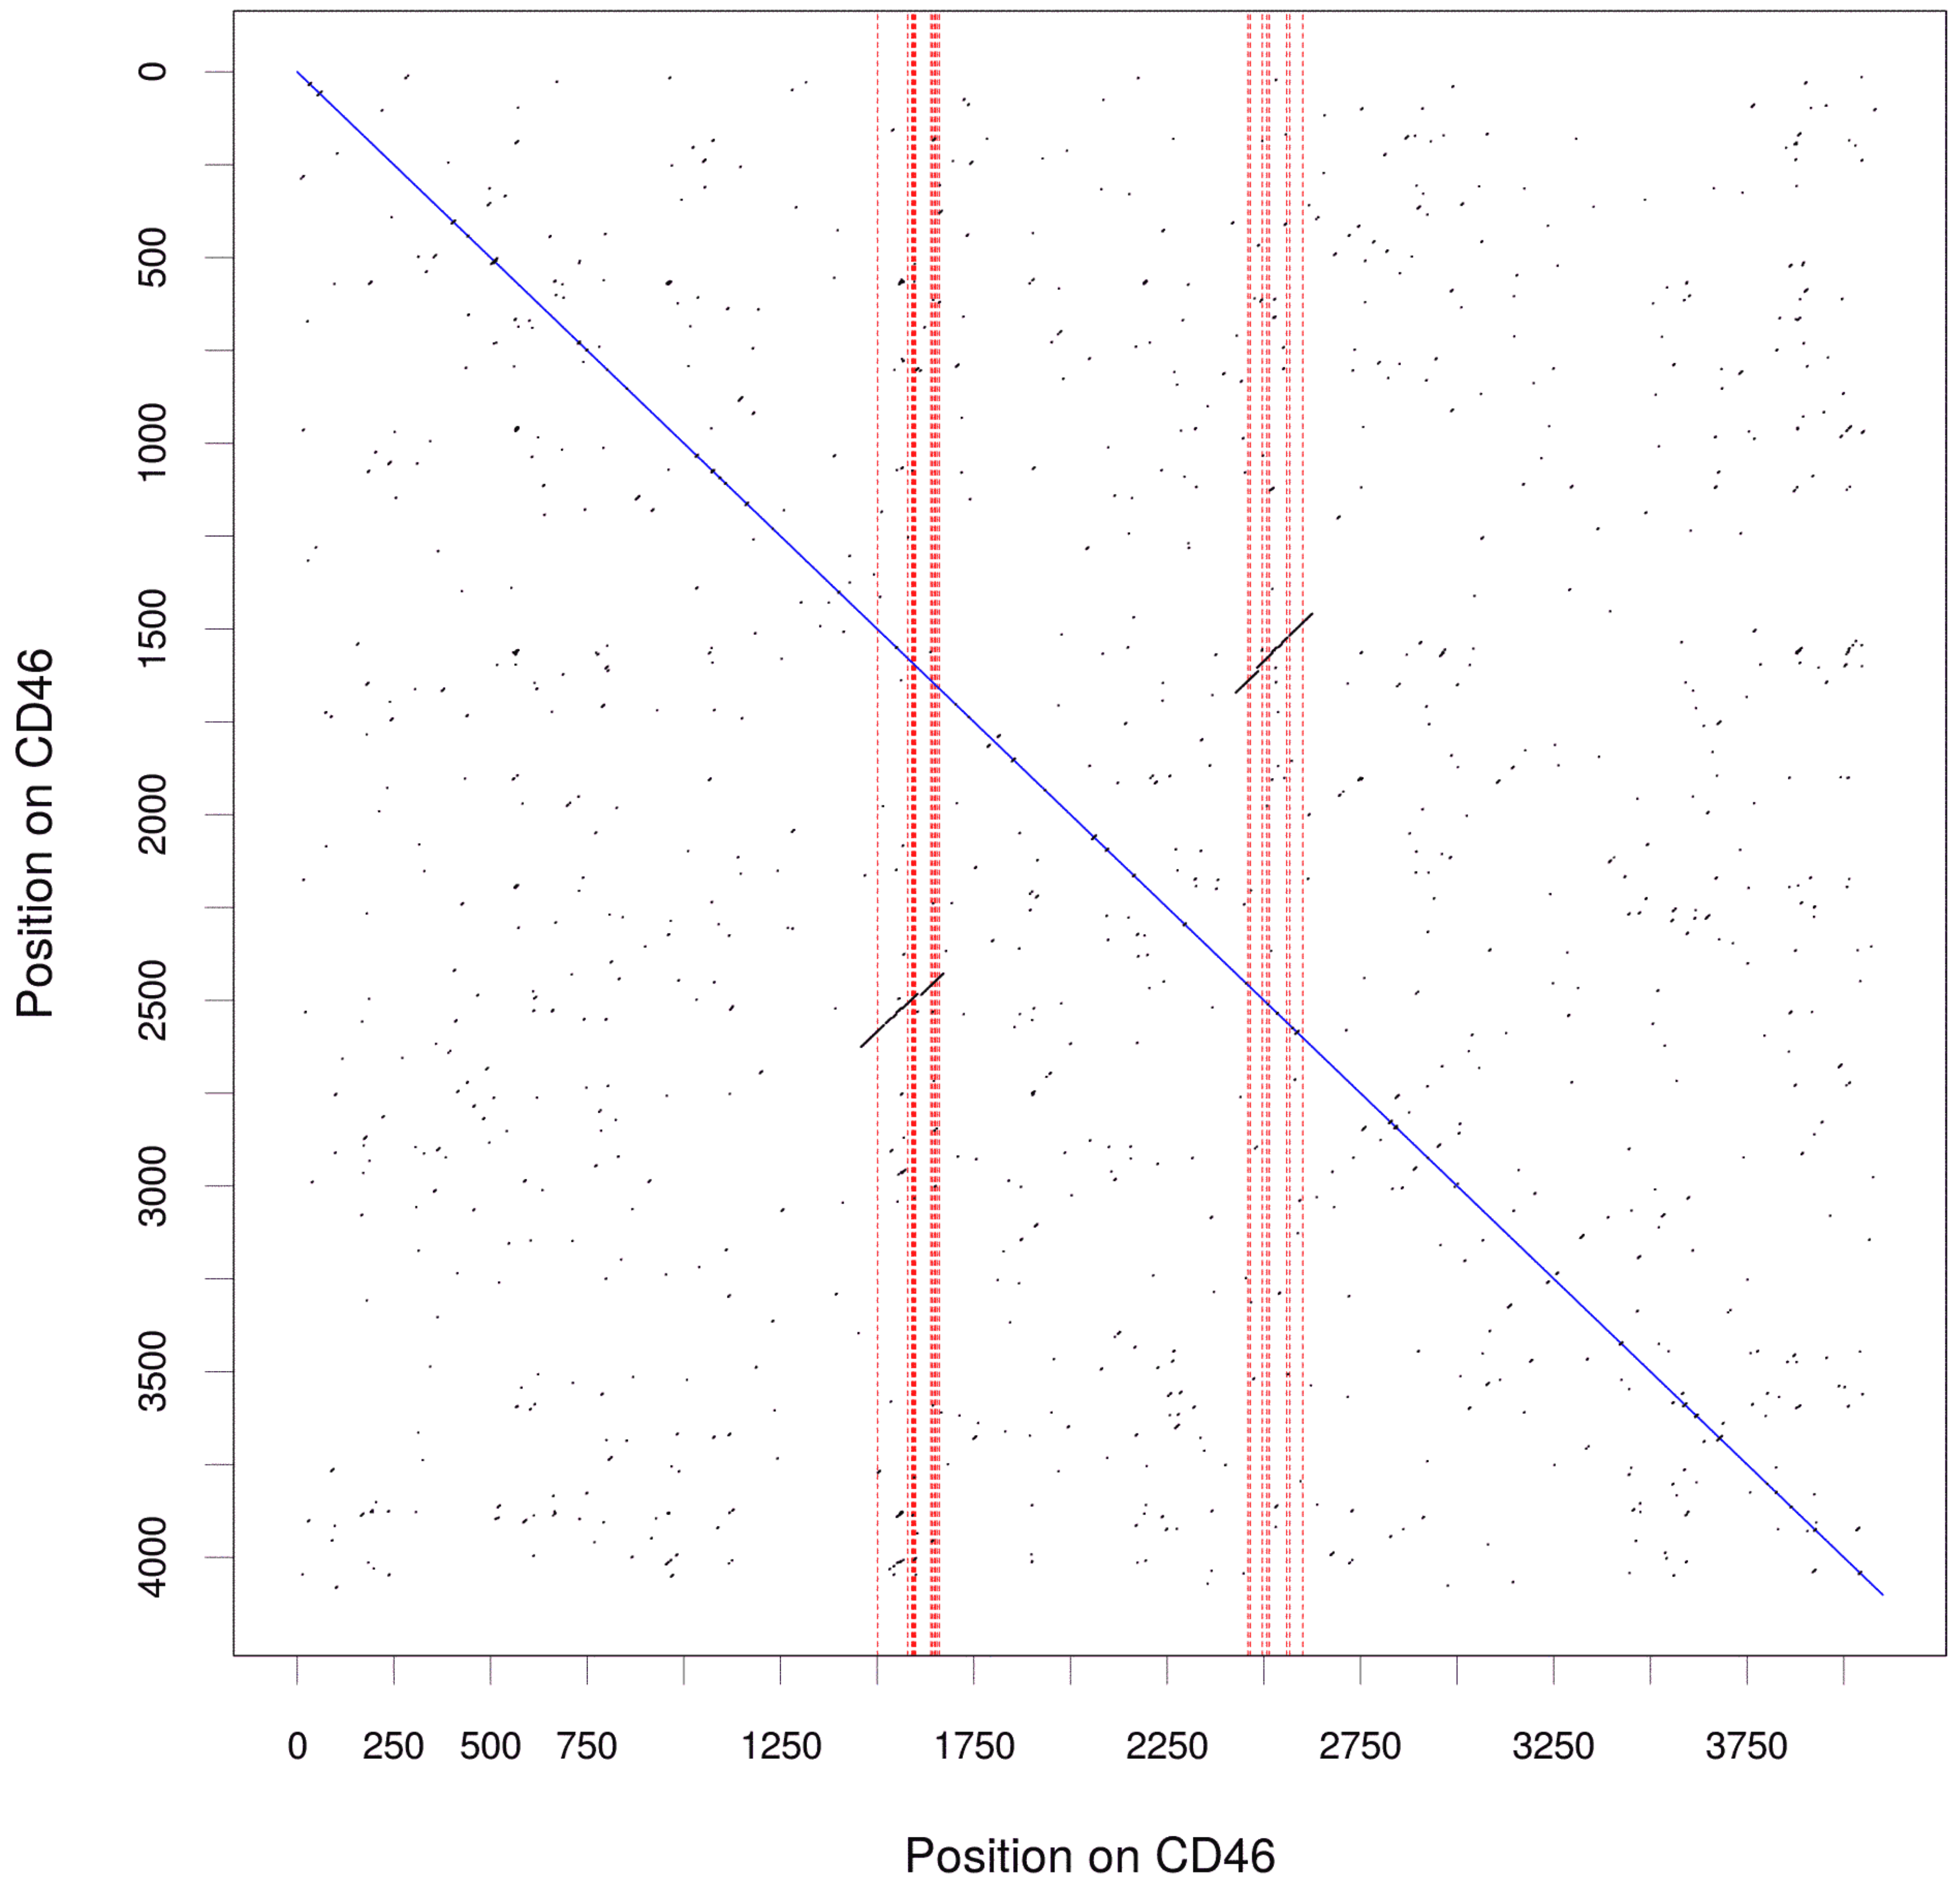

# CD47

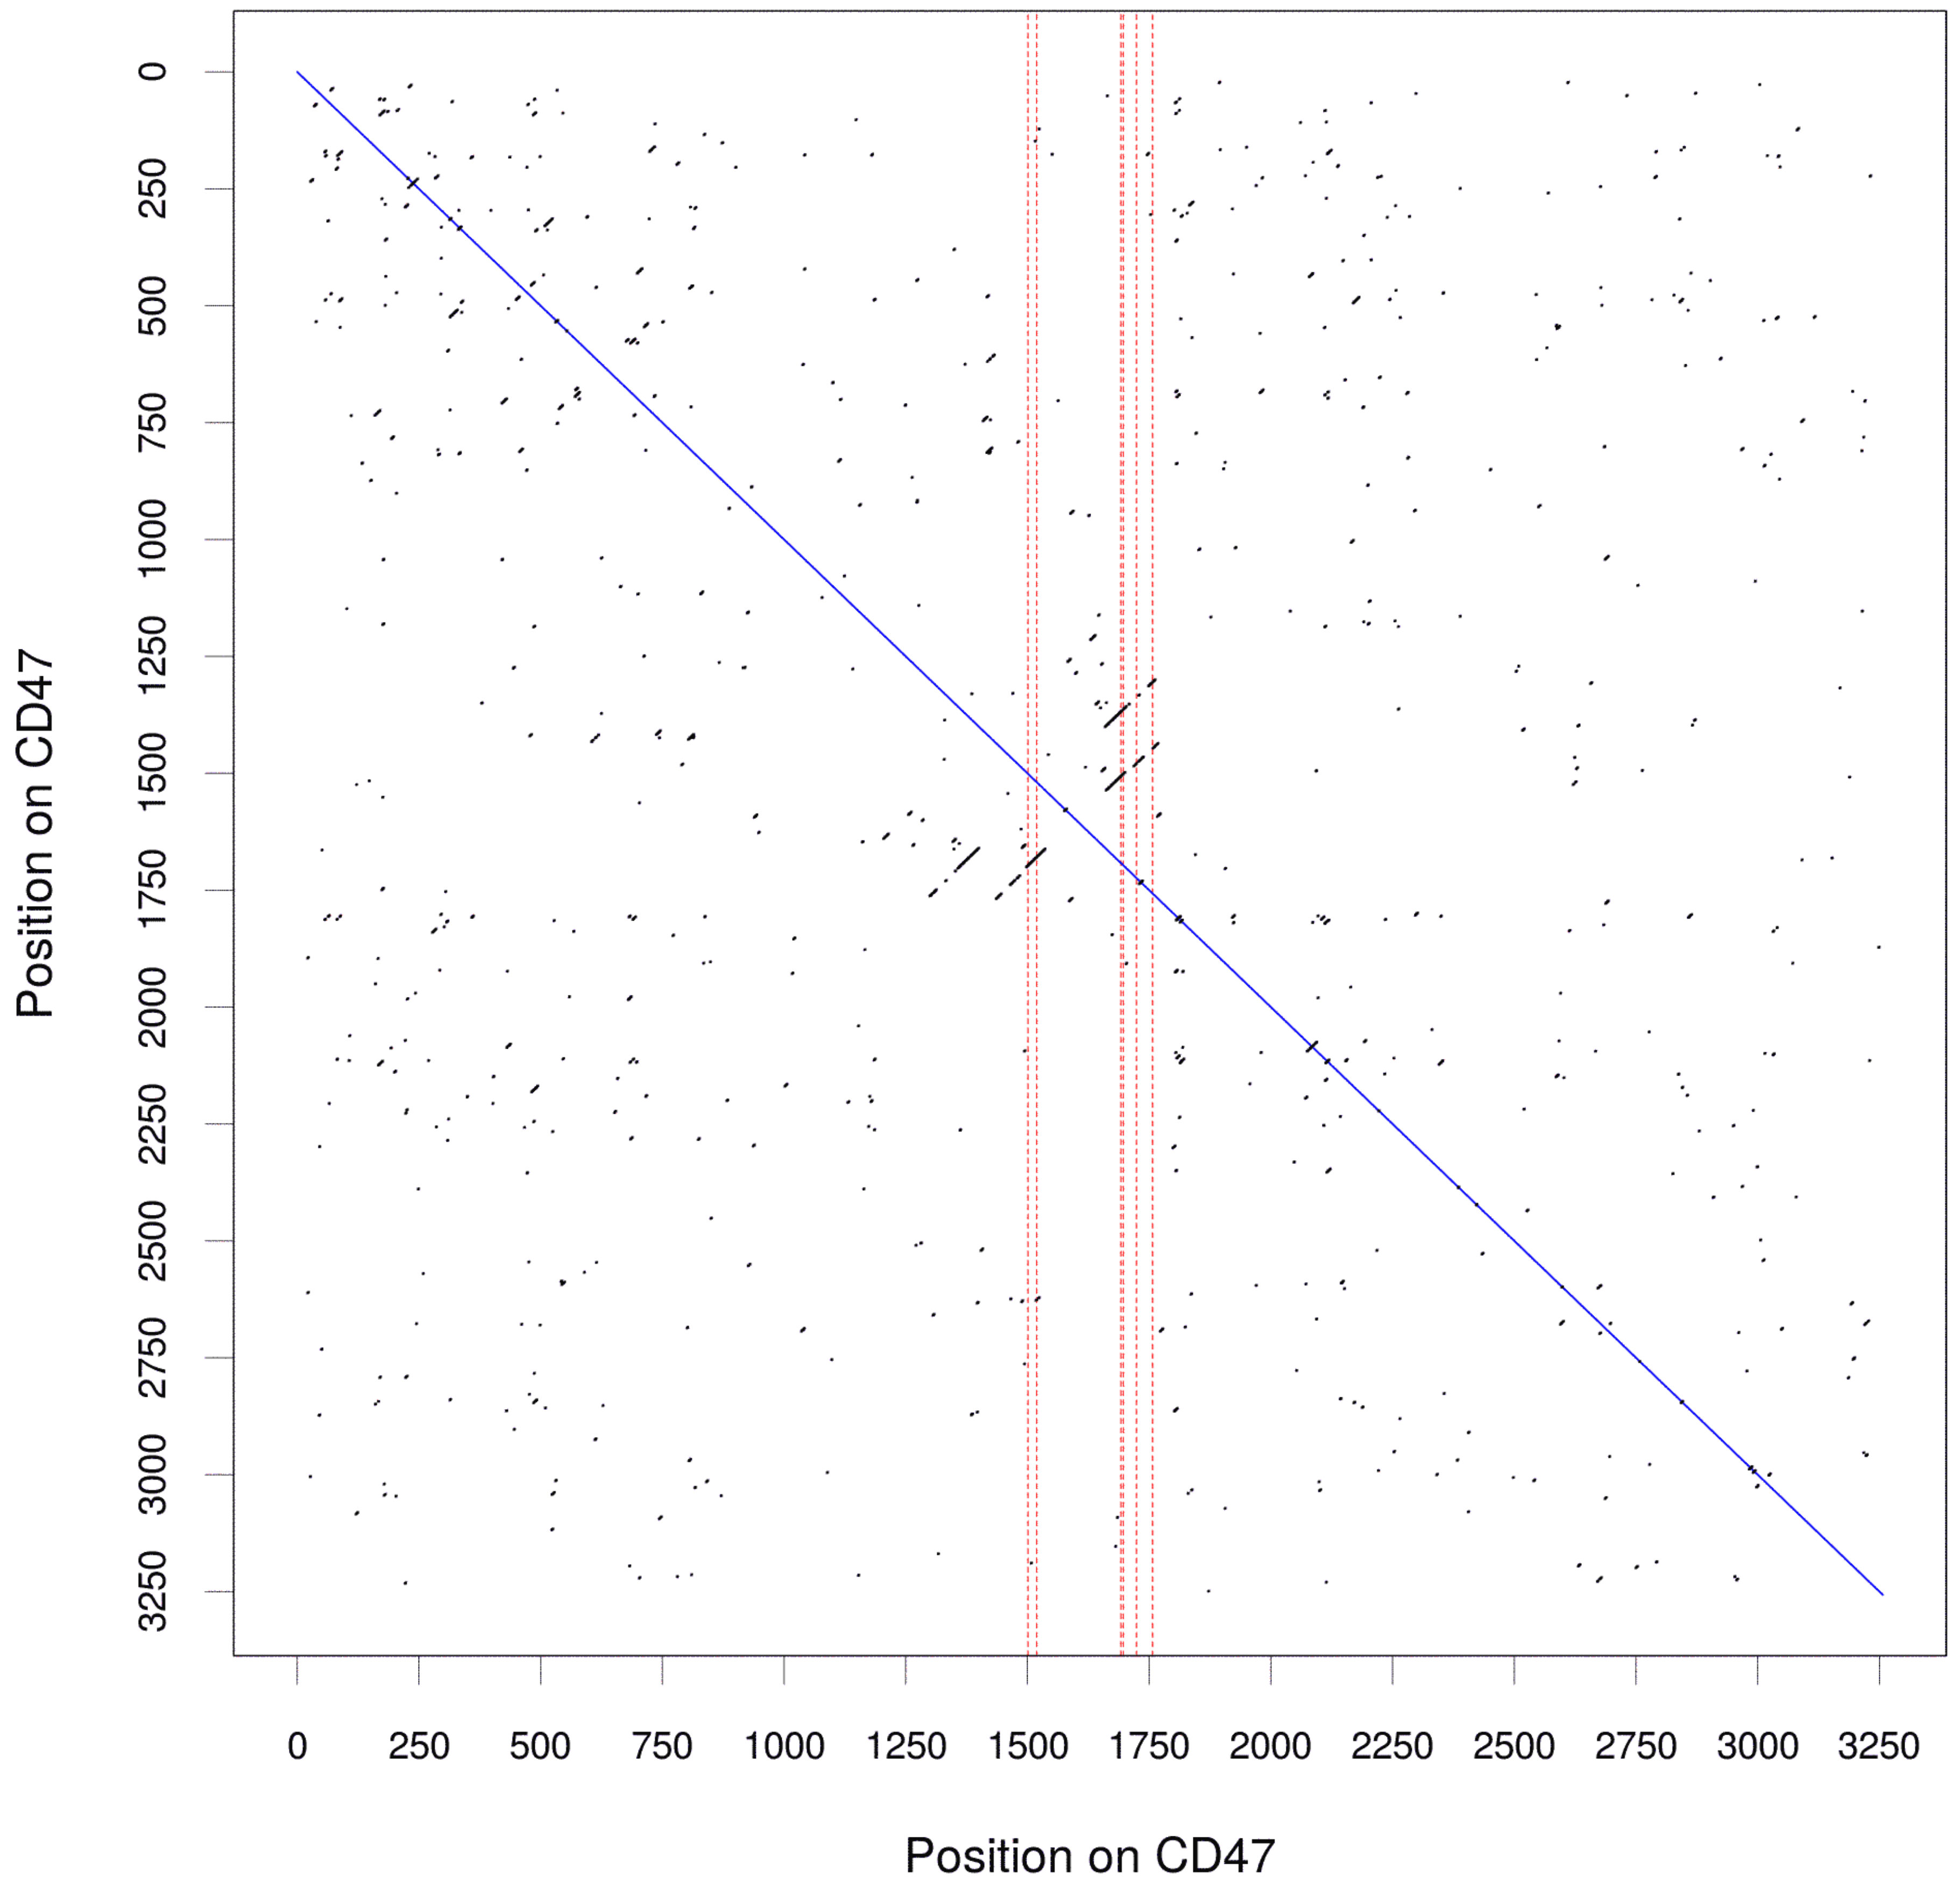

# CD164

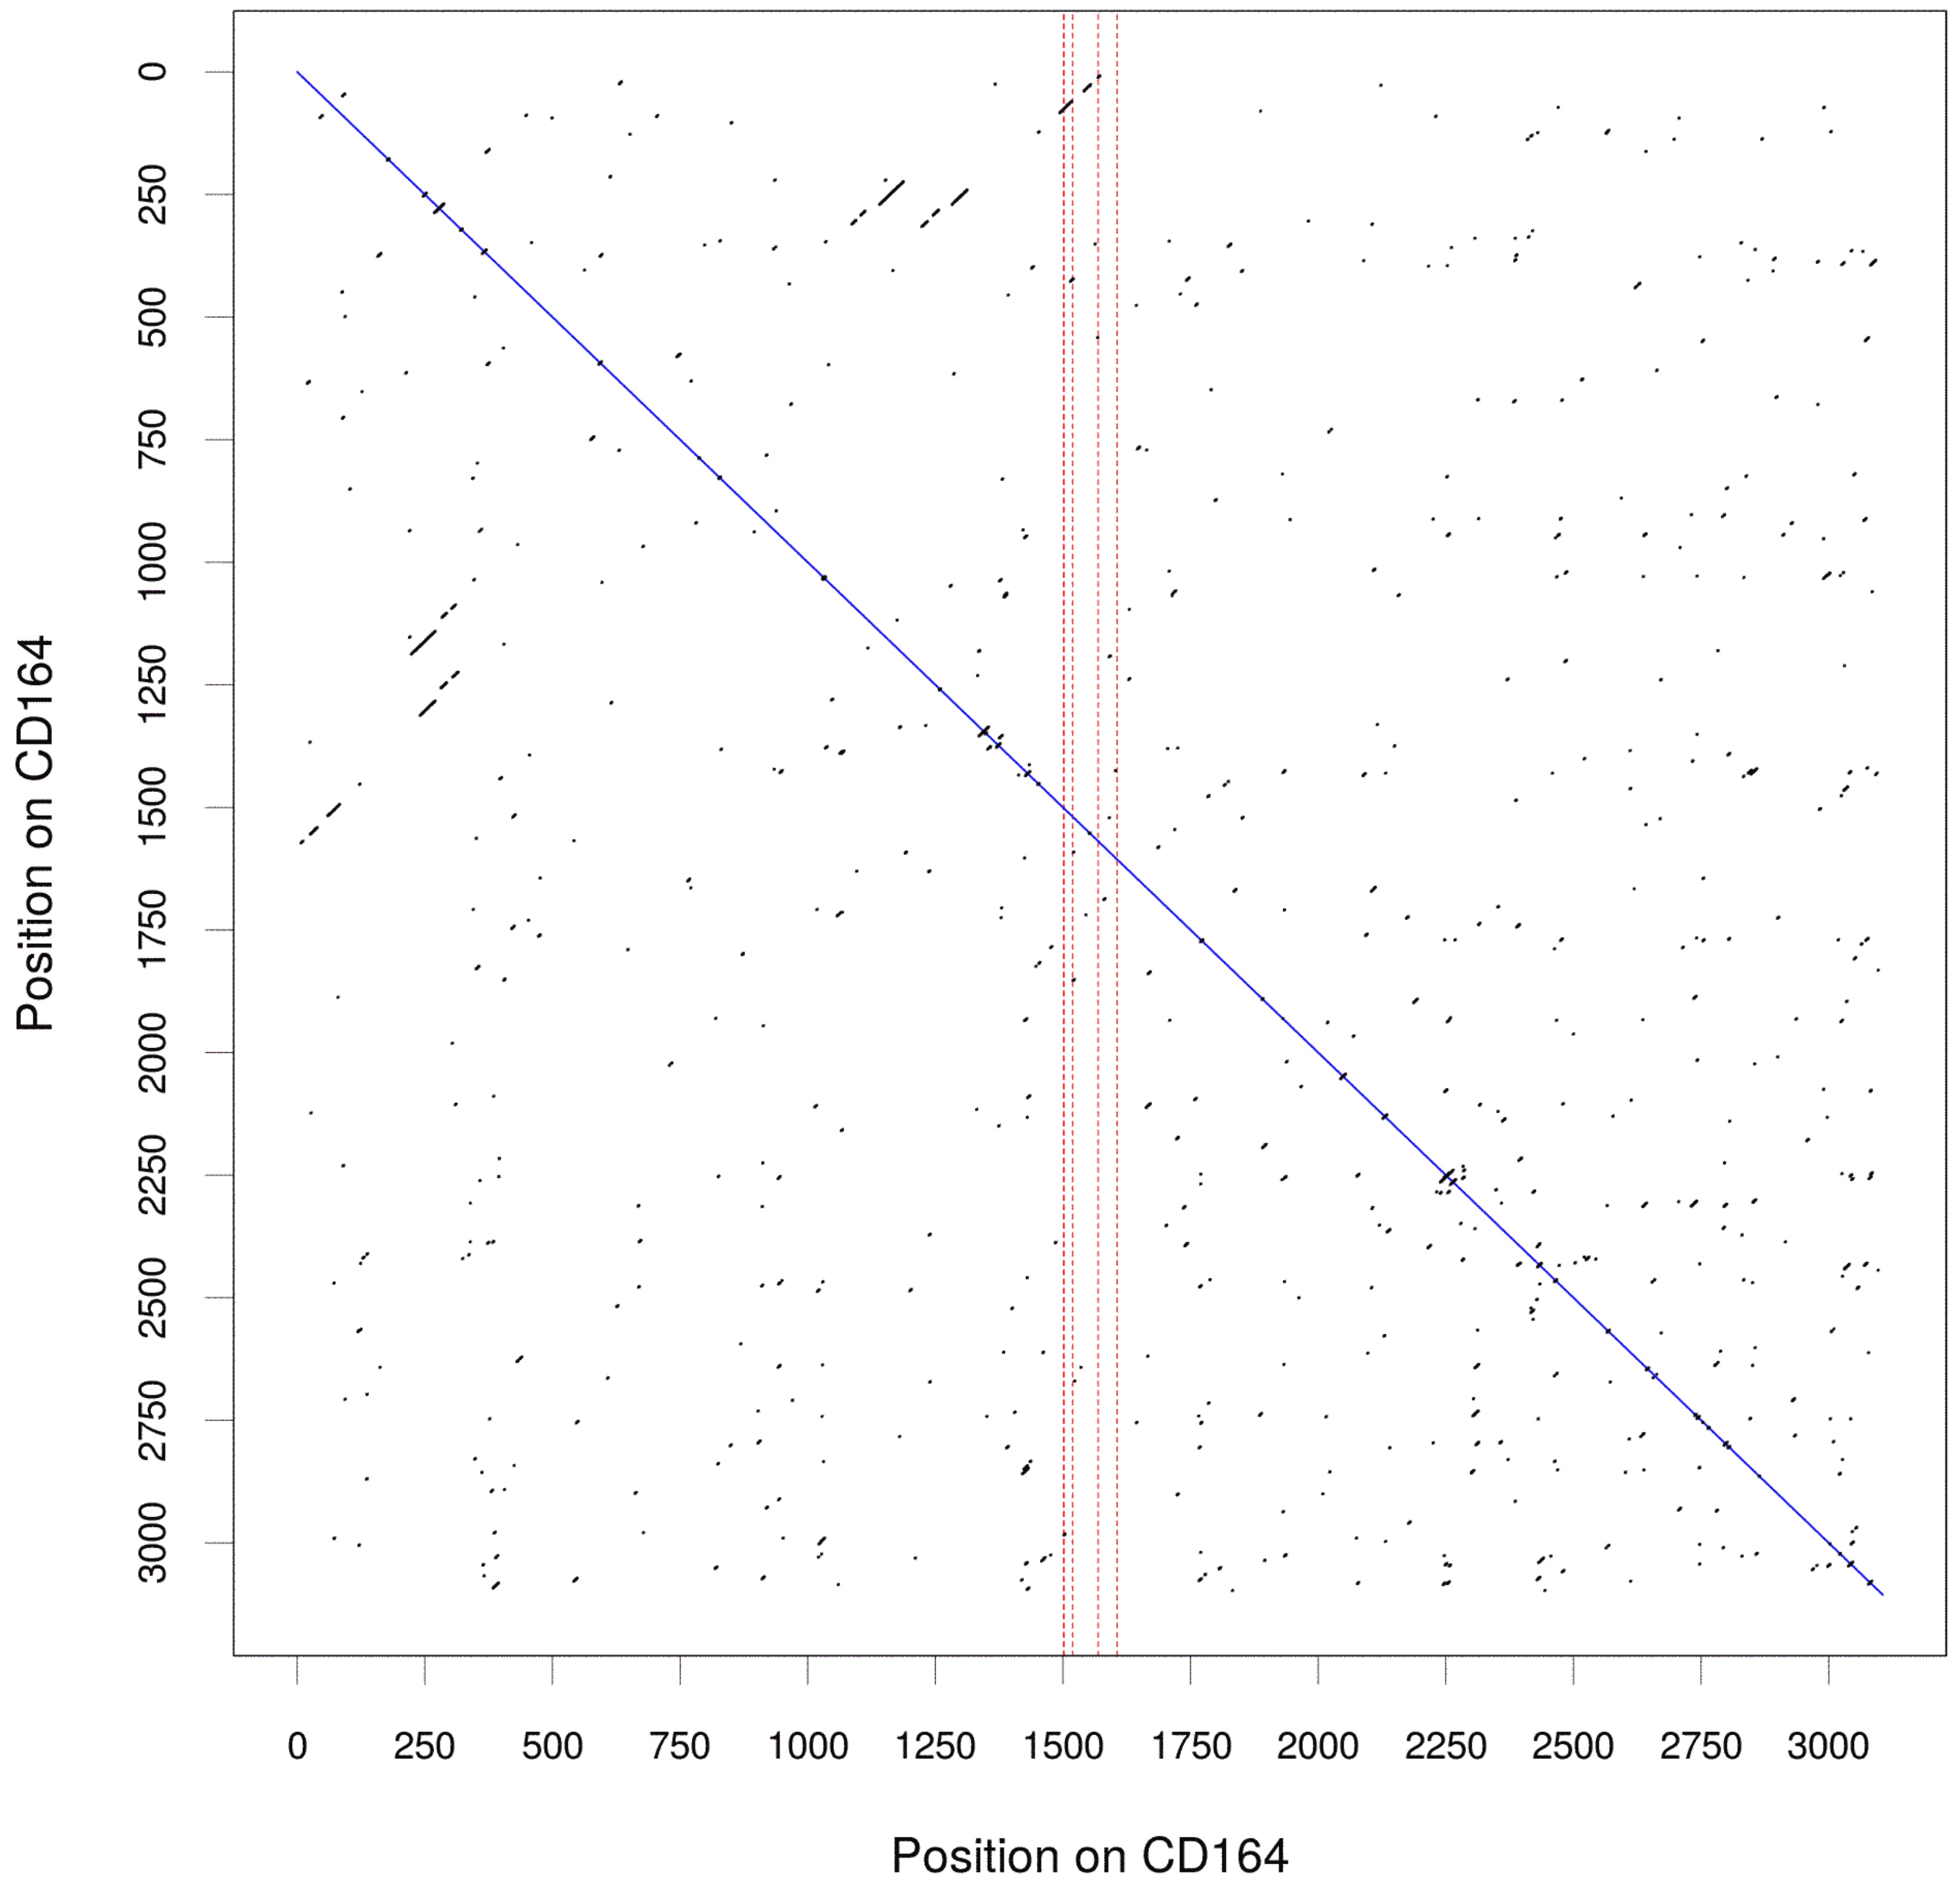

# CD276

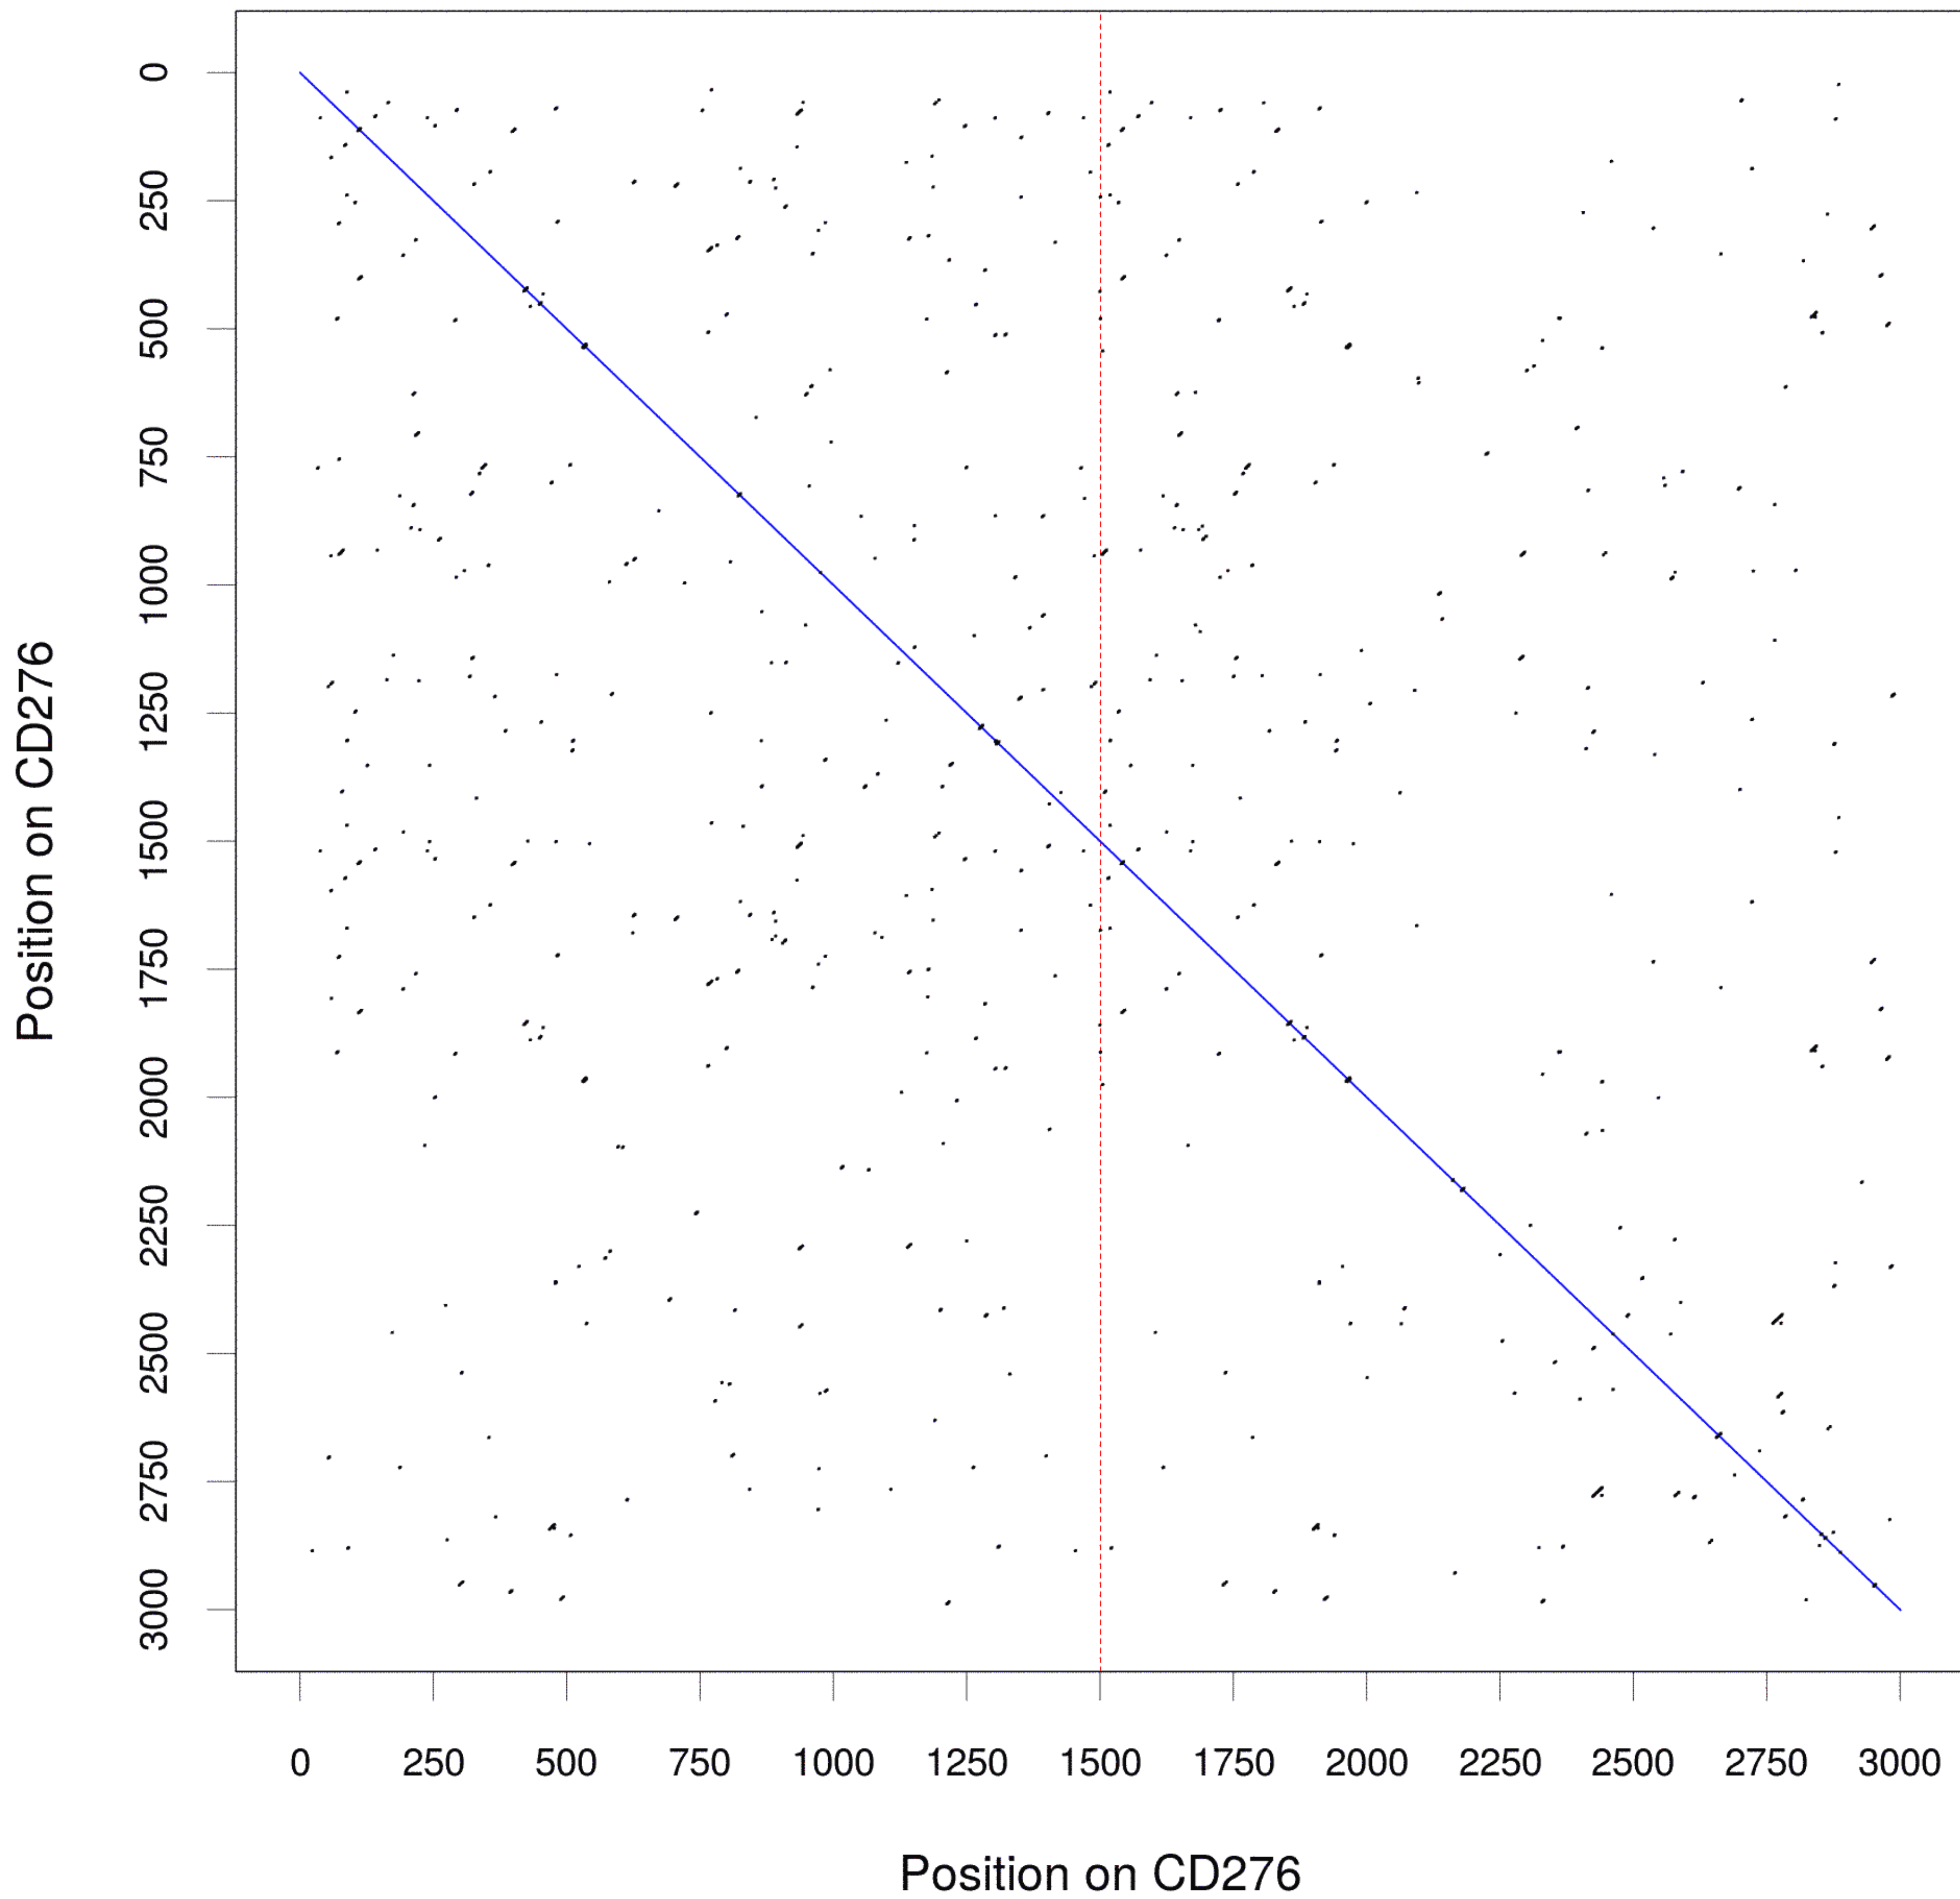

# CD300LG

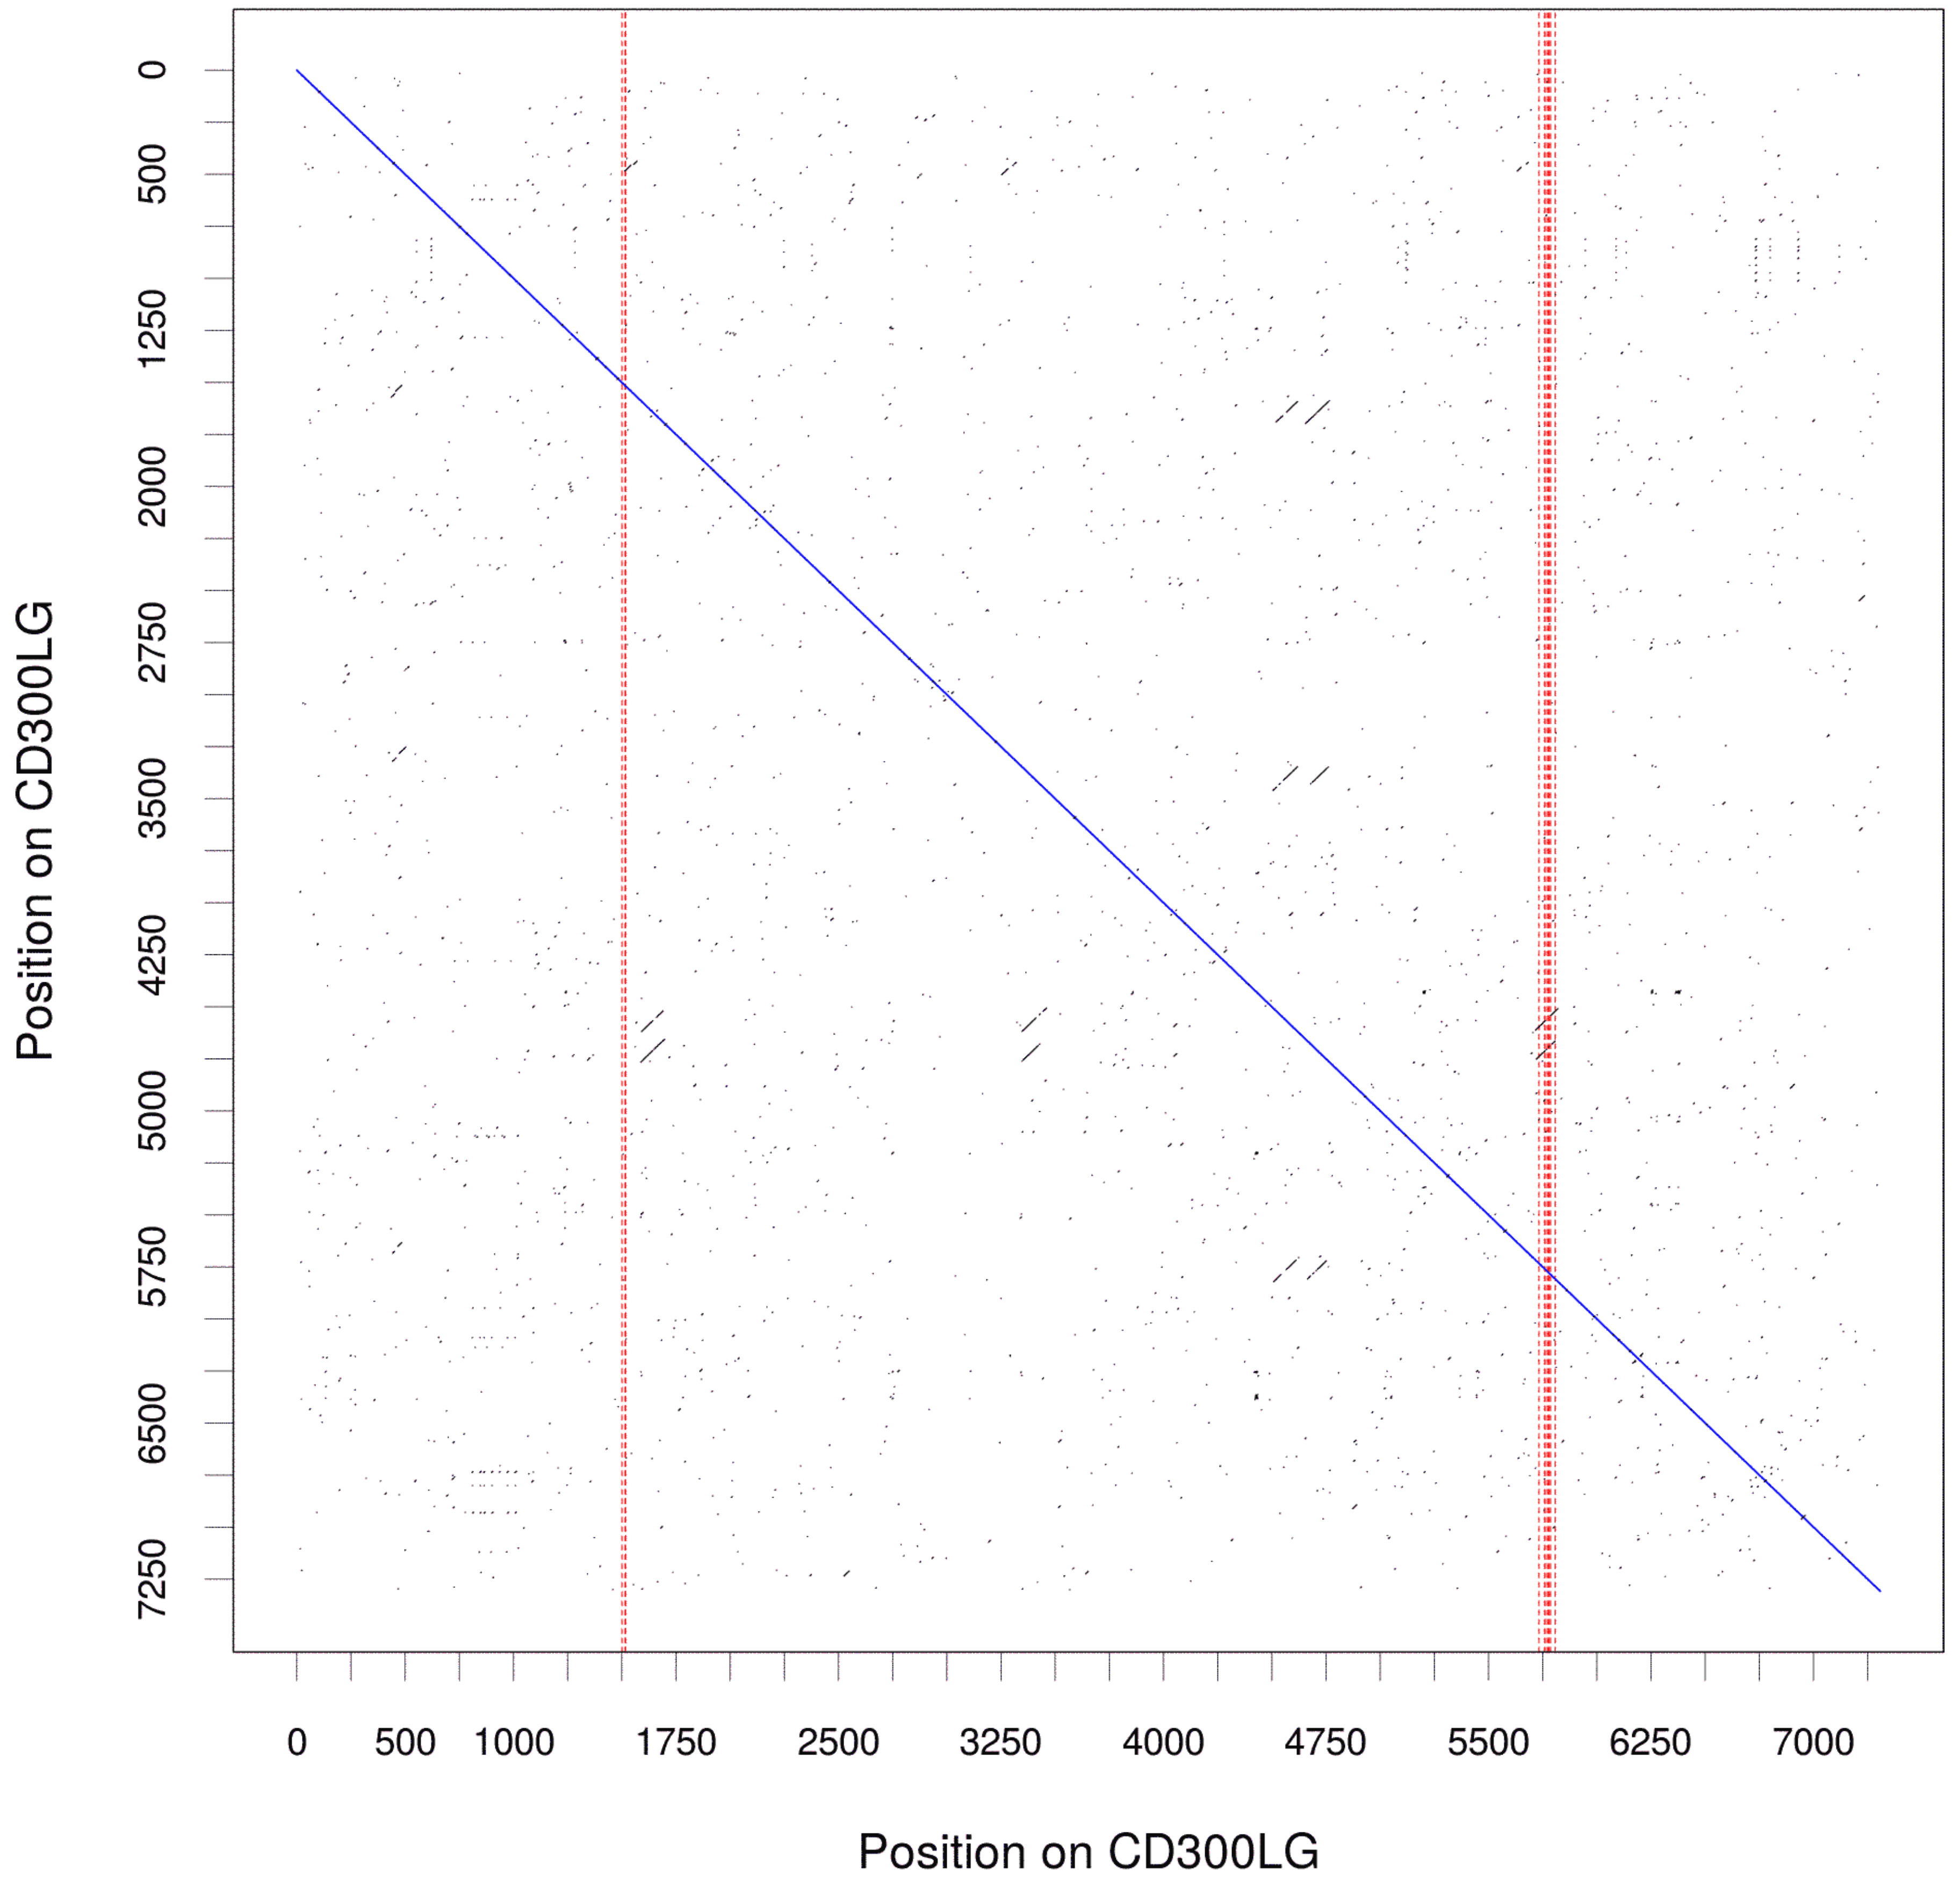

# CDC16

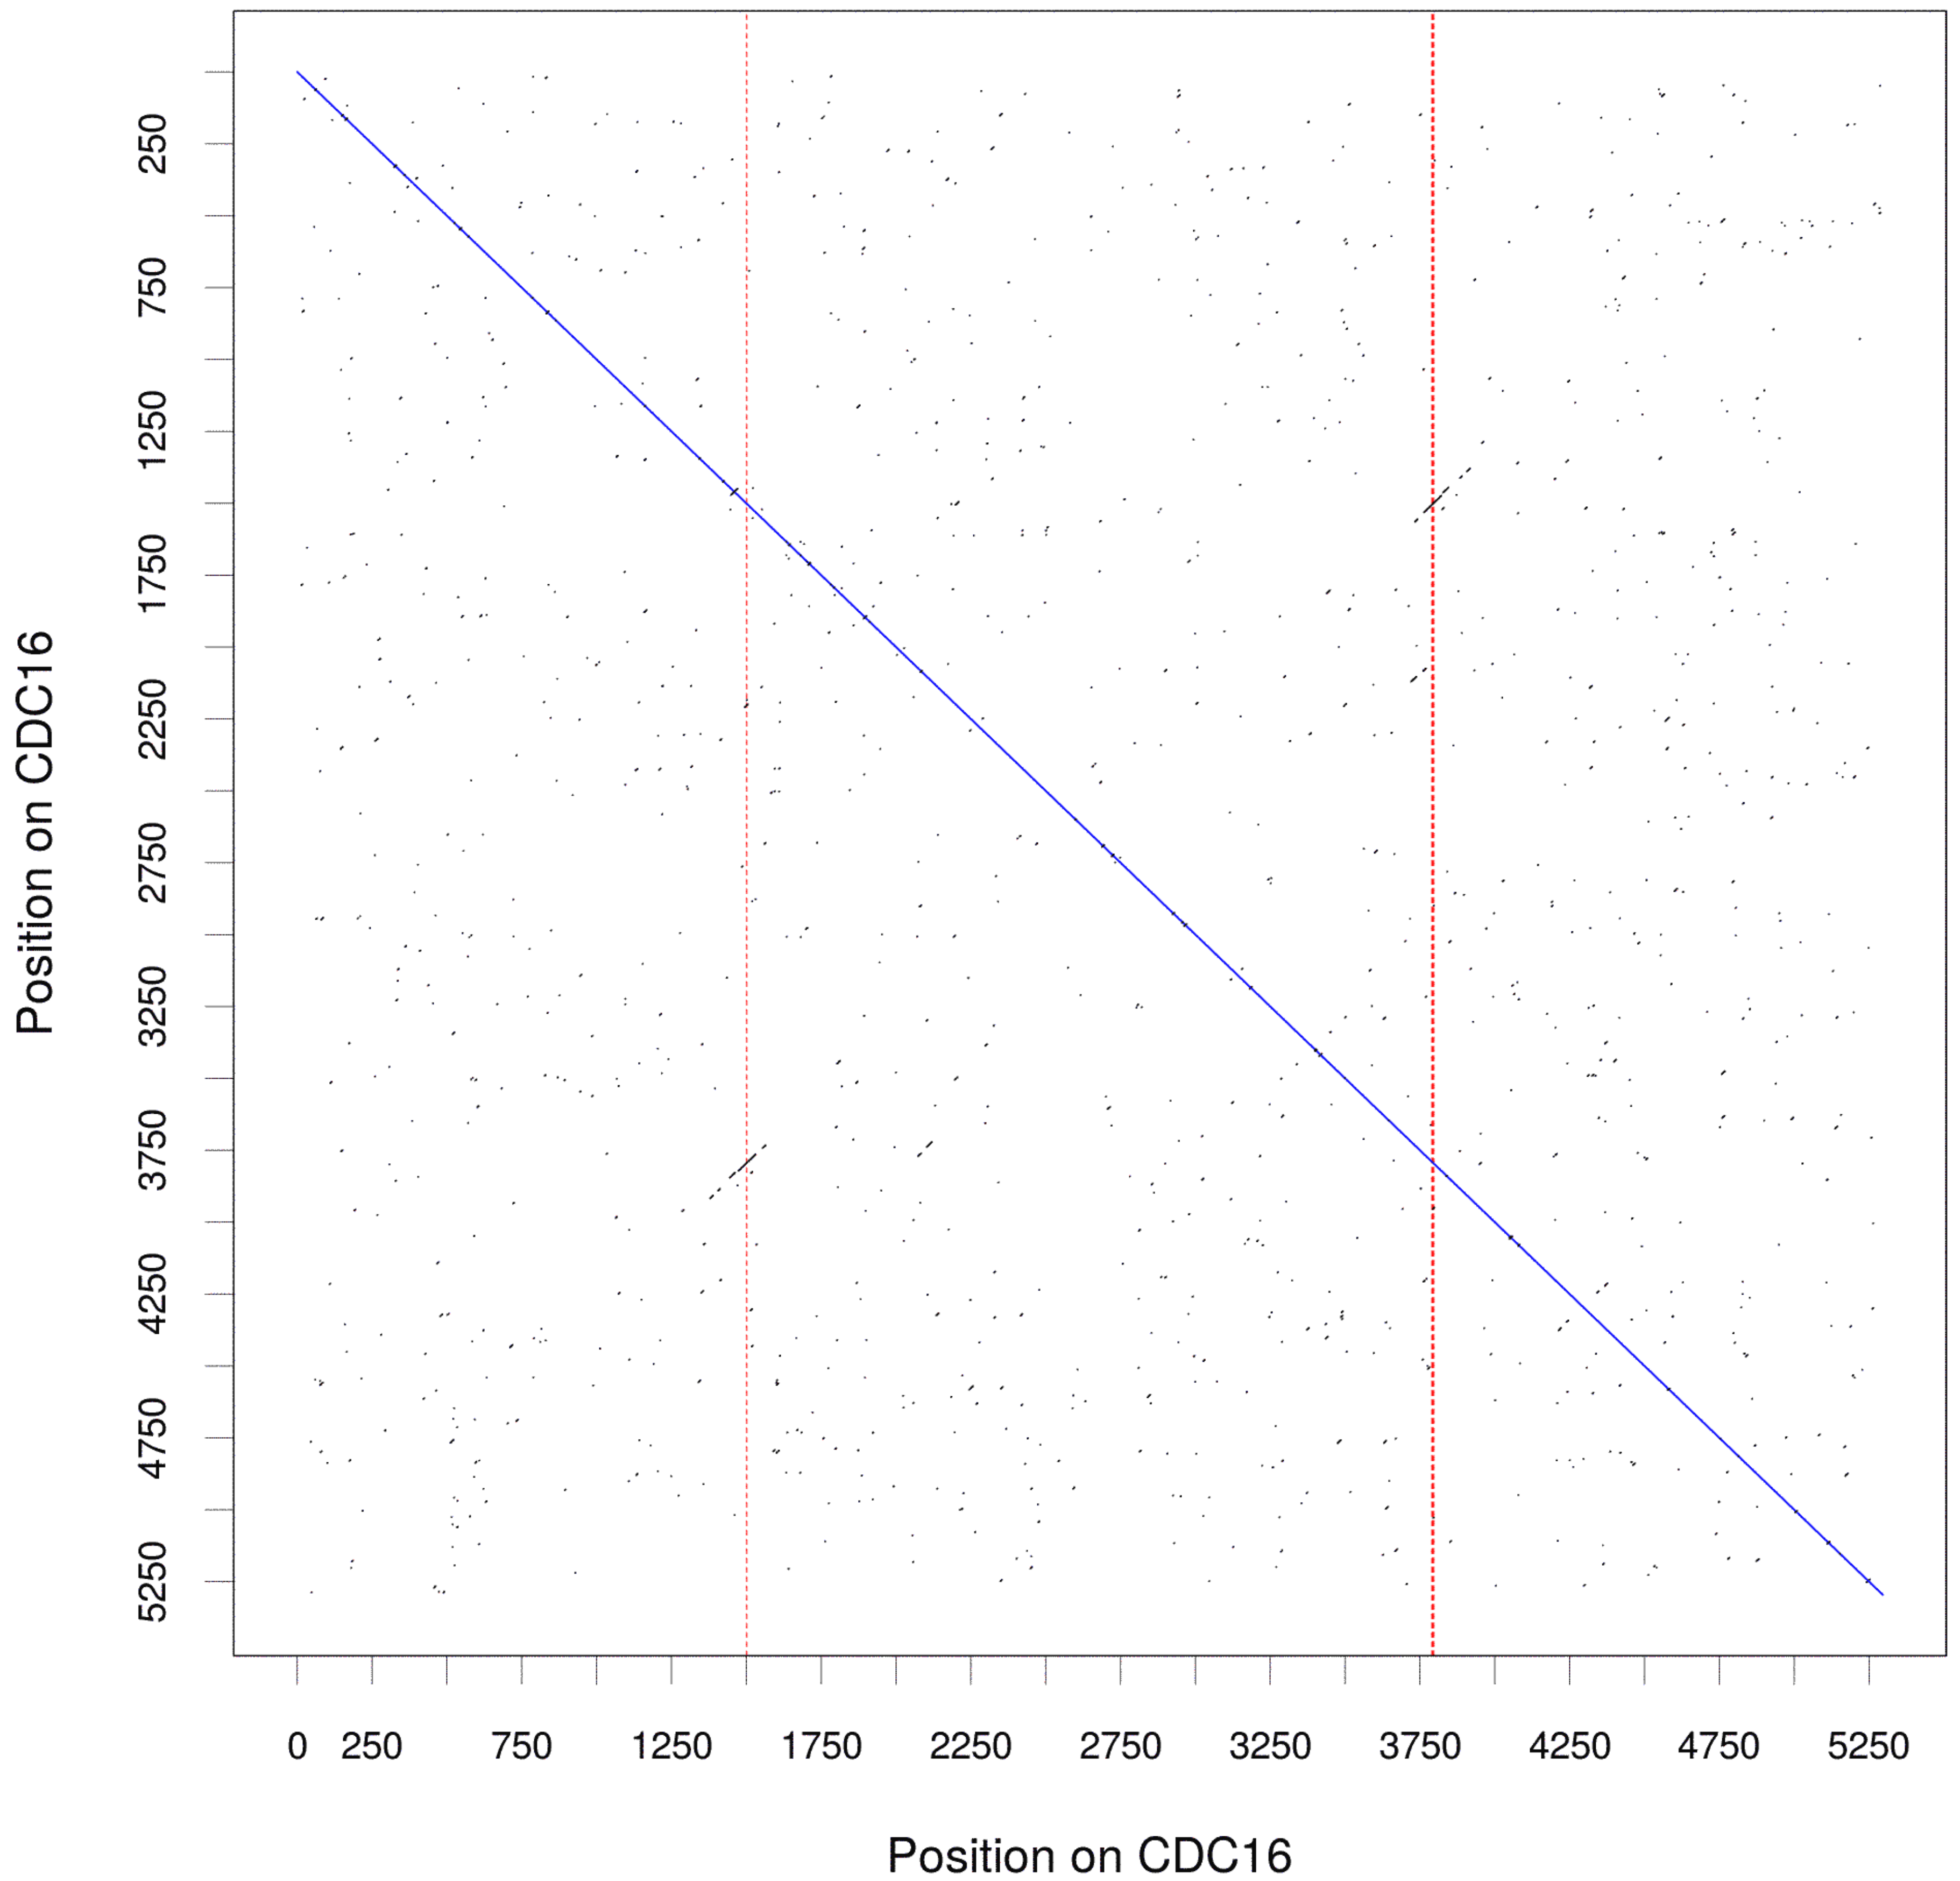

# CDK20

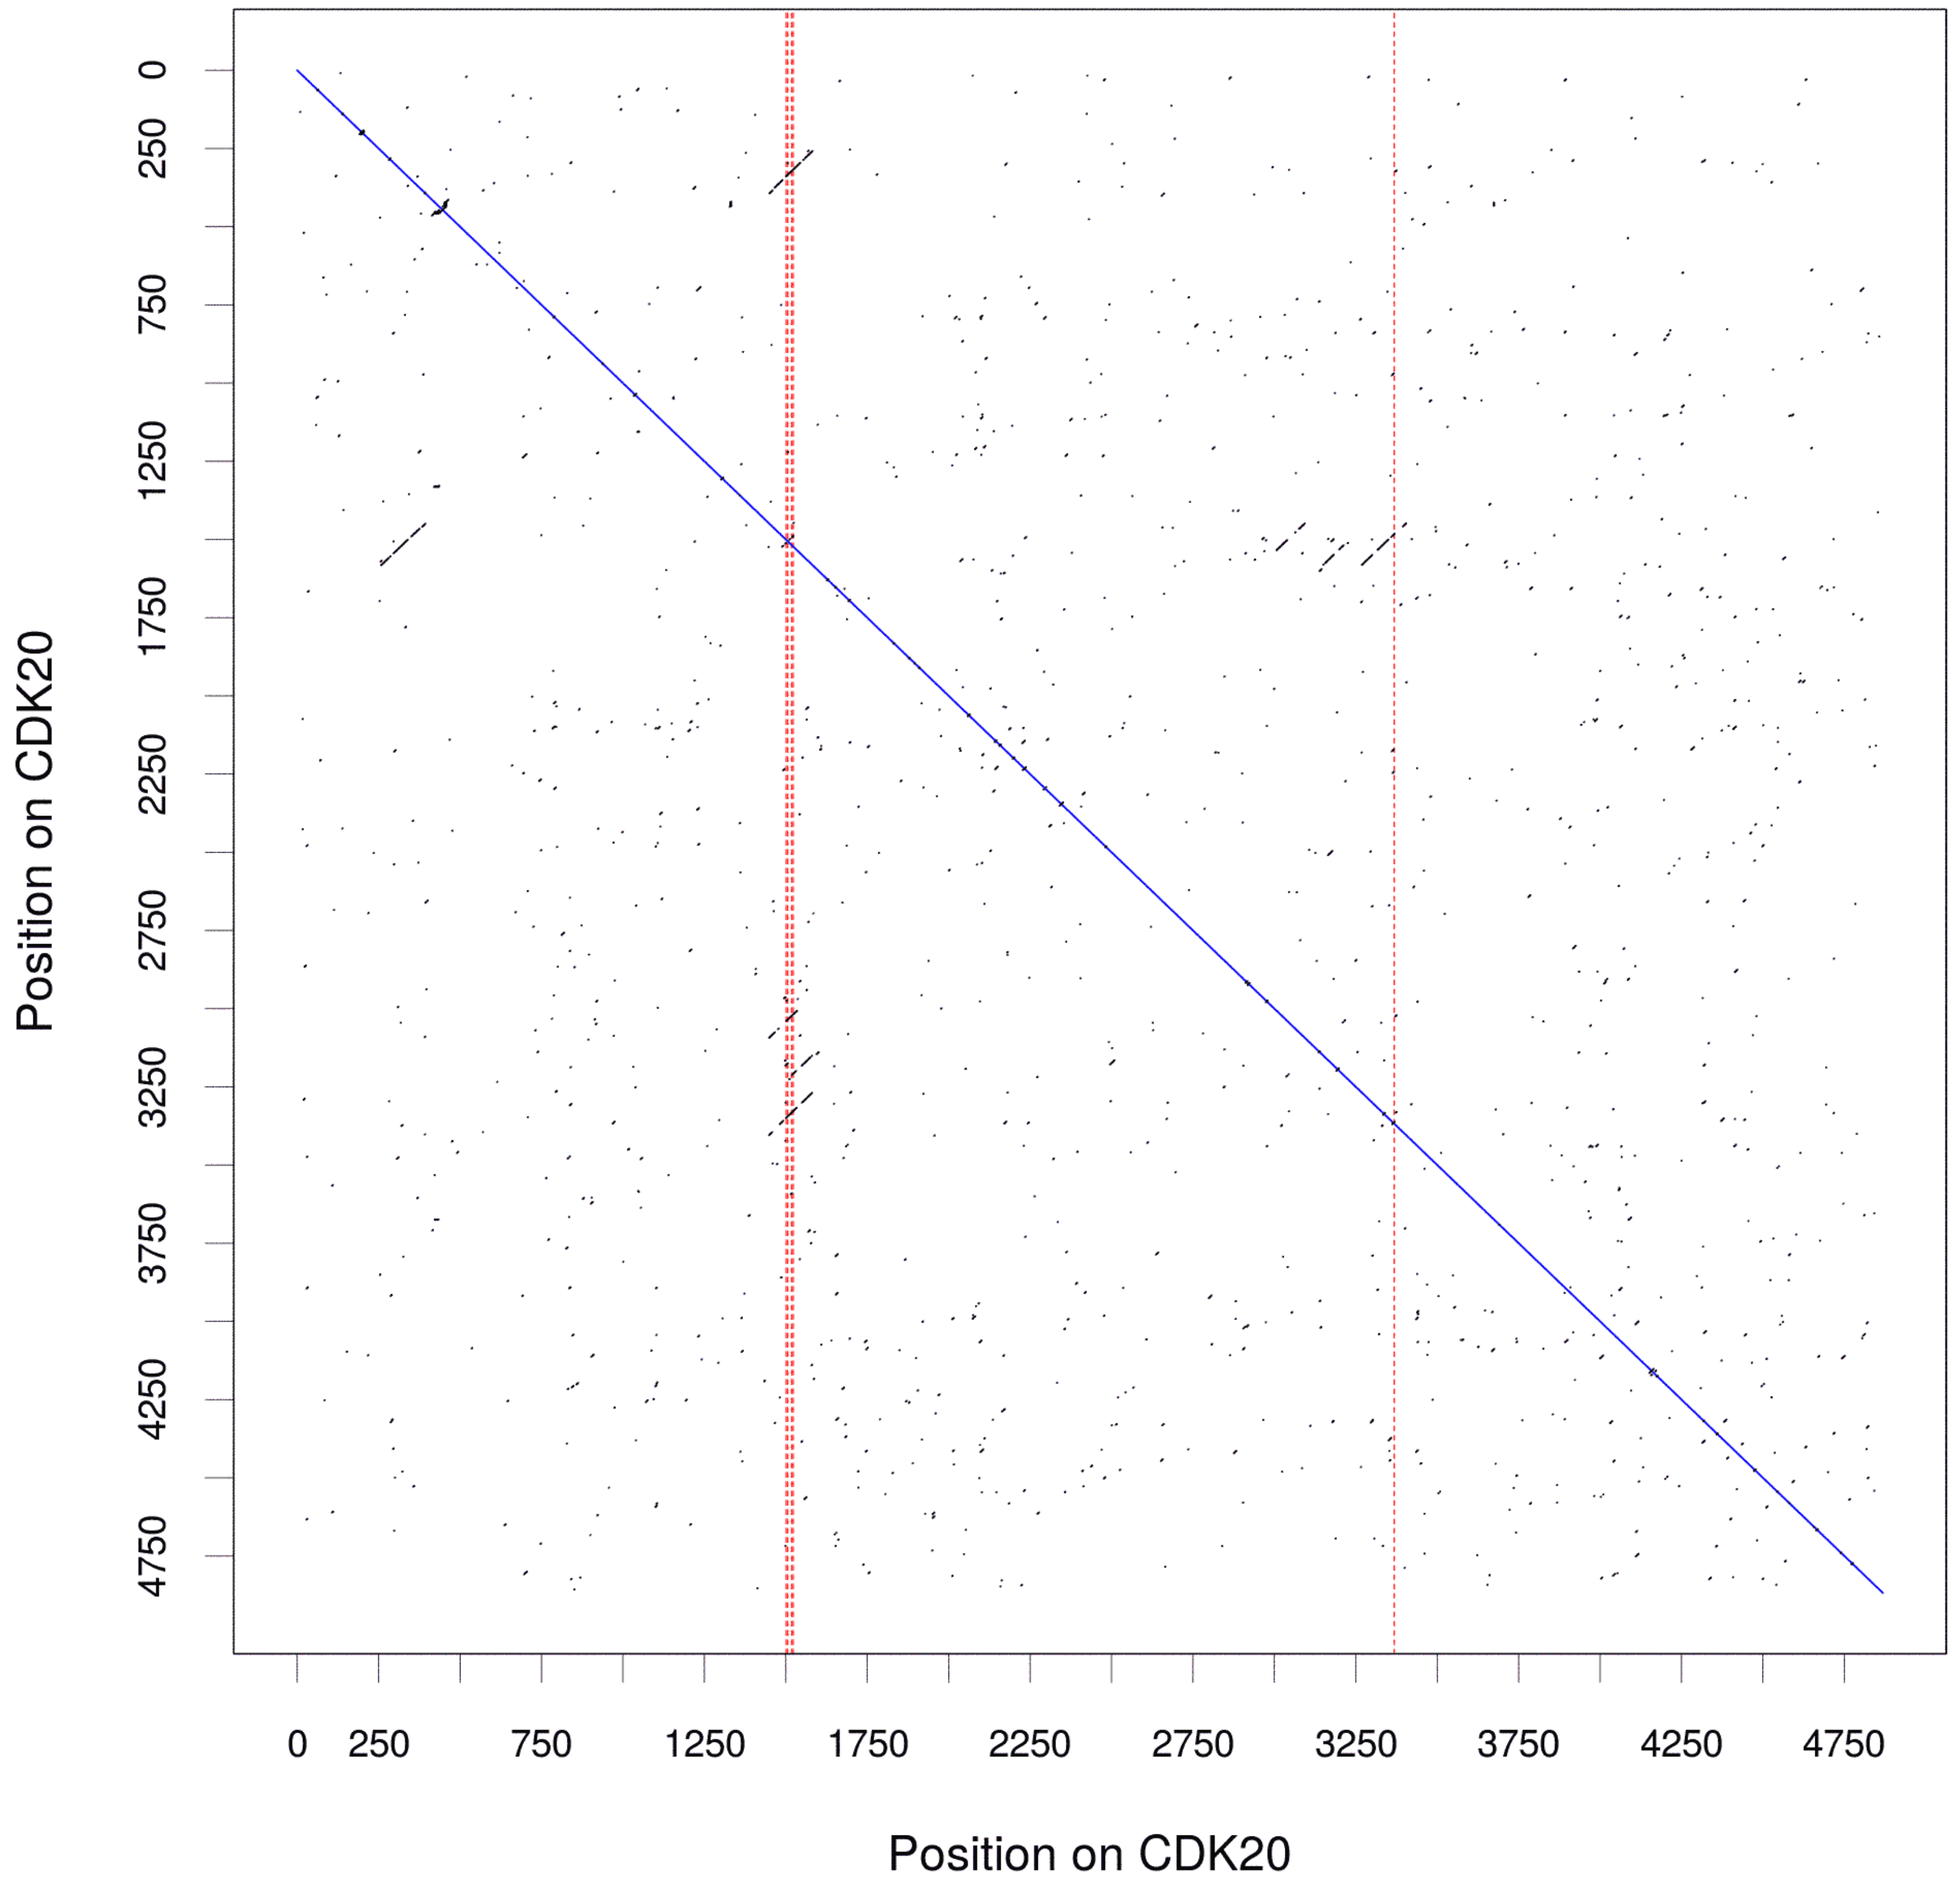

# CENPN

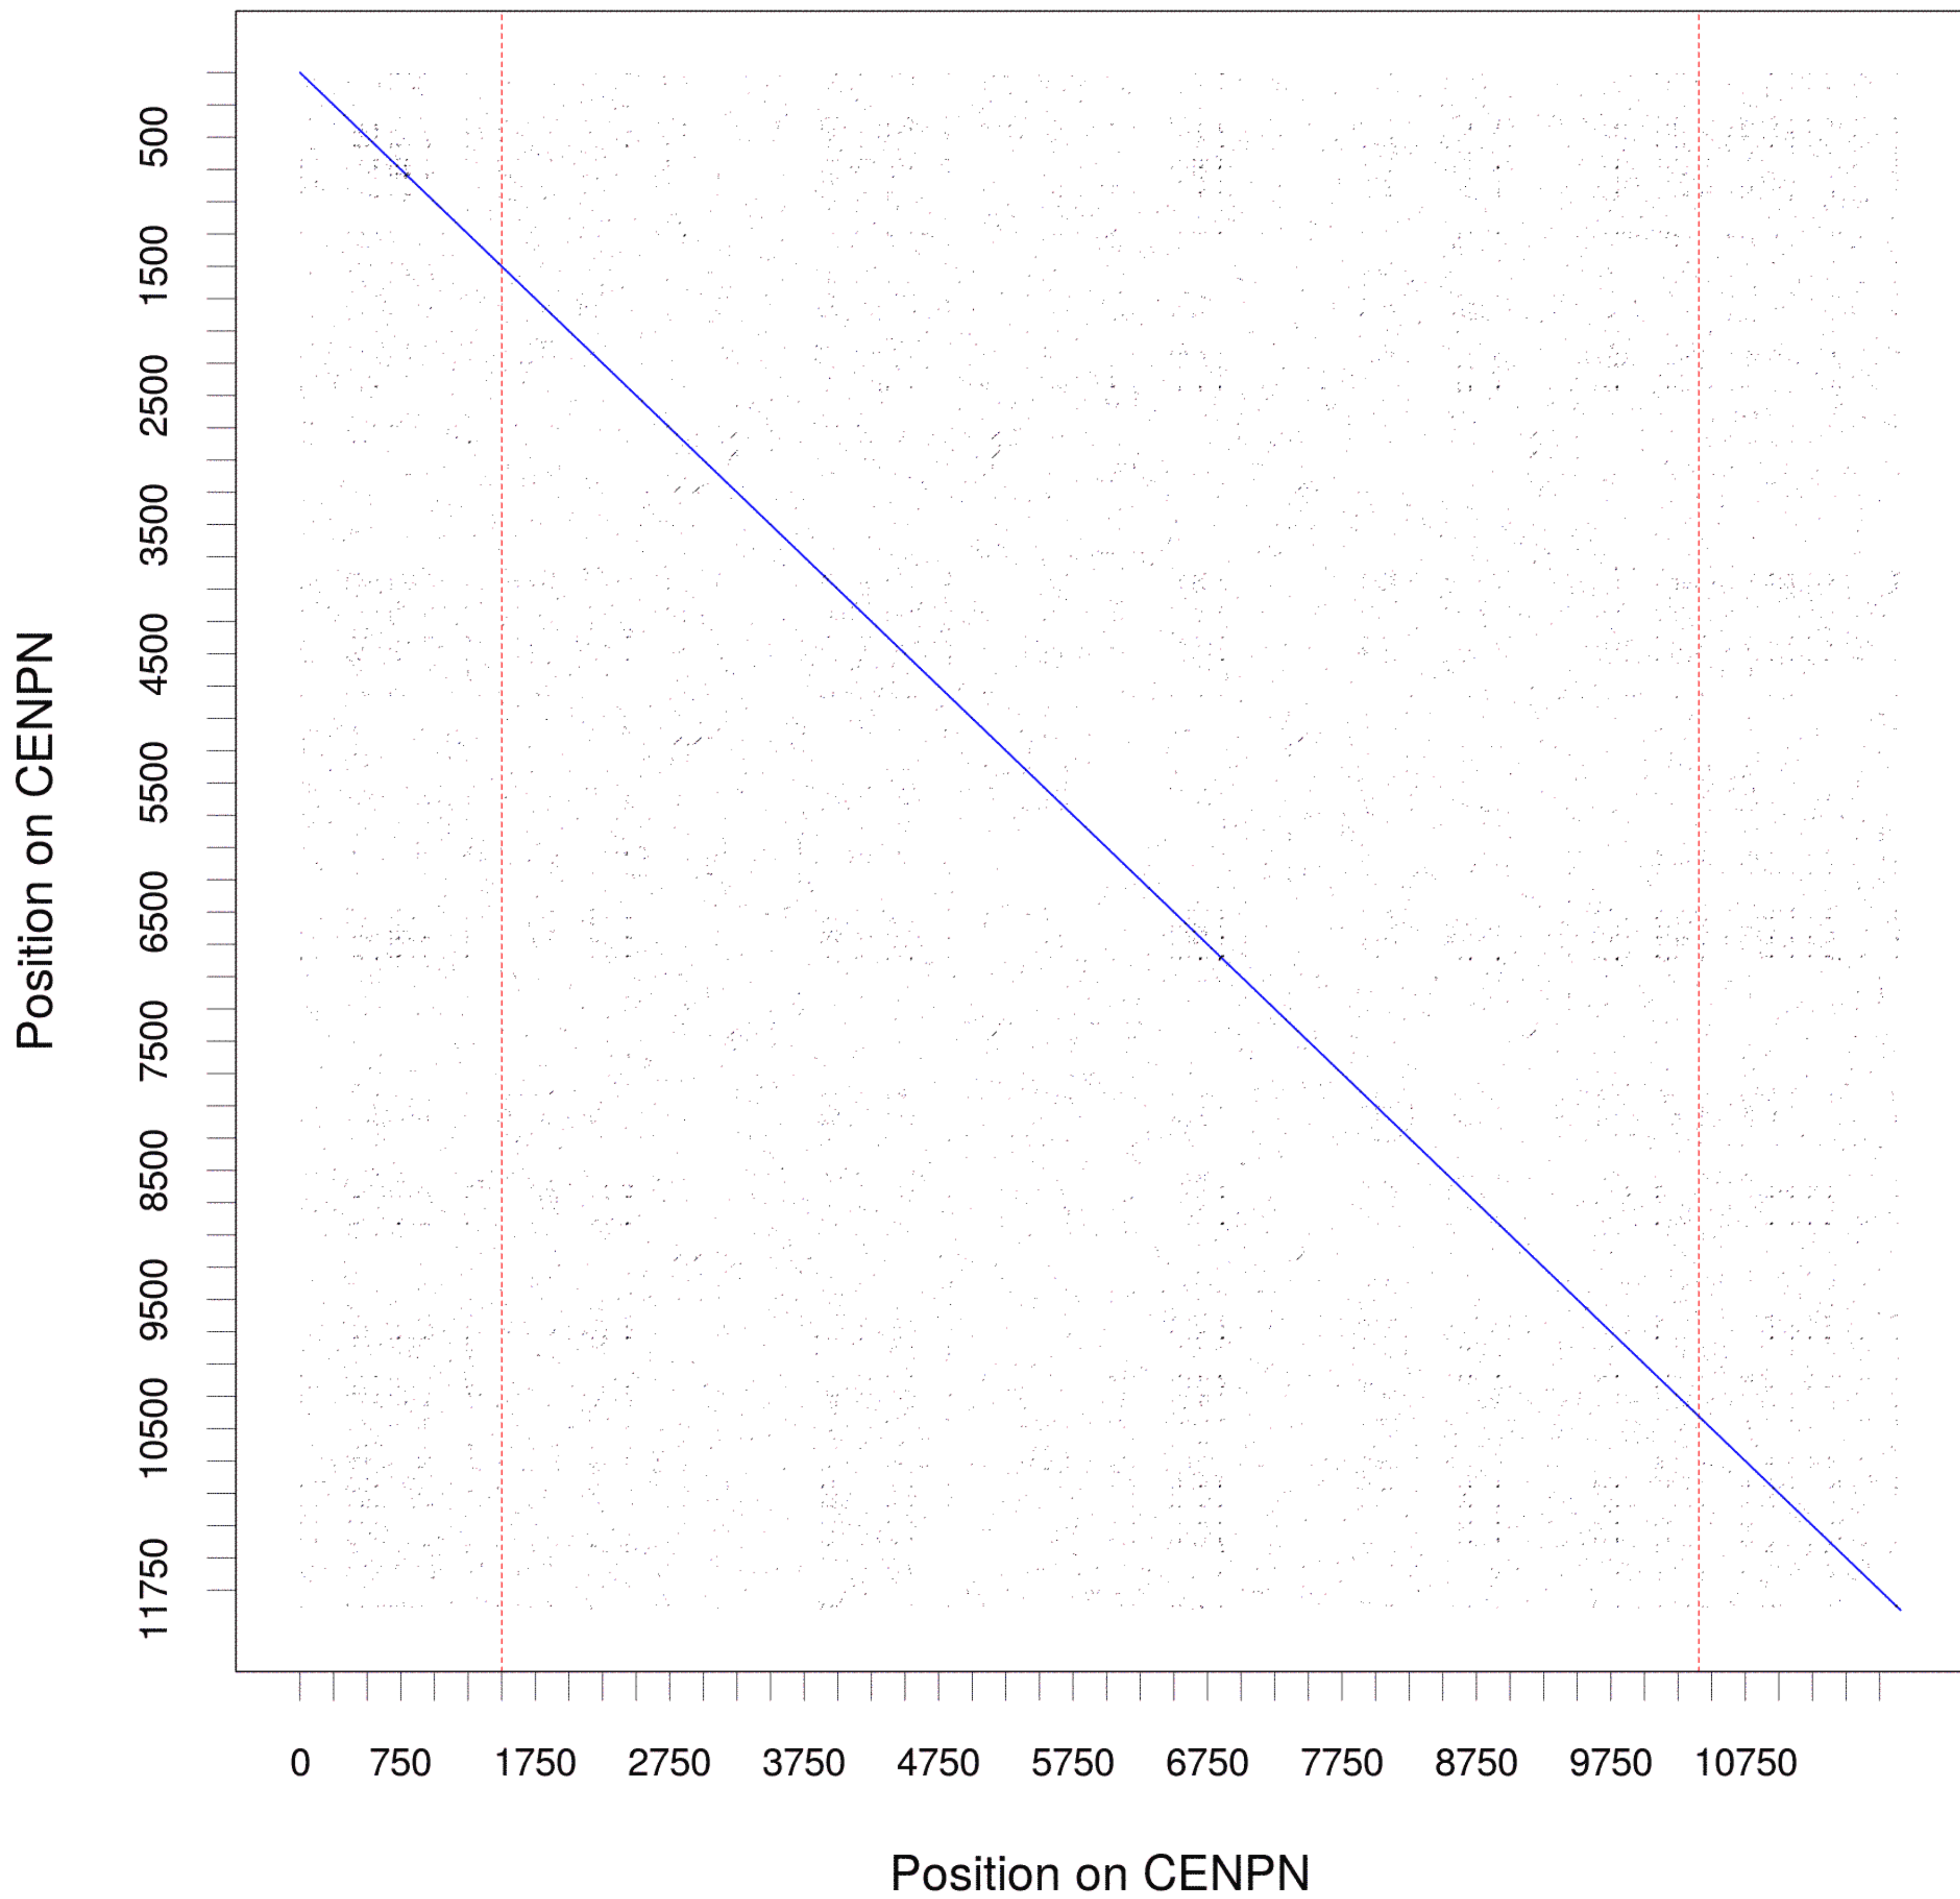



# CEP95

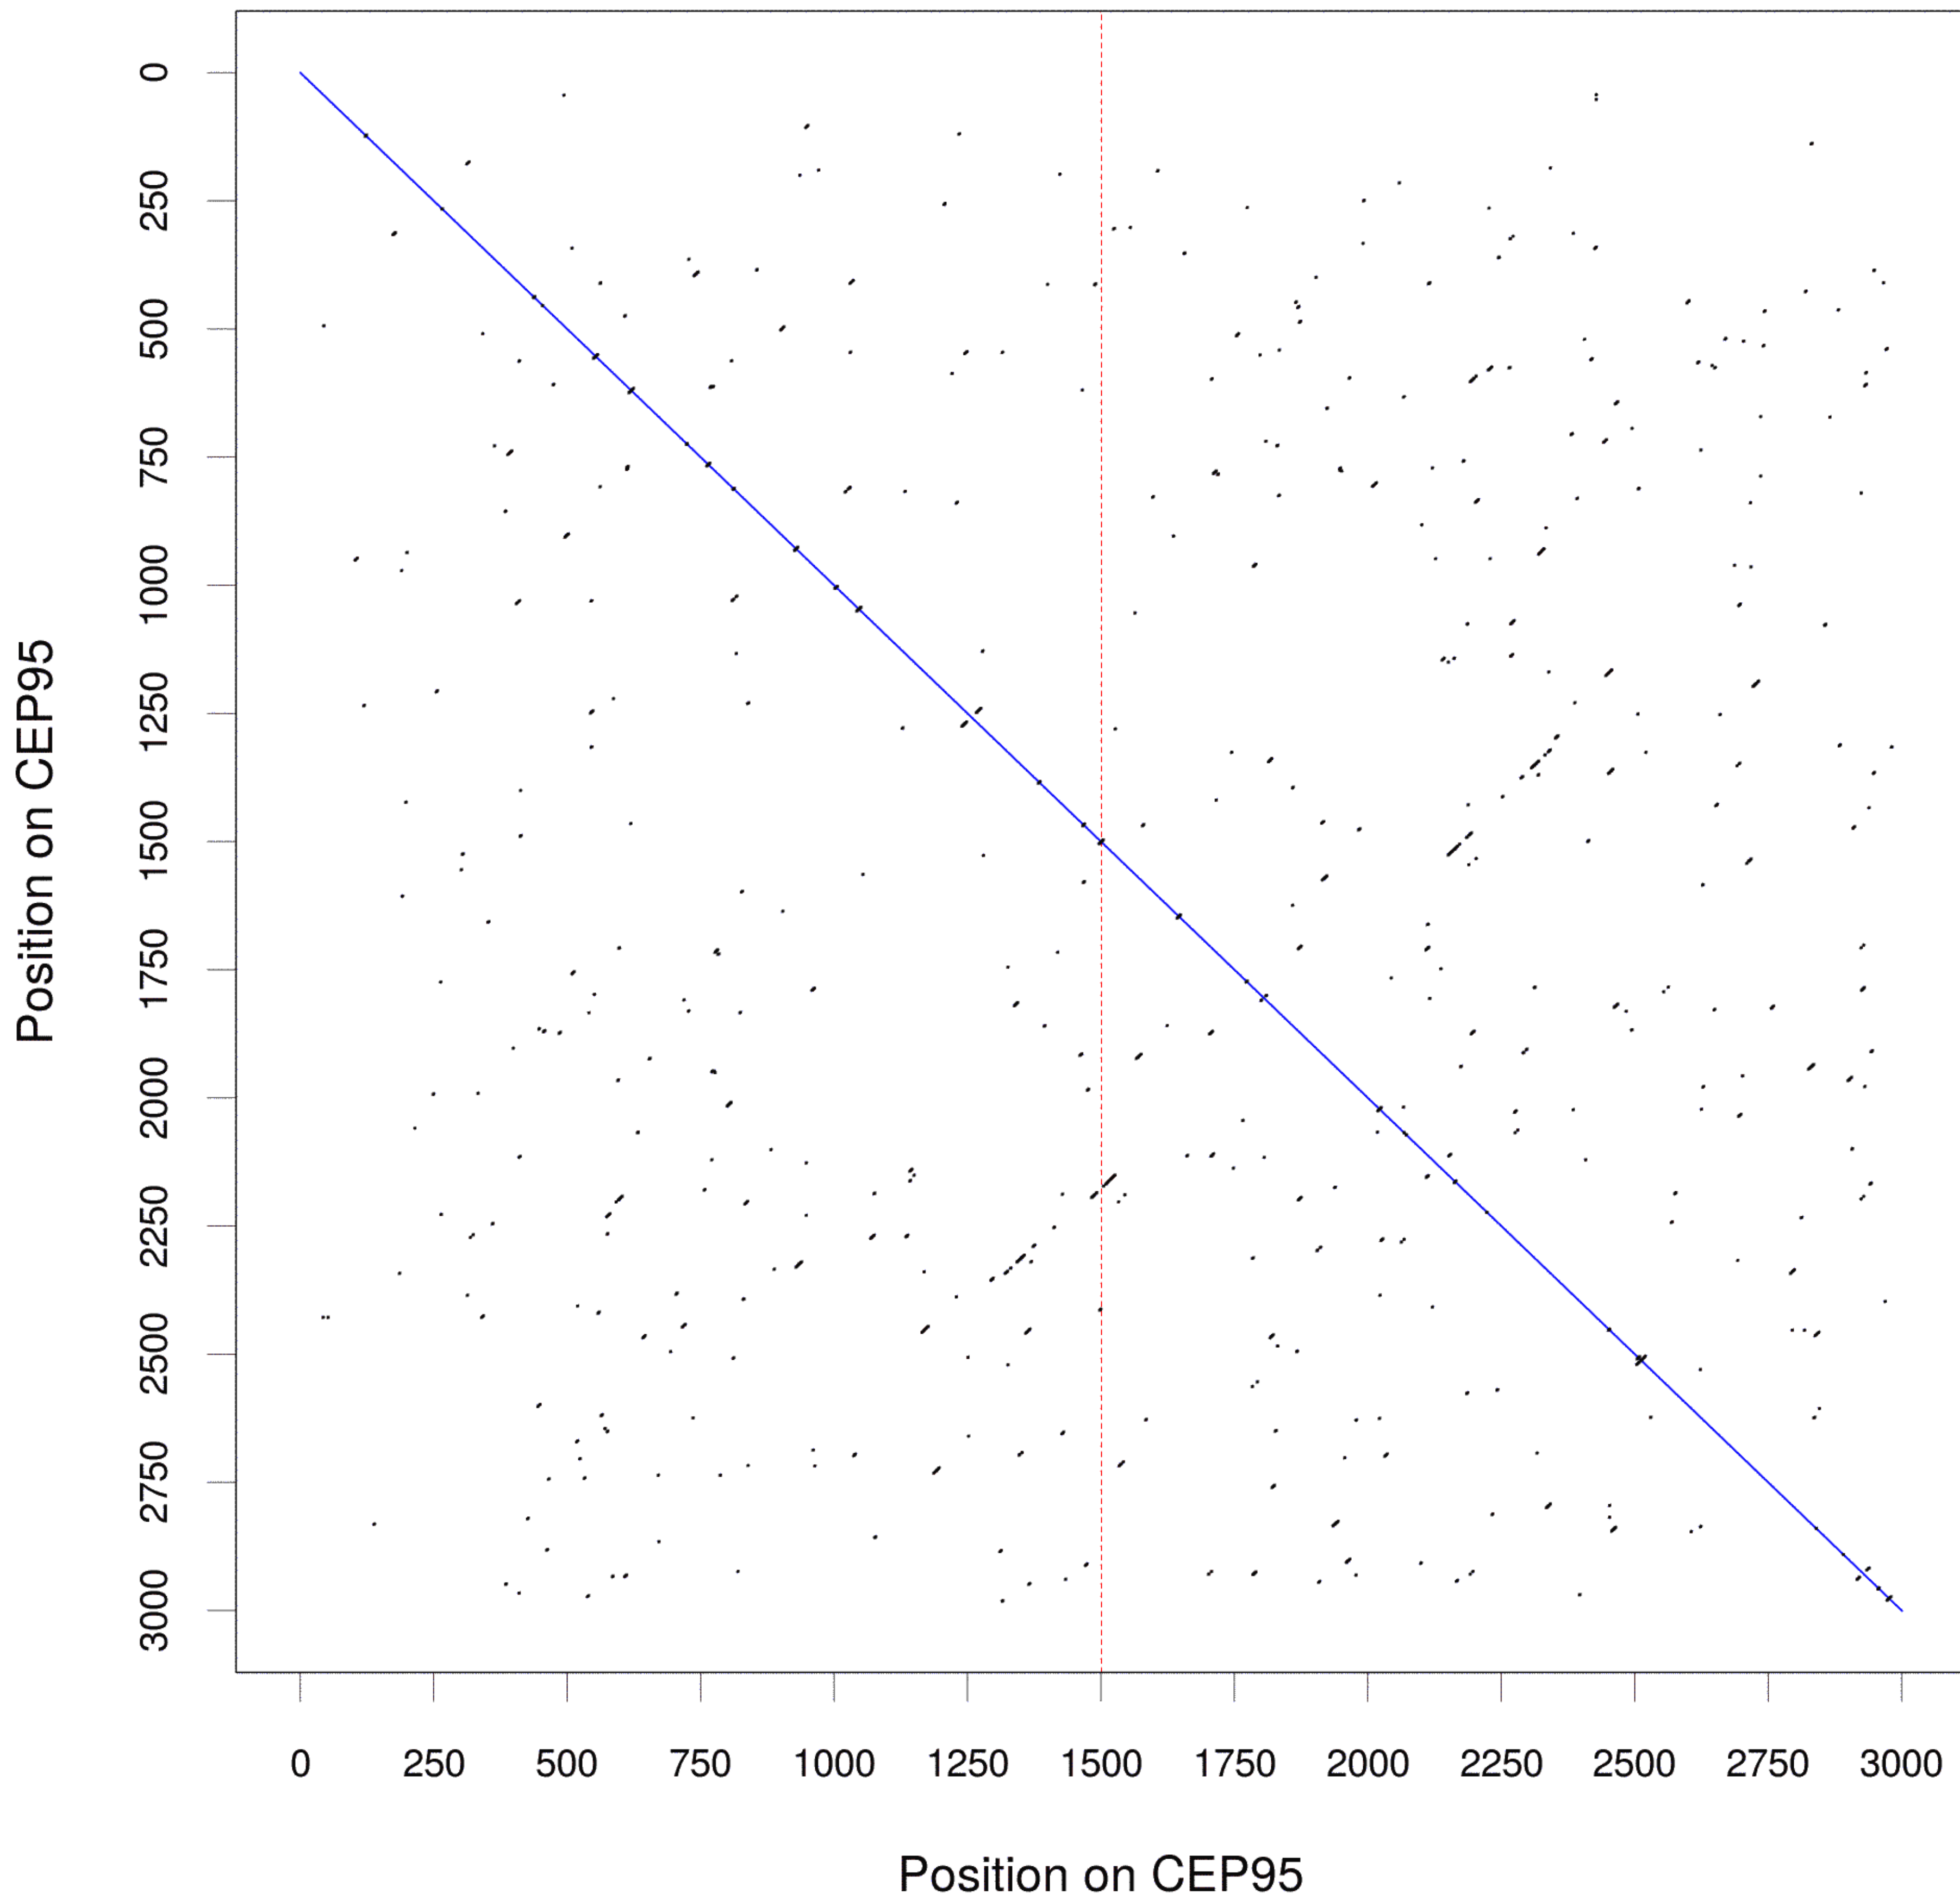

# CHD1L

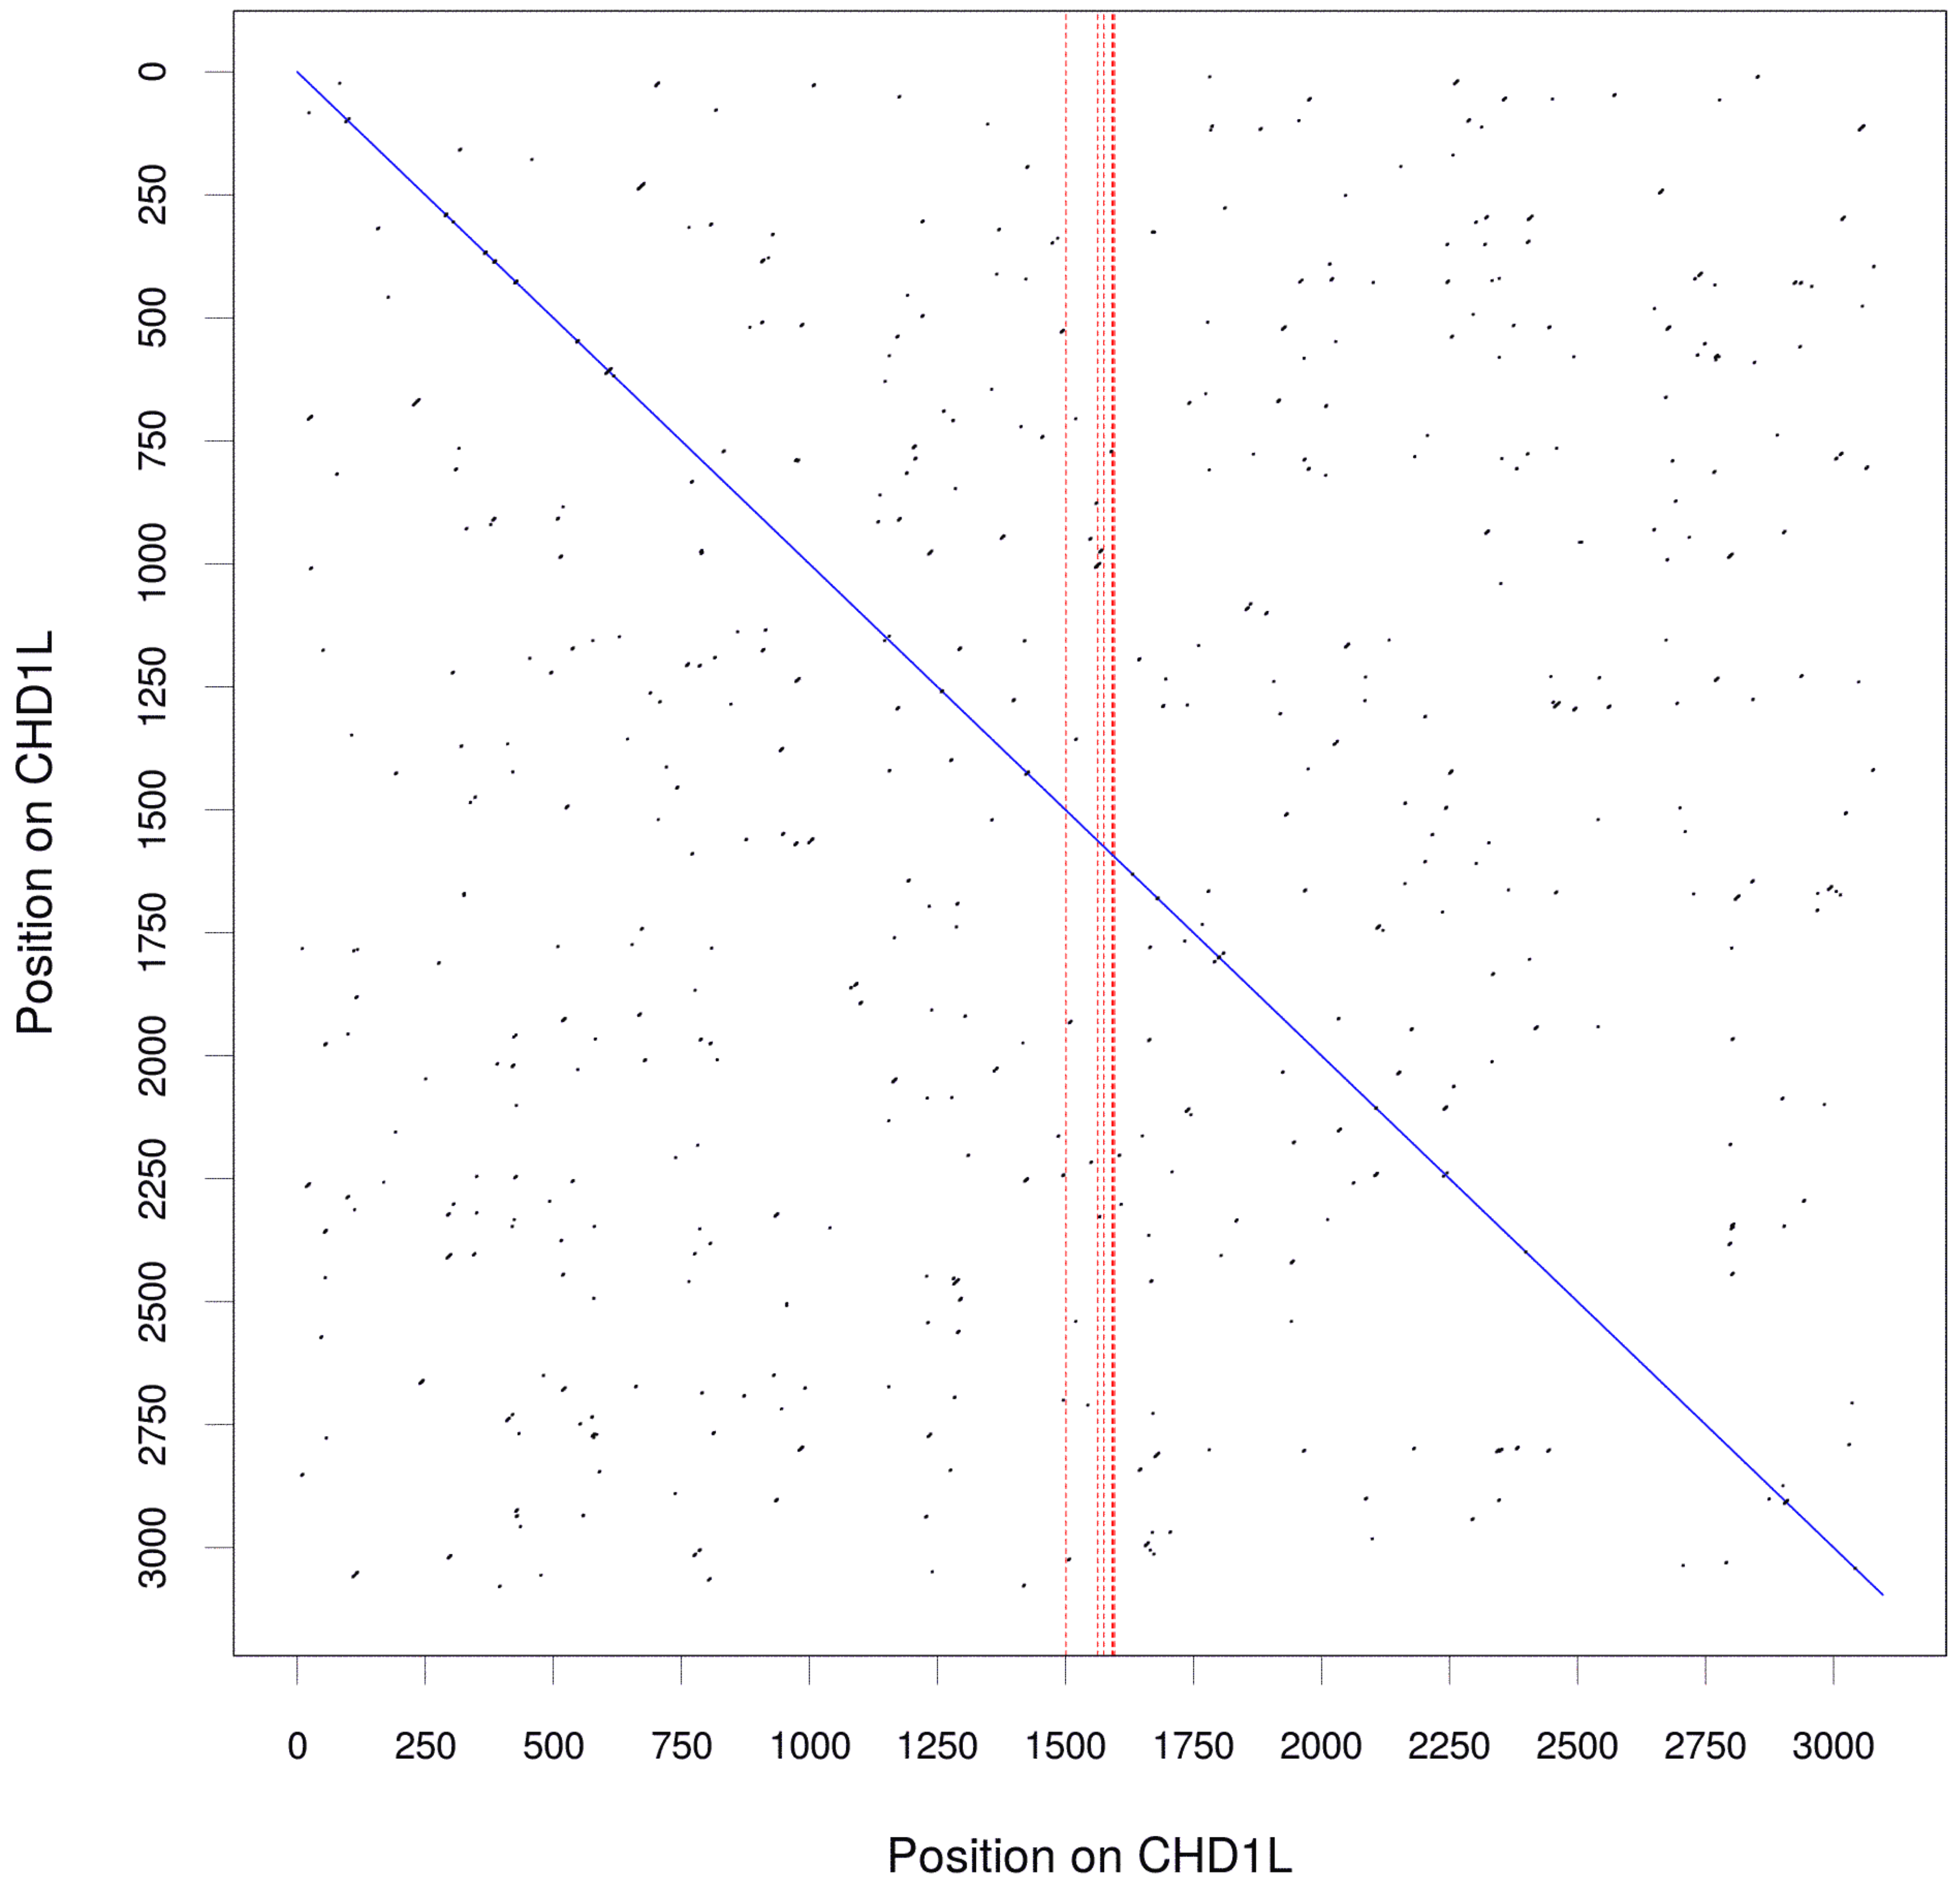

# CIDEA

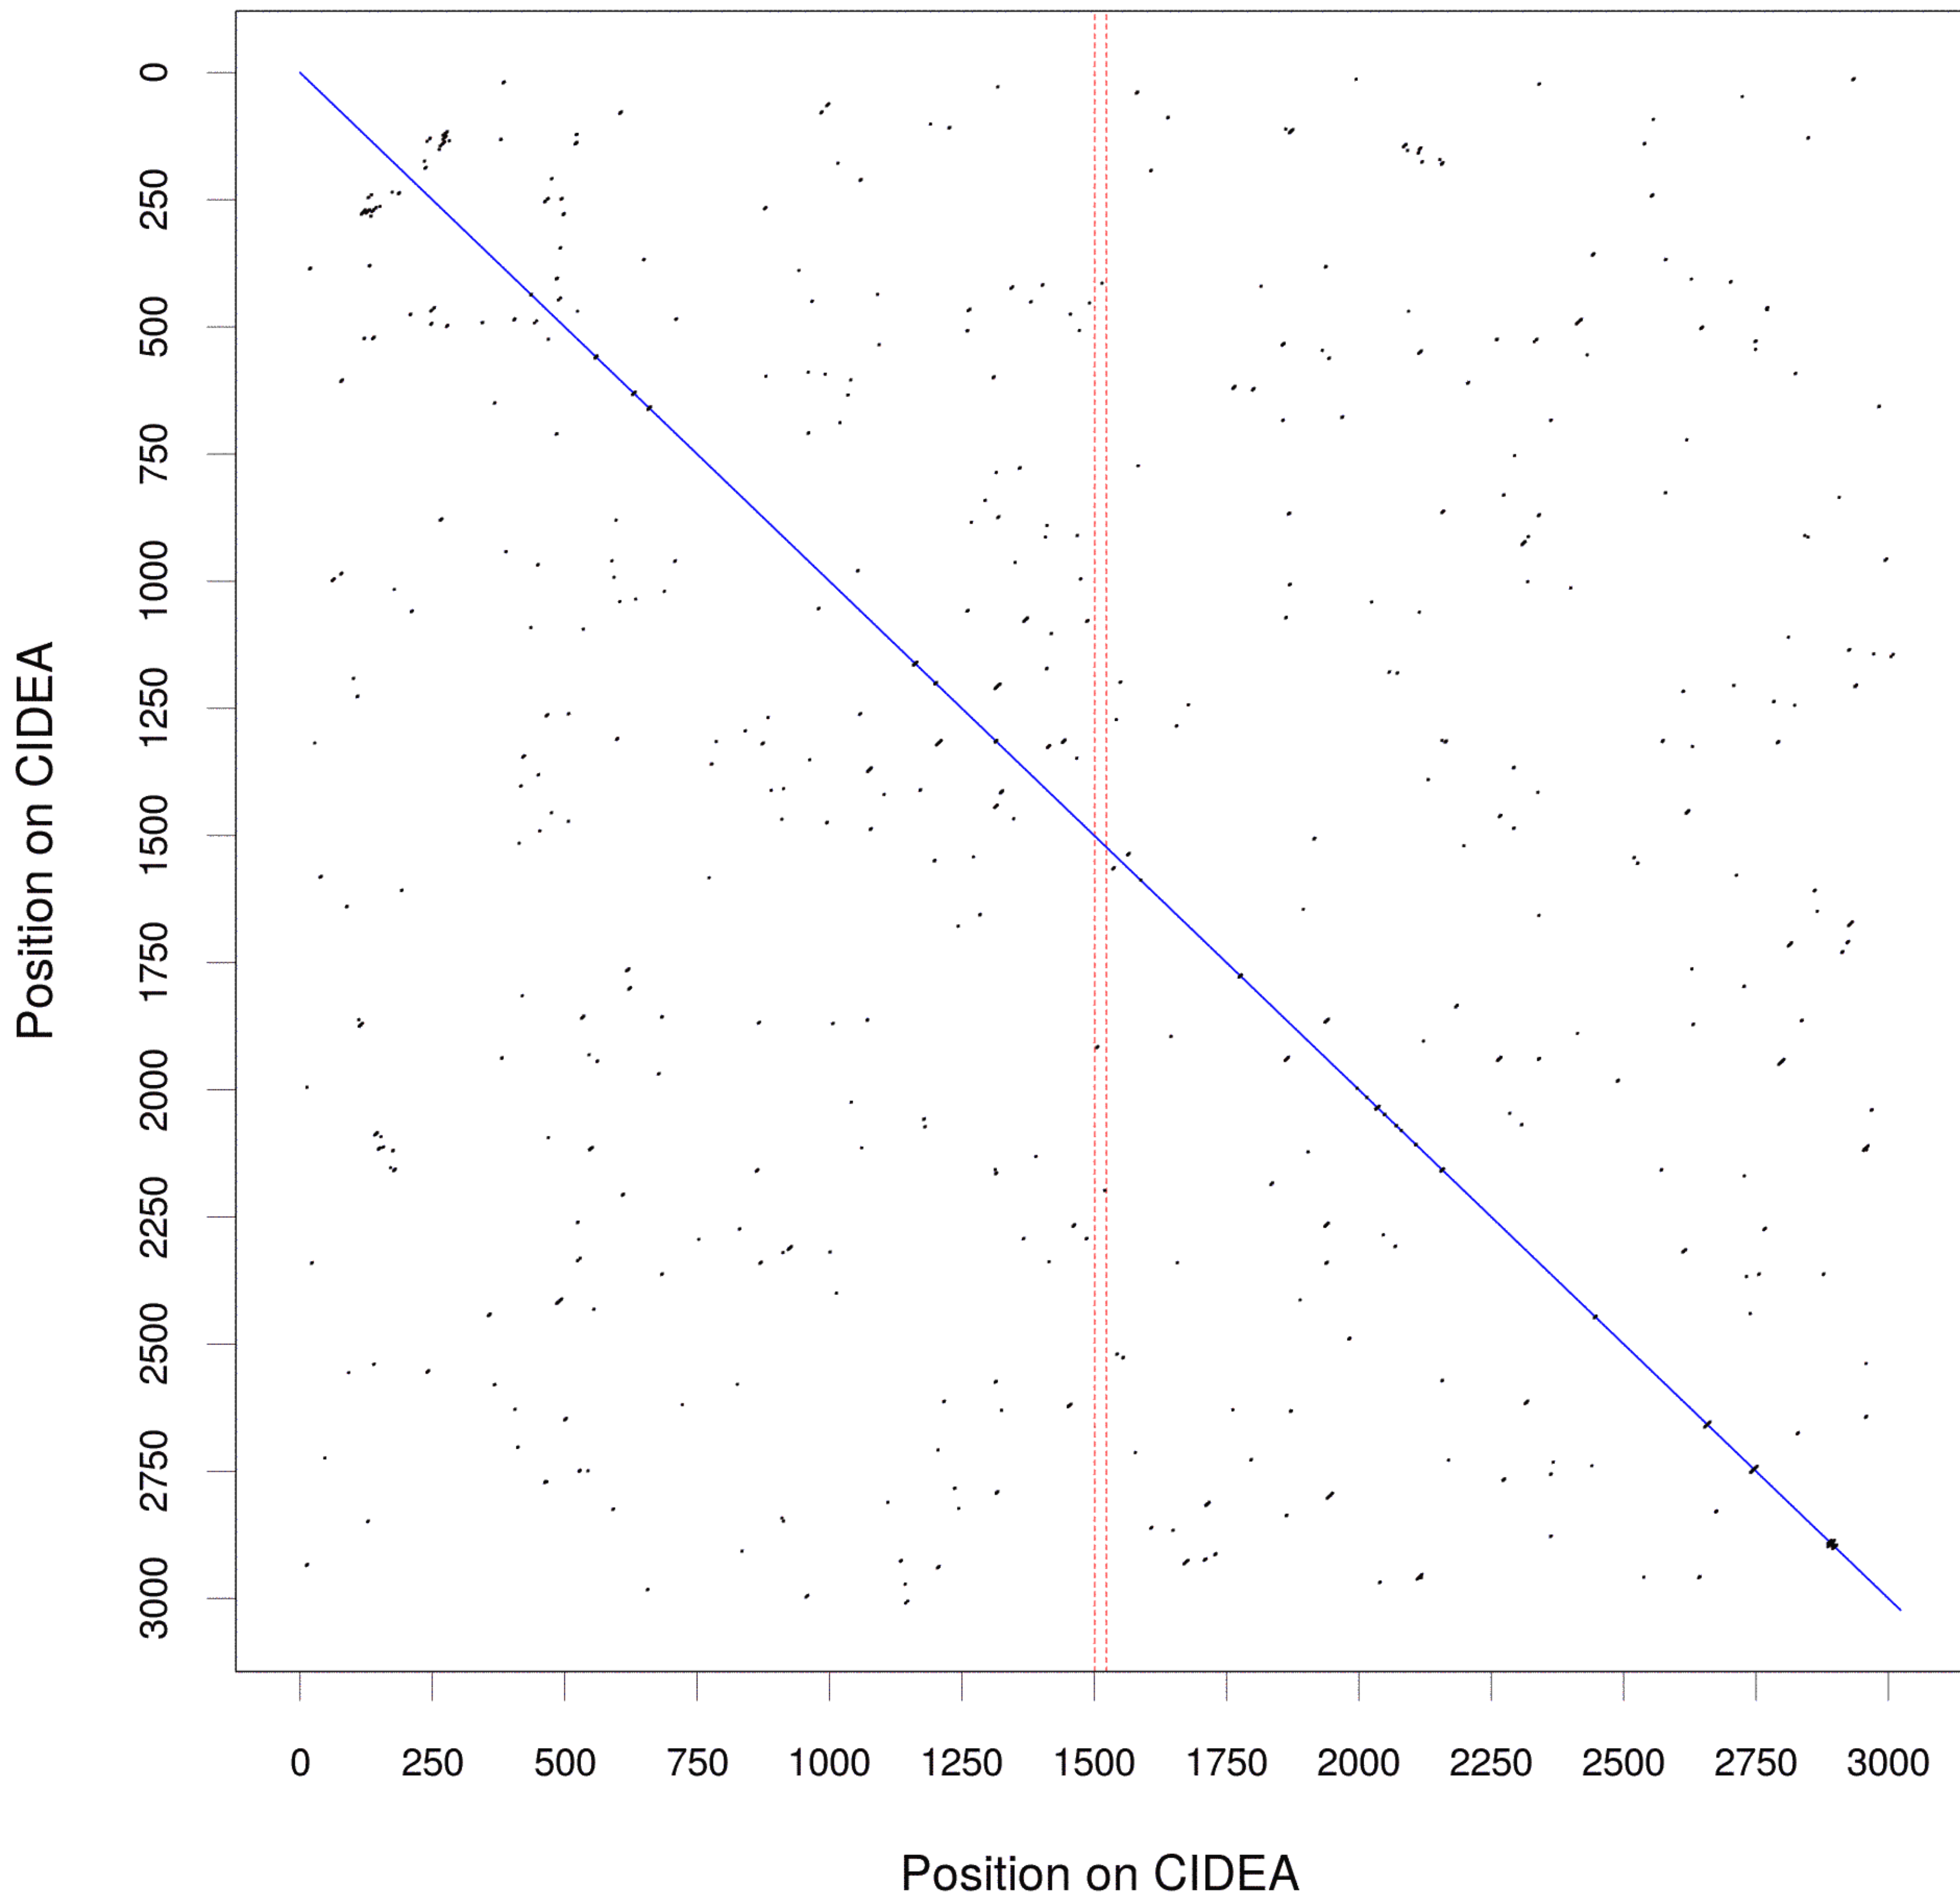

# CINP

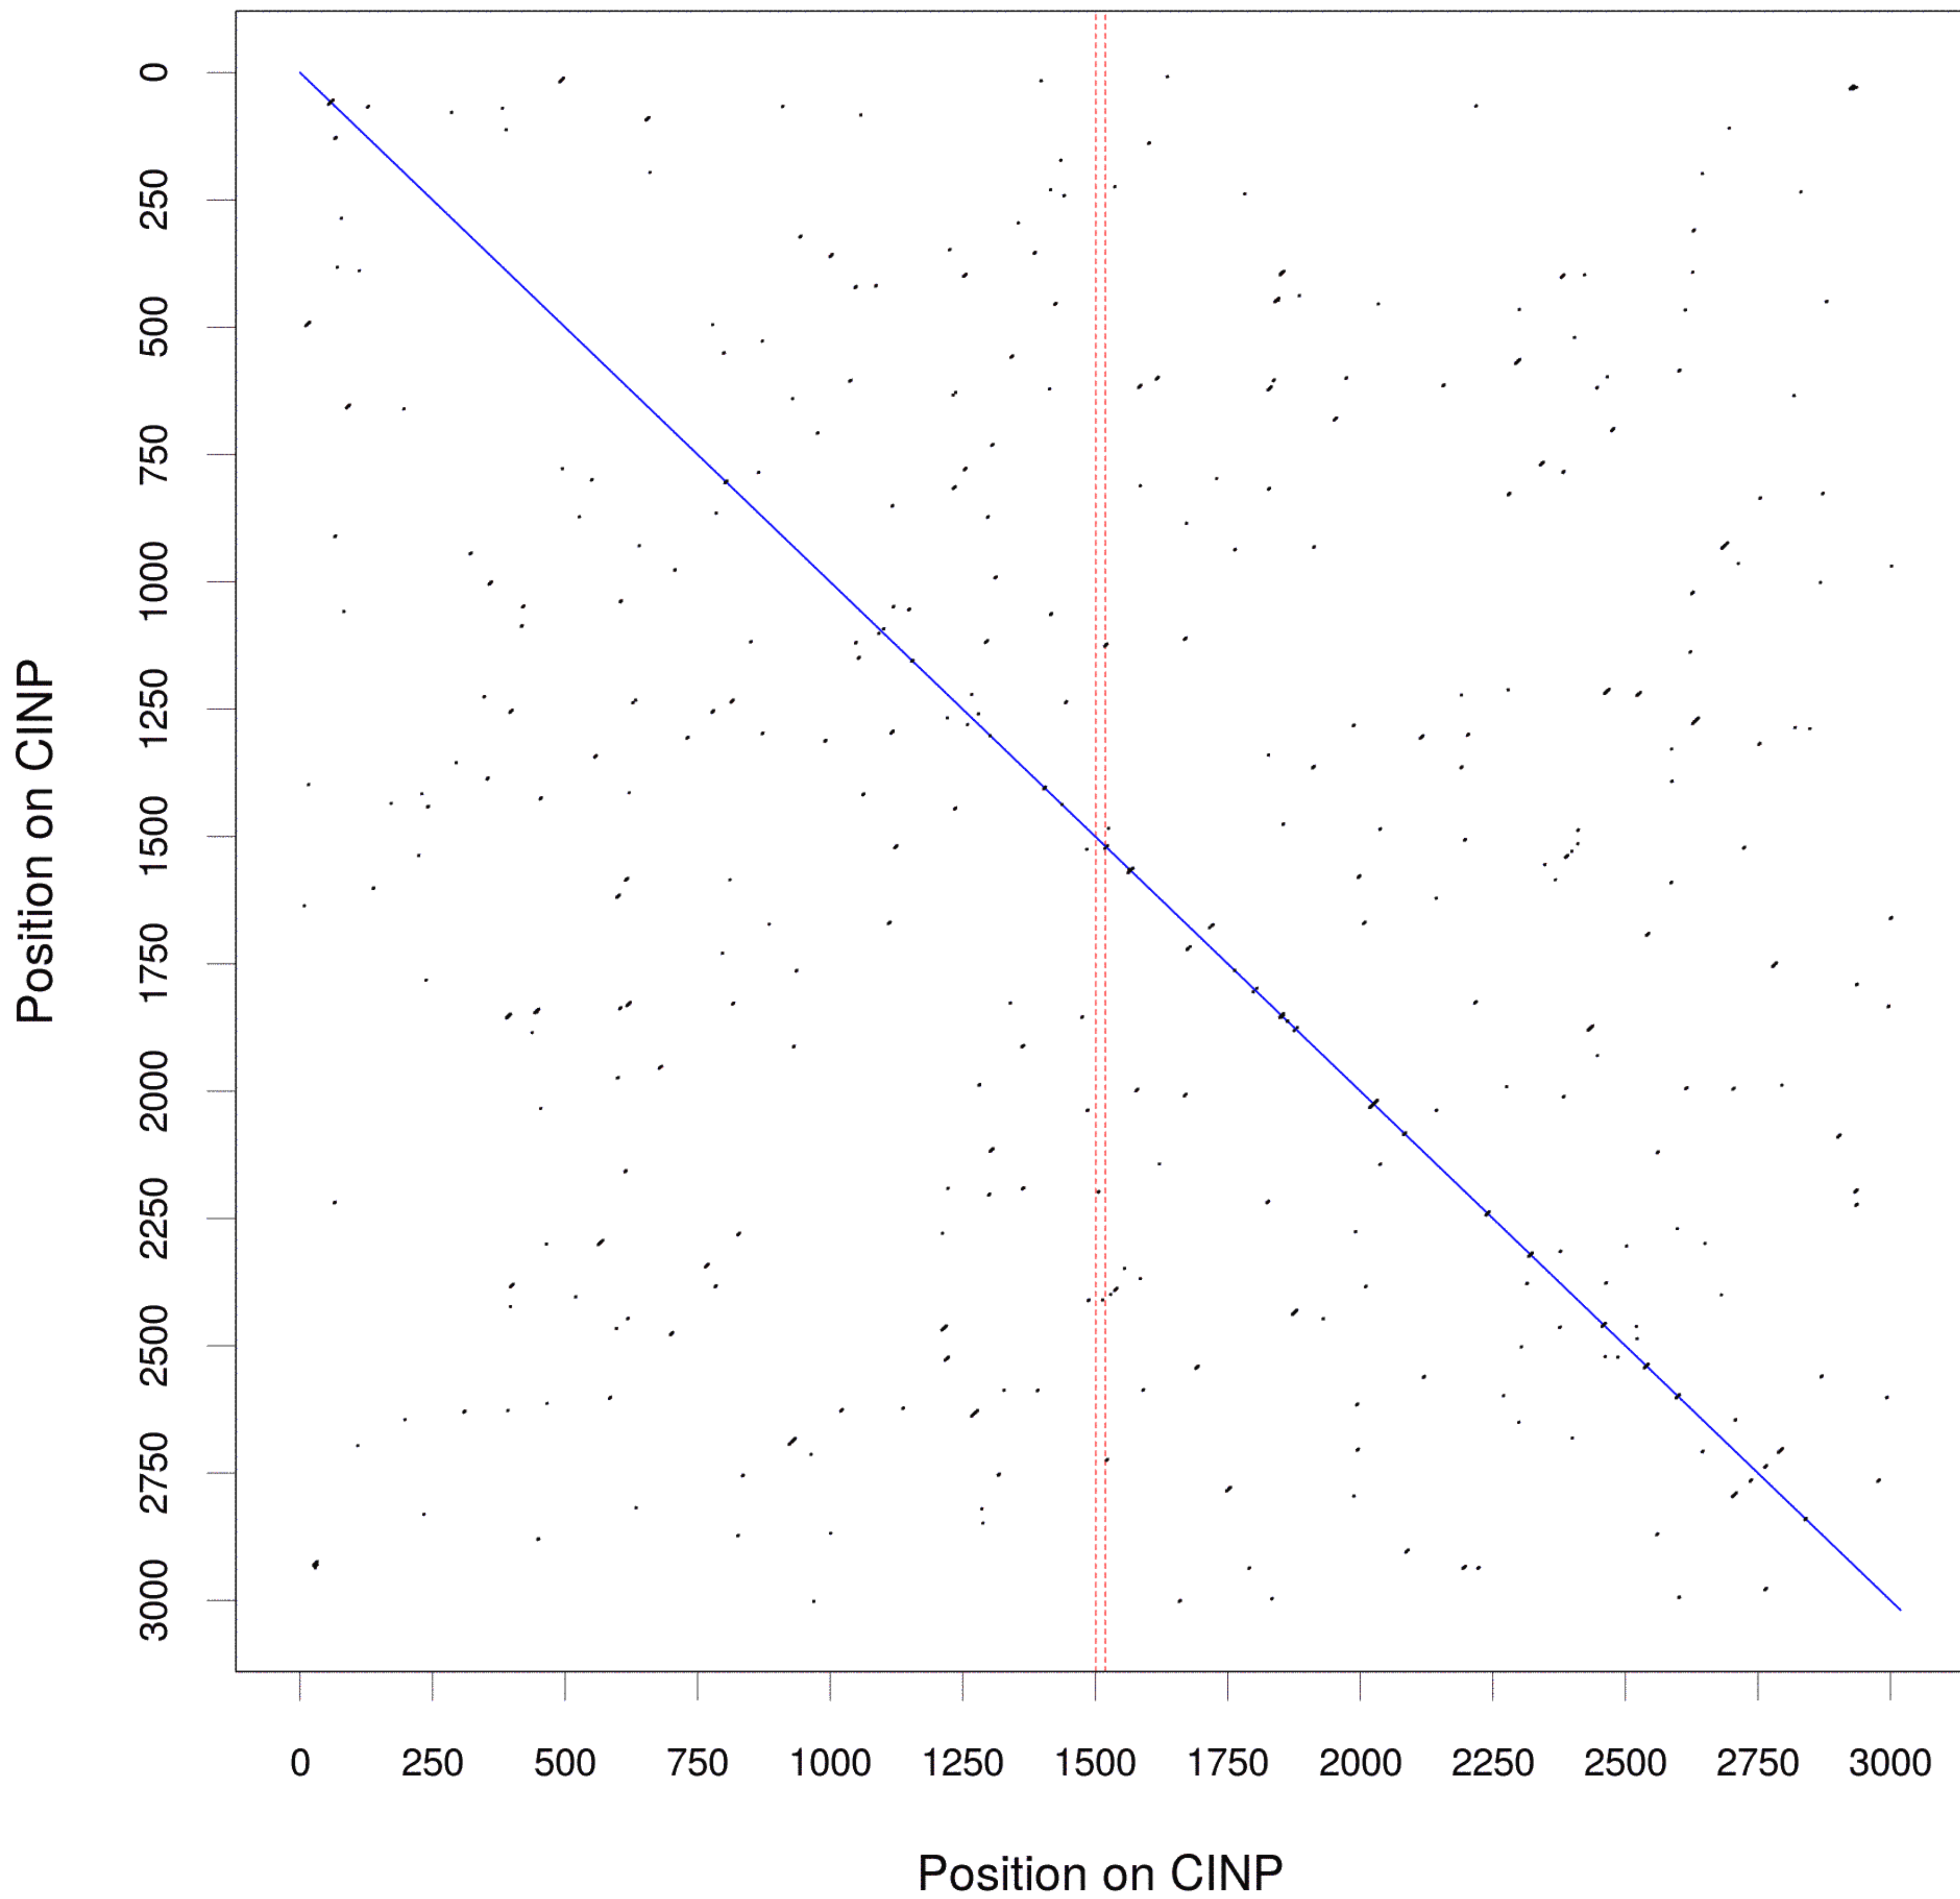

# CLN3

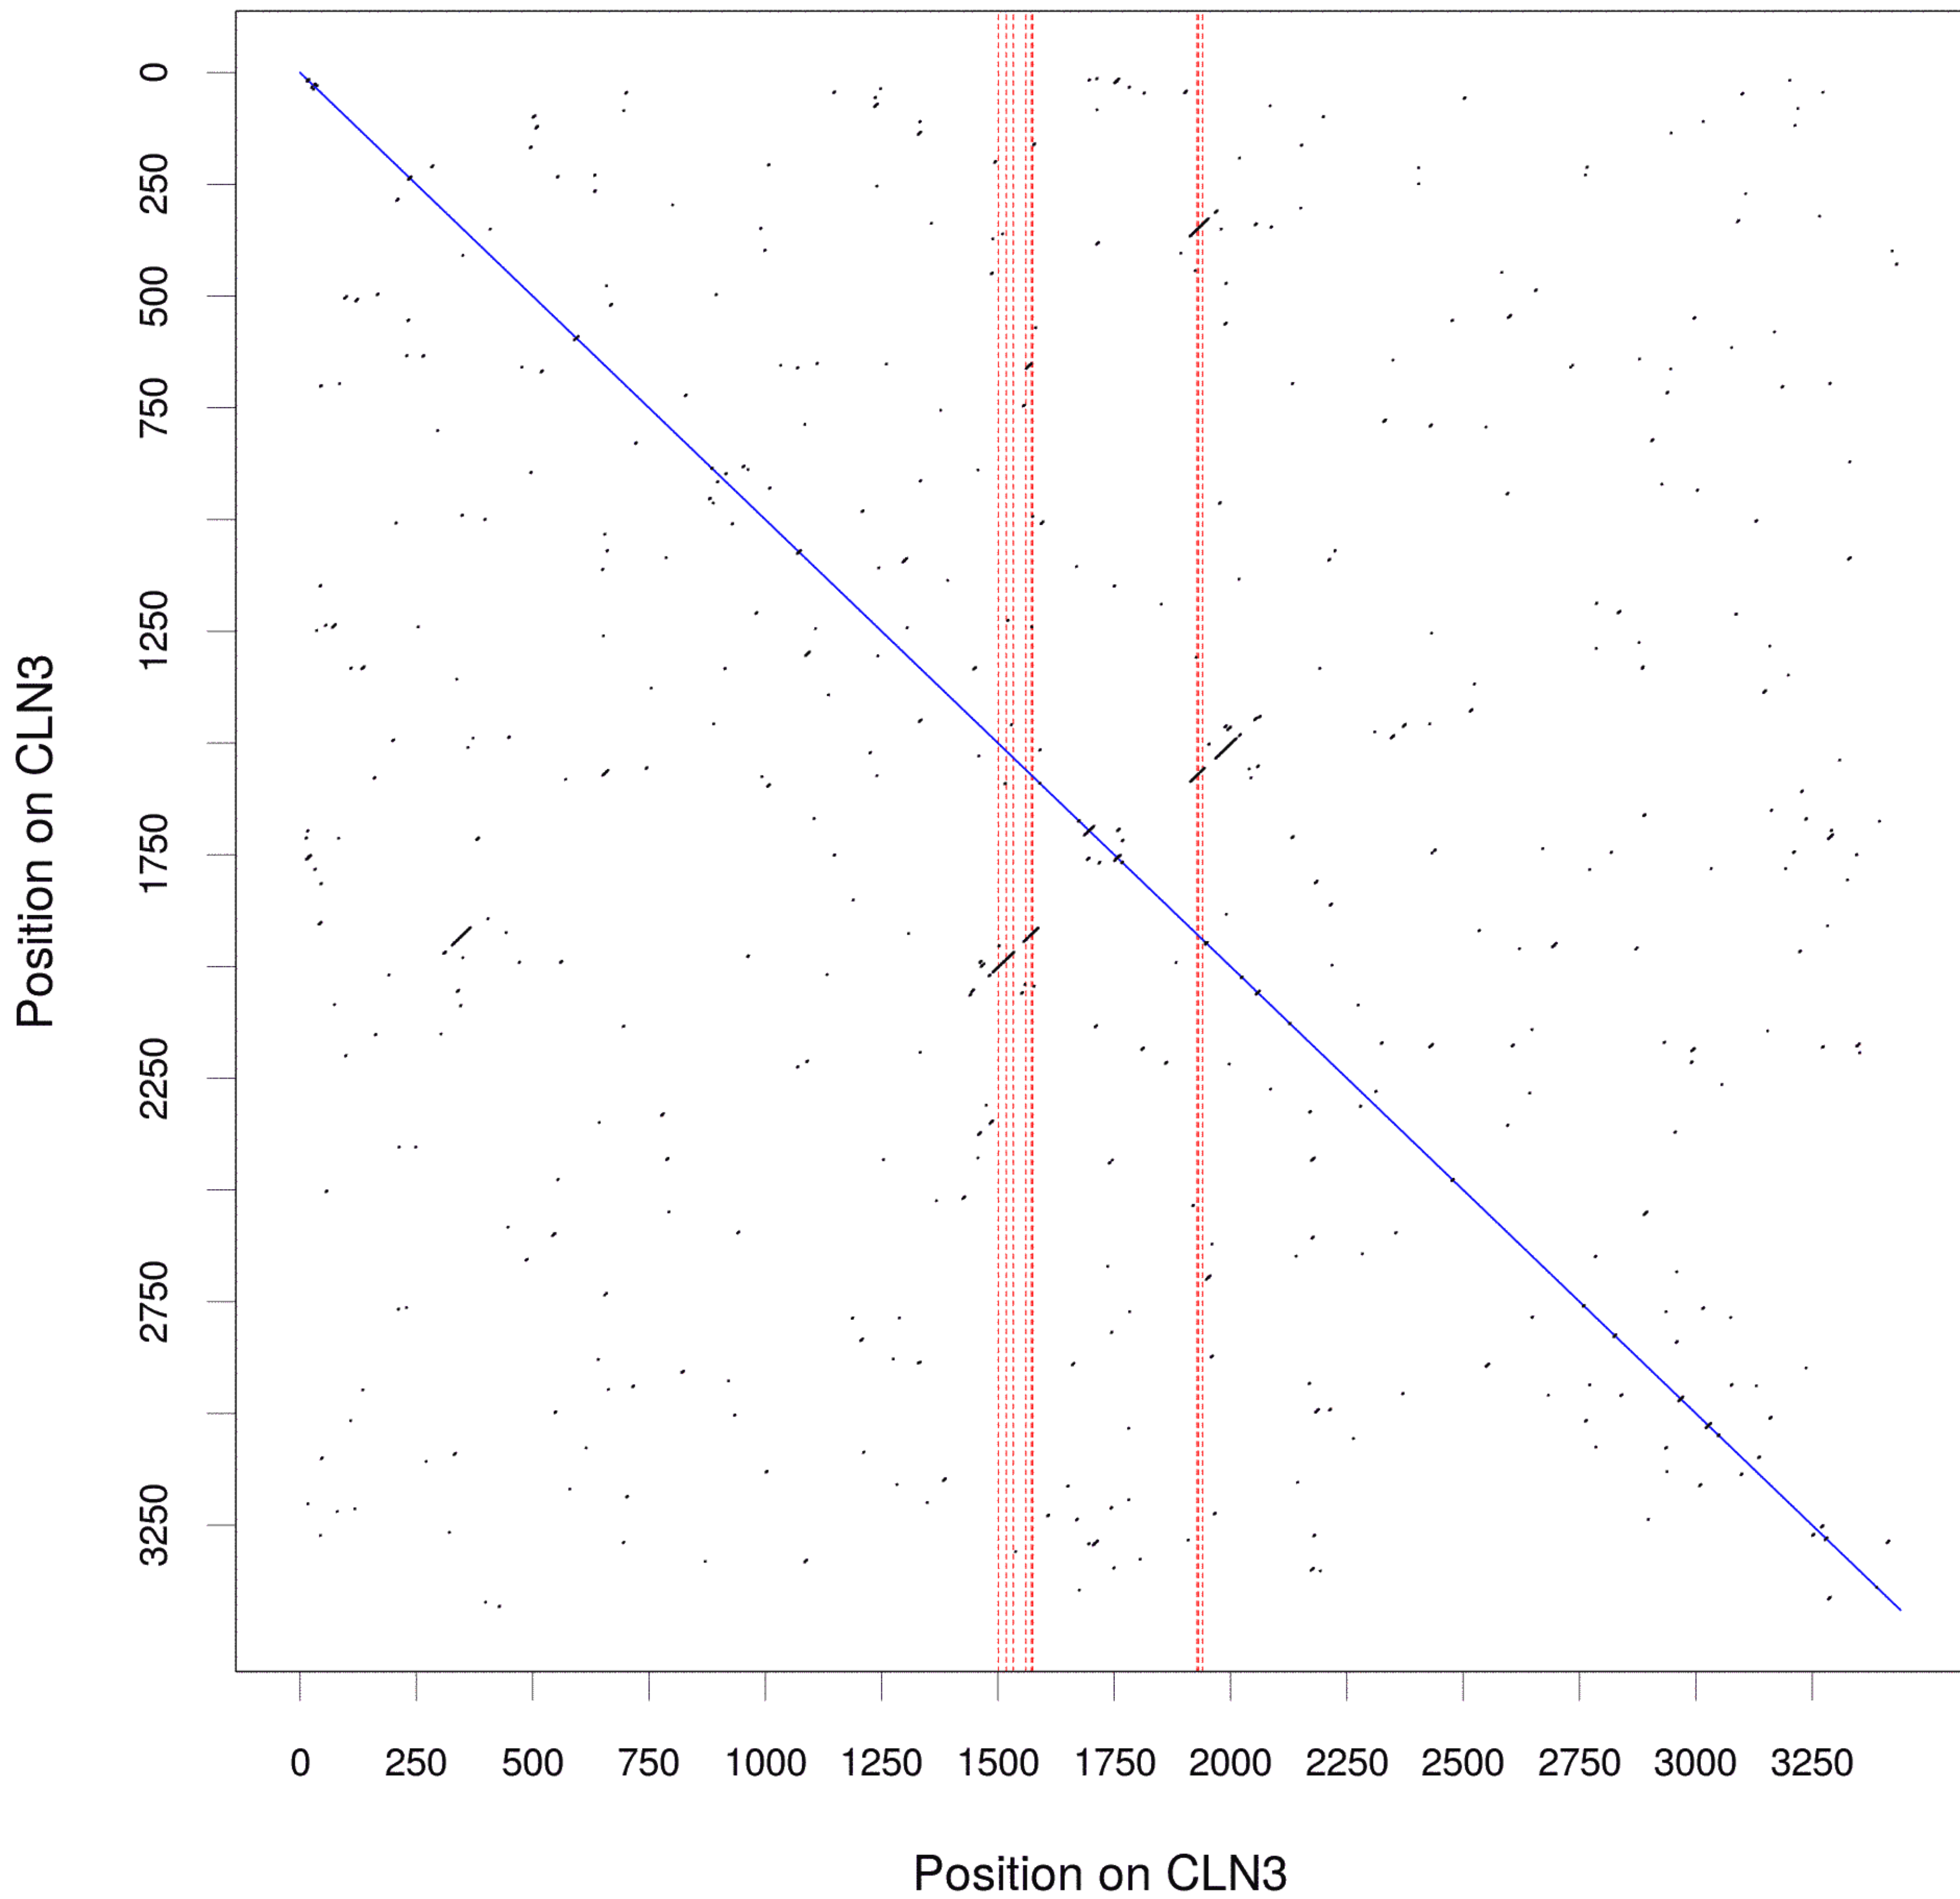

# CMTM7

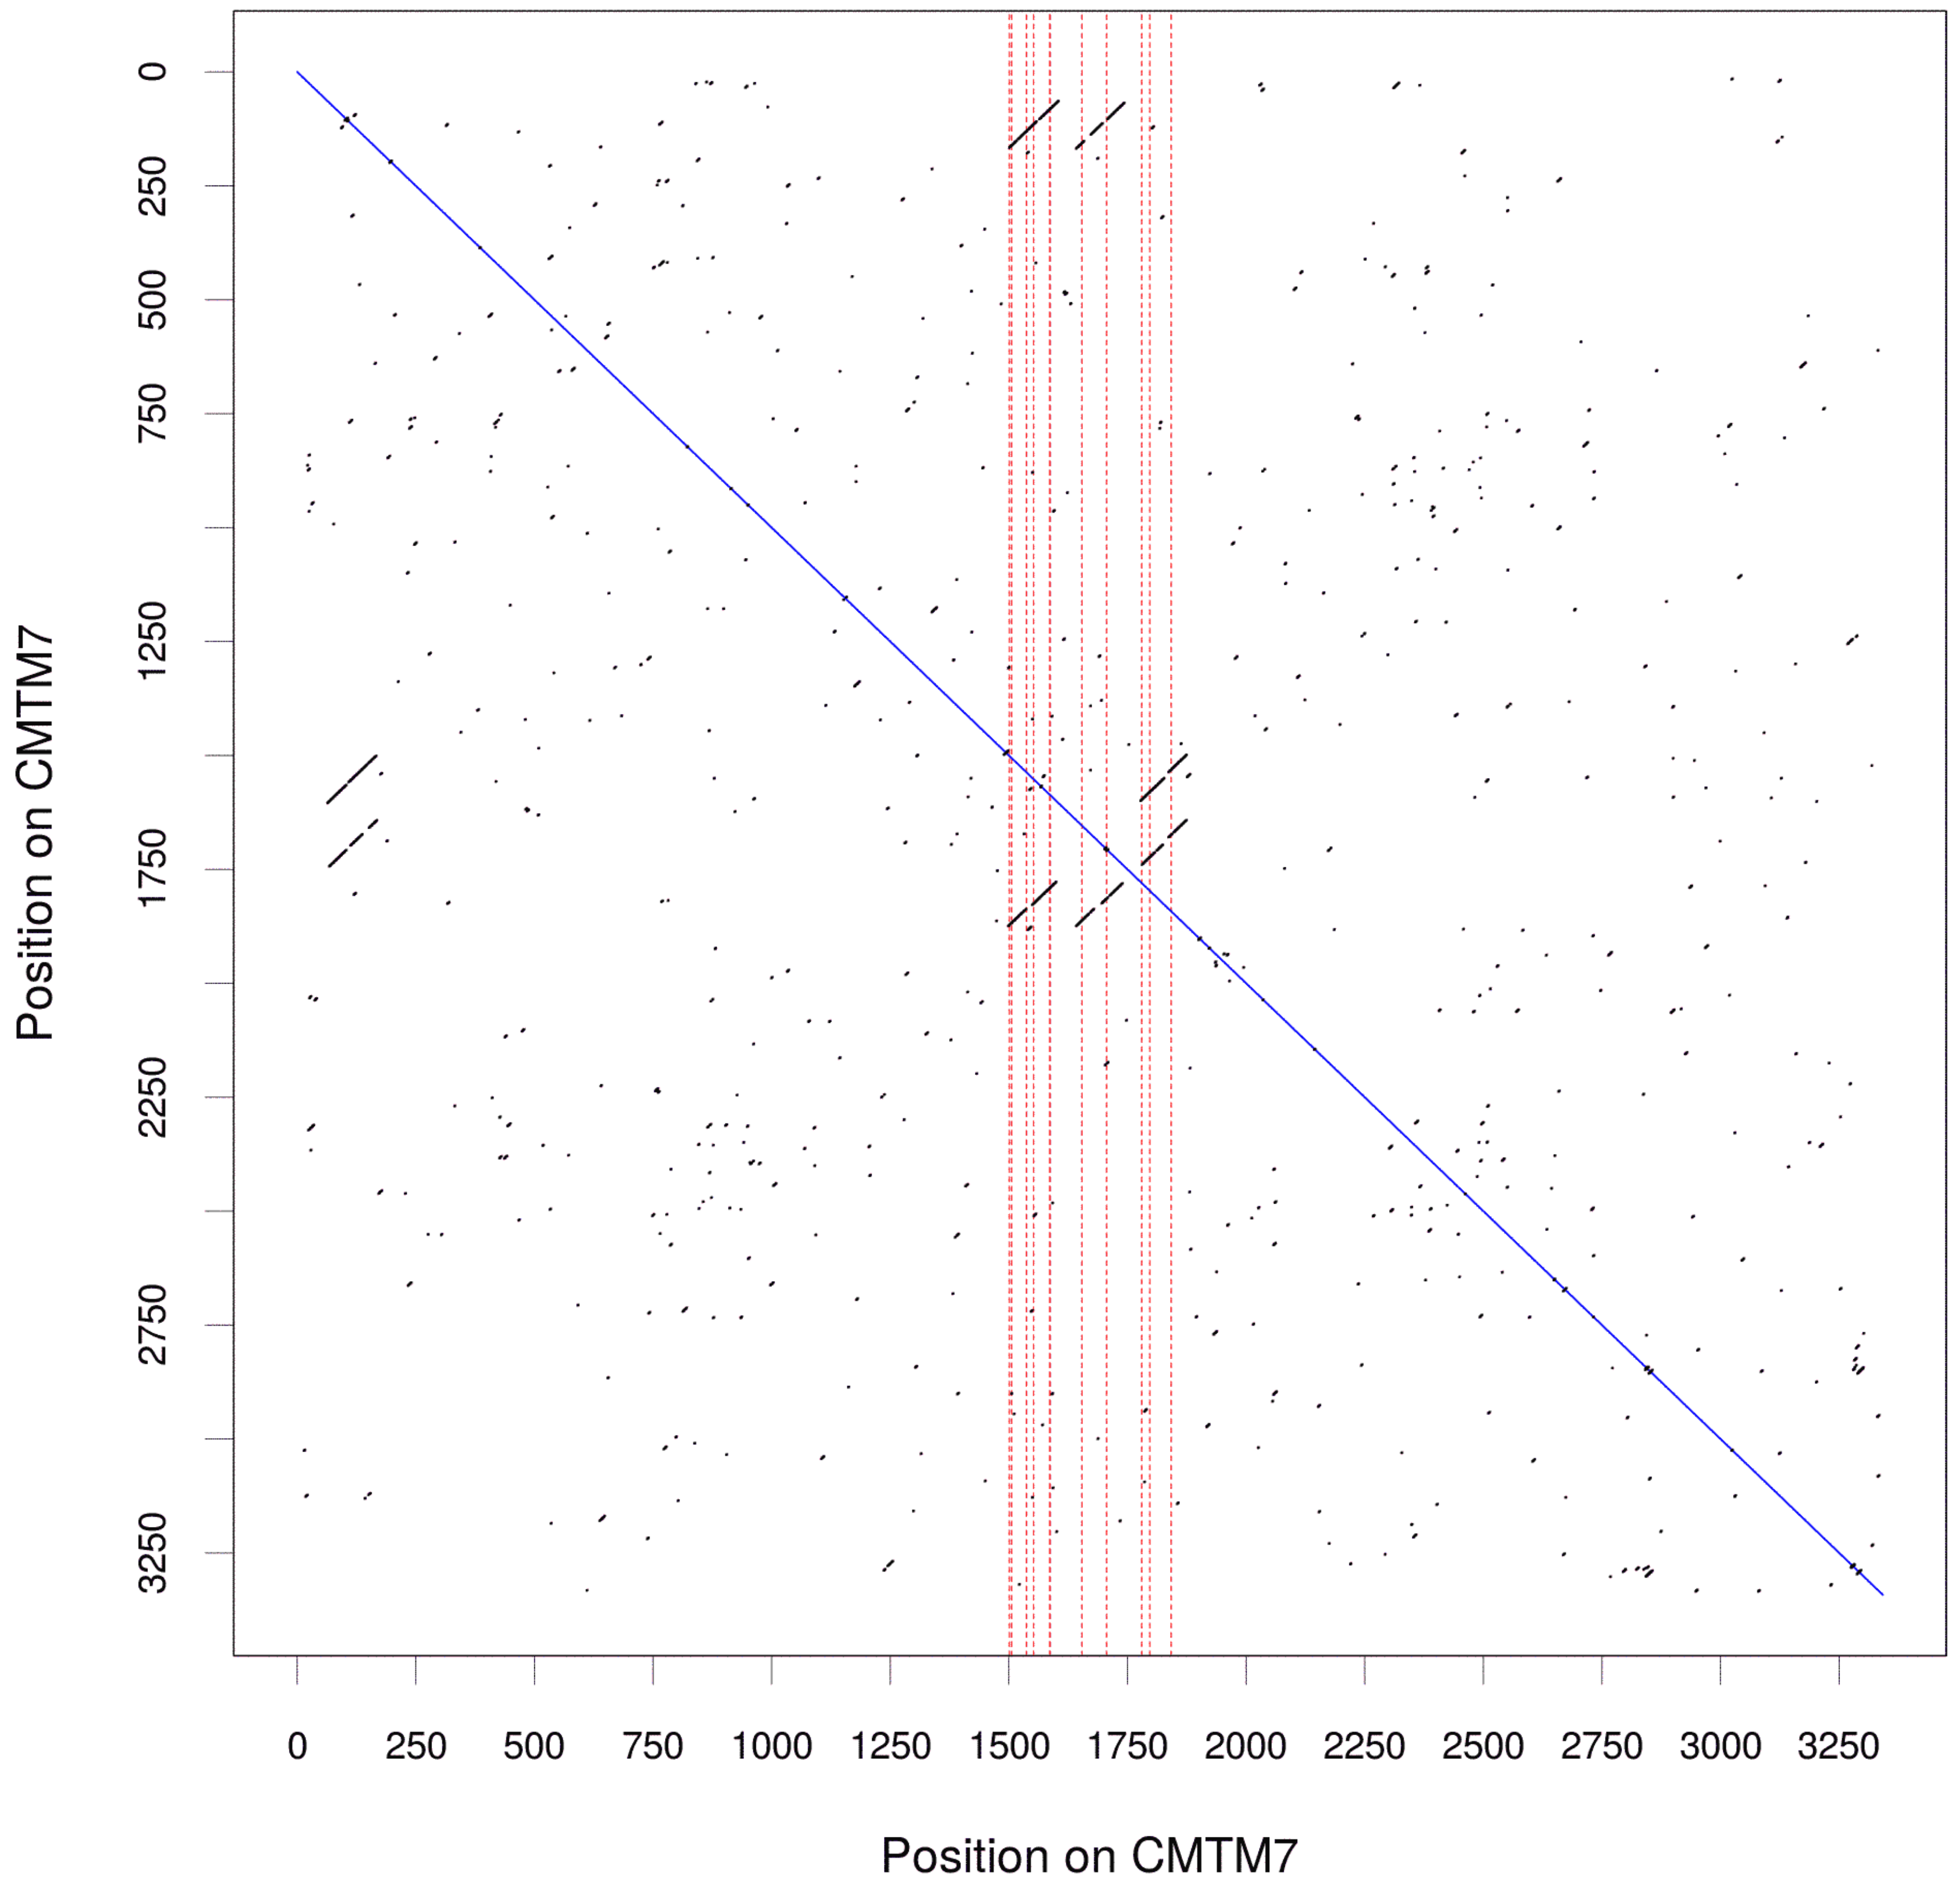

# CMTM8

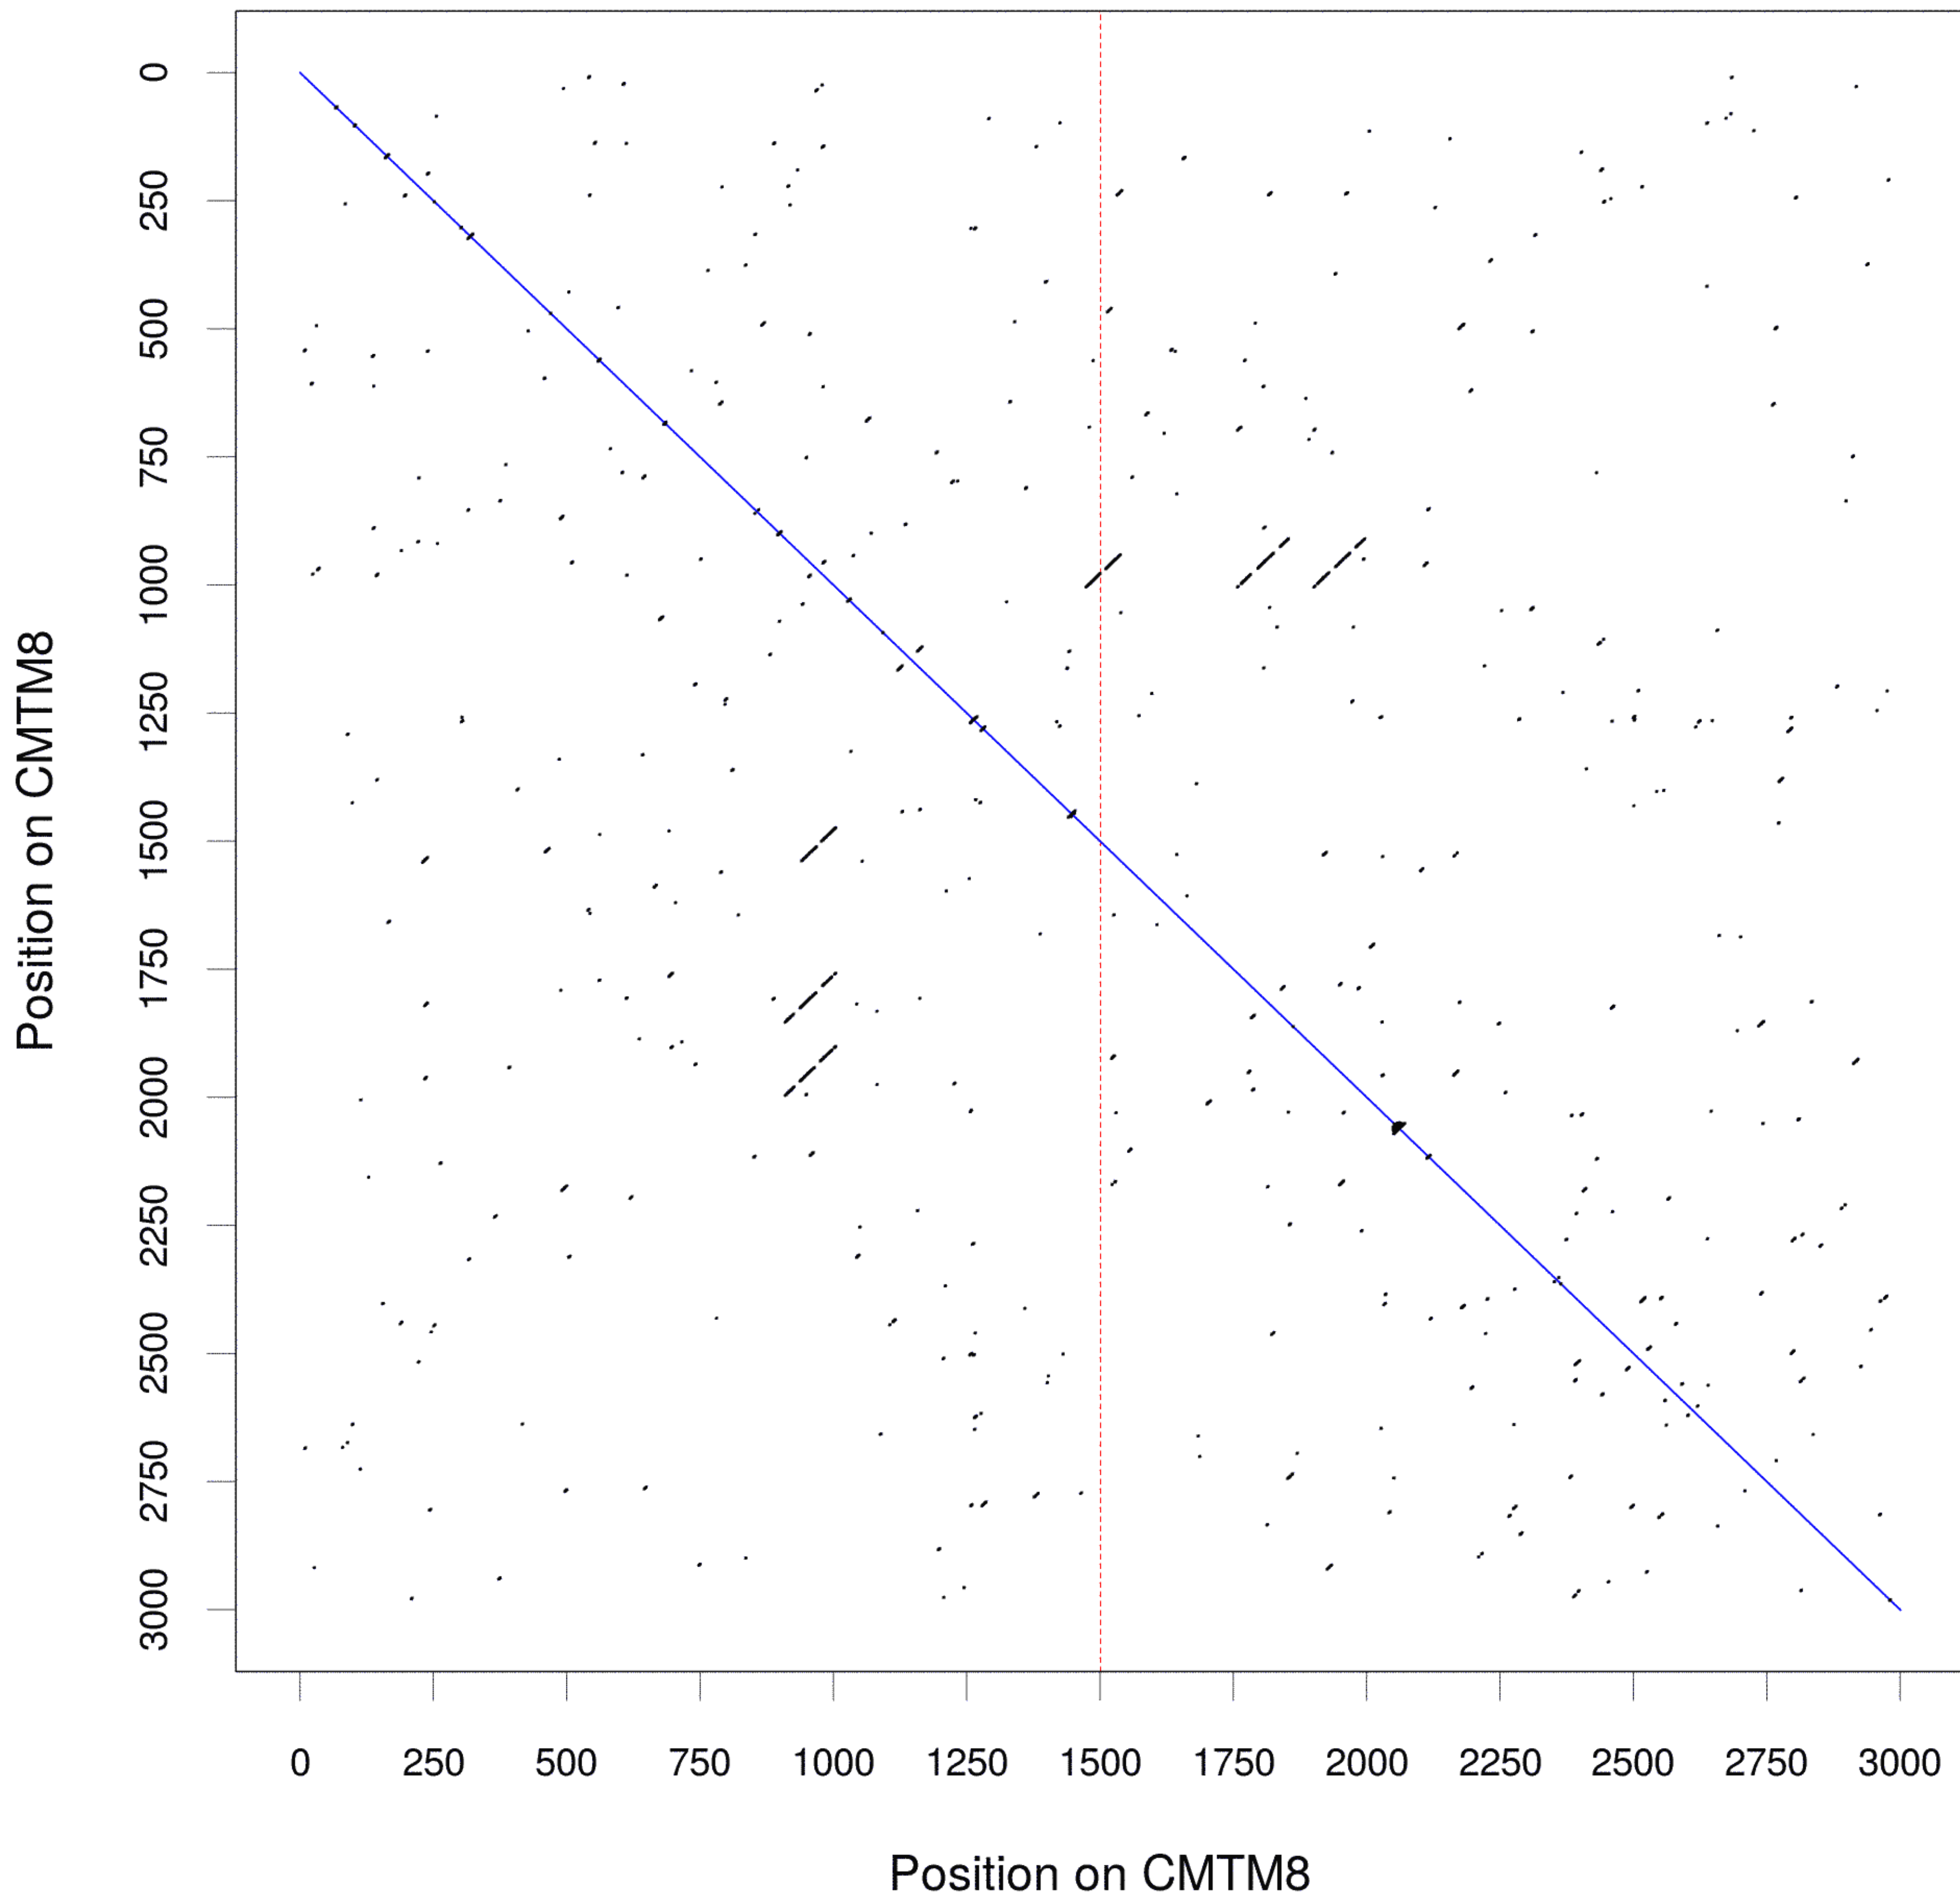

# CNOT11

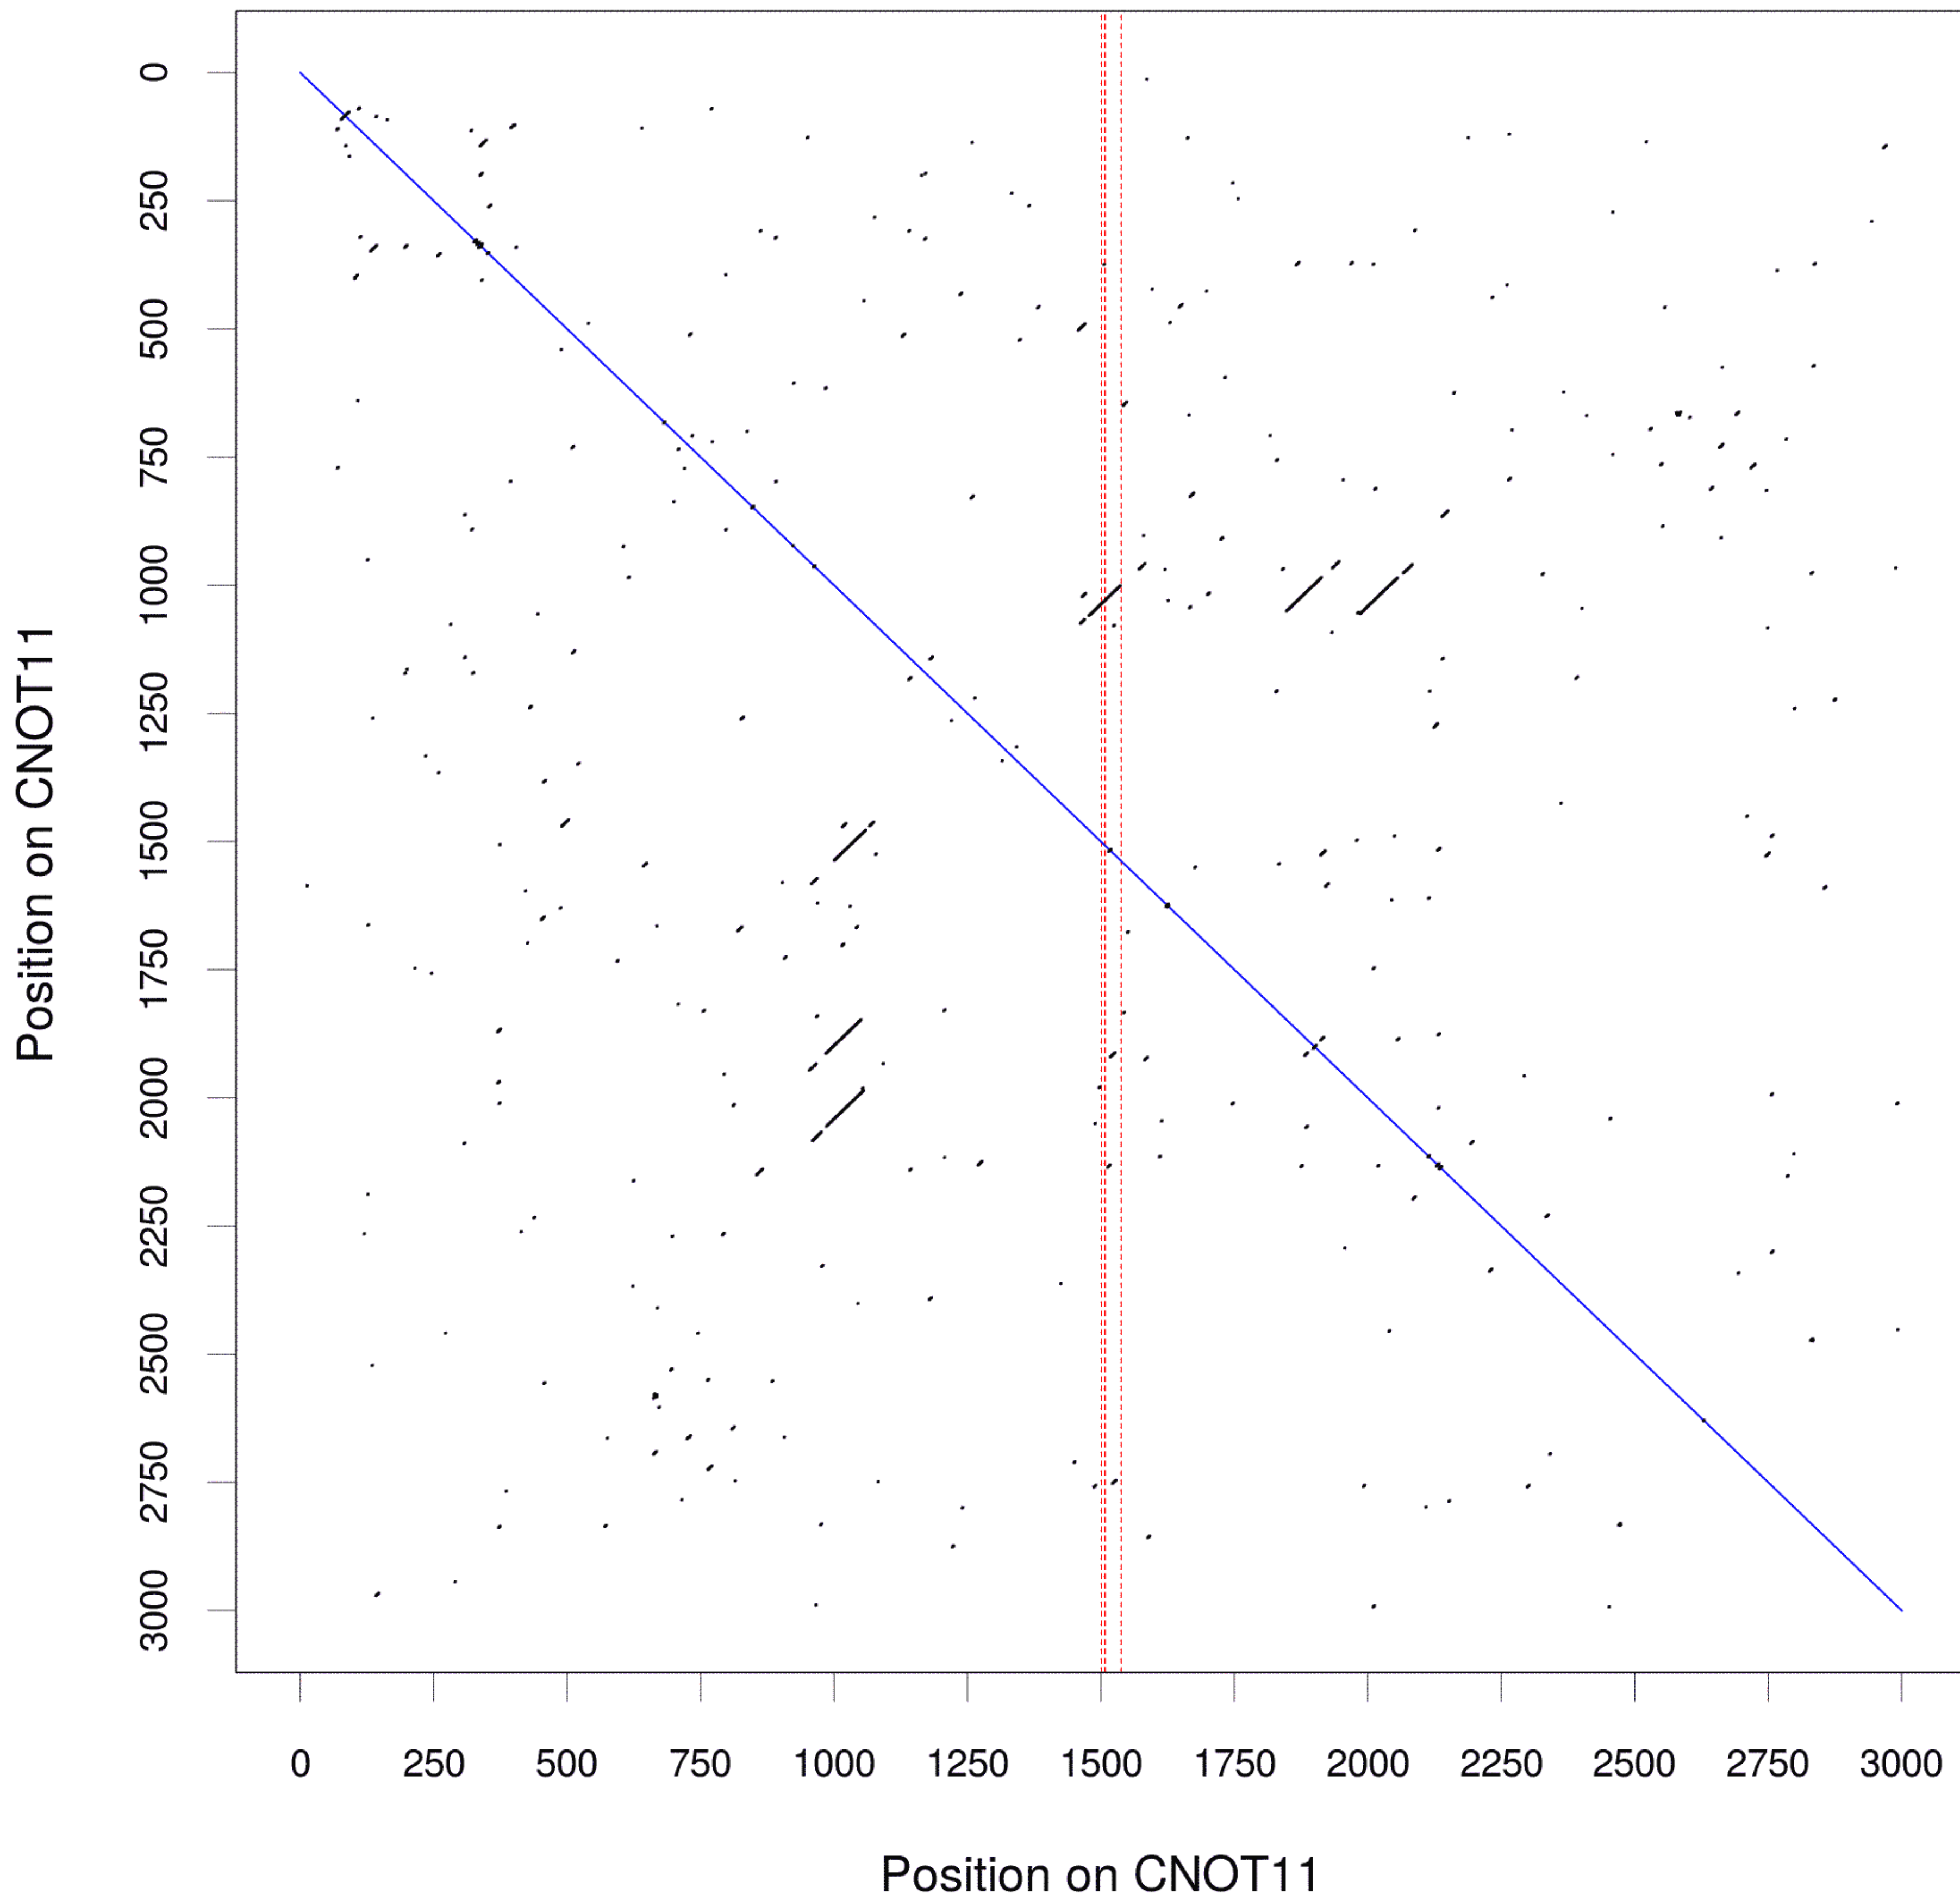



# CNTFR

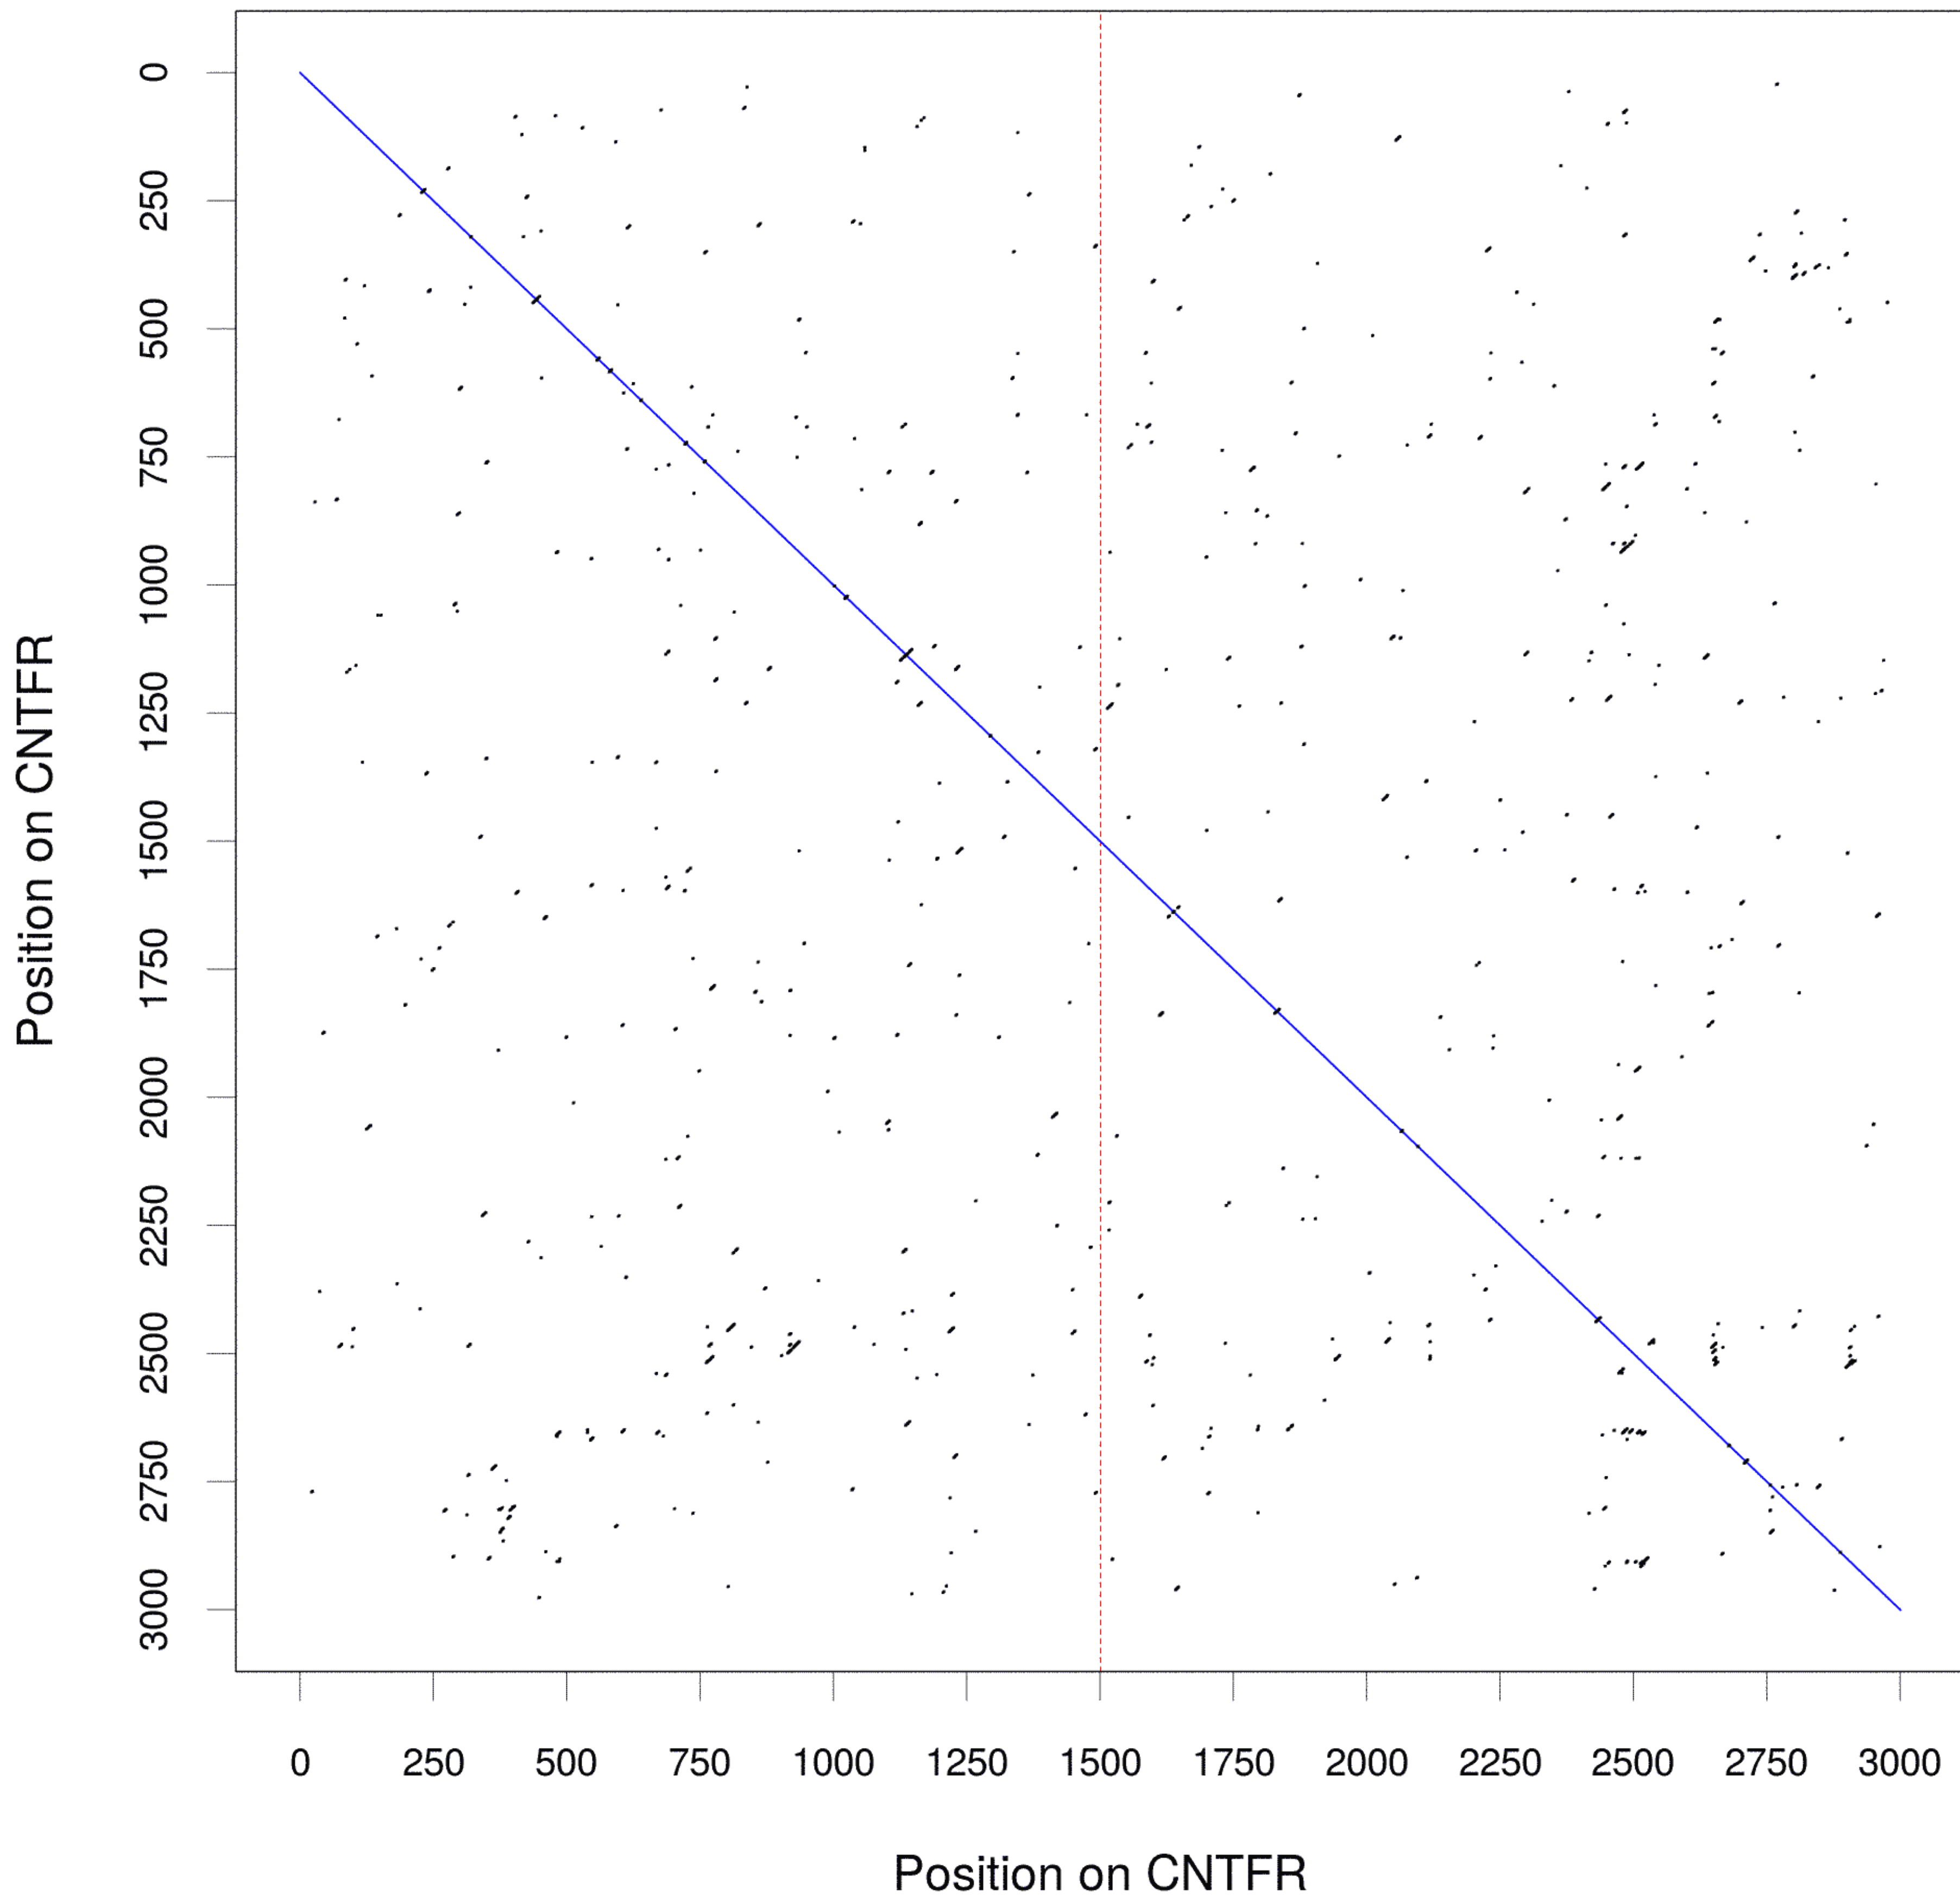

# COG3

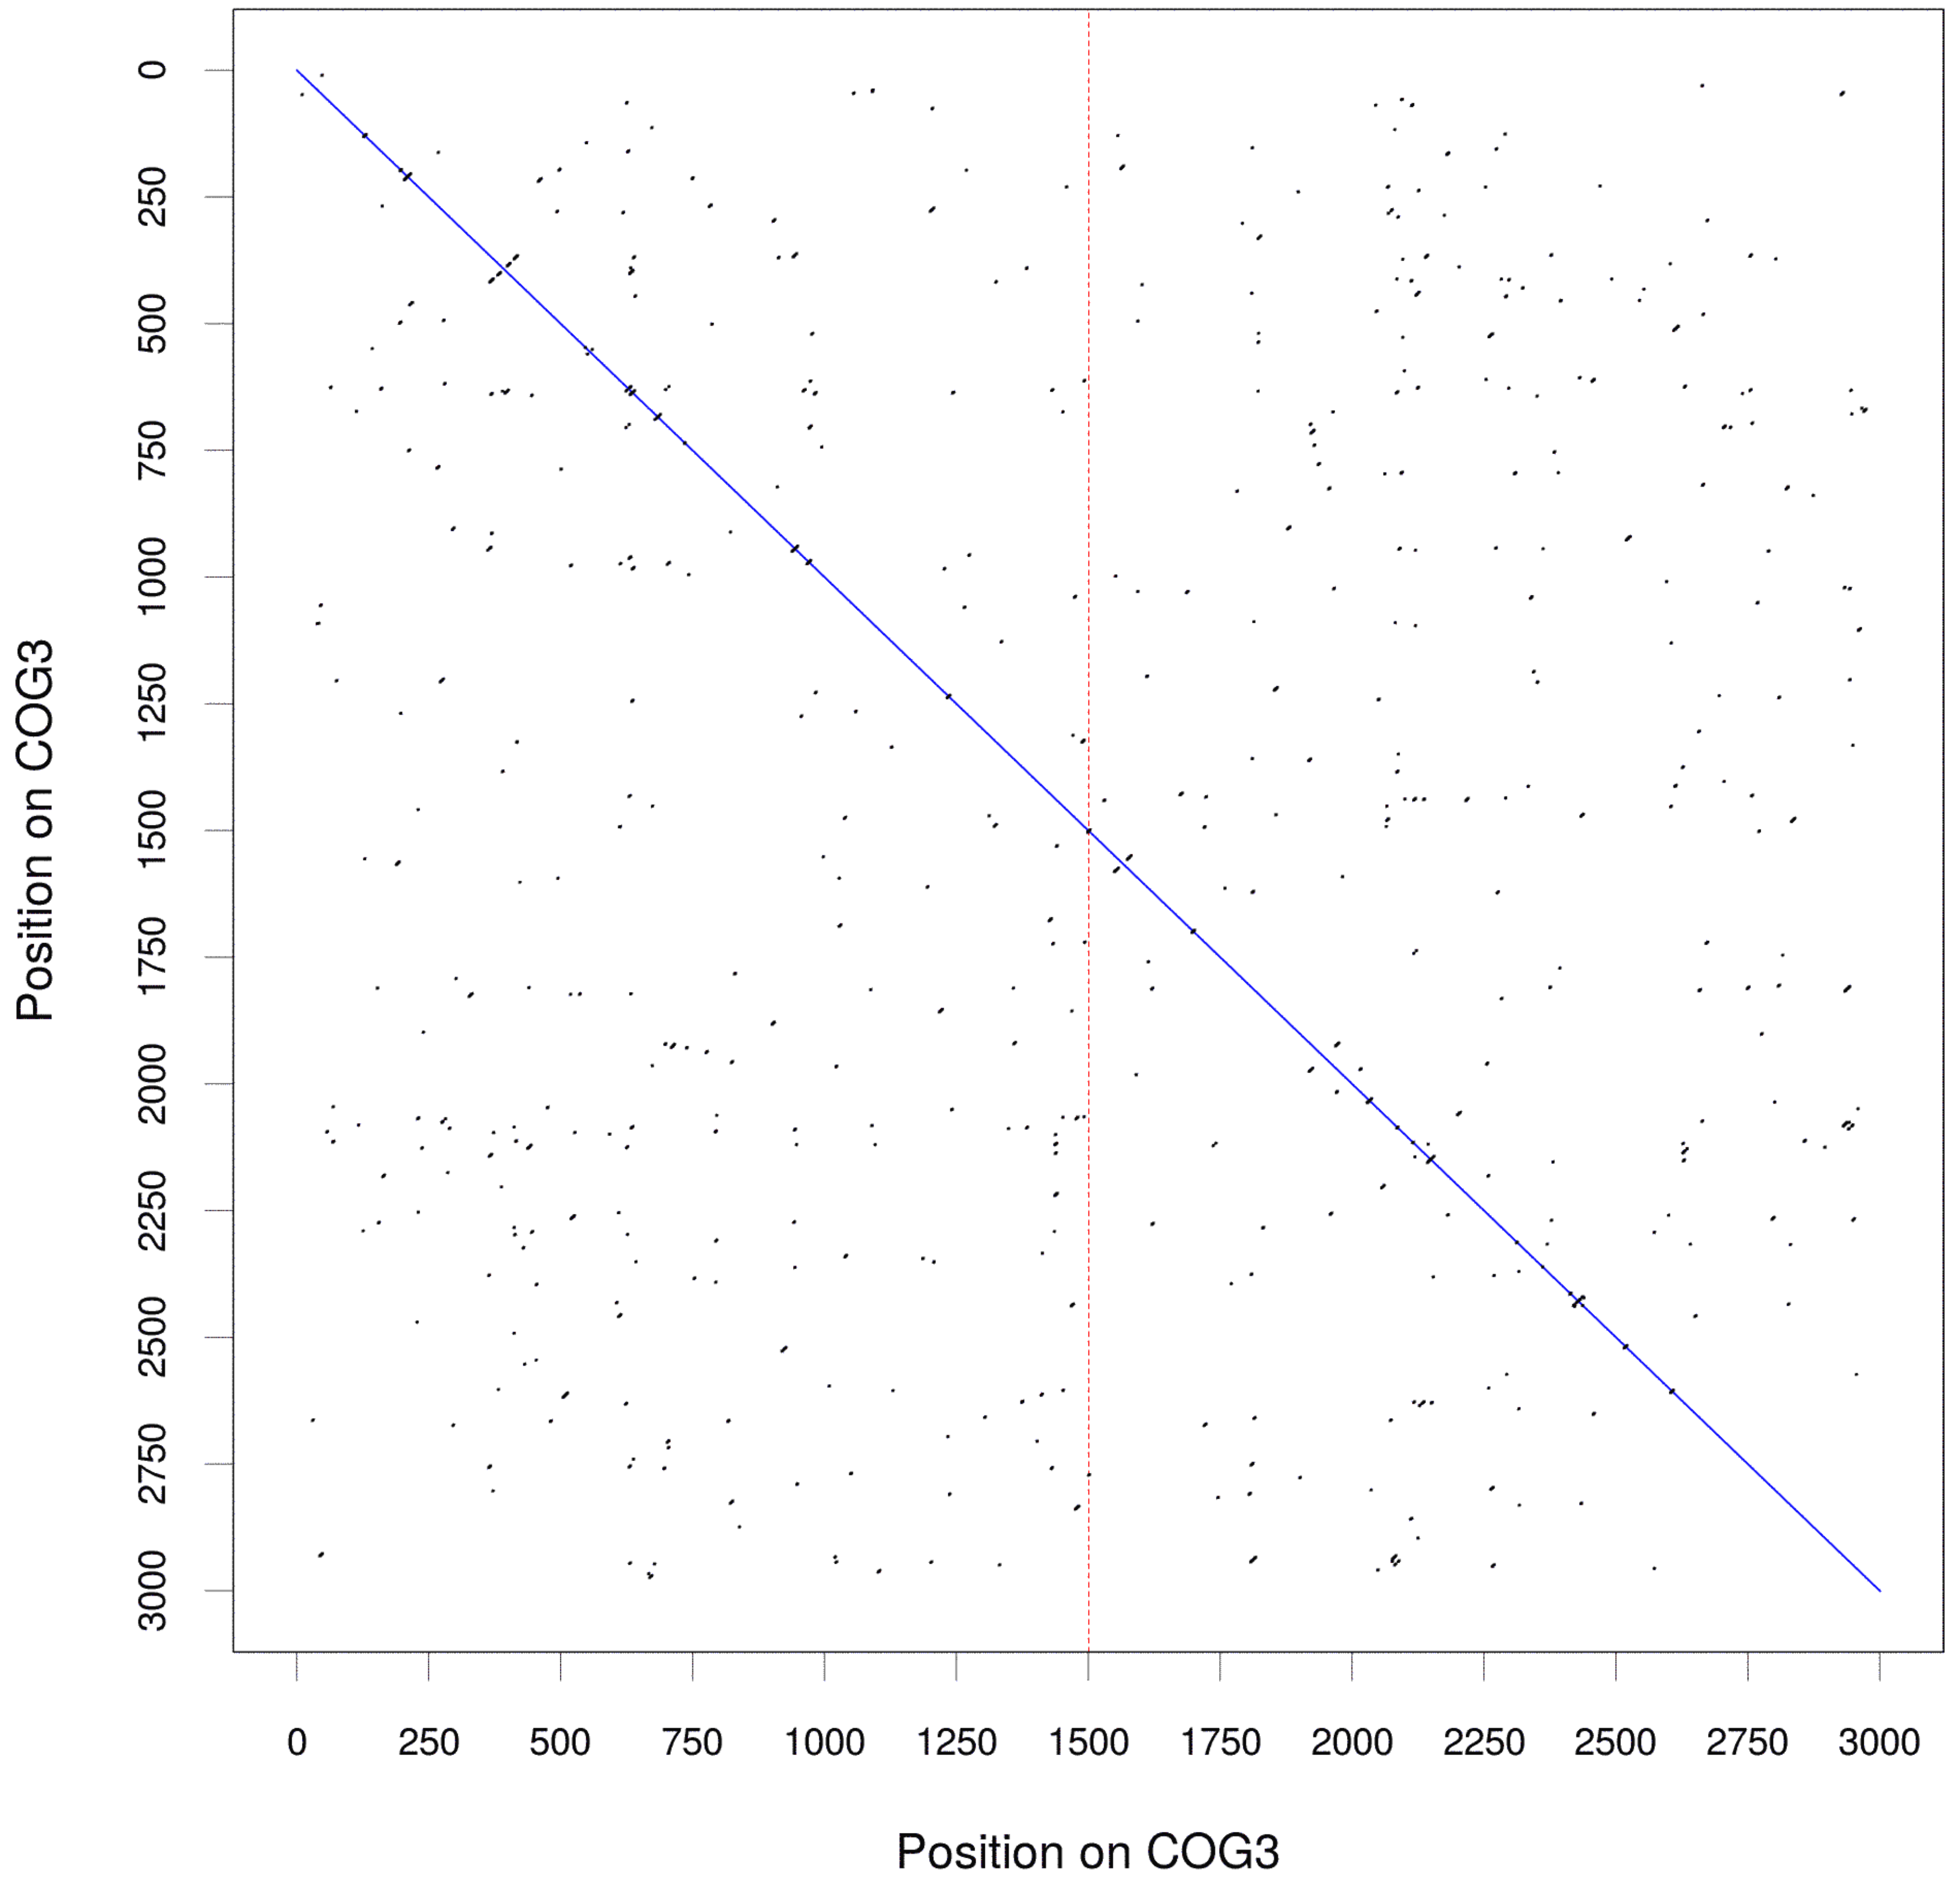

# COG5

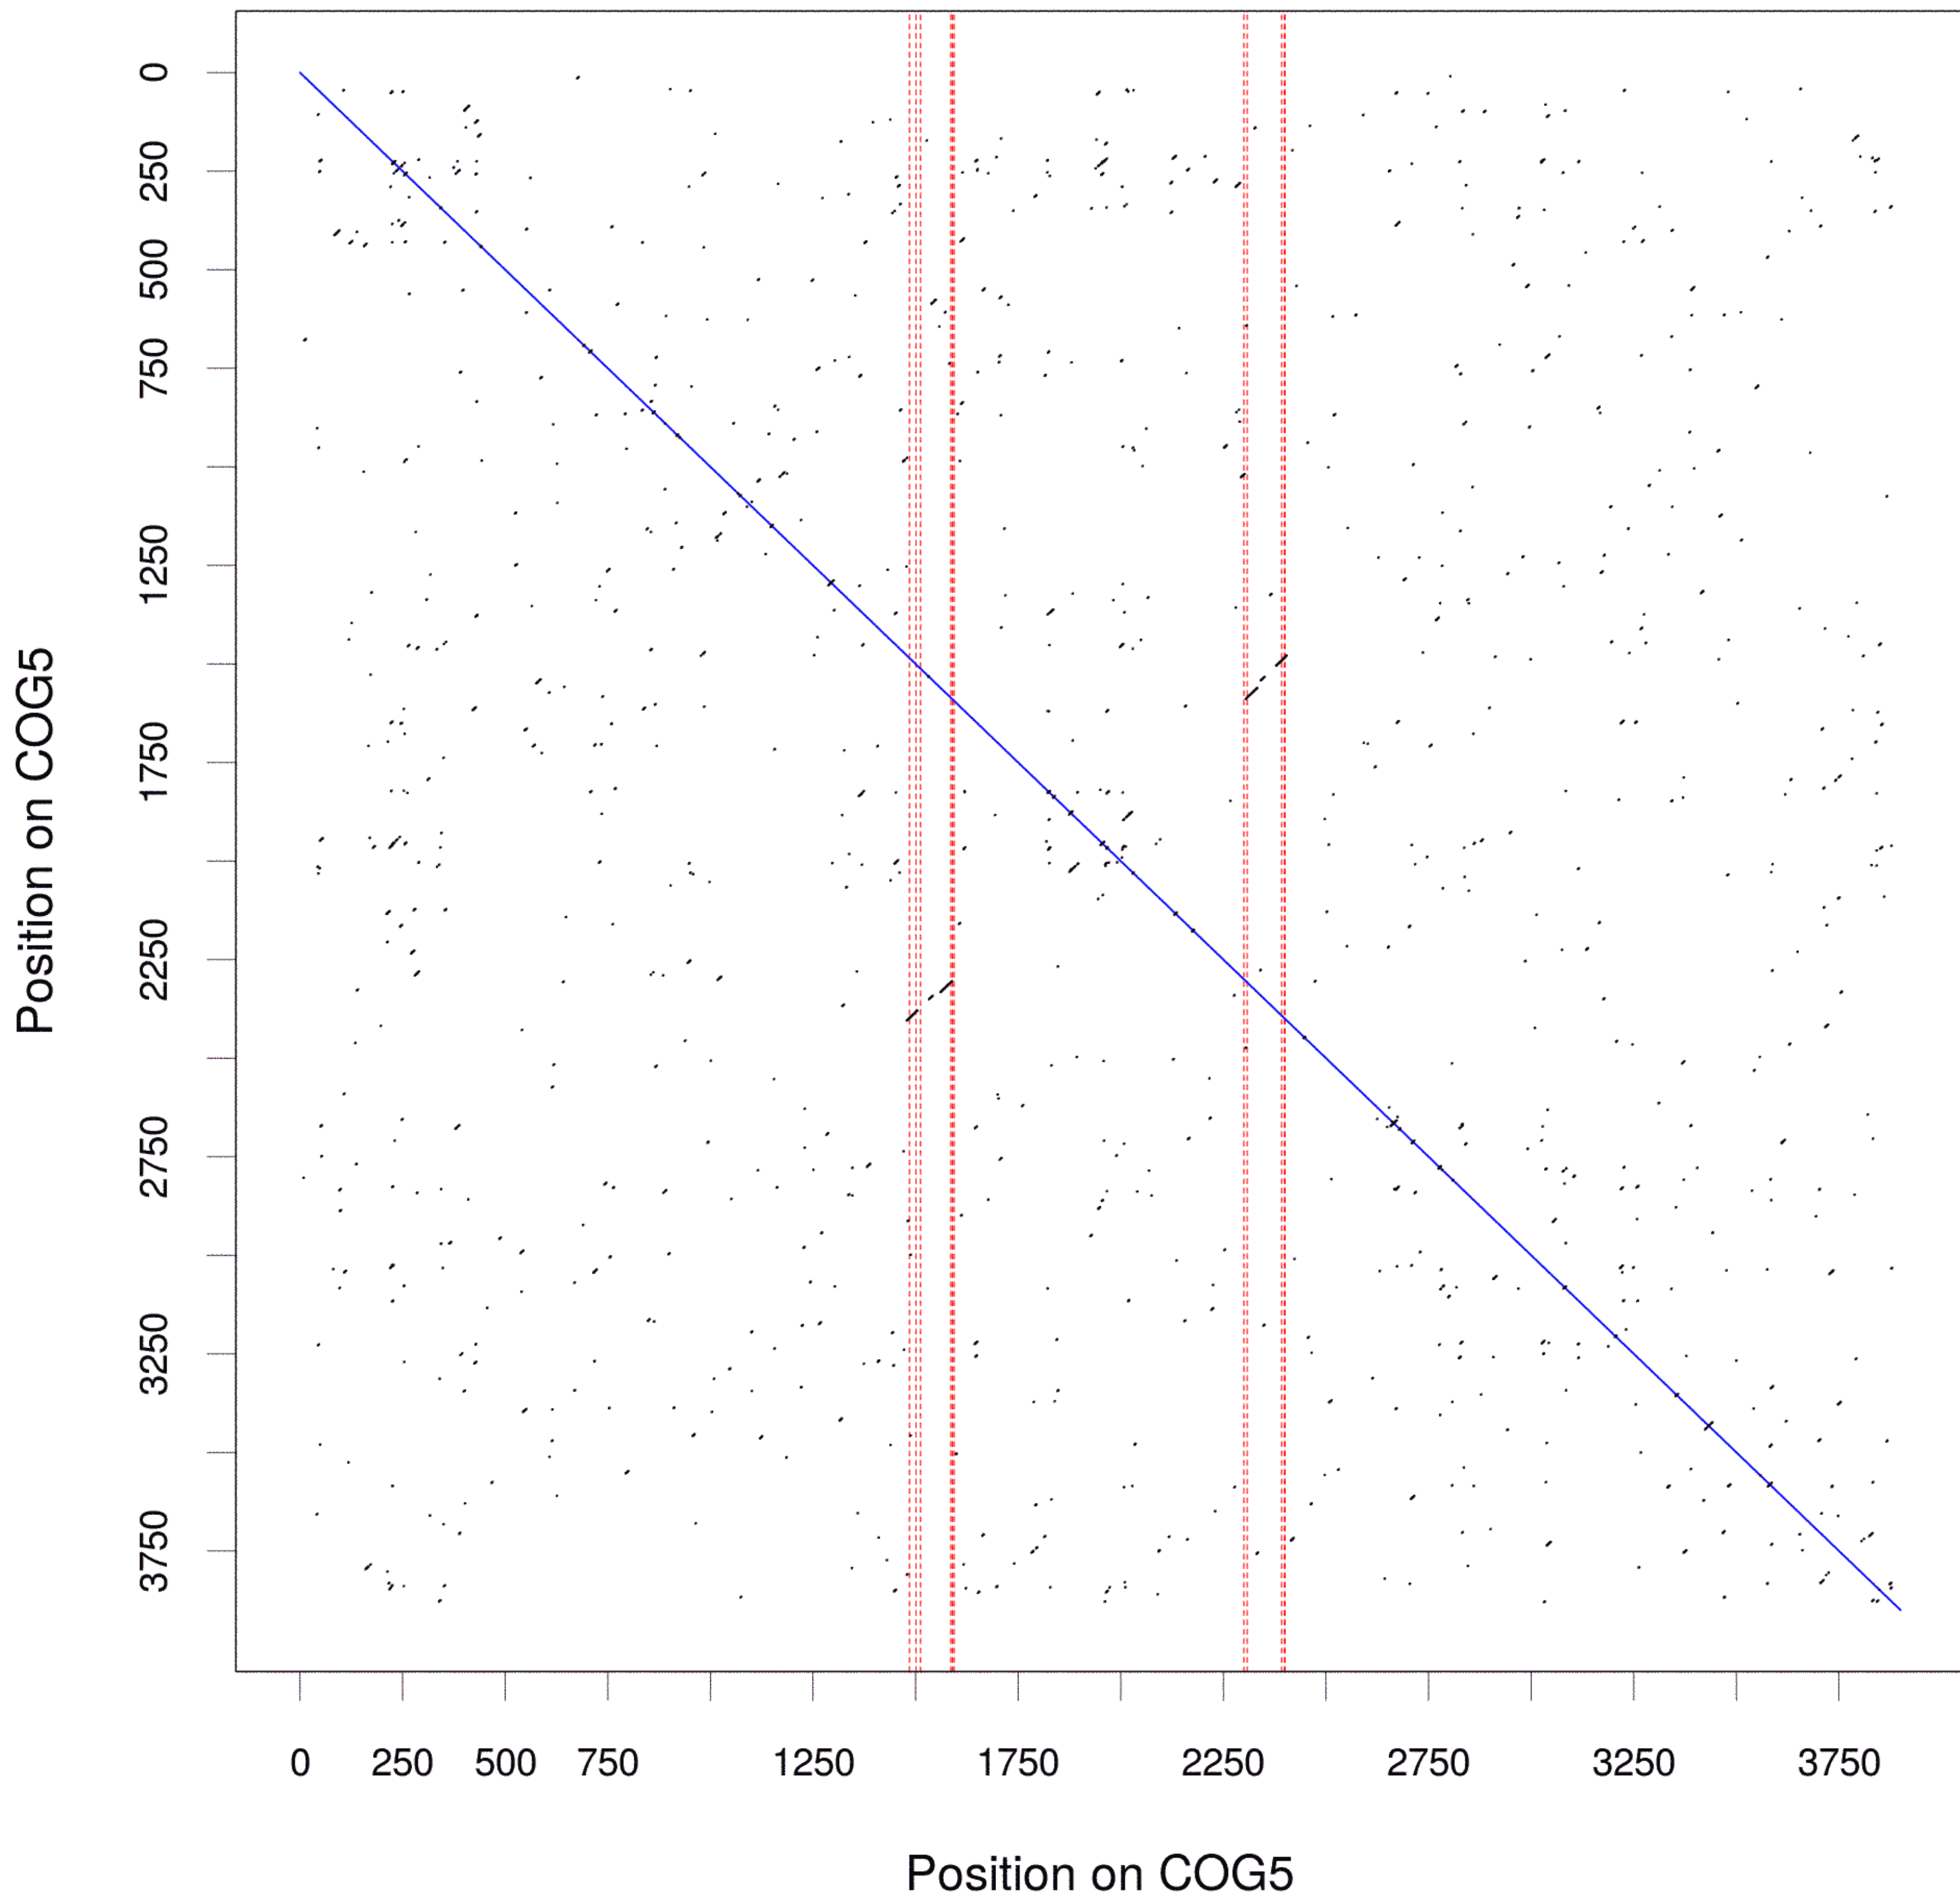

# COL6A2

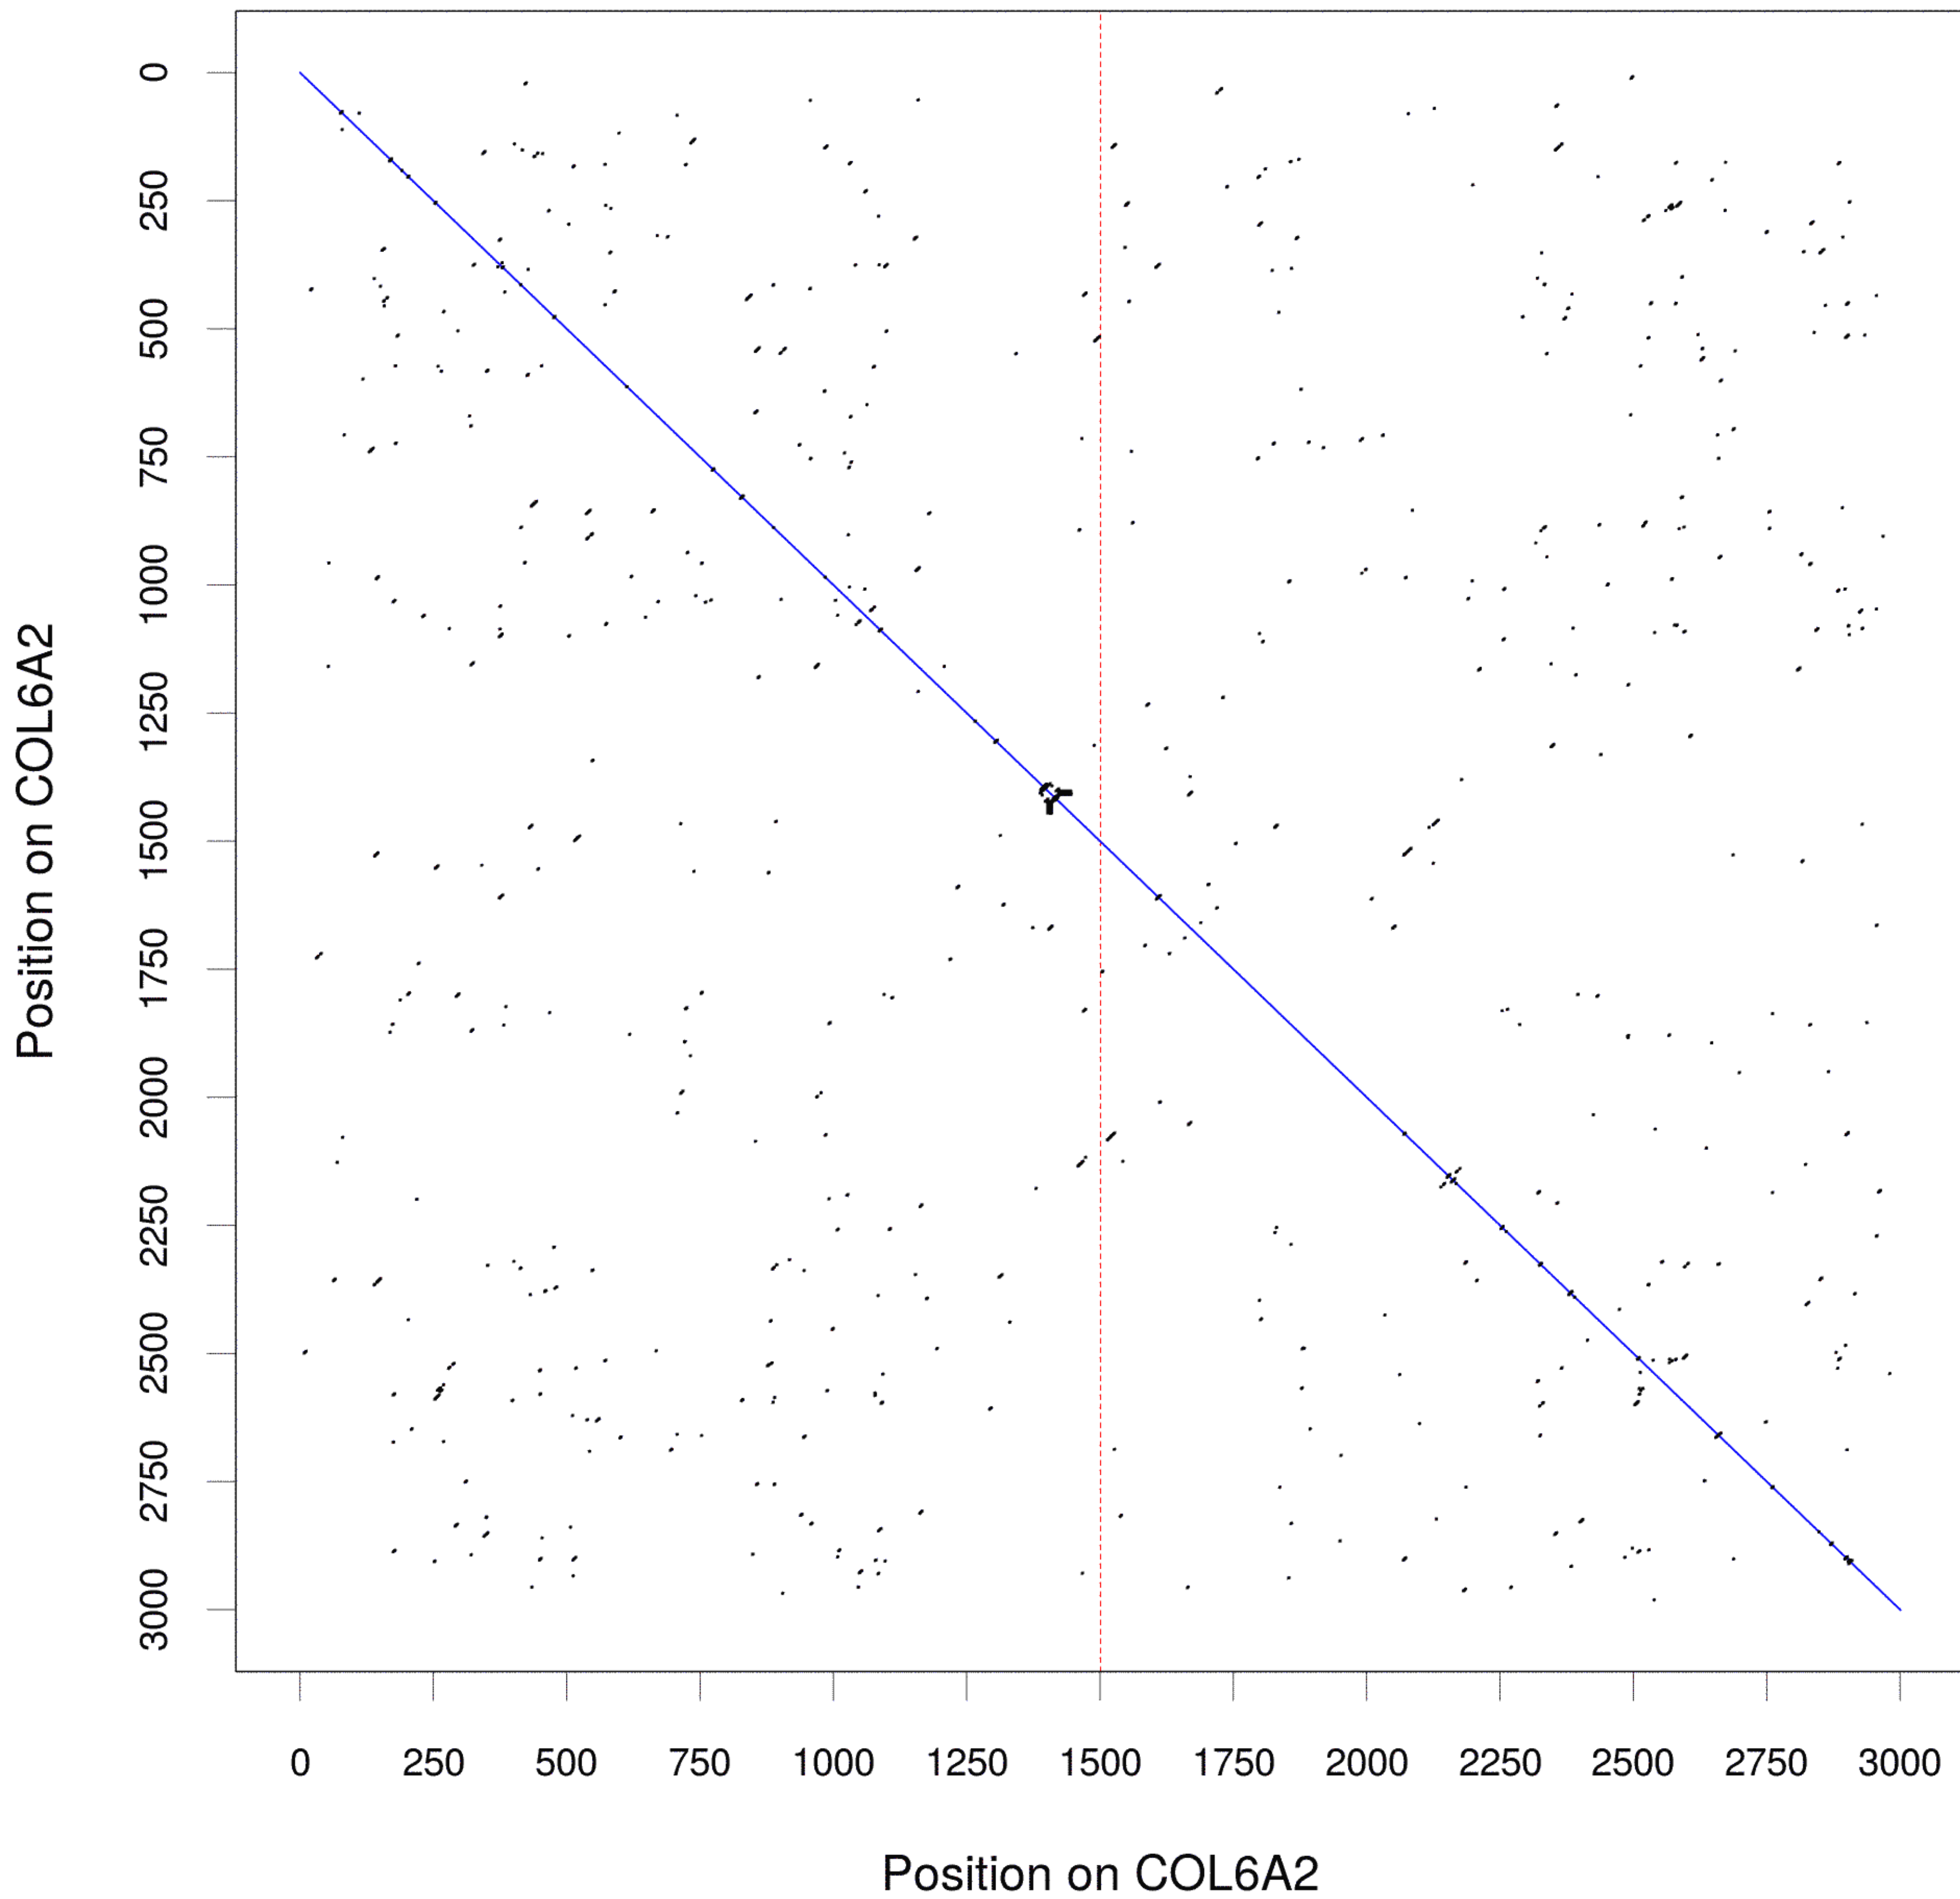

# COPA

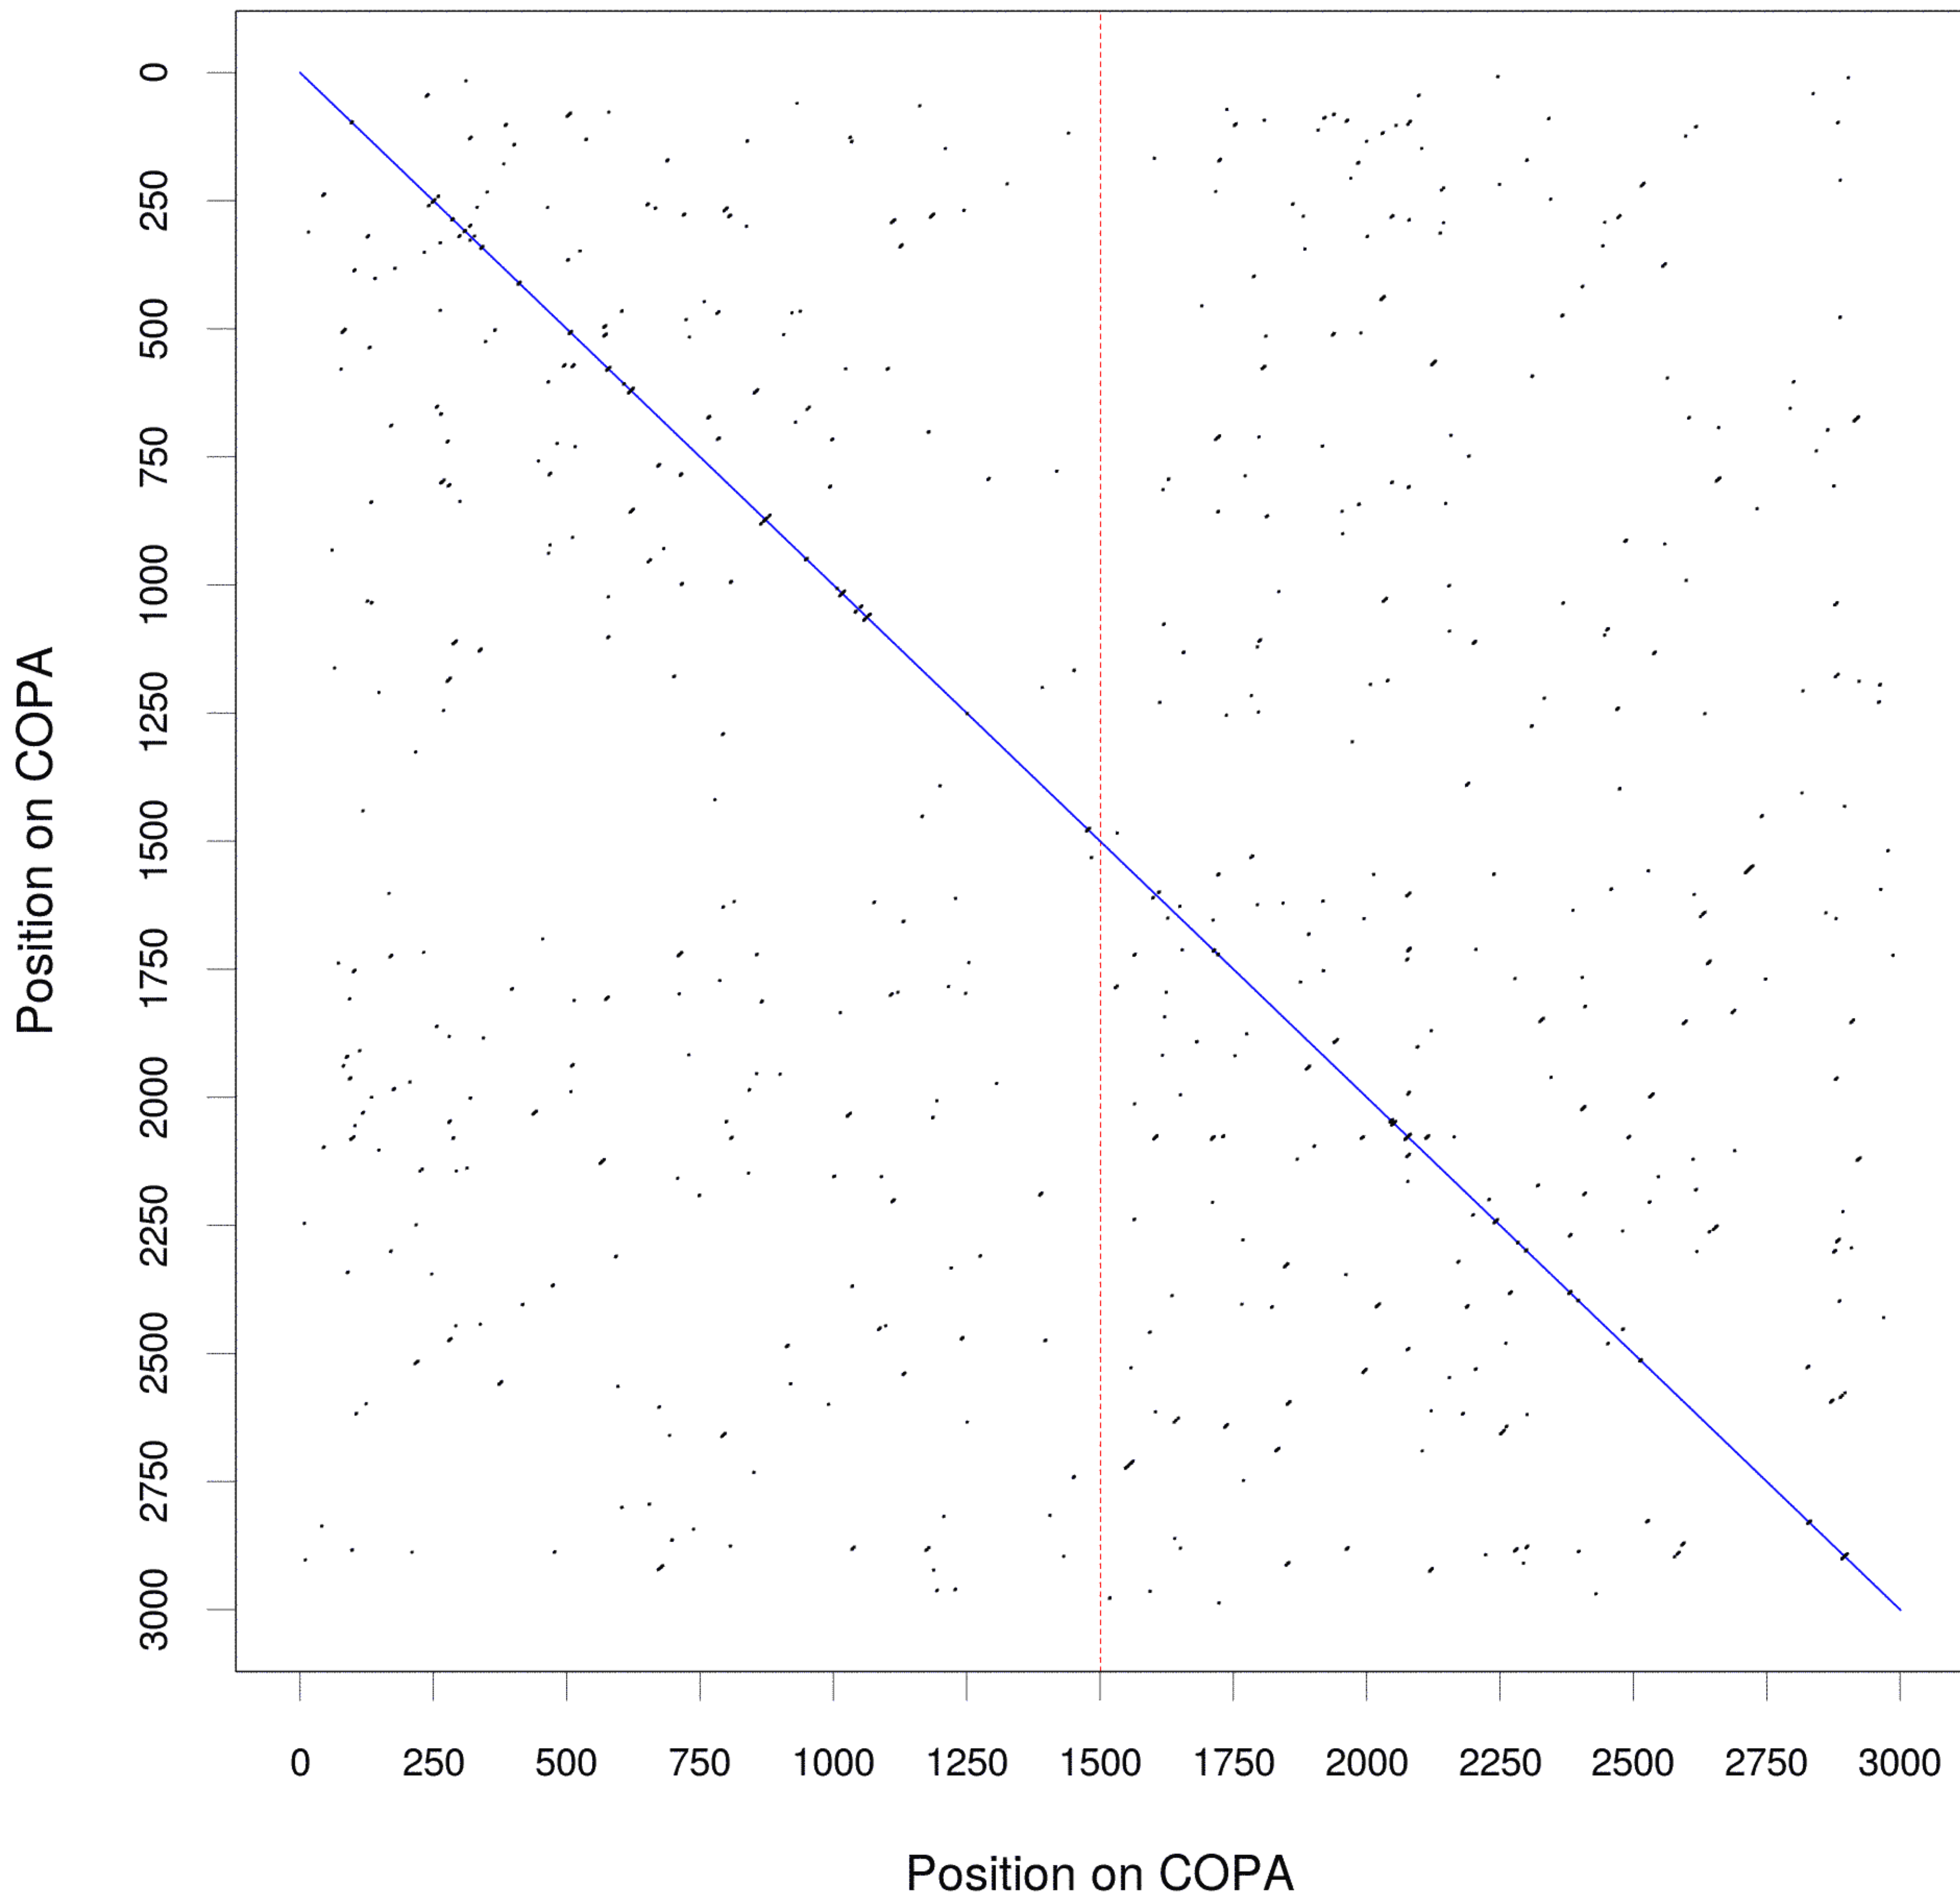

# COPS3

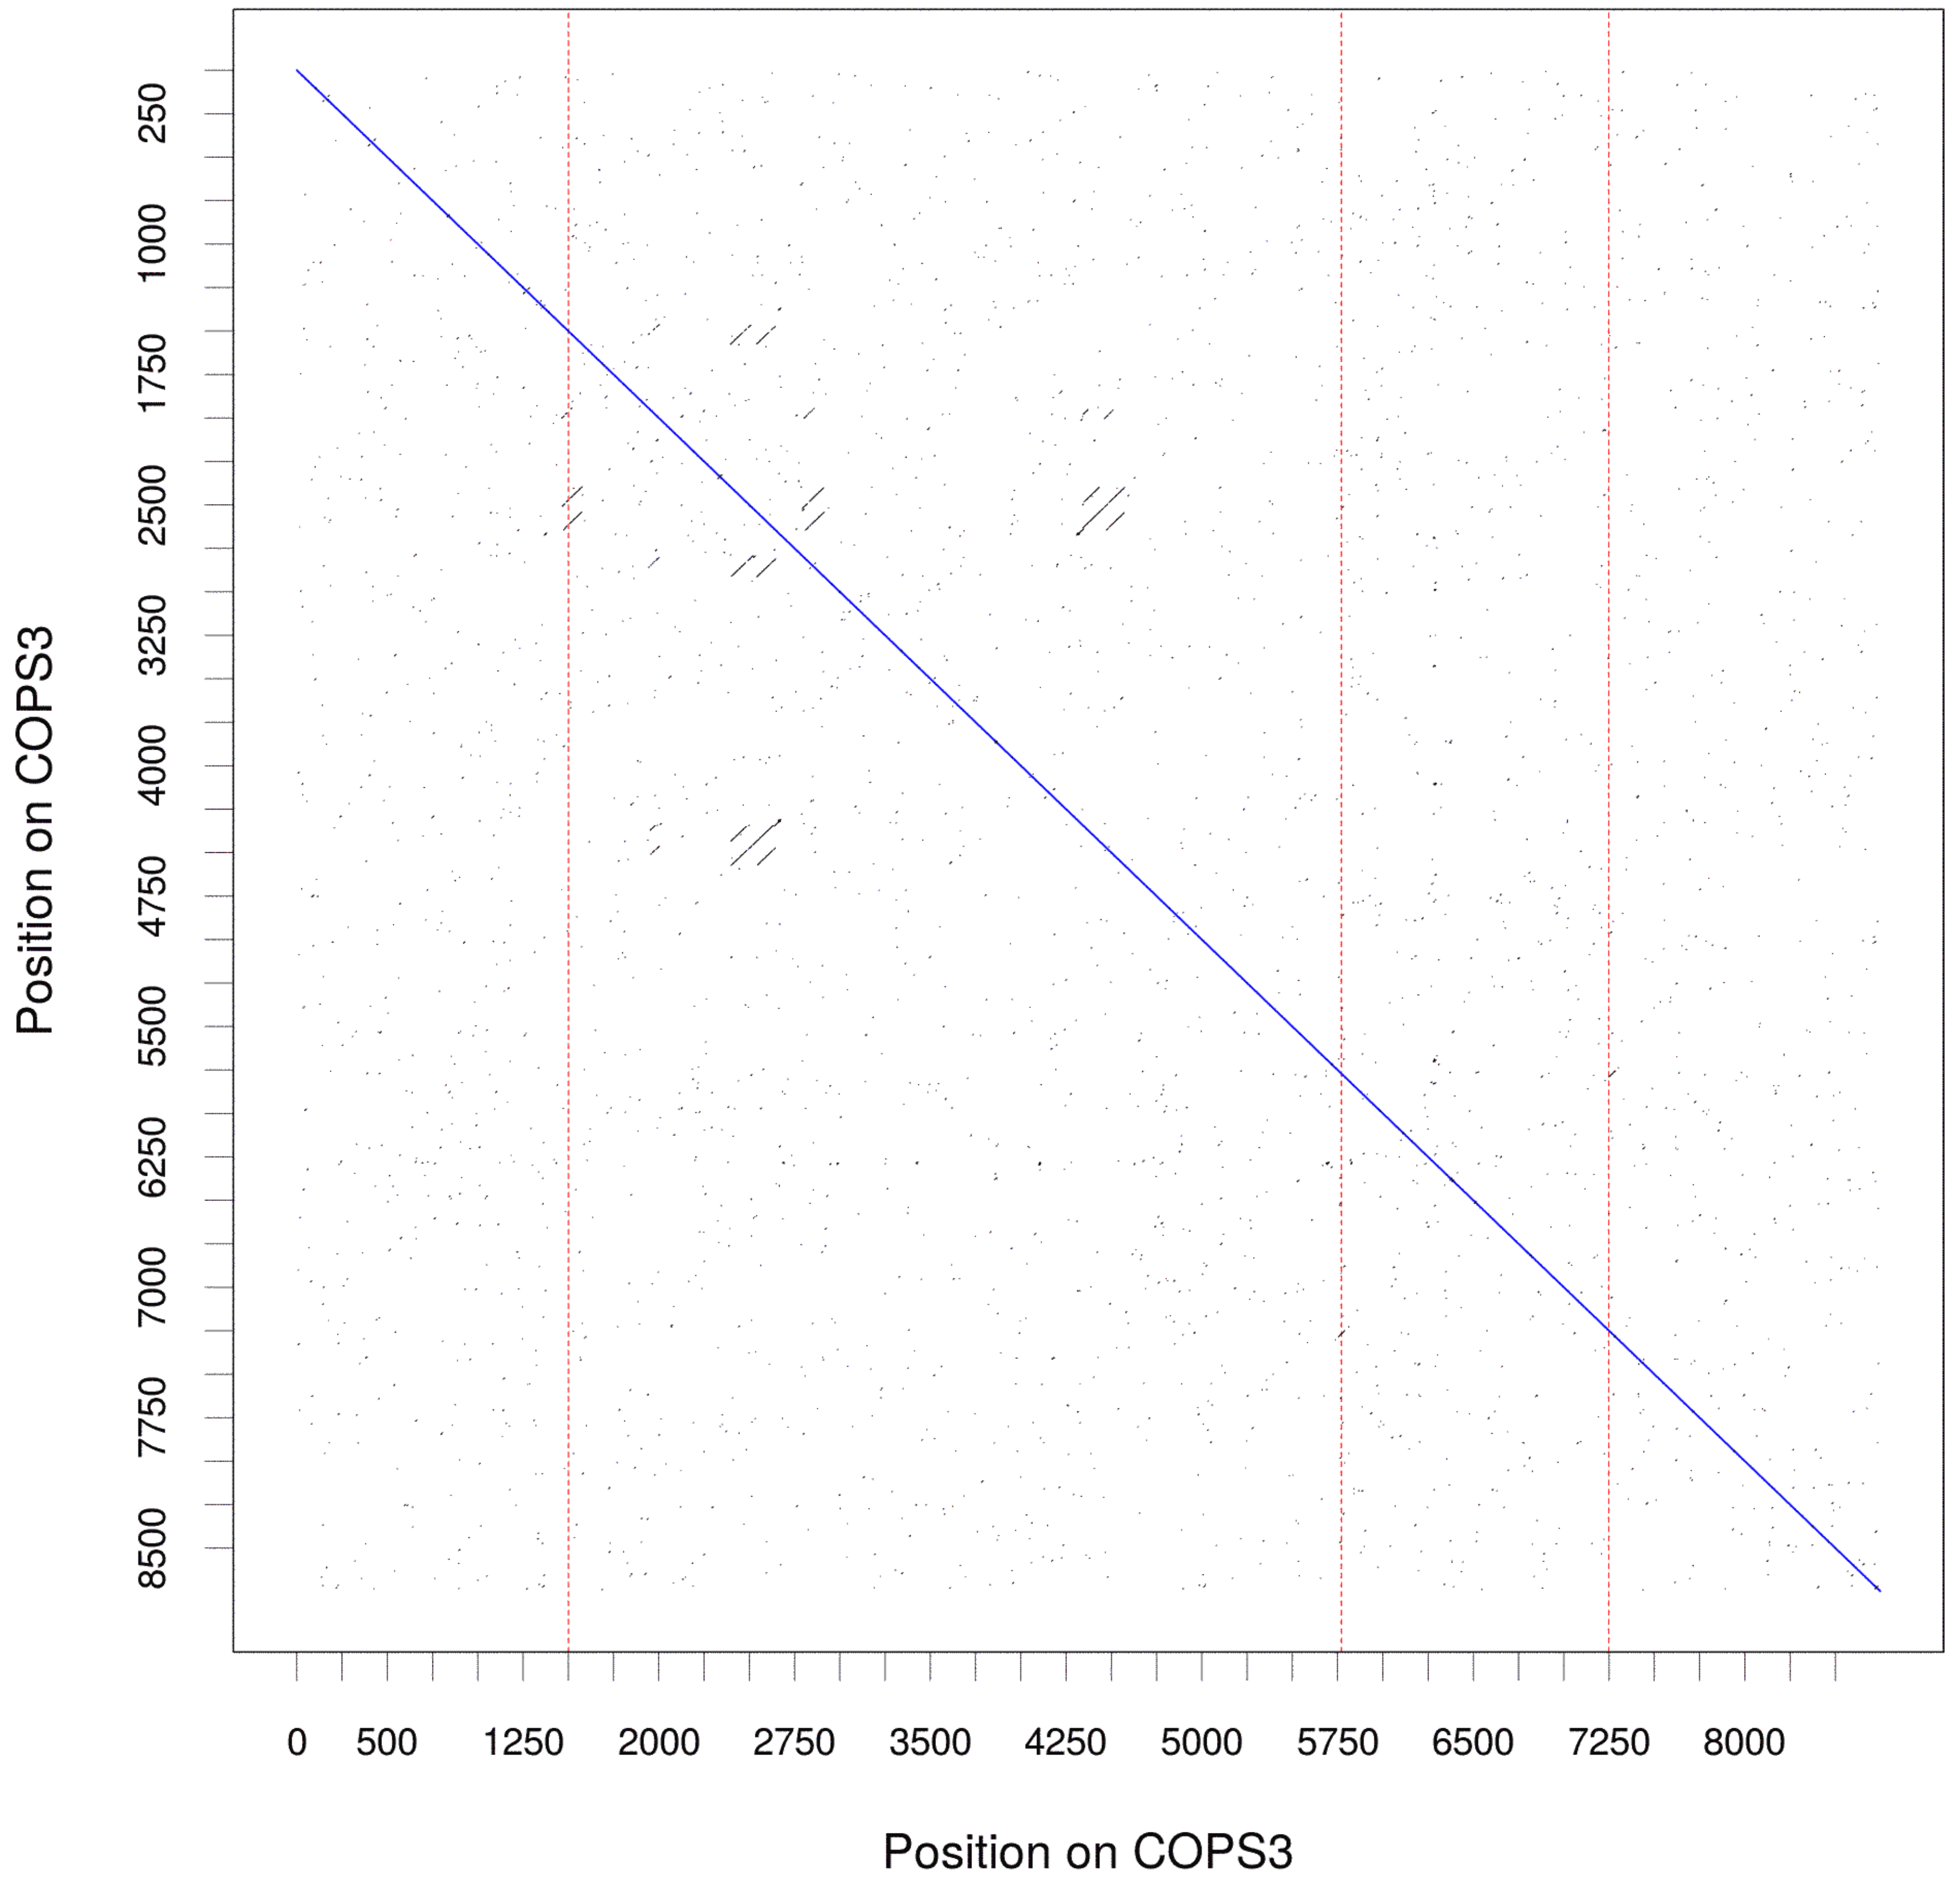

# COQ2

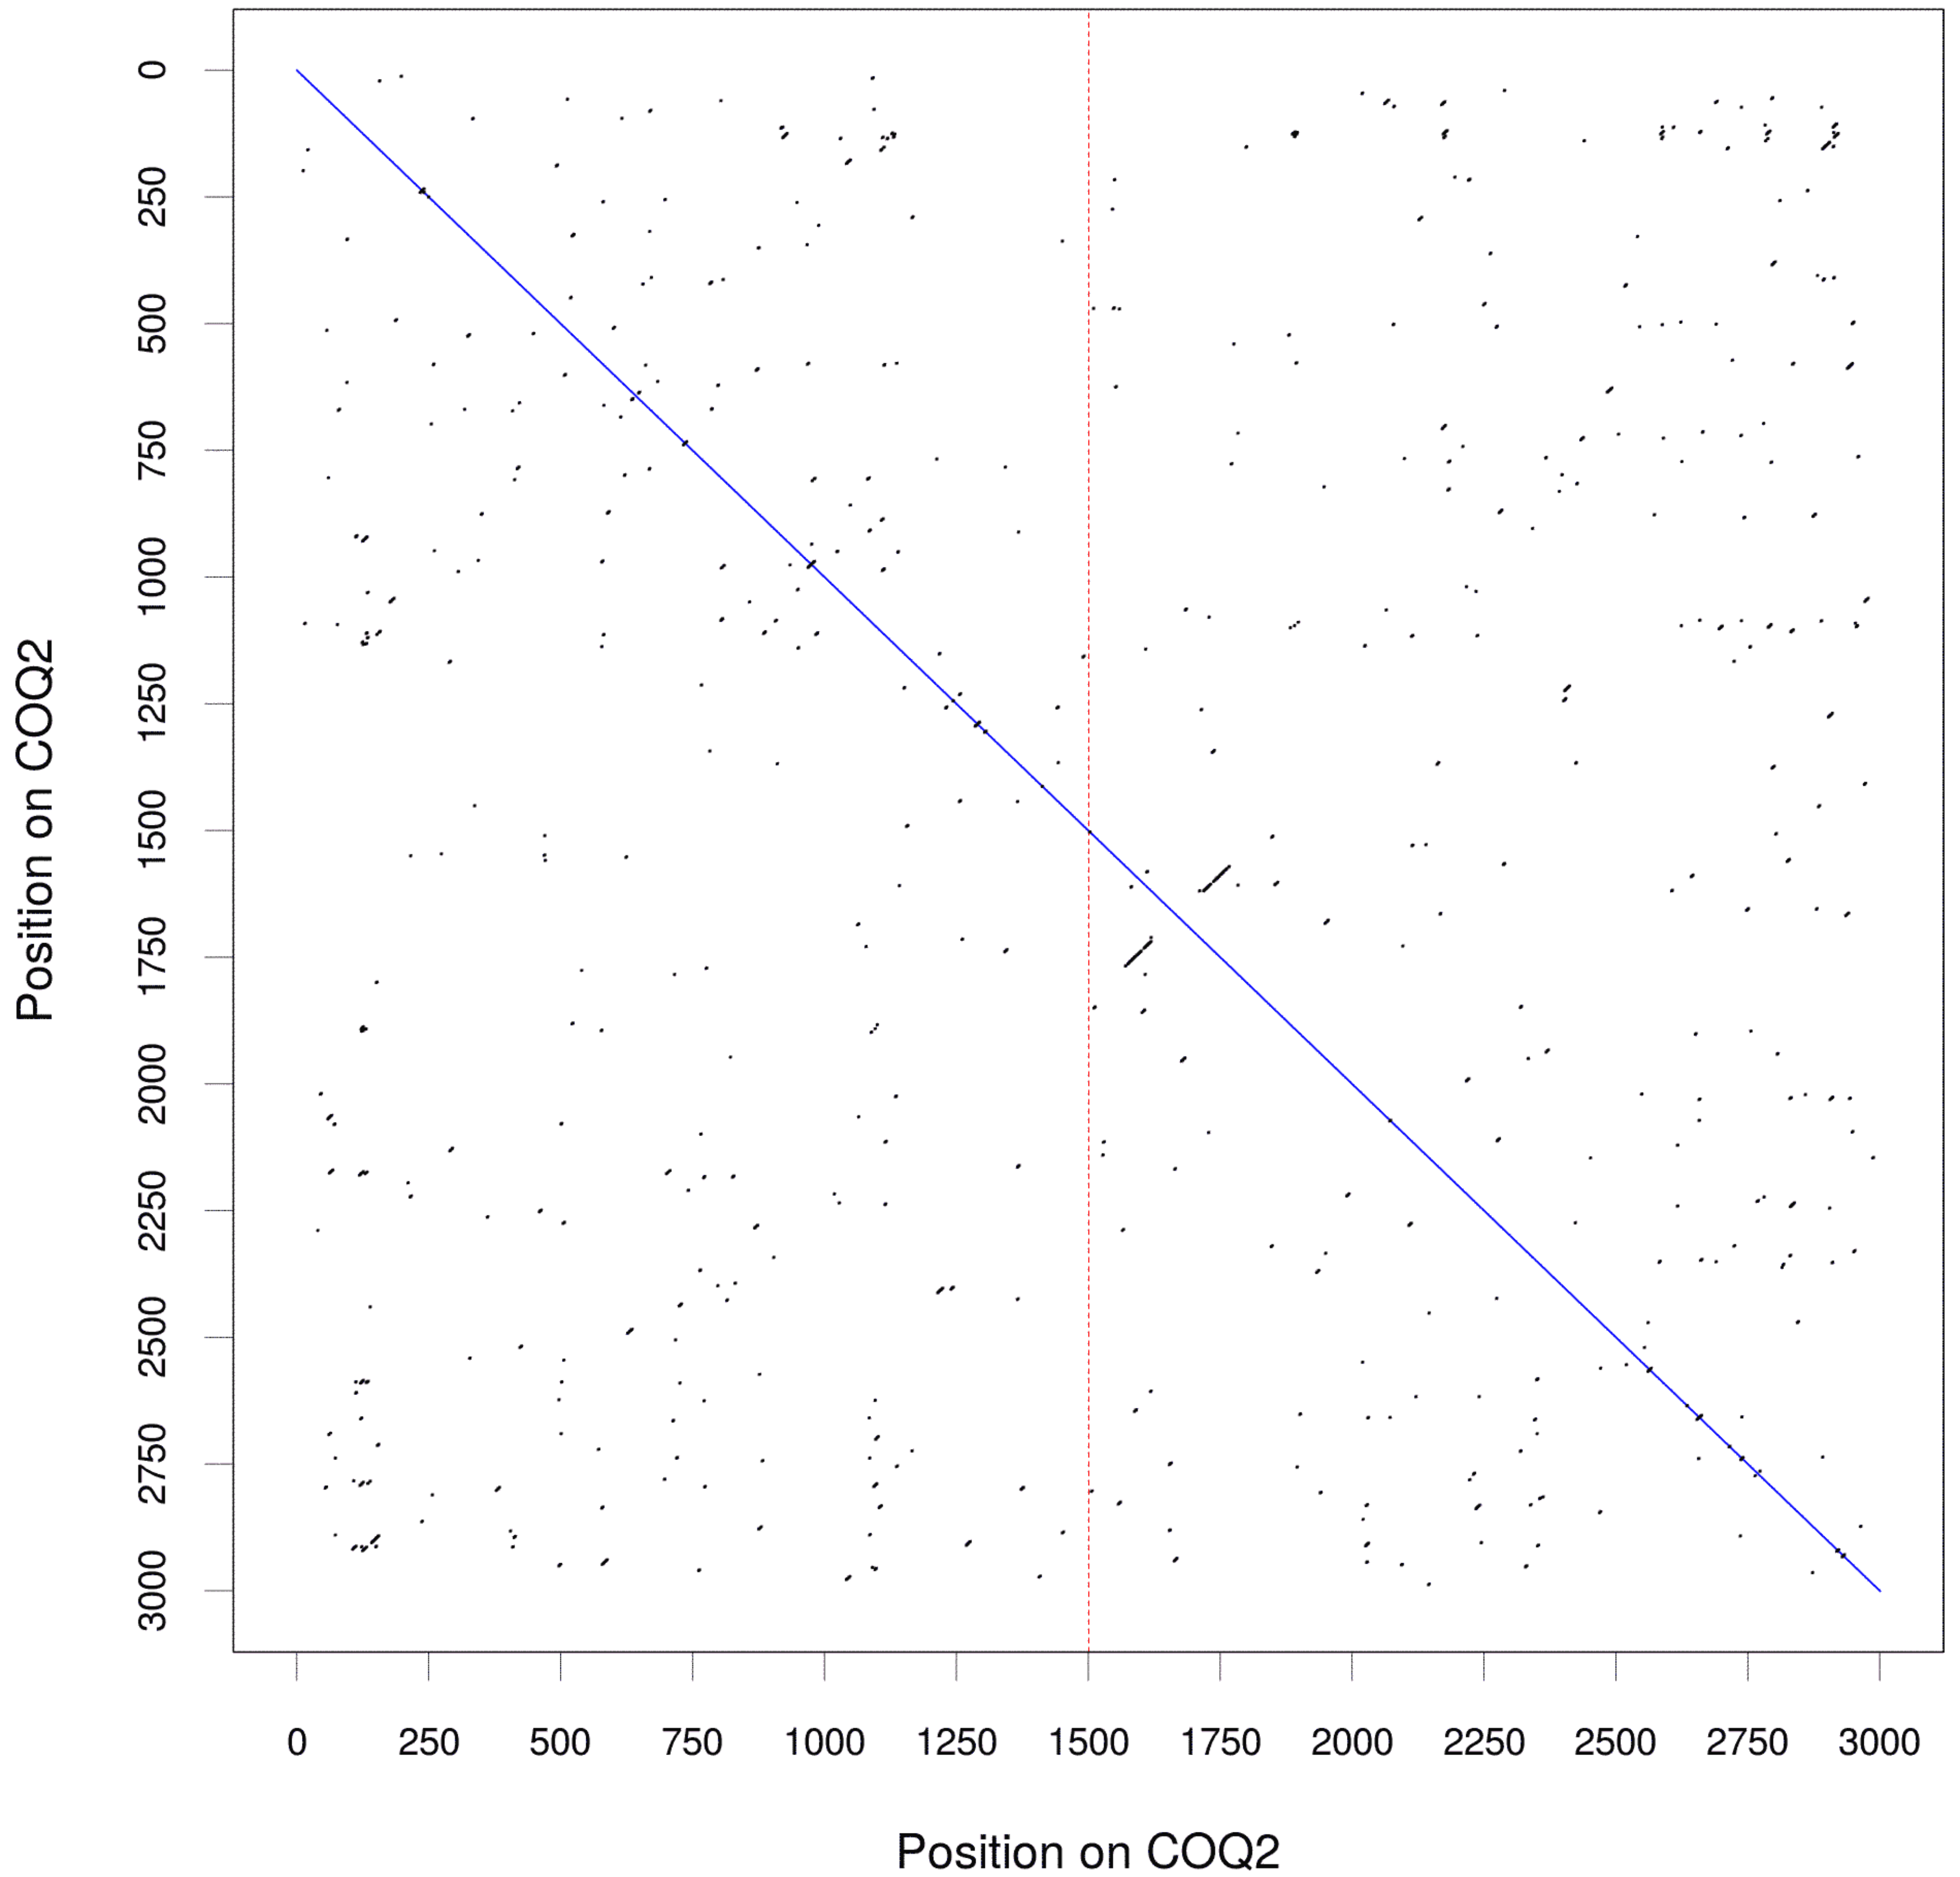

# CPM

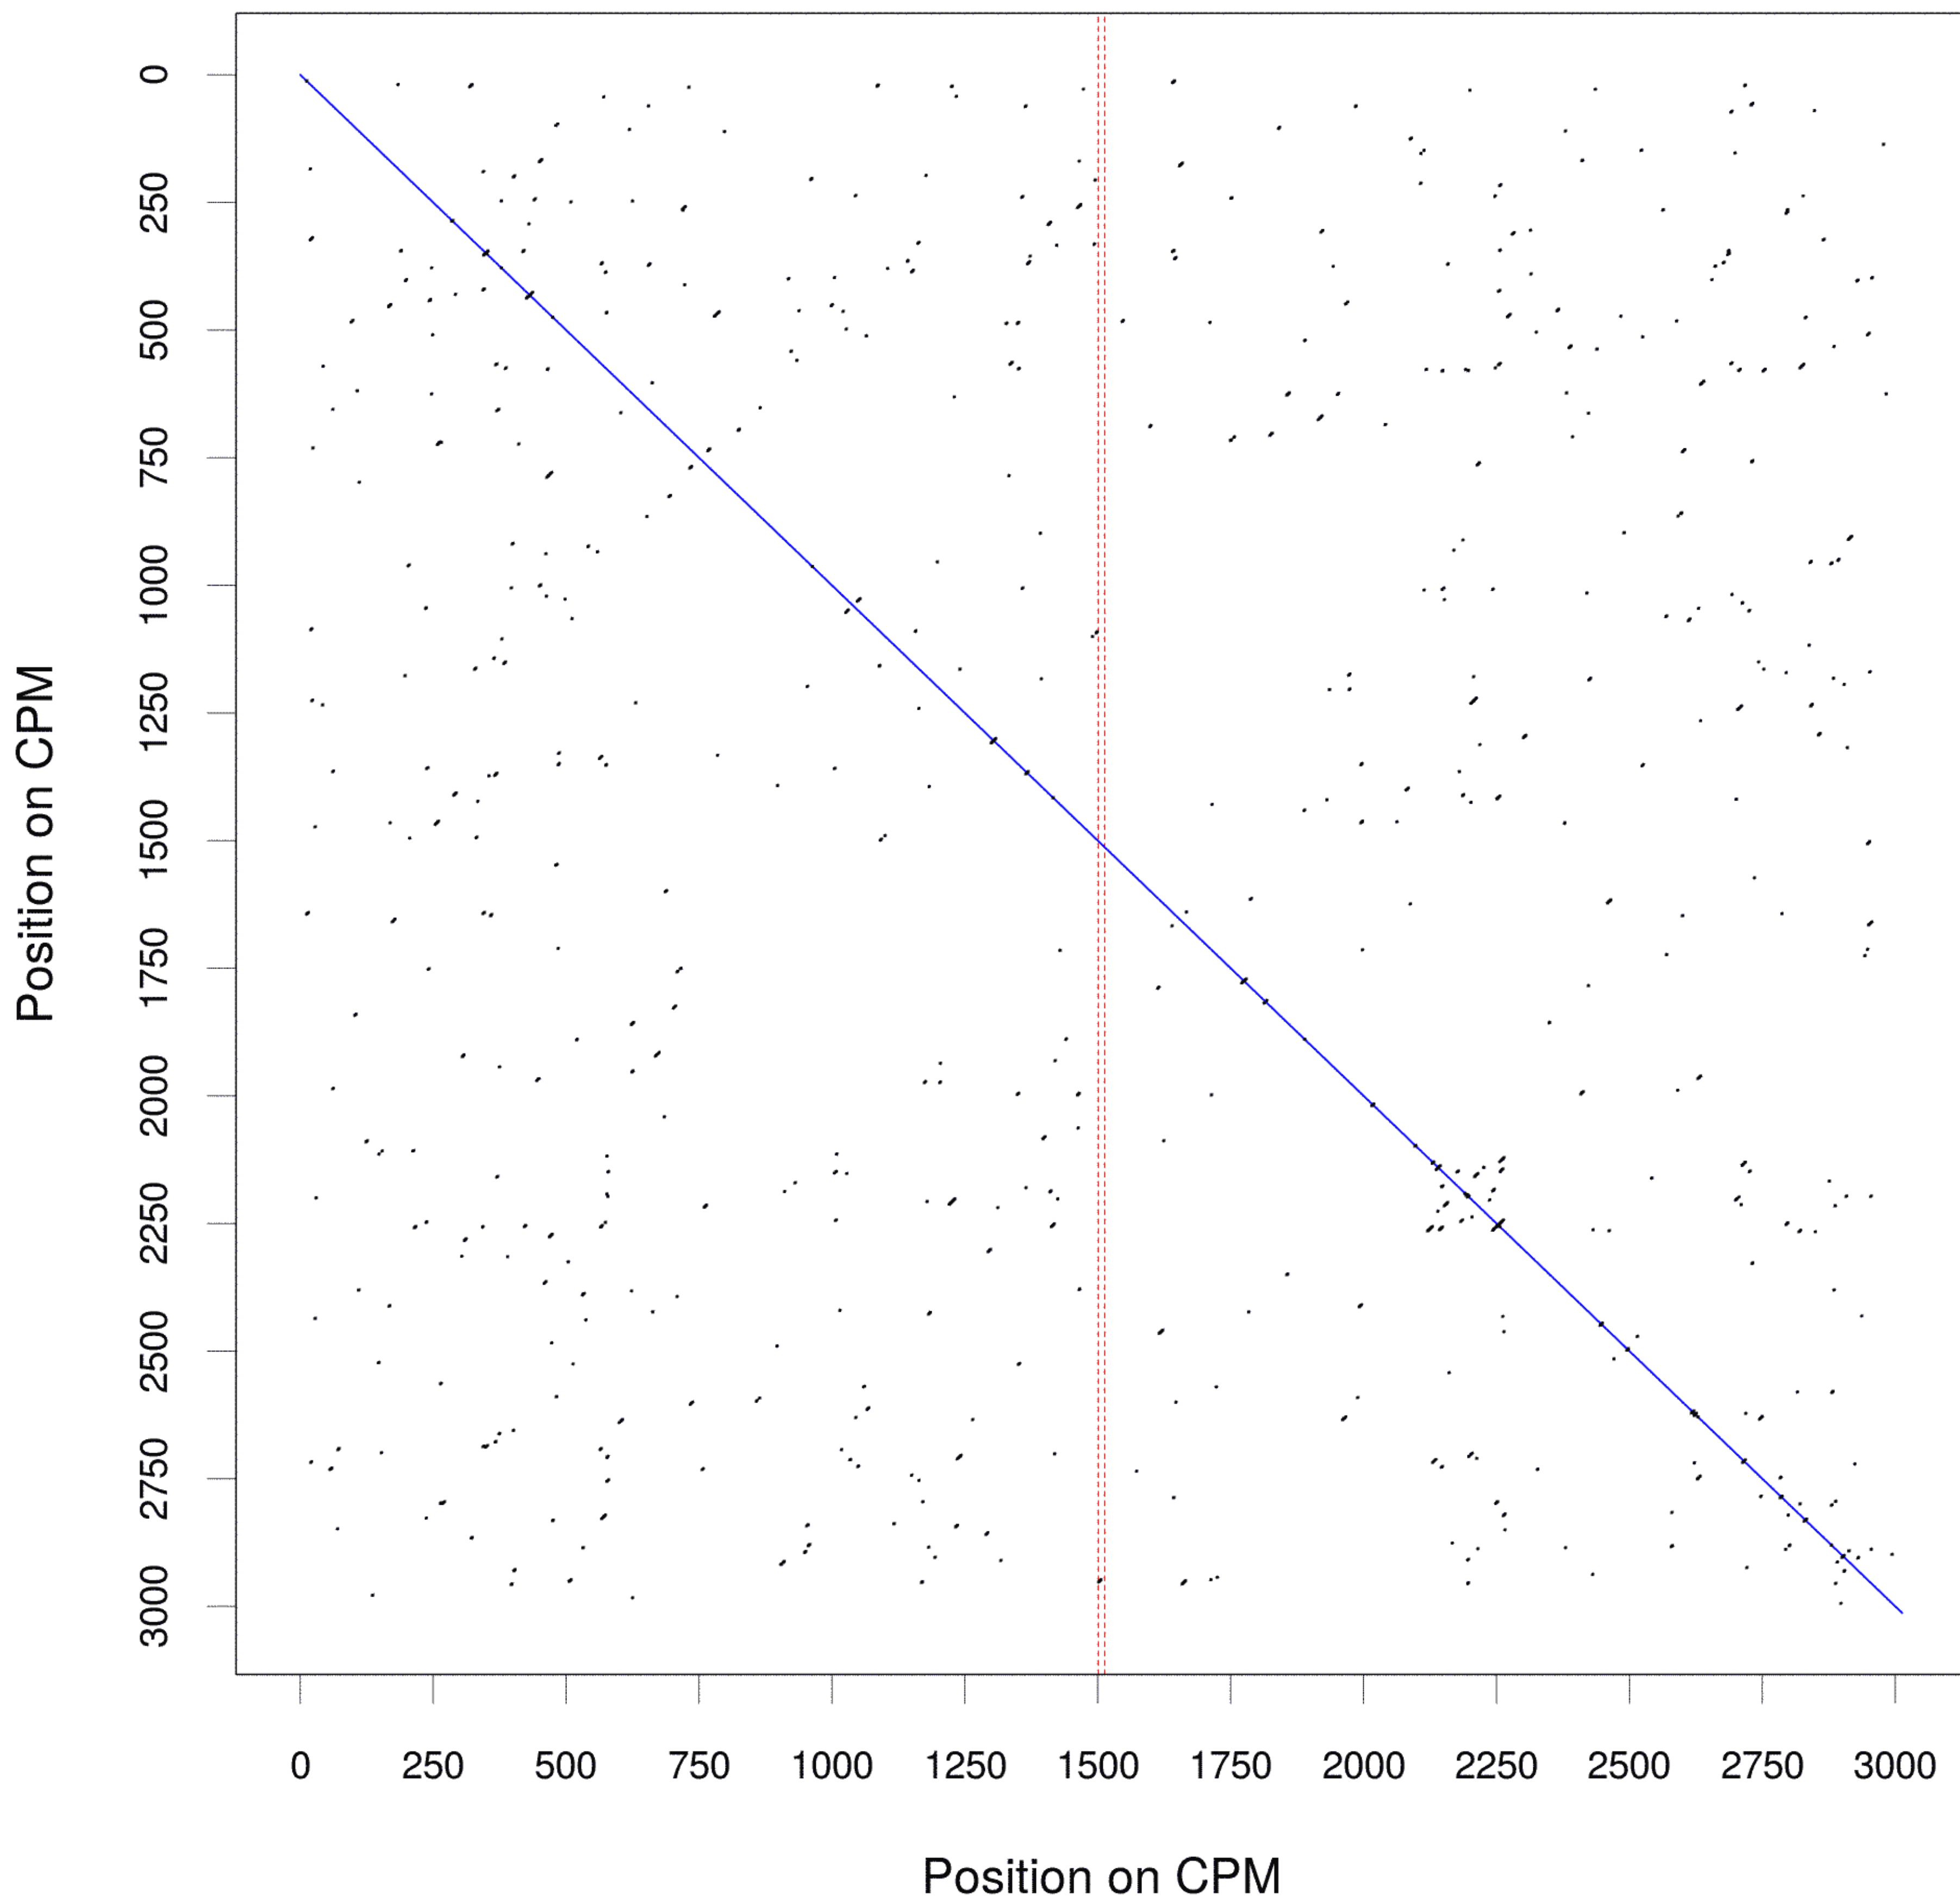



# CROCC

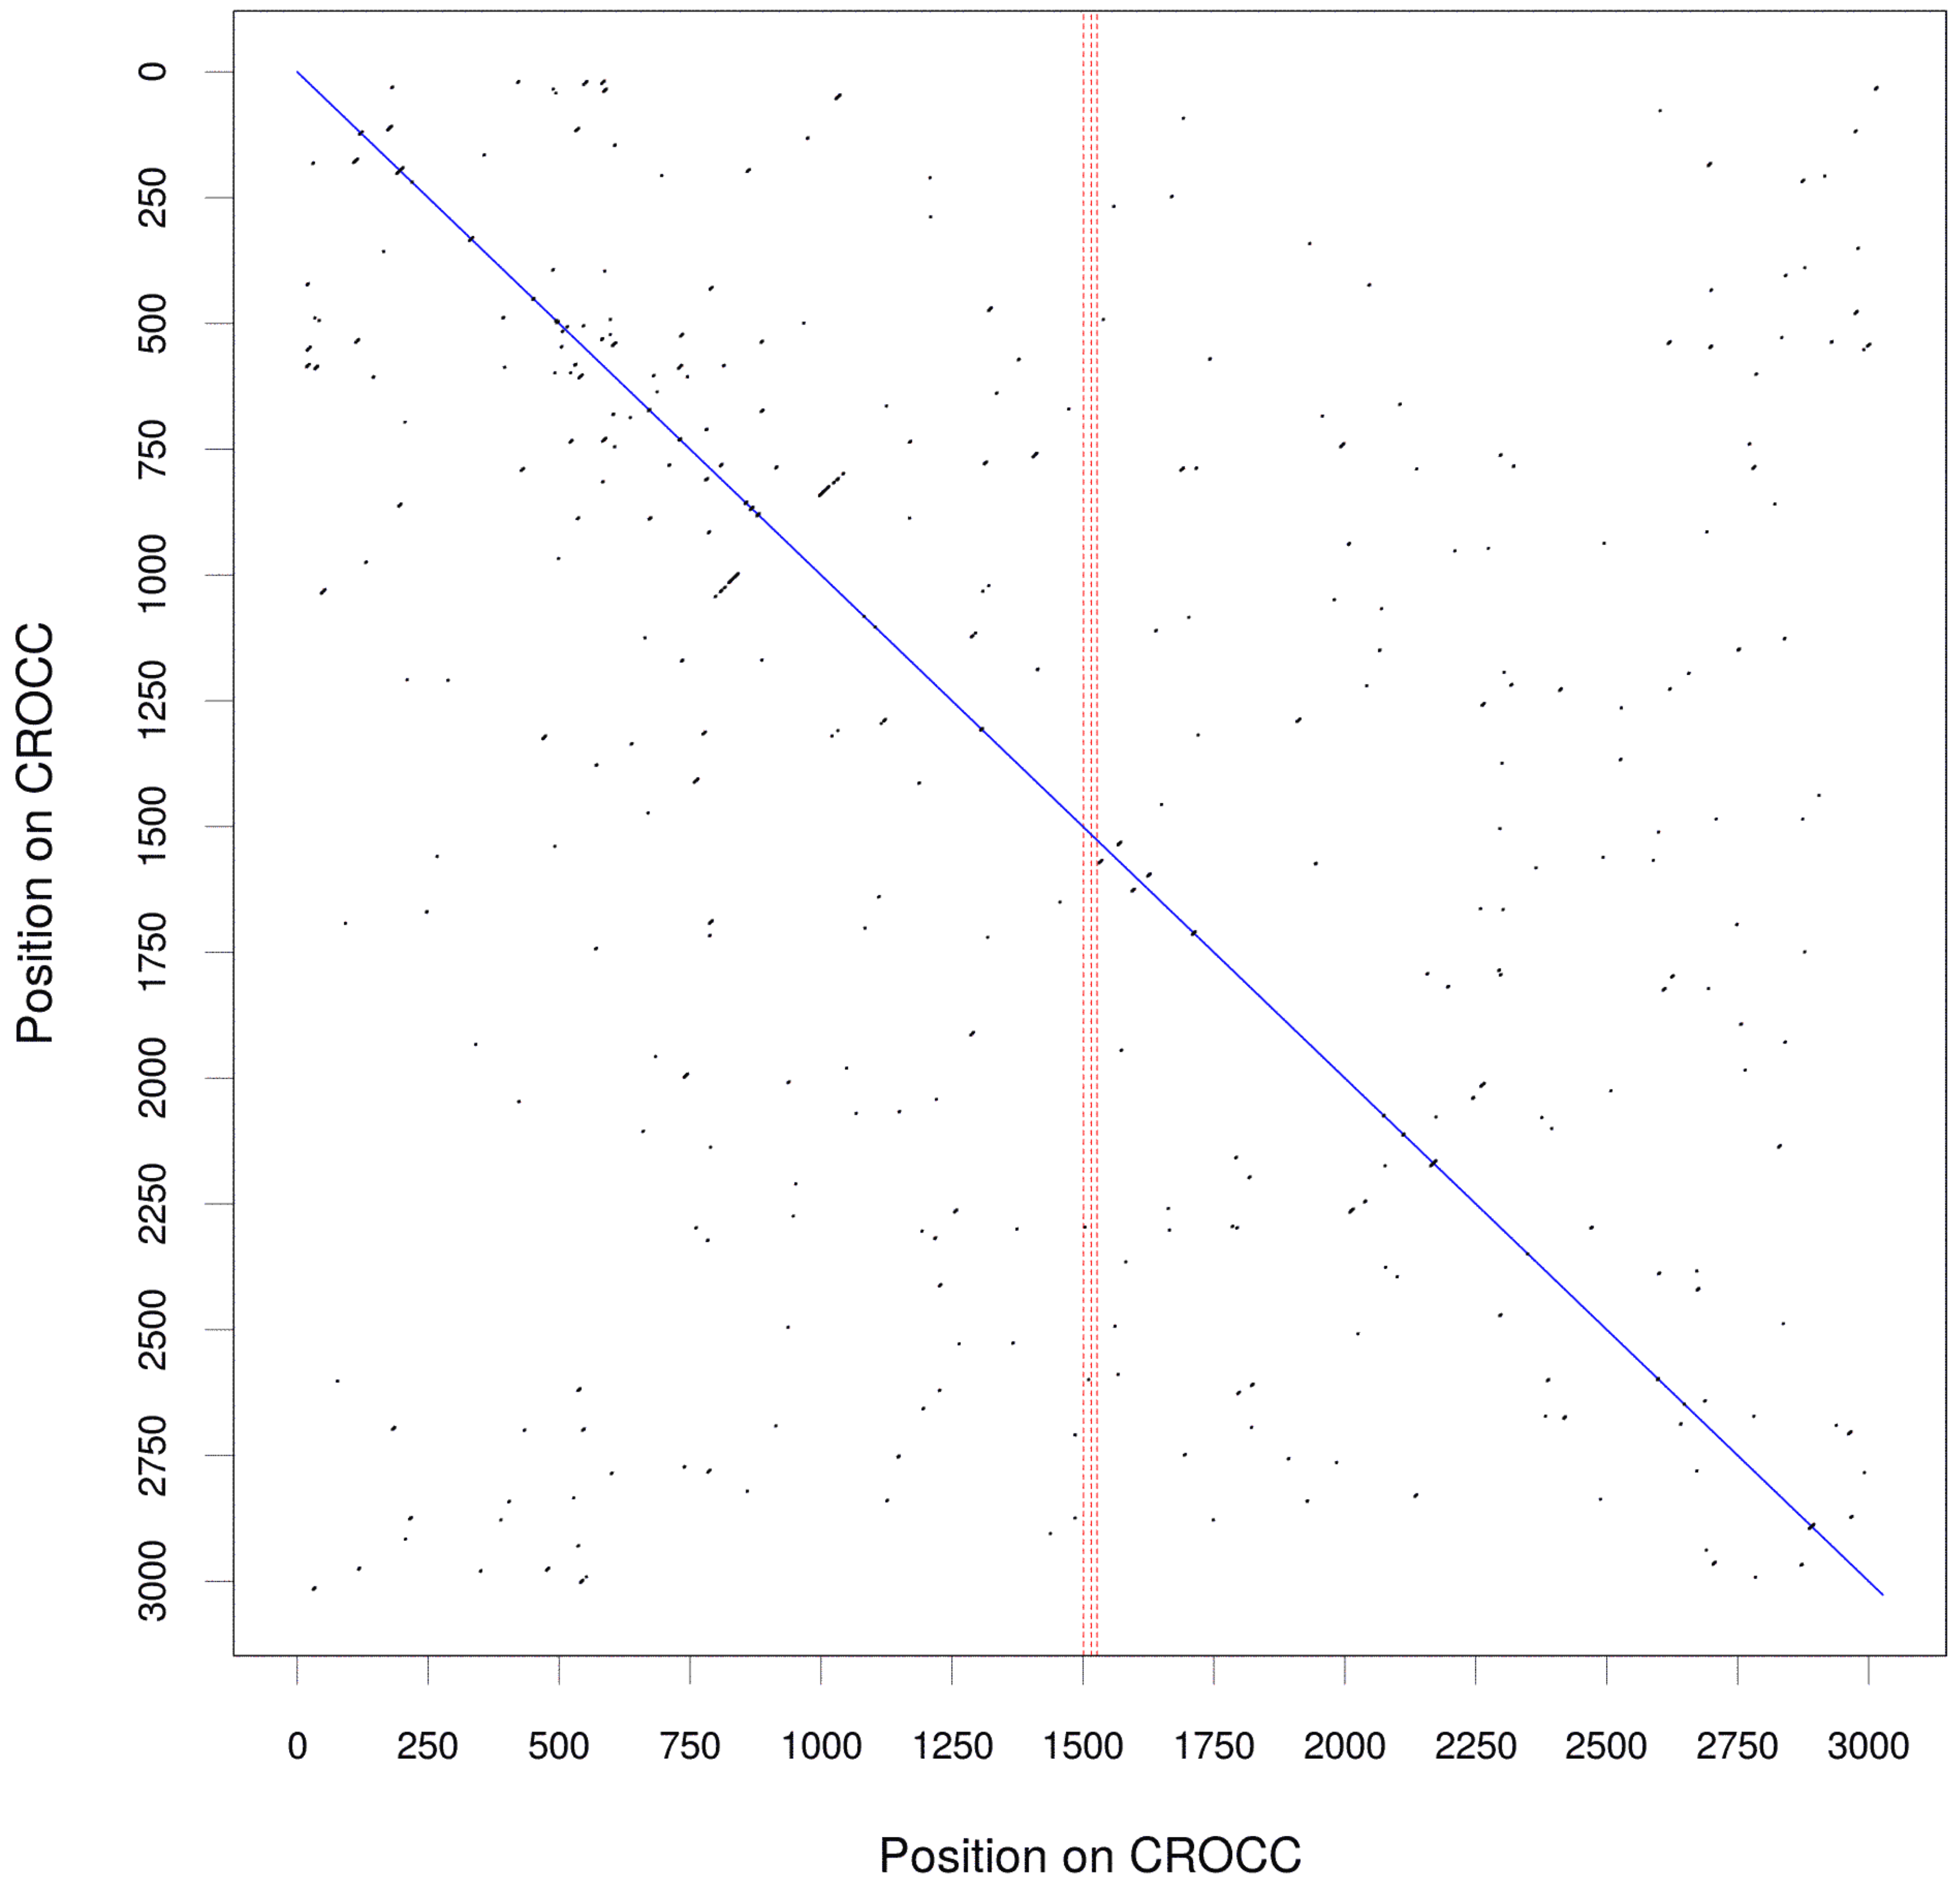

# CRYZL1

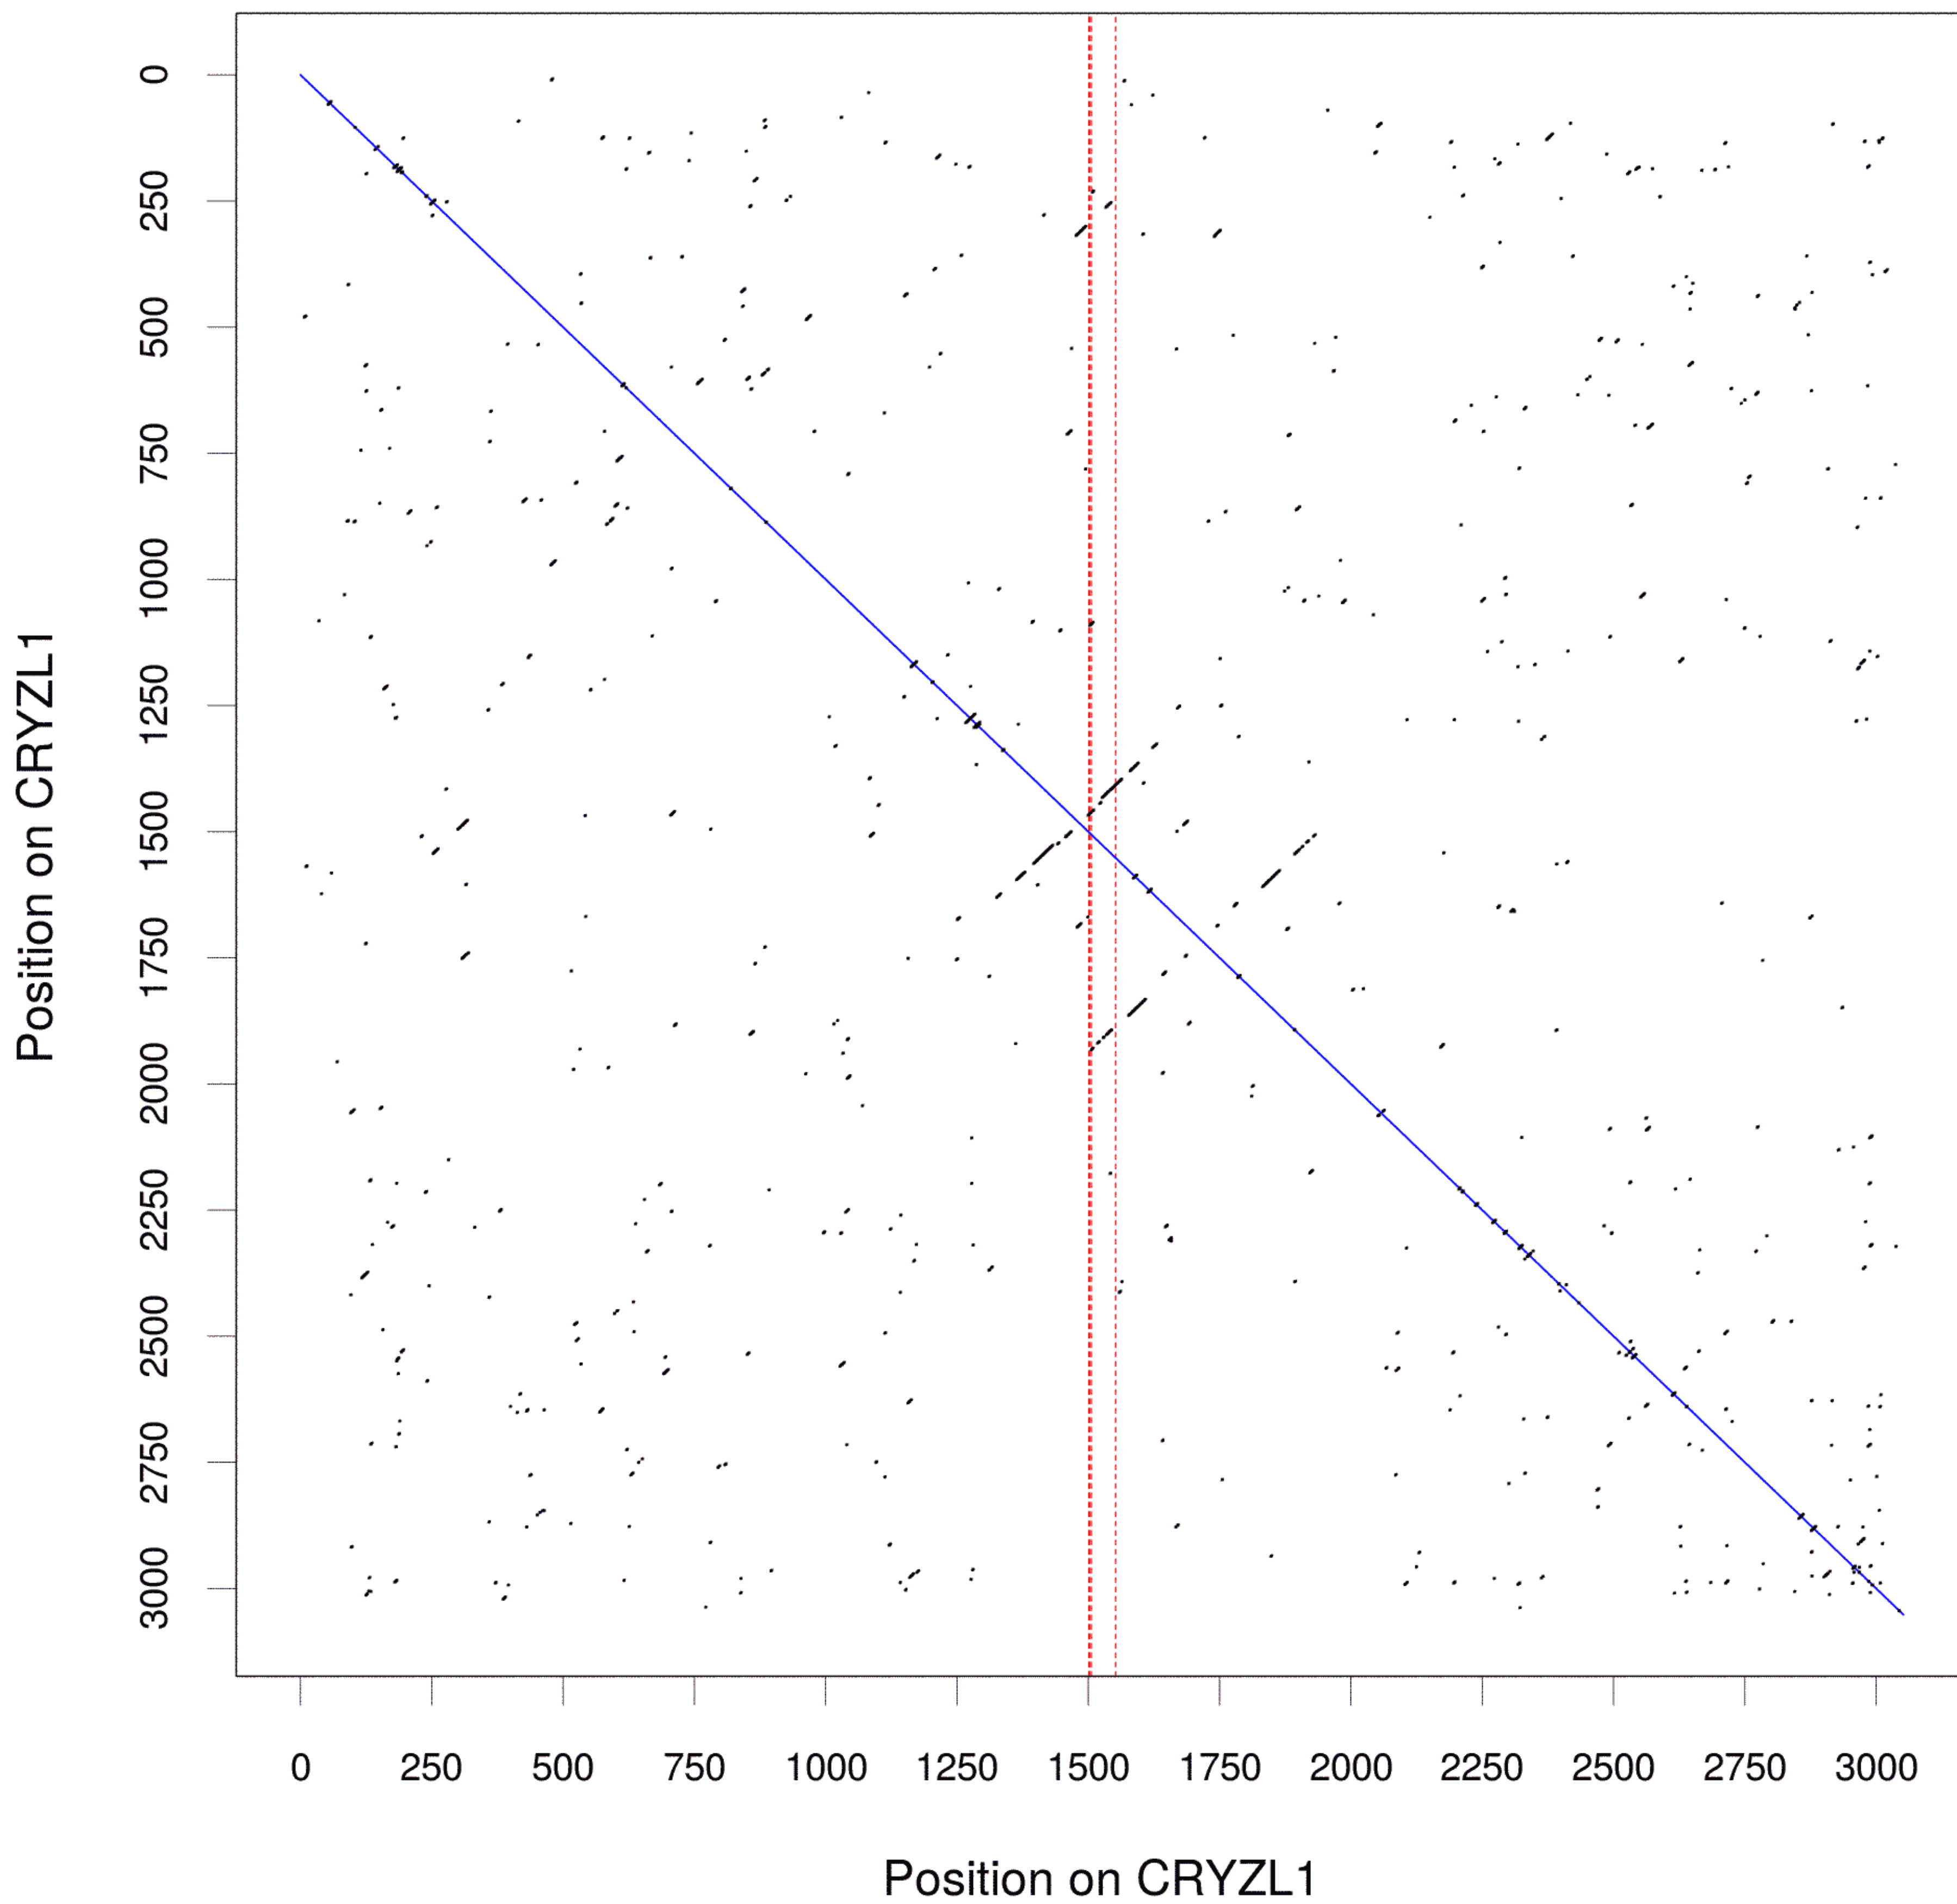

# CSF2RB

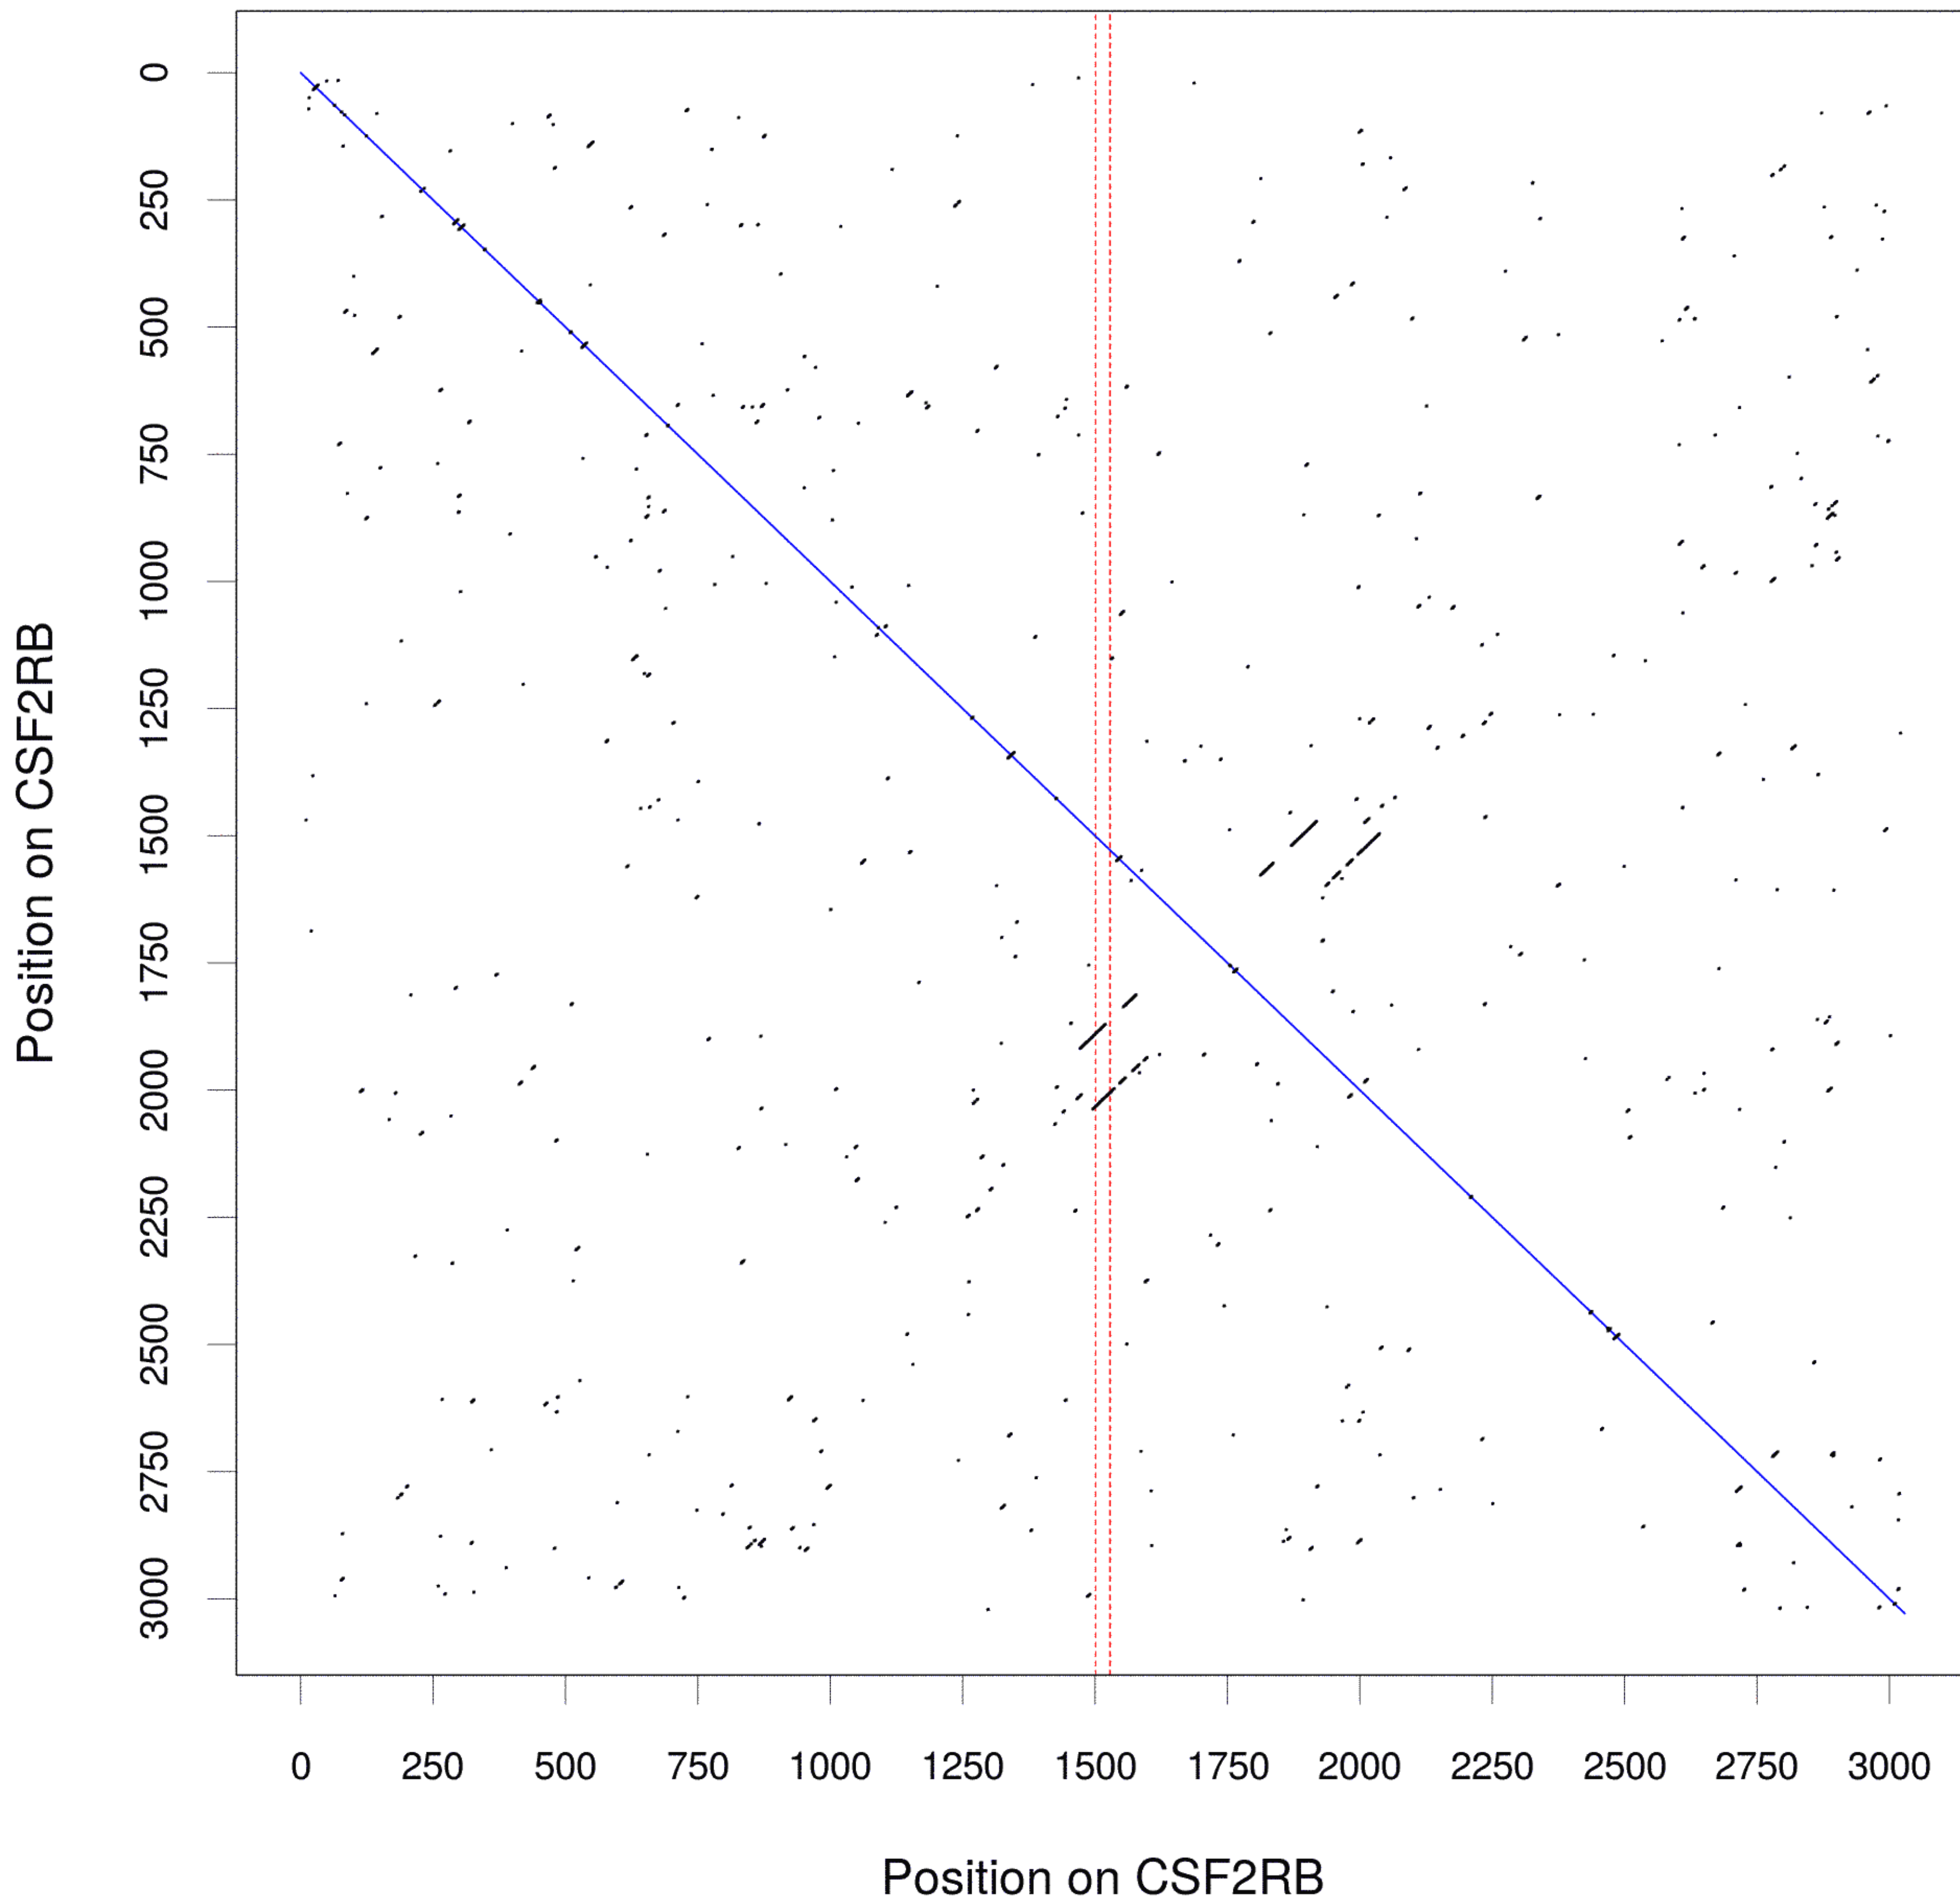

# CSN1S1

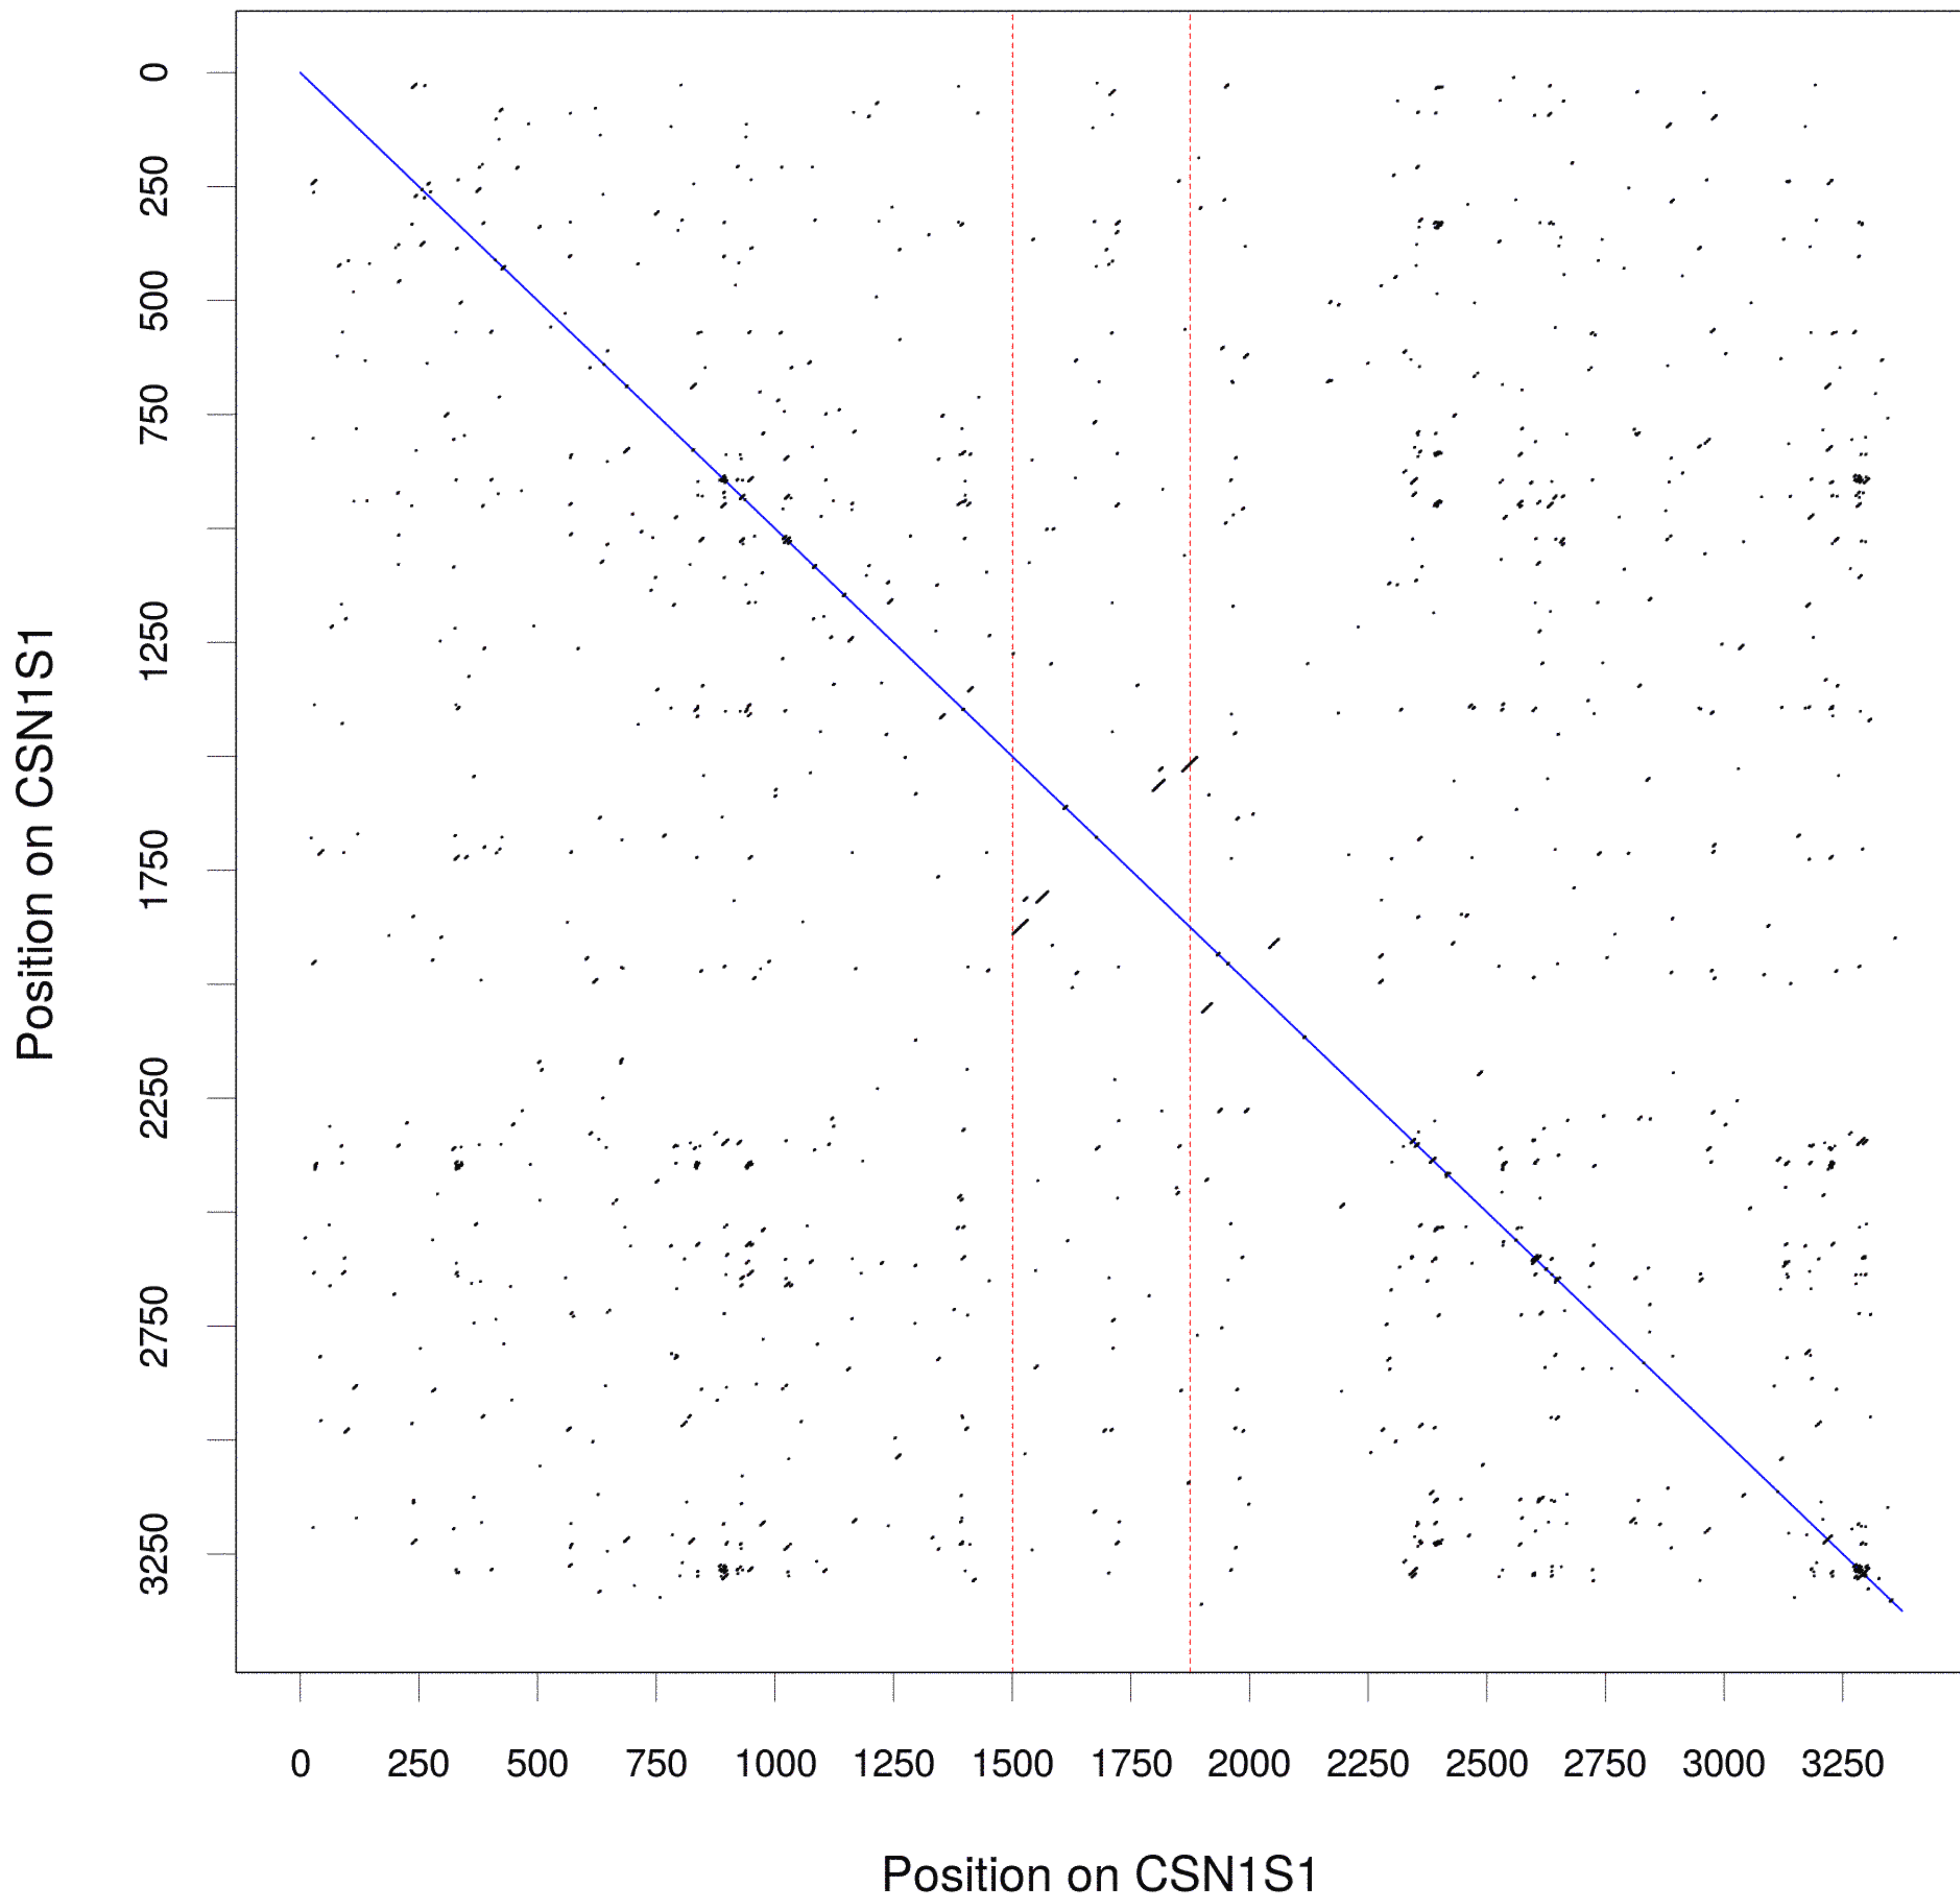

# CSN2

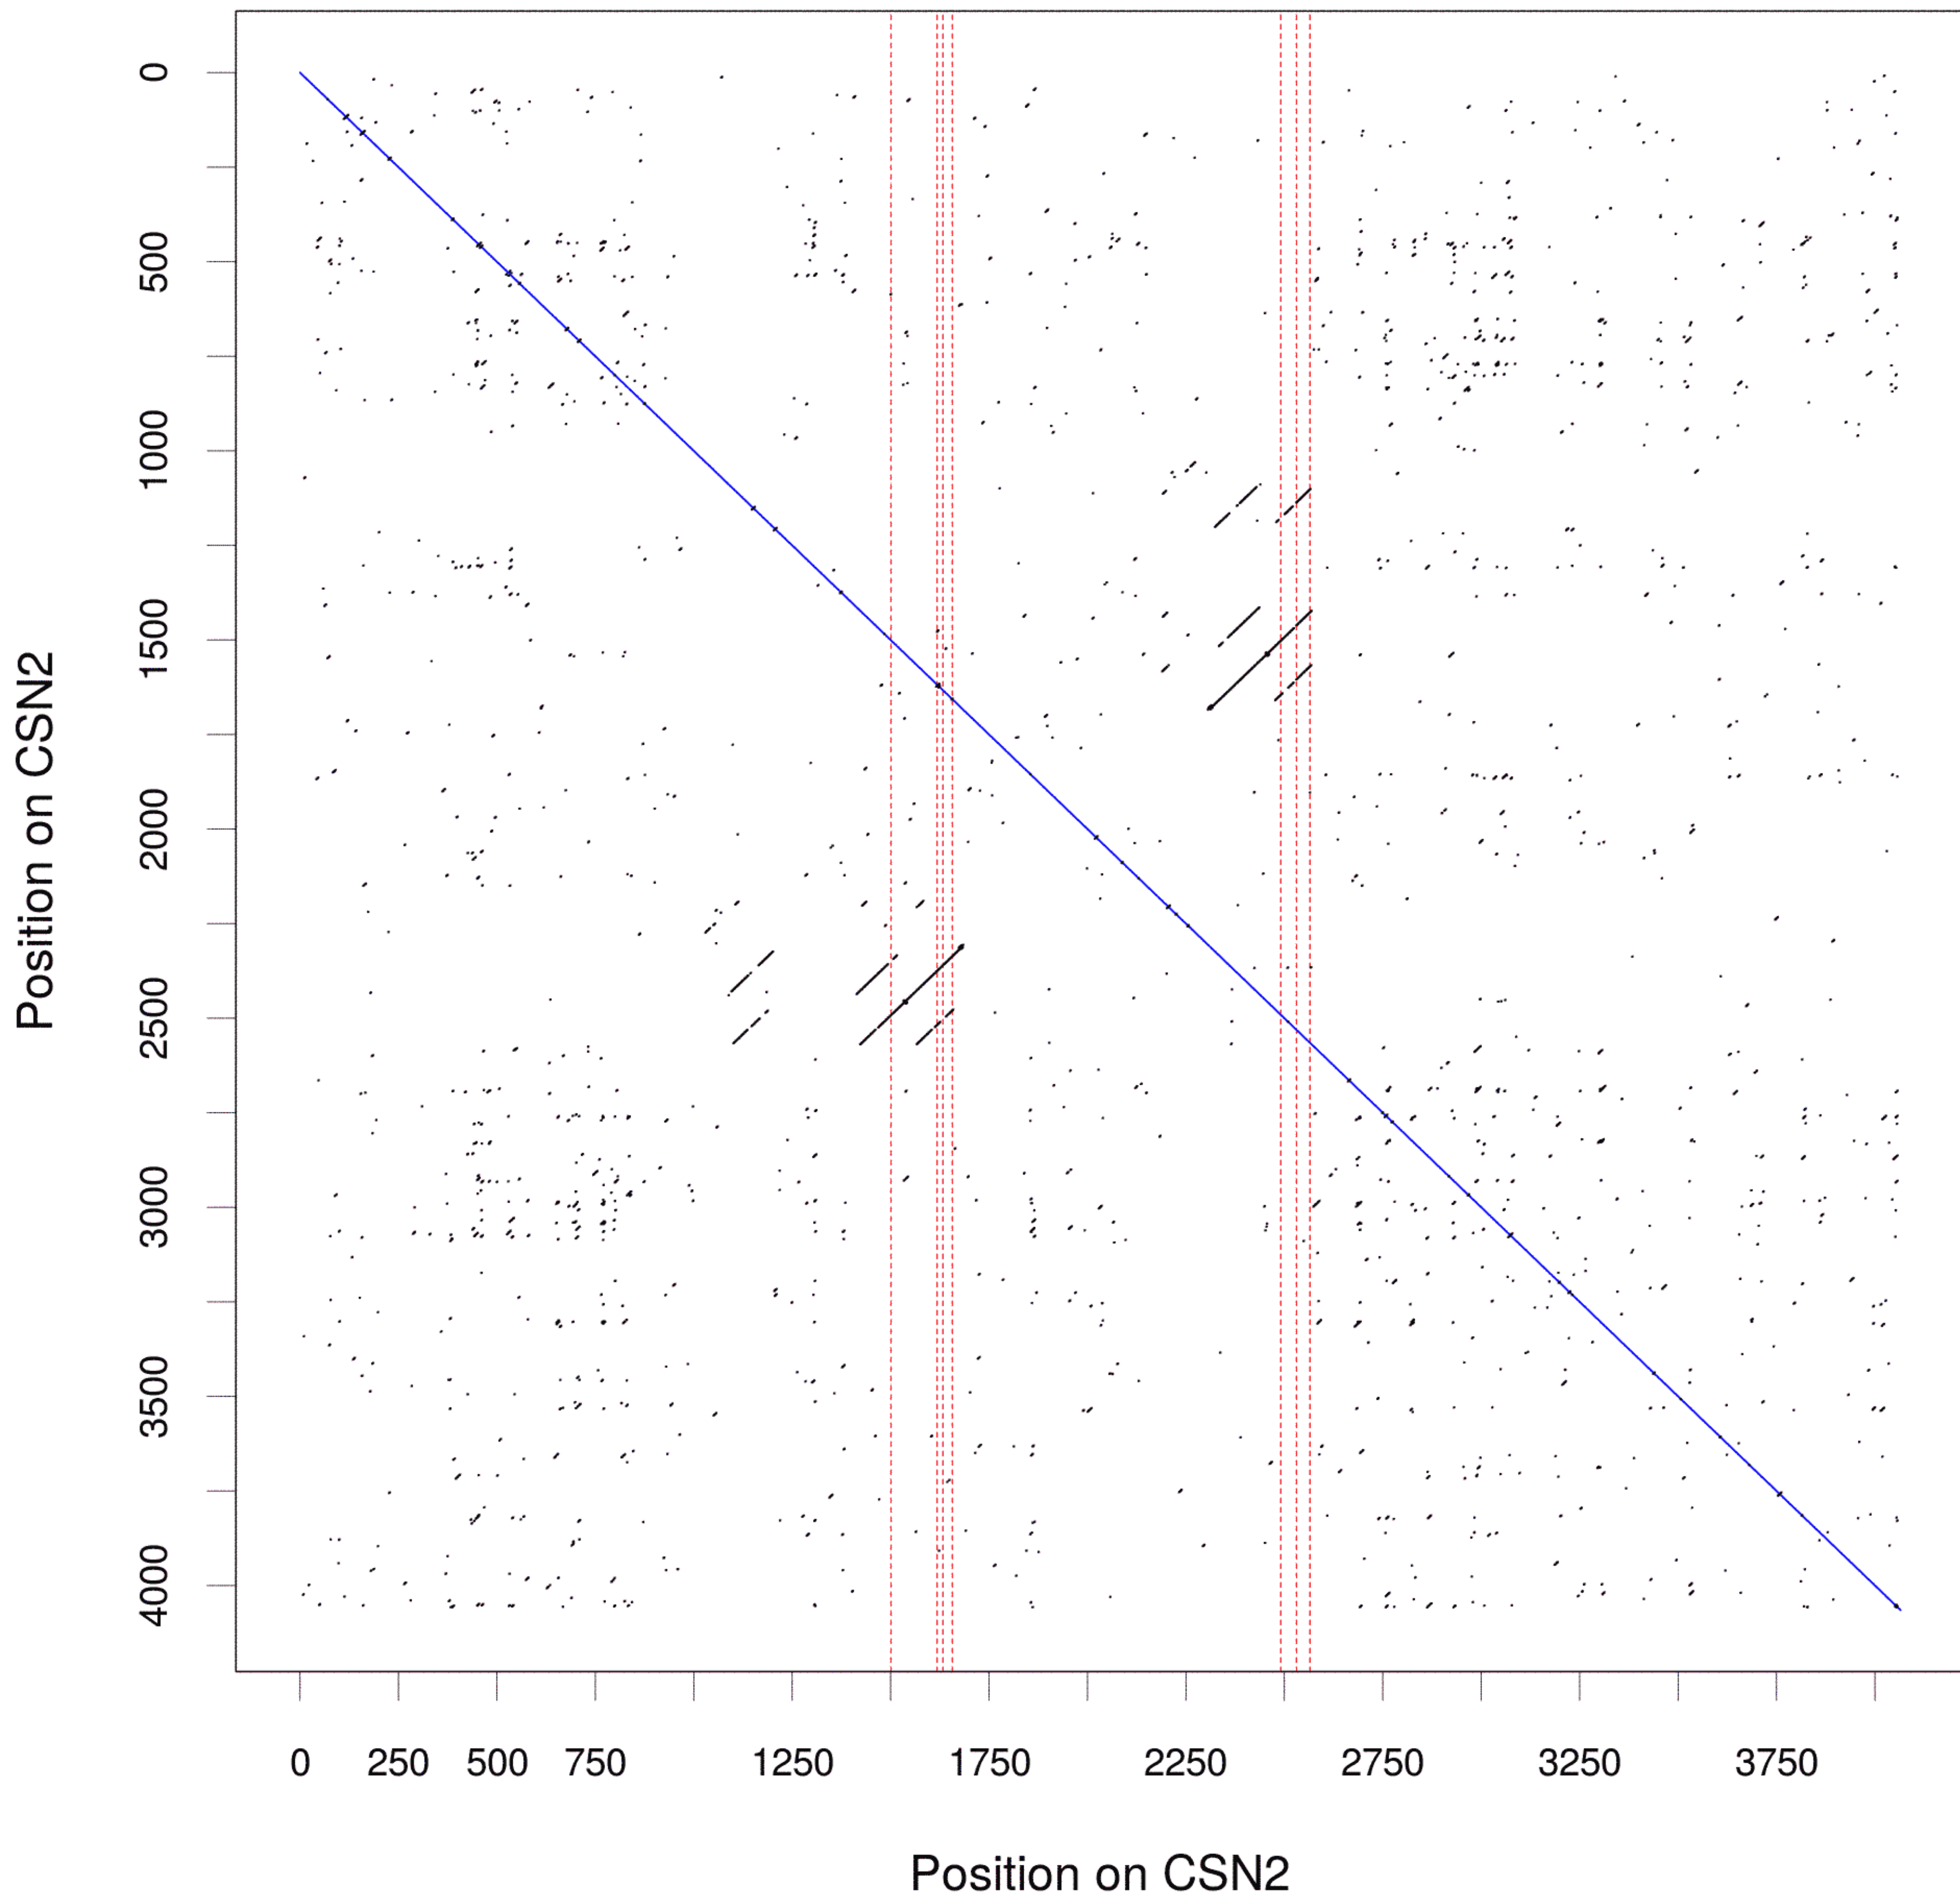

# CSN3

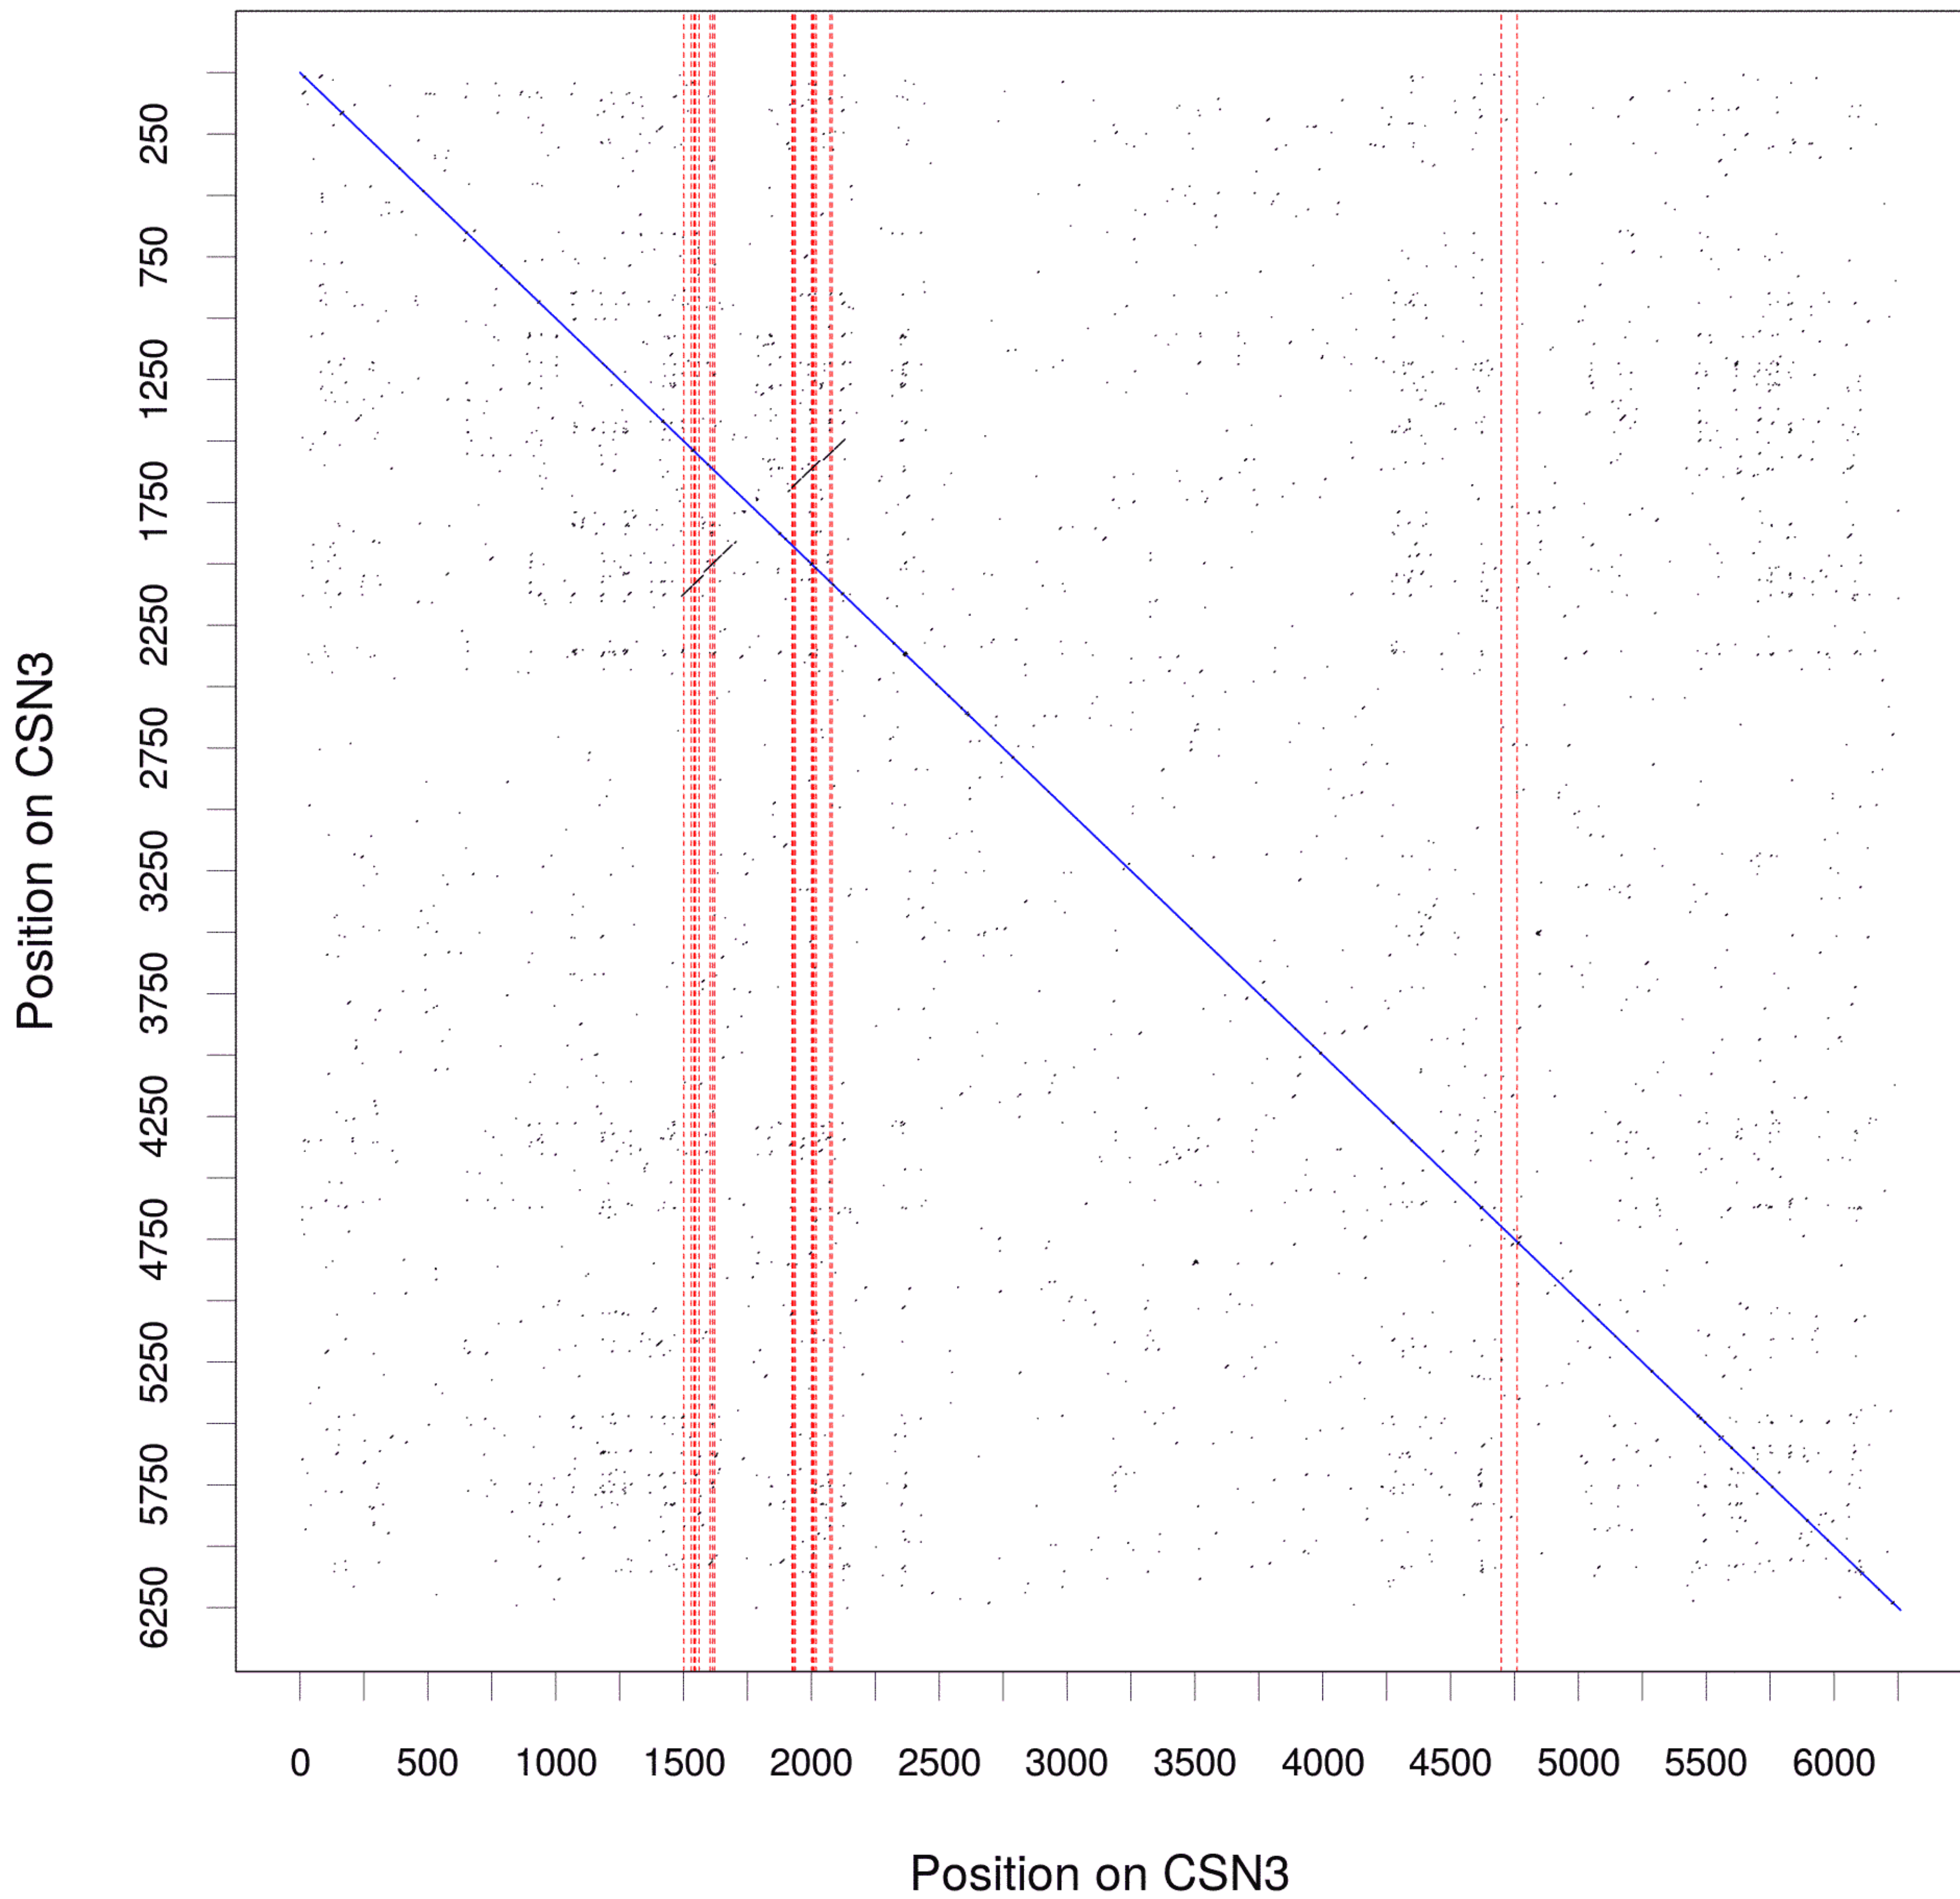

# CYP2U1

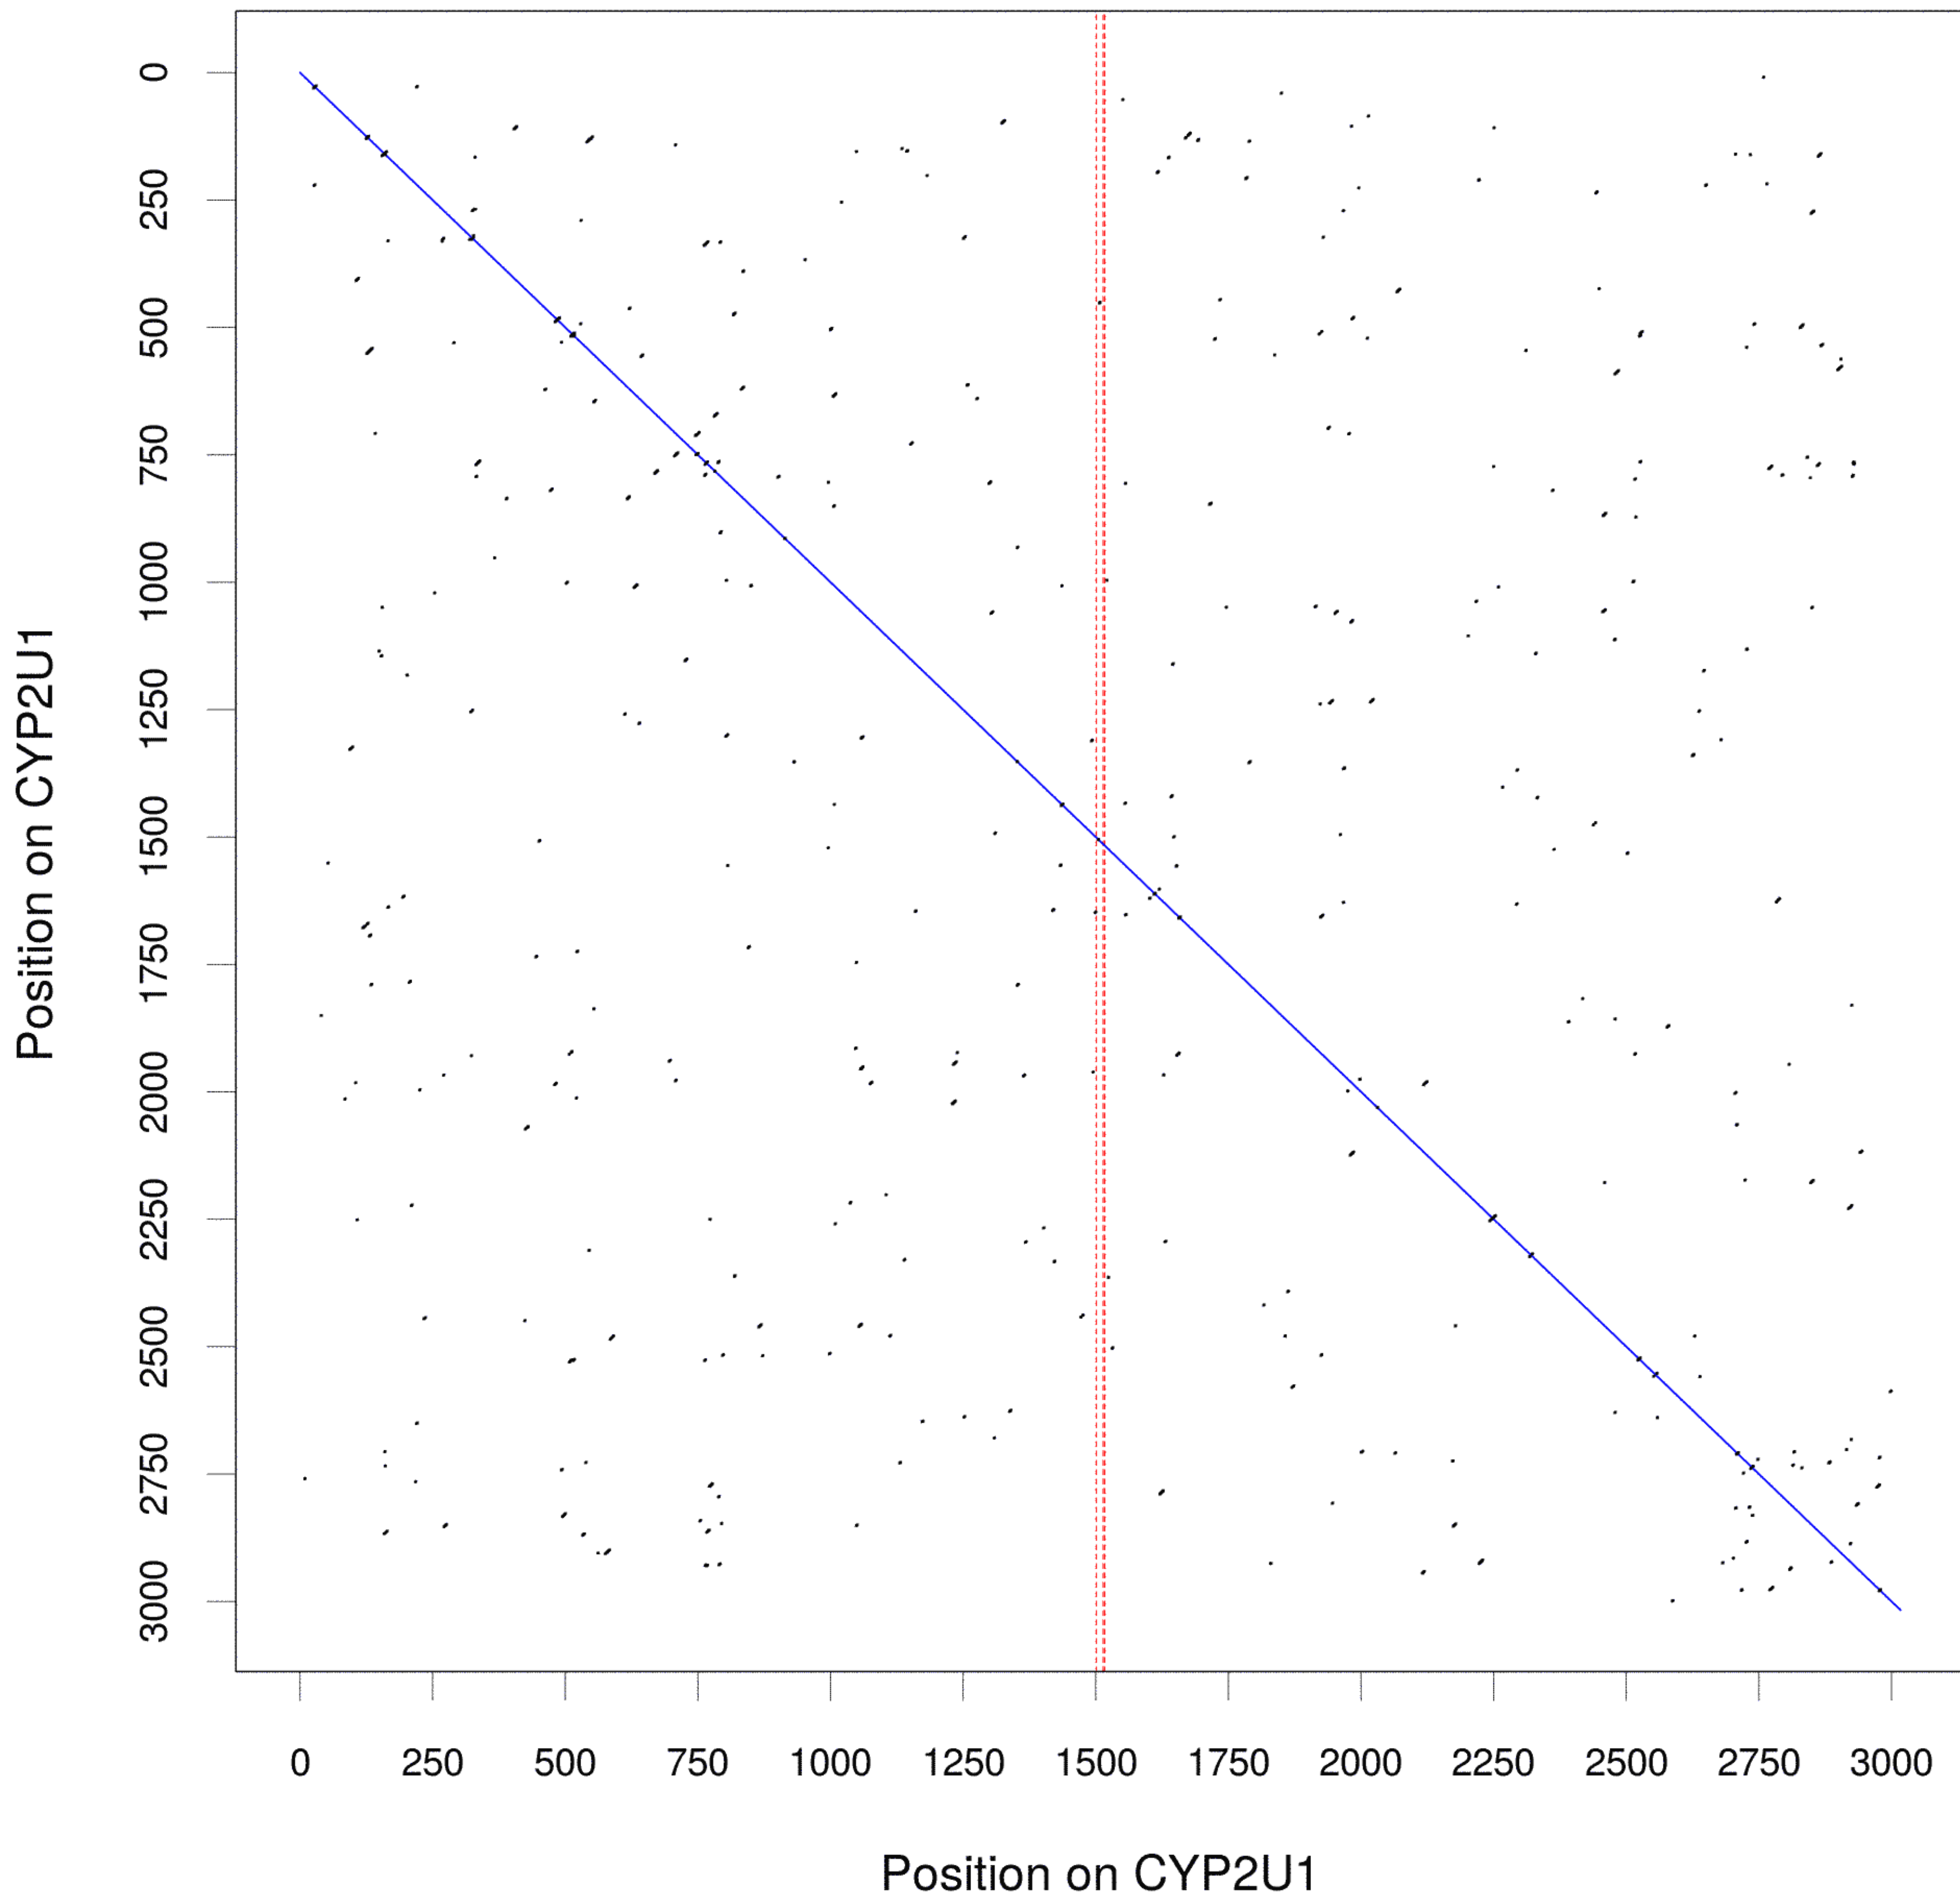

# CYP11A1

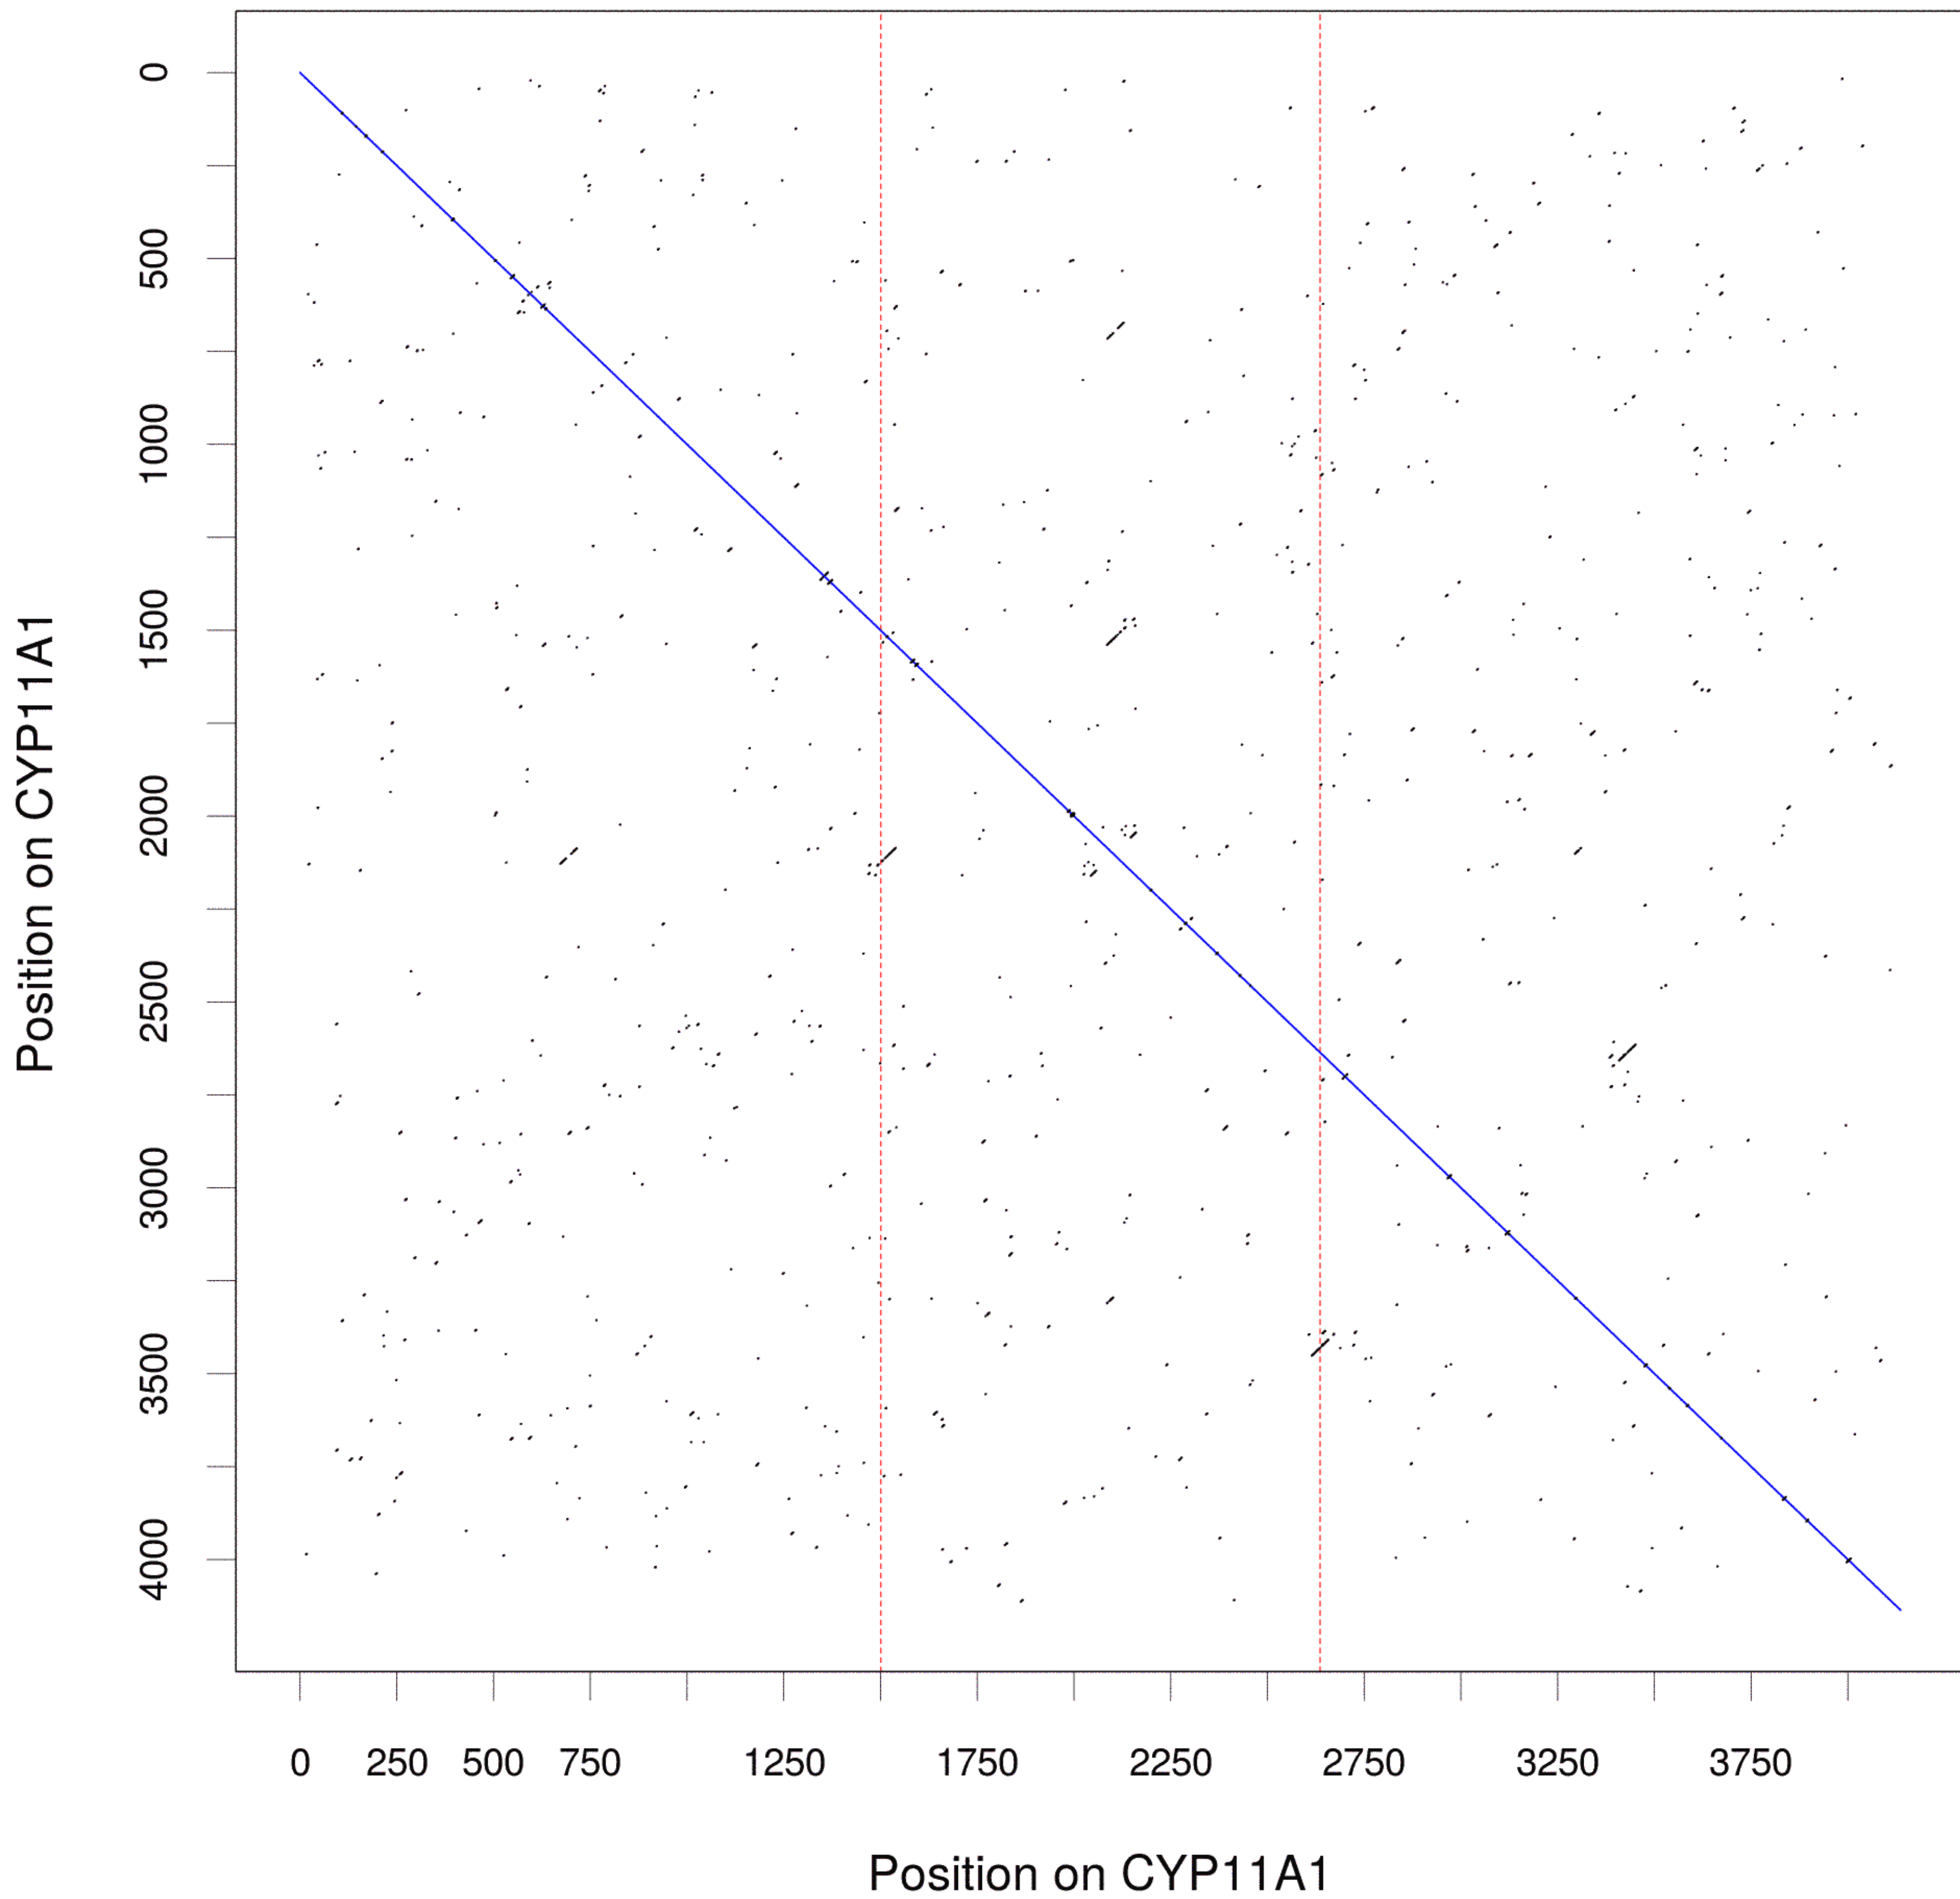



# DCP2

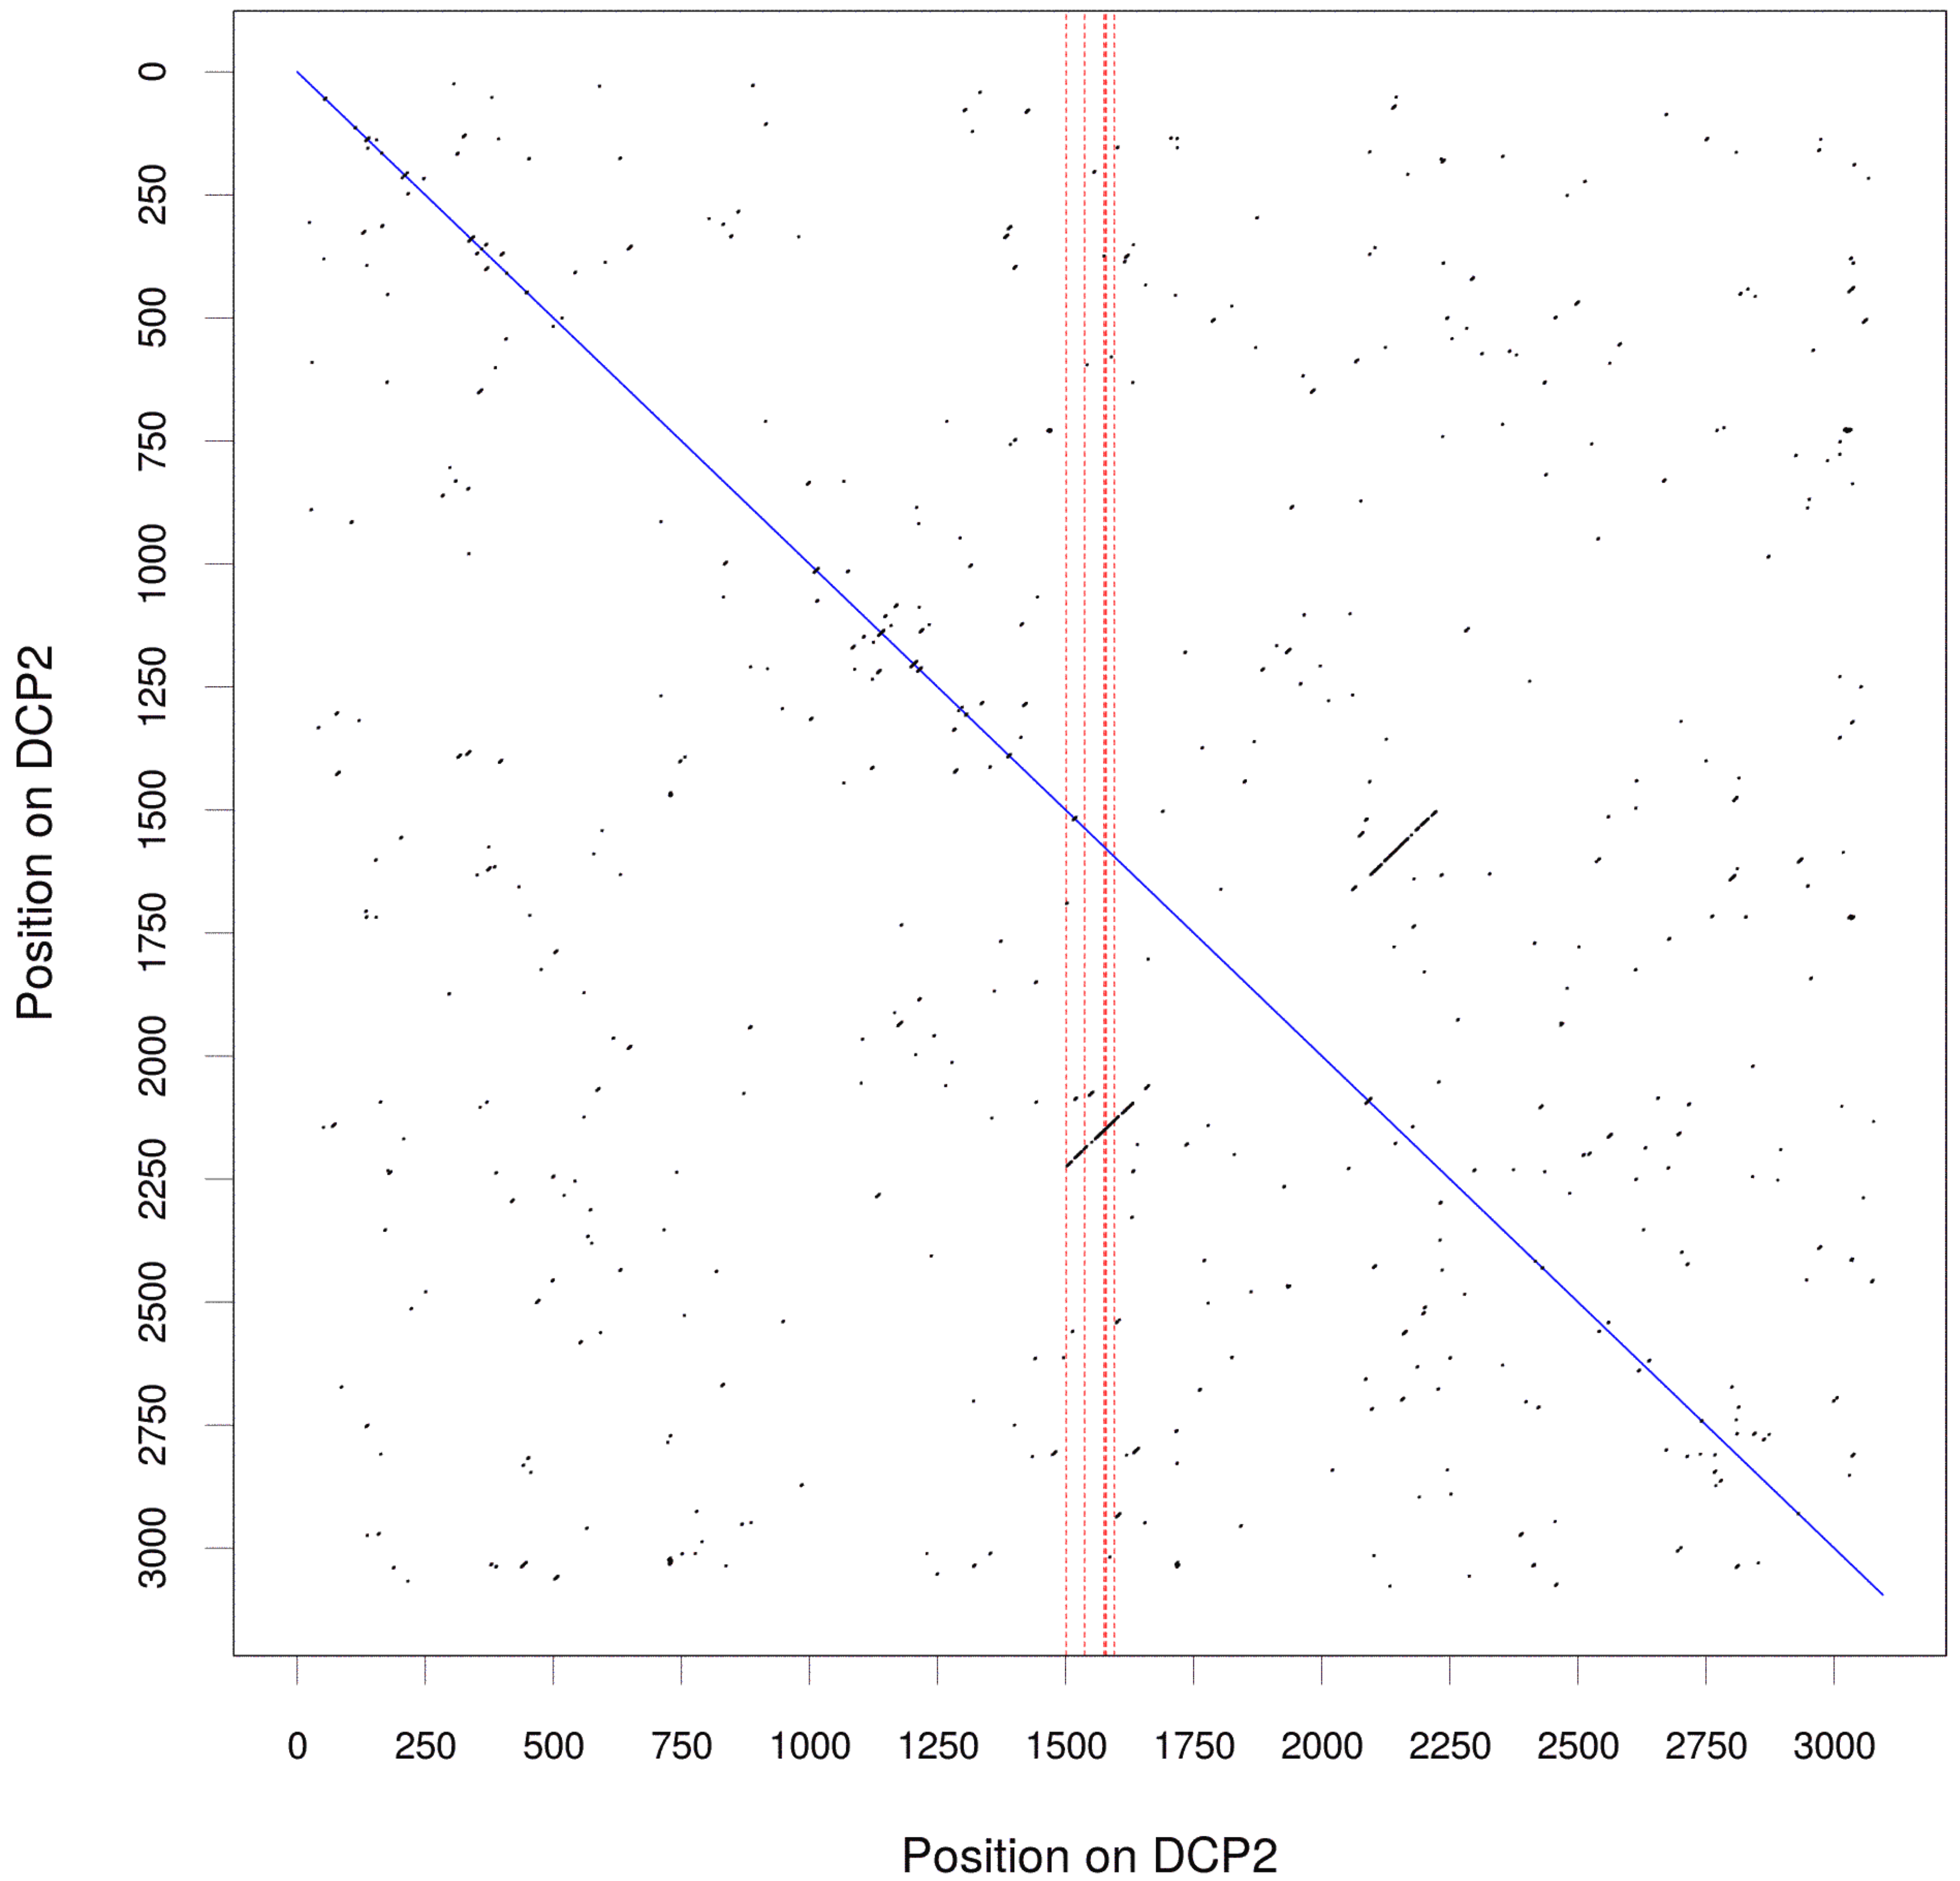

# DDX31

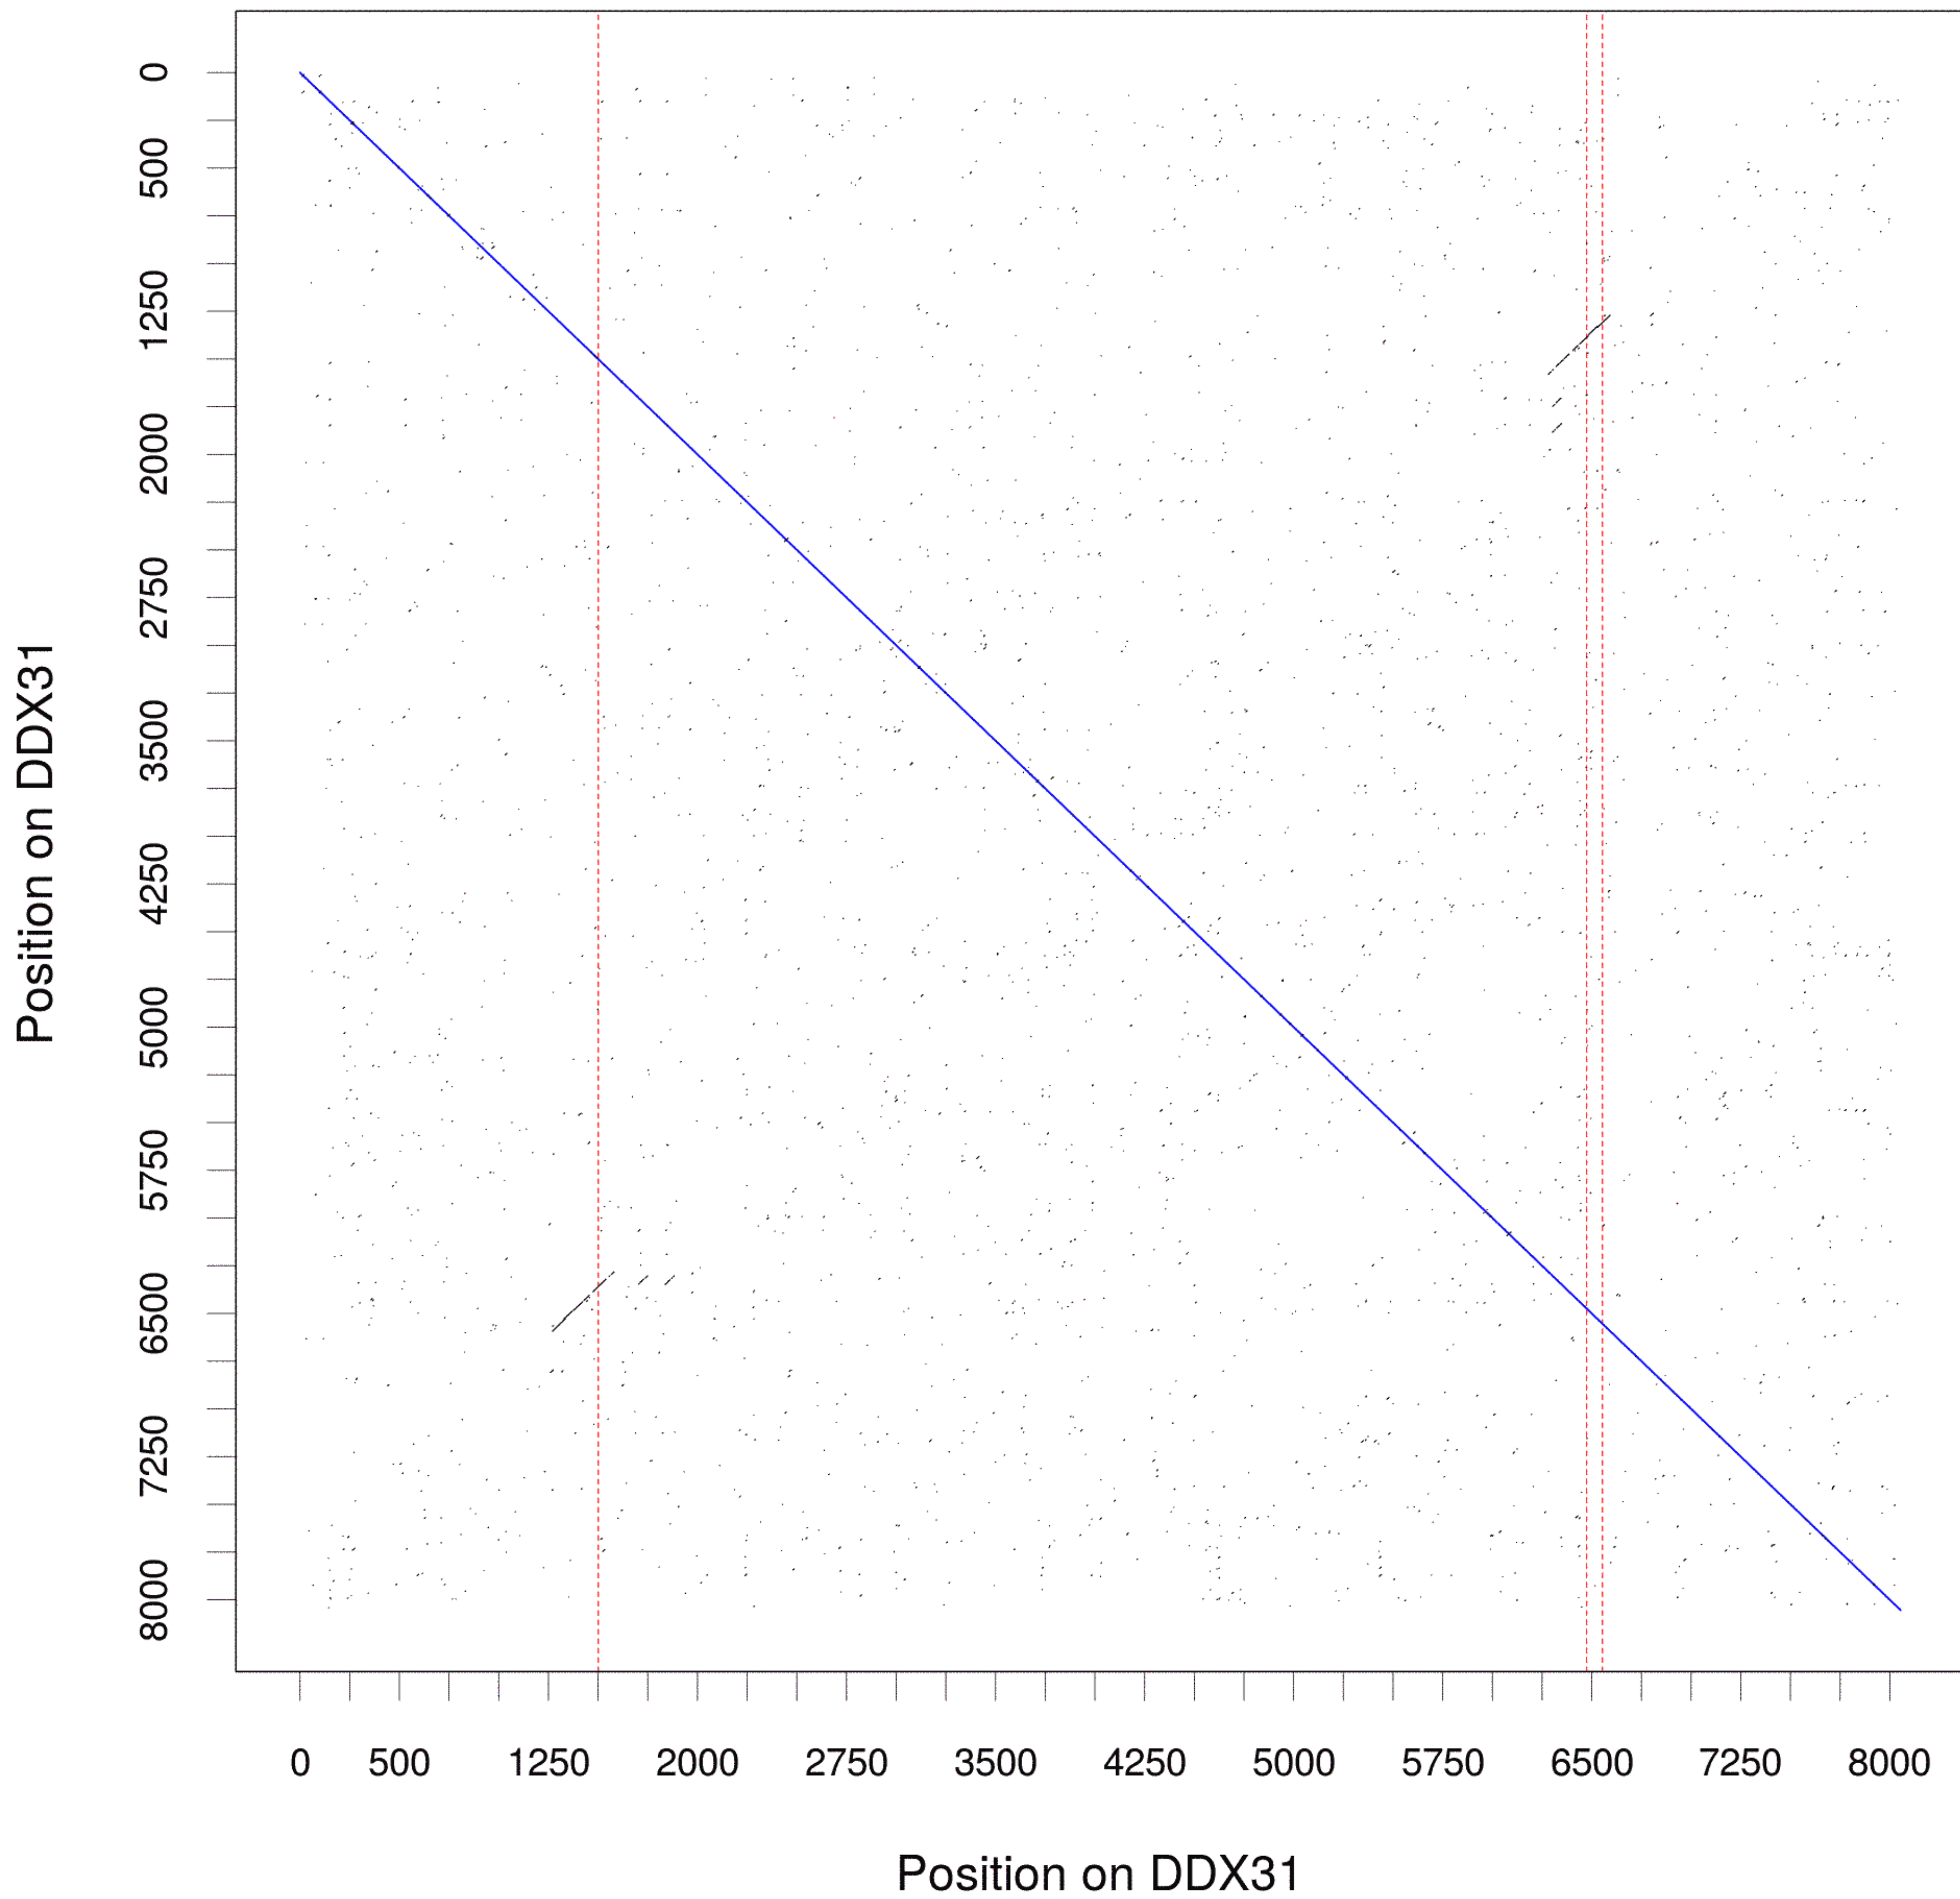

# DIABLO

Position on DIABLO

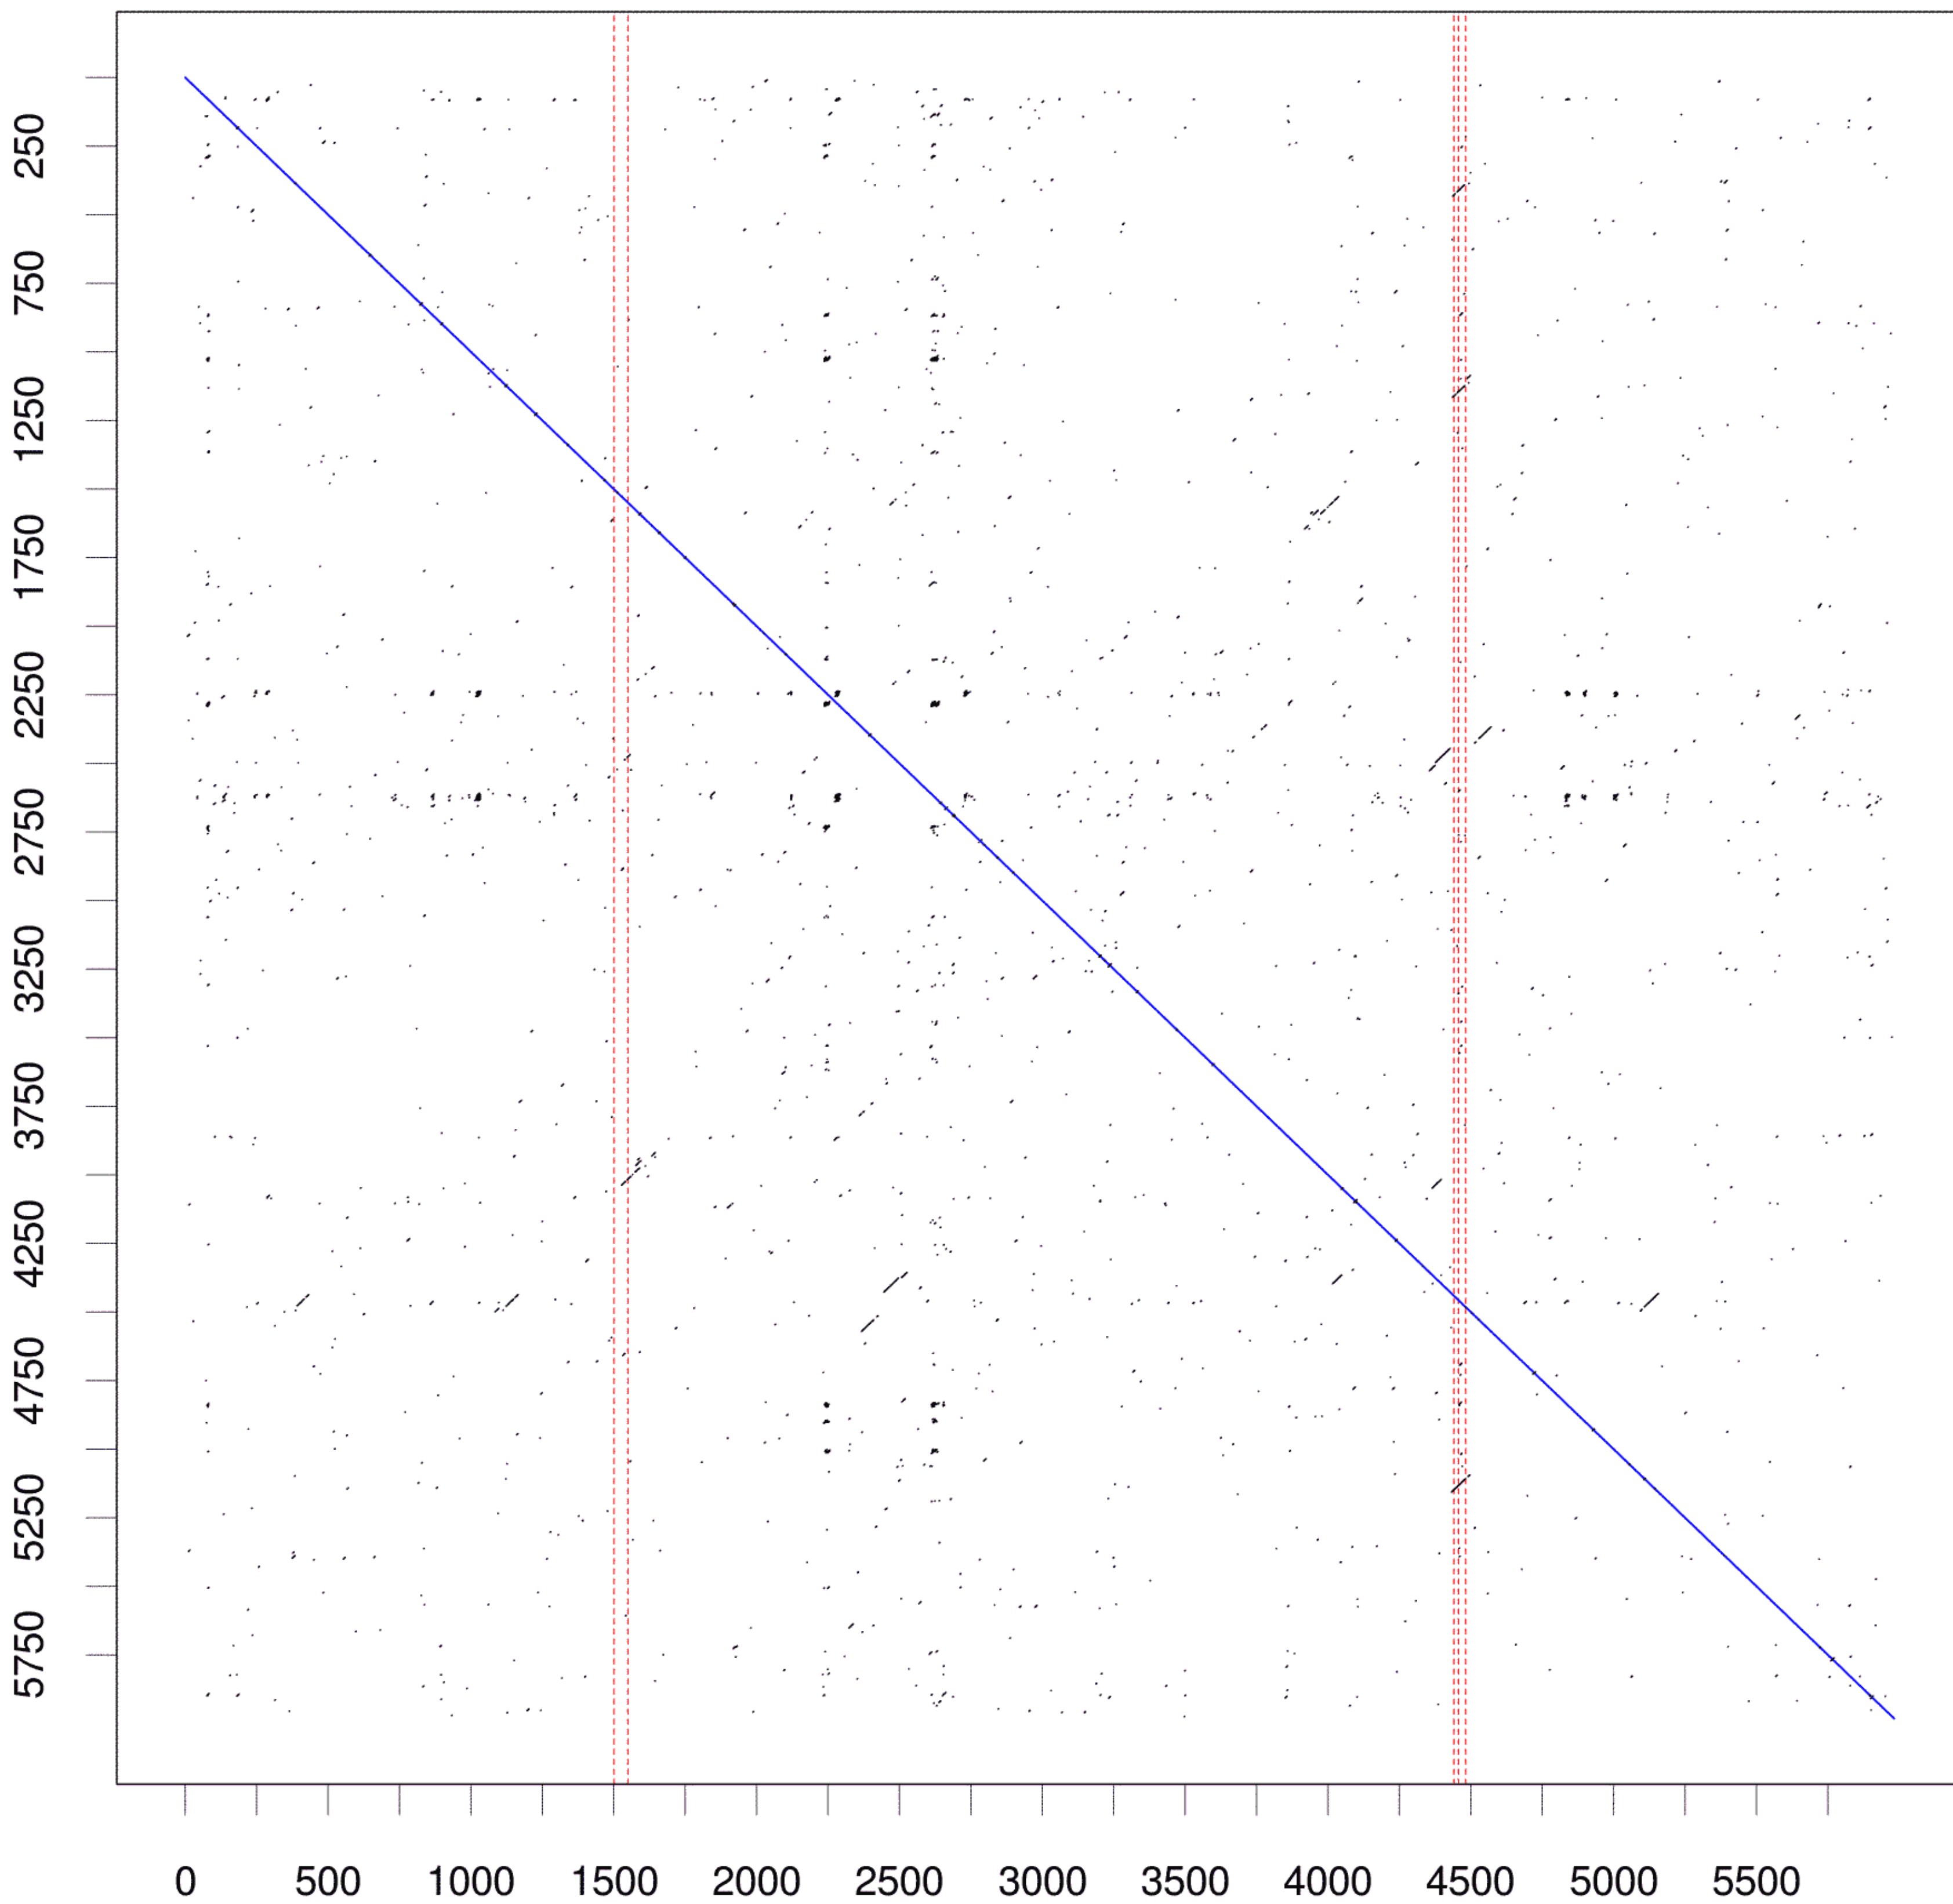

Position on DIABLO

# DNM2

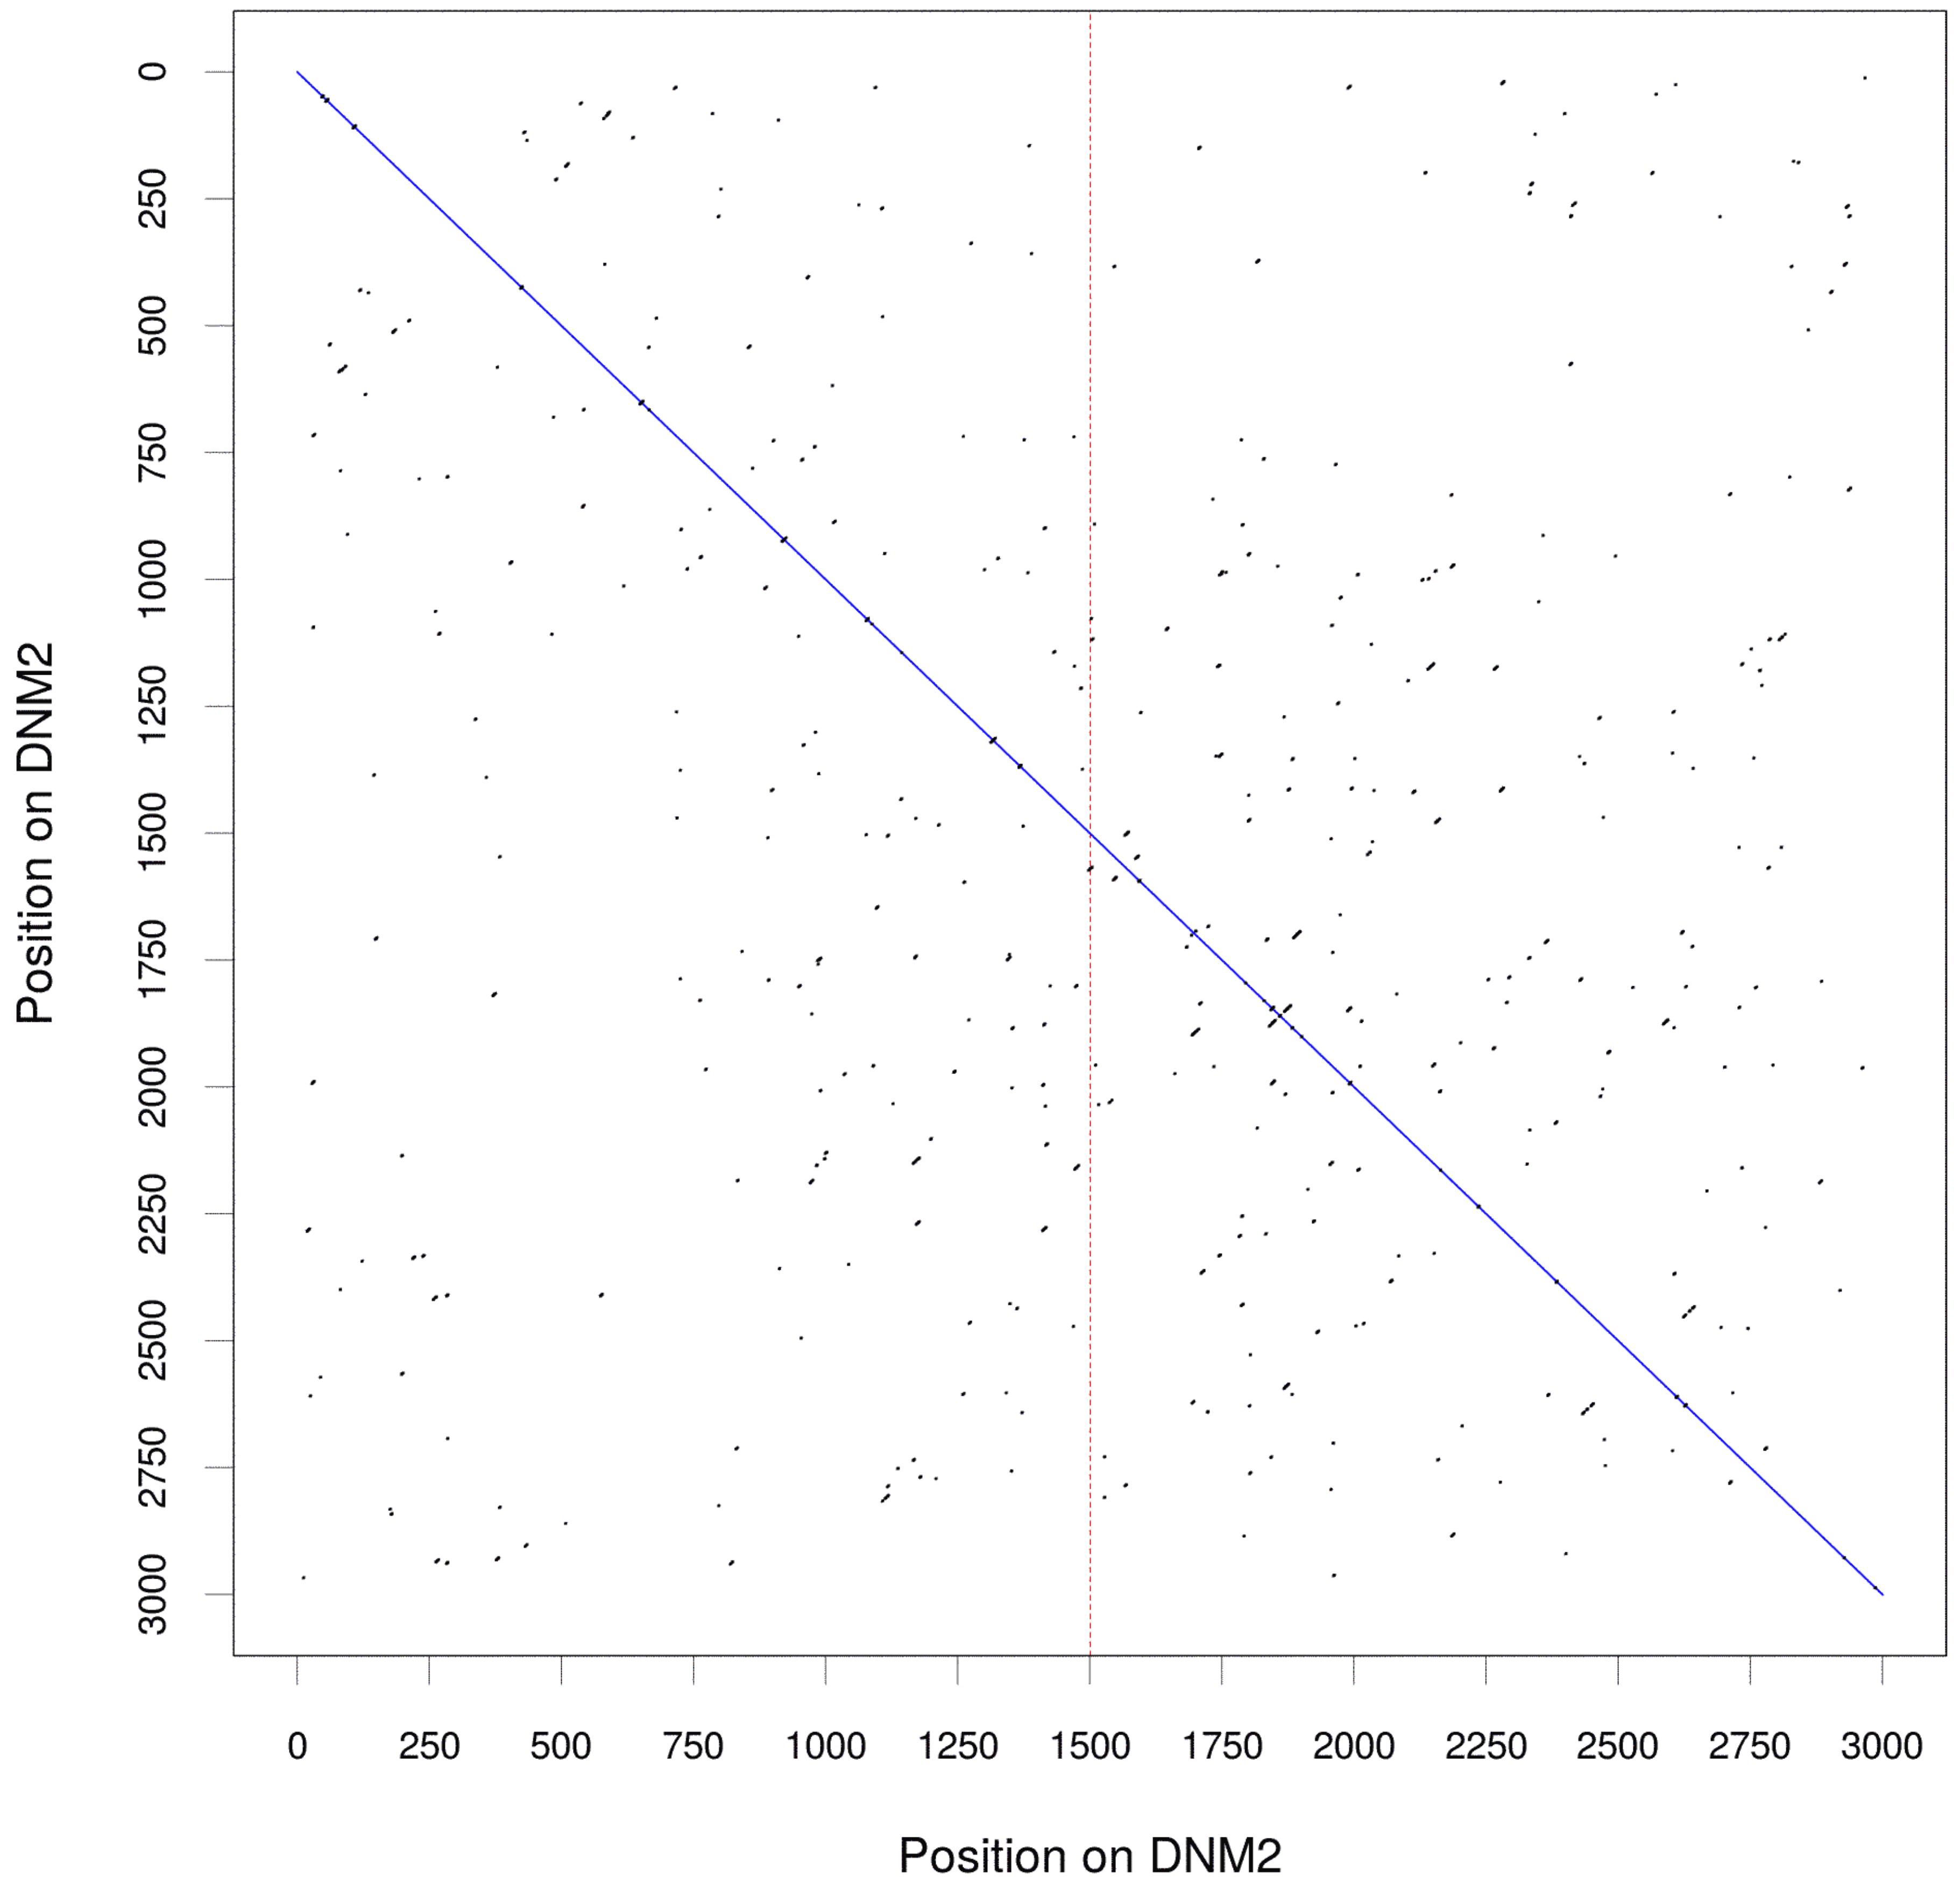

# DNTTIP1

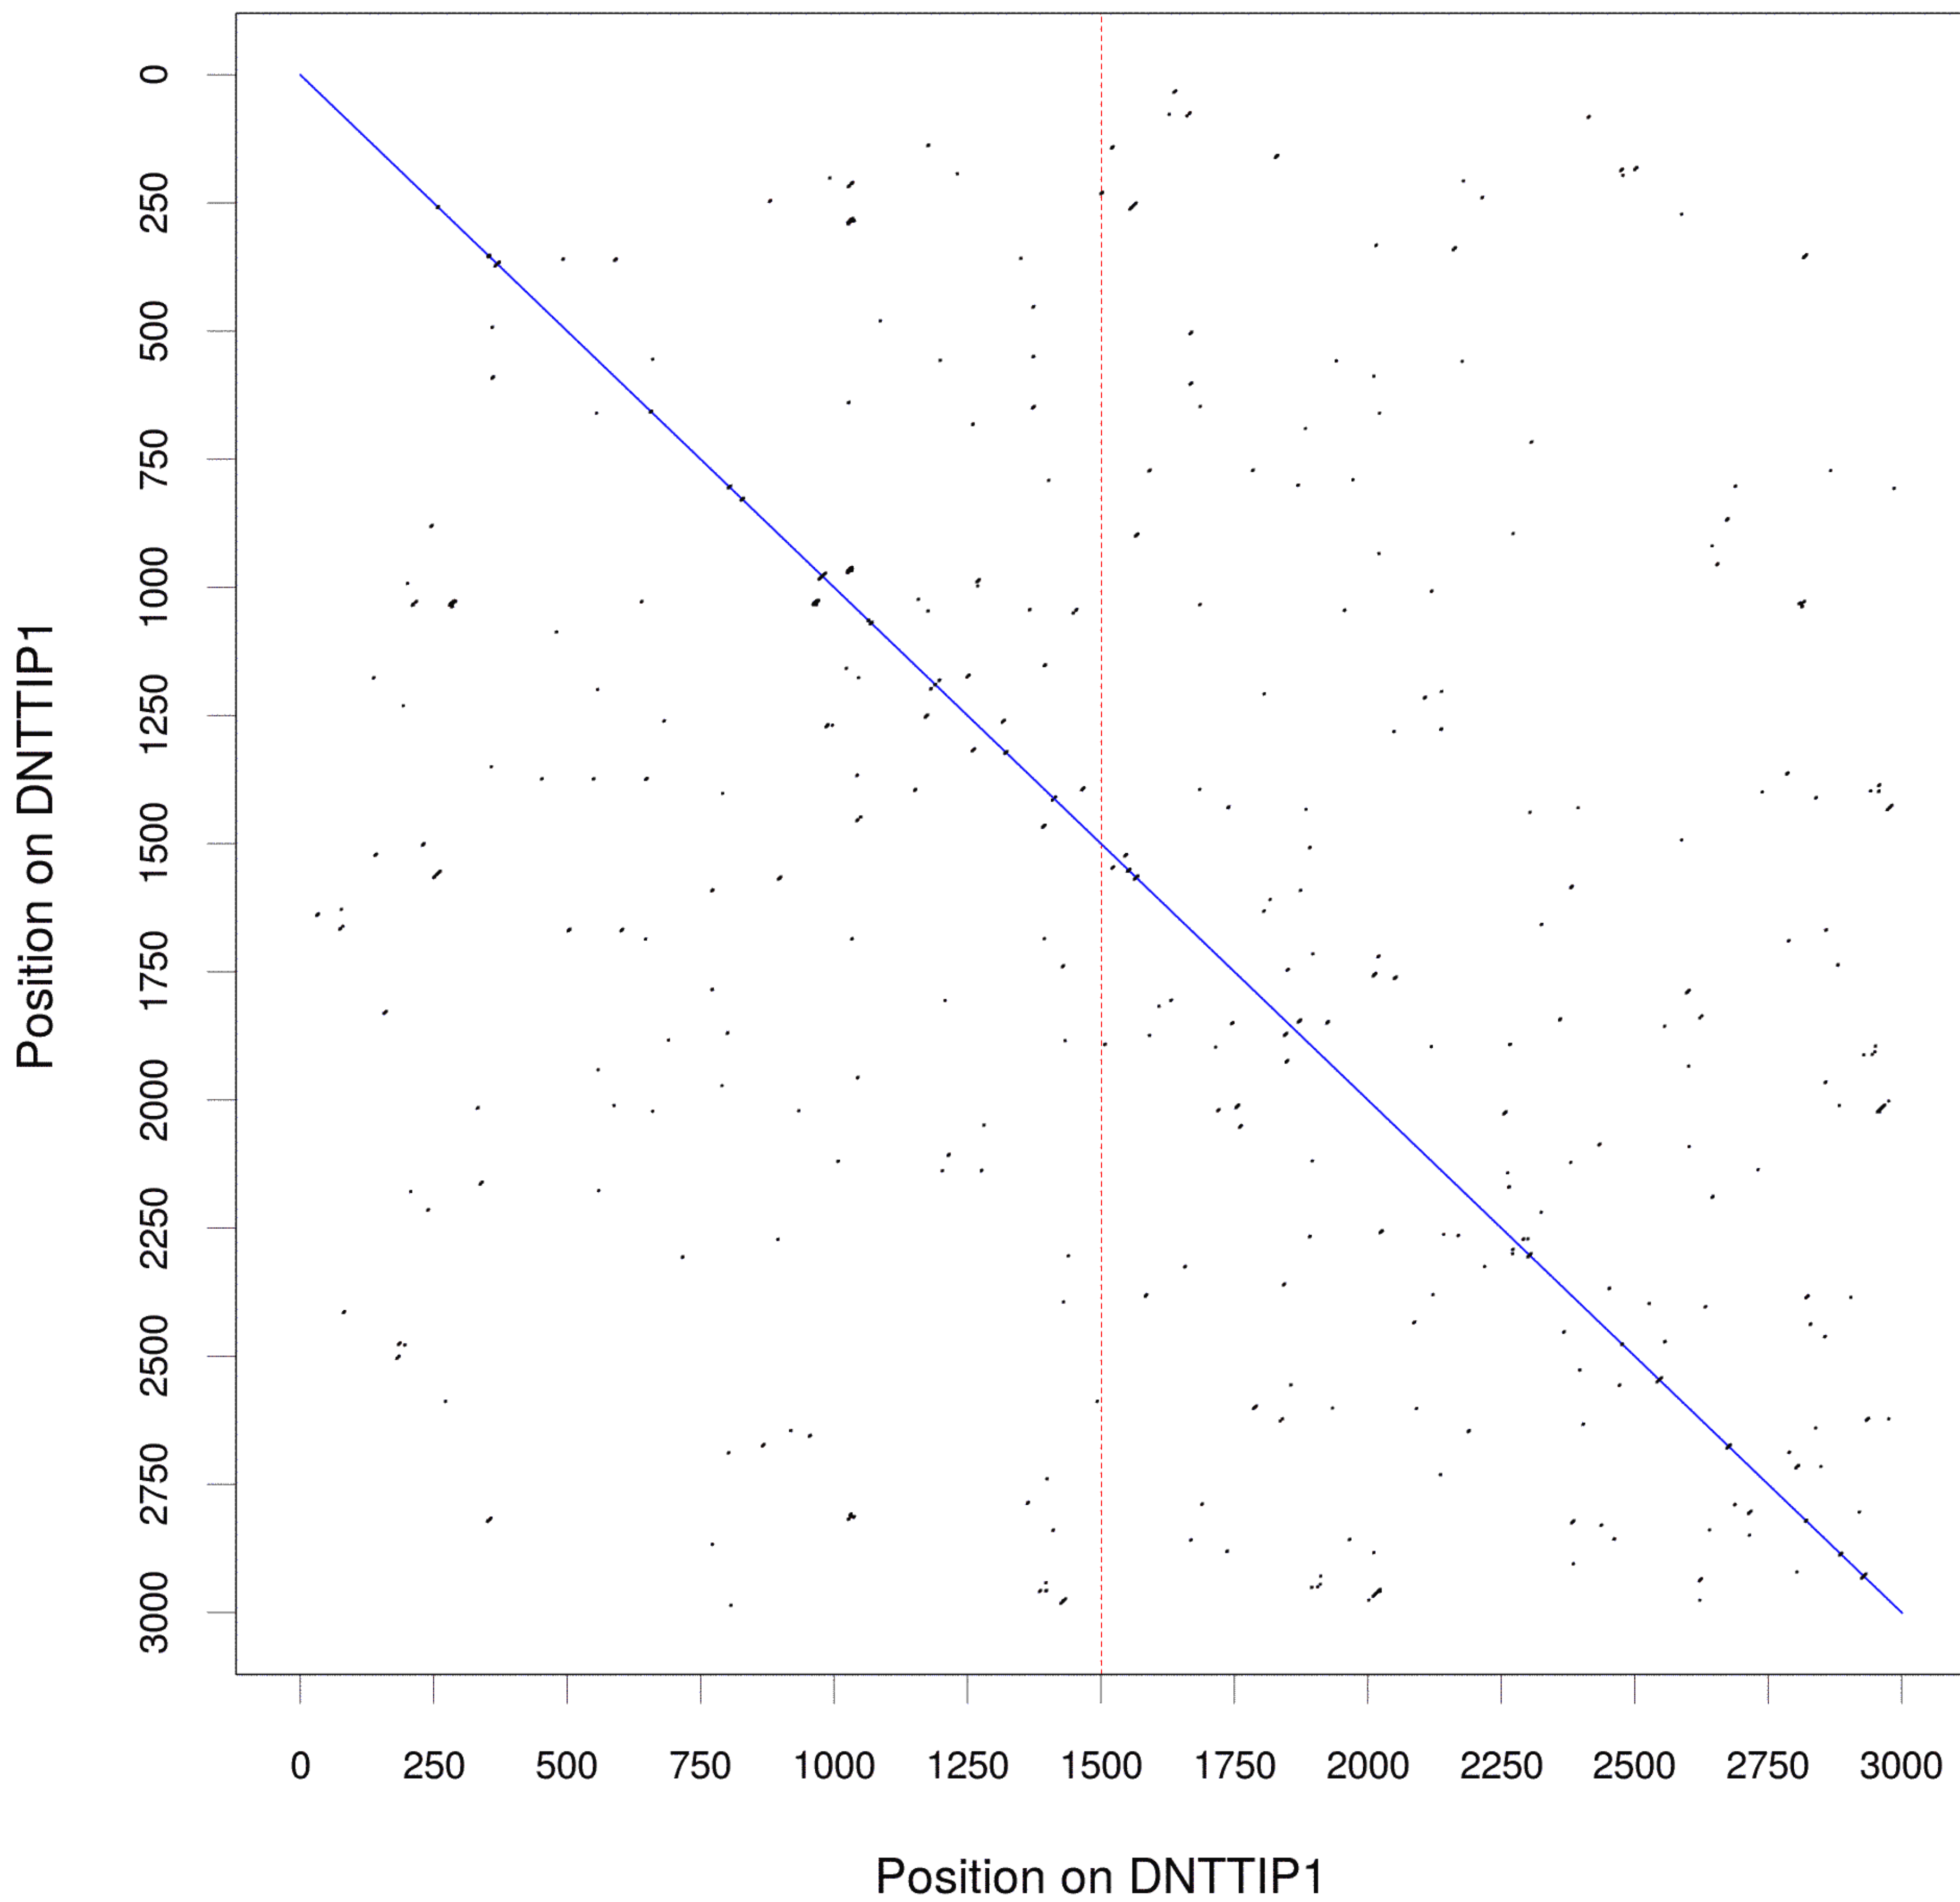

# DONSON

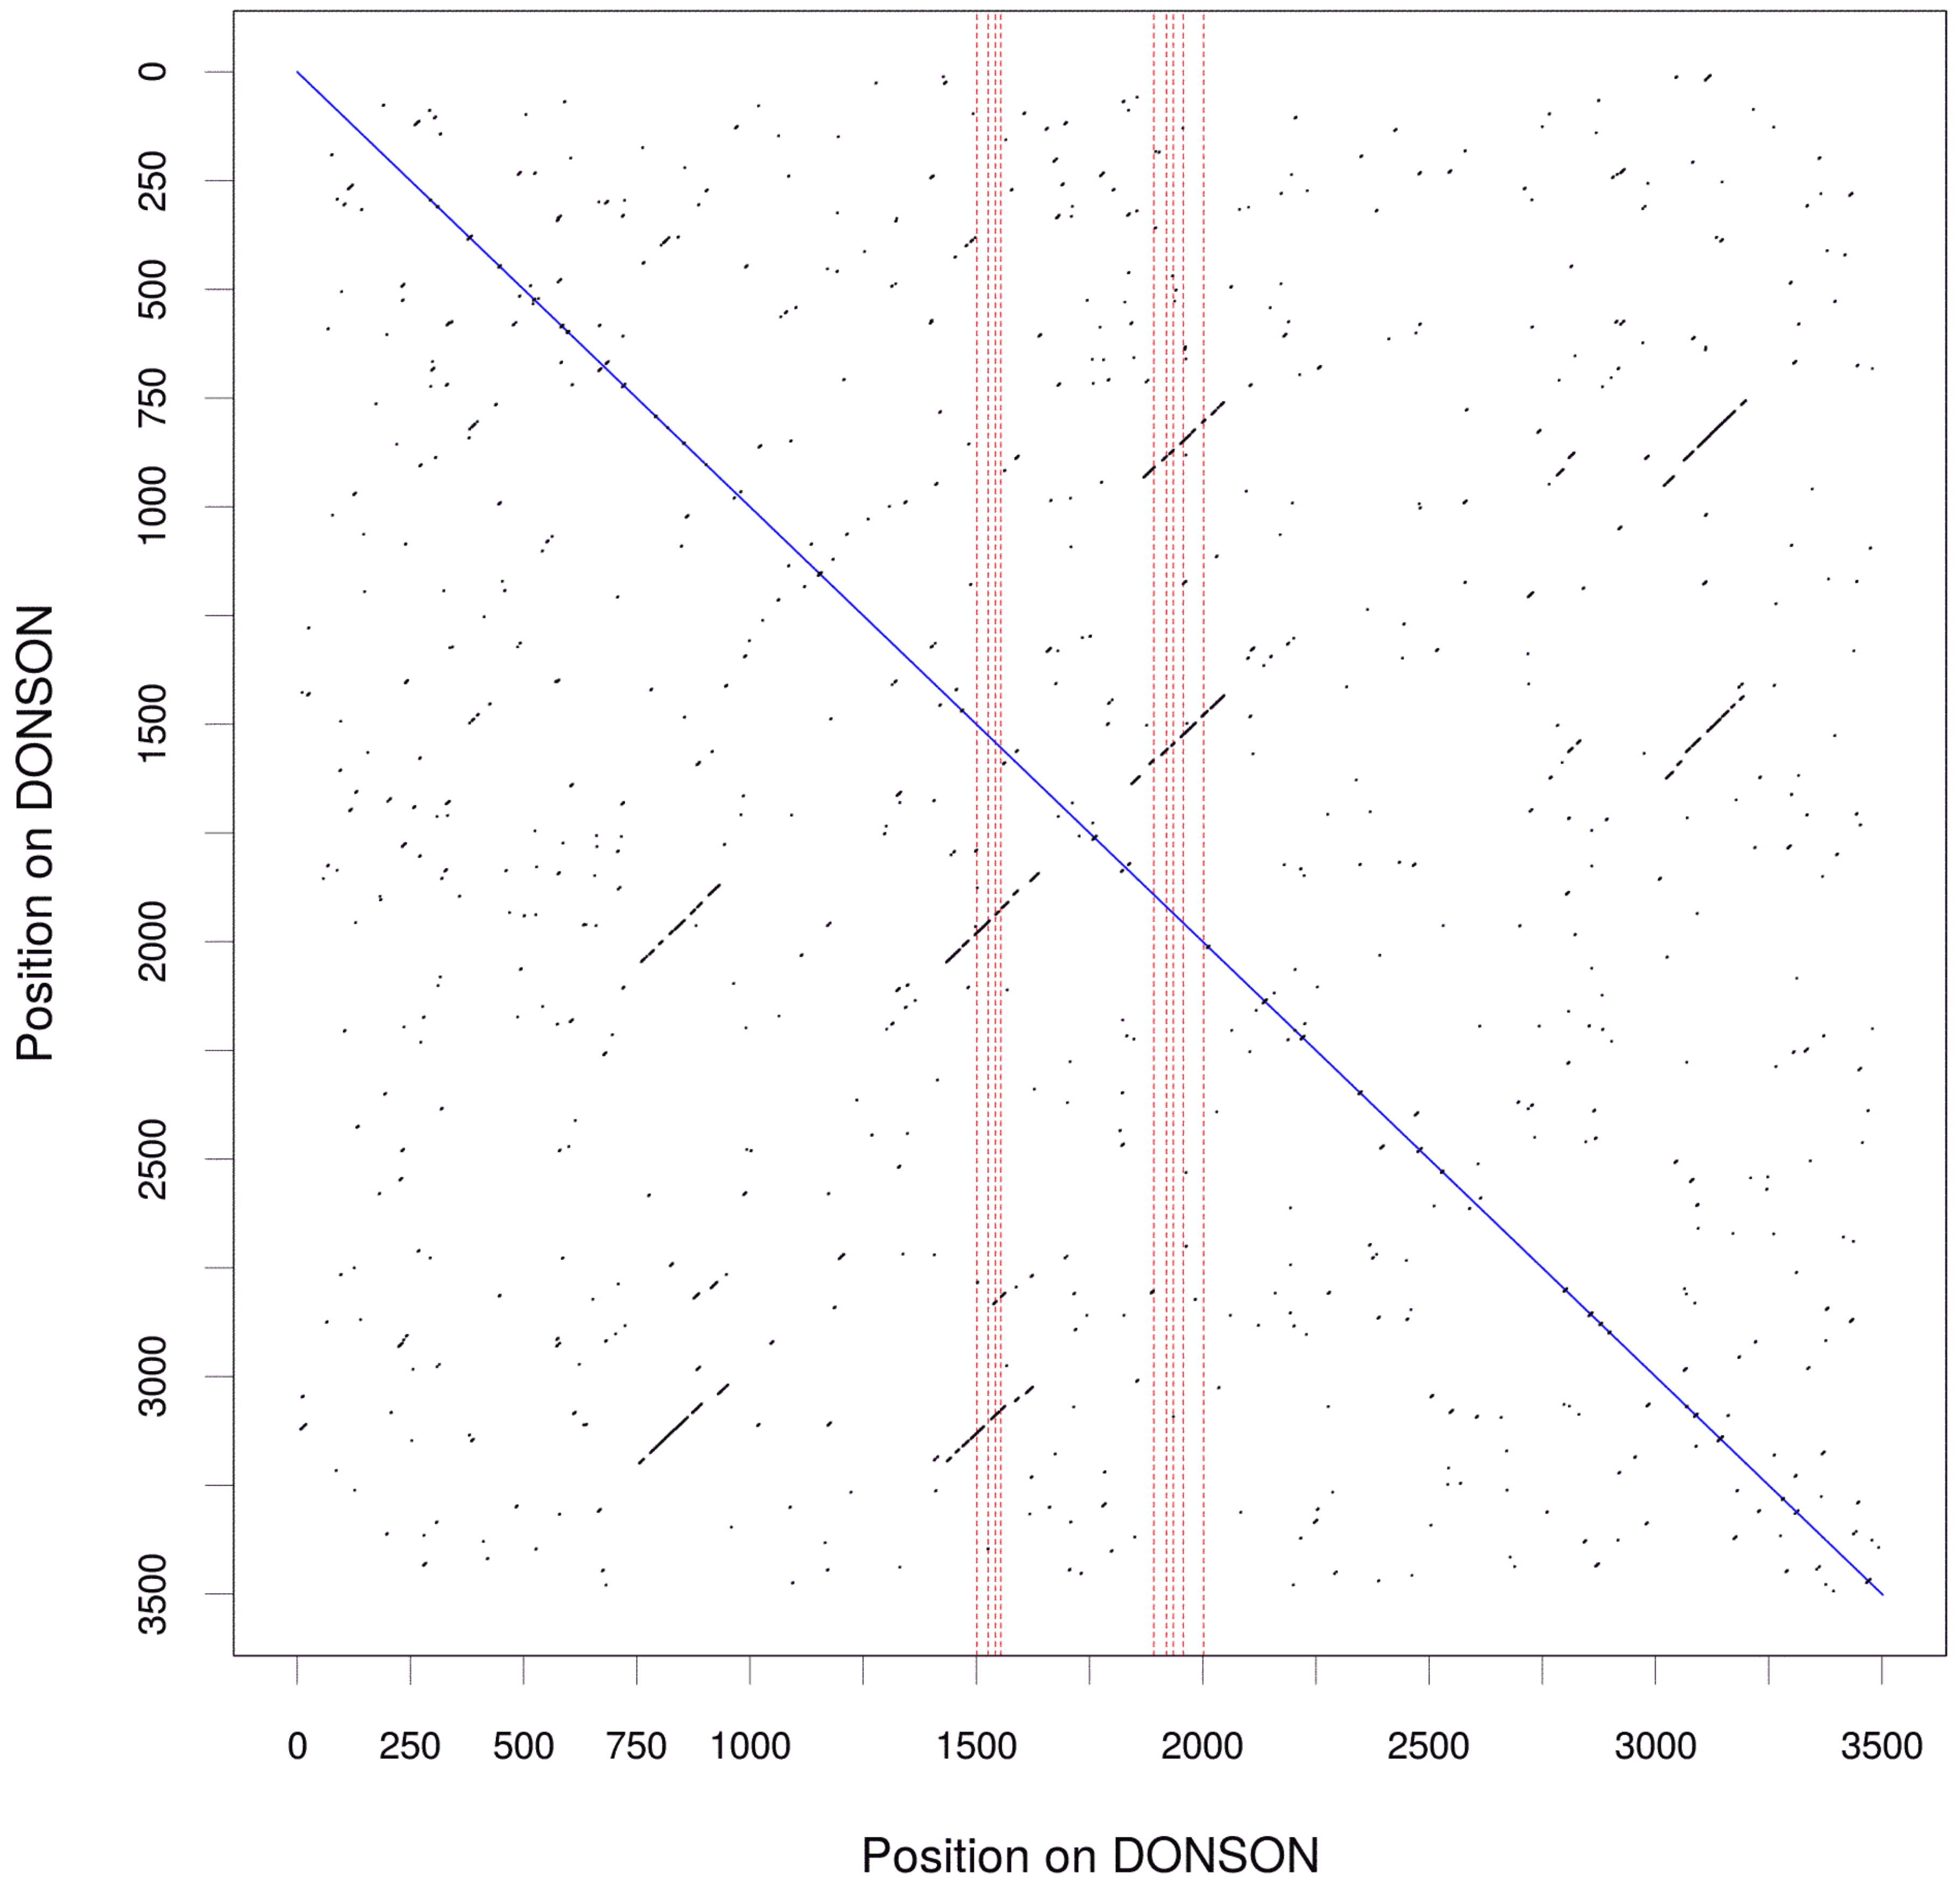

# DTNB

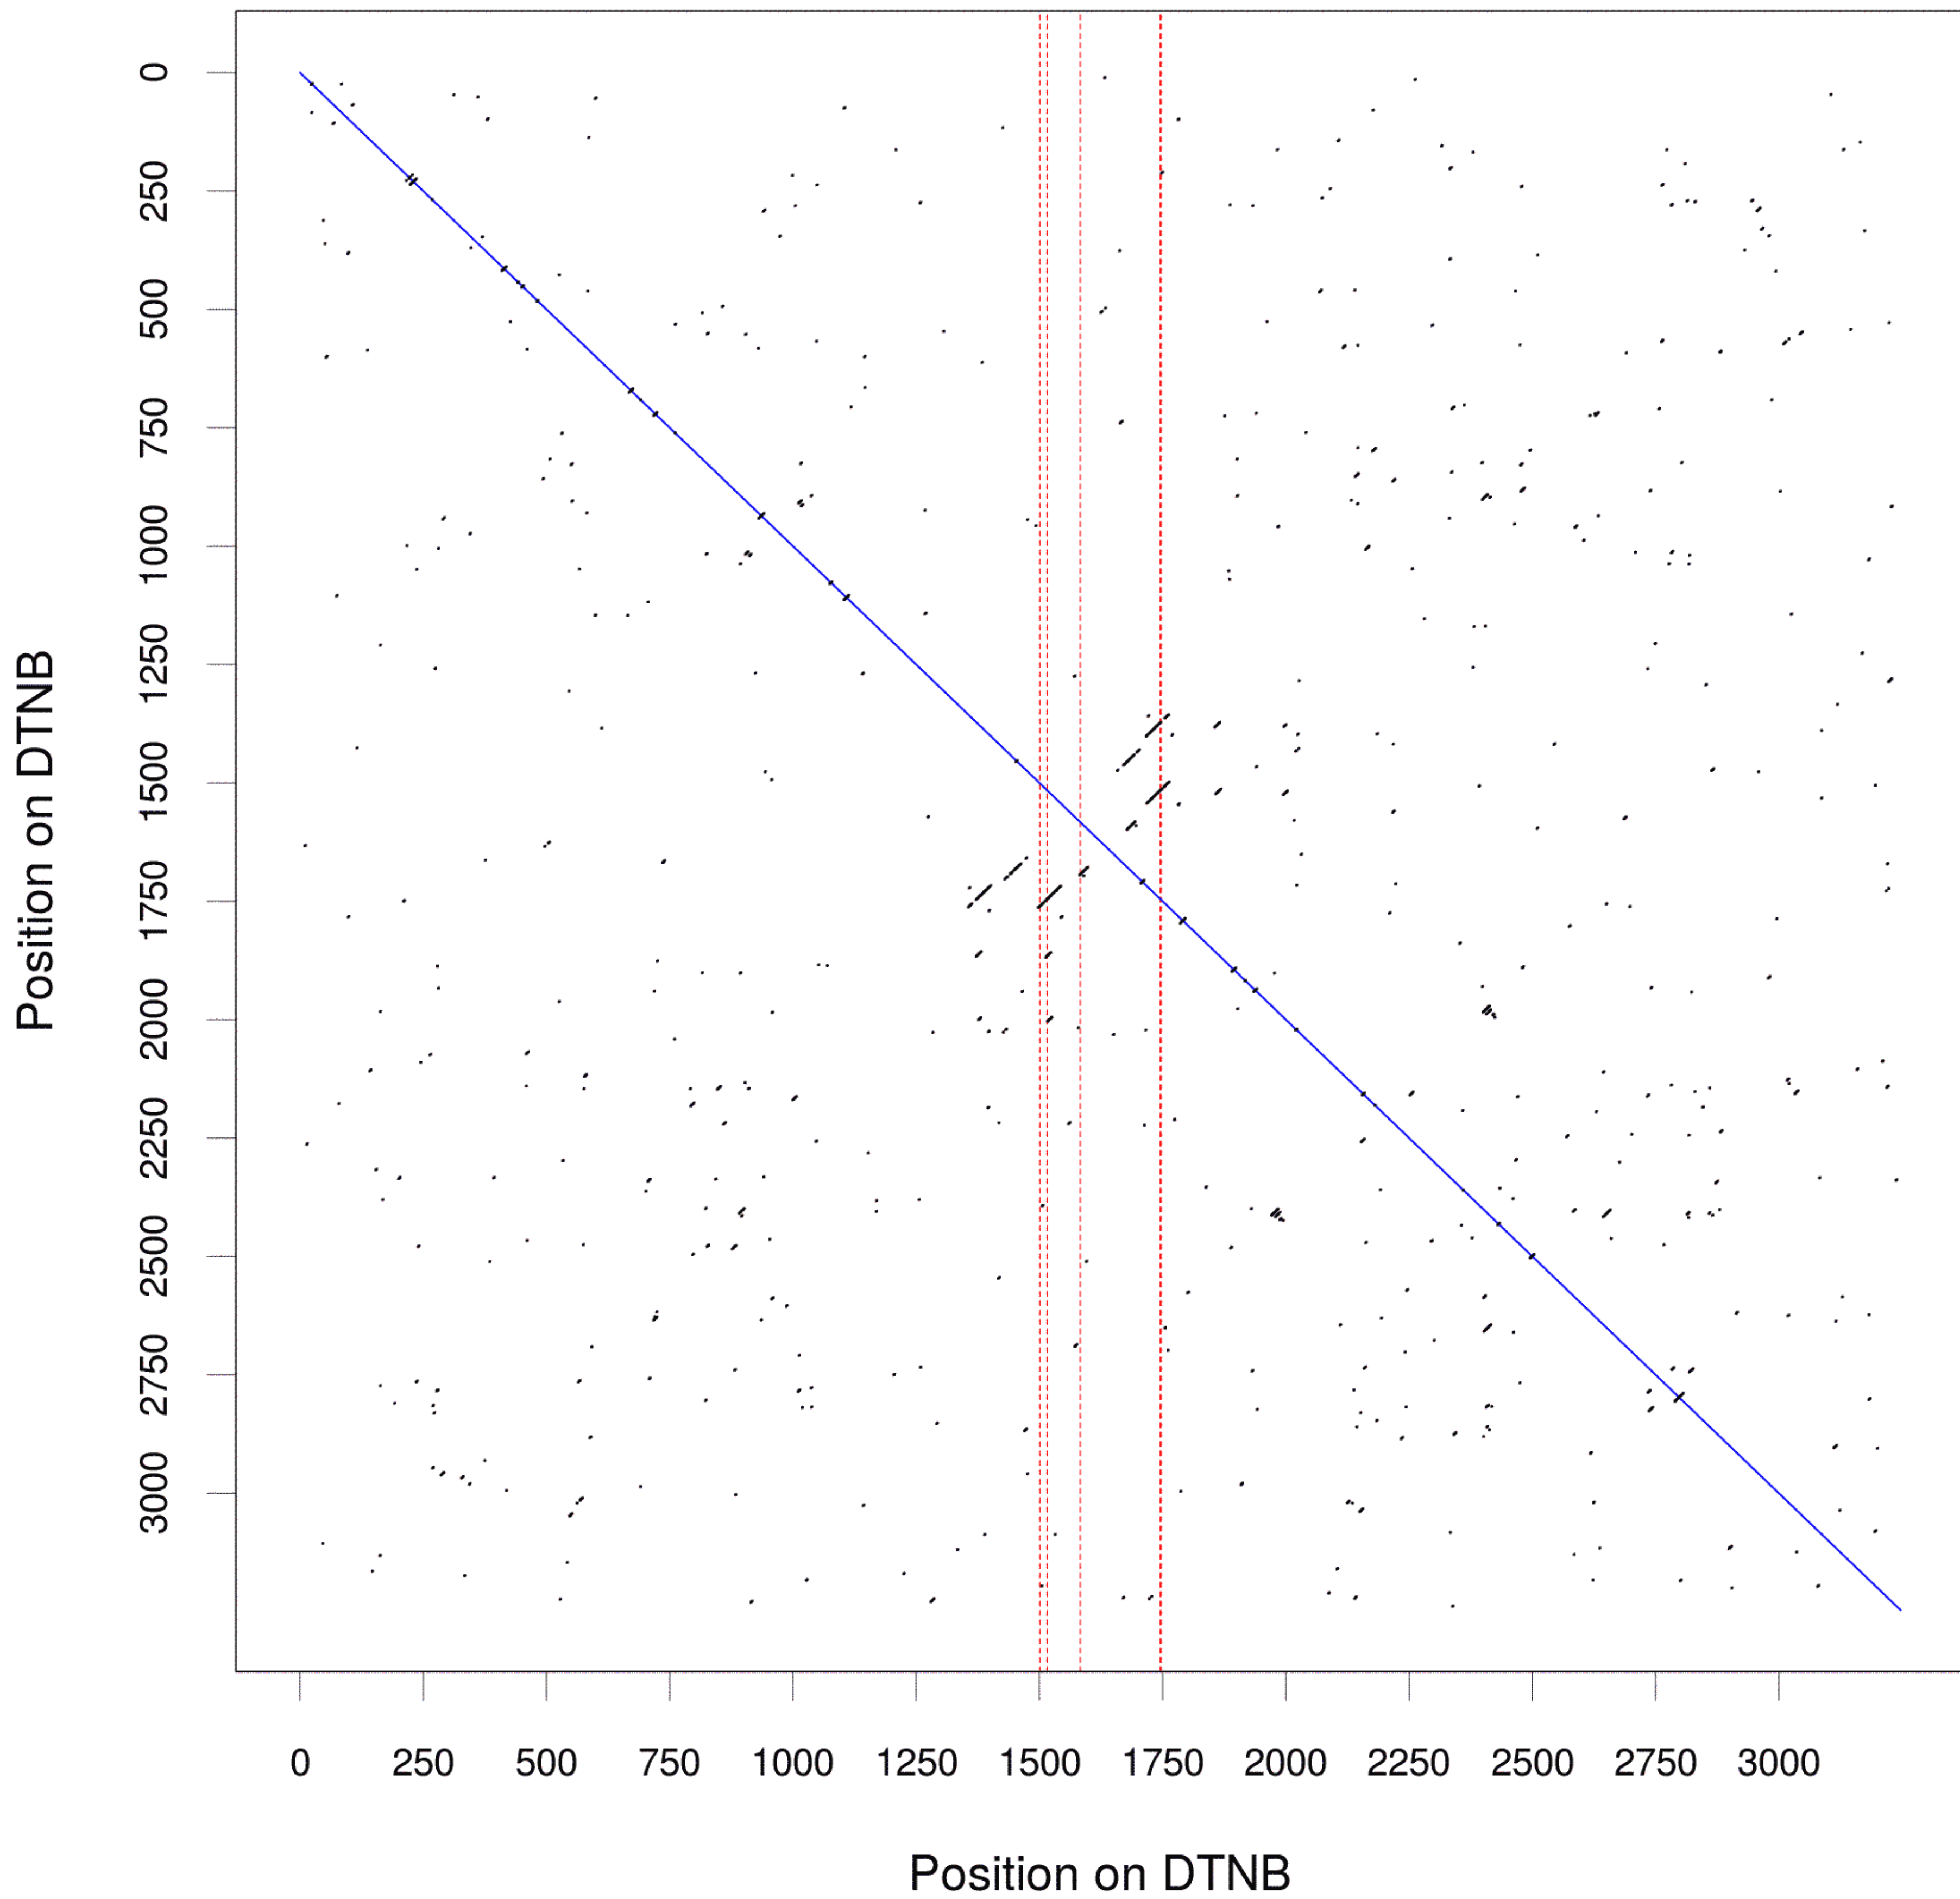

# DUSP19

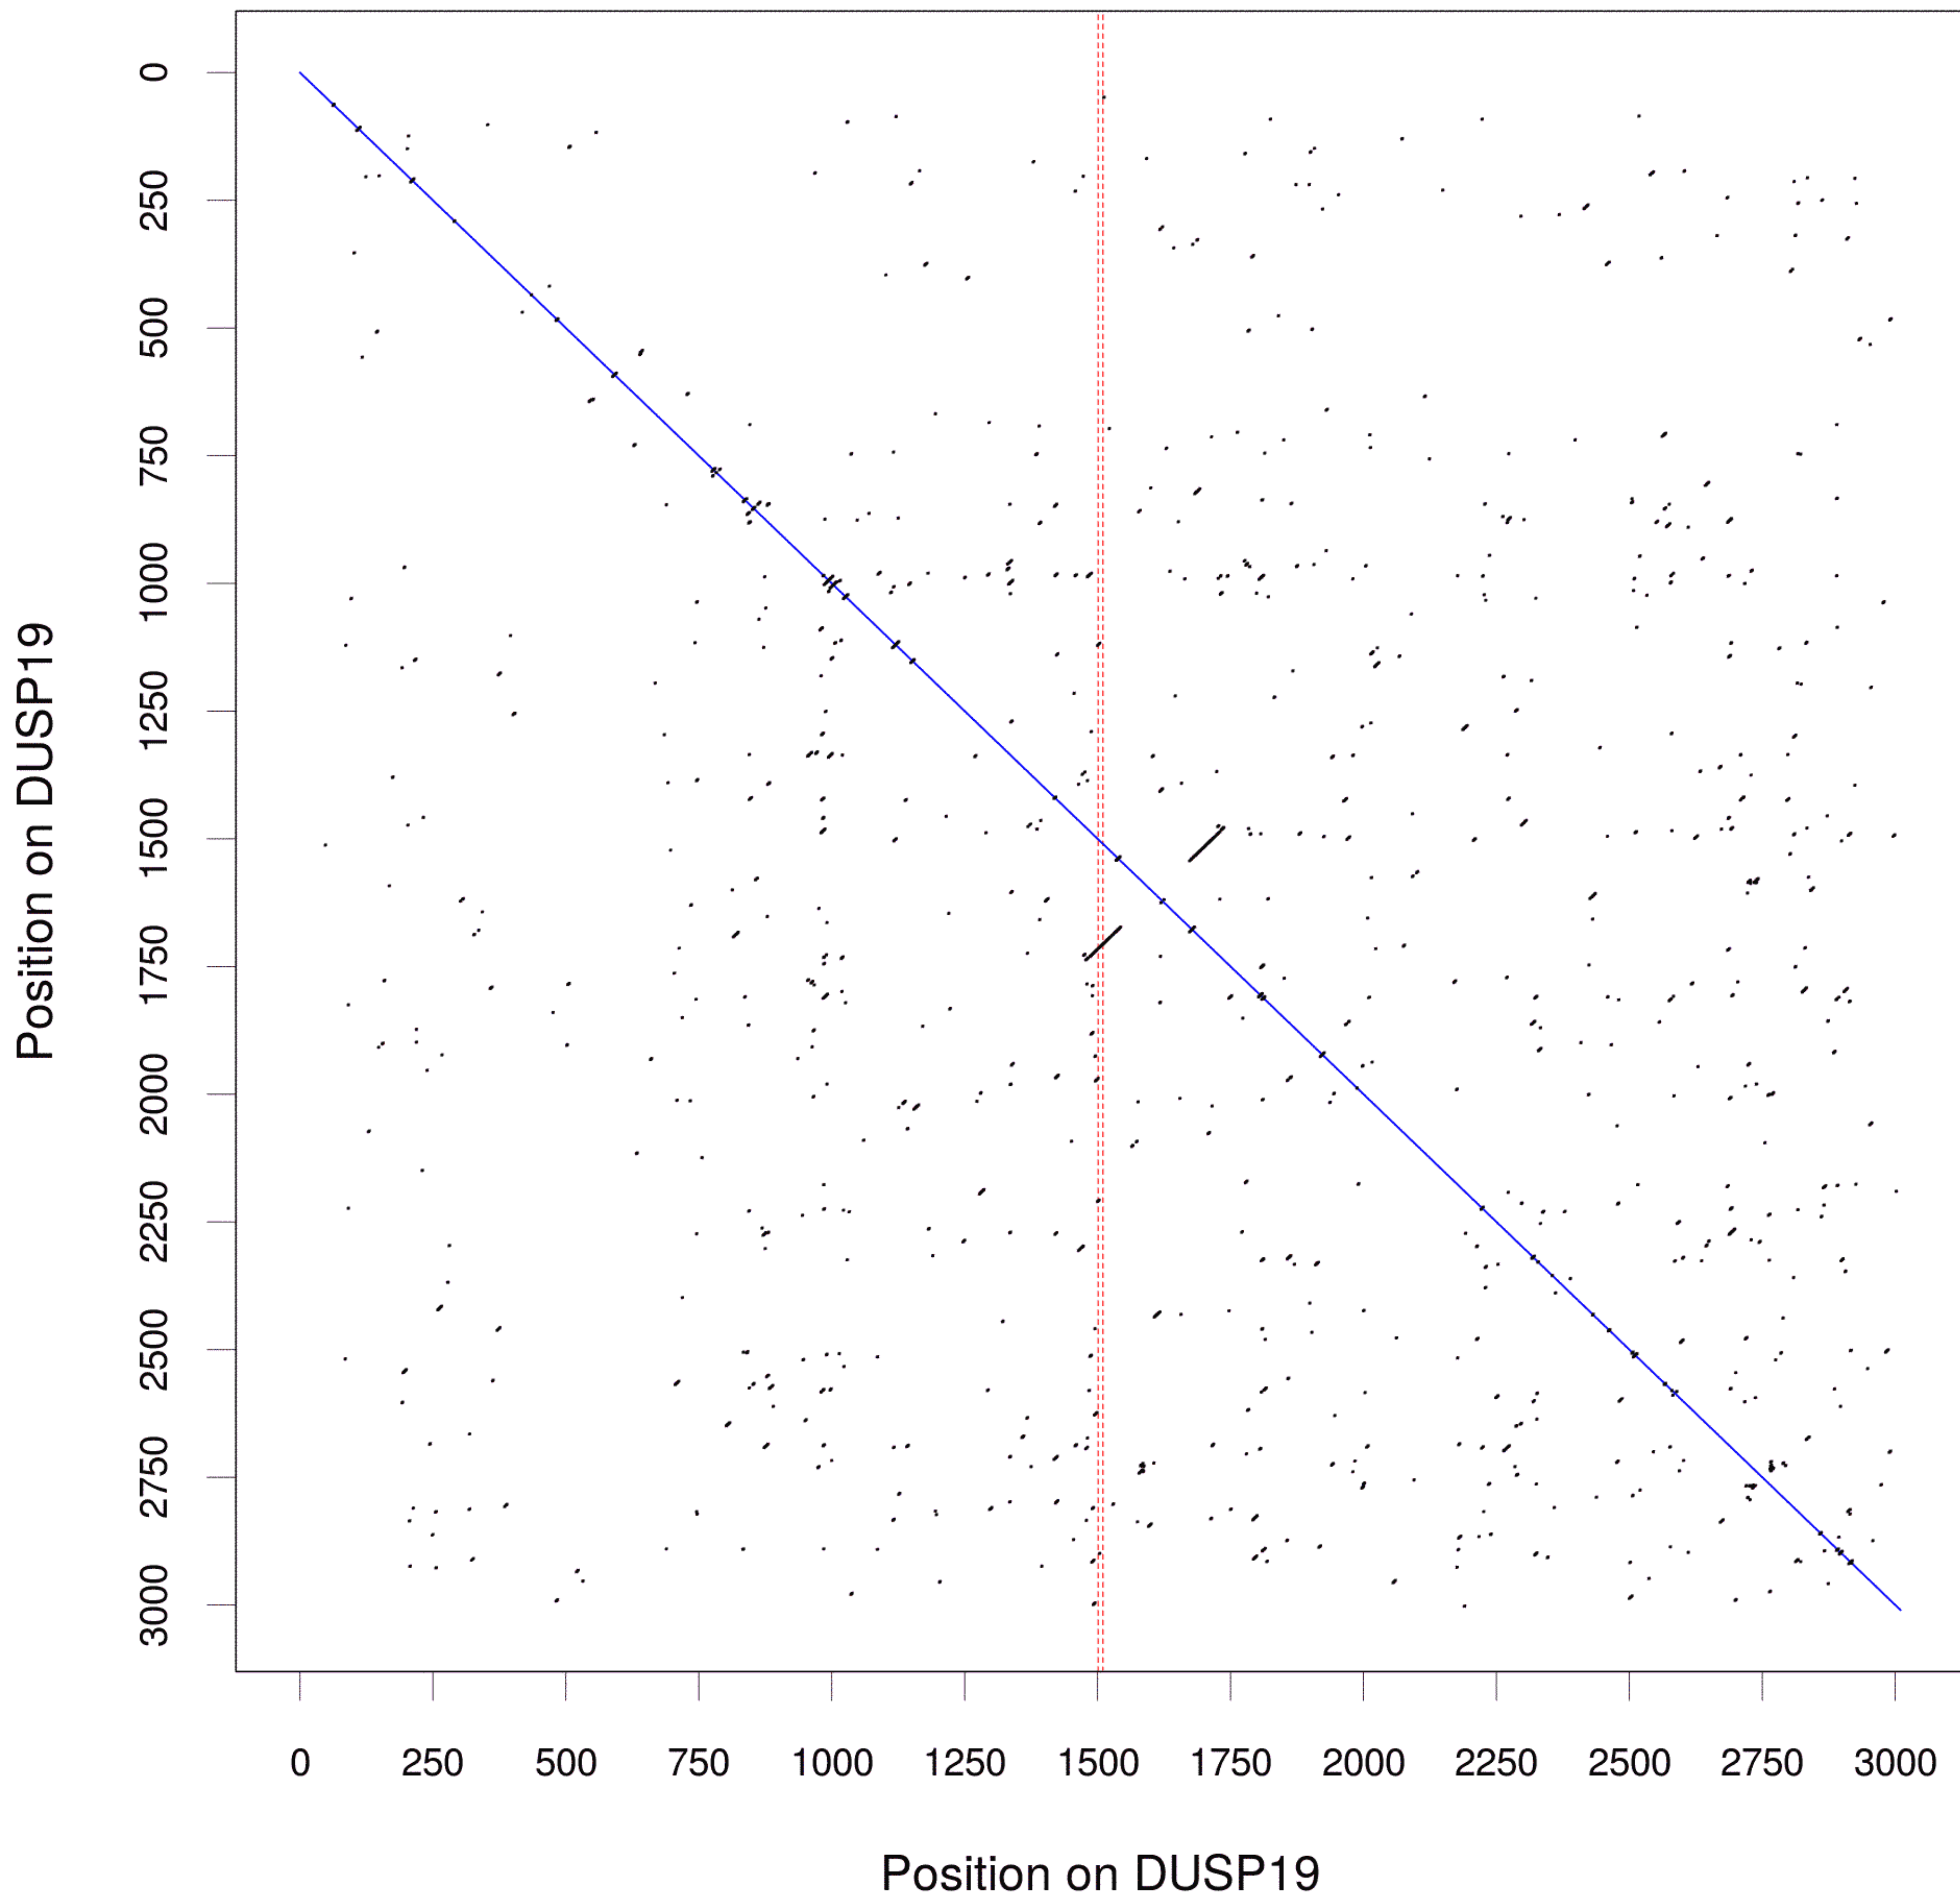



# EAPP

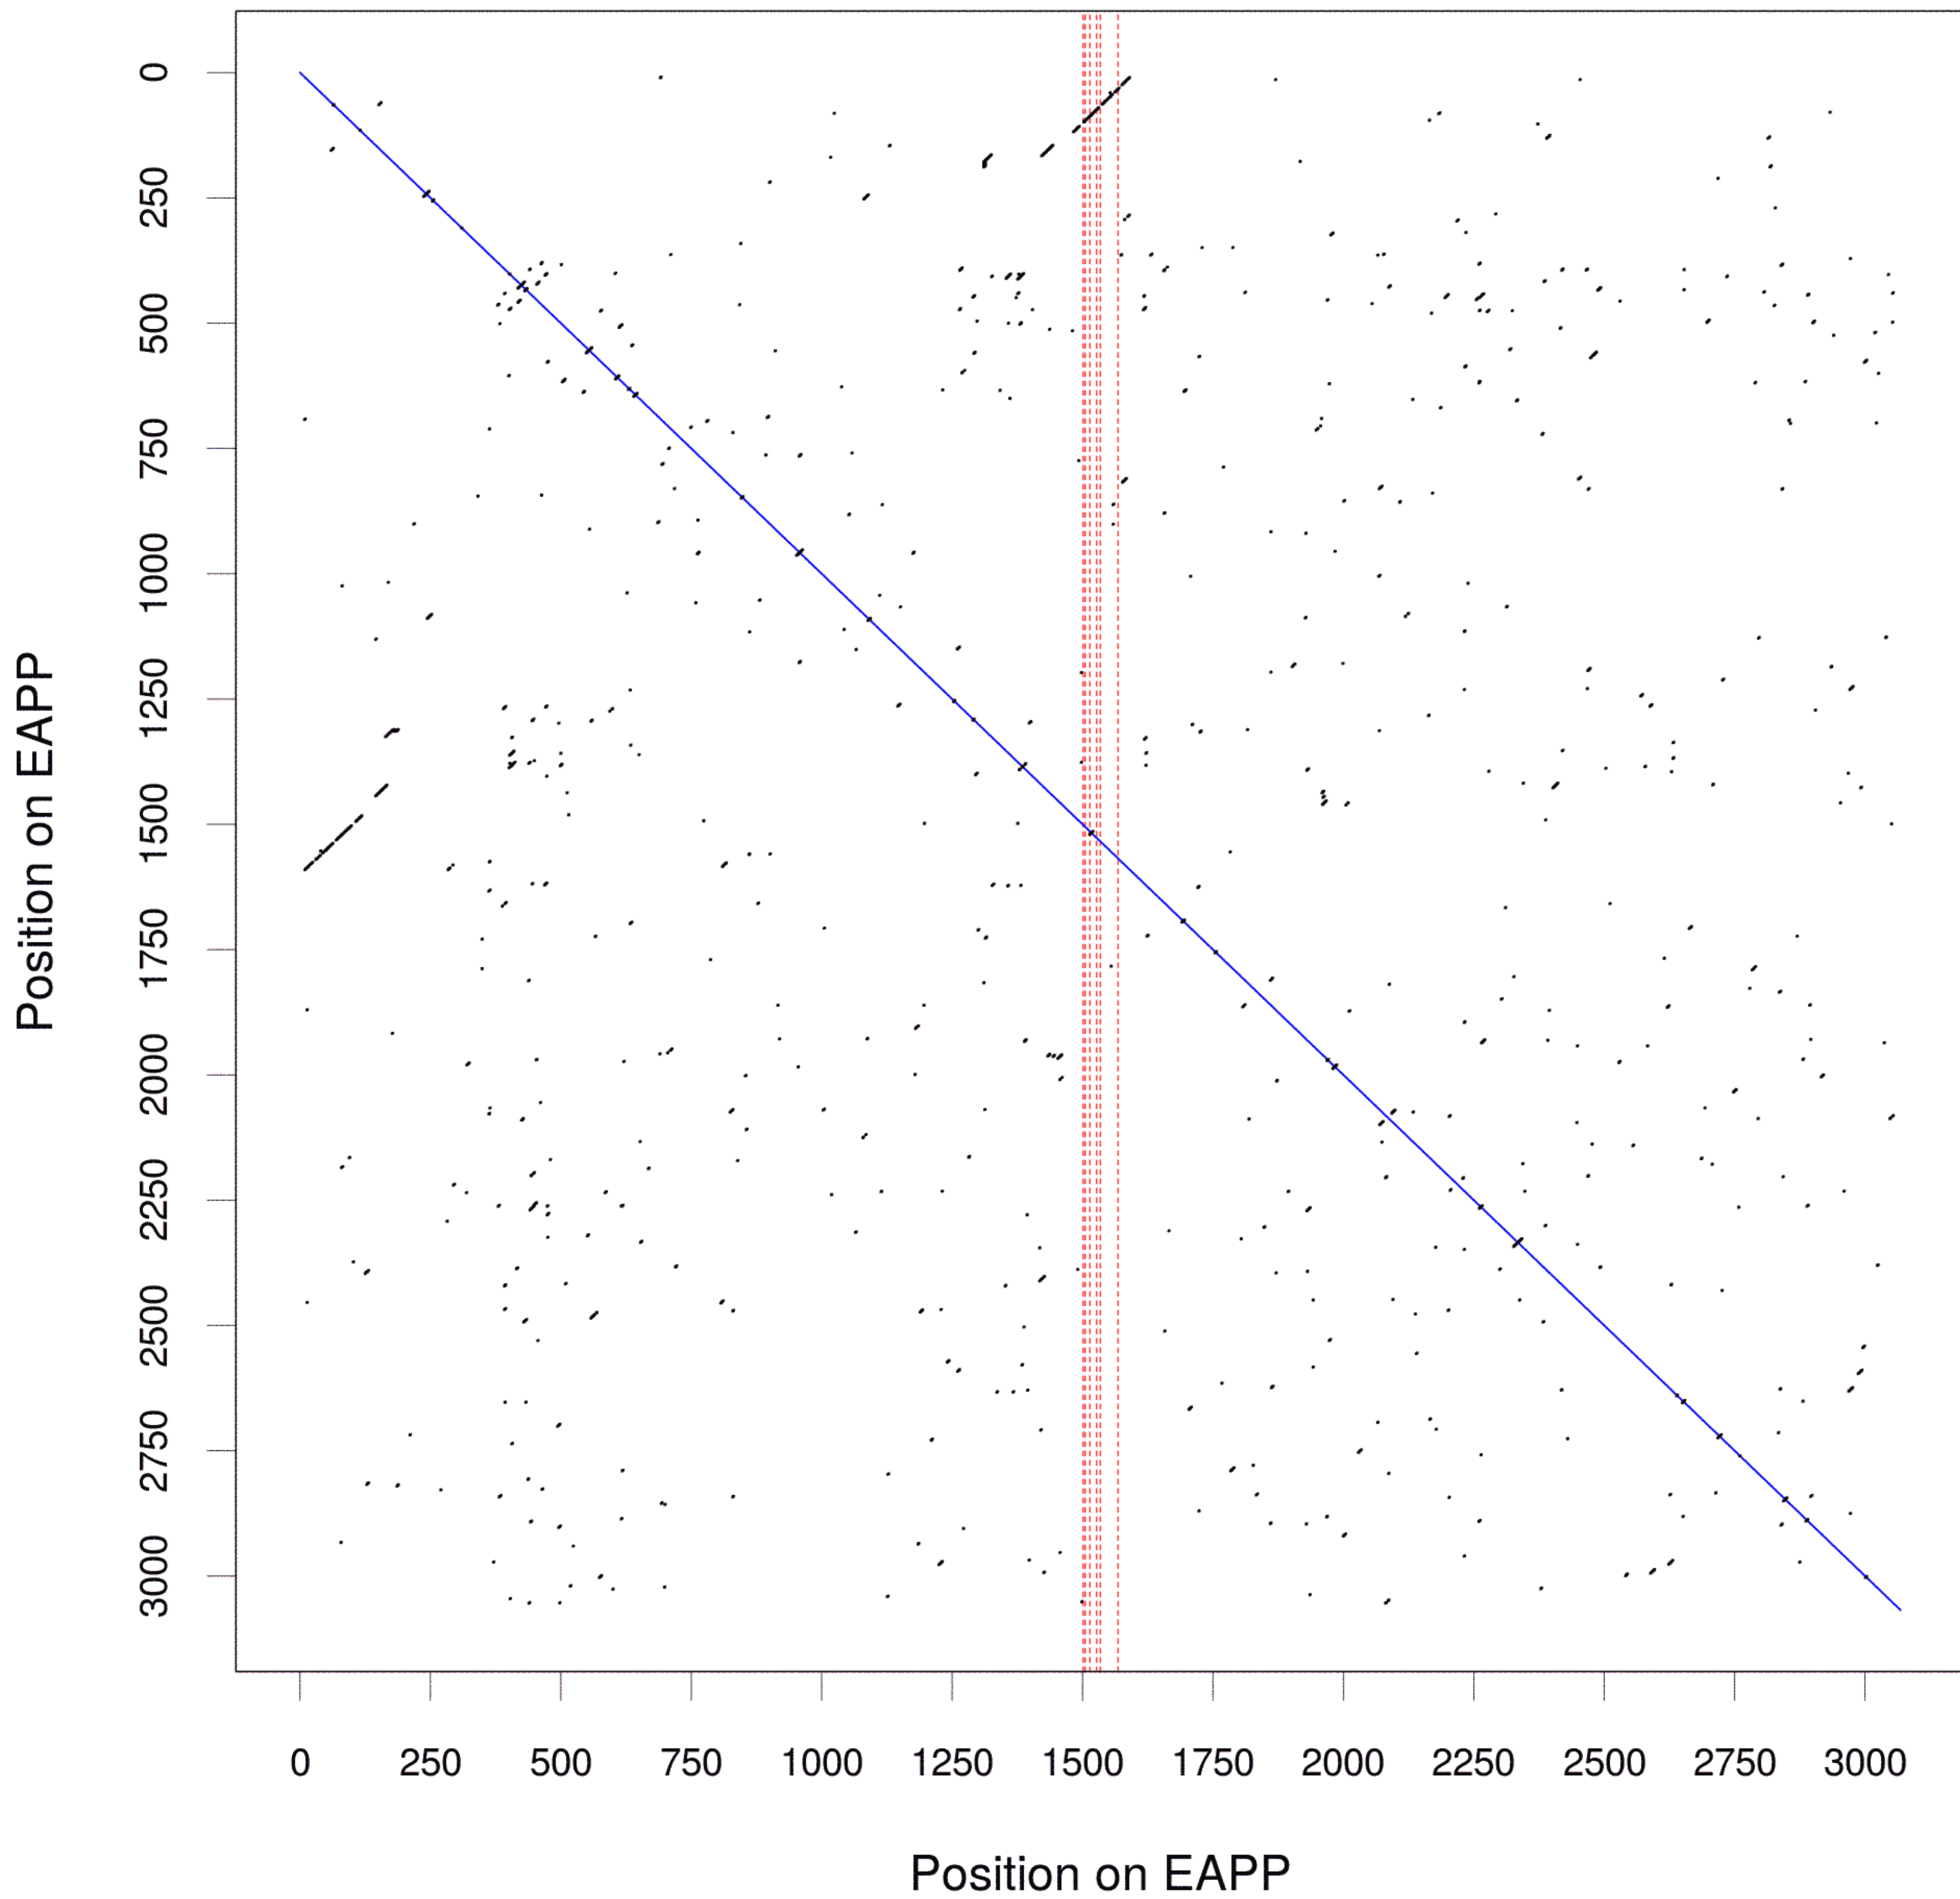

# ECH1

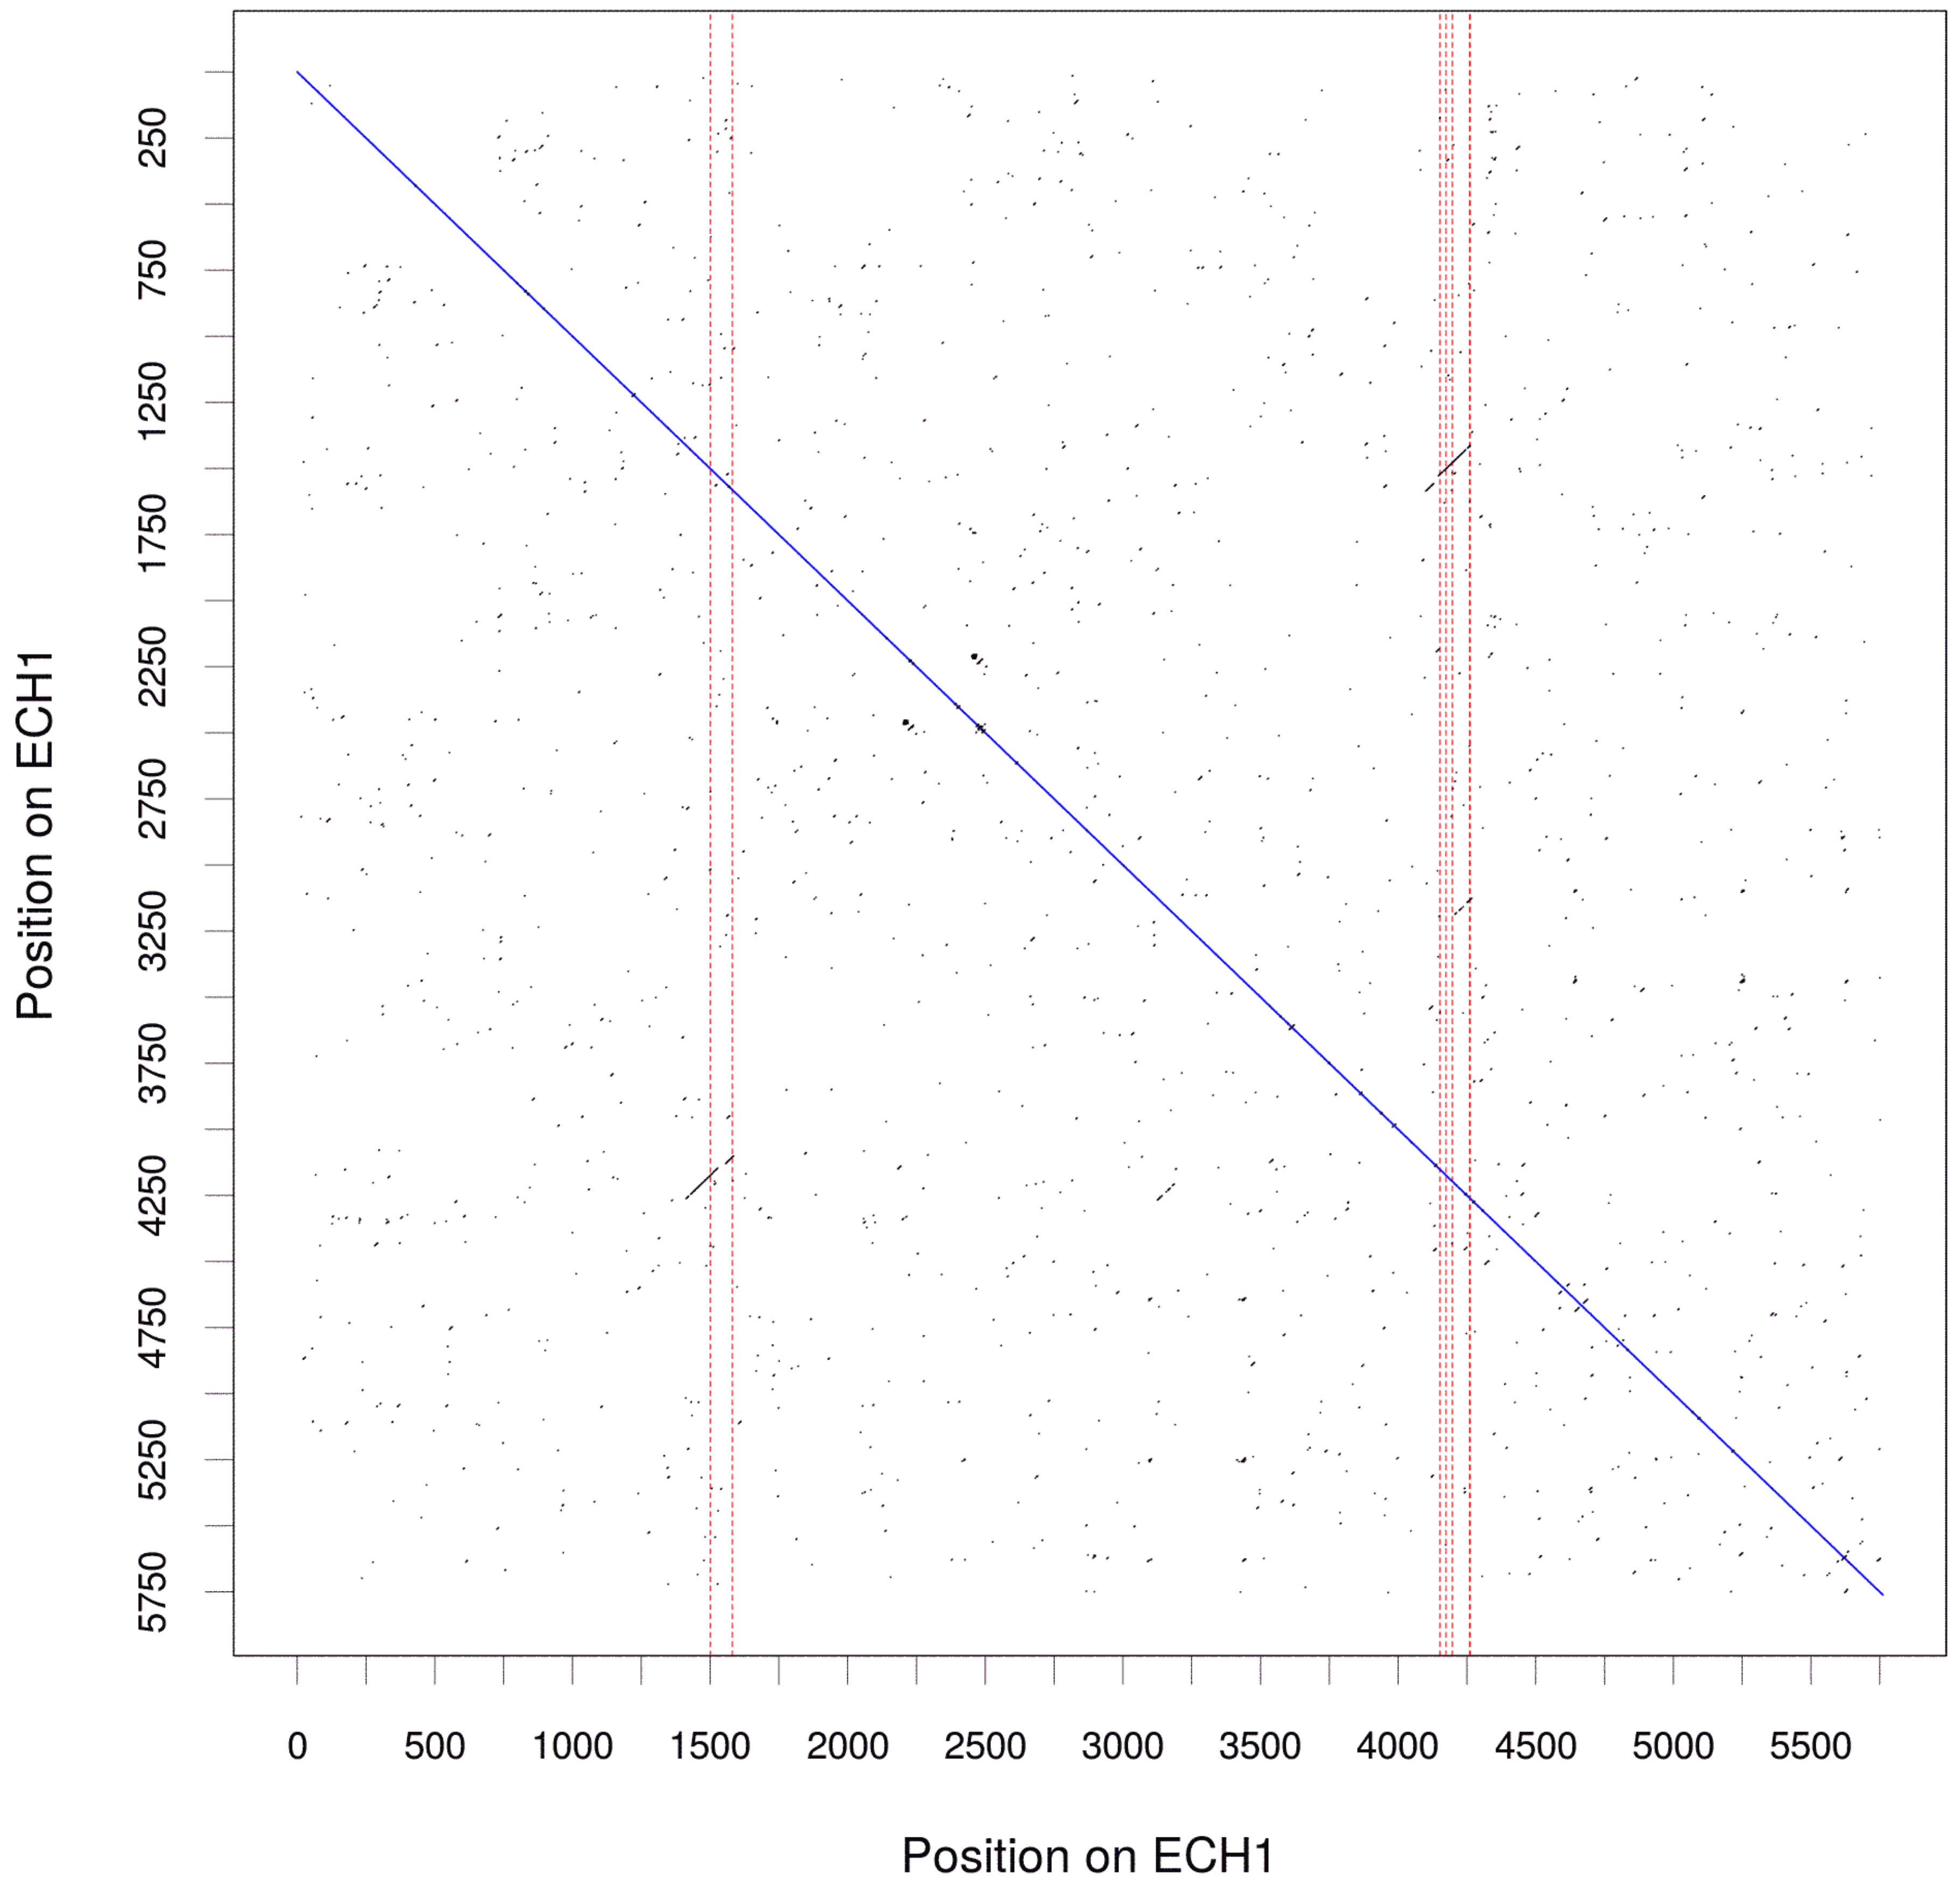

# ECHDC3

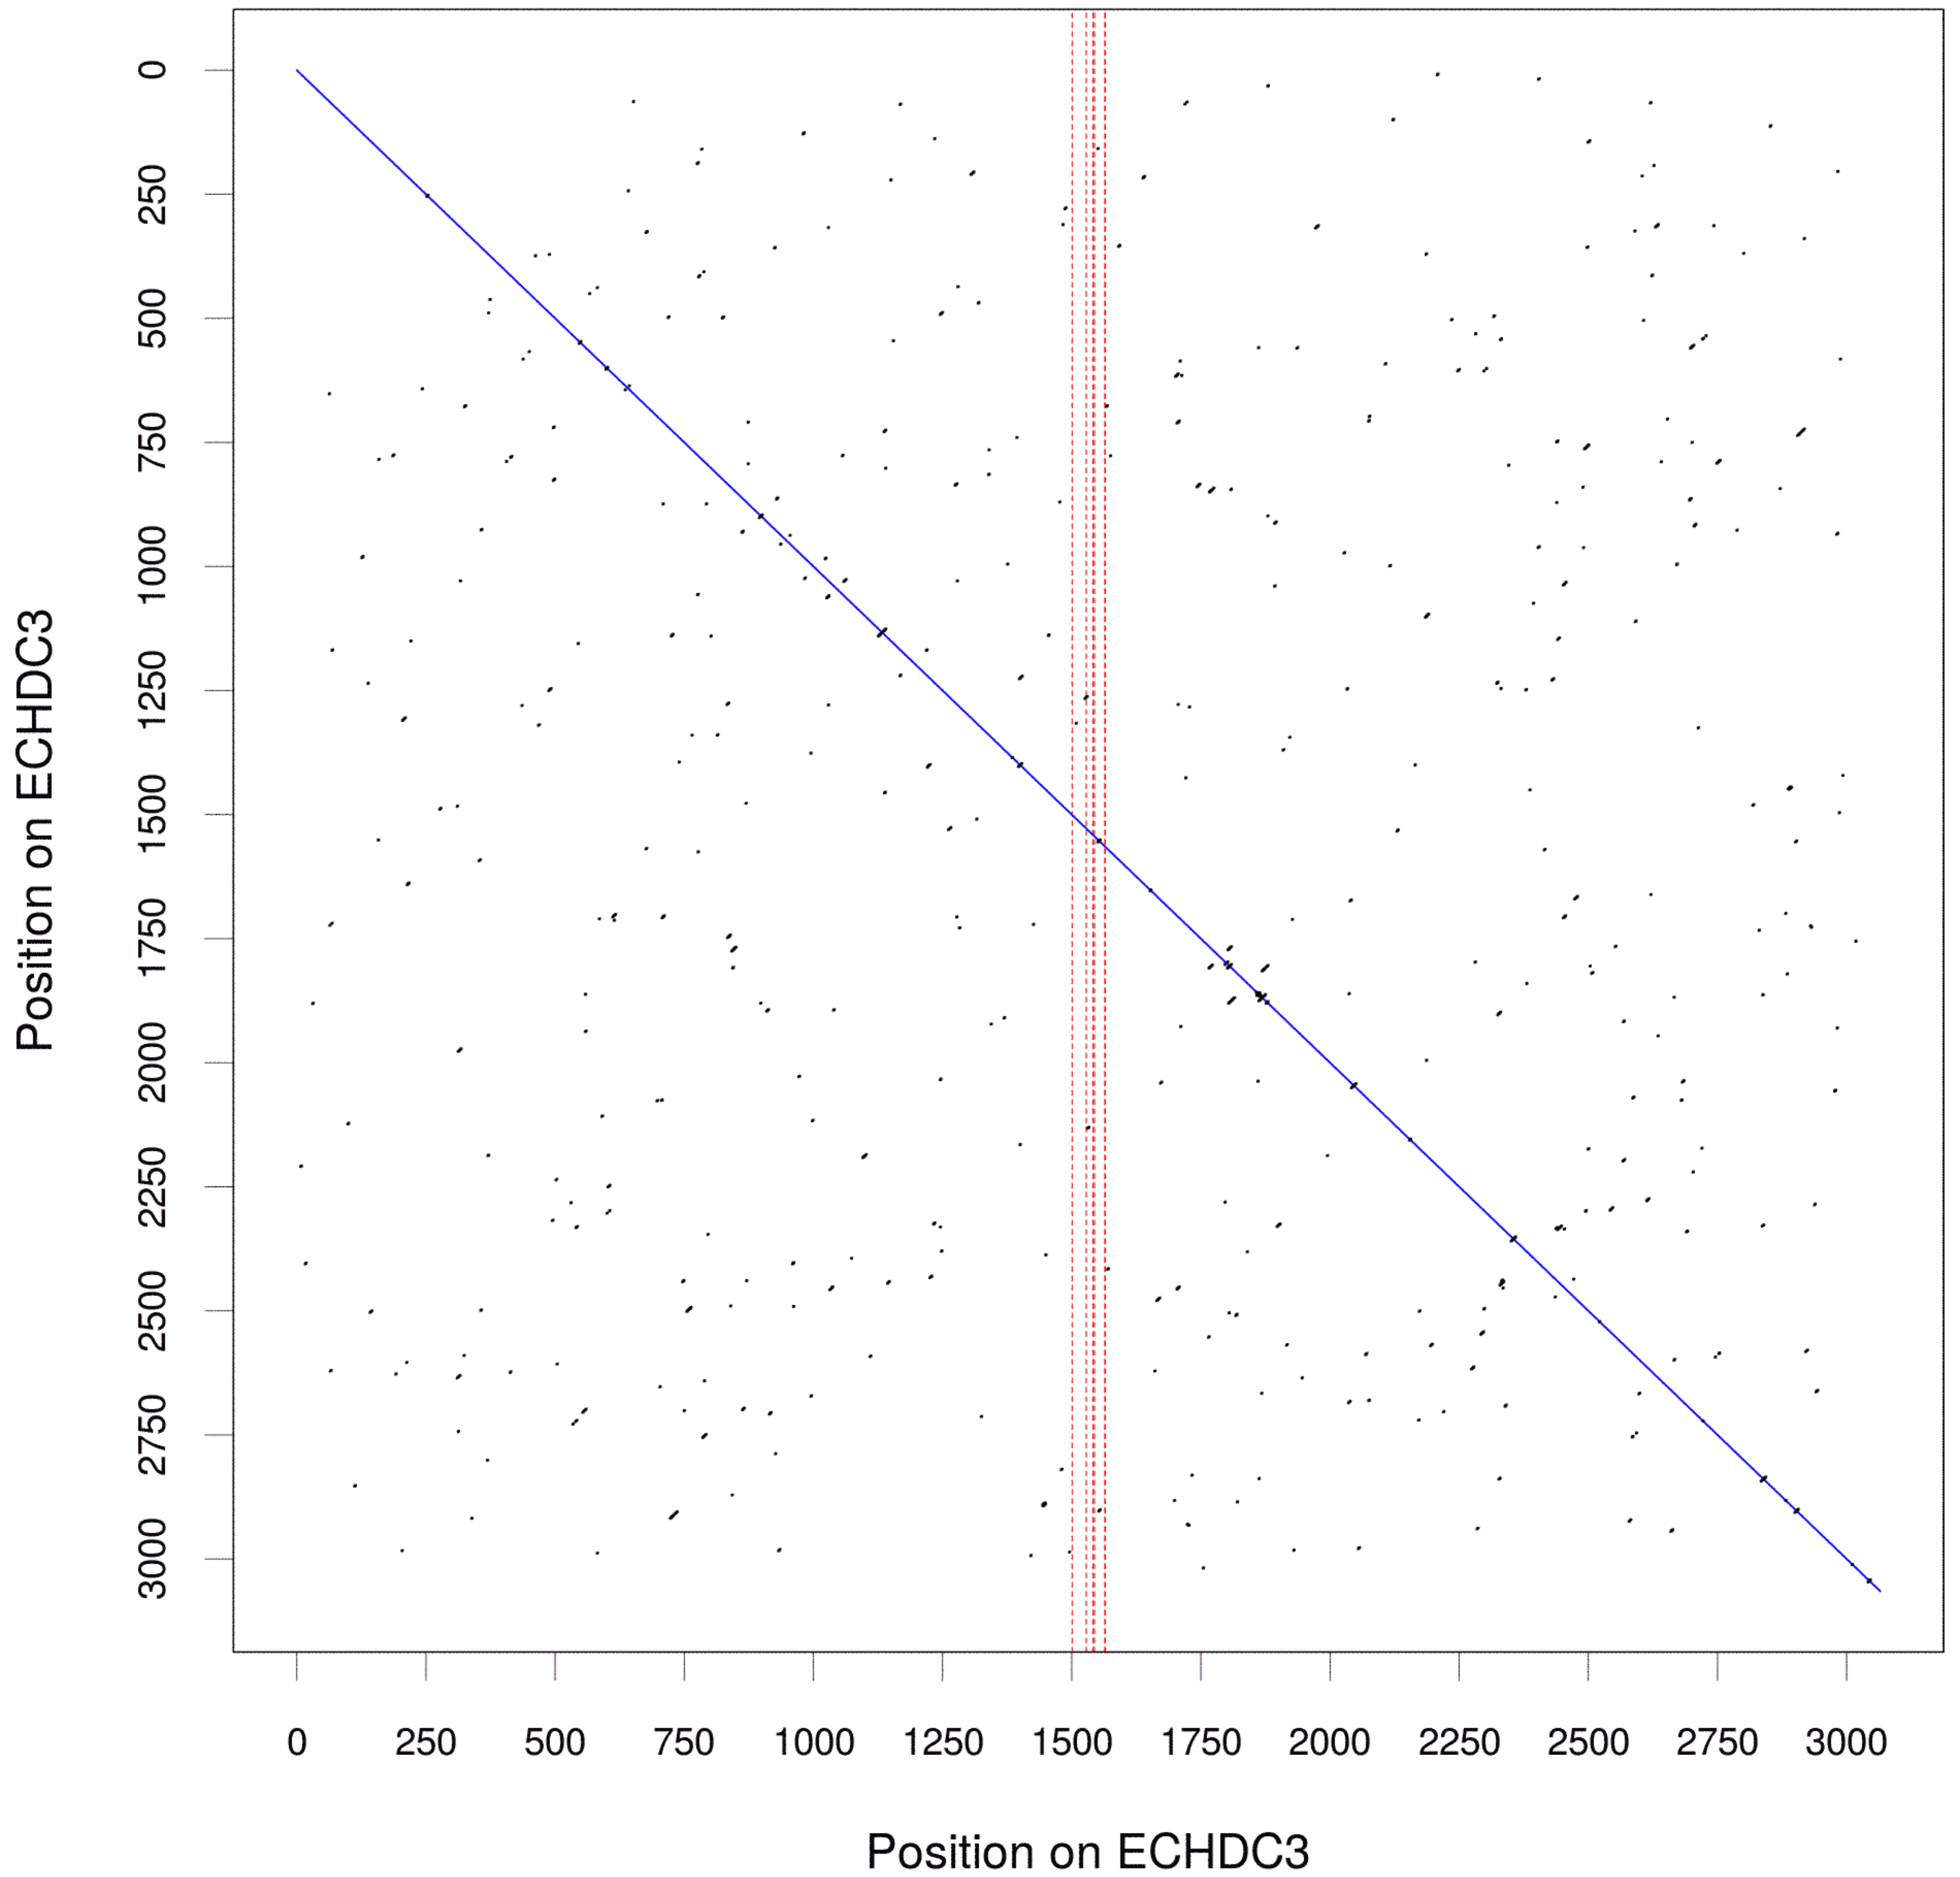

# EIF3M

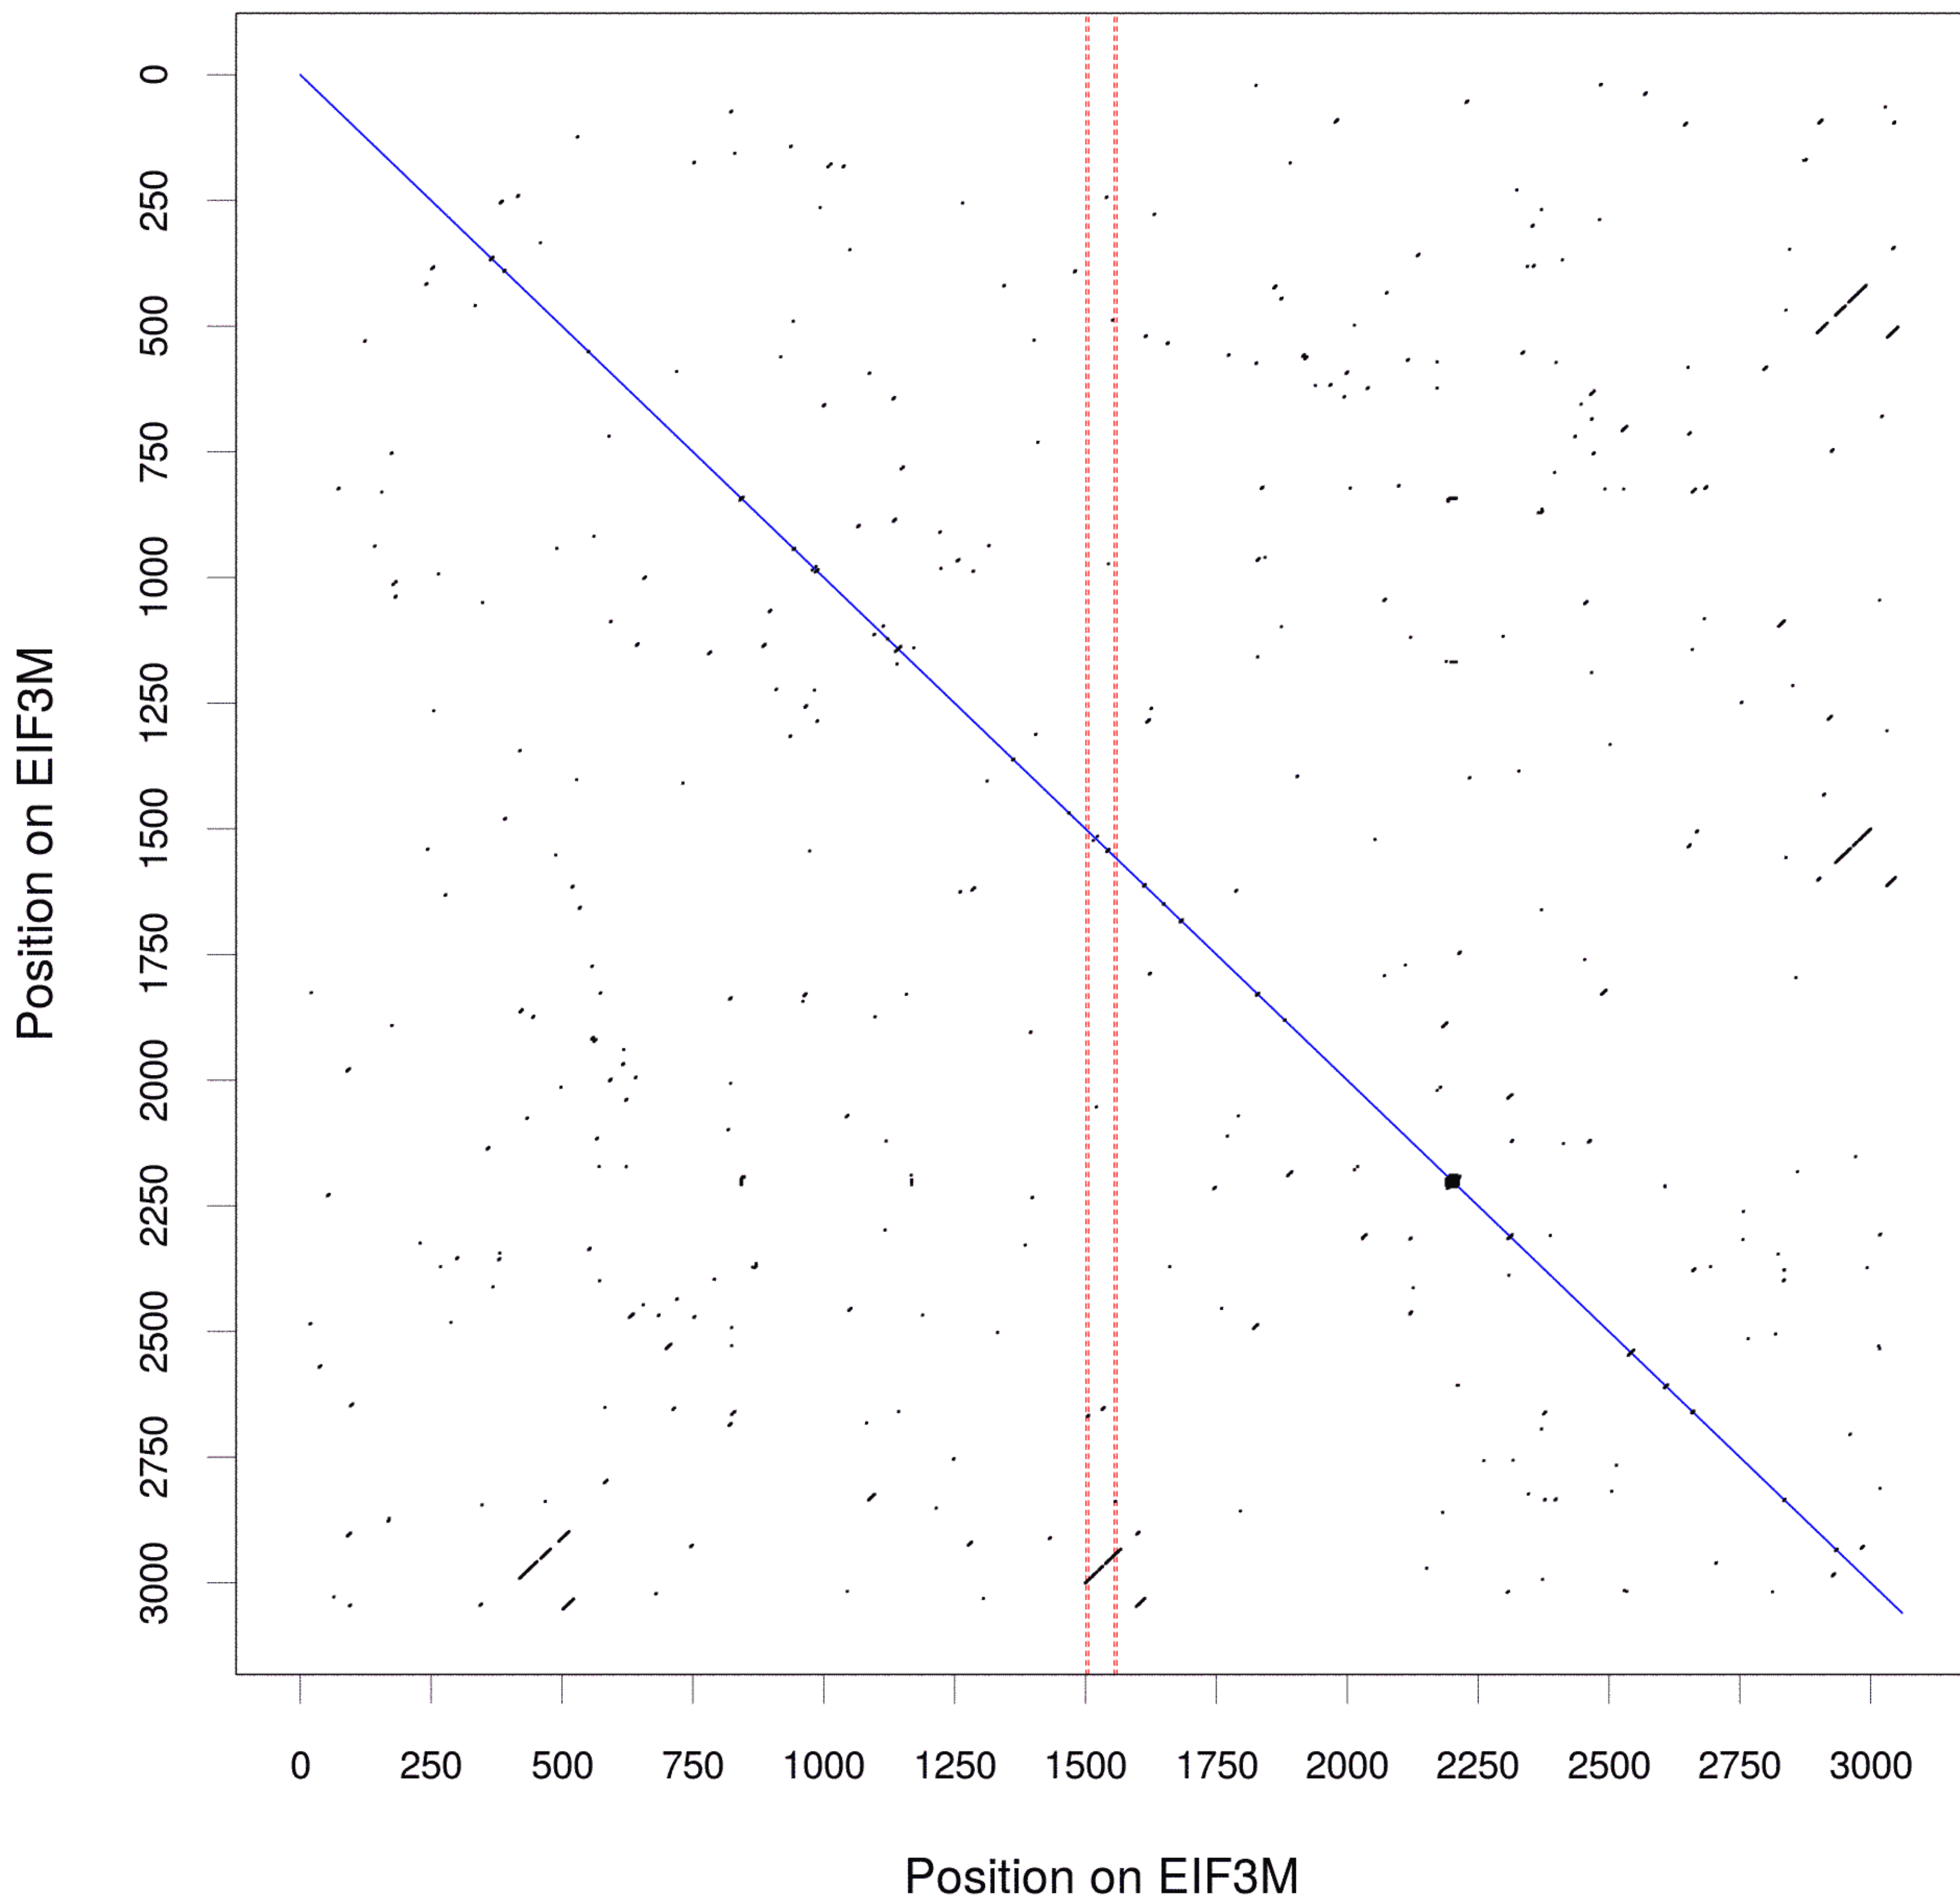

# ELF5

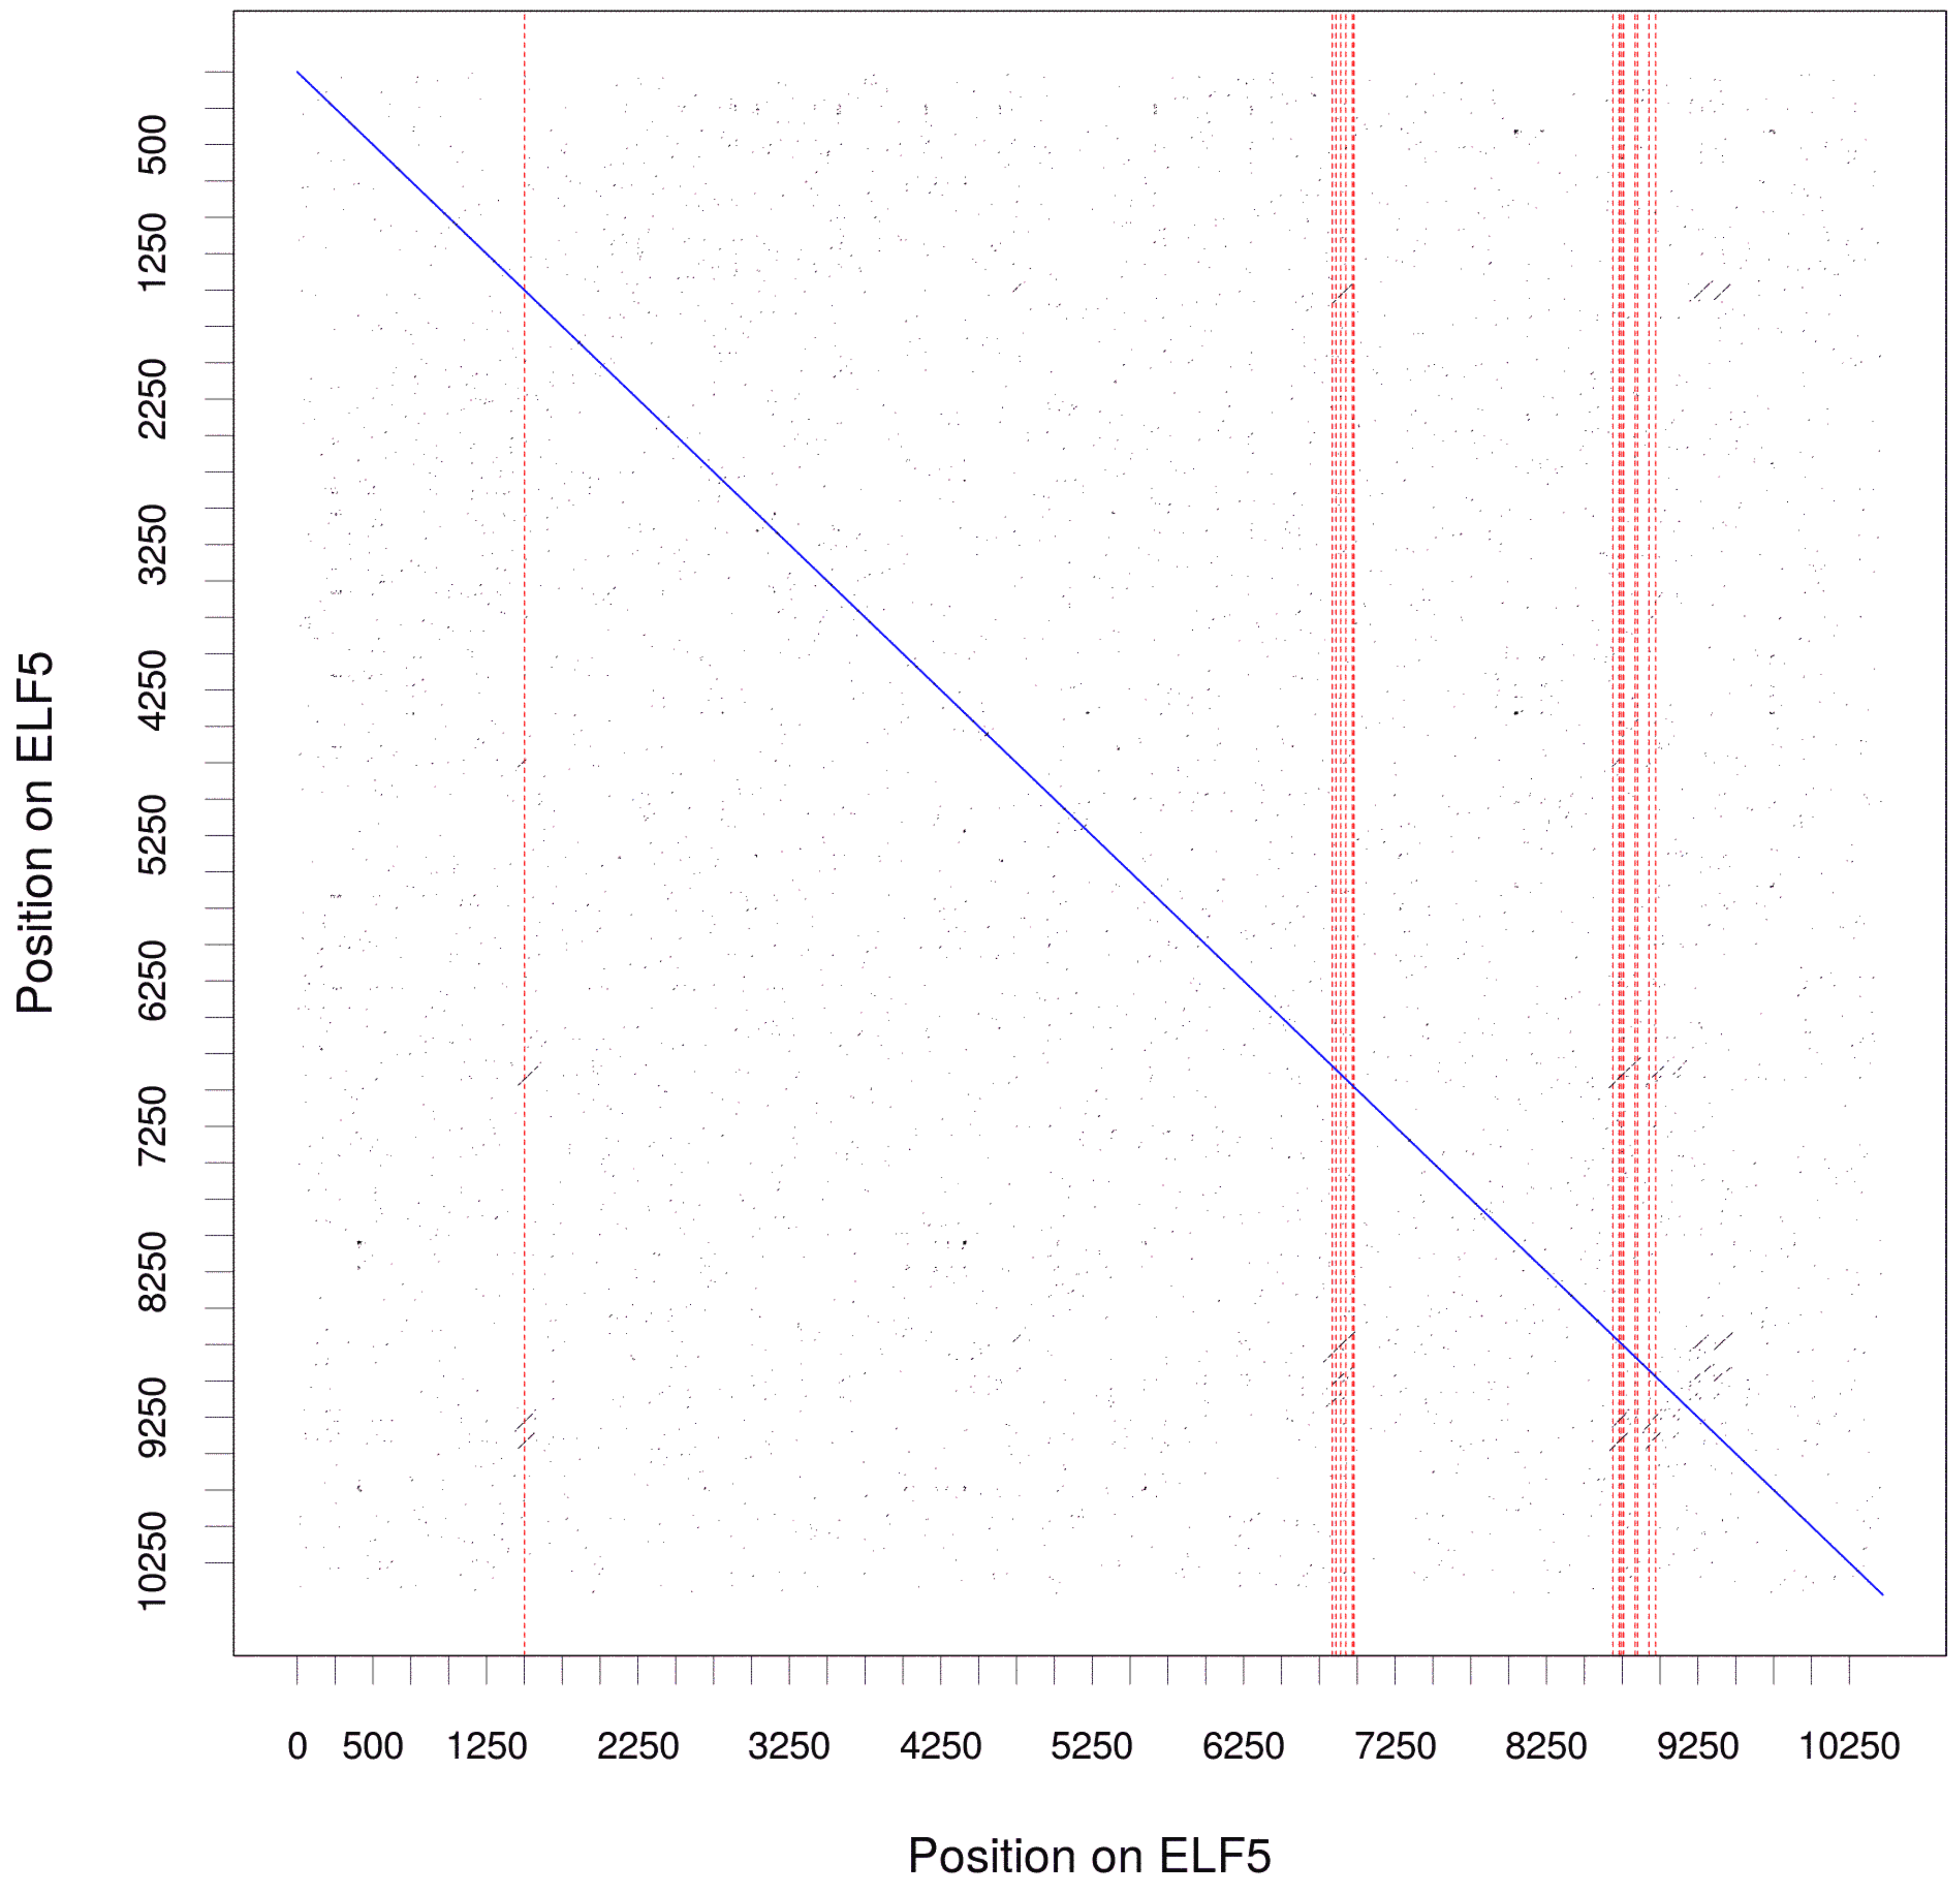

# ELMOD3

Position on ELMOD3

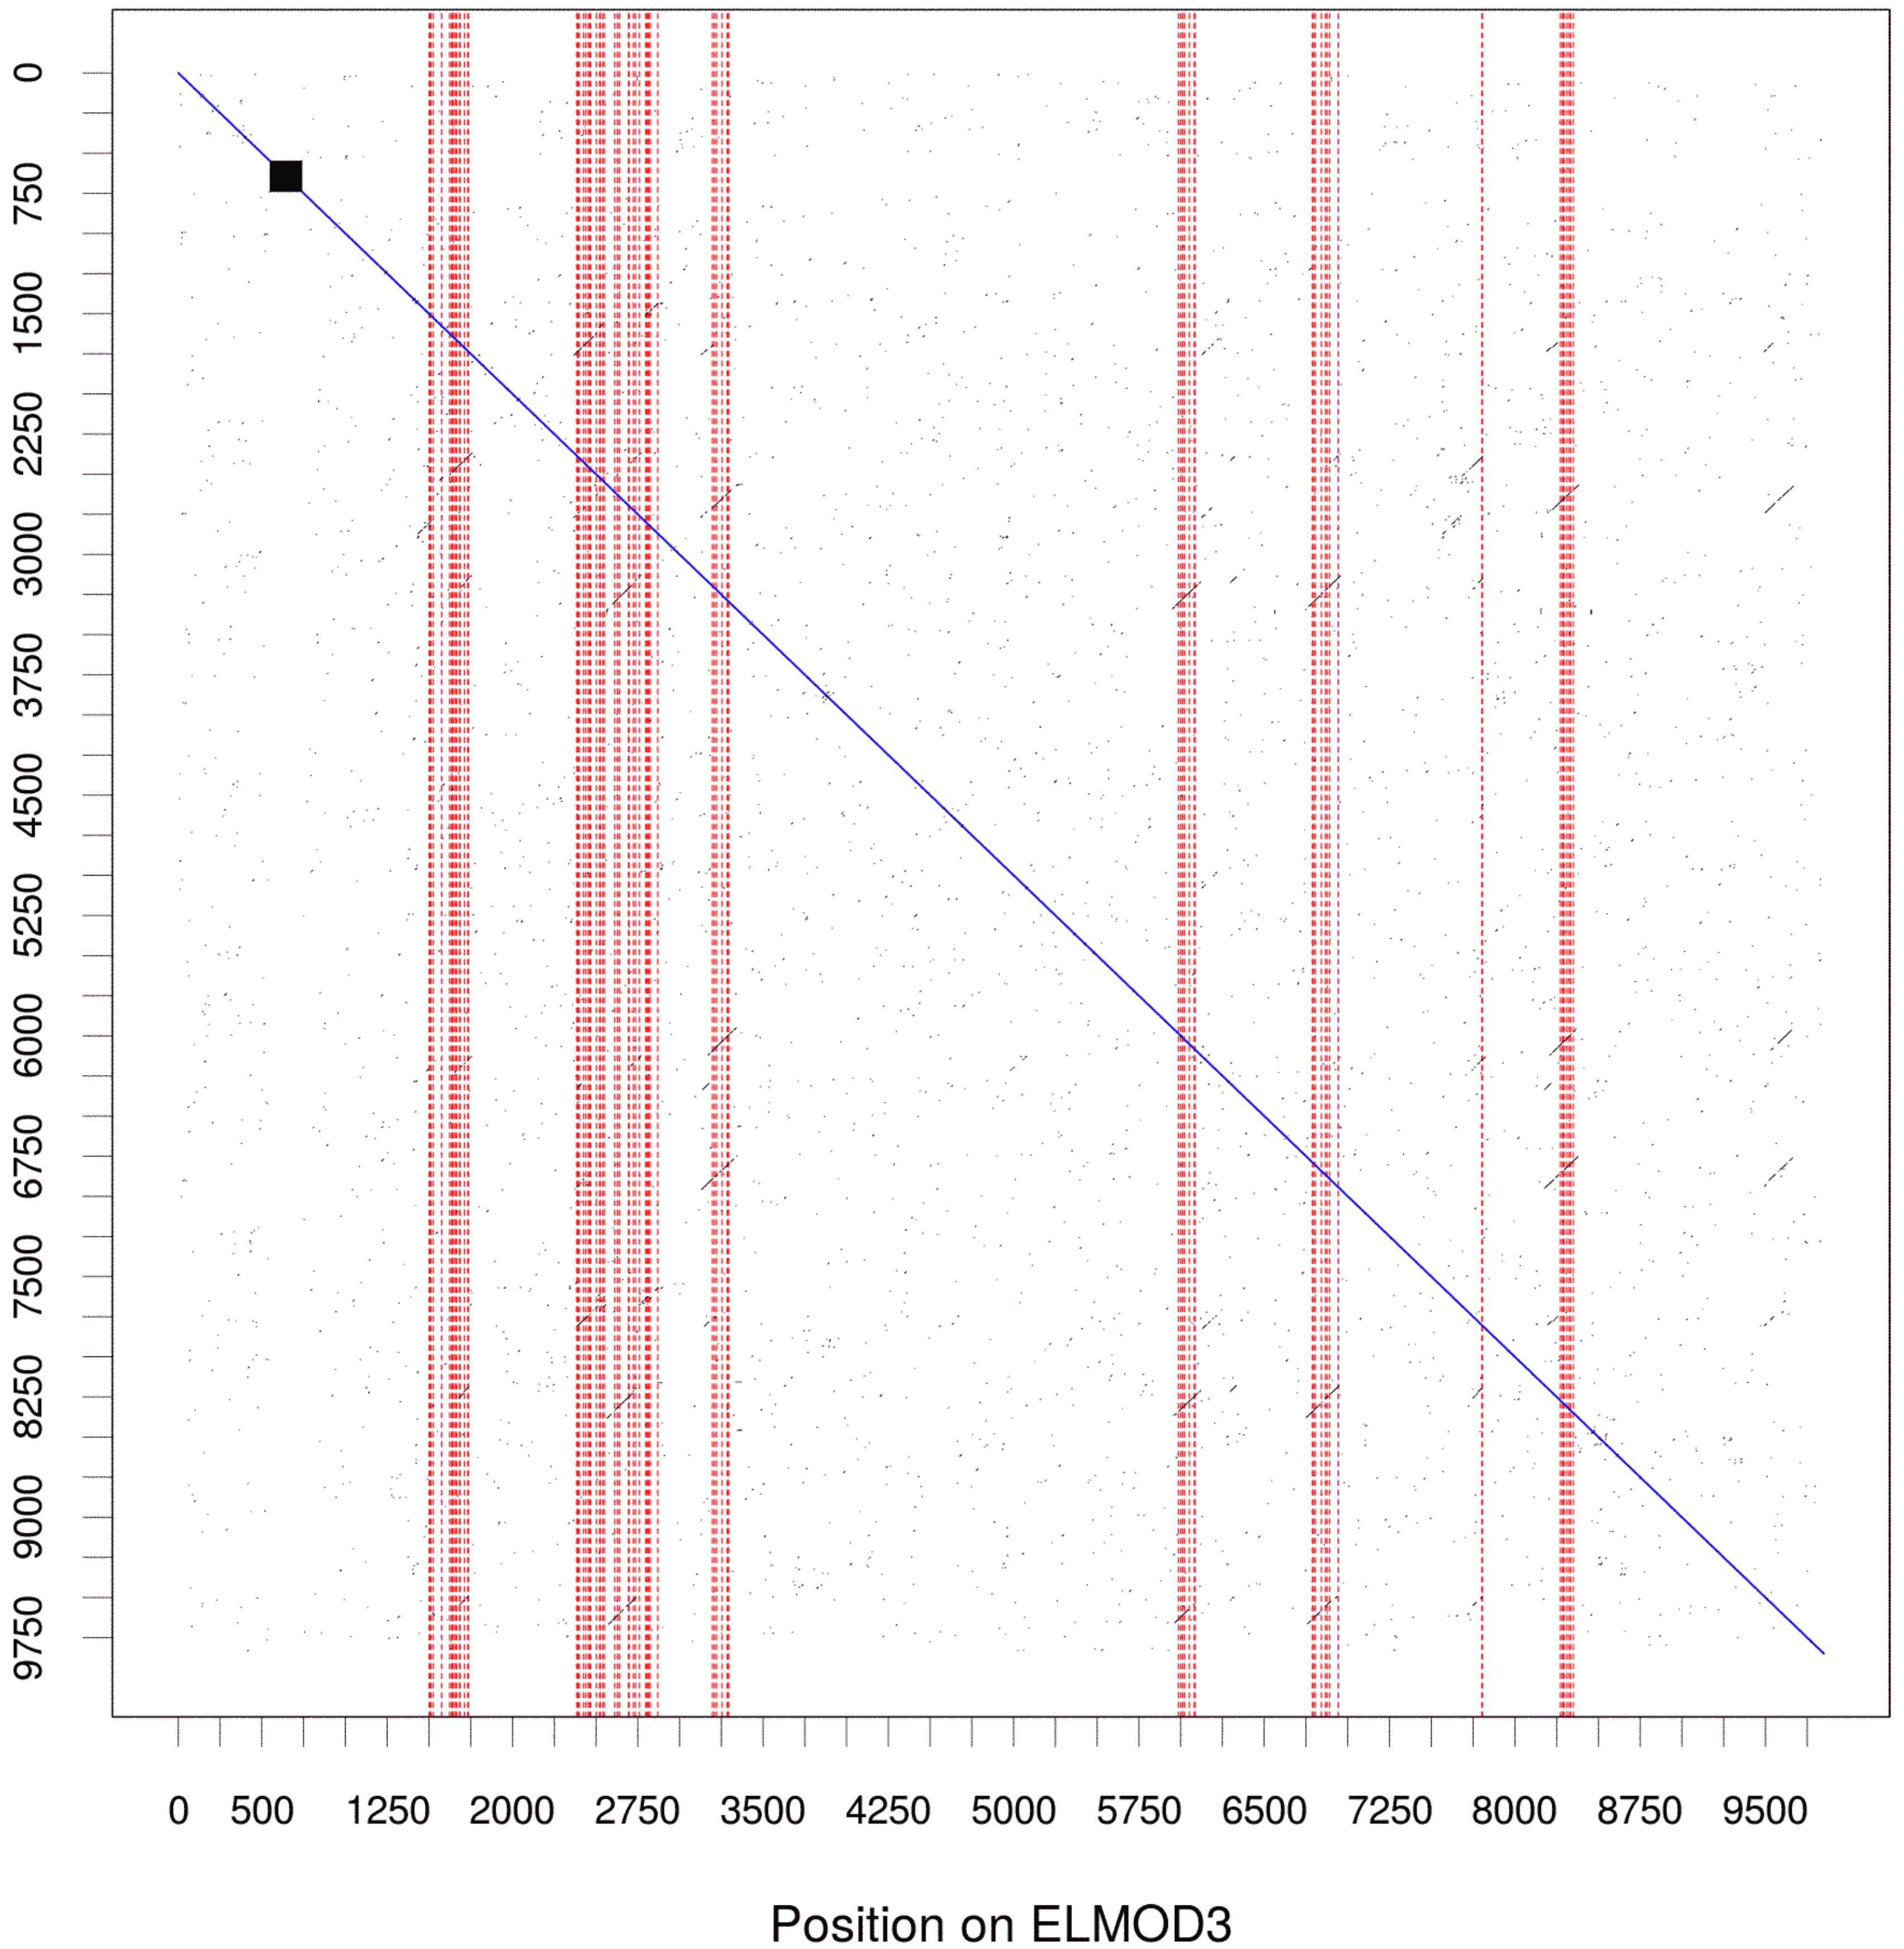

# ENO4

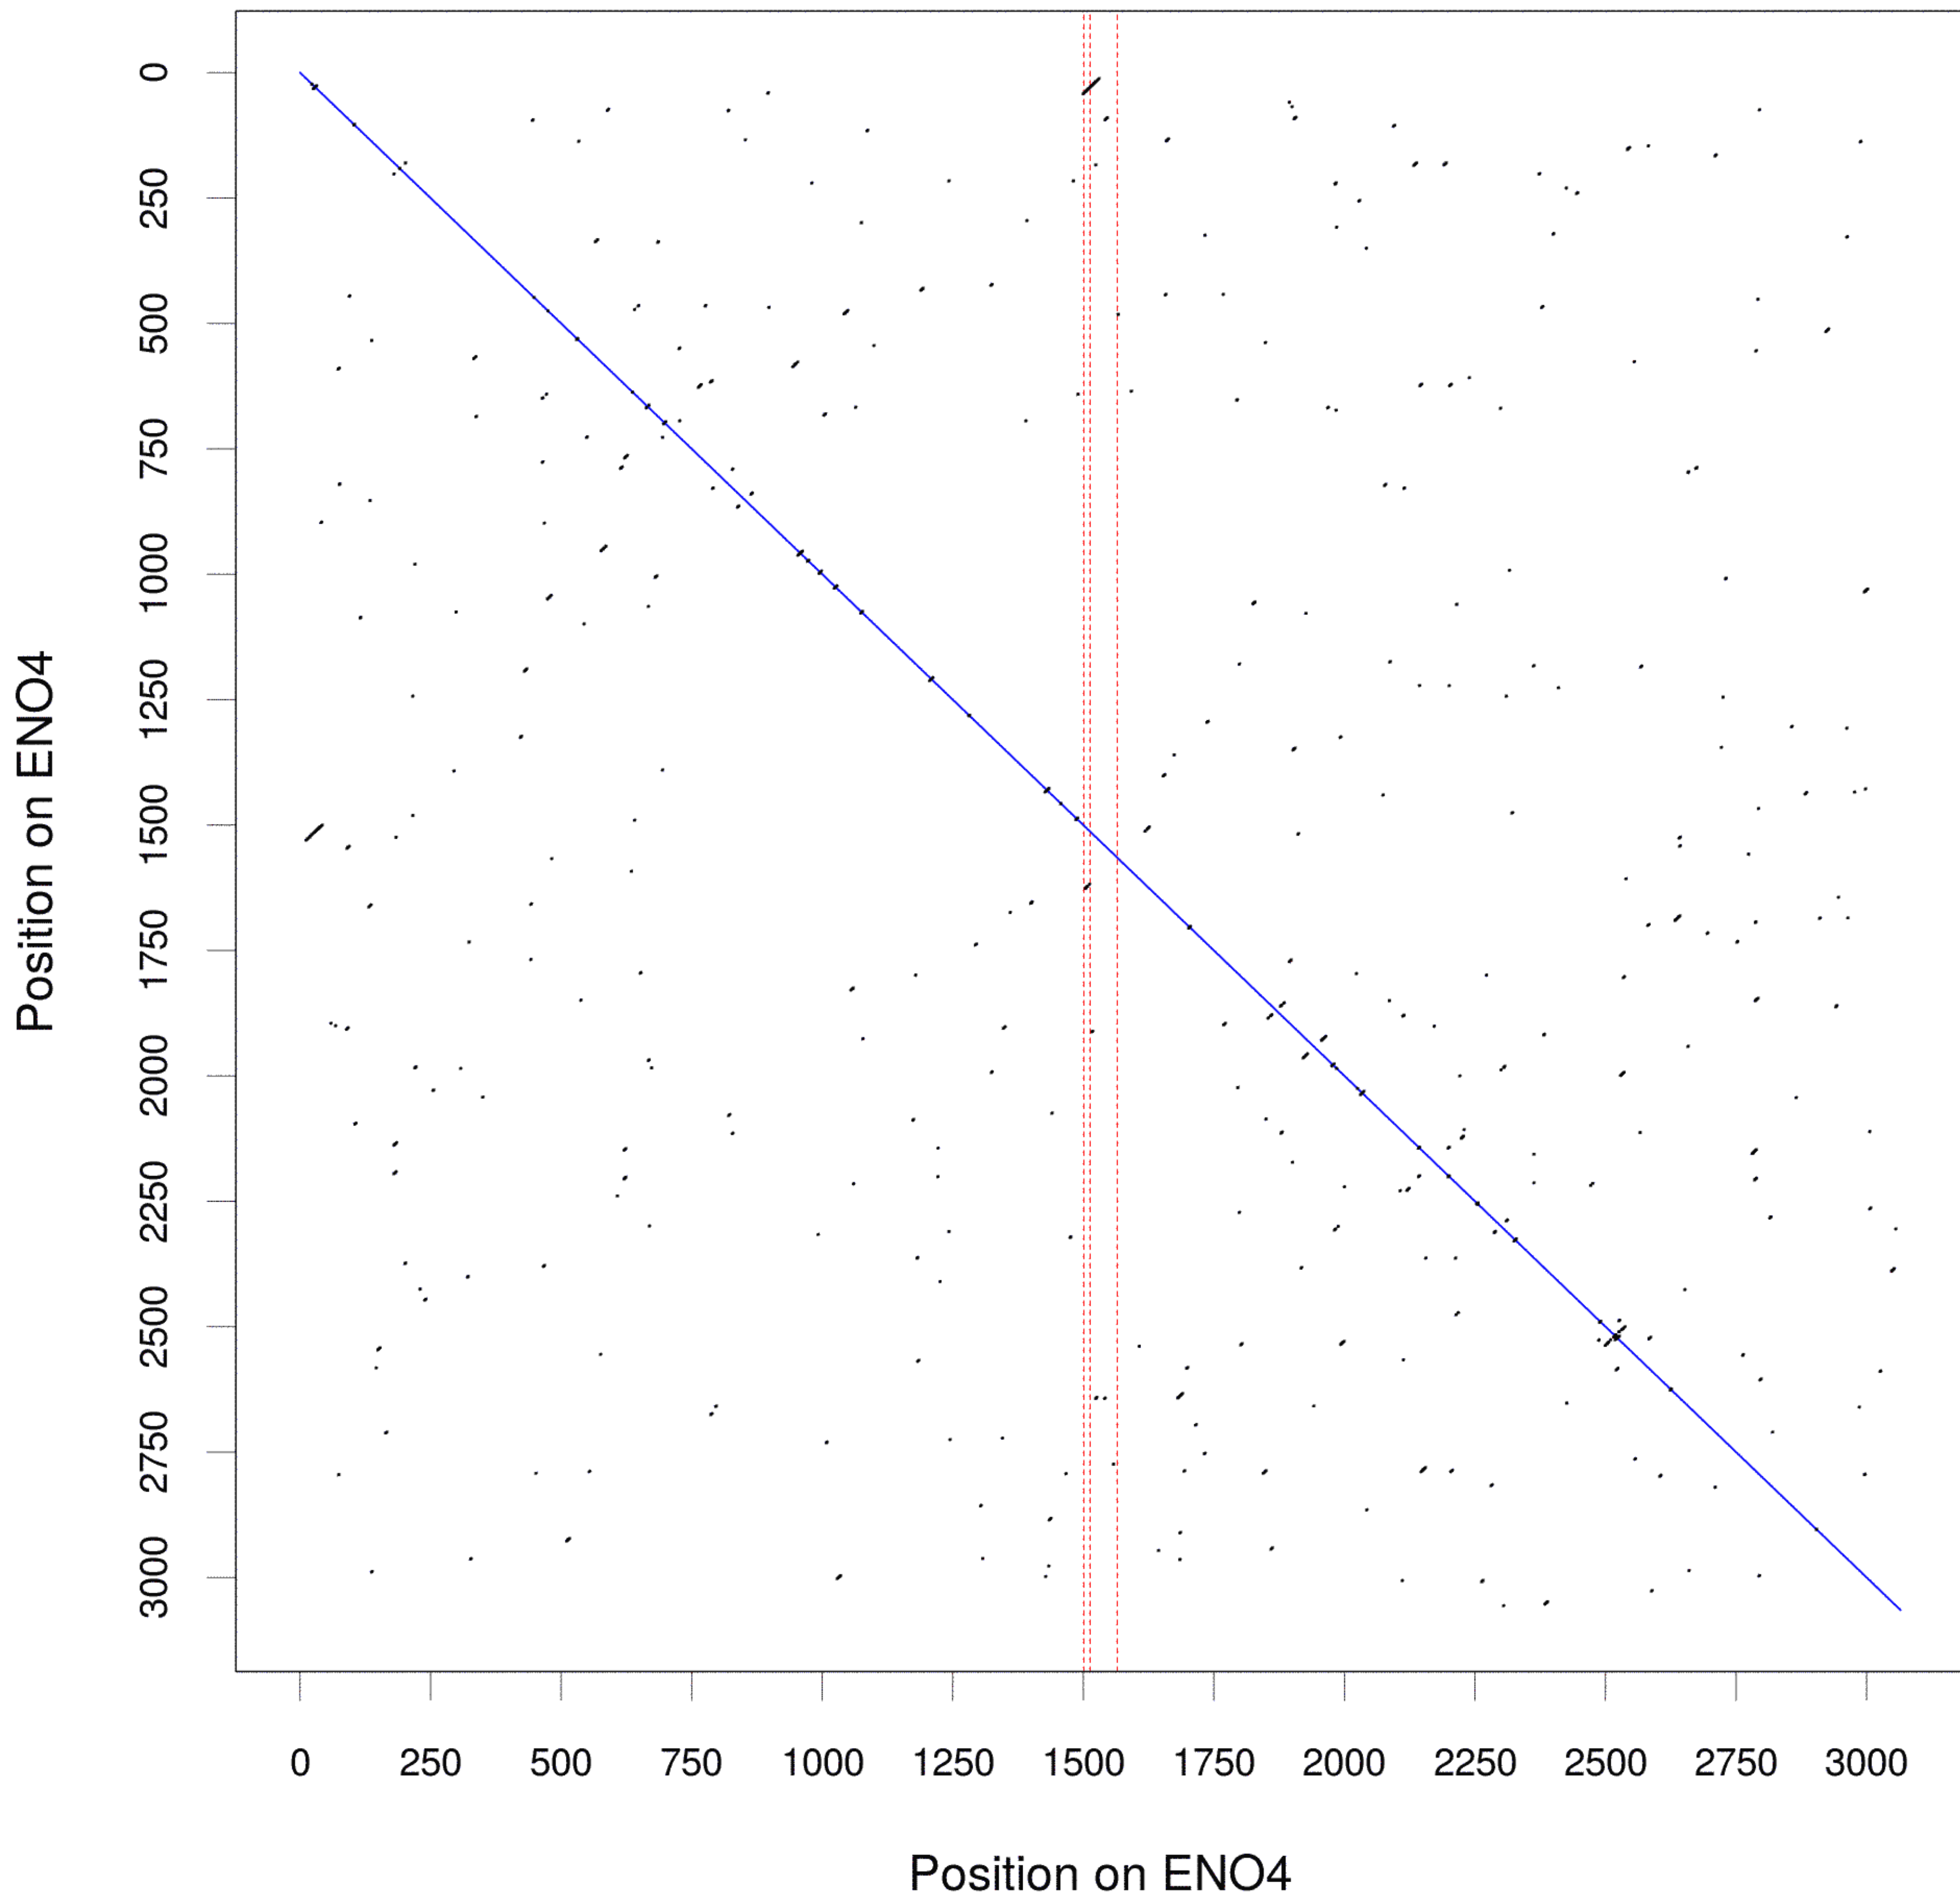

# ENSBTAG00000002633

Position on ENSBTAG00000002633

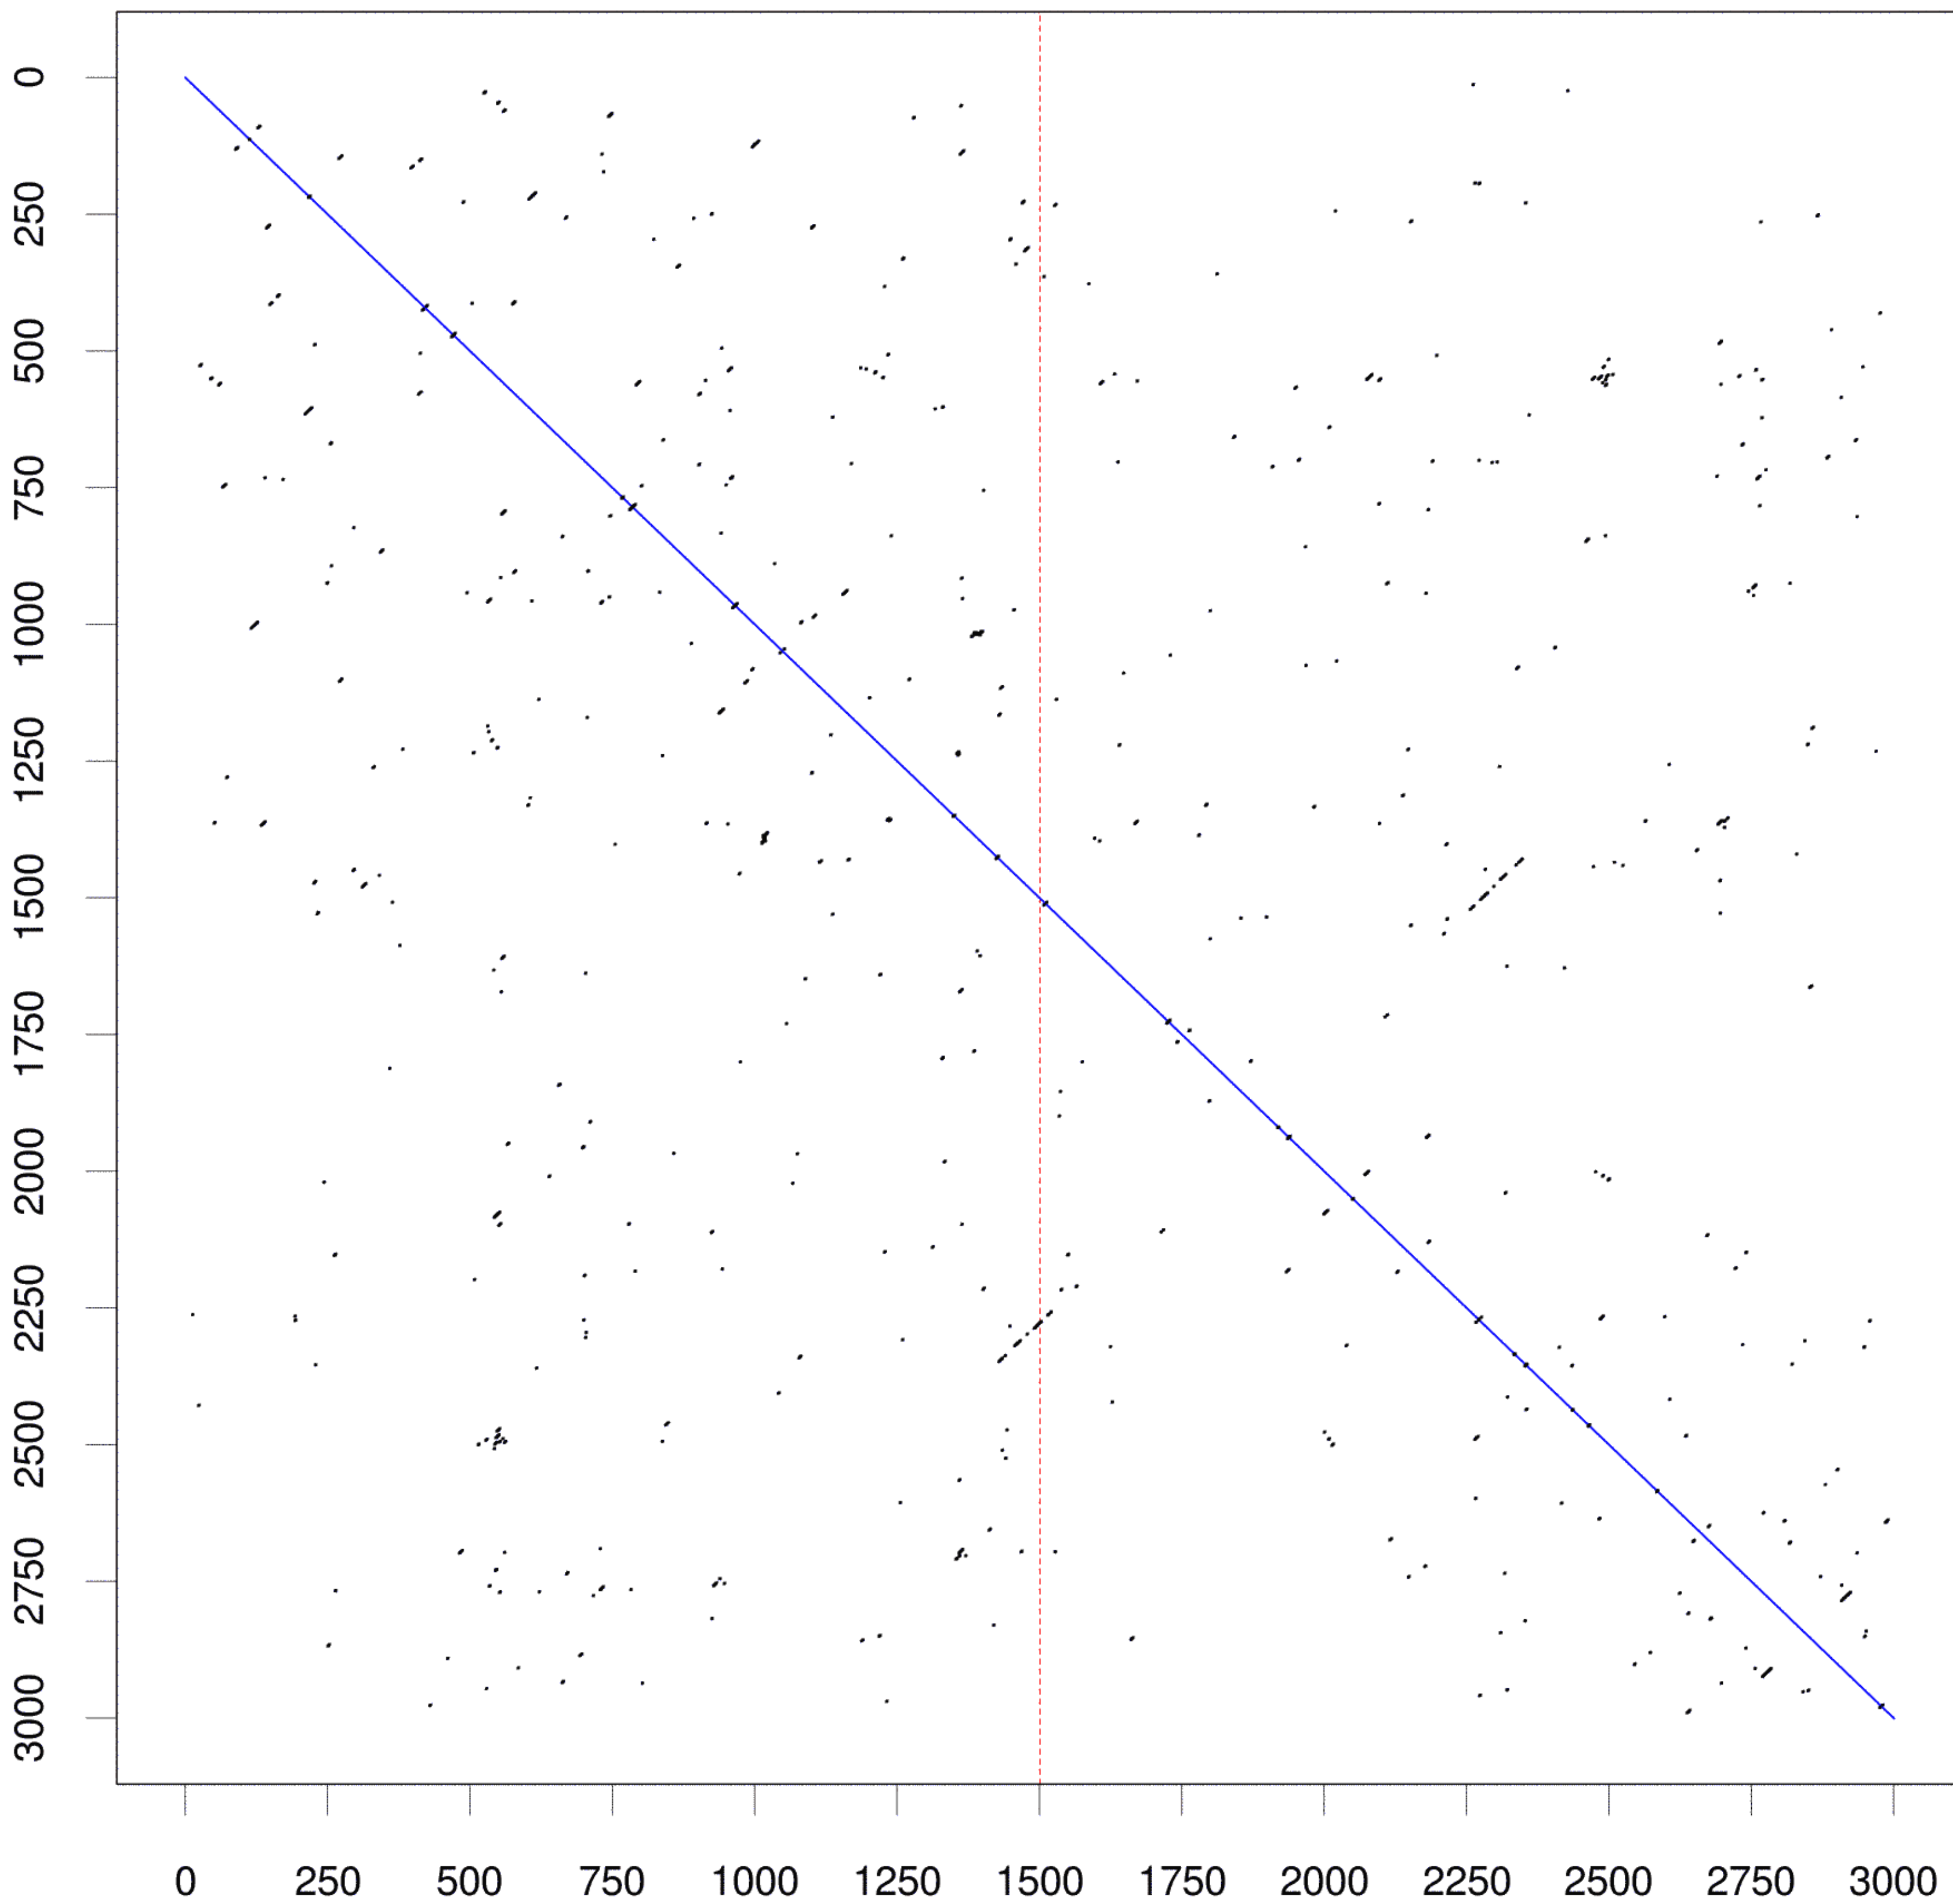

Position on ENSBTAG00000002633



# ENSBTAG00000016957

Position on ENSBTAG00000016957

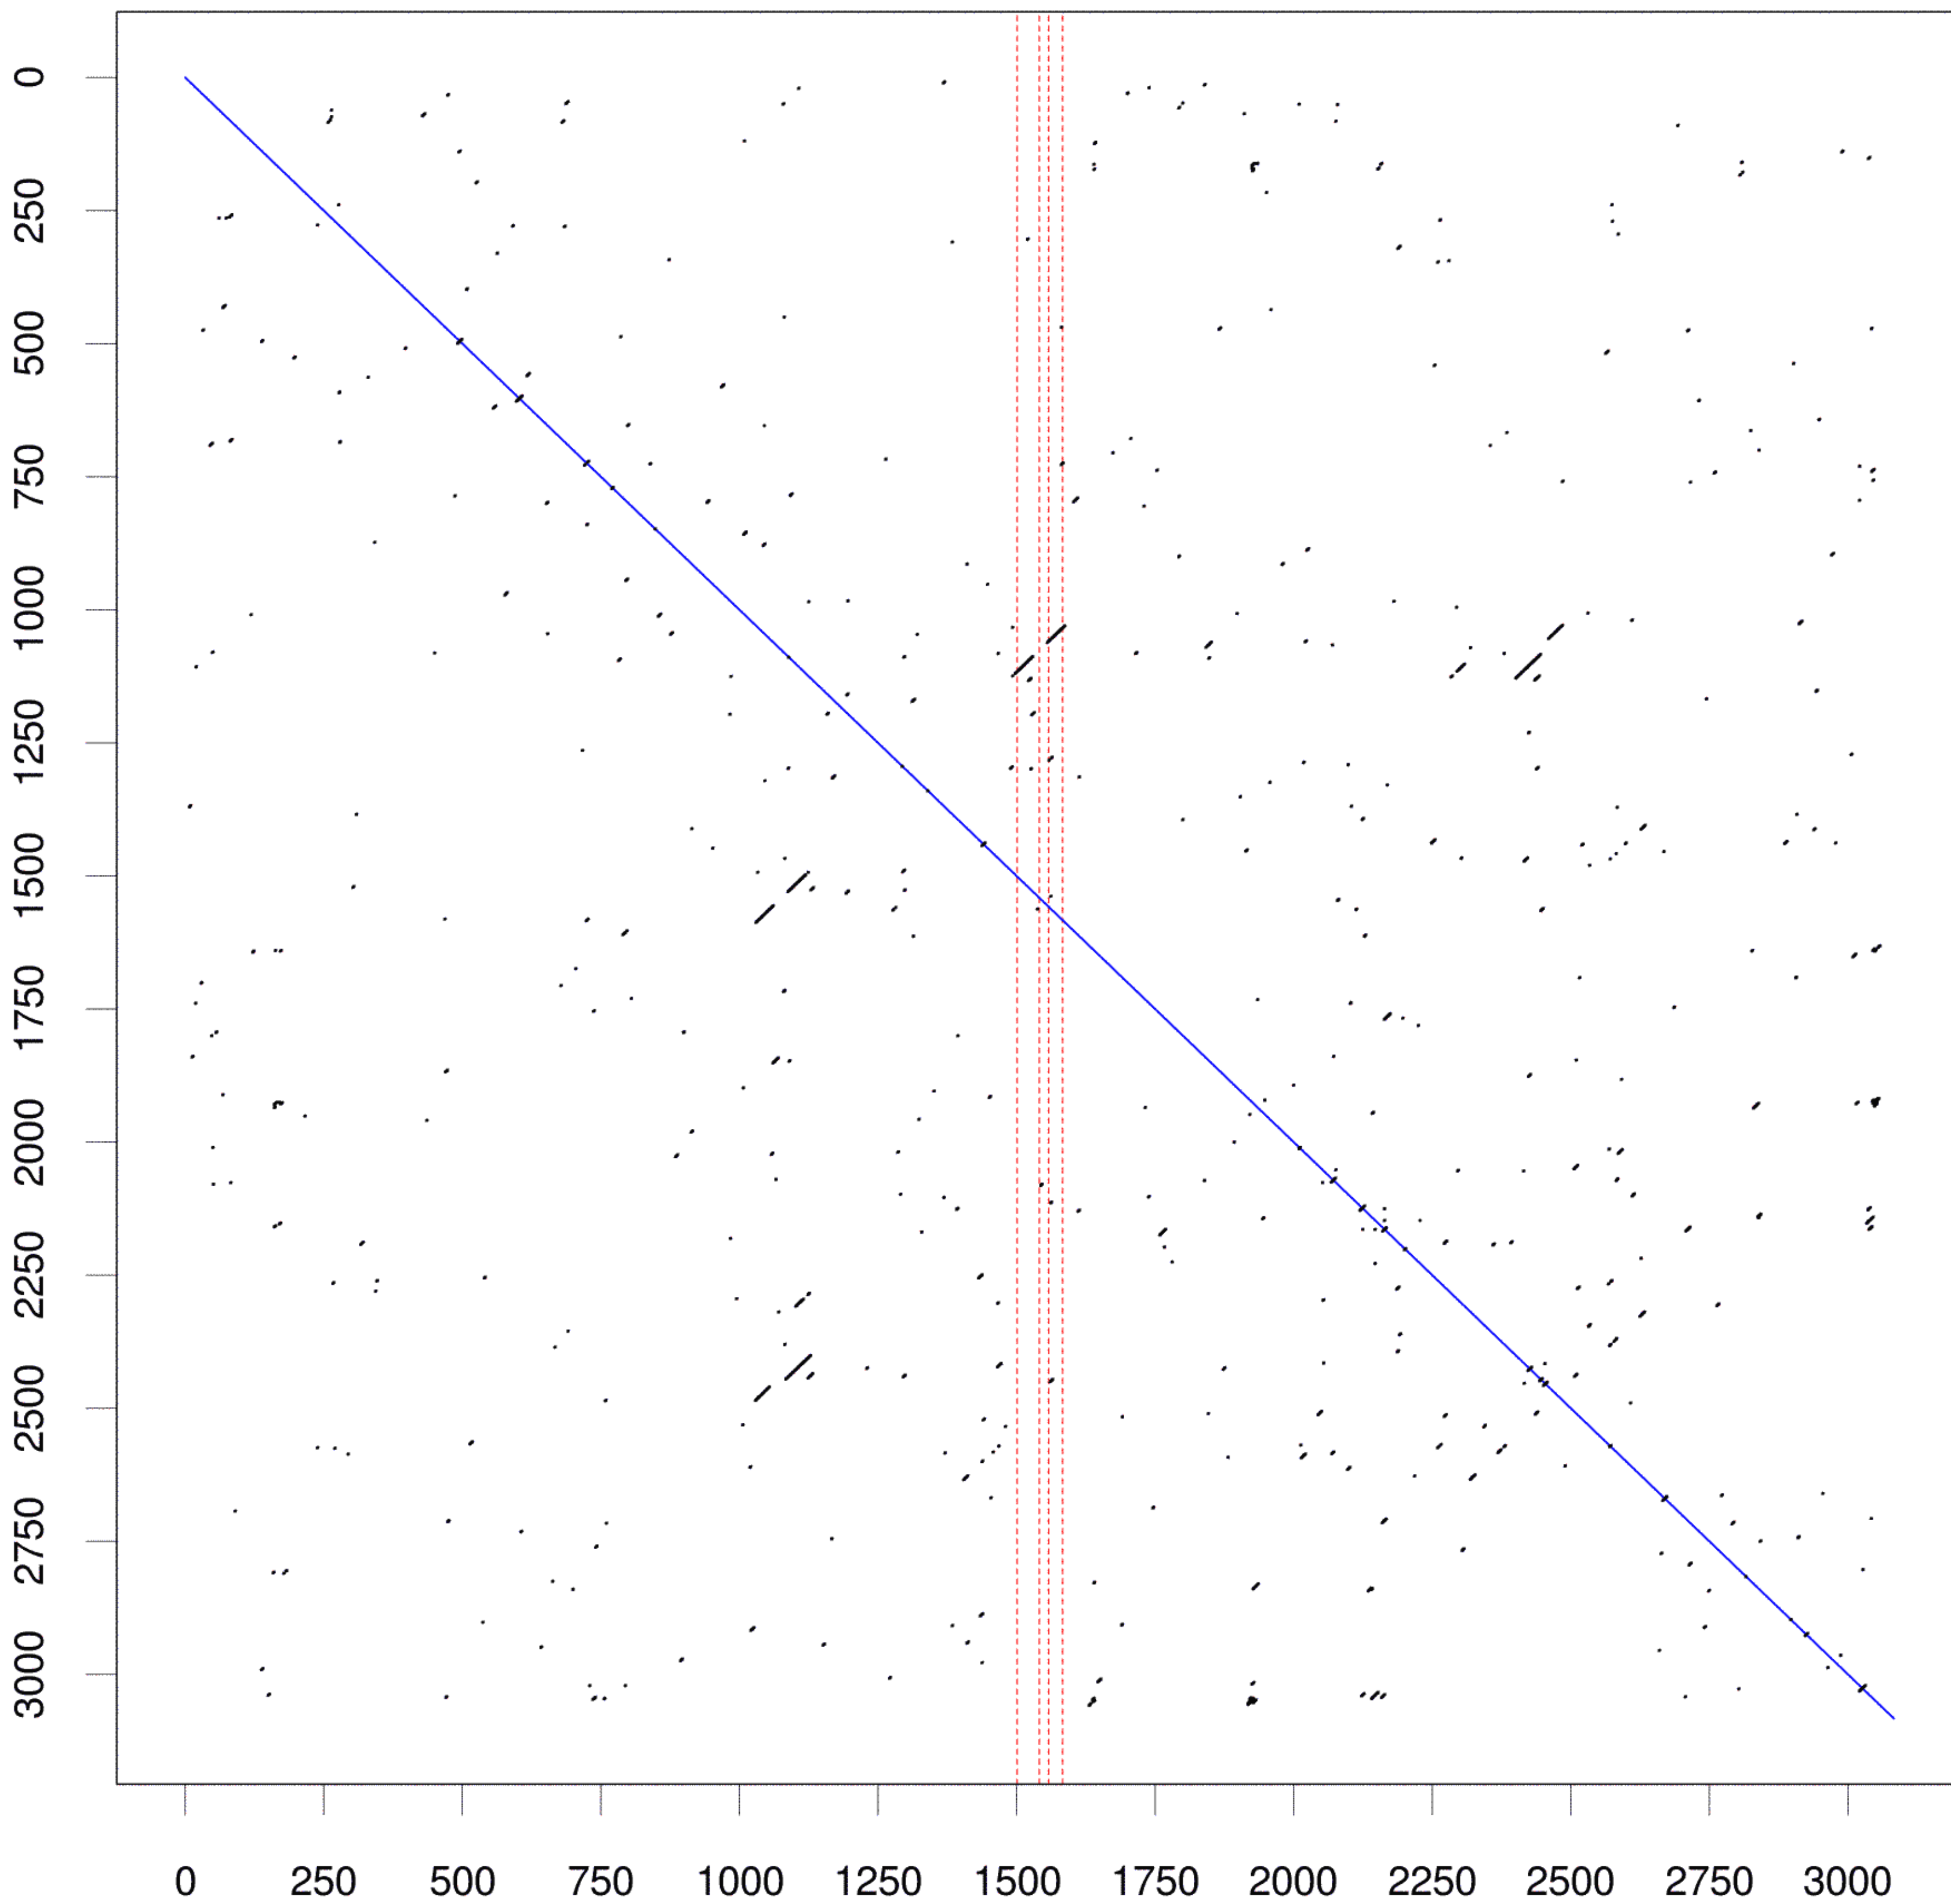

Position on ENSBTAG00000016957

# ENSBTAG00000018057

Position on ENSBTAG00000018057

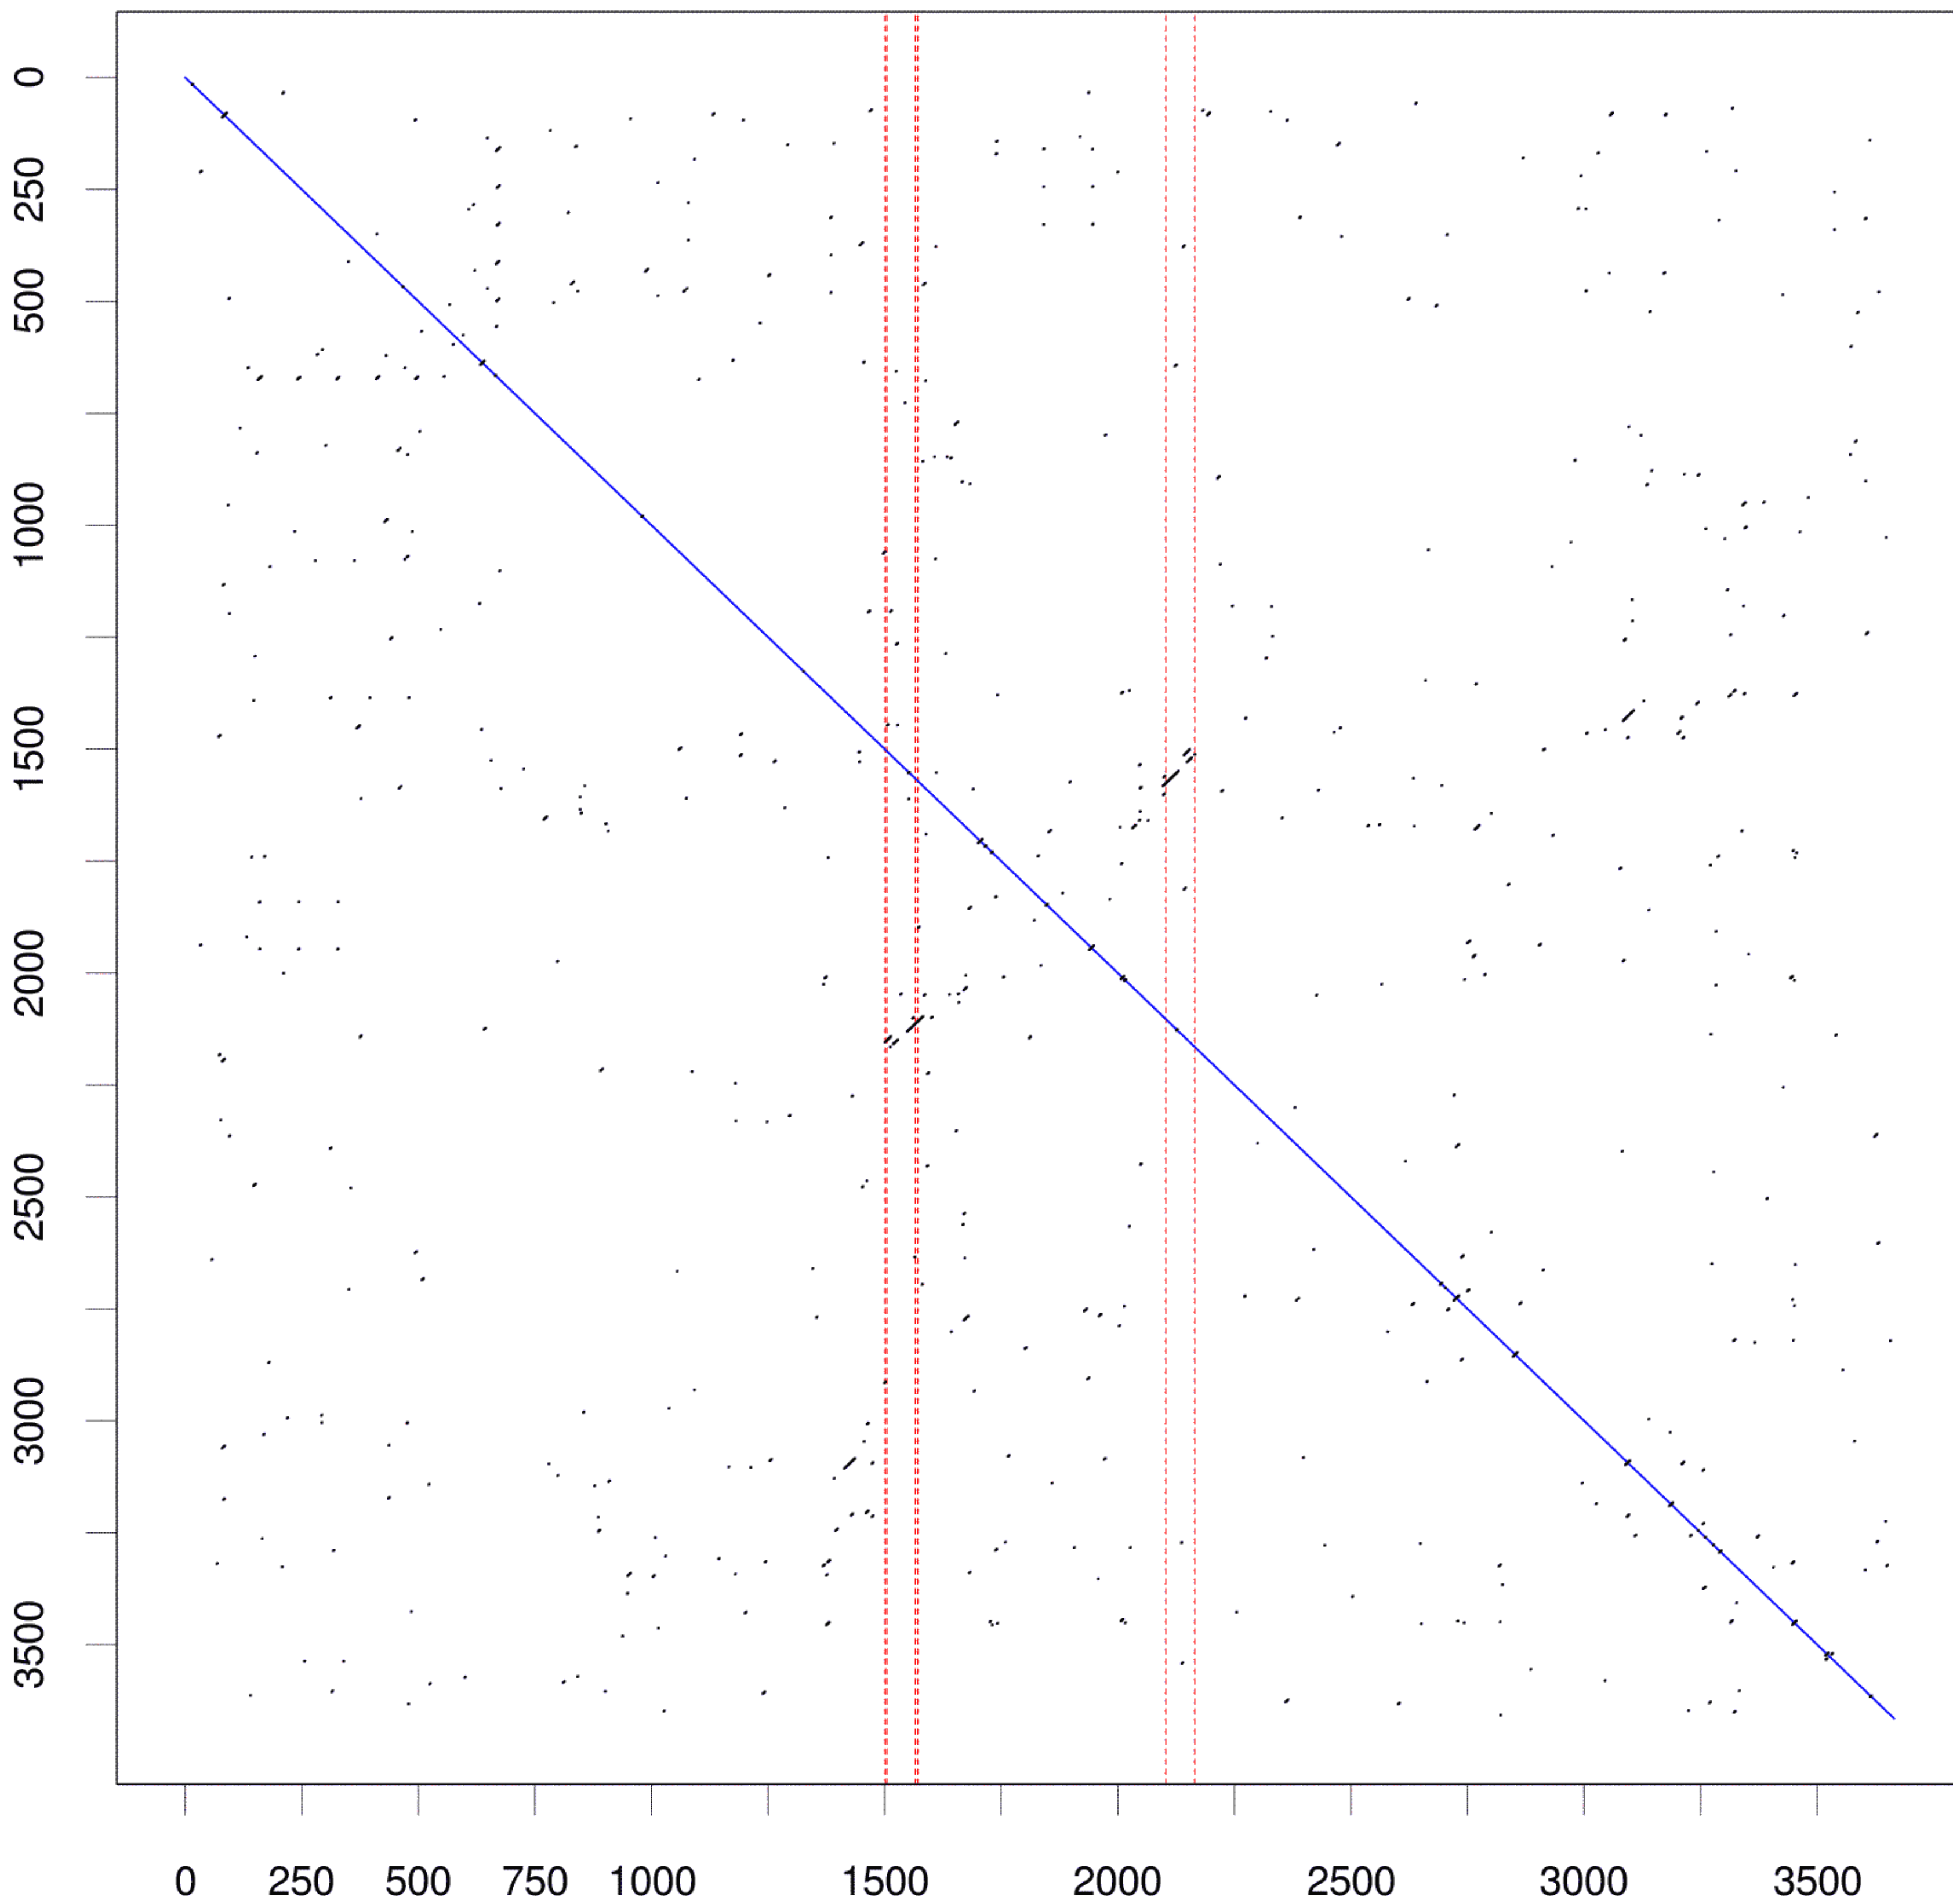

Position on ENSBTAG00000018057

# ENSBTAG00000023177

Position on ENSBTAG00000023177

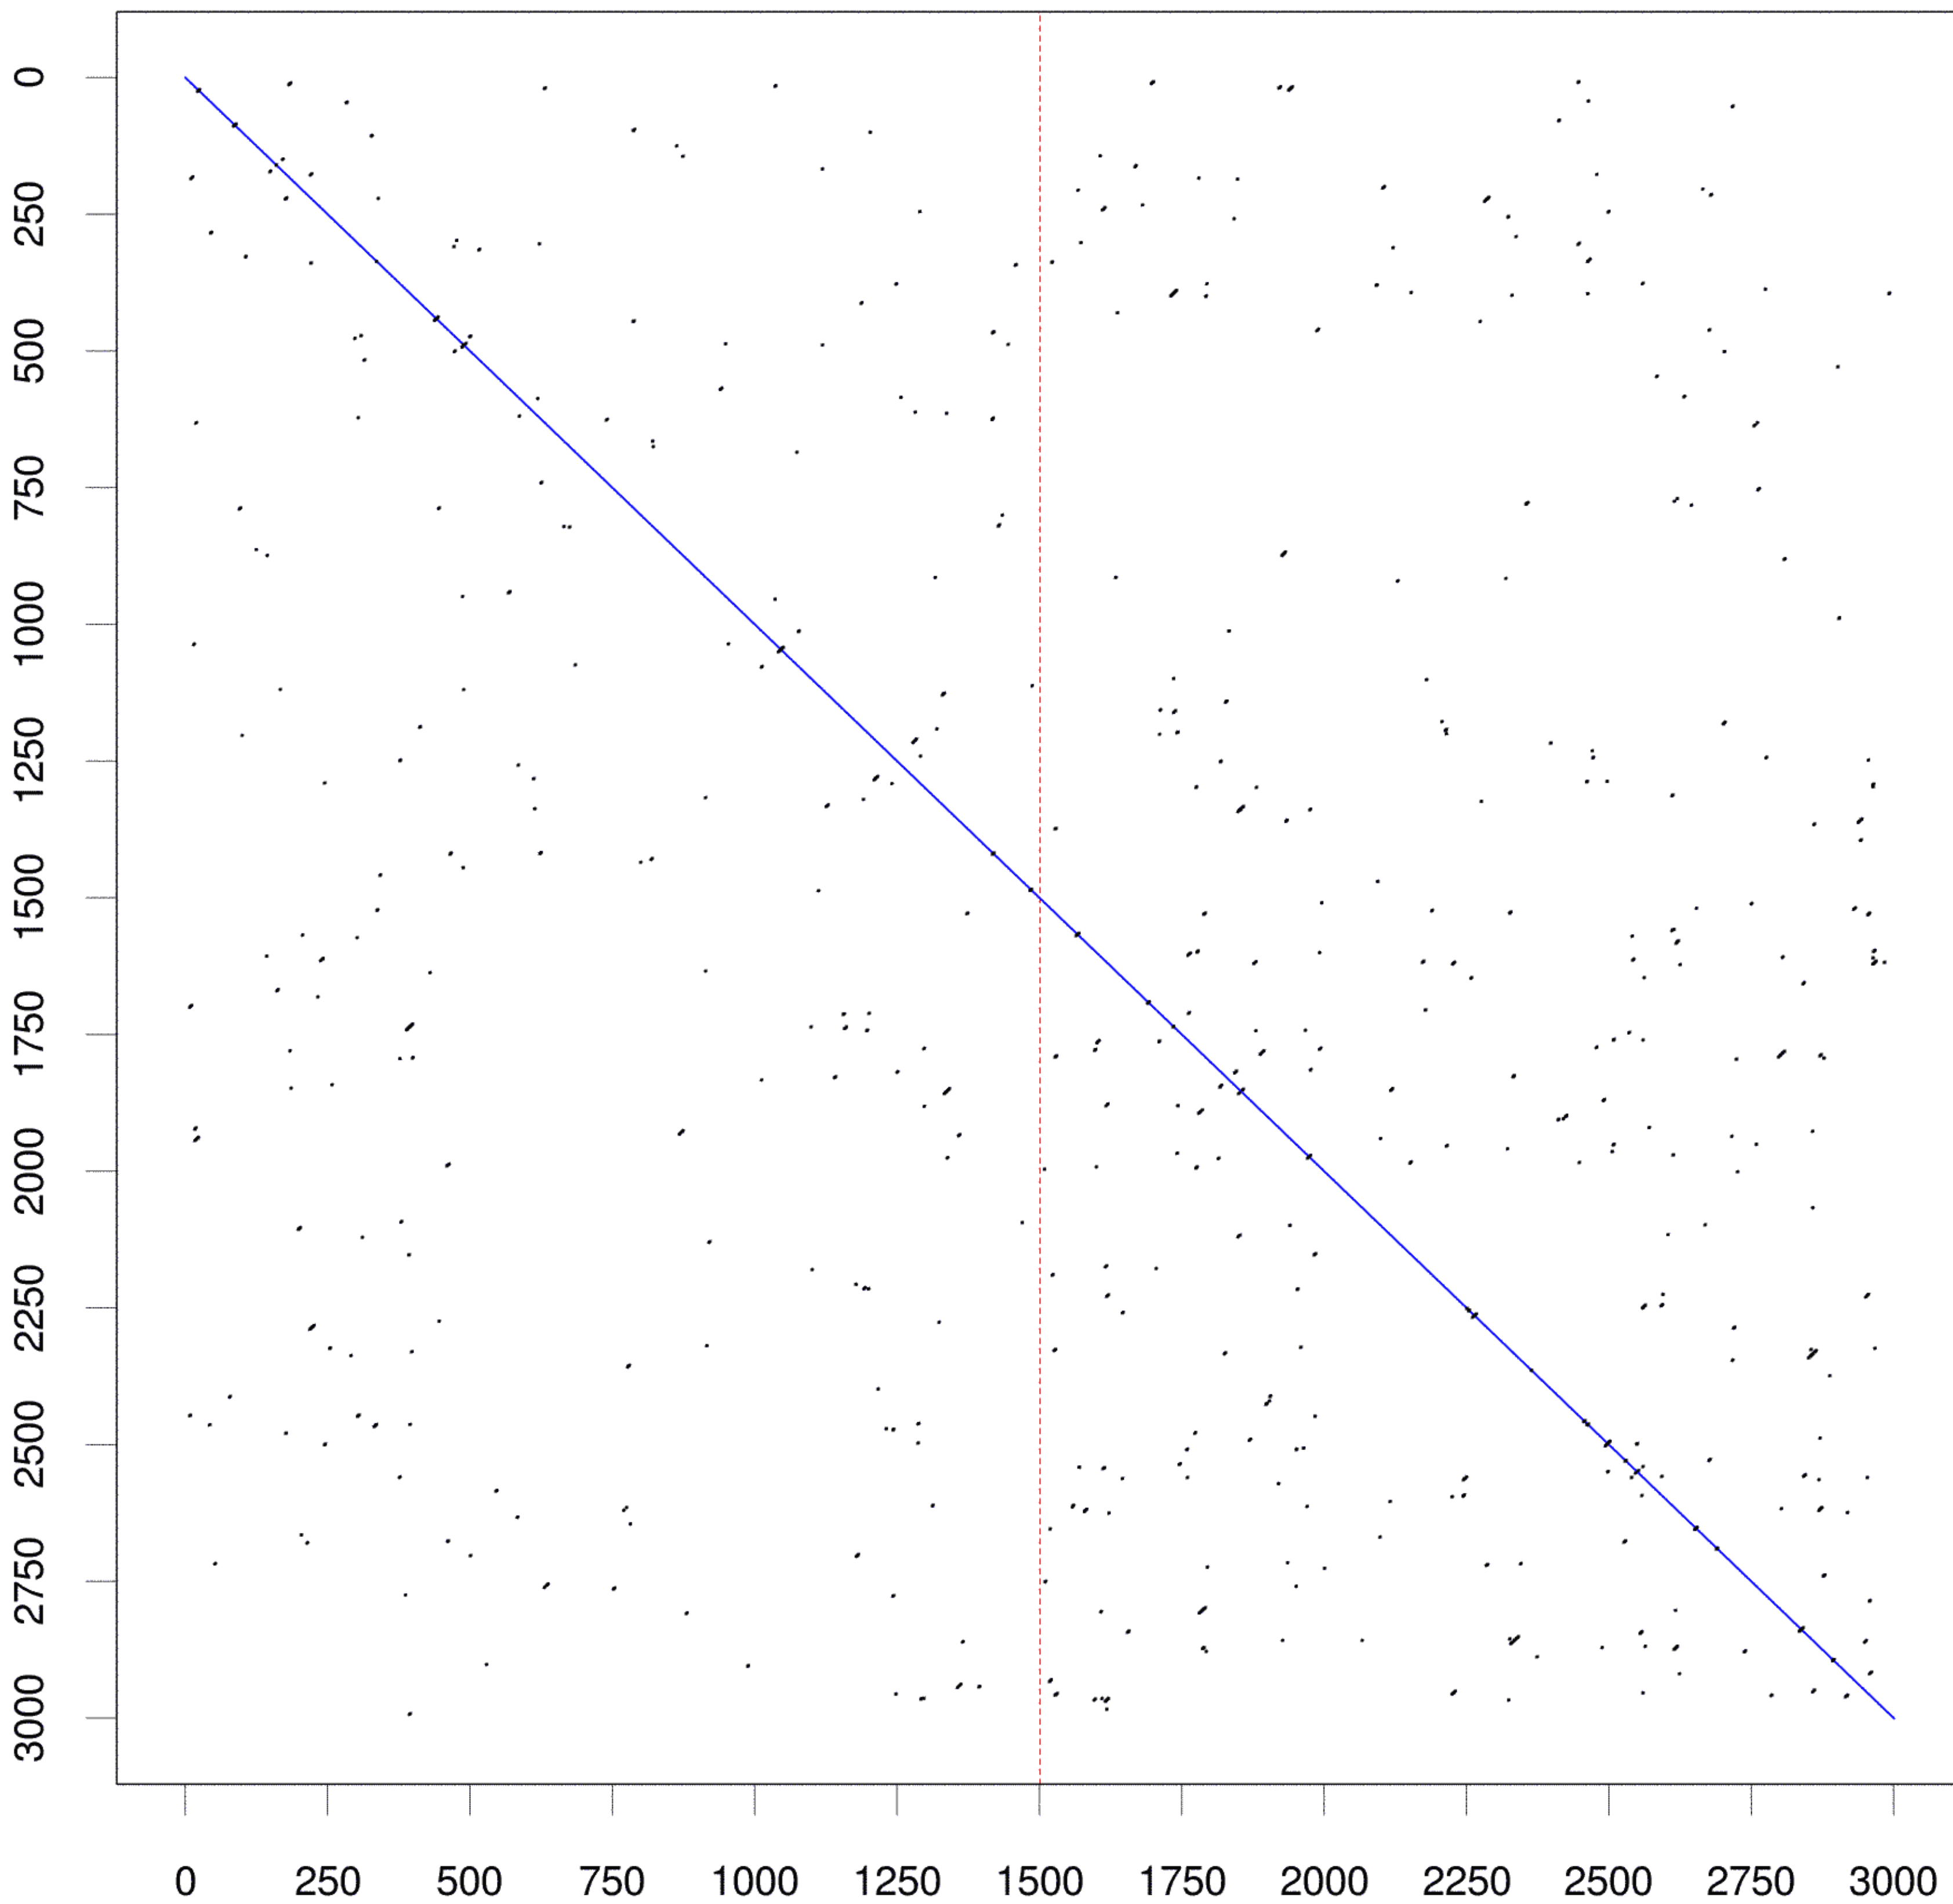

Position on ENSBTAG00000023177

# ENSBTAG00000037452

Position on ENSBTAG00000037452

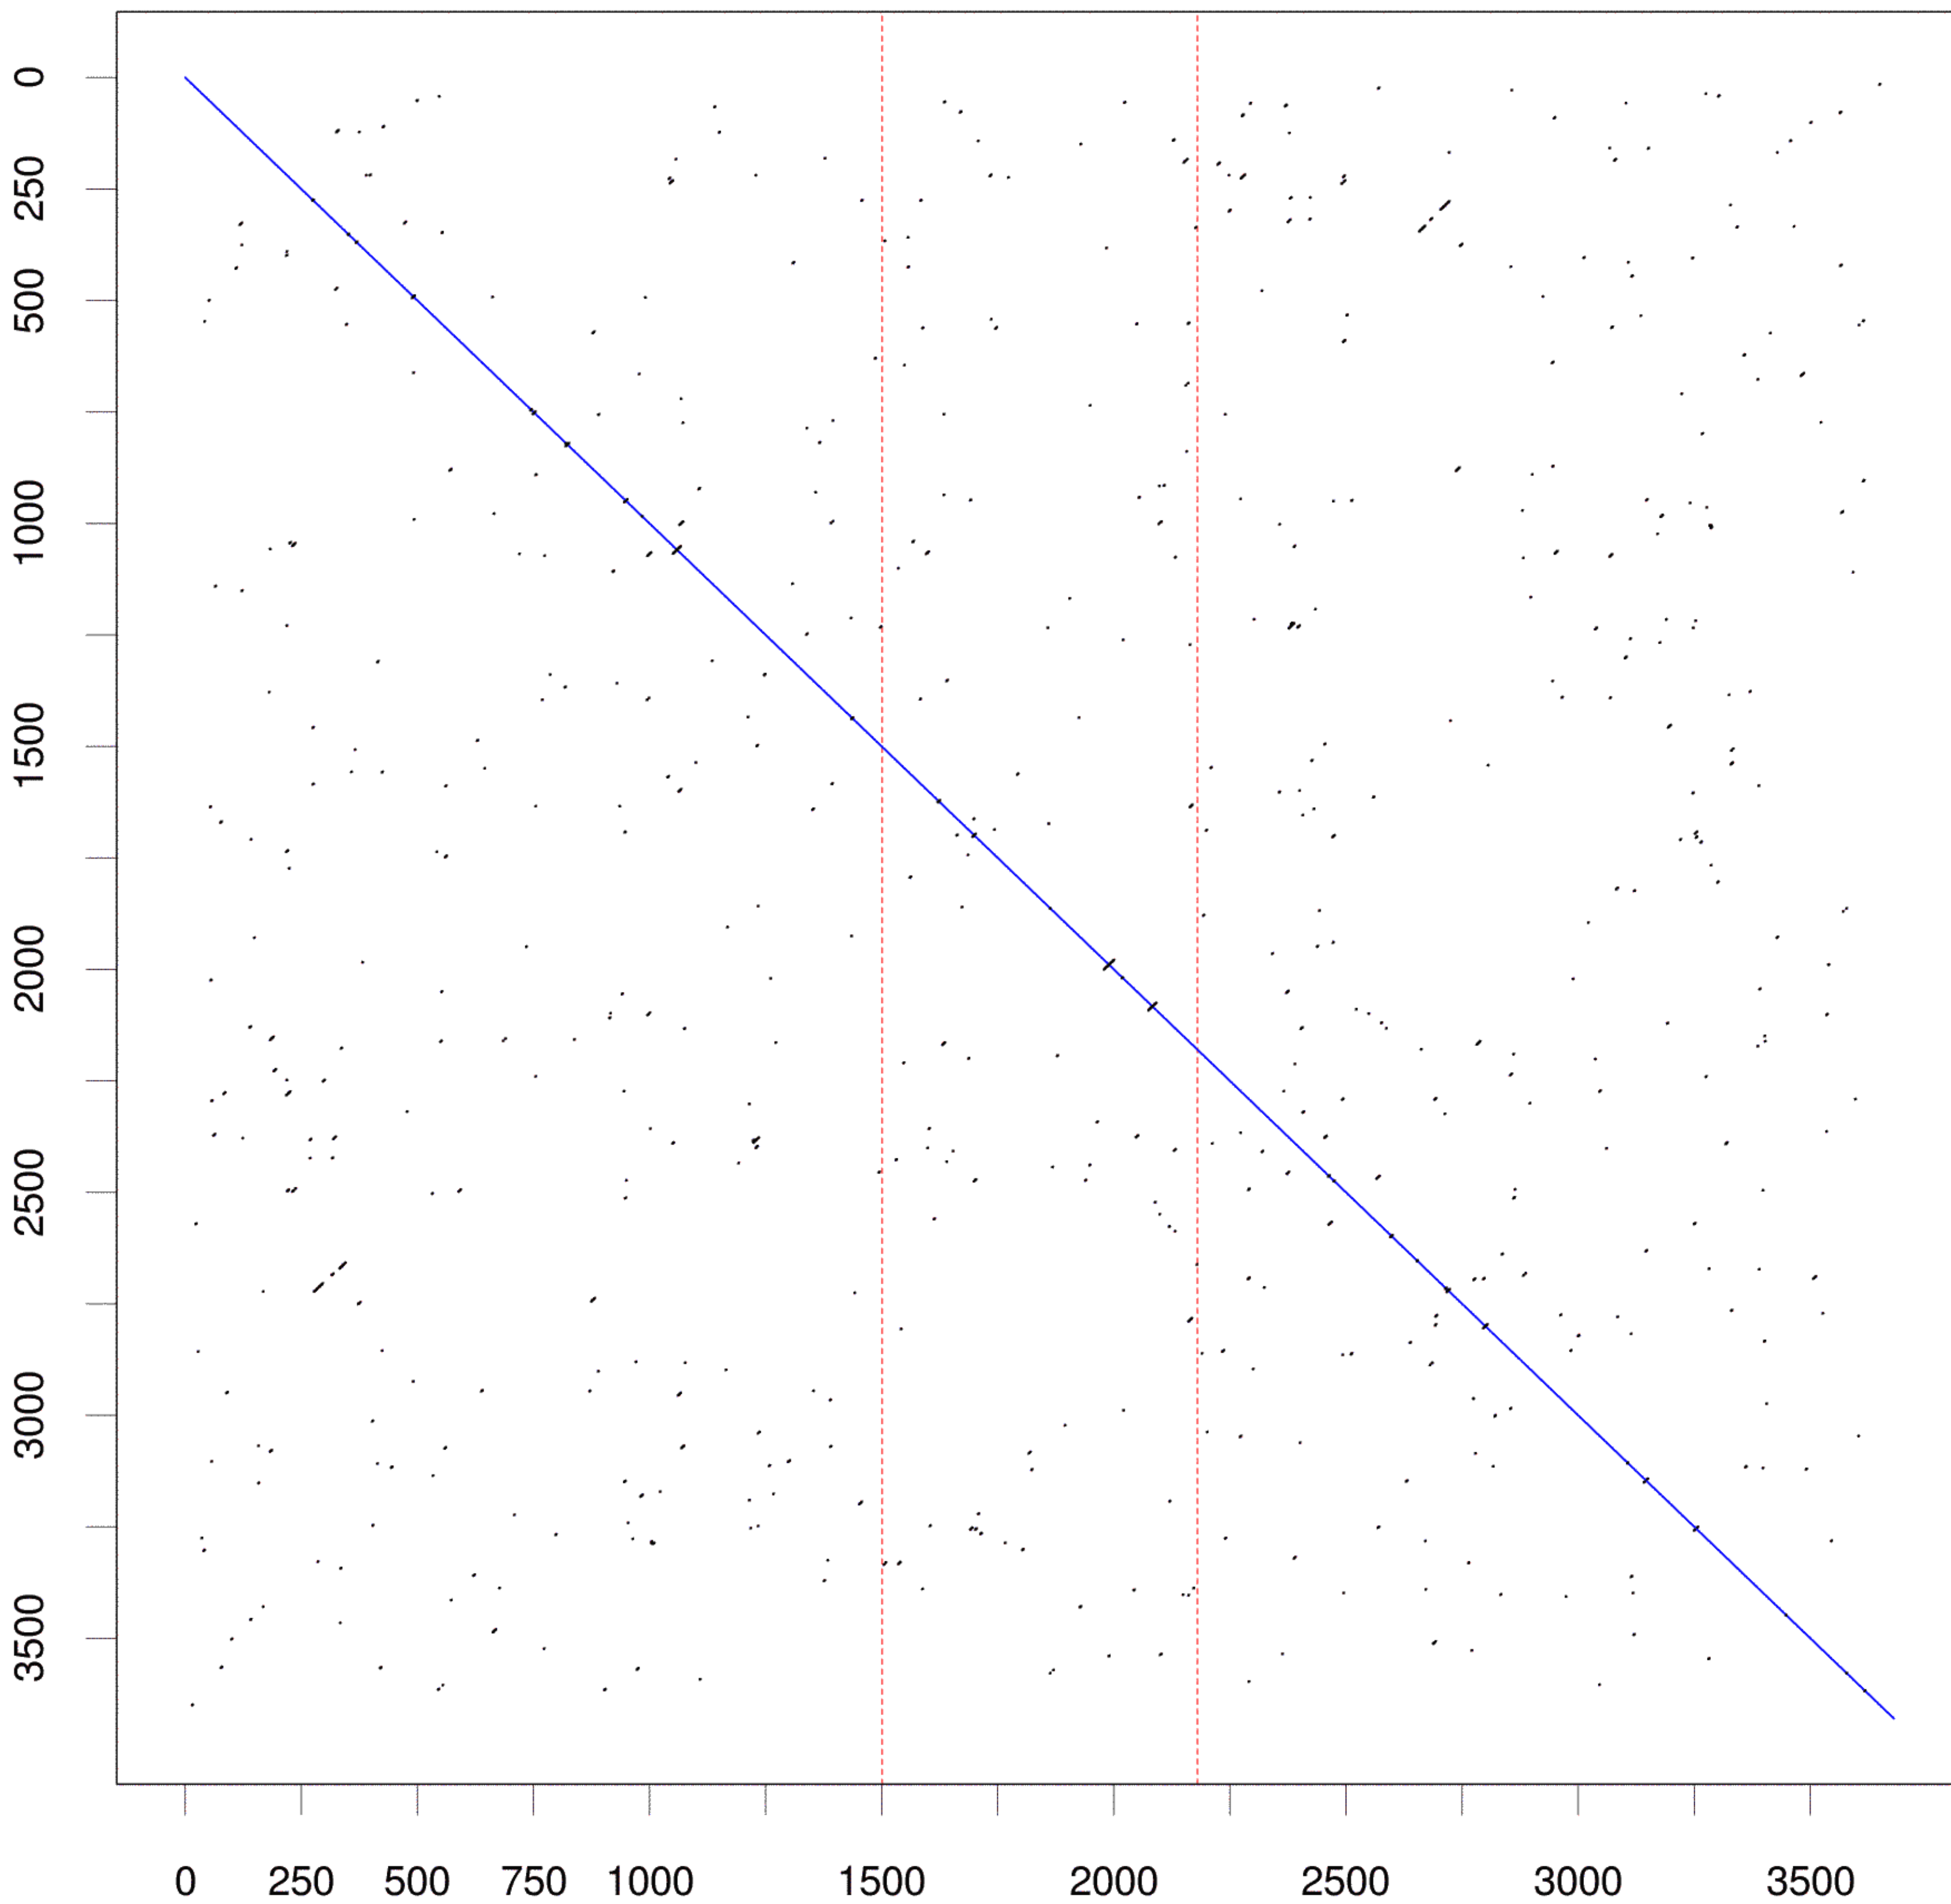

Position on ENSBTAG00000037452

# ENSBTAG00000037799

Position on ENSBTAG00000037799

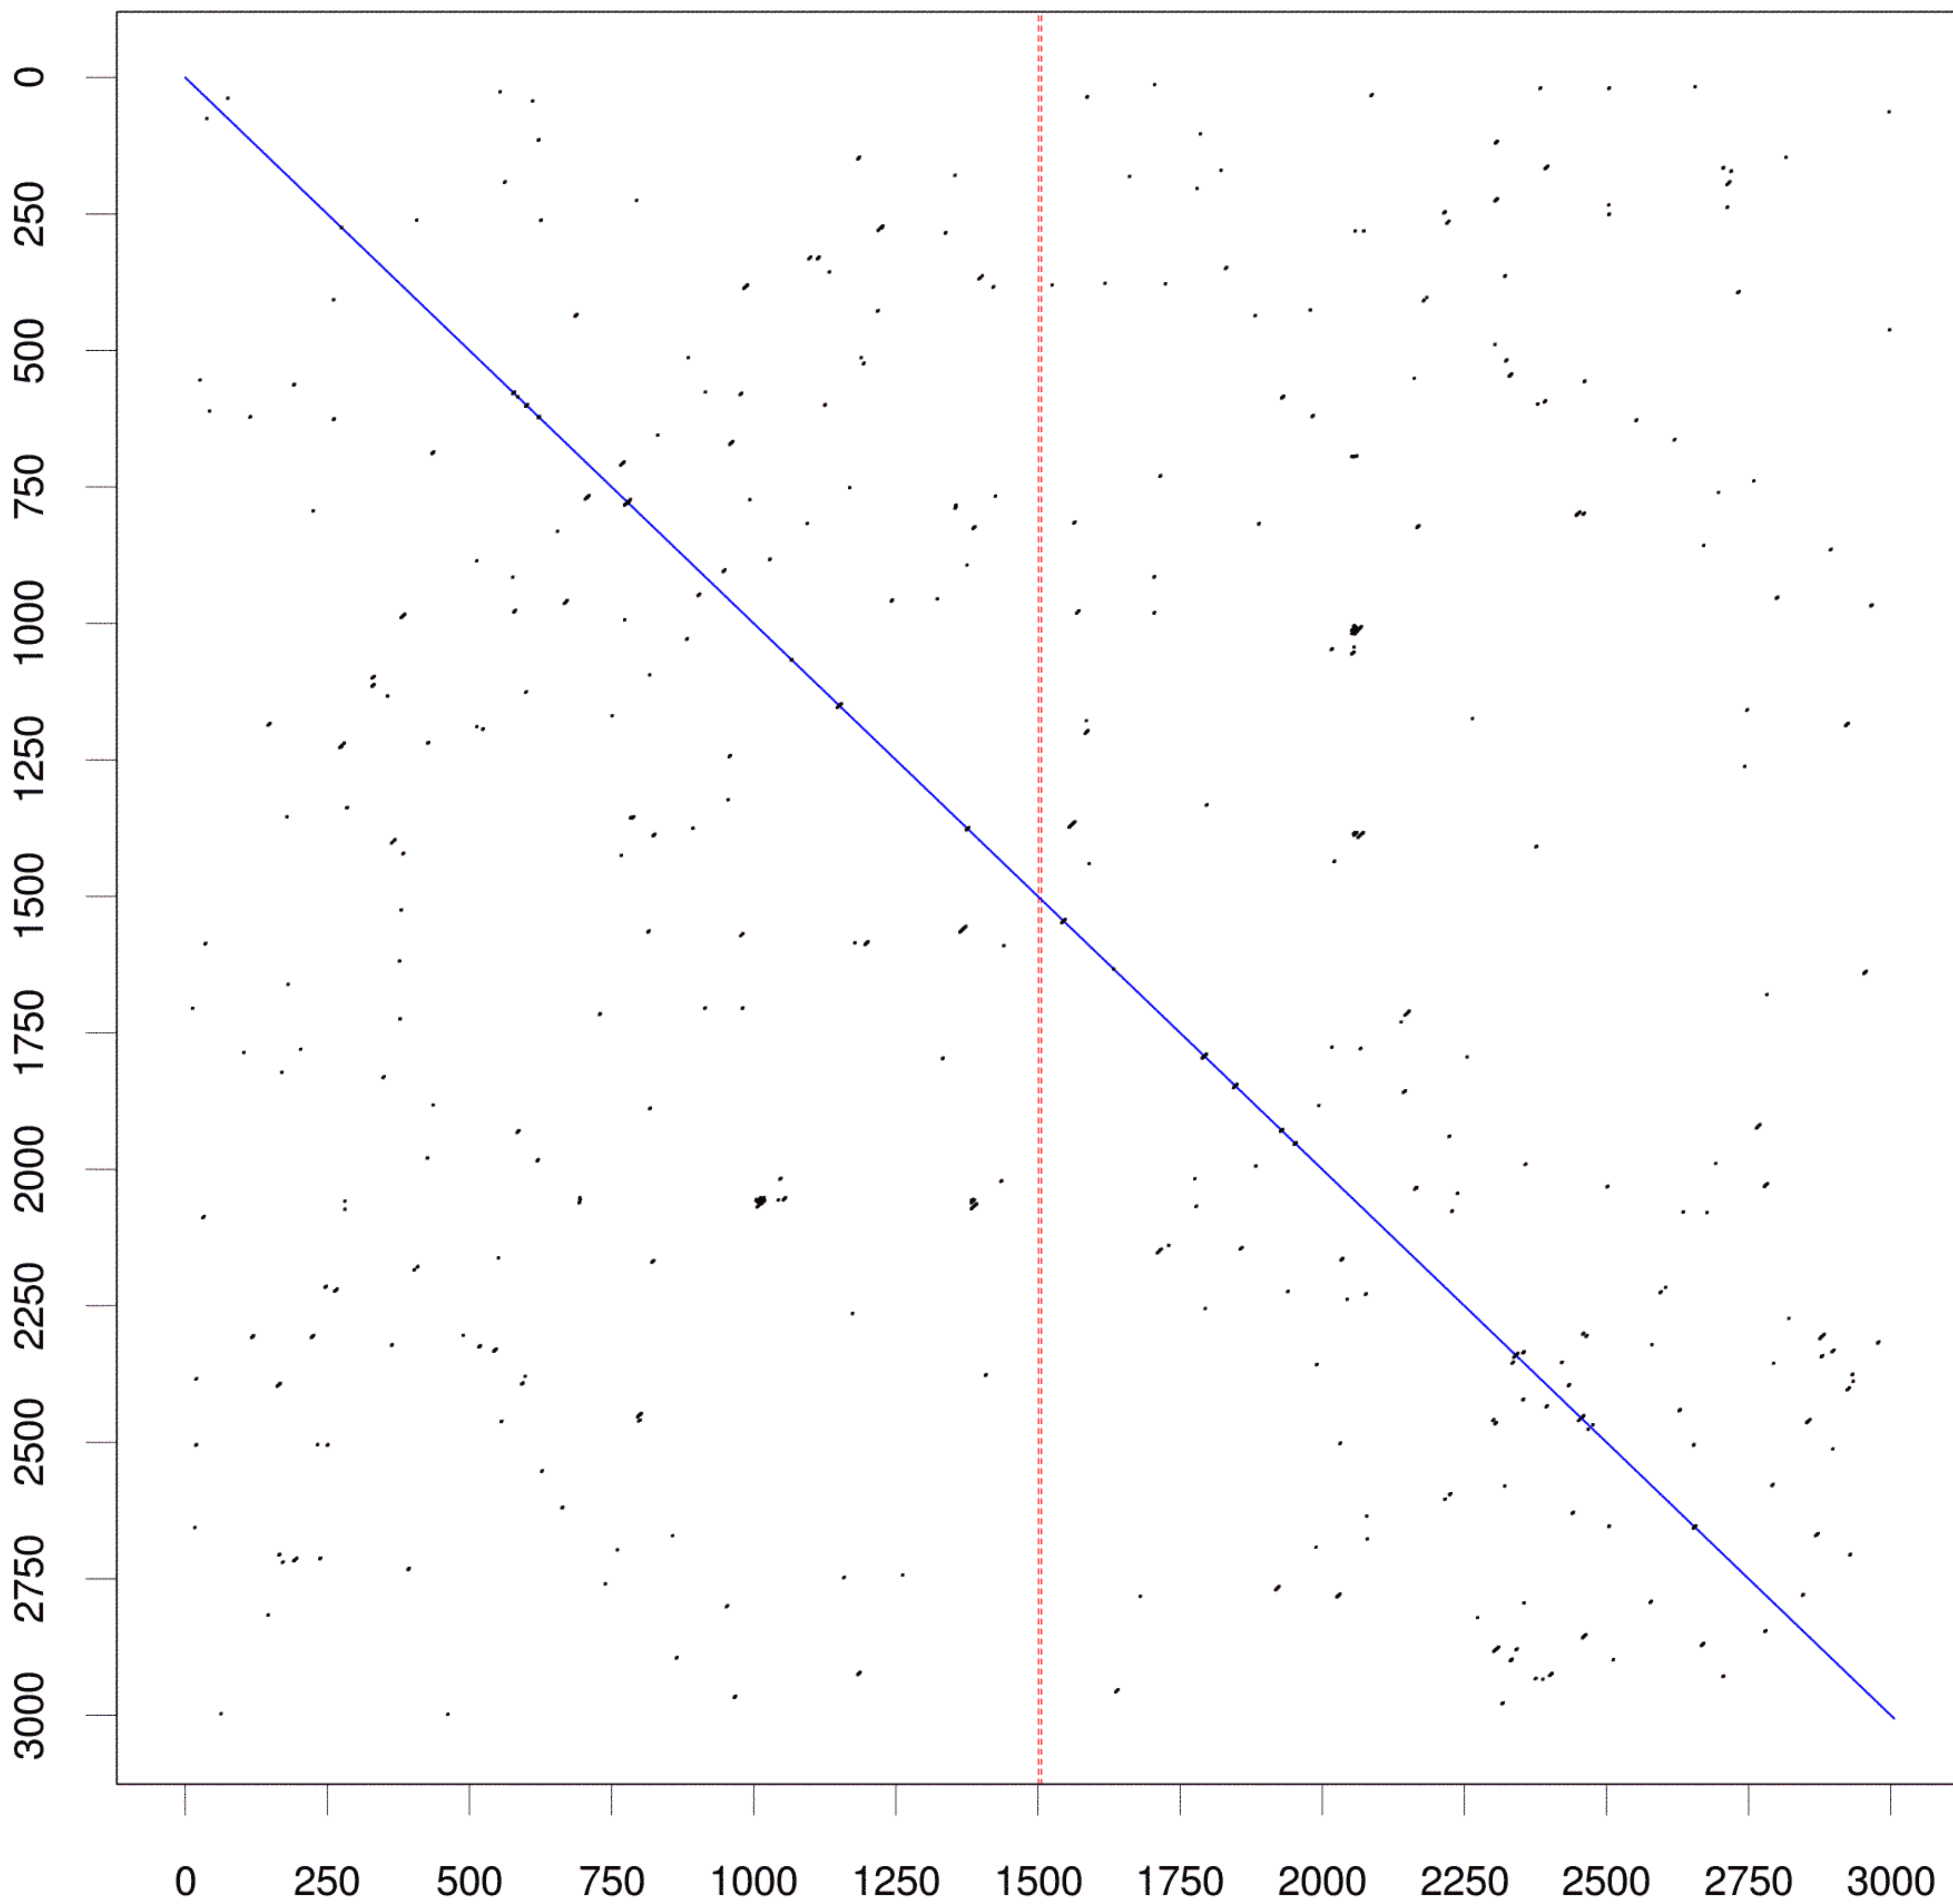

Position on ENSBTAG00000037799

# ENSBTAG00000040392

Position on ENSBTAG00000040392

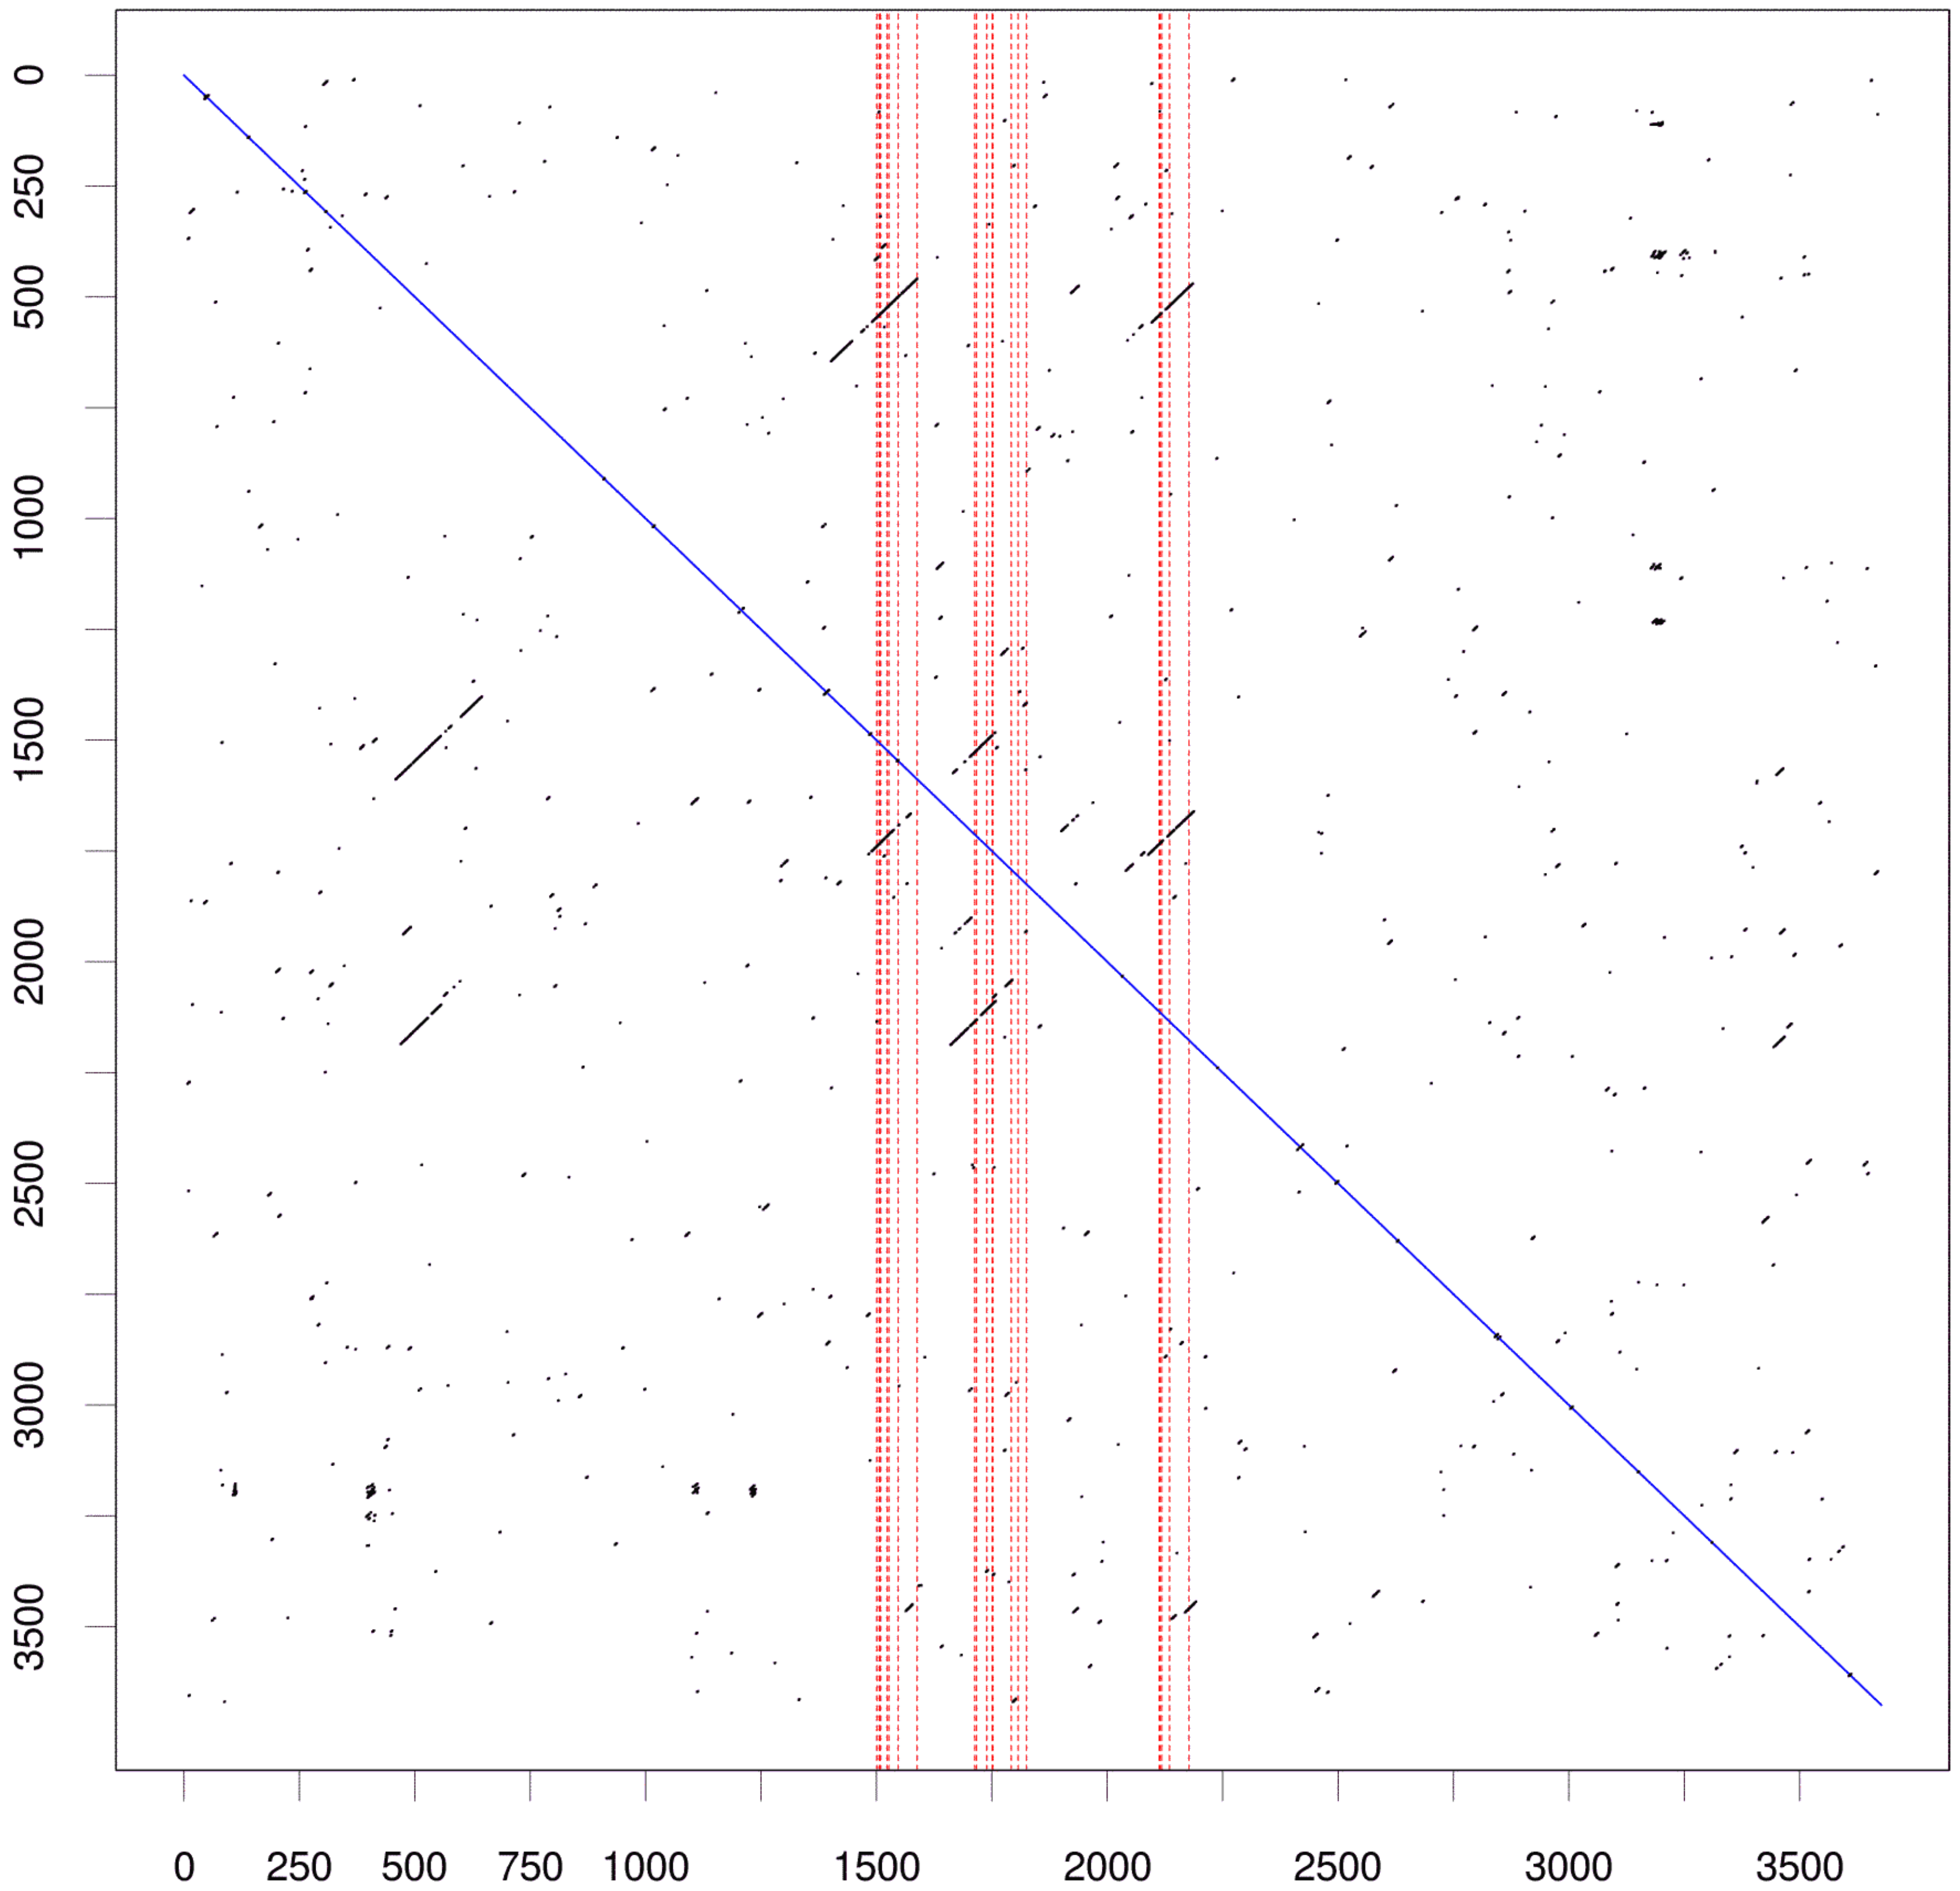

# ENSBTAG00000046117

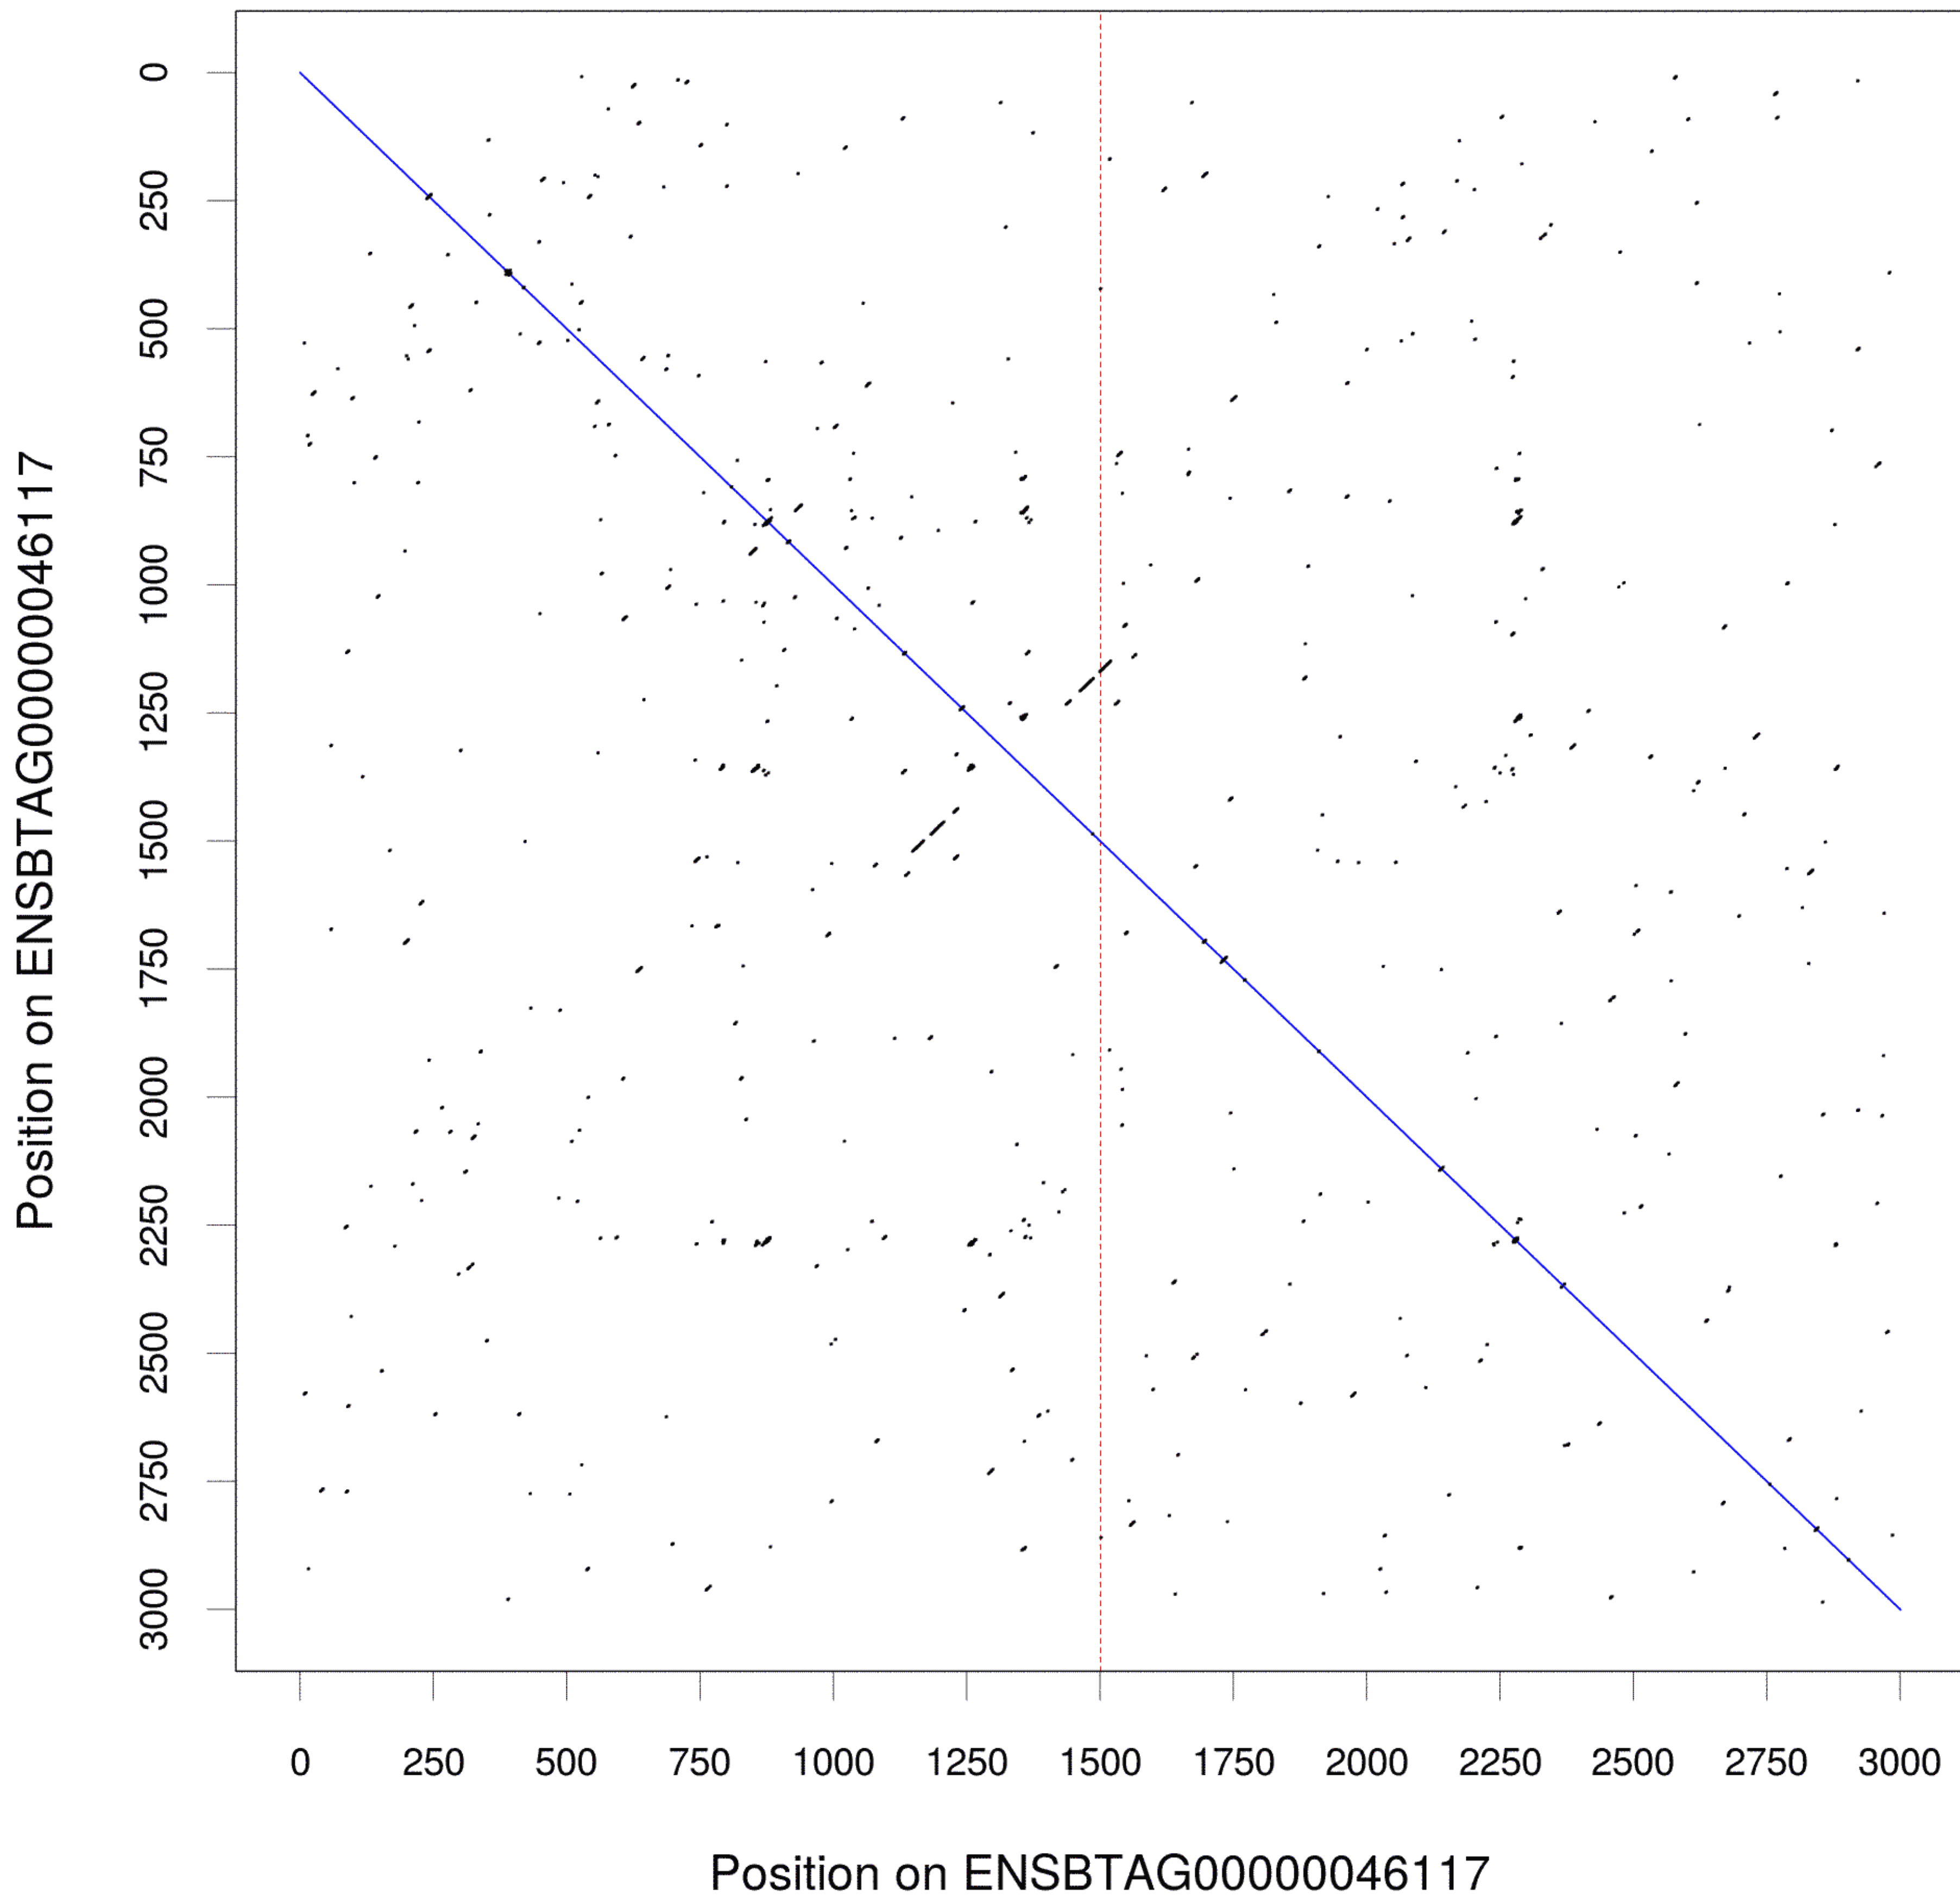

# ENSBTAG00000046547

Position on ENSBTAG00000046547

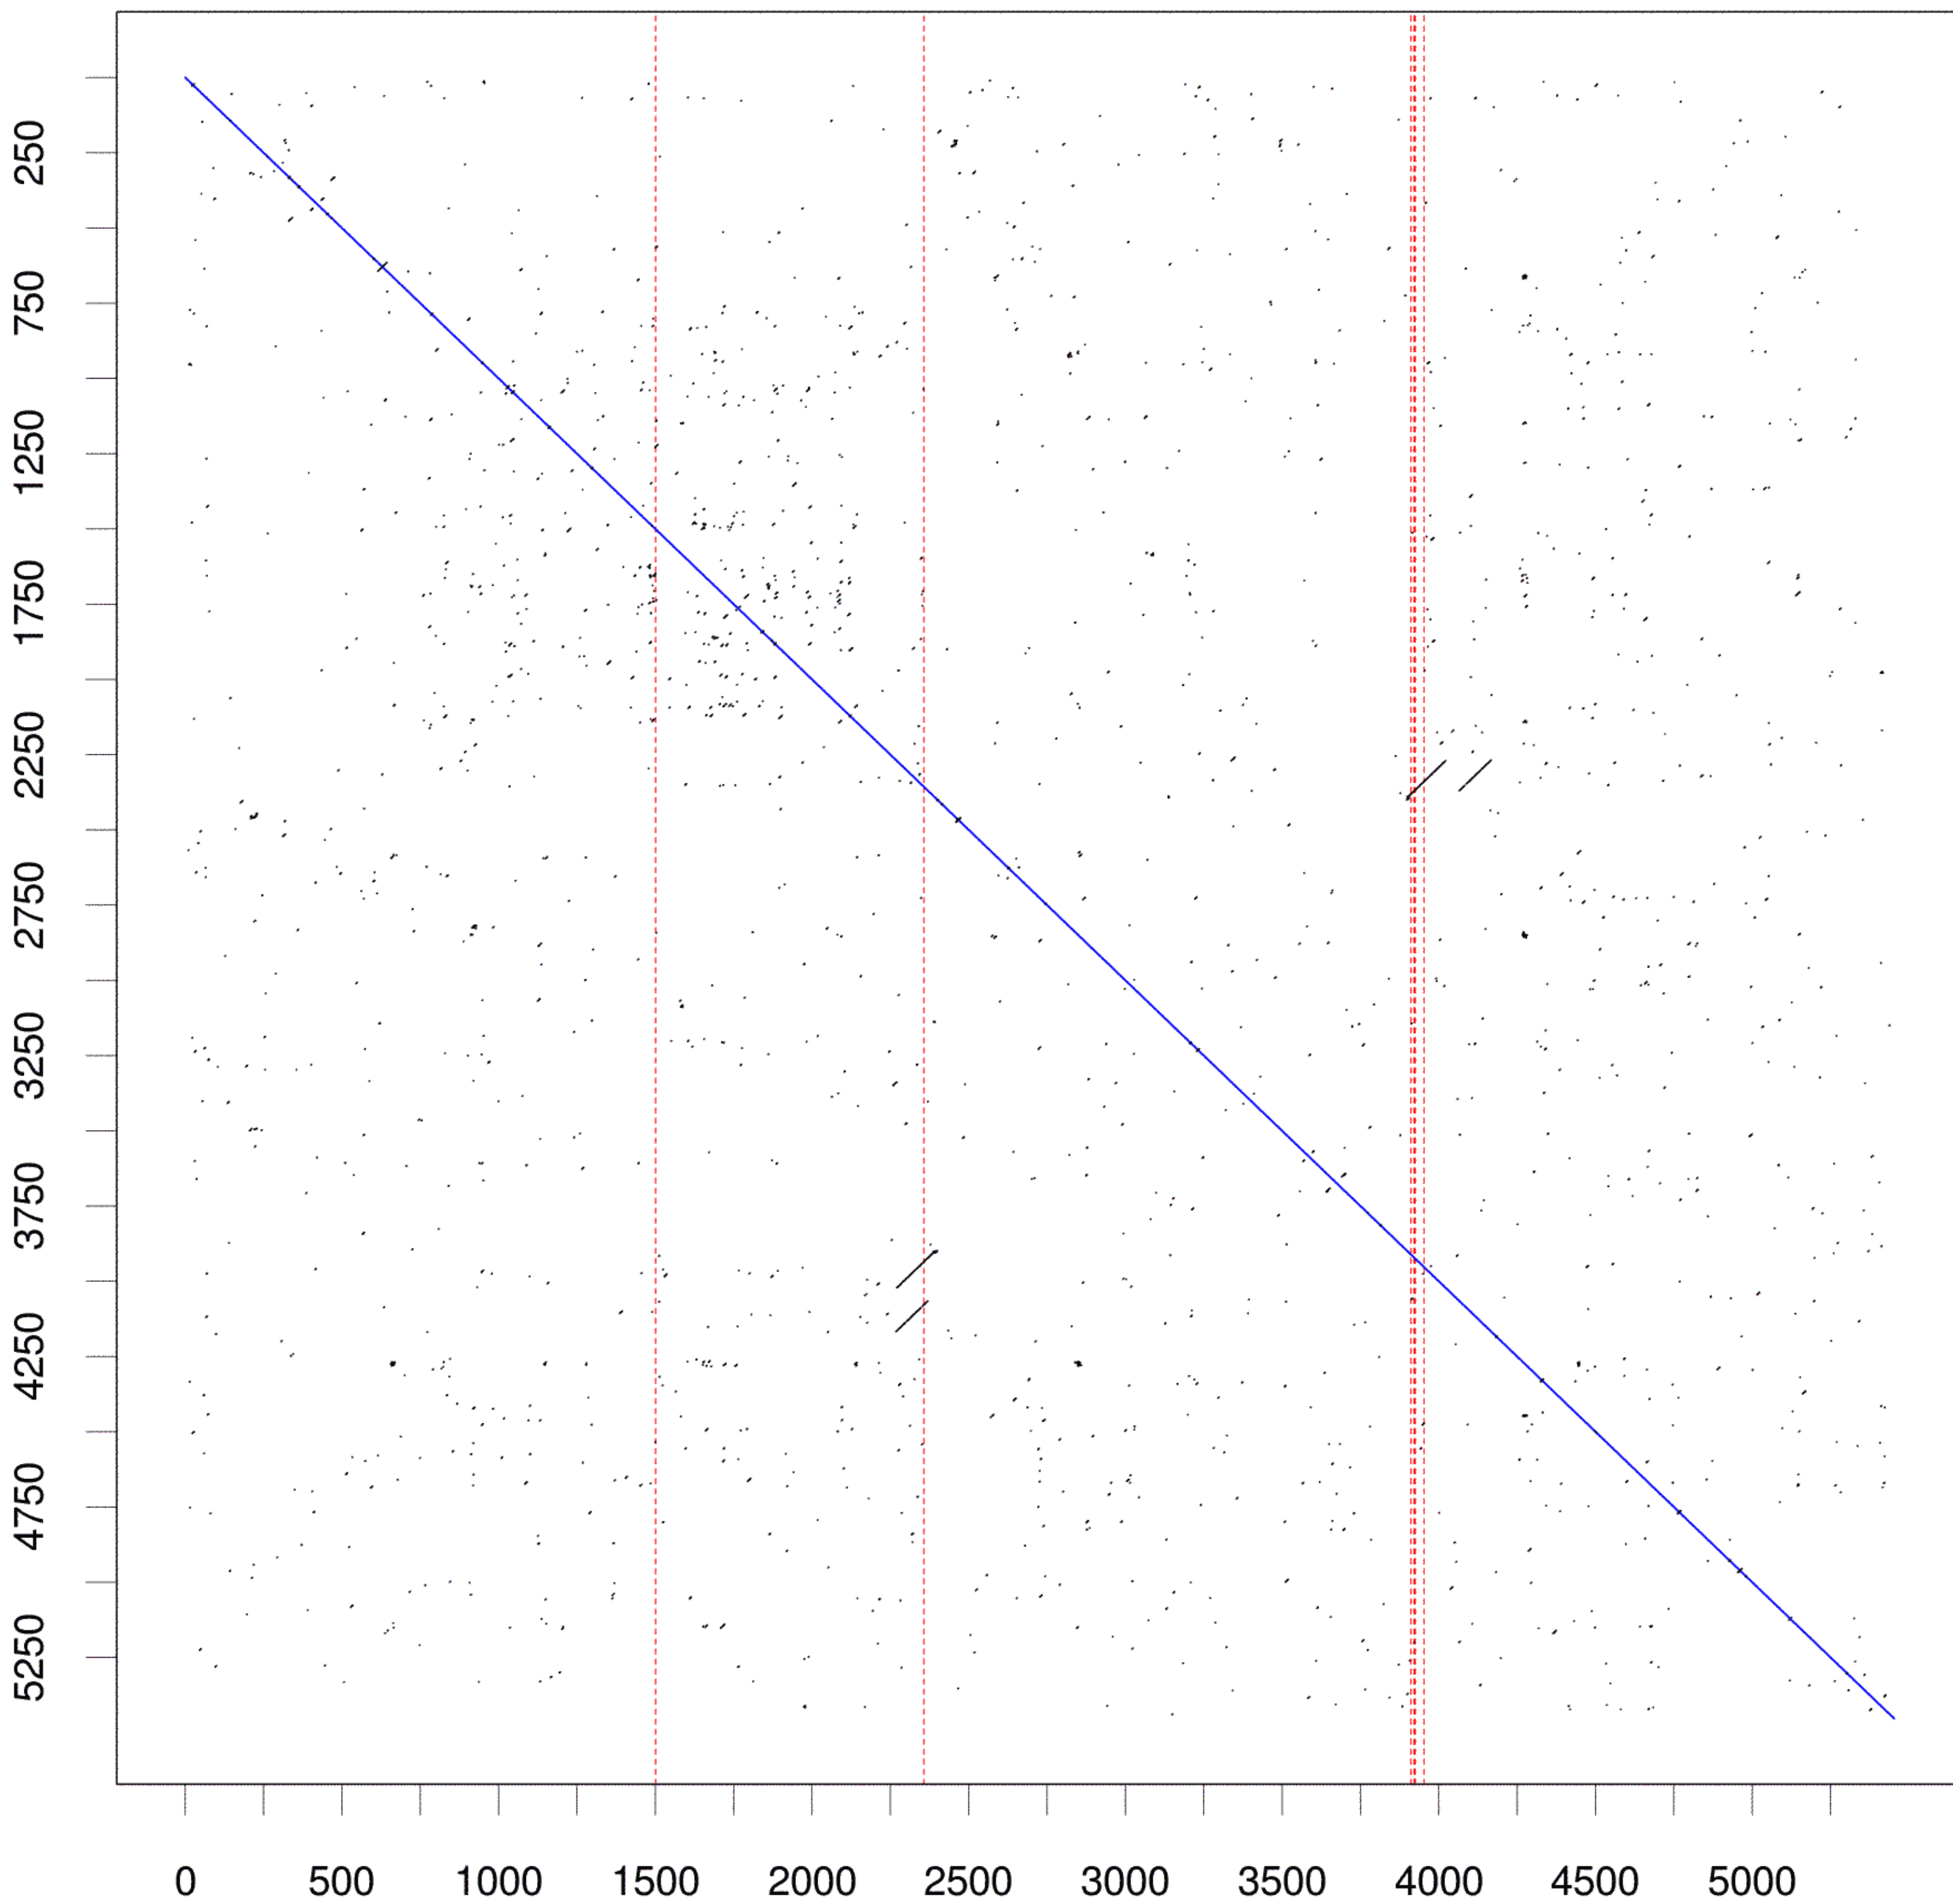

Position on ENSBTAG00000046547



# ERMARD

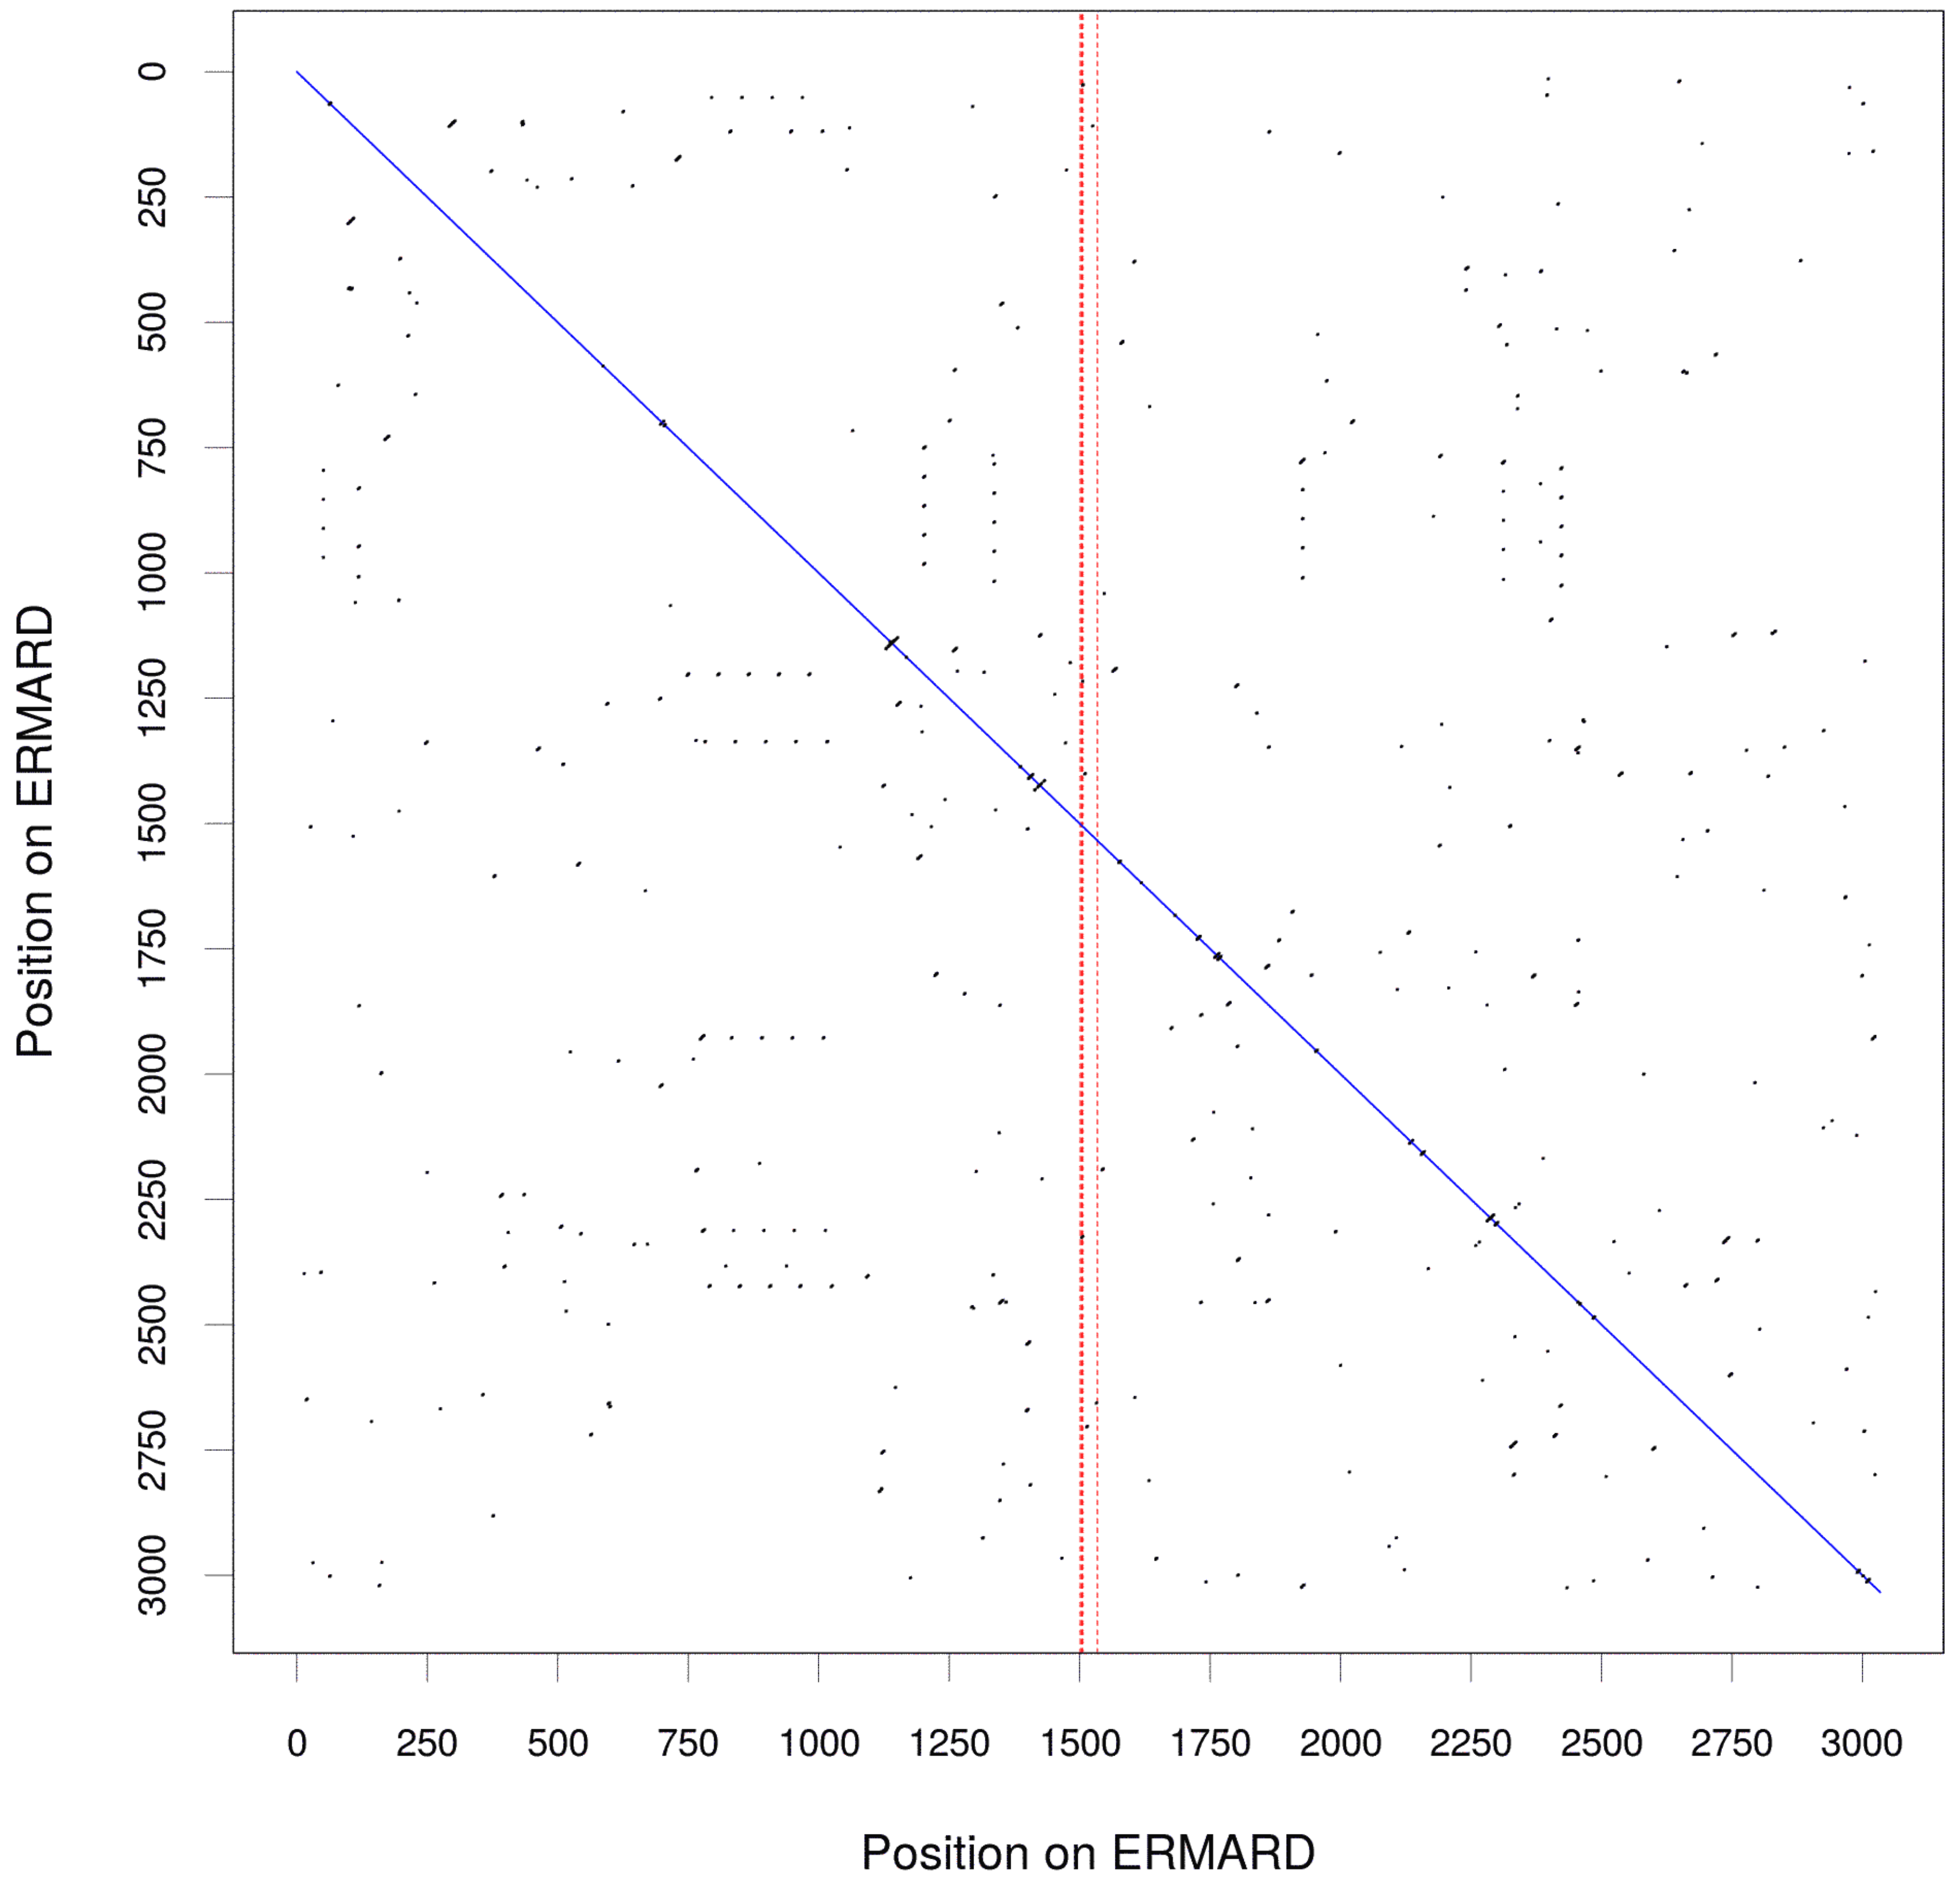

# EXOSC1

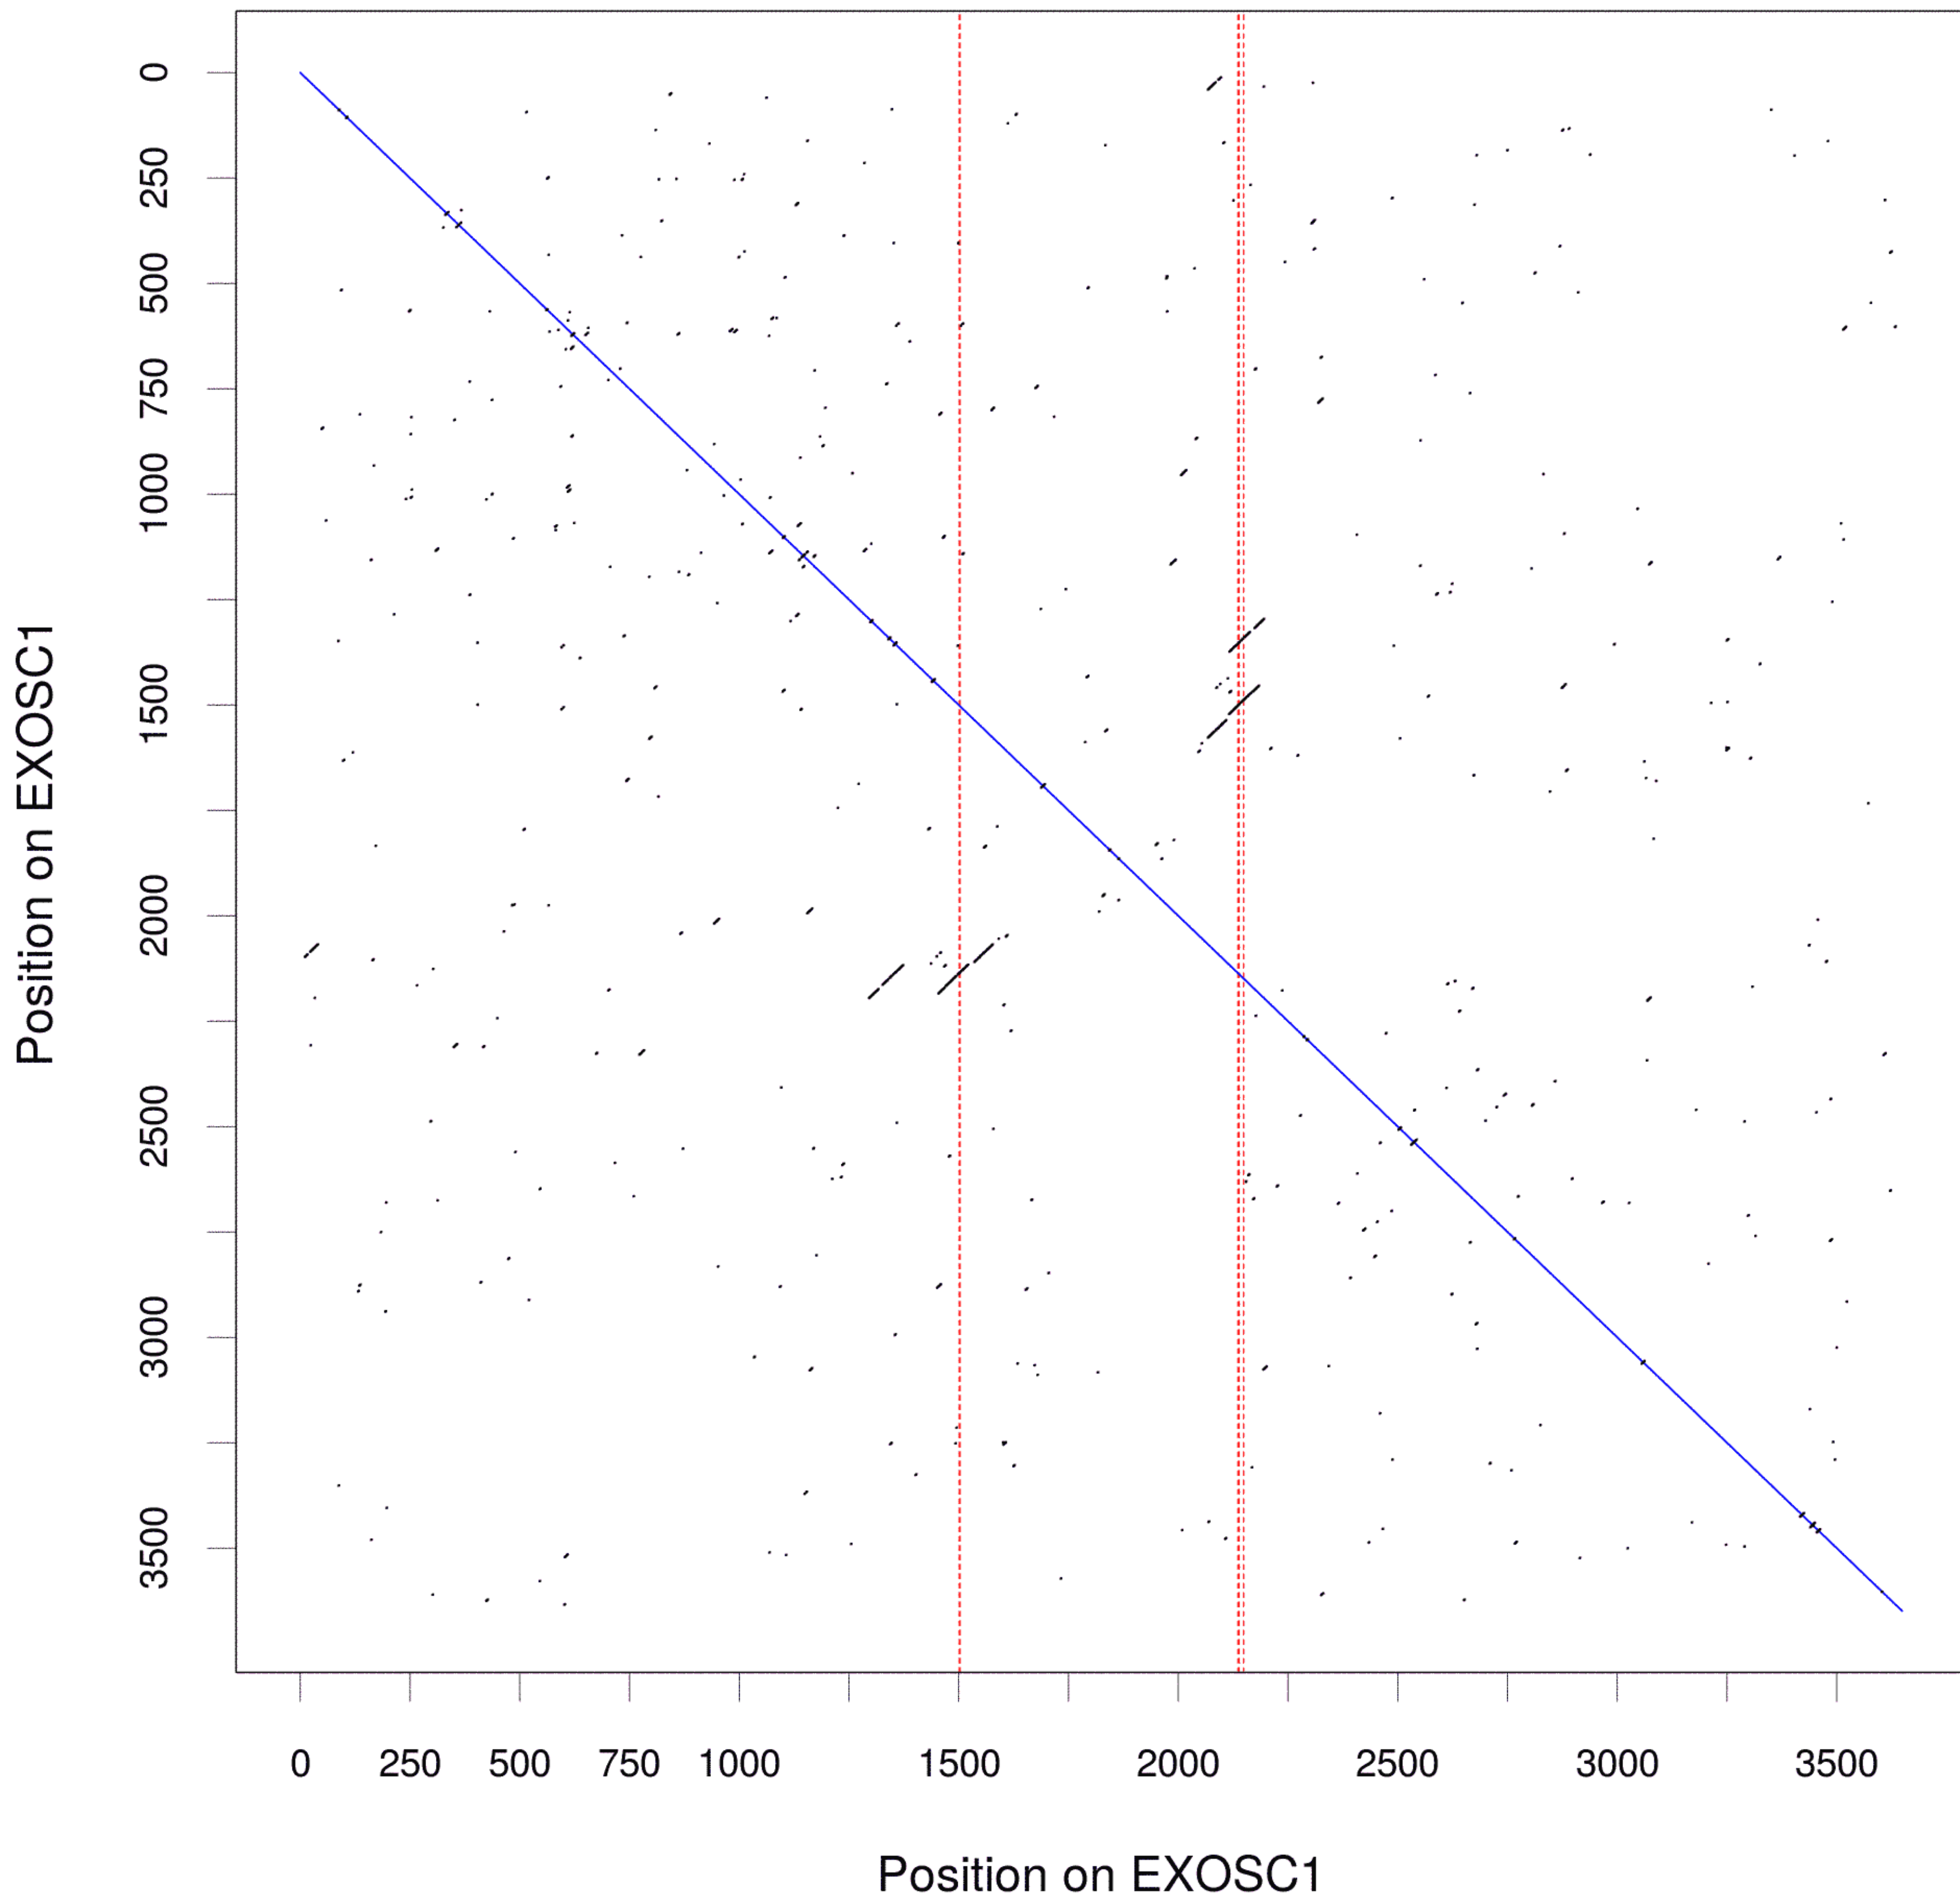

# EXOSC7

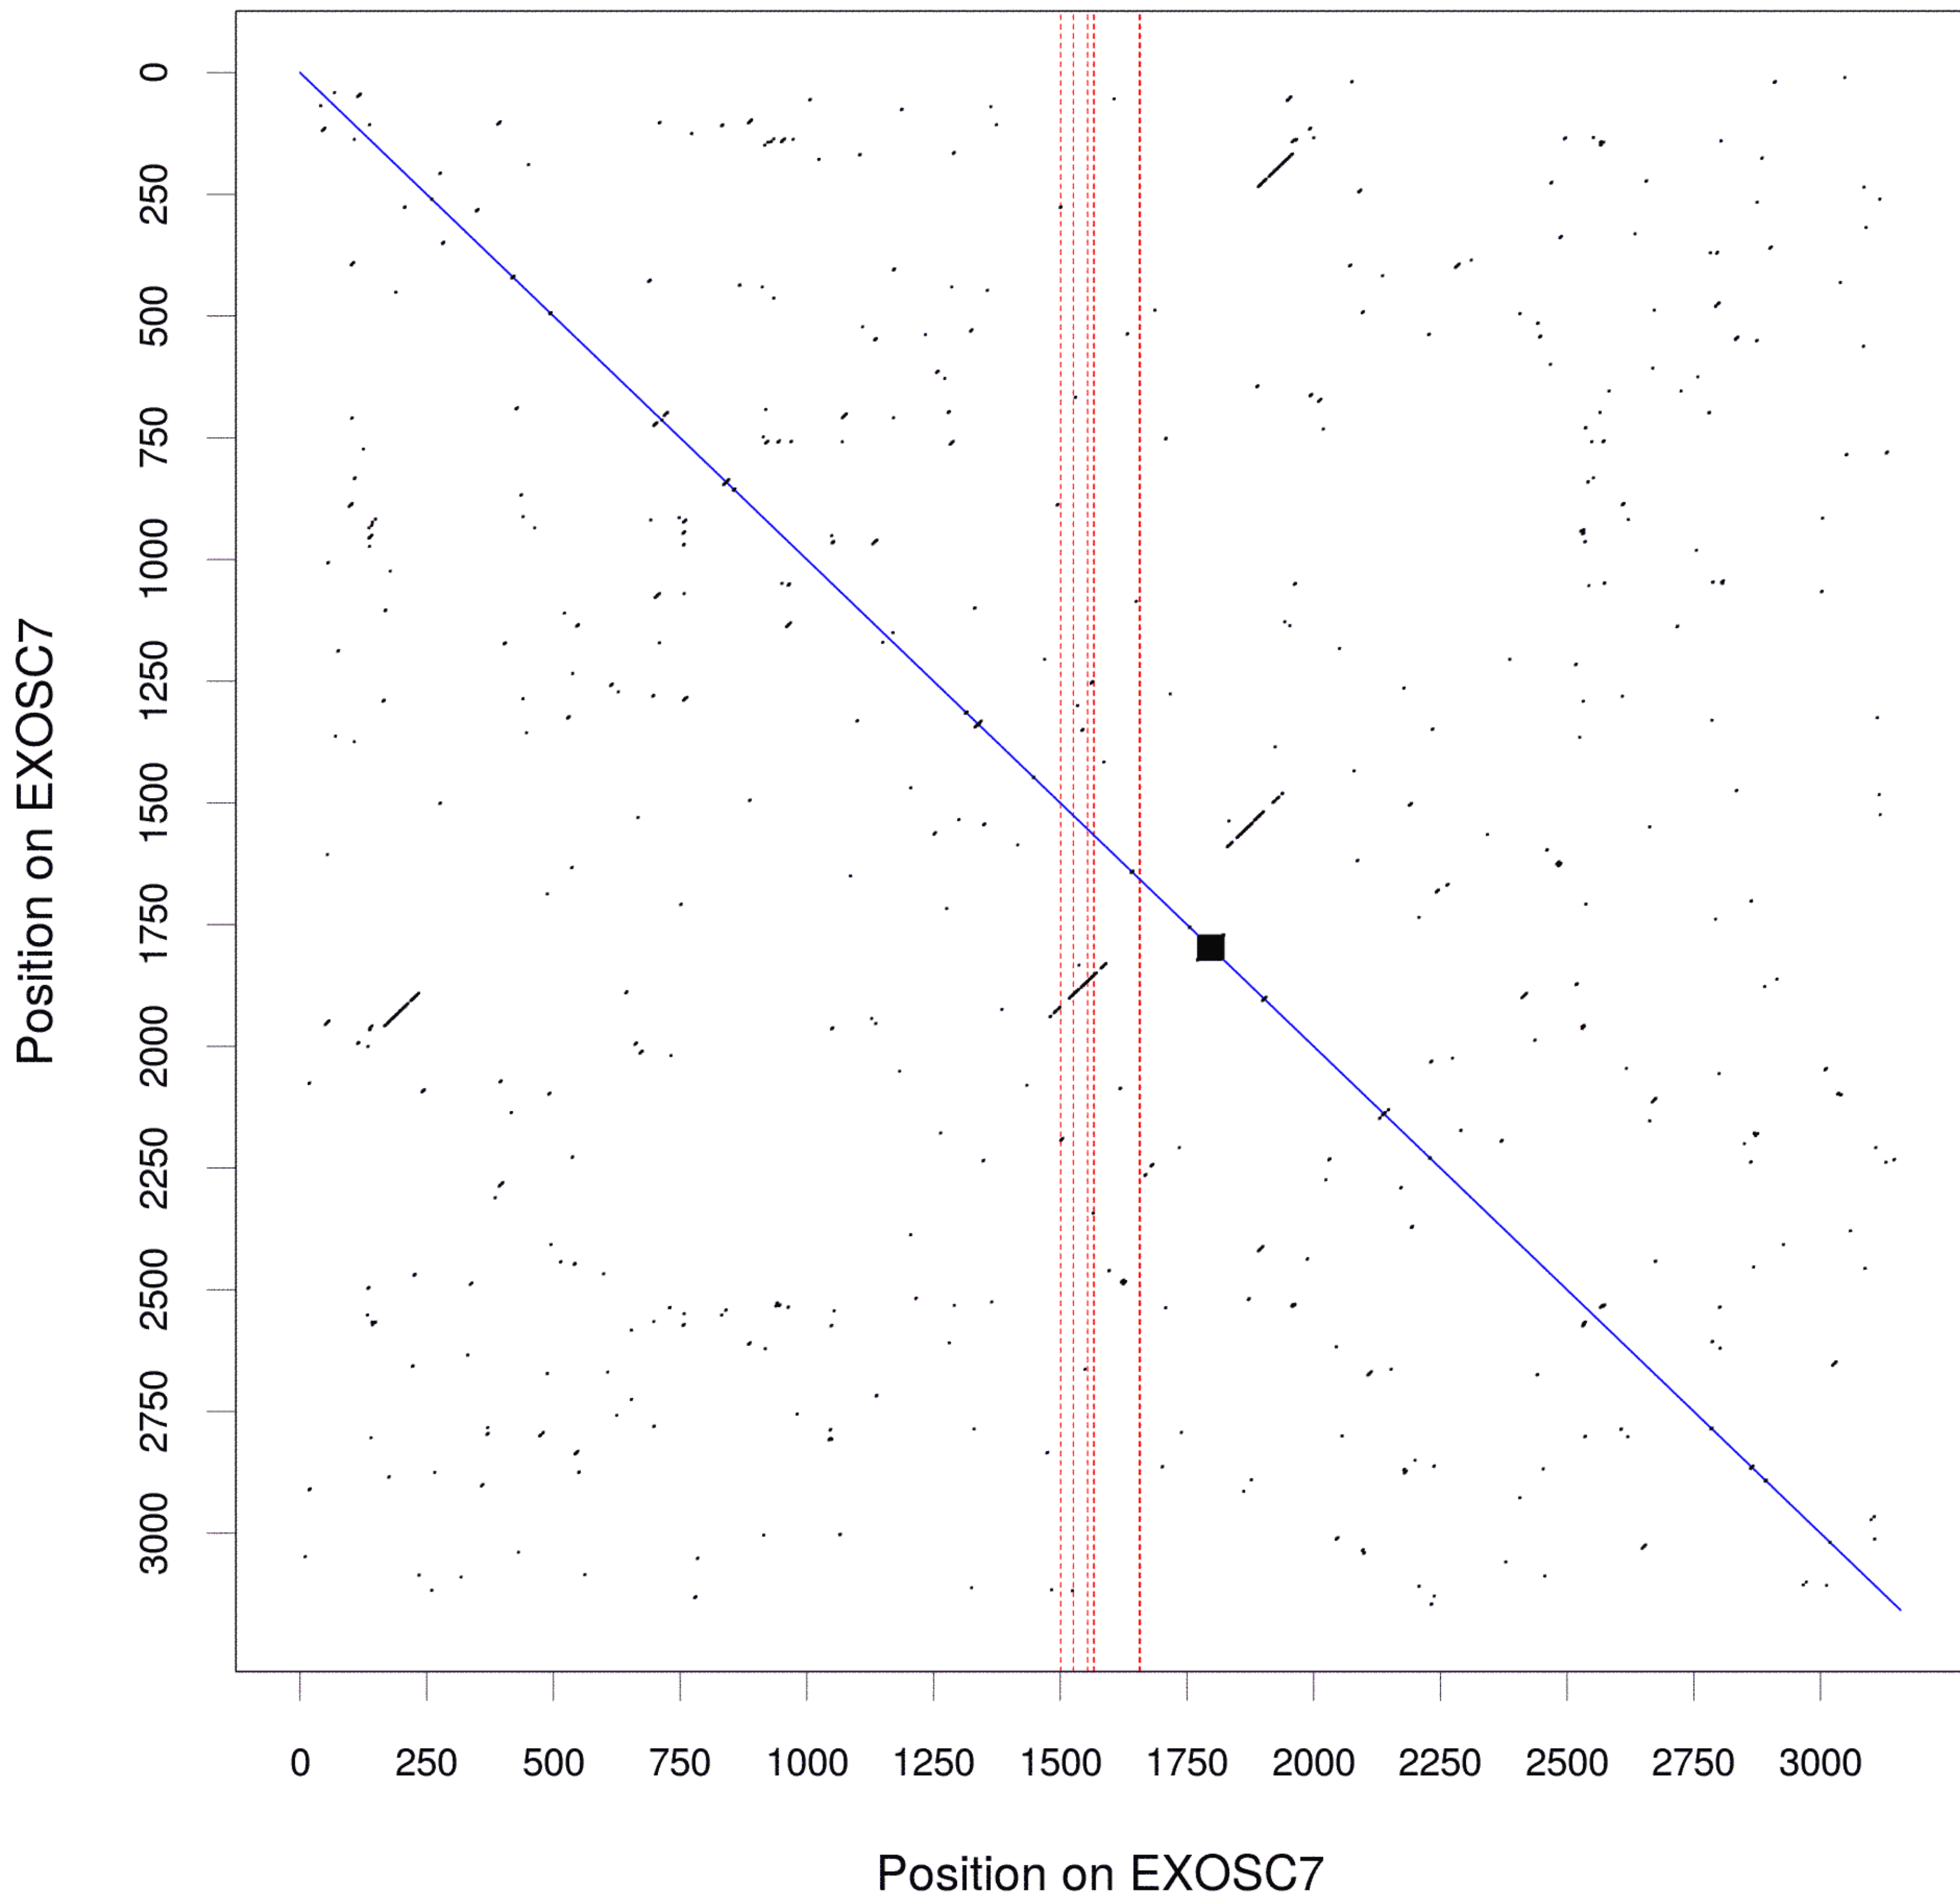

# EXOSC9

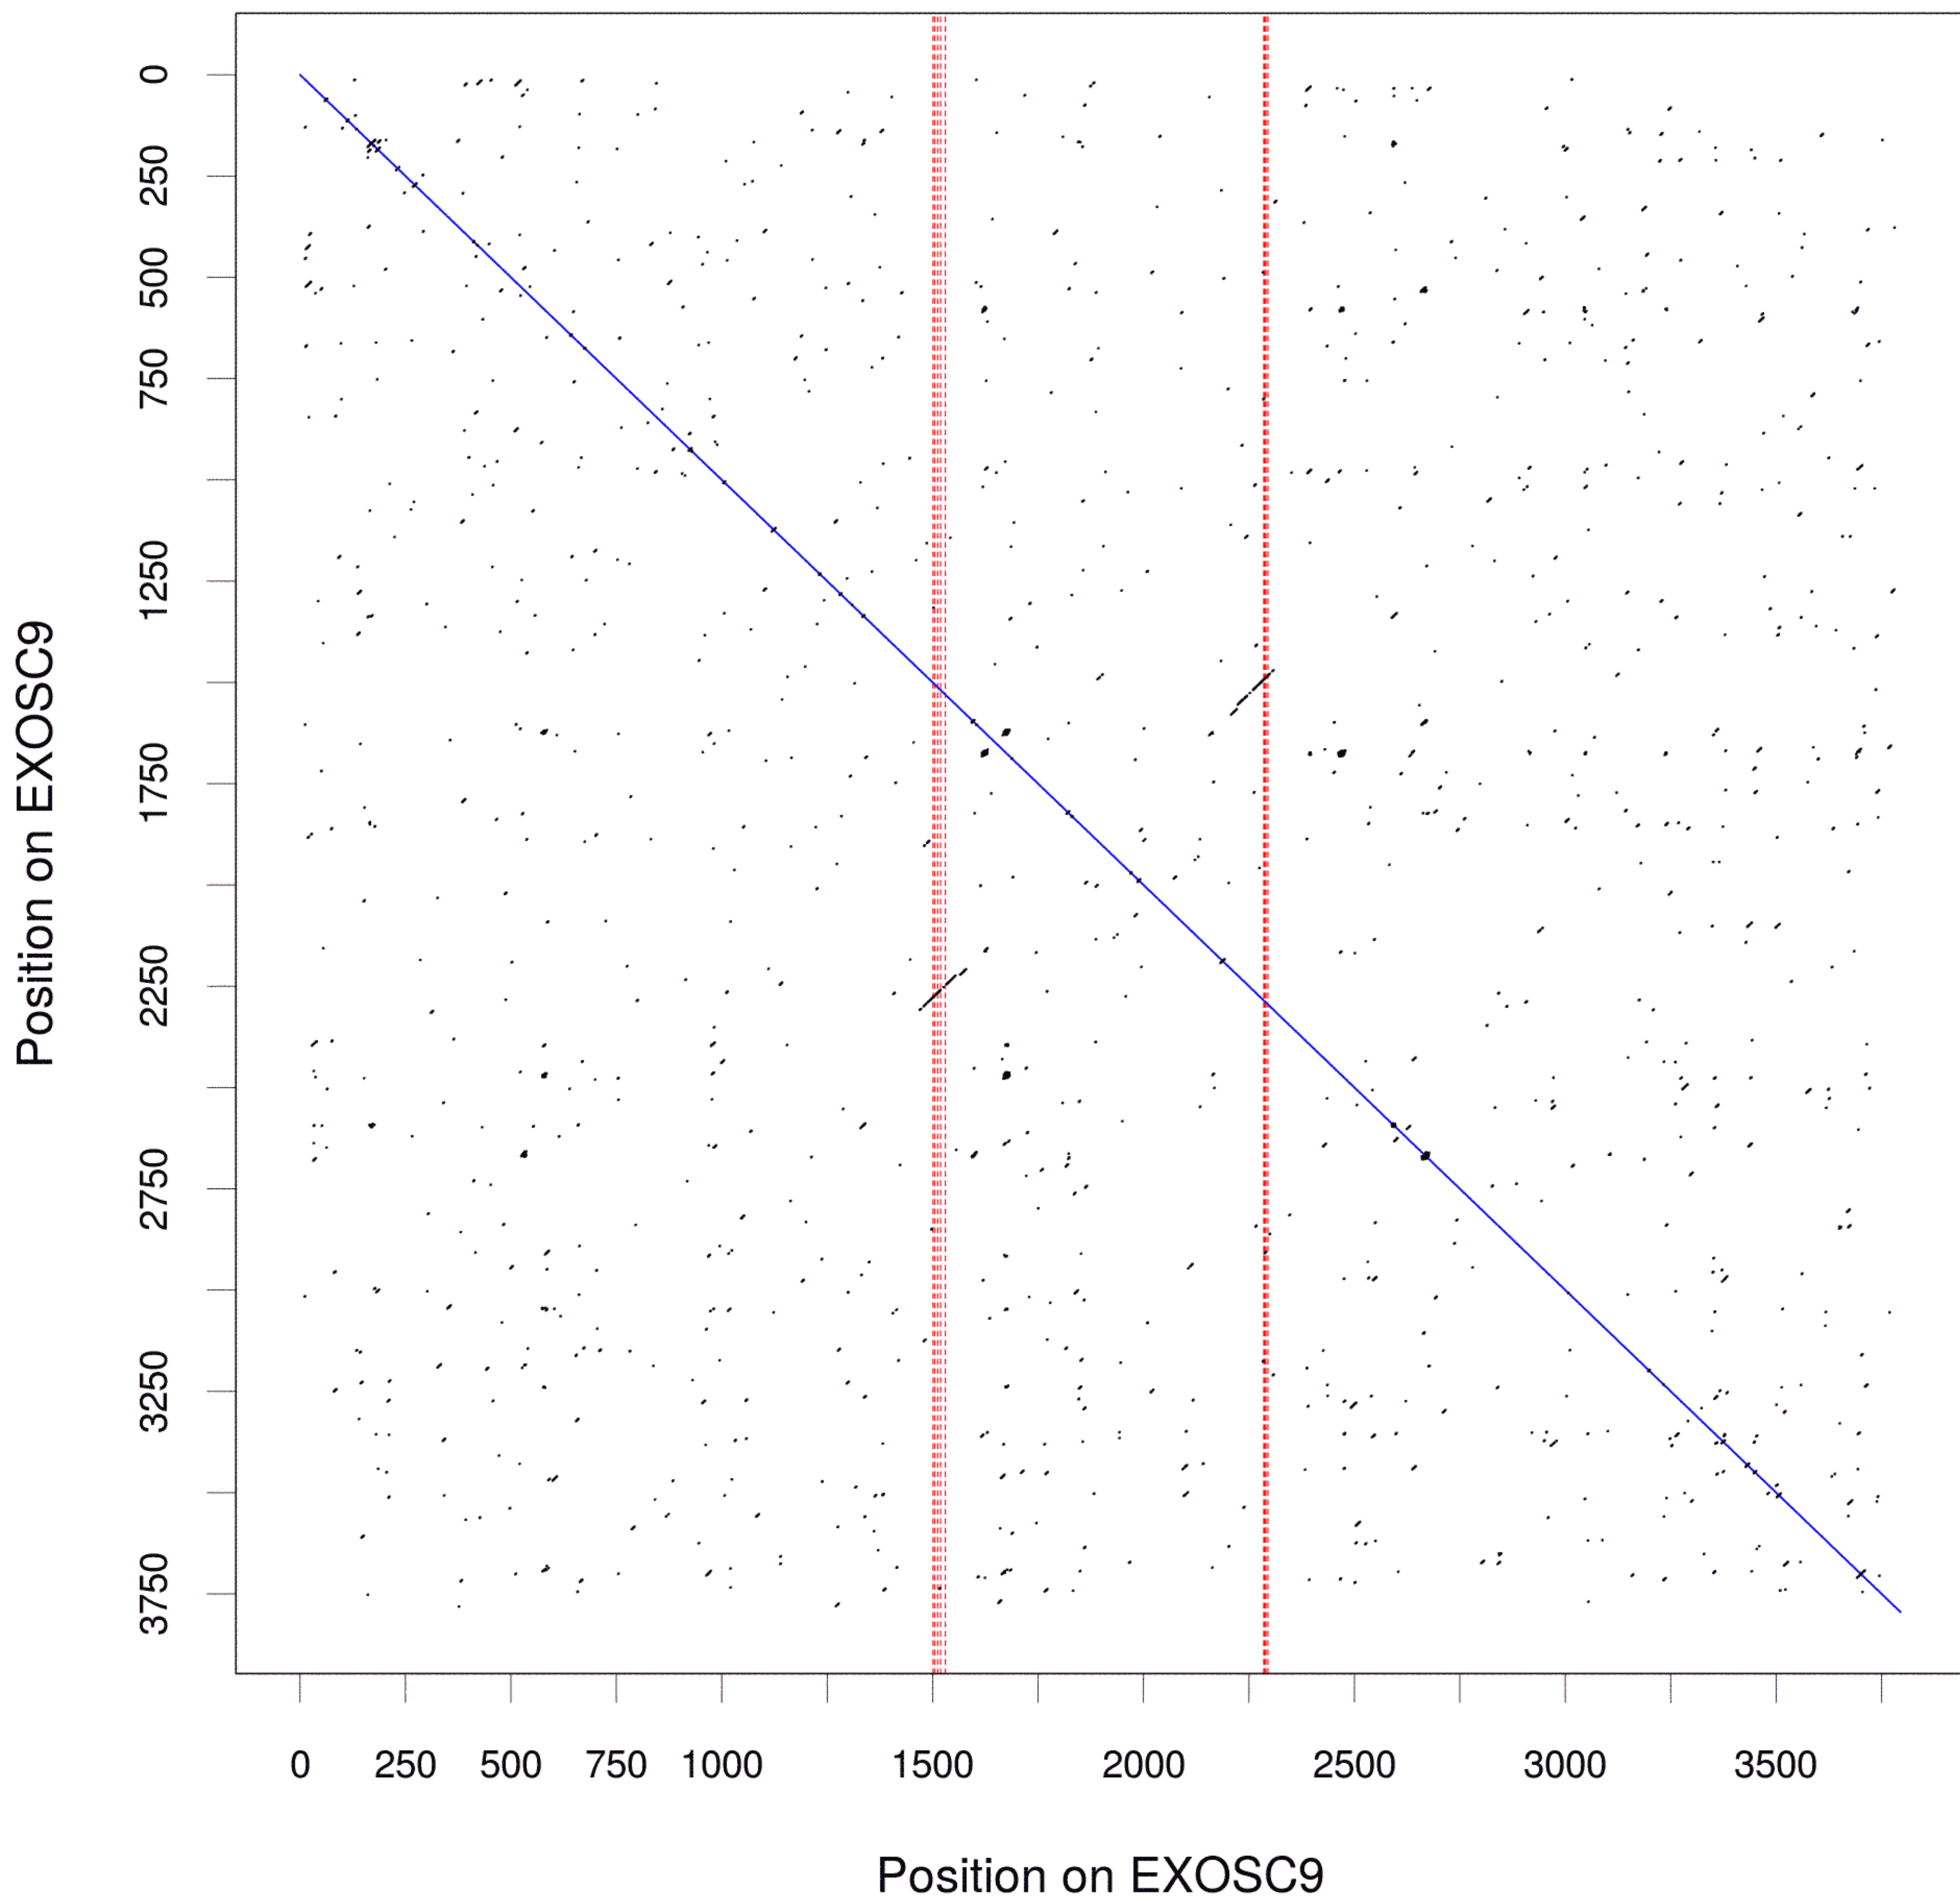

# FAM20A

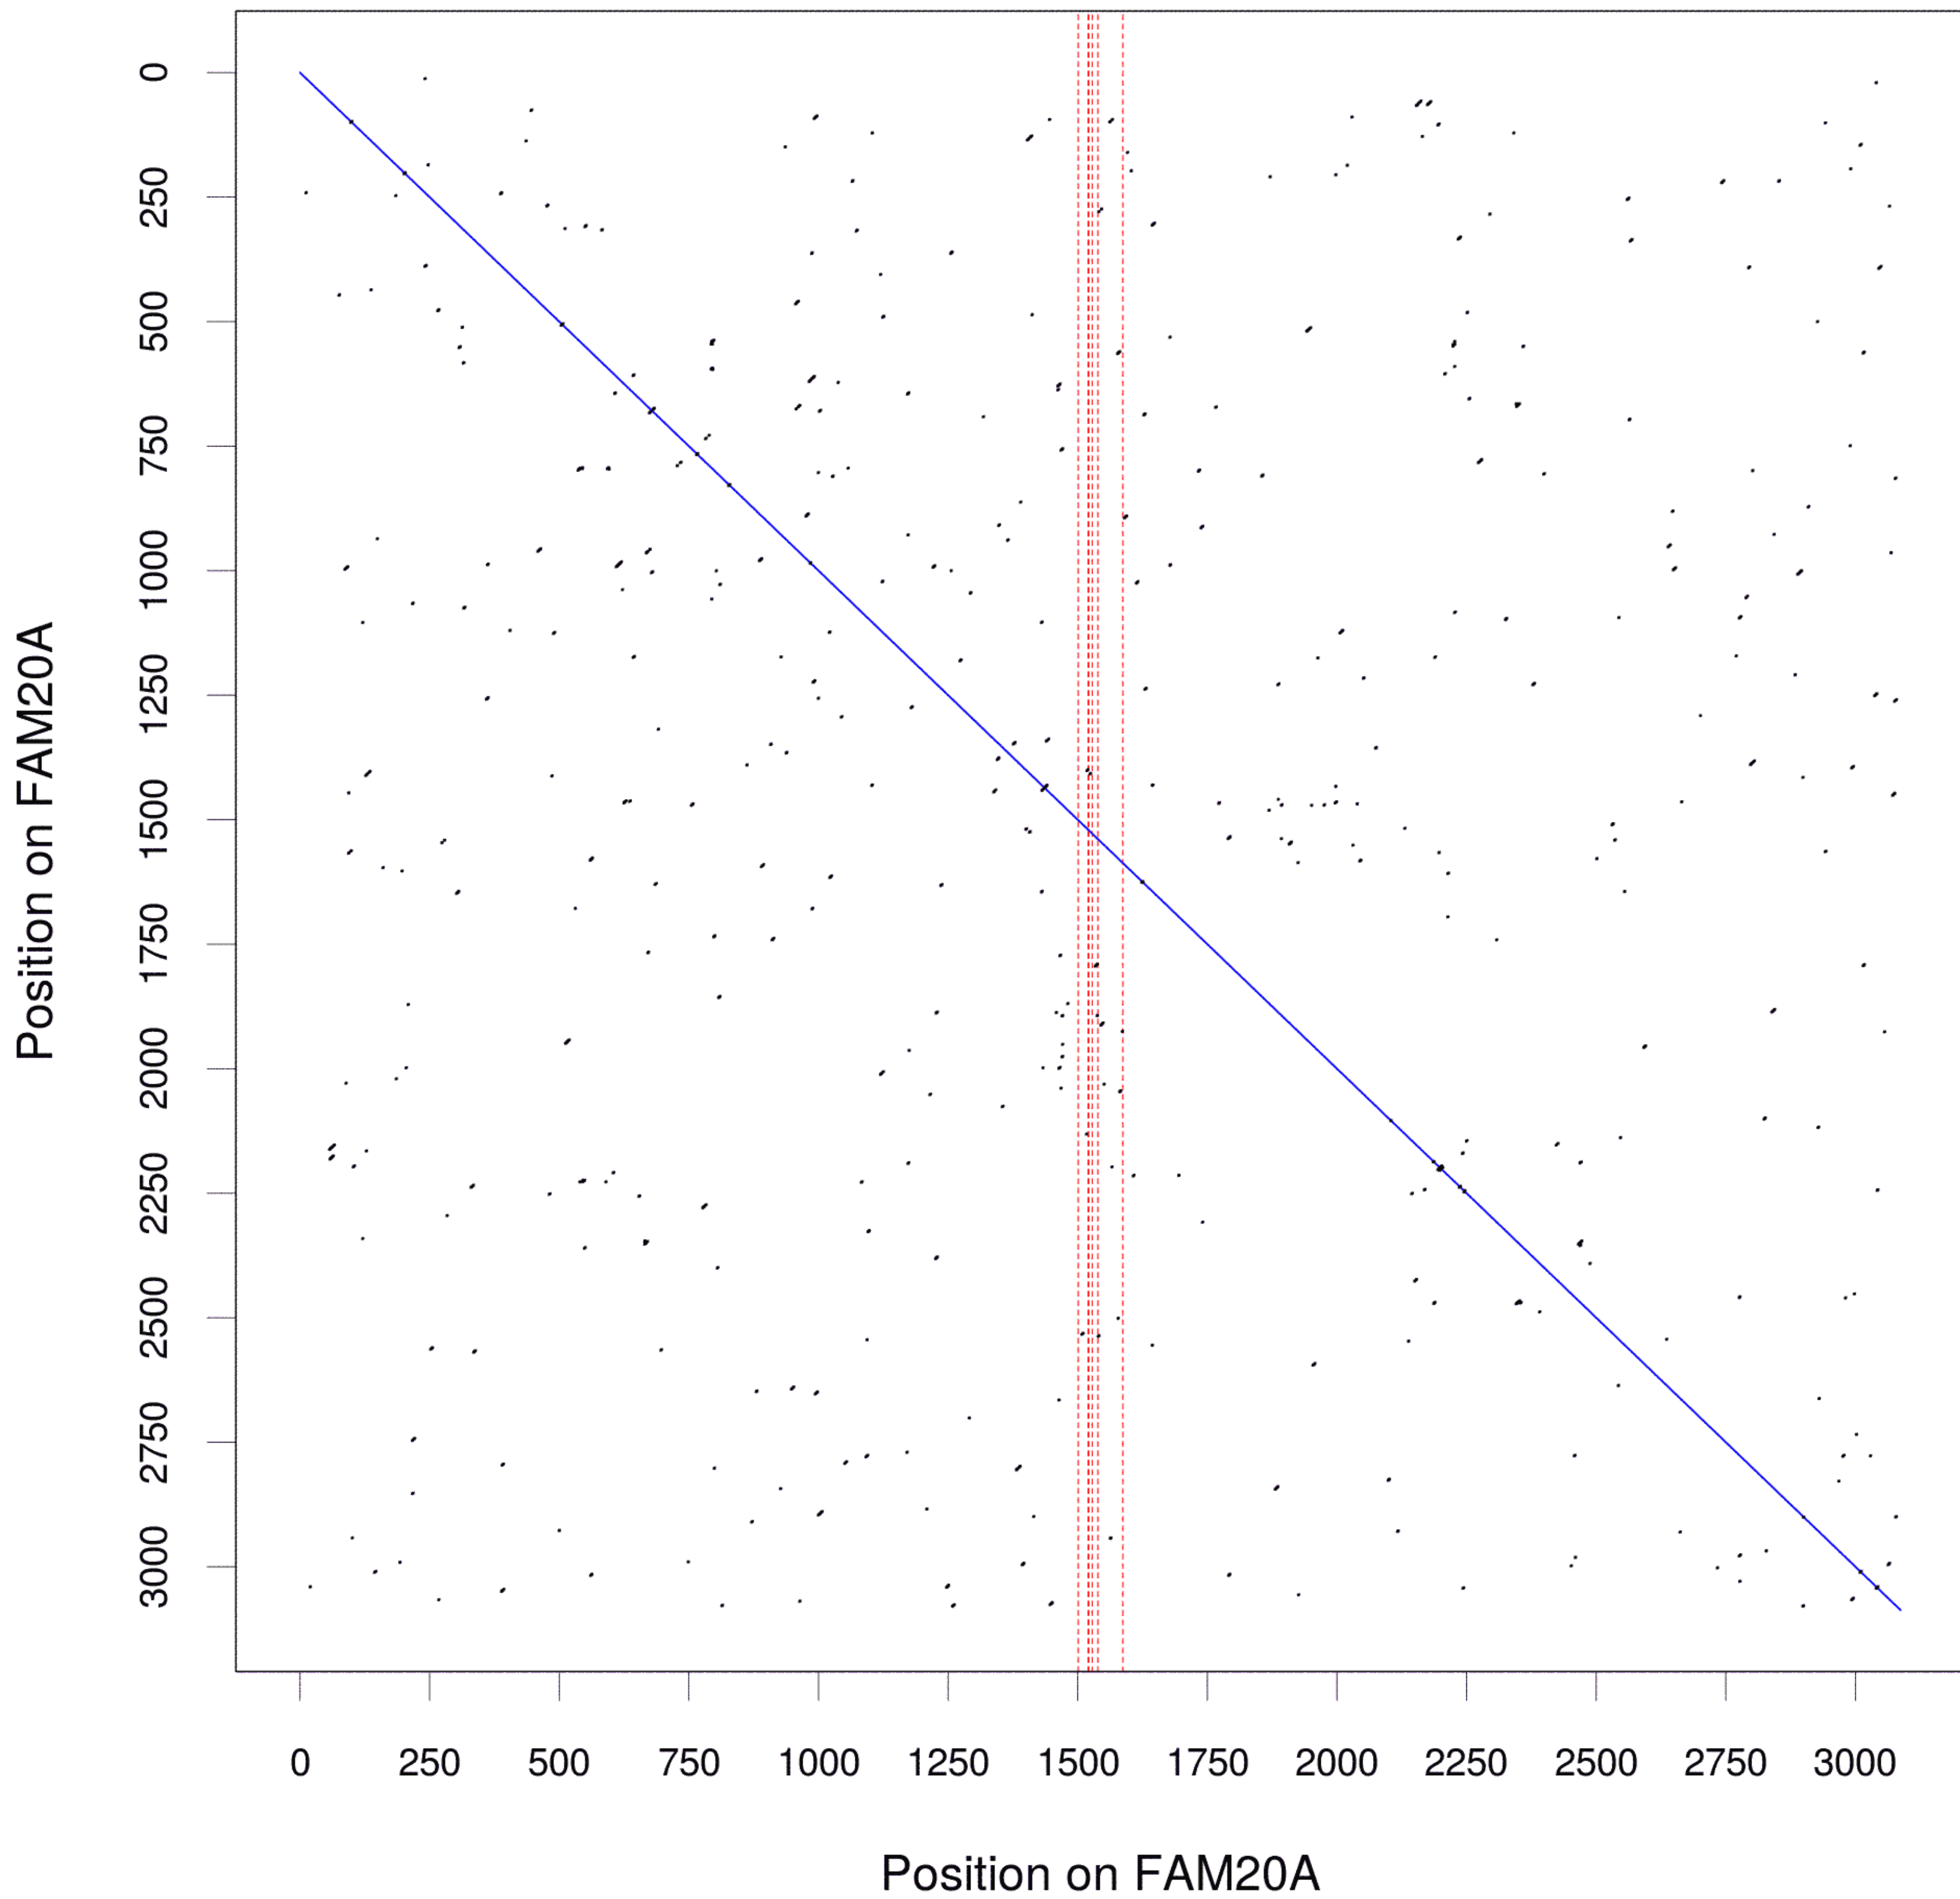

# FAM73B

Position on FAM73B

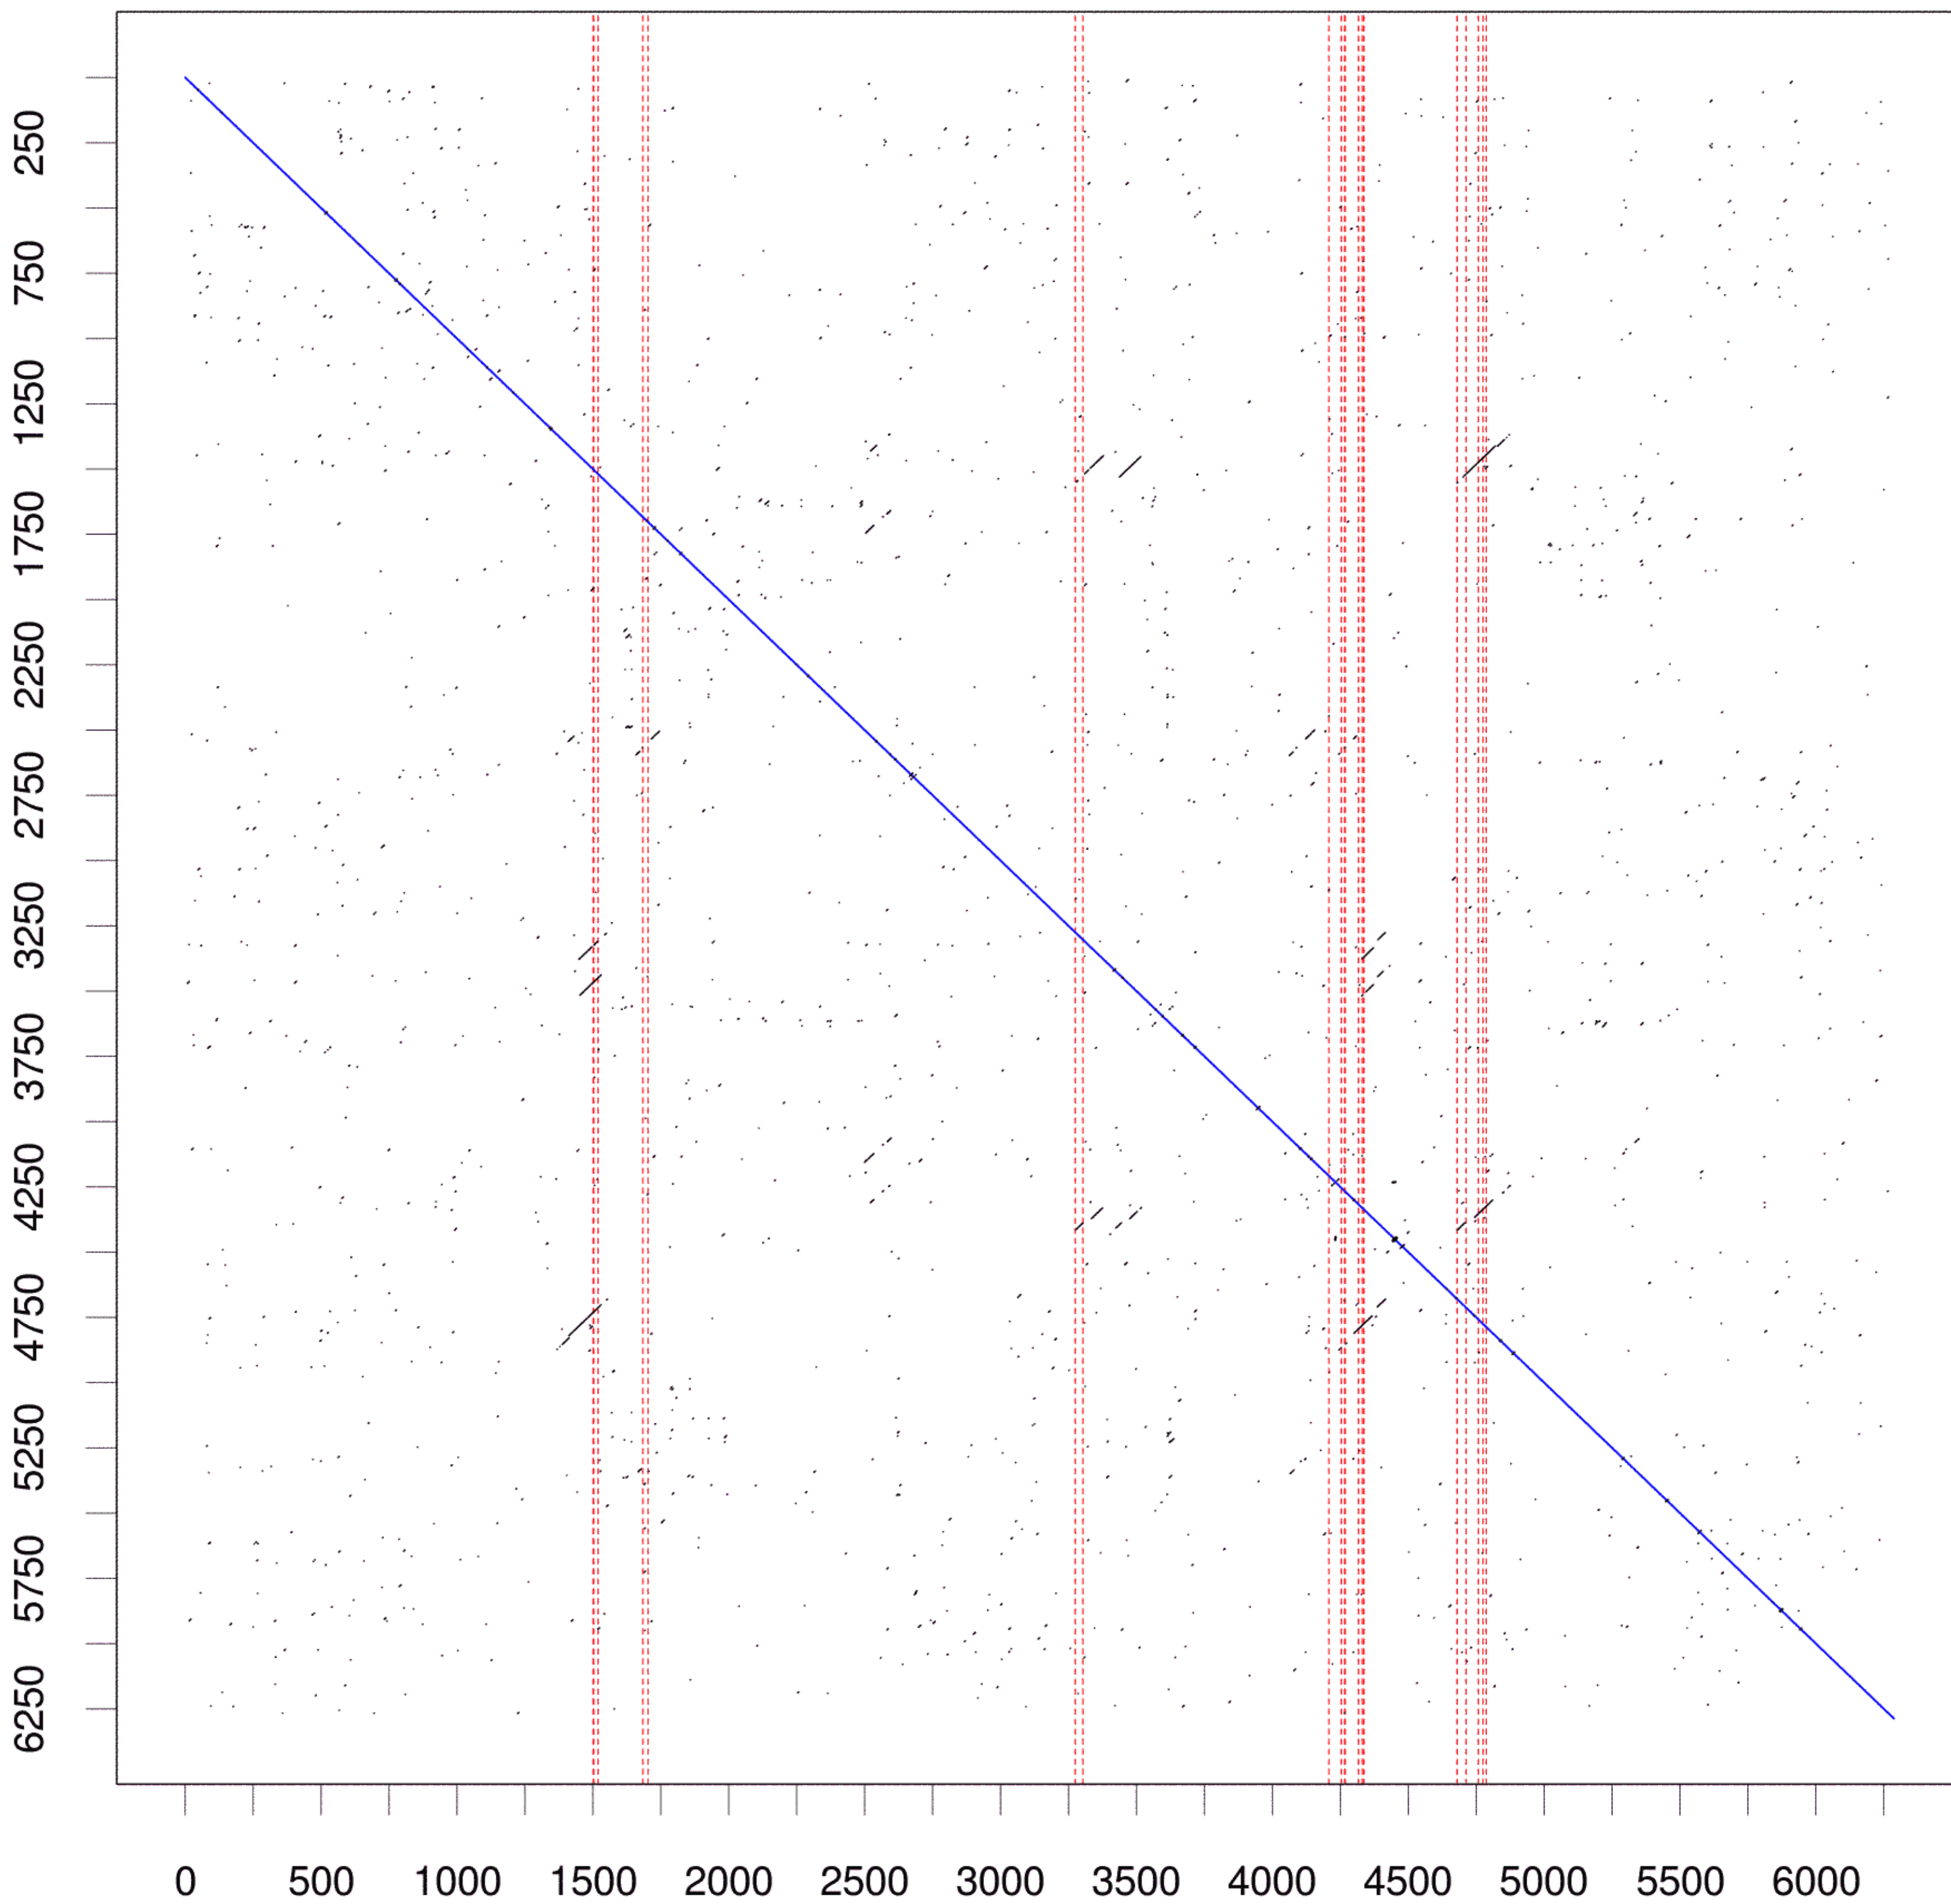

Position on FAM73B

# FAM134B

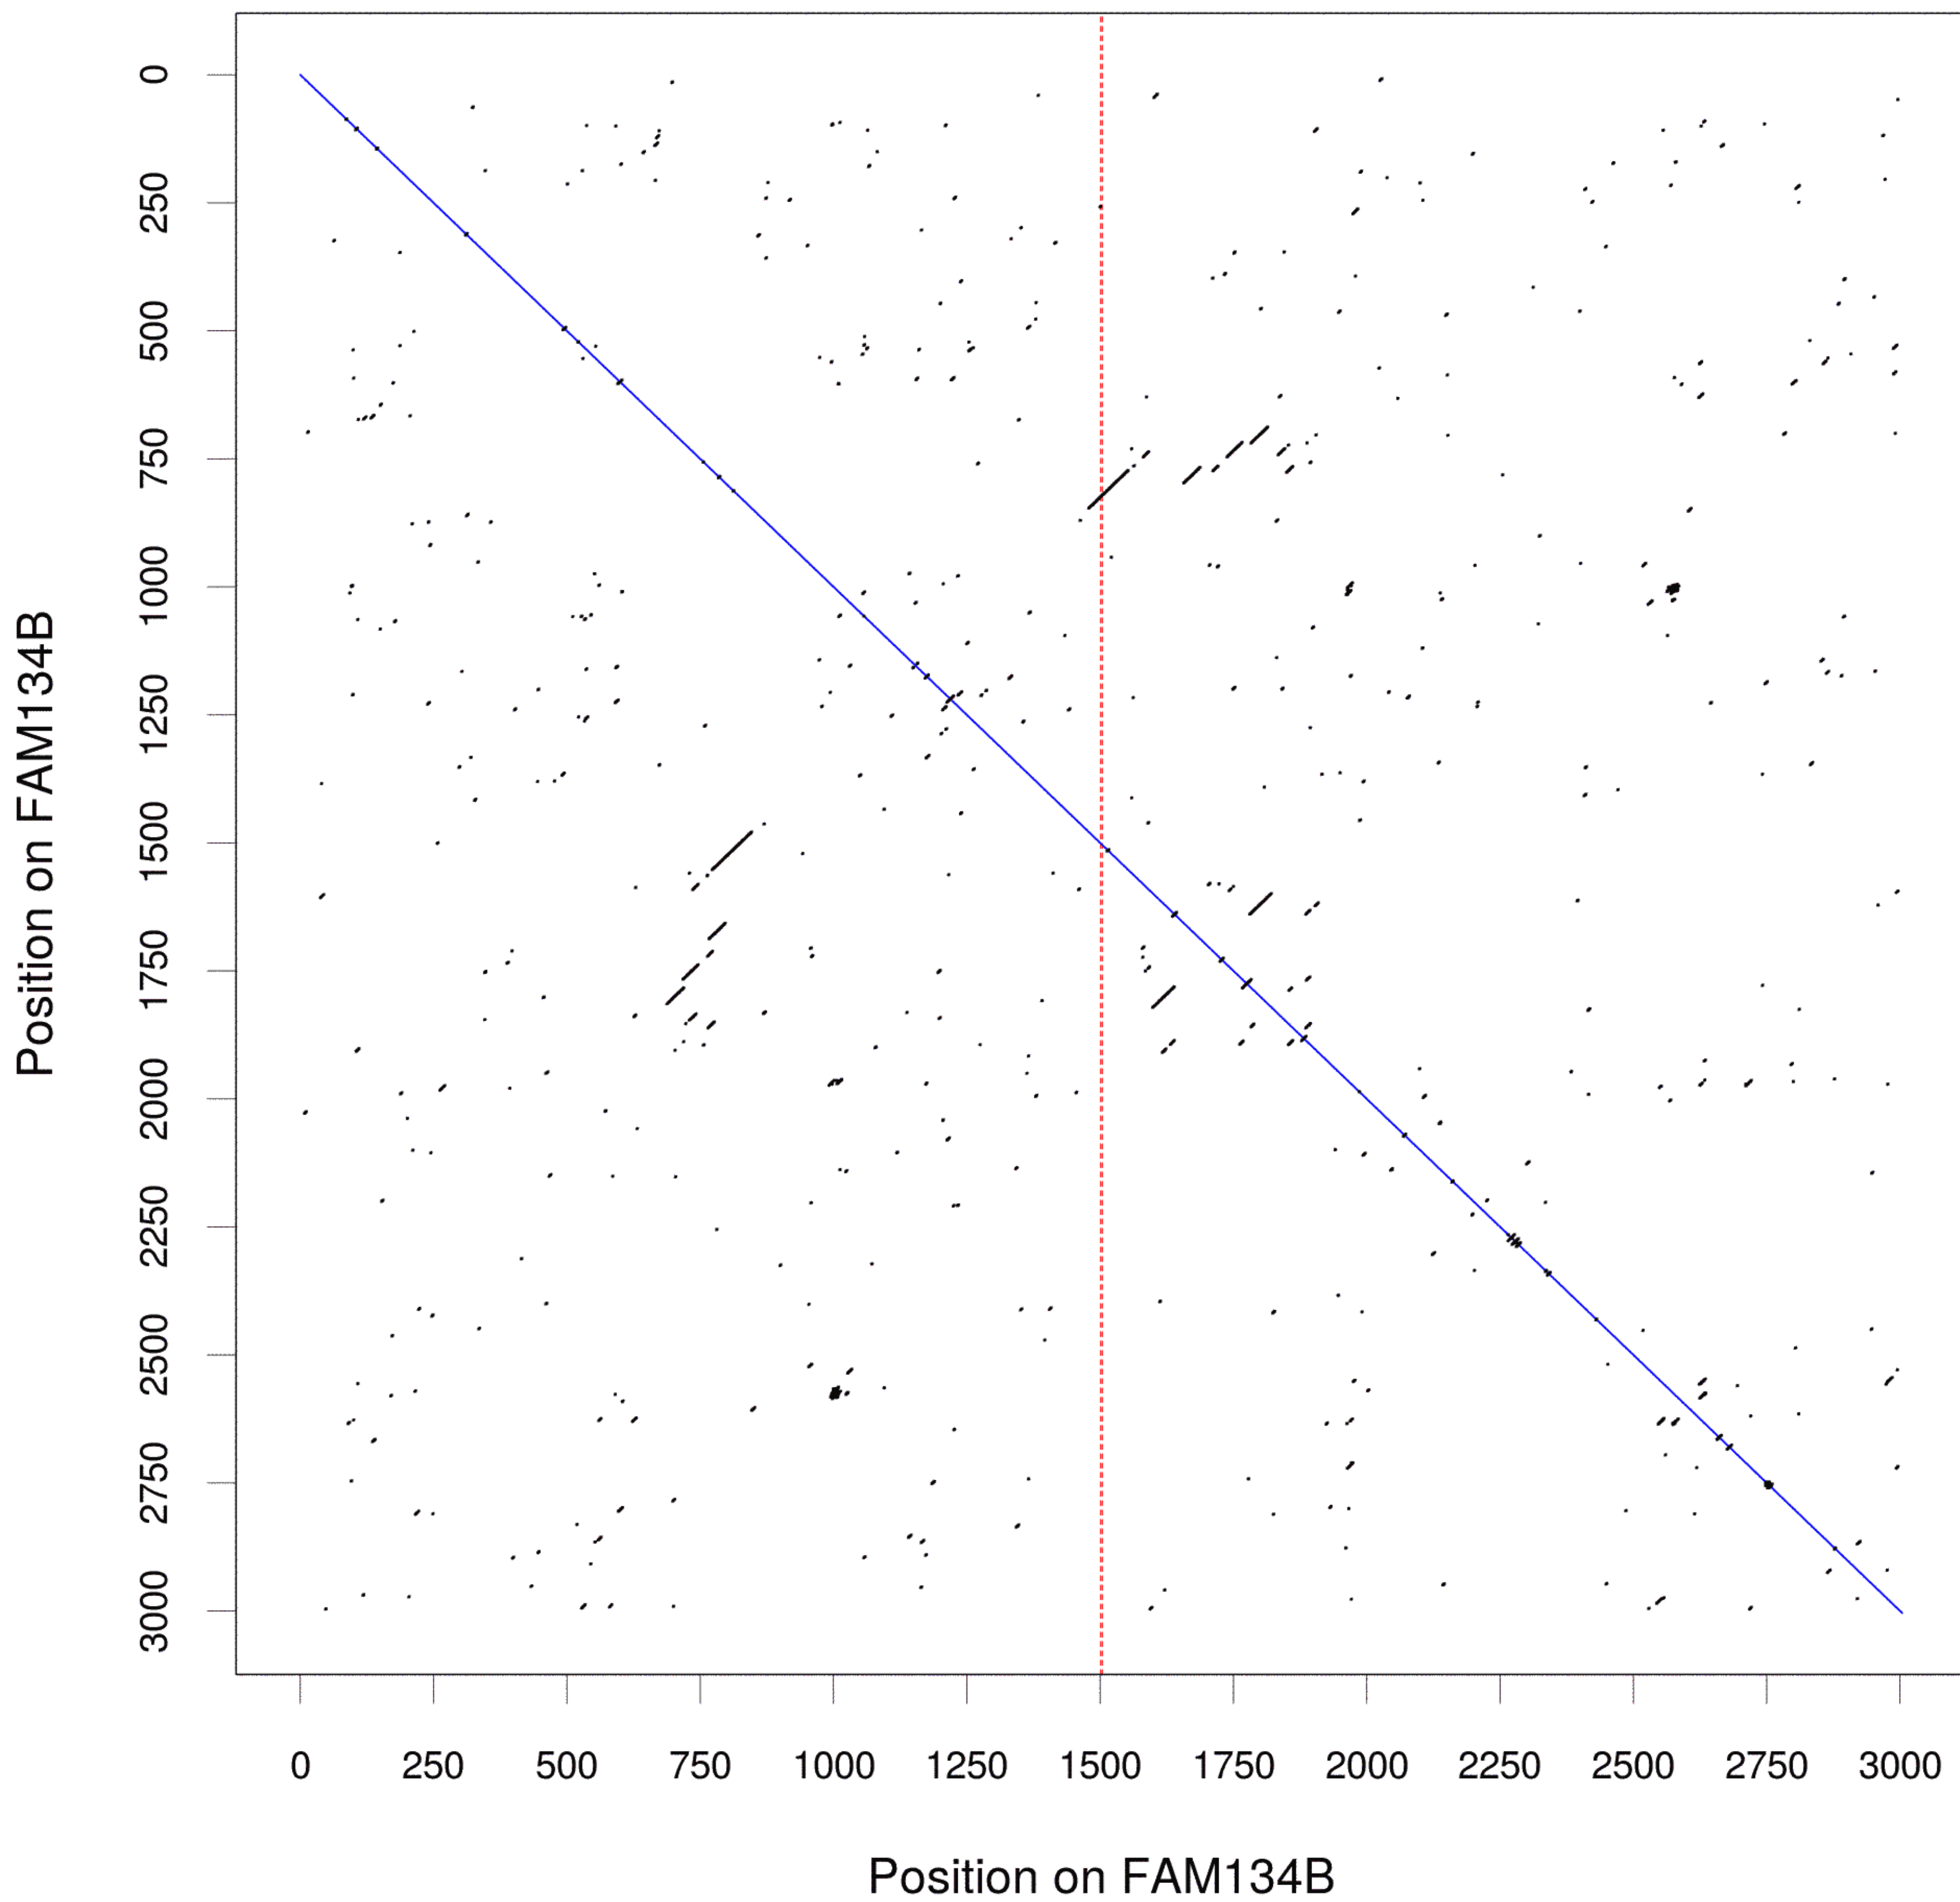

# FASTK

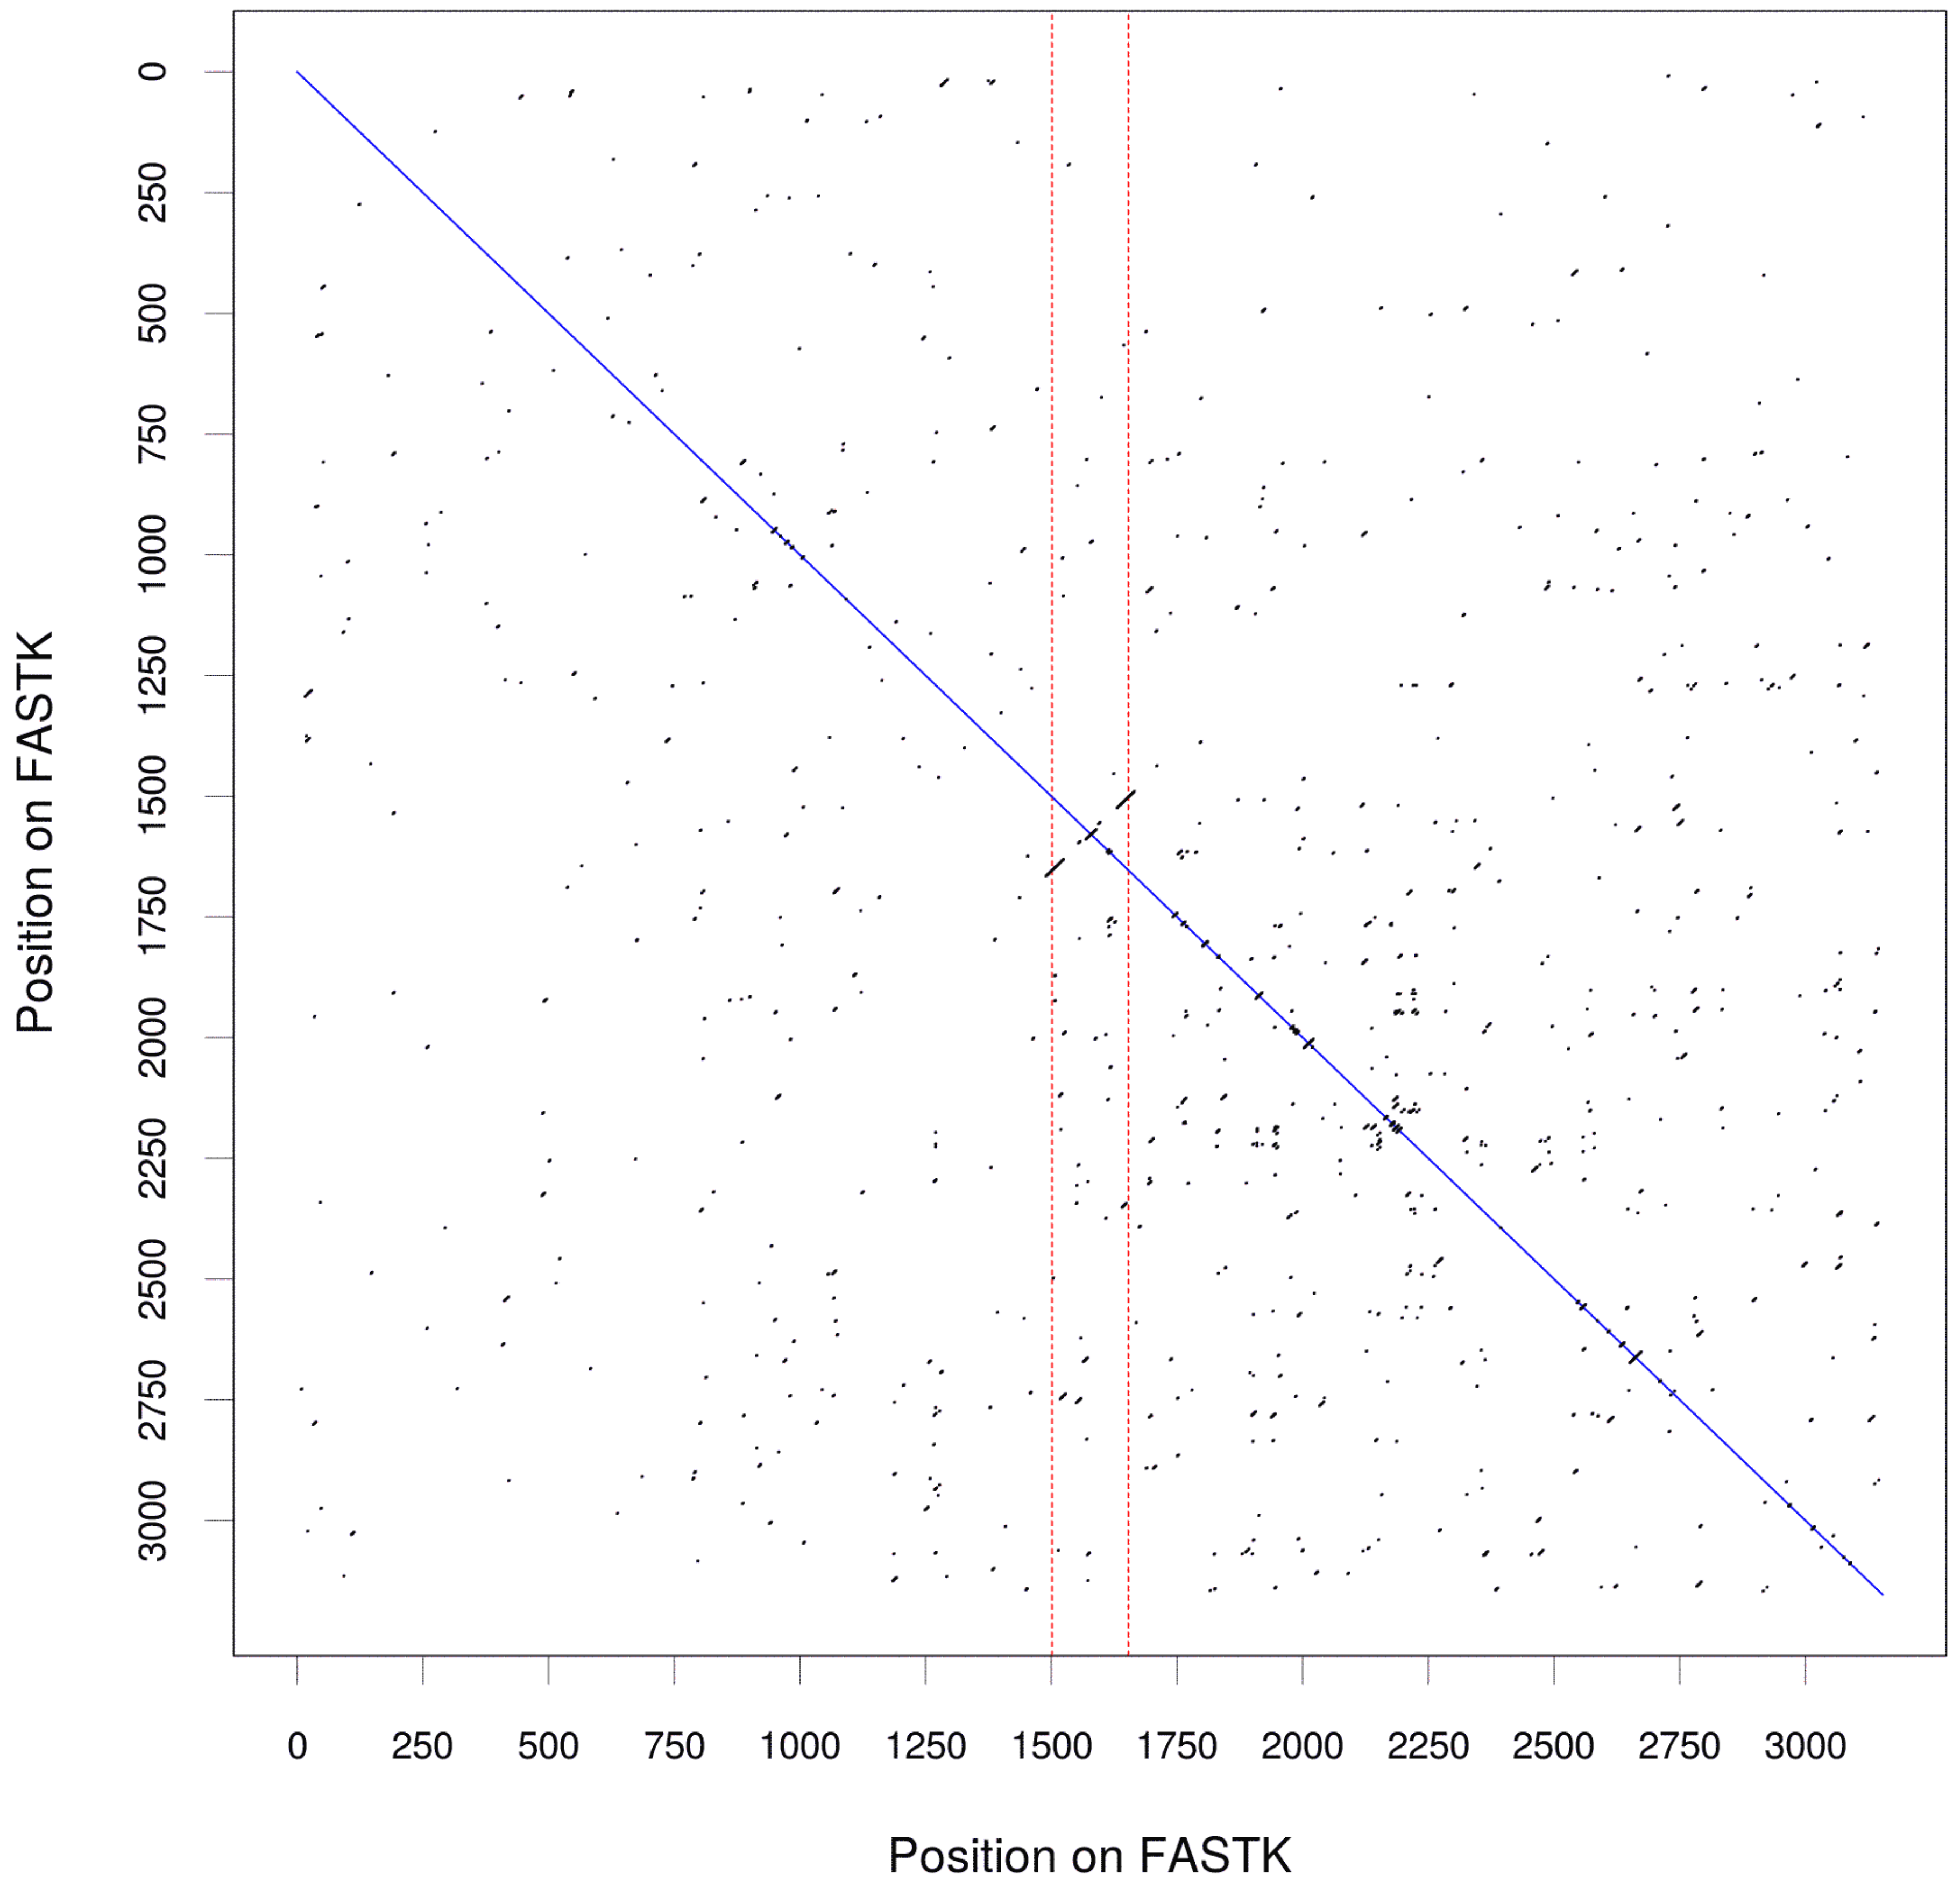



# FBXW8

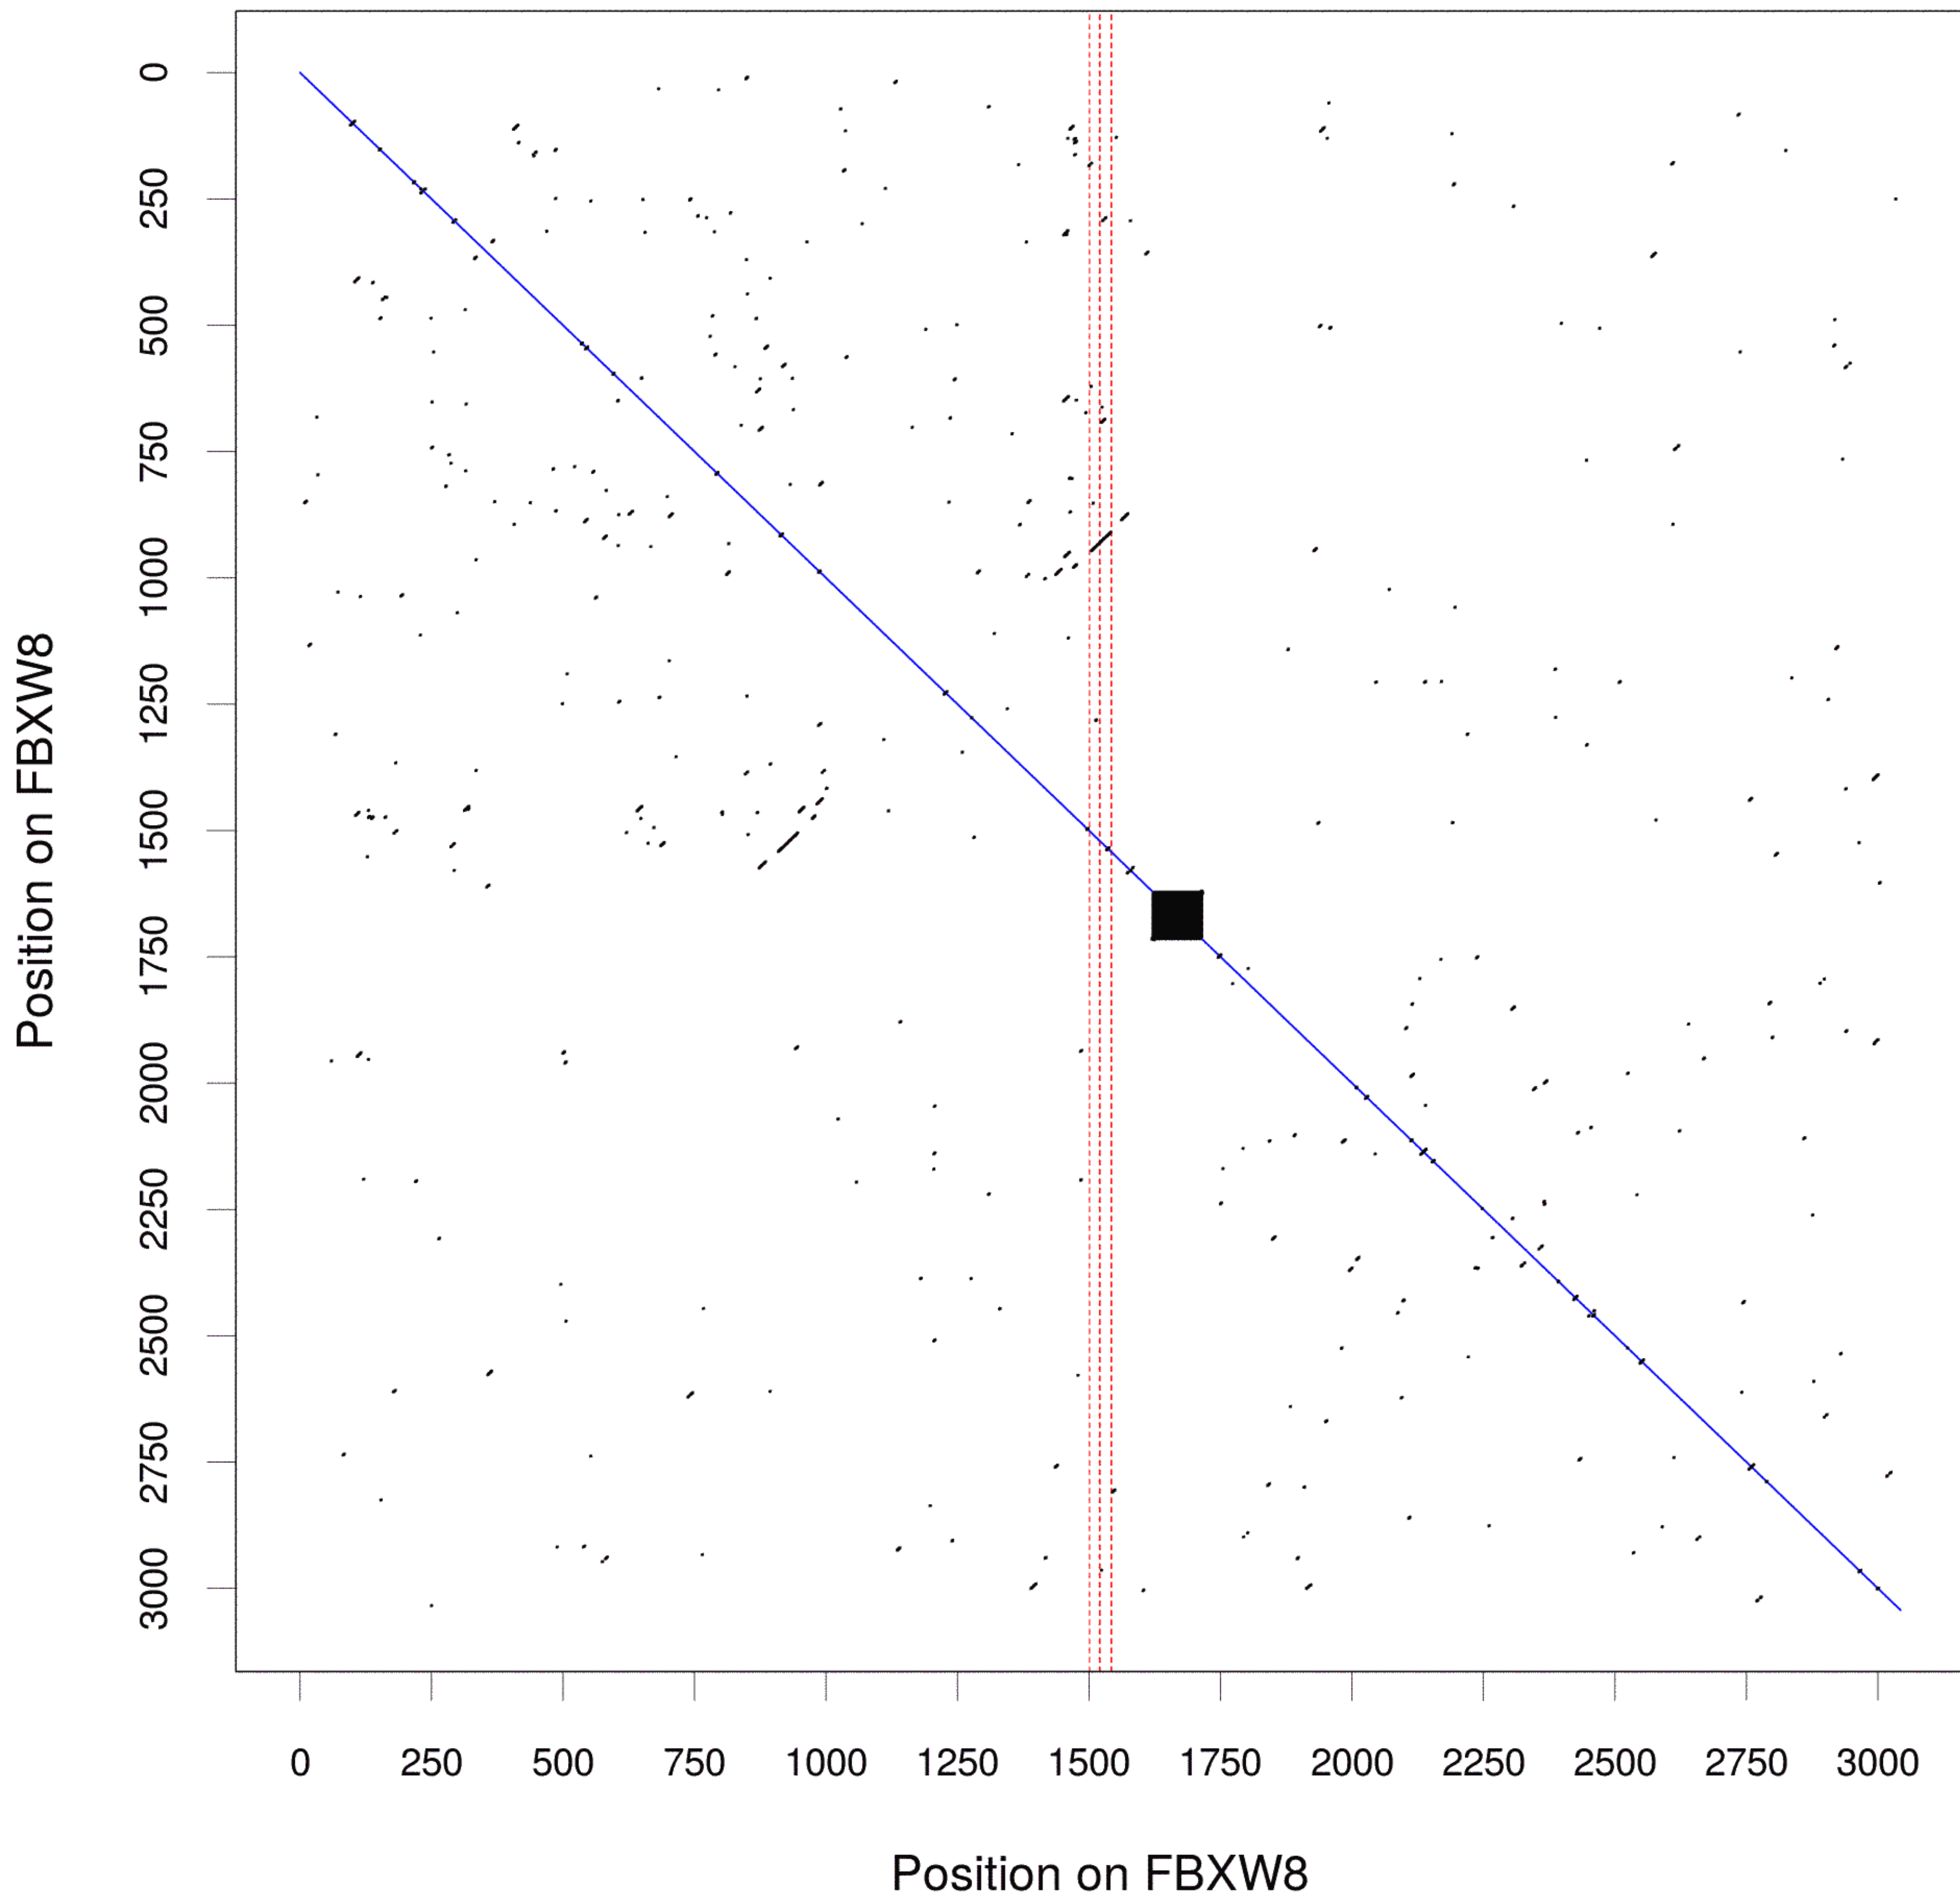

# FBXW12

Position on FBXW12

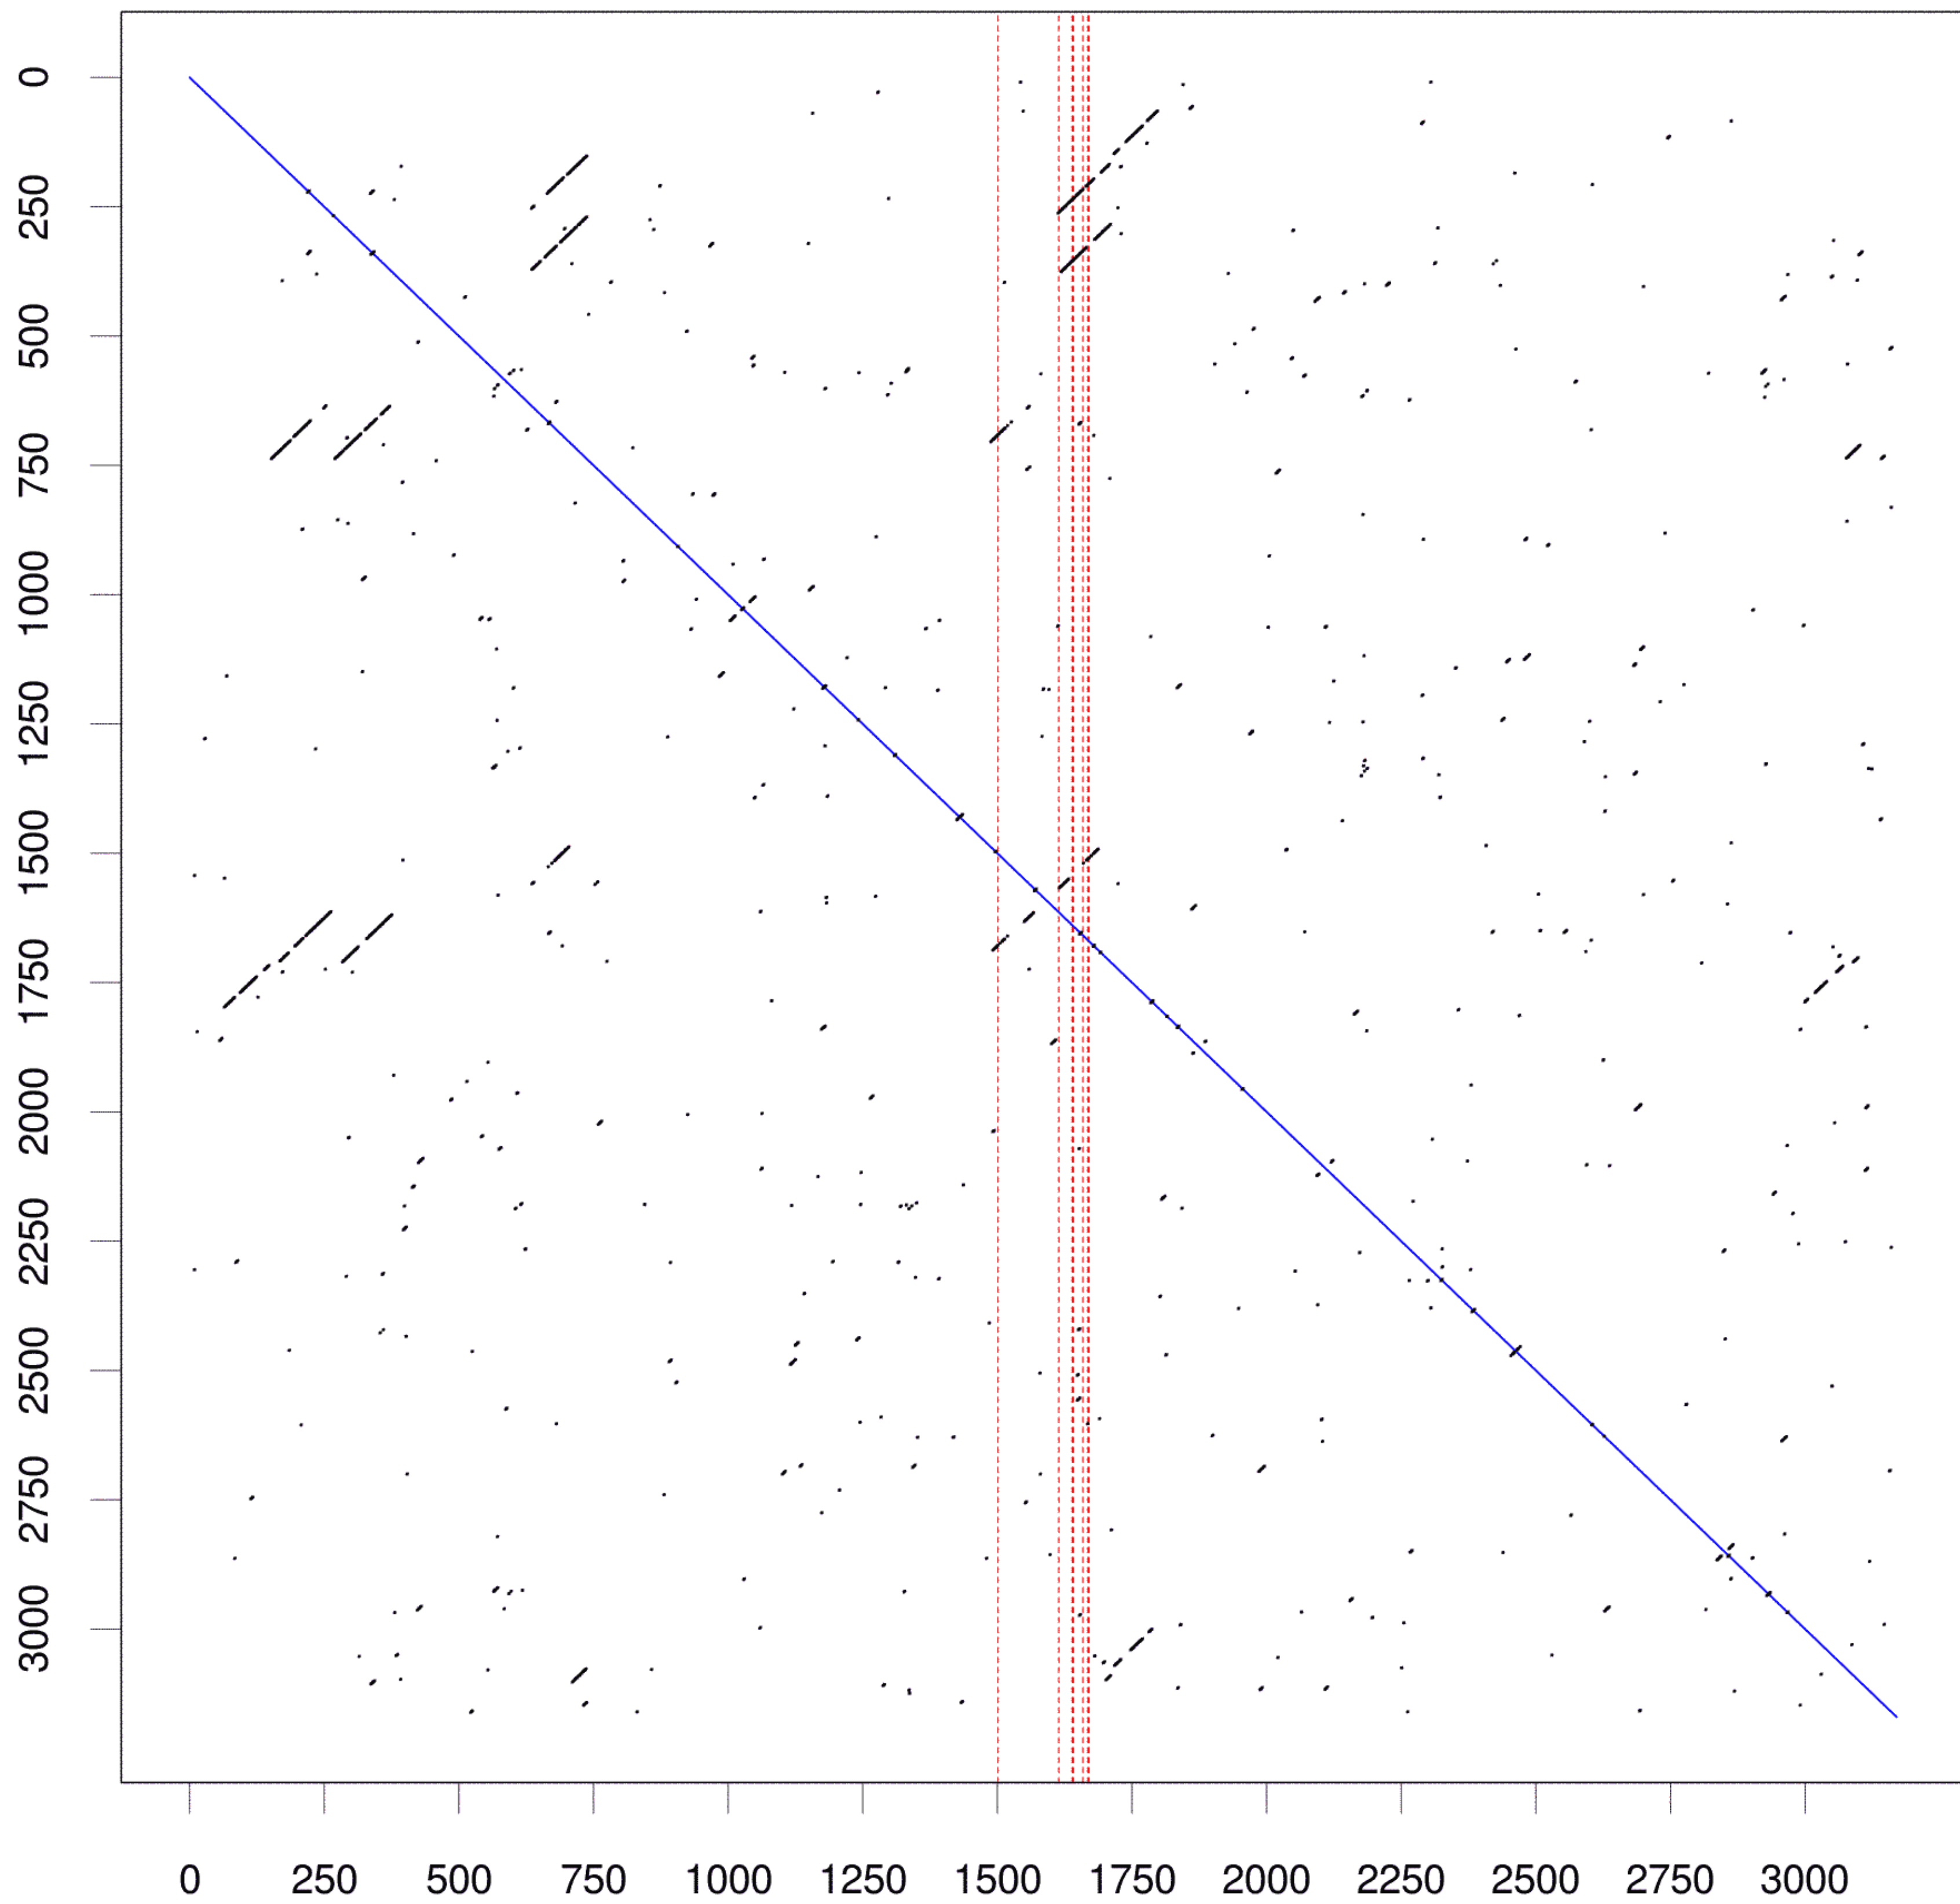

Position on FBXW12

# FGF2

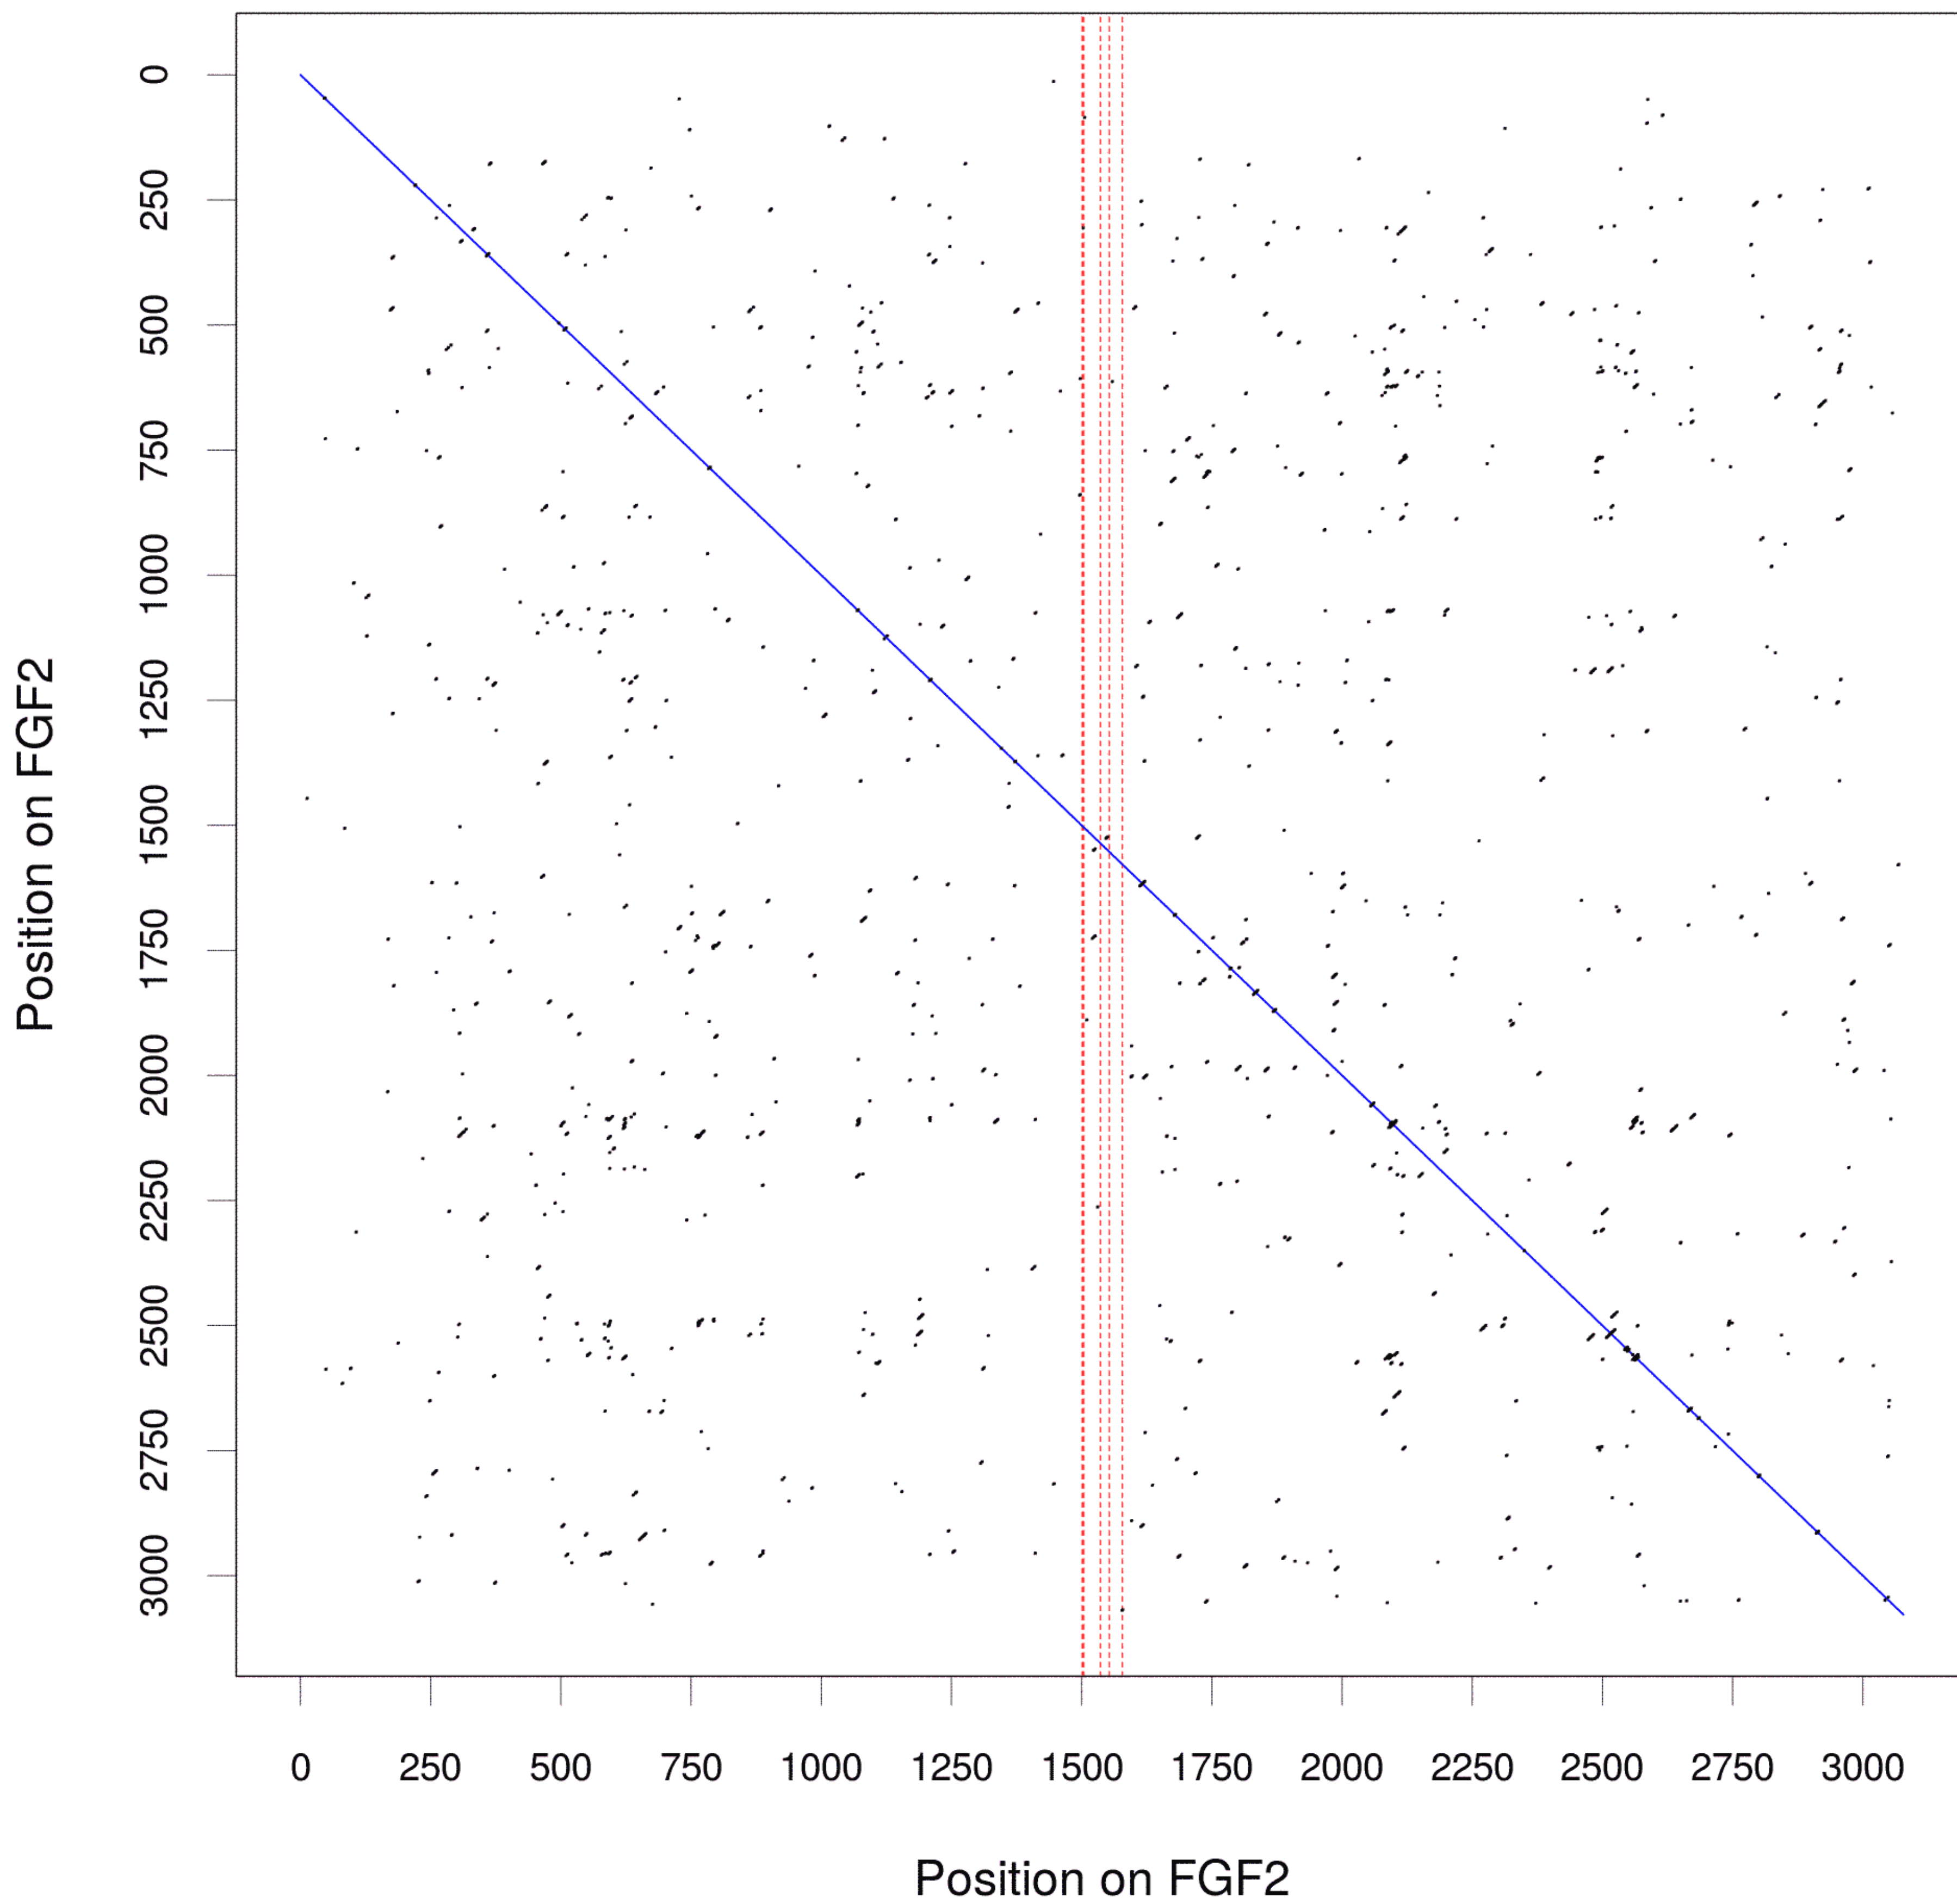

# FUT11

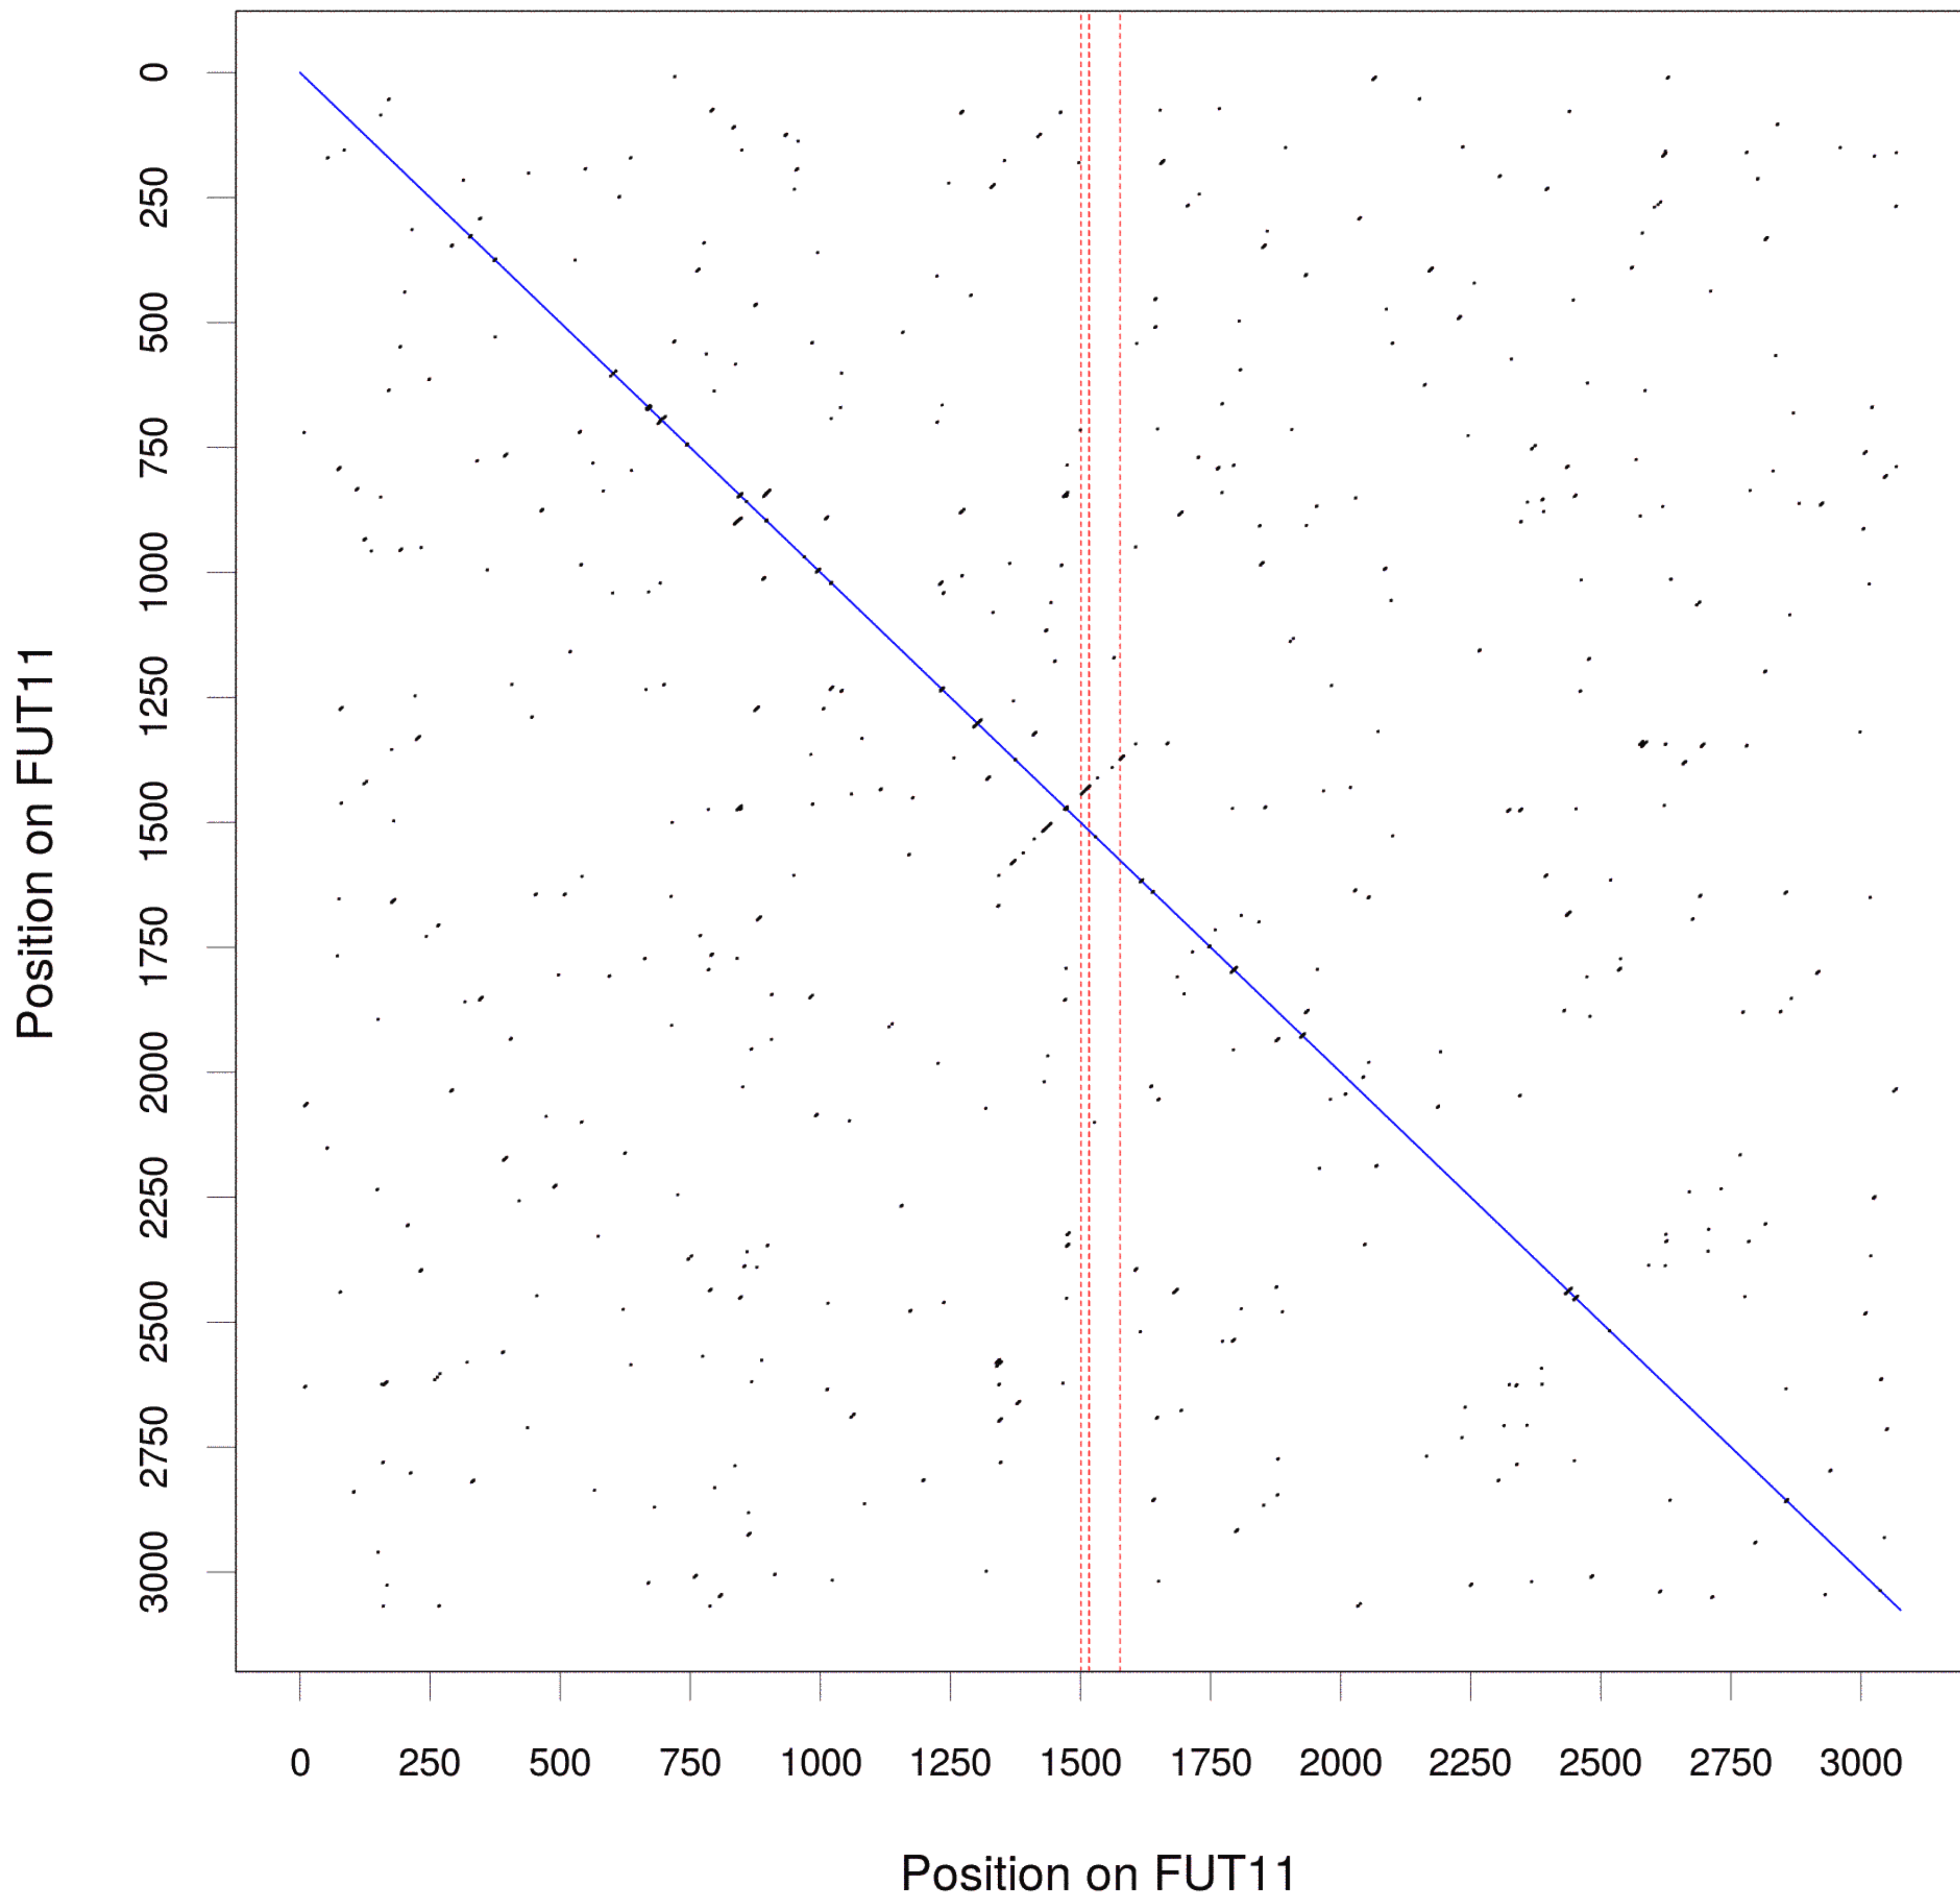

# GBAS

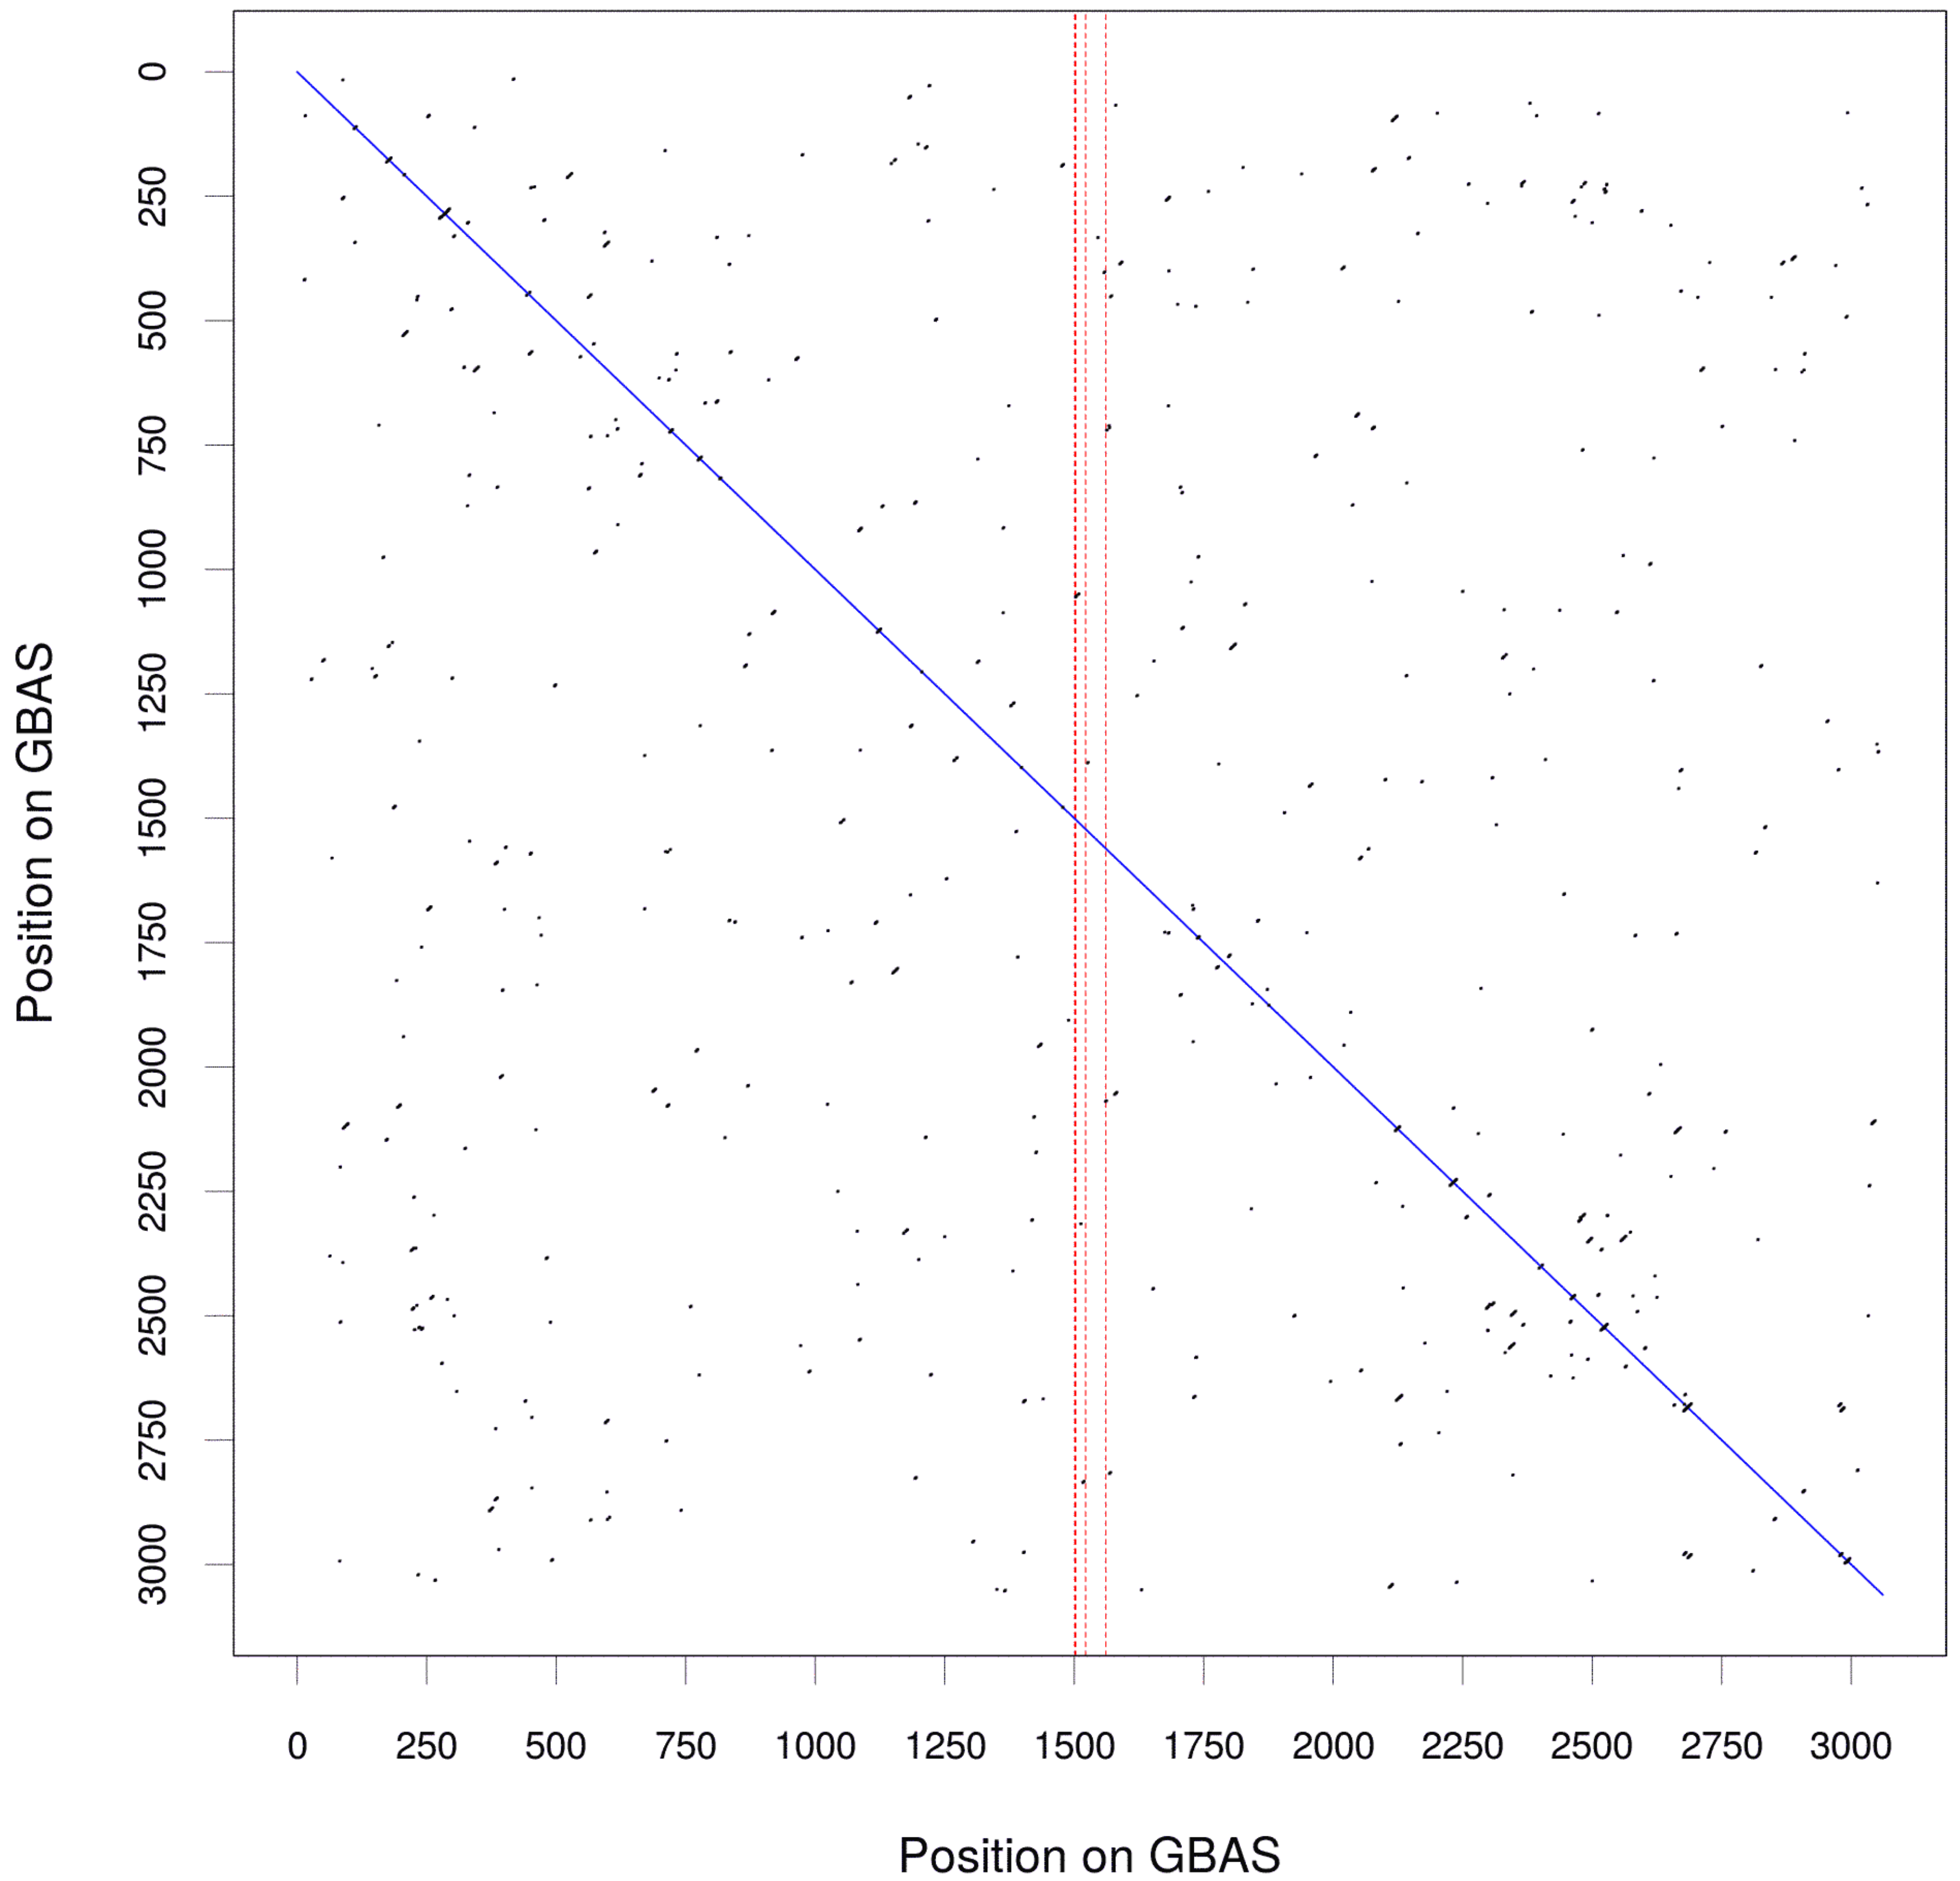

# GGCX

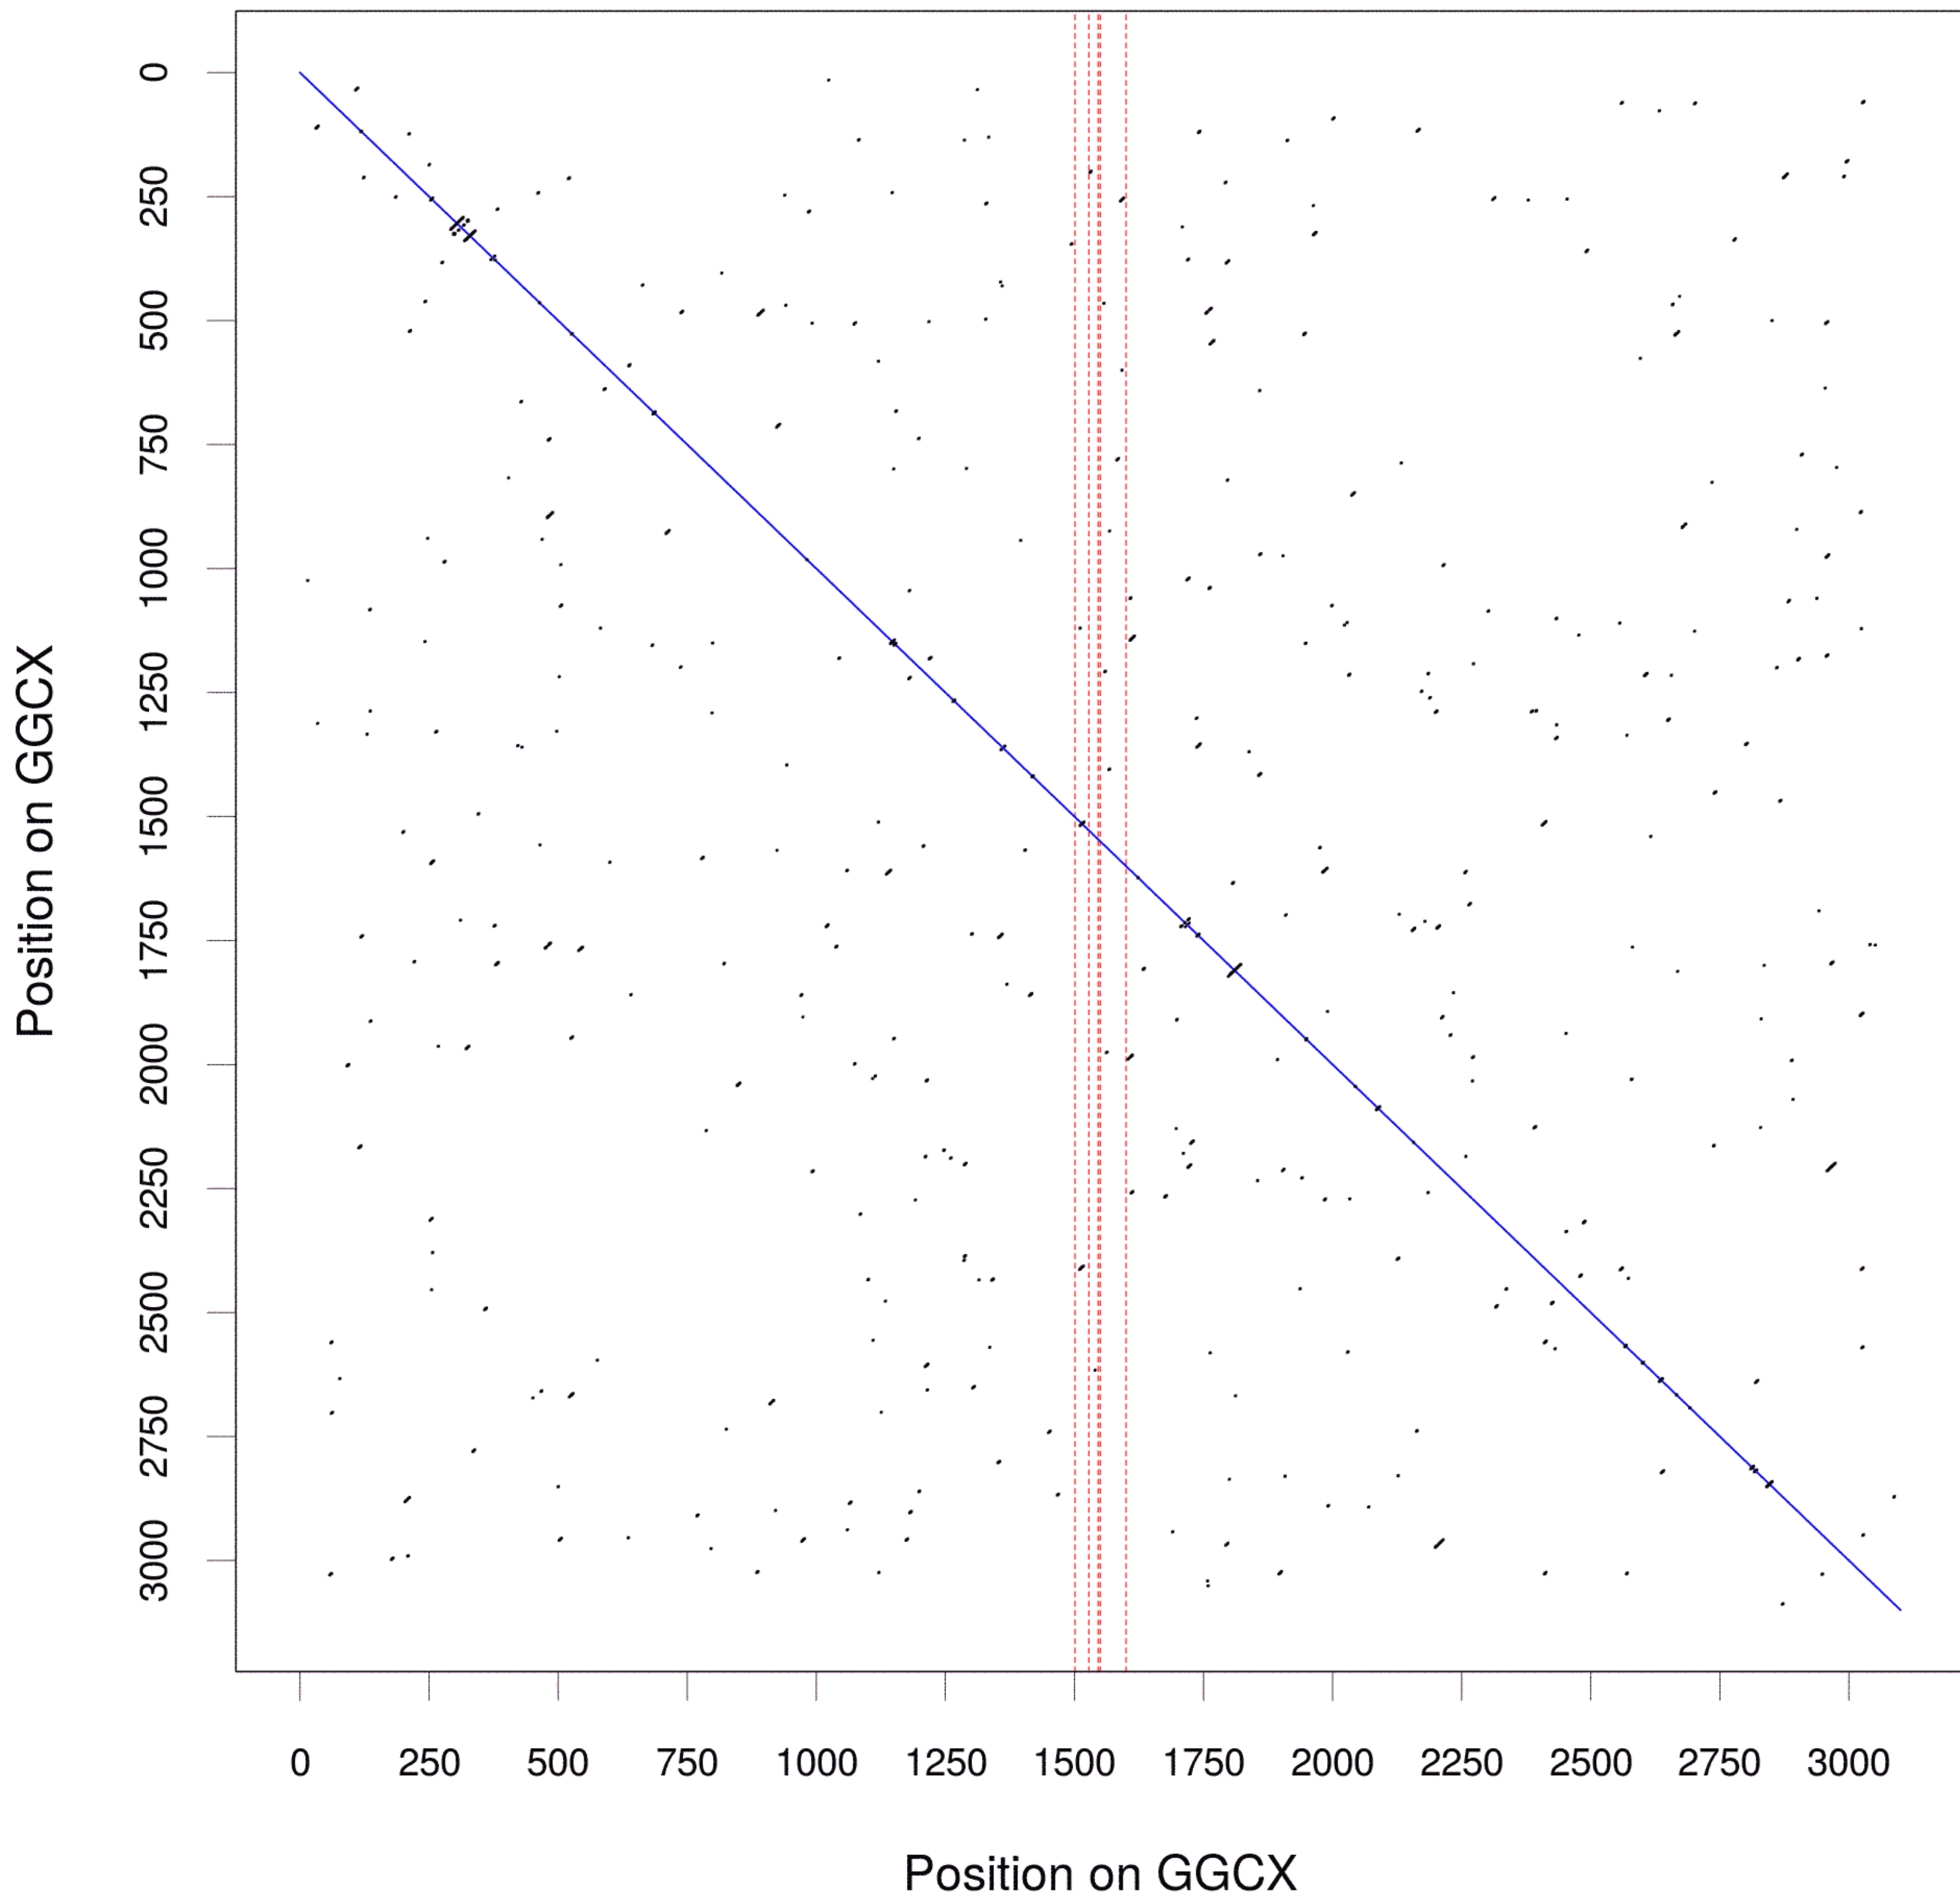

# GGT1

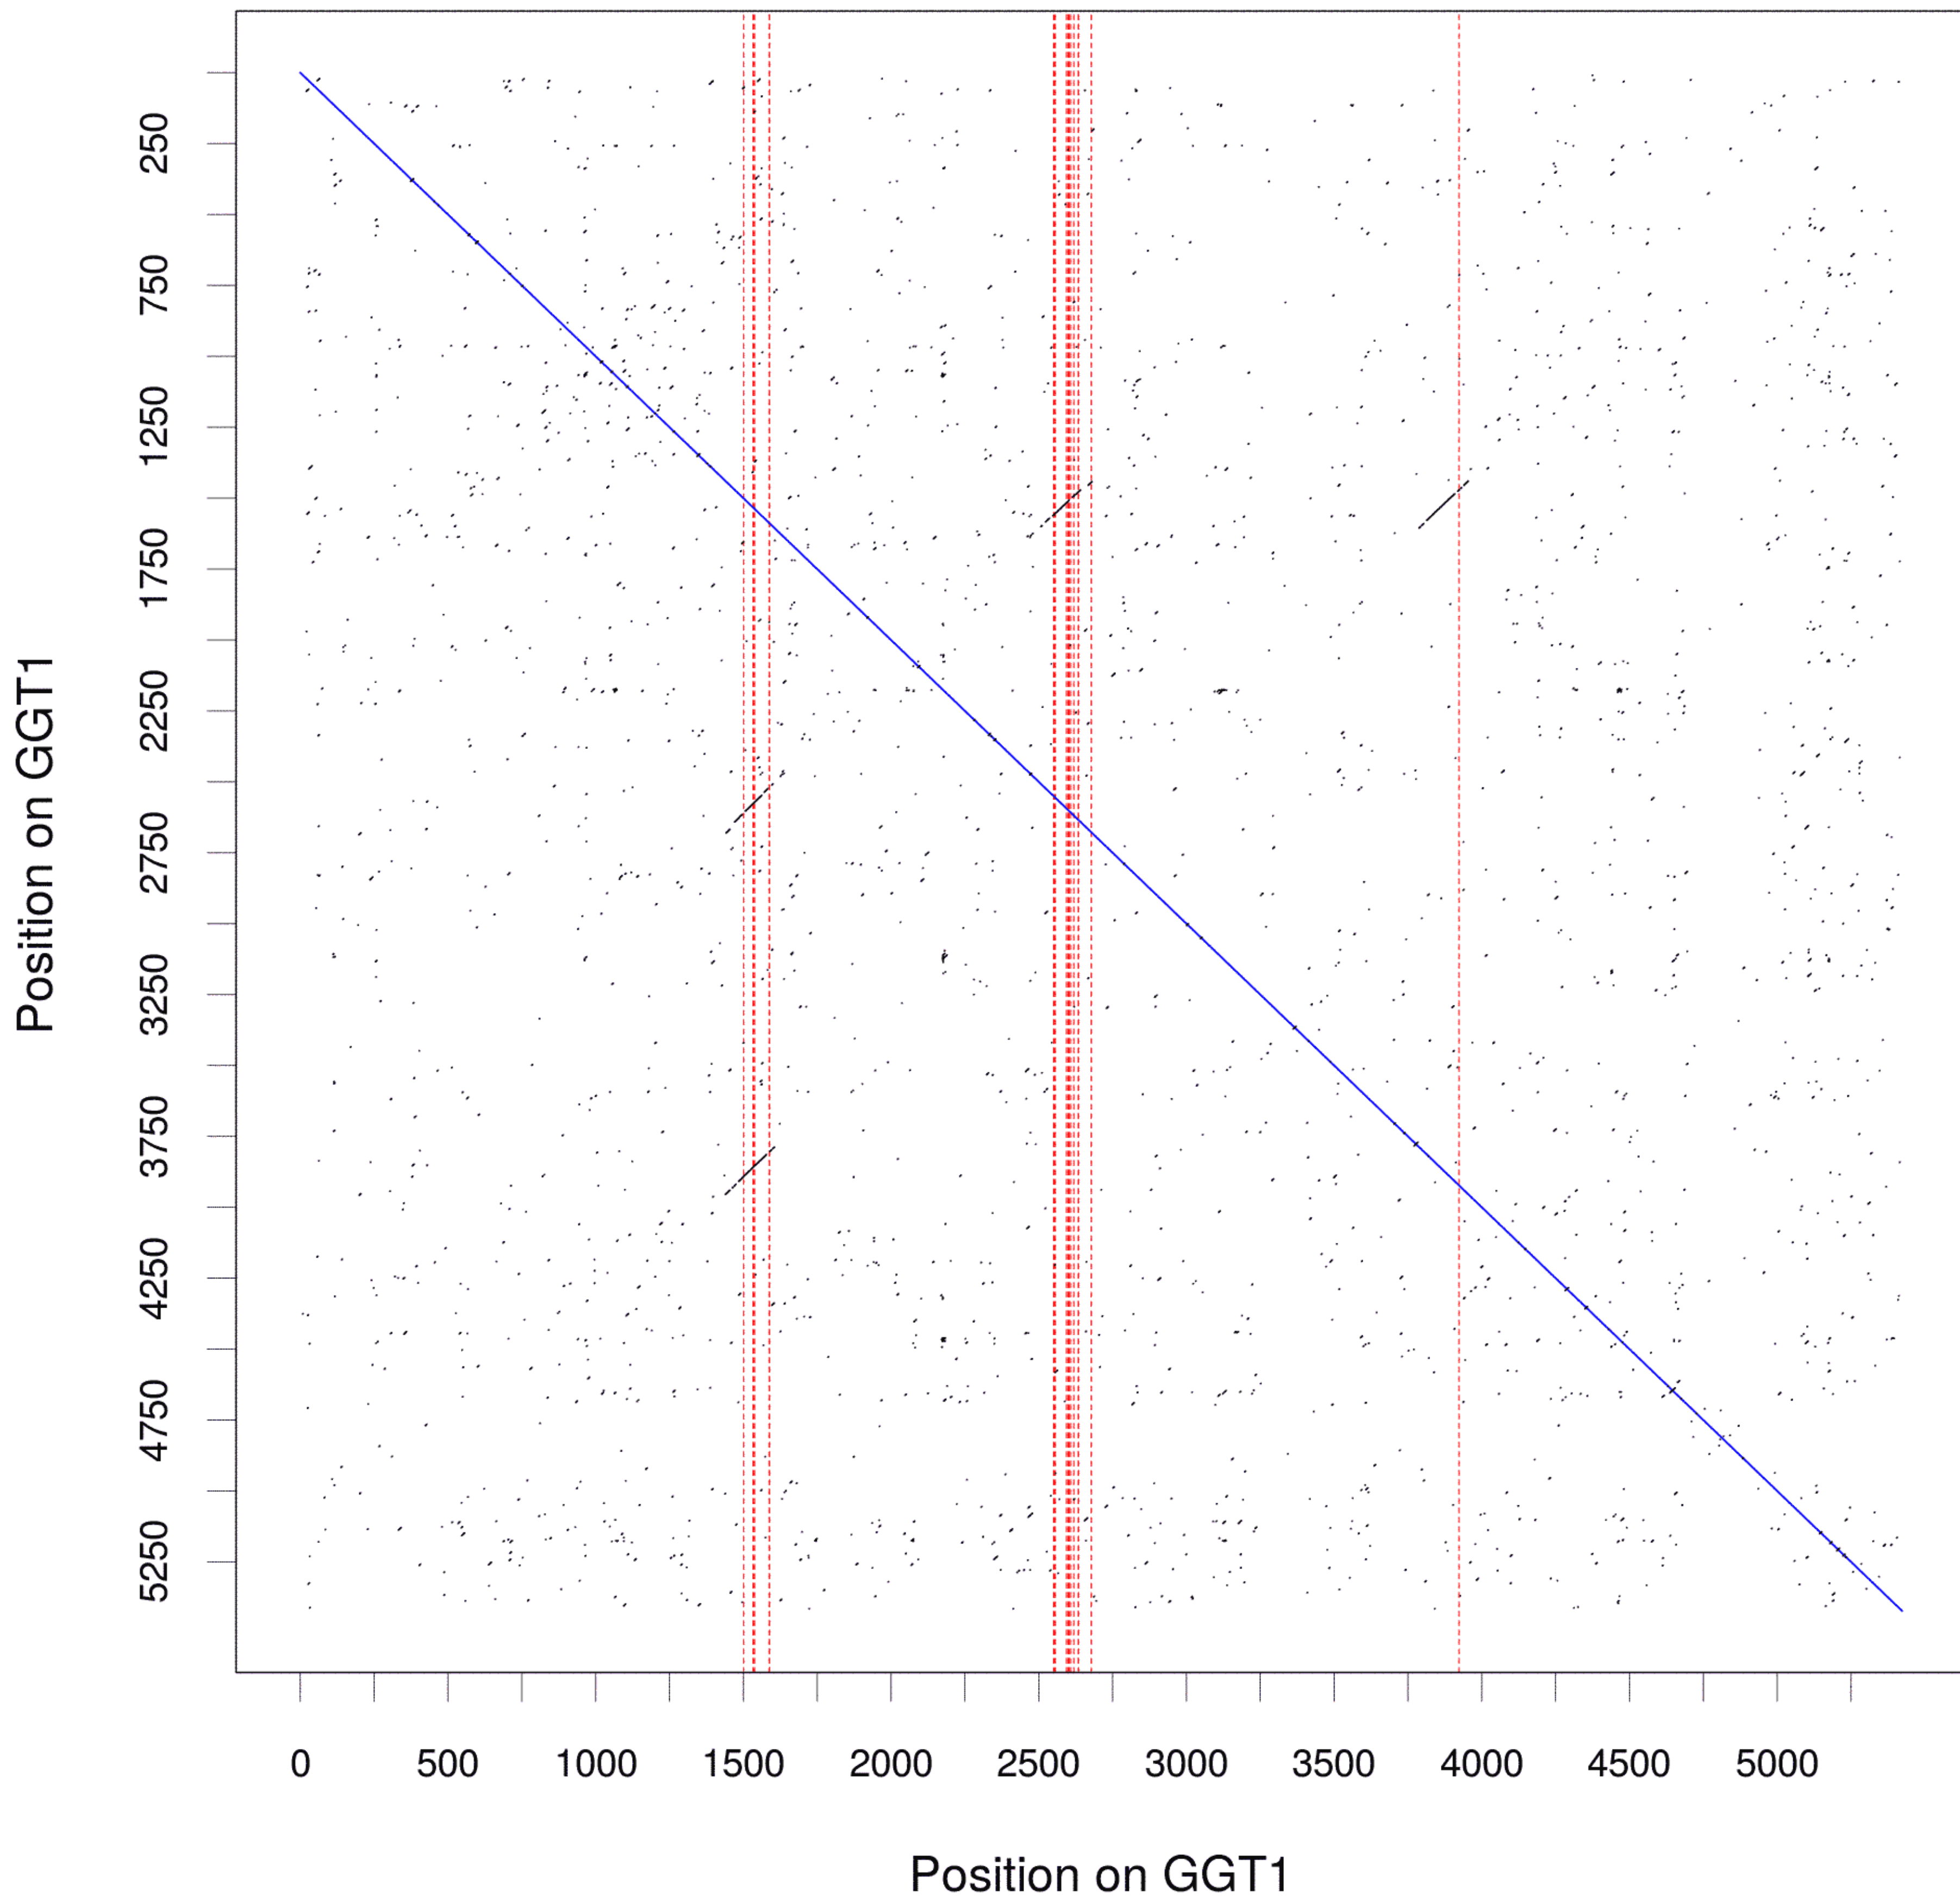

# GIPC1

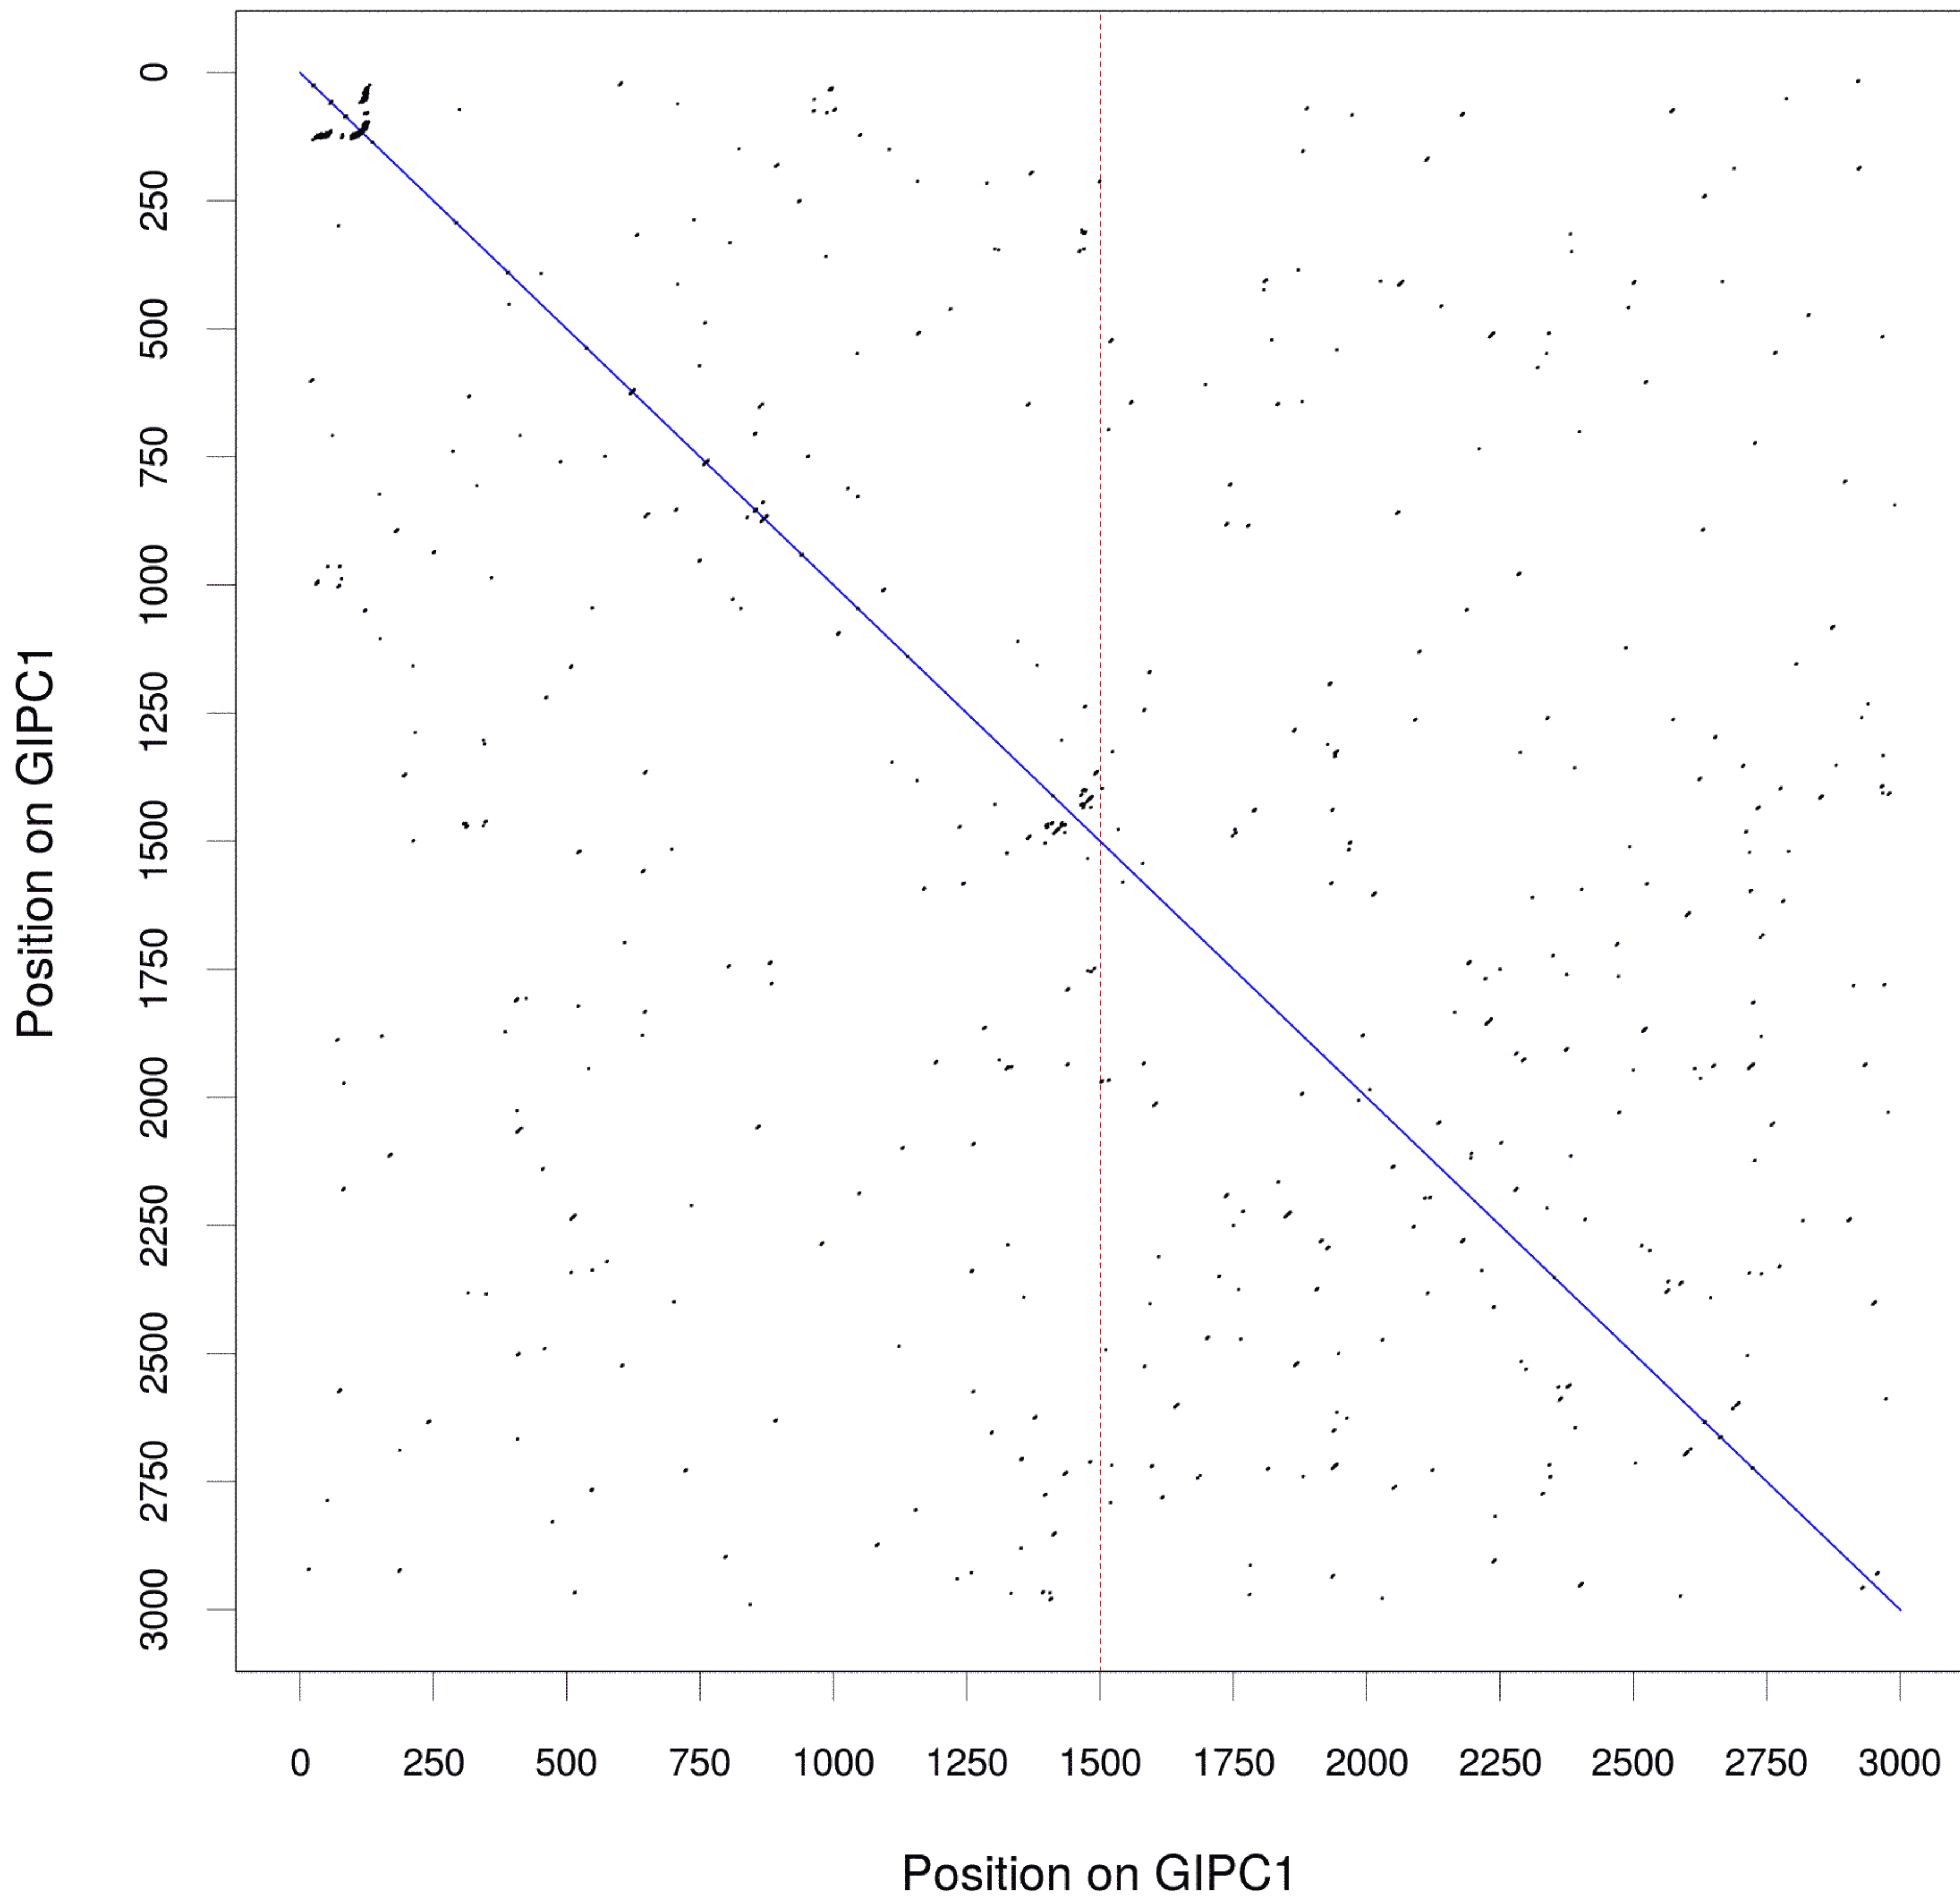



# GNG5

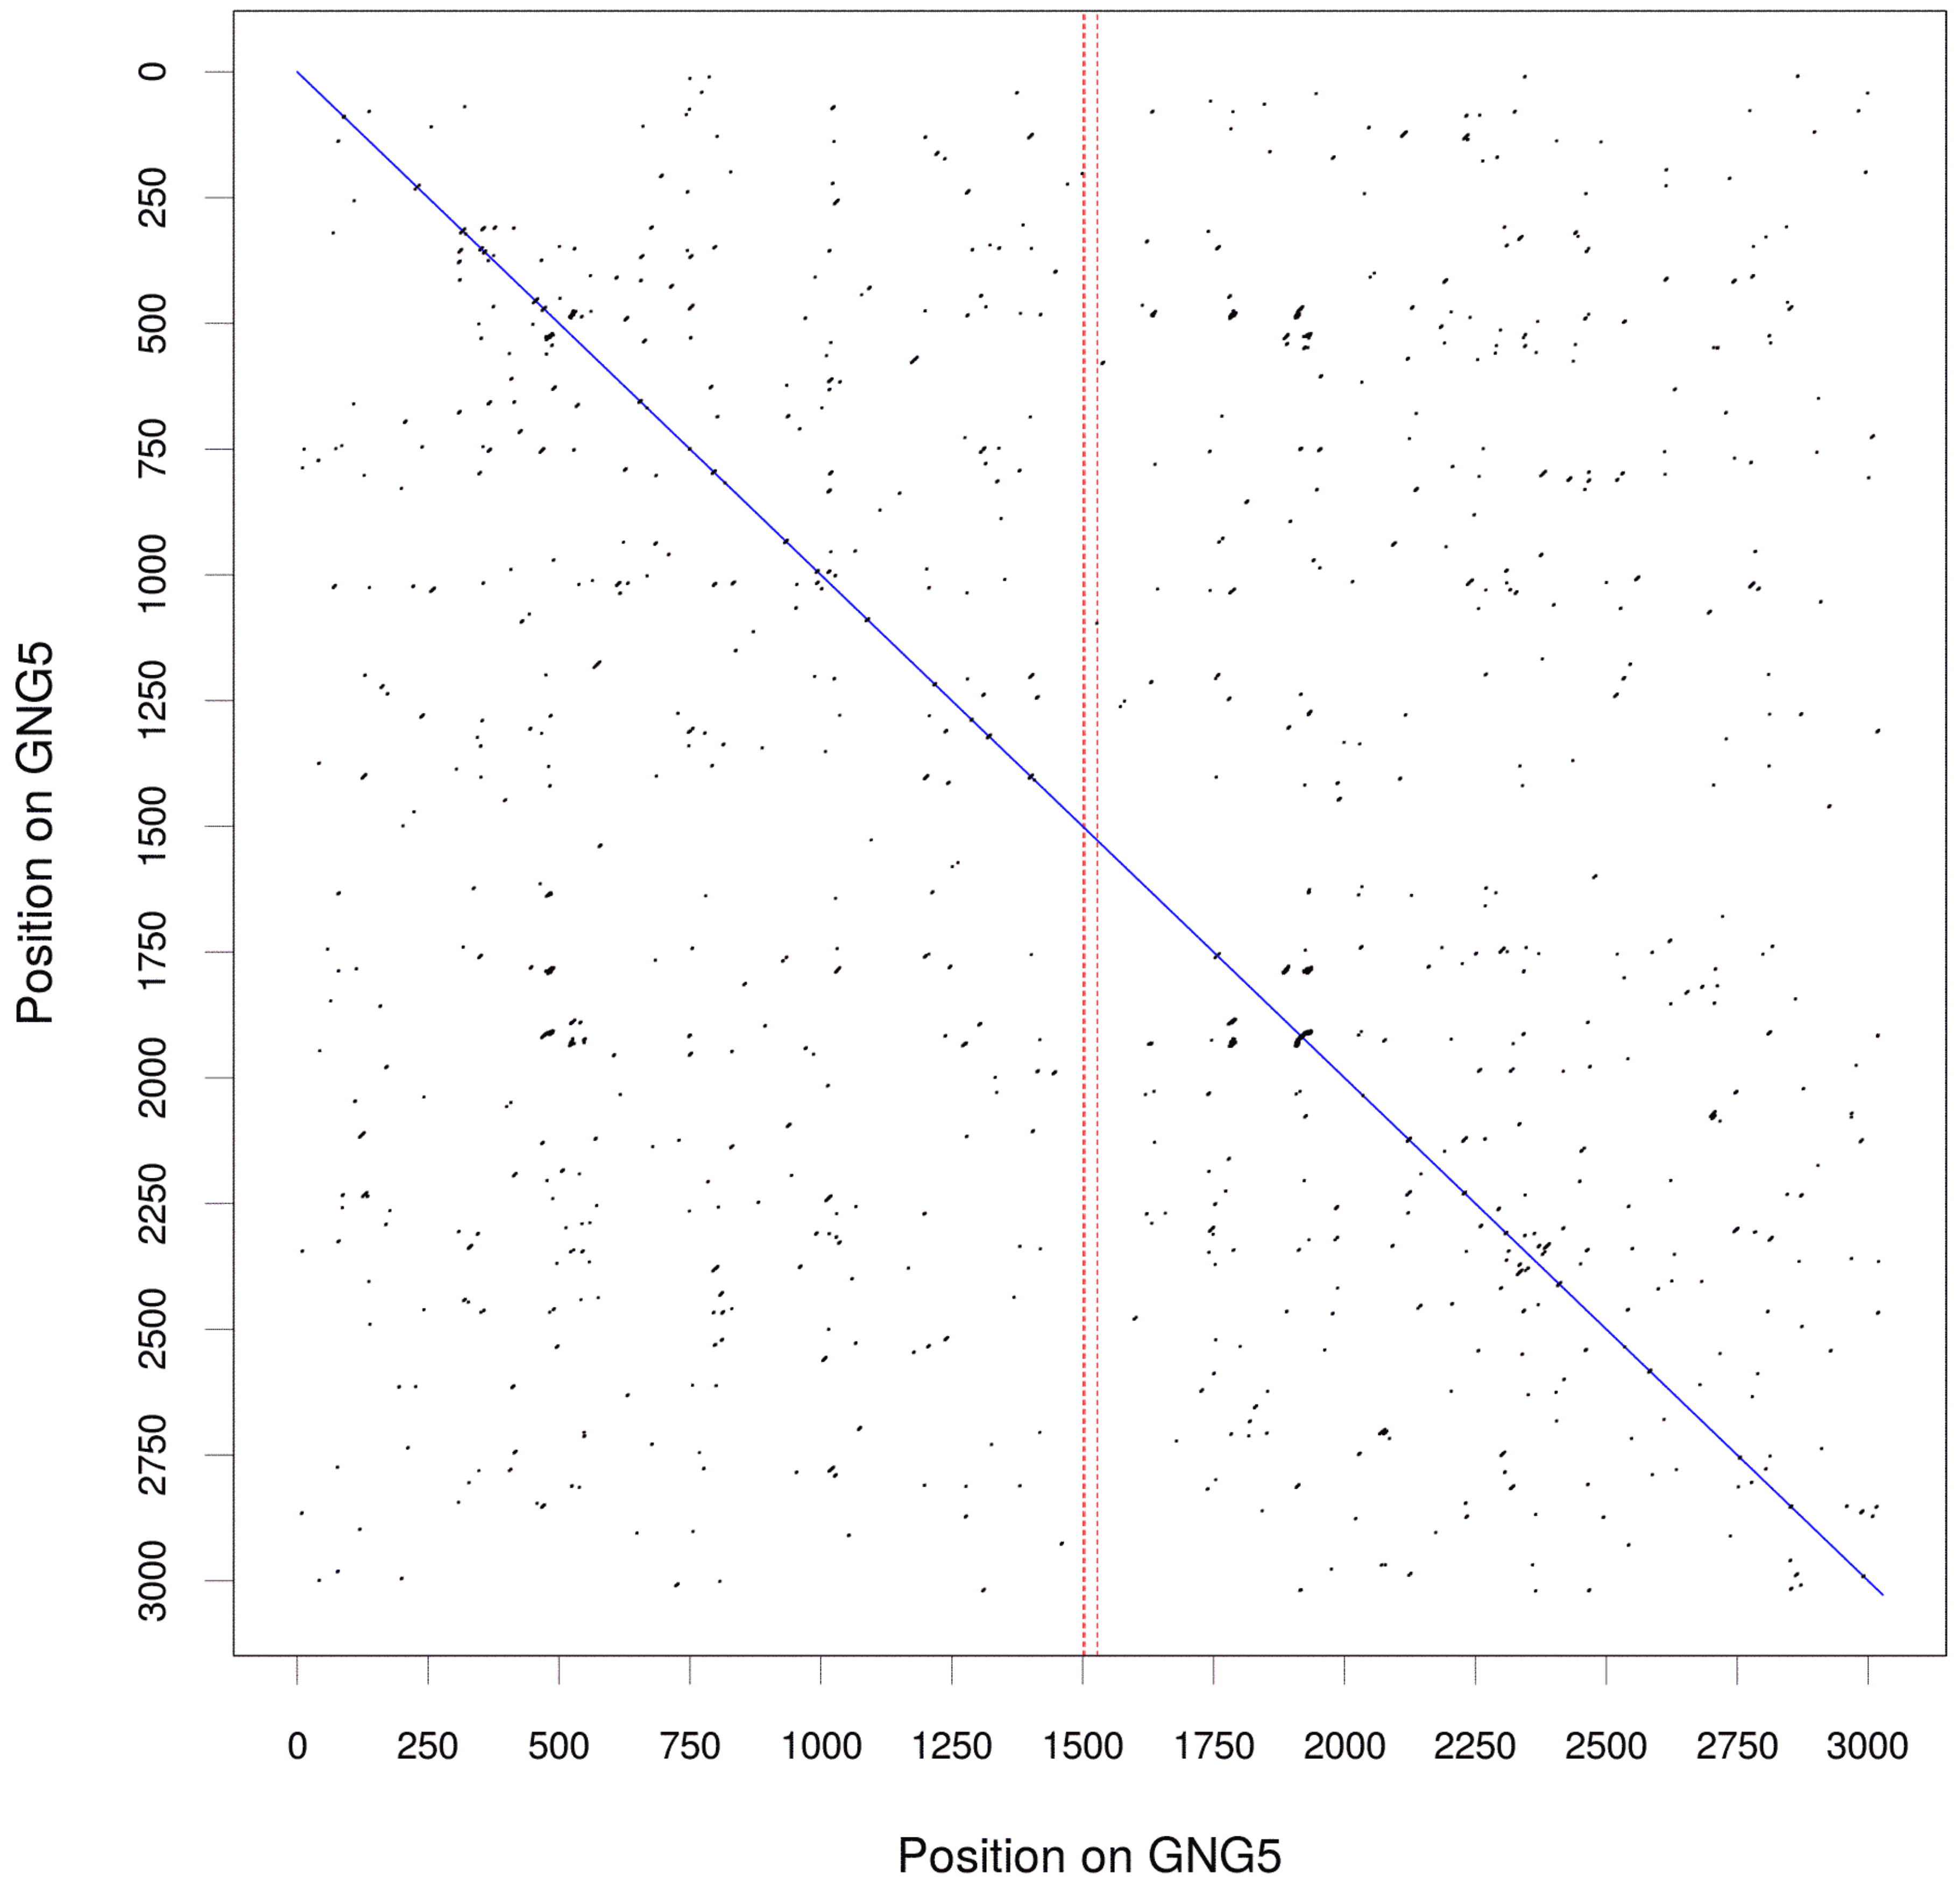

# GPAM

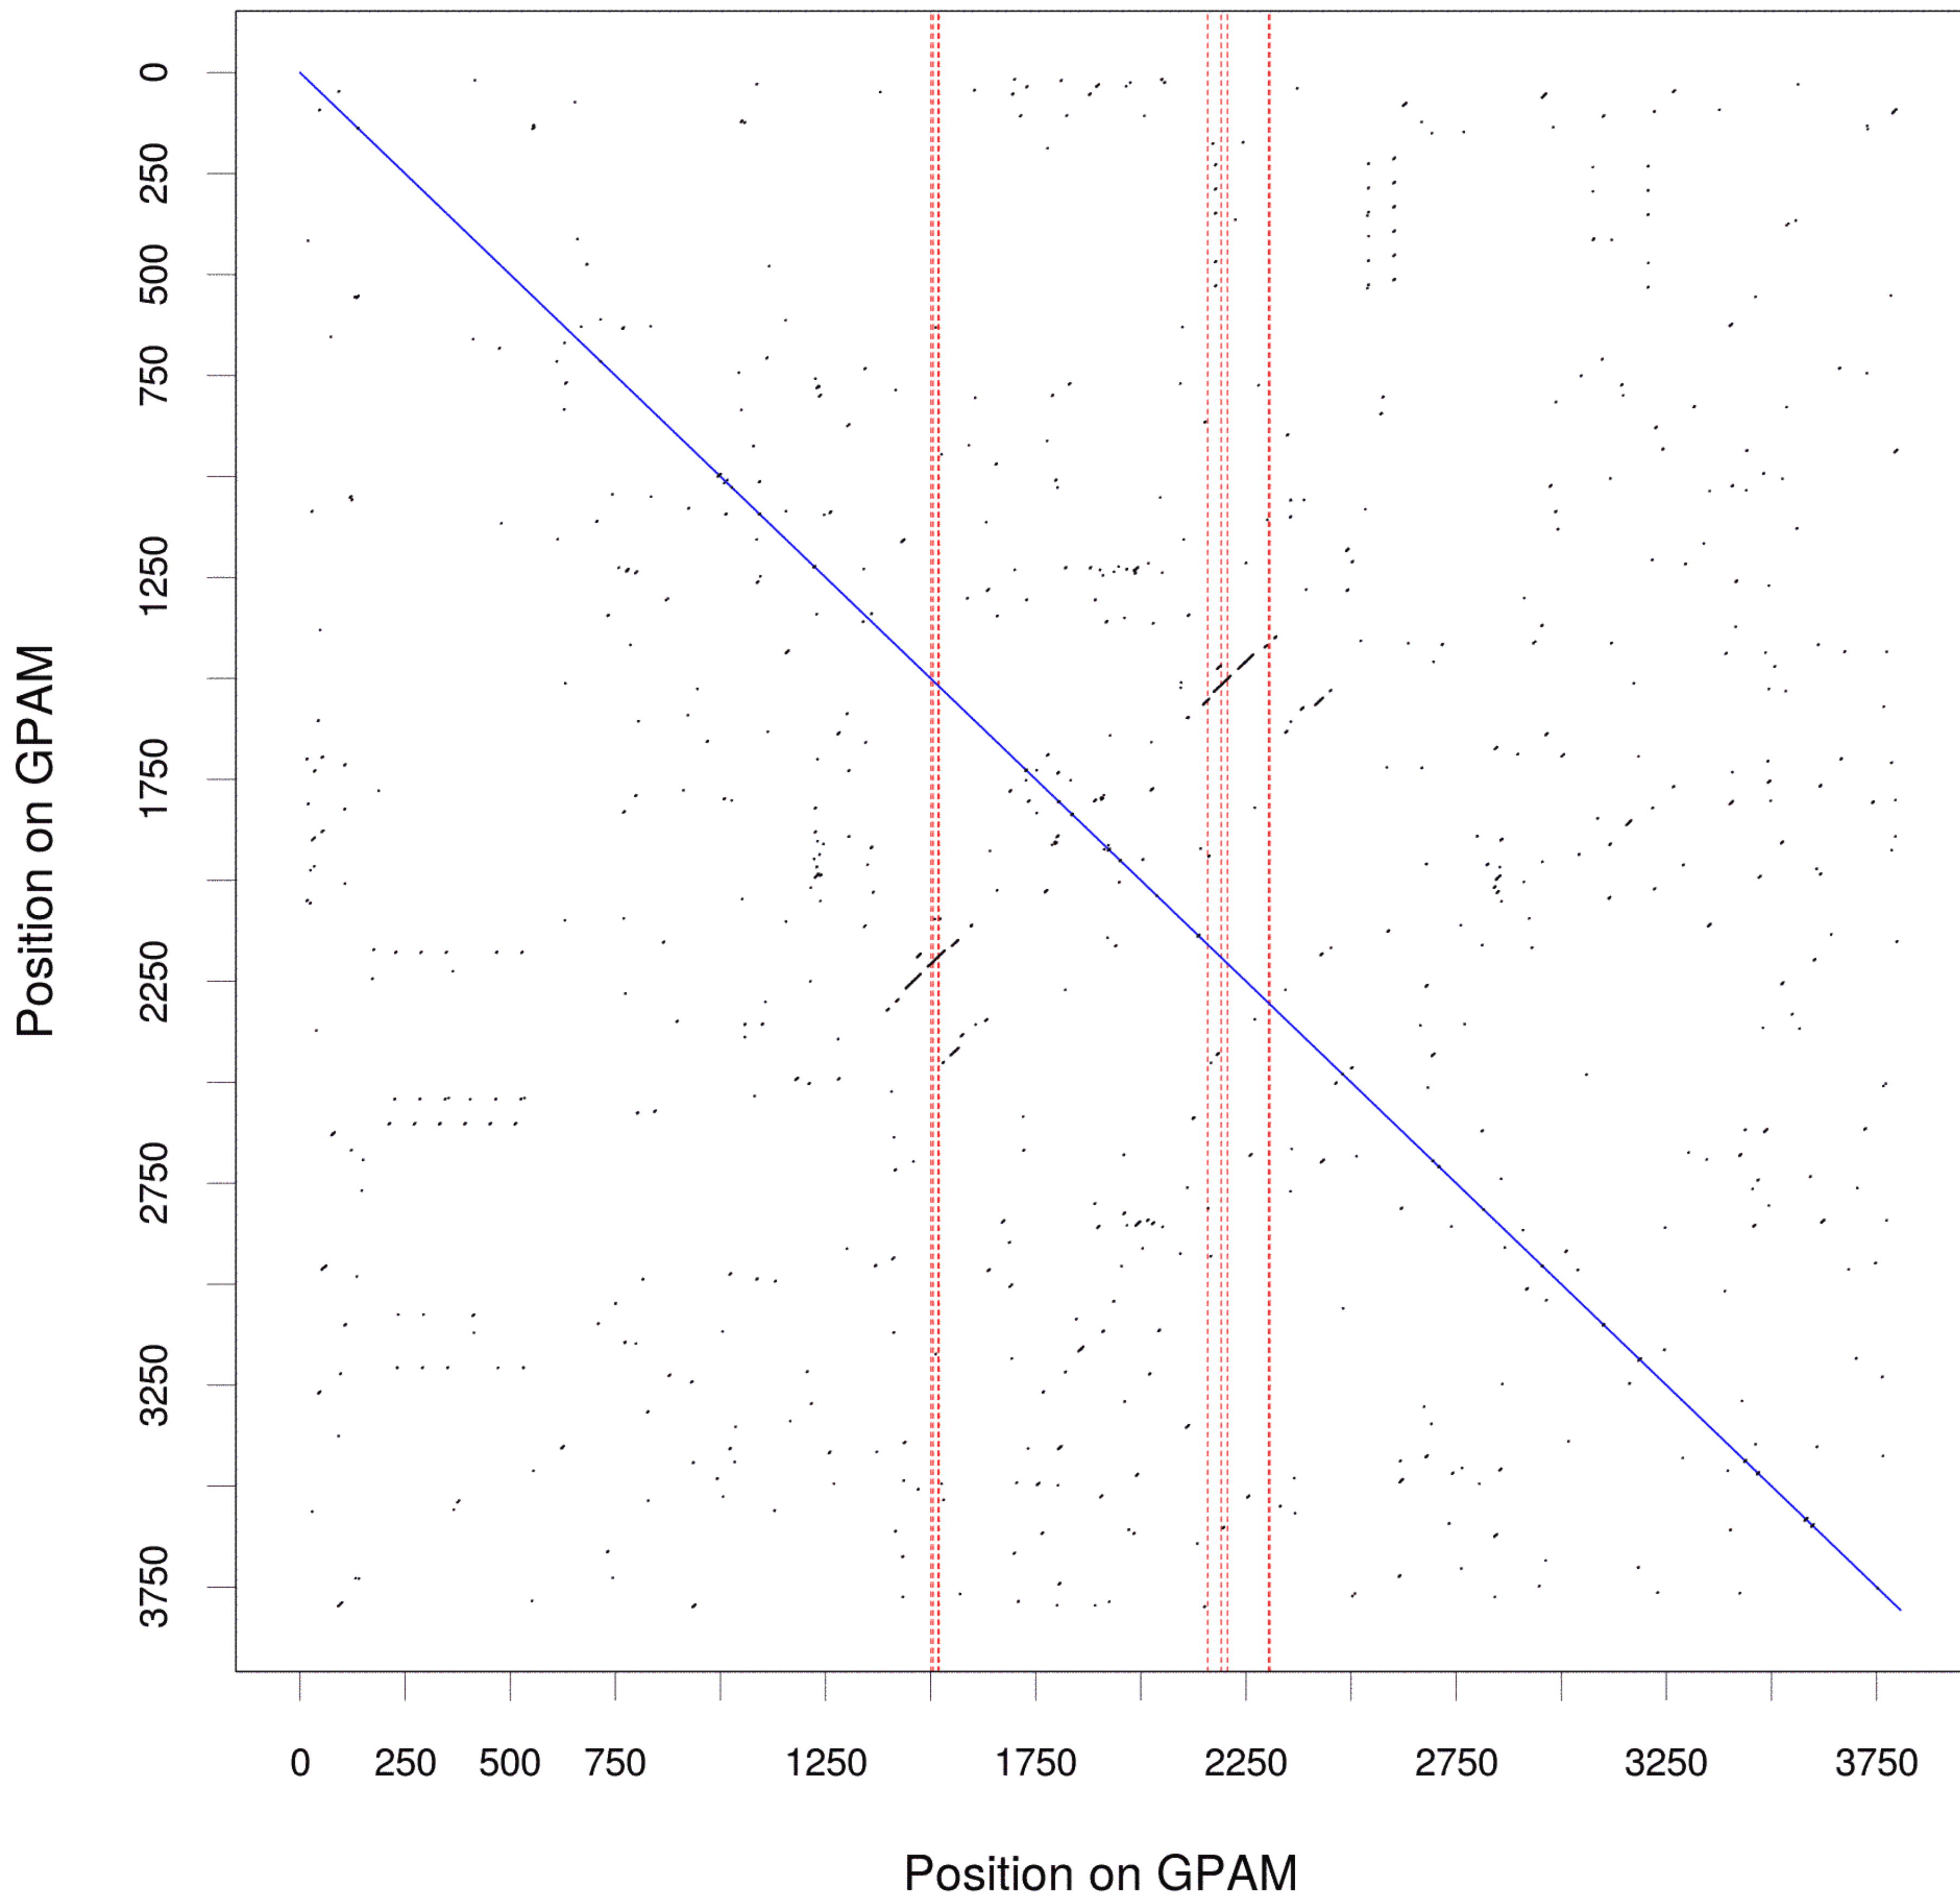

# GPBP1L1

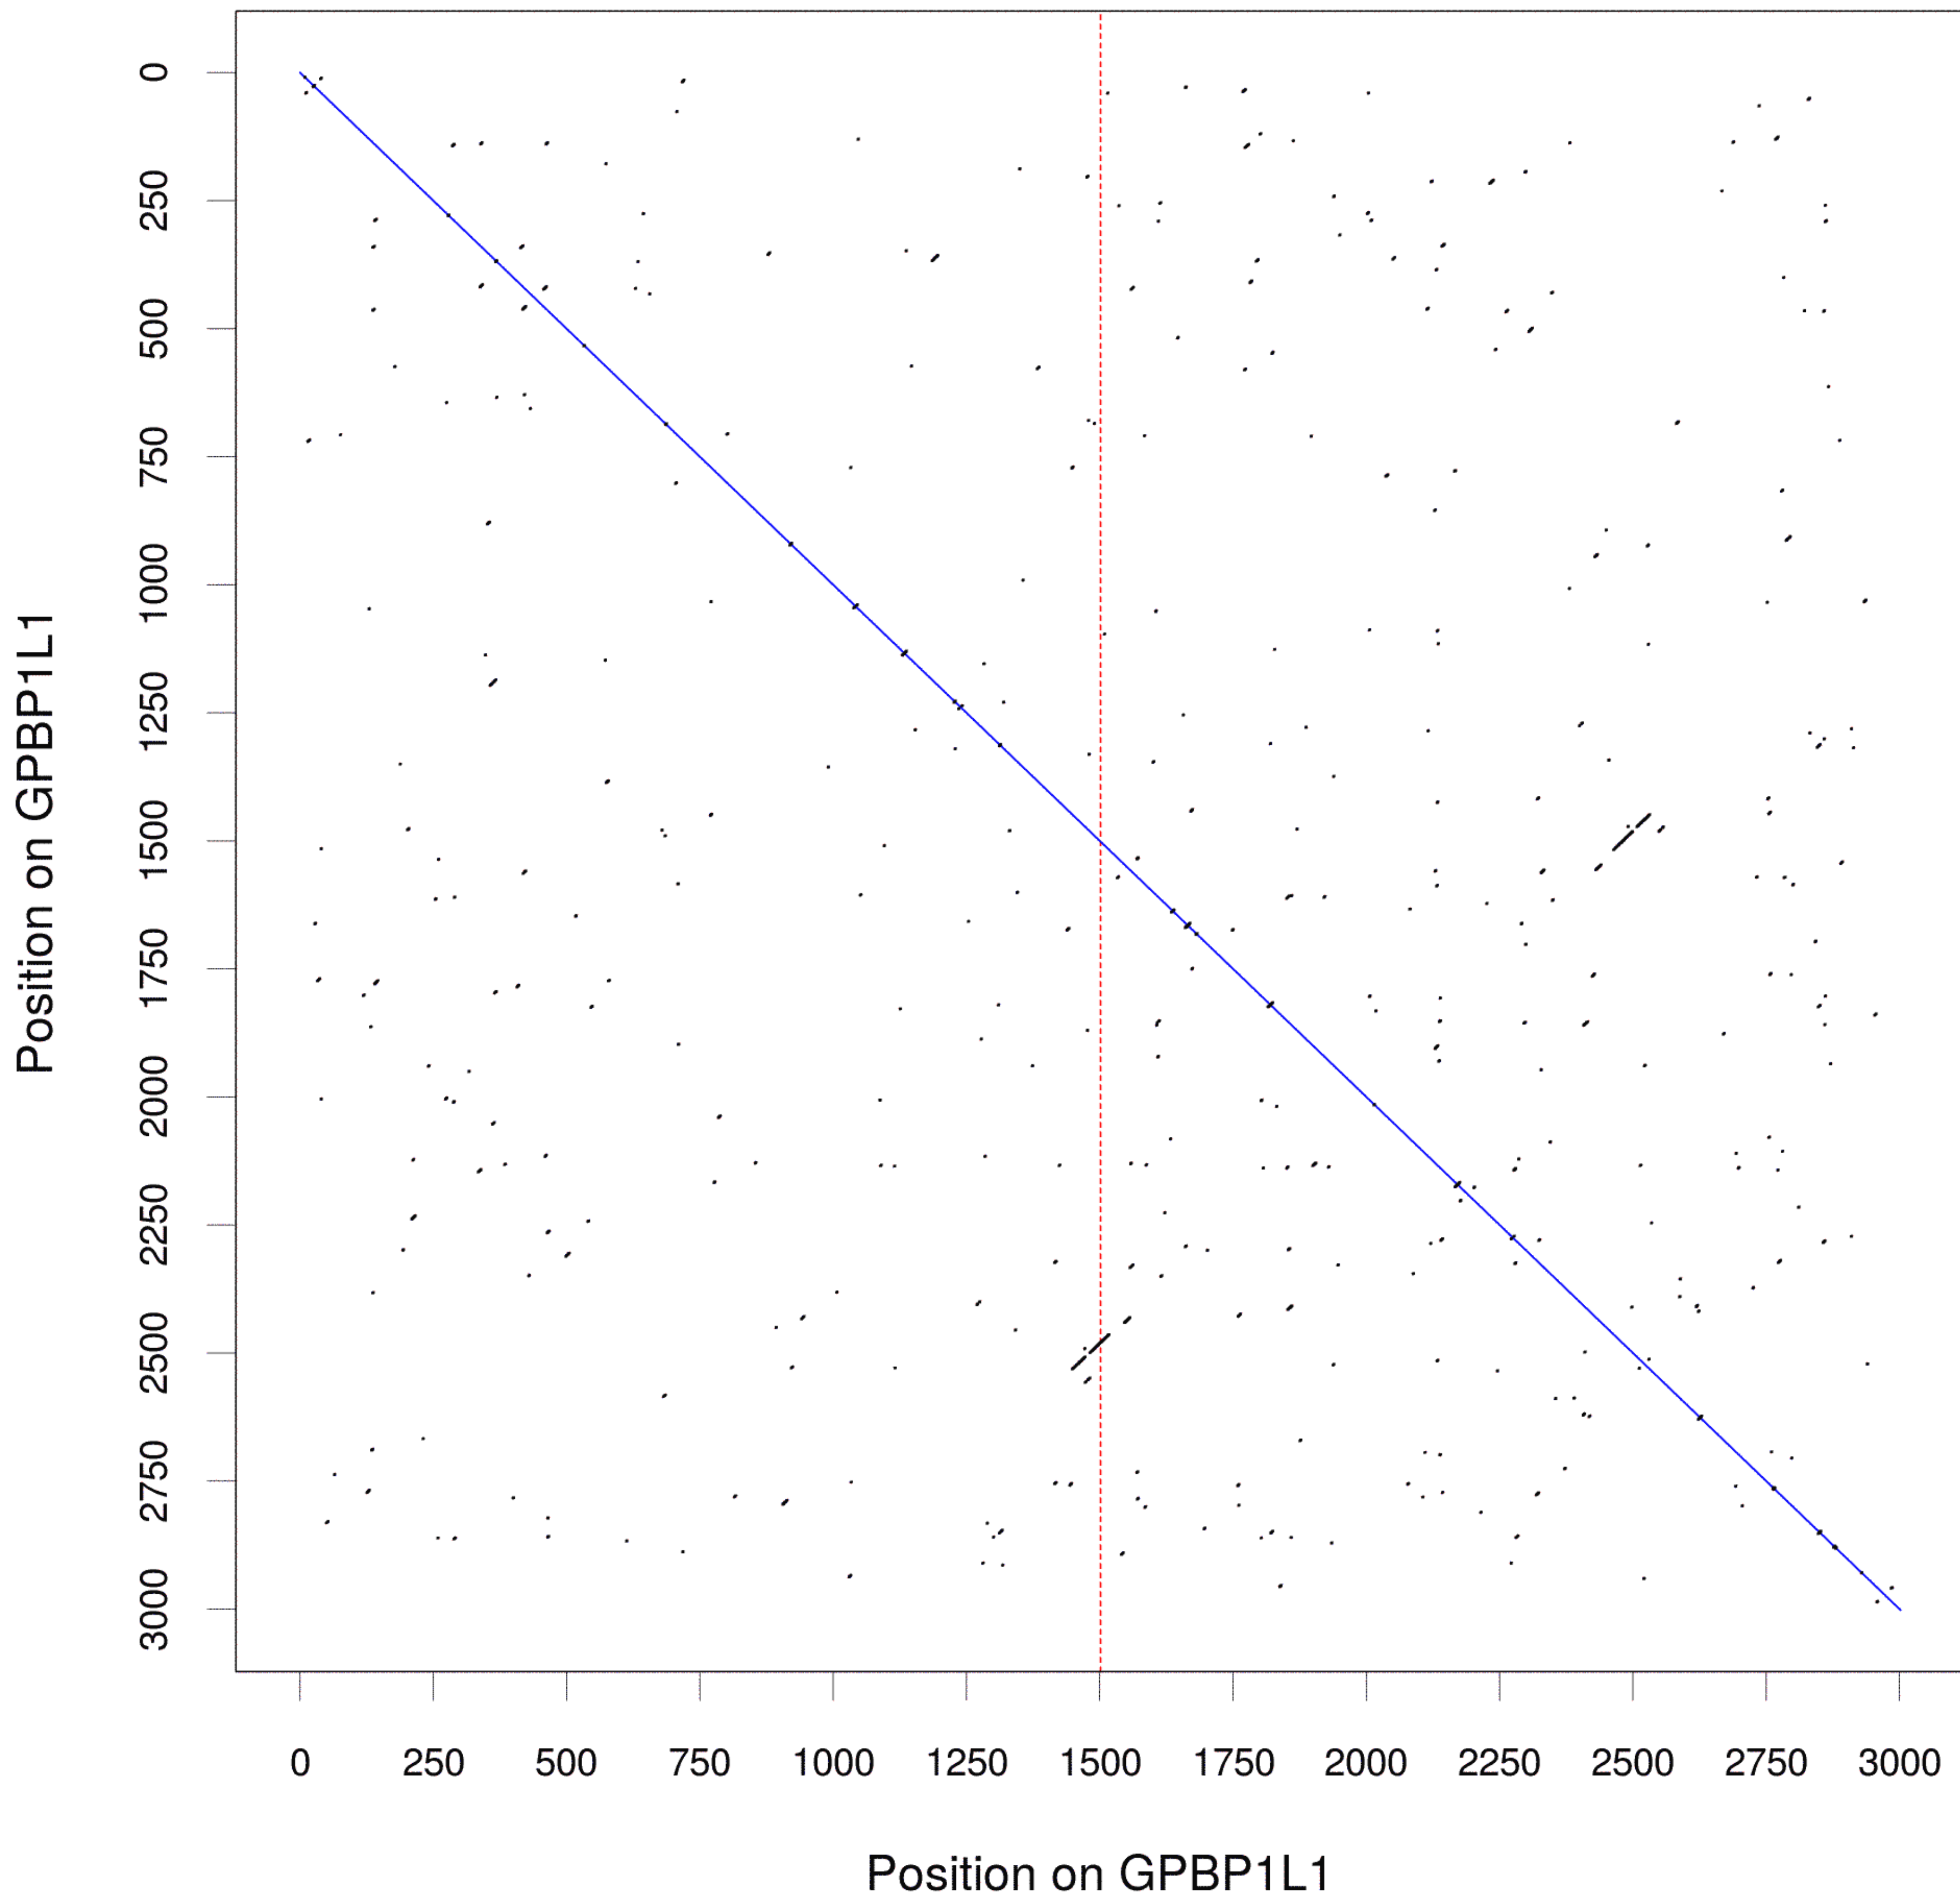

# GPRC5C

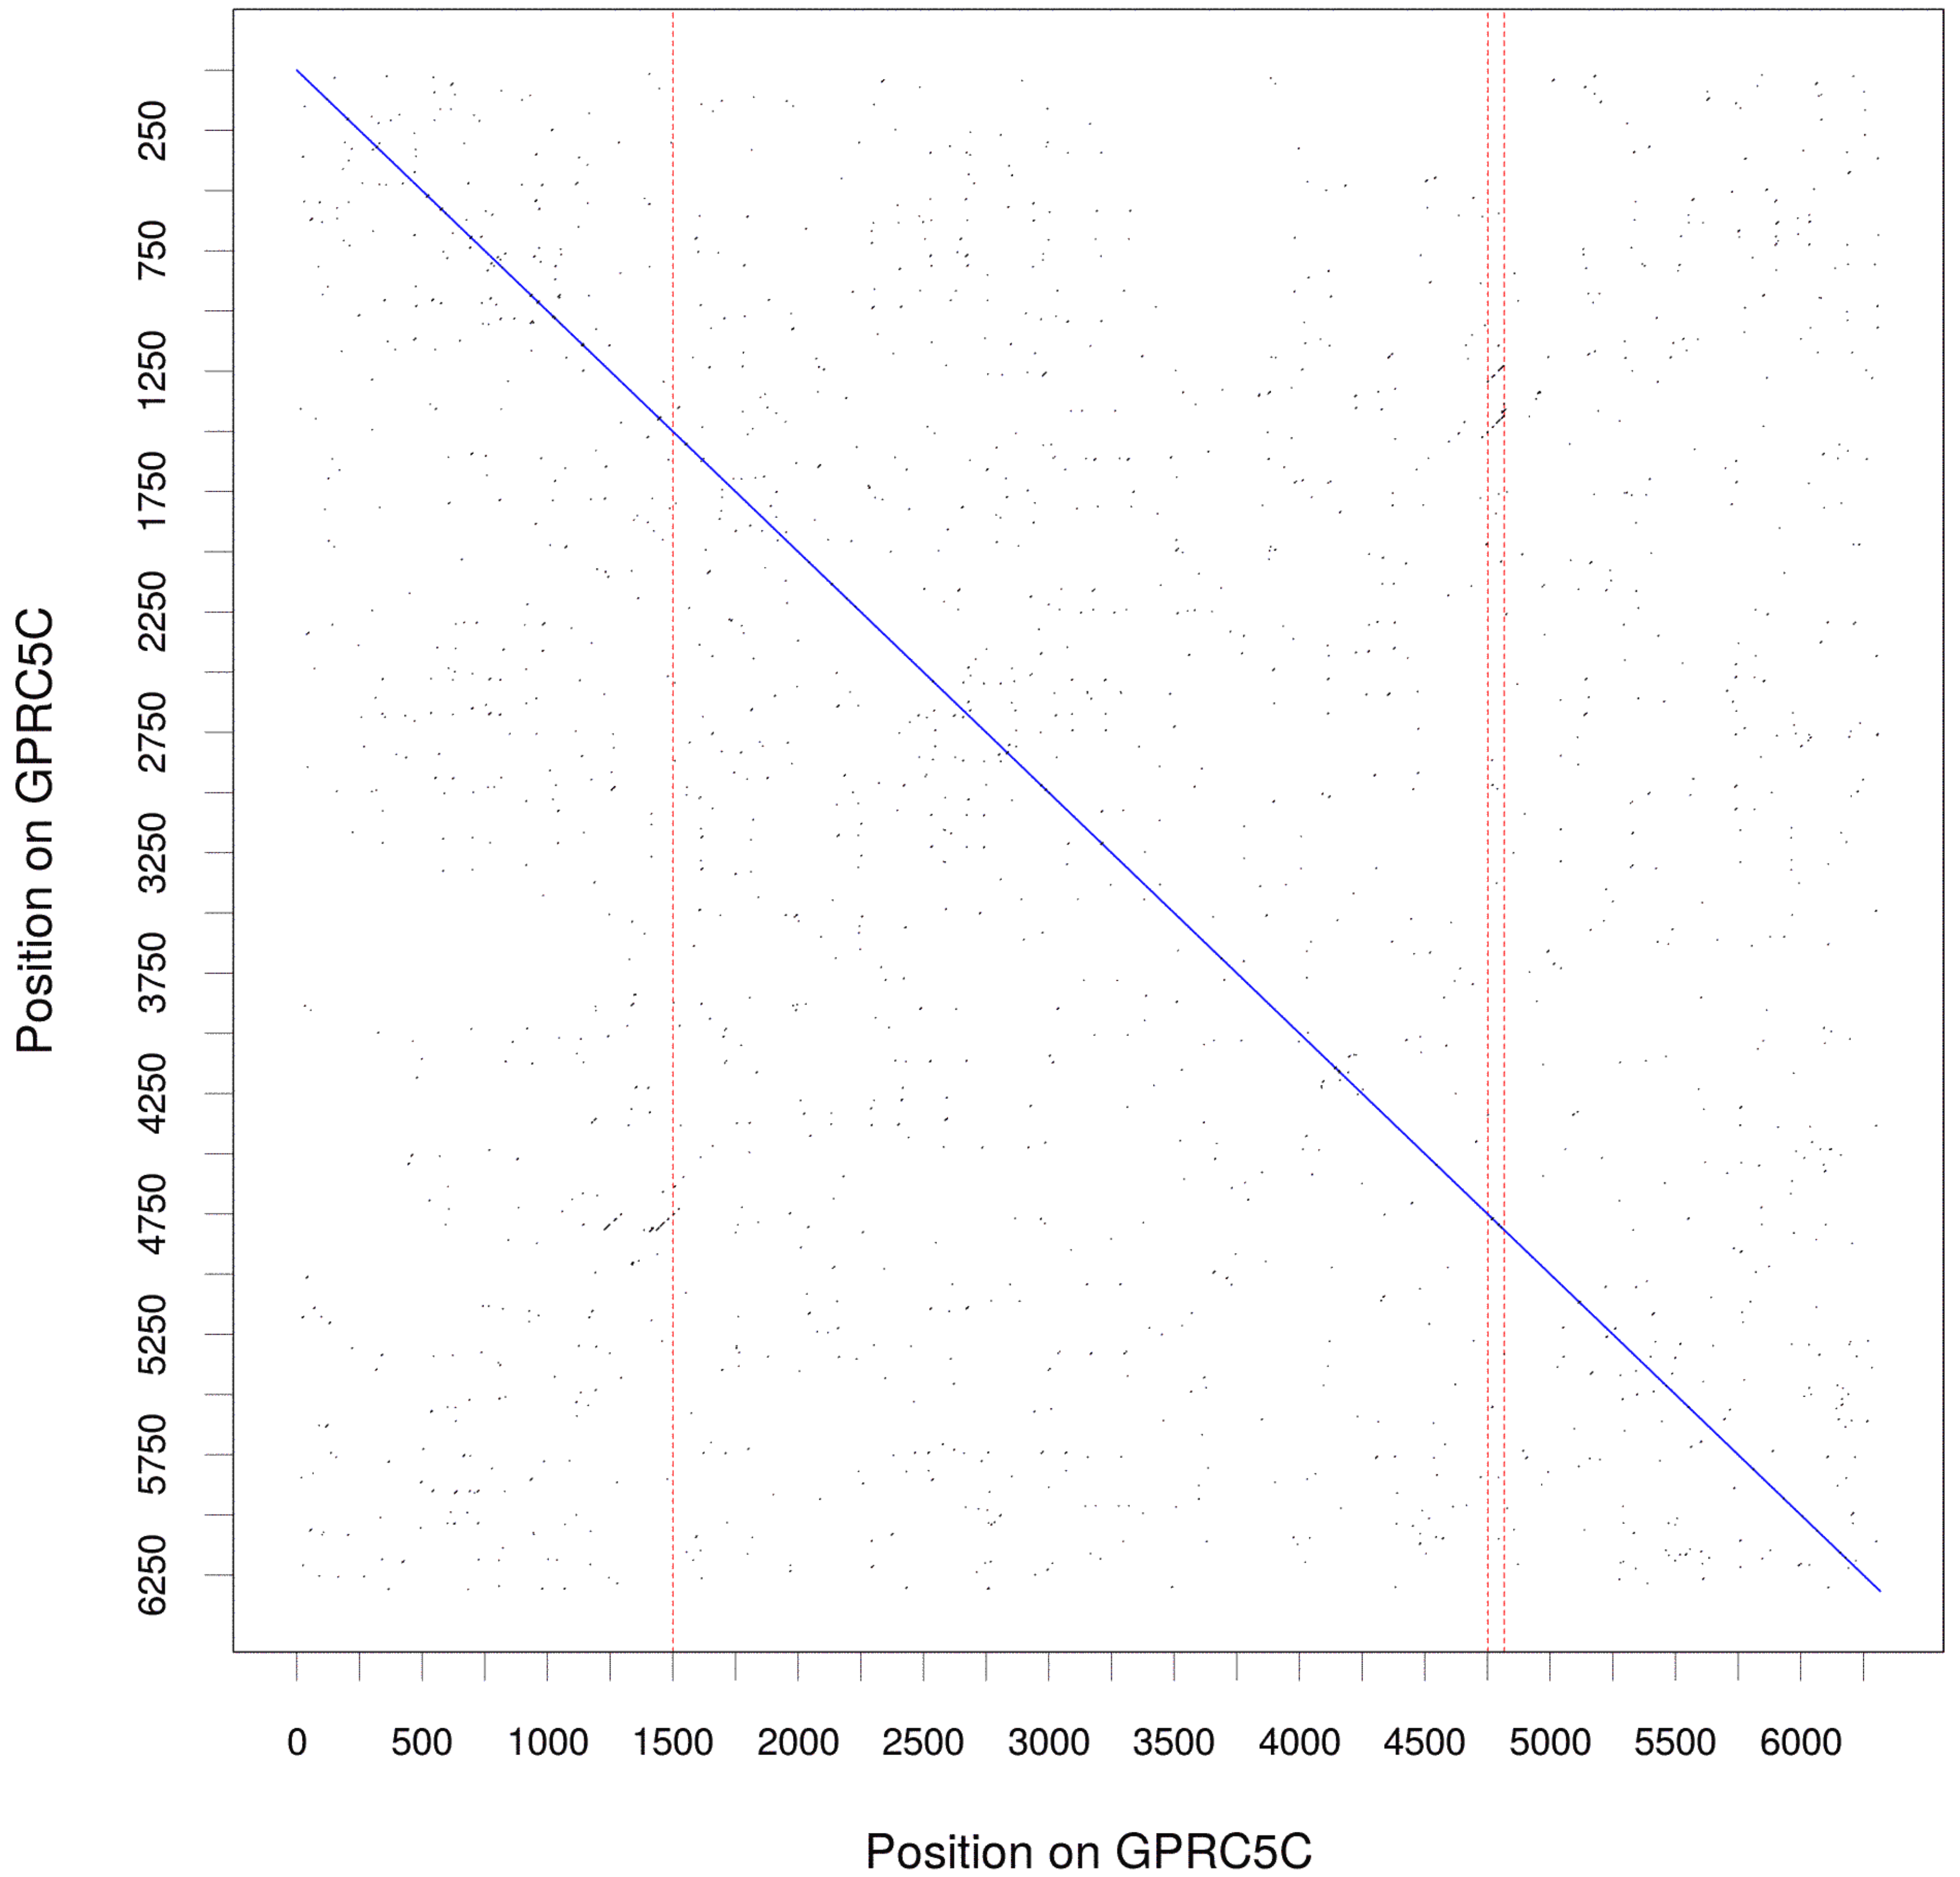

# GRTP1

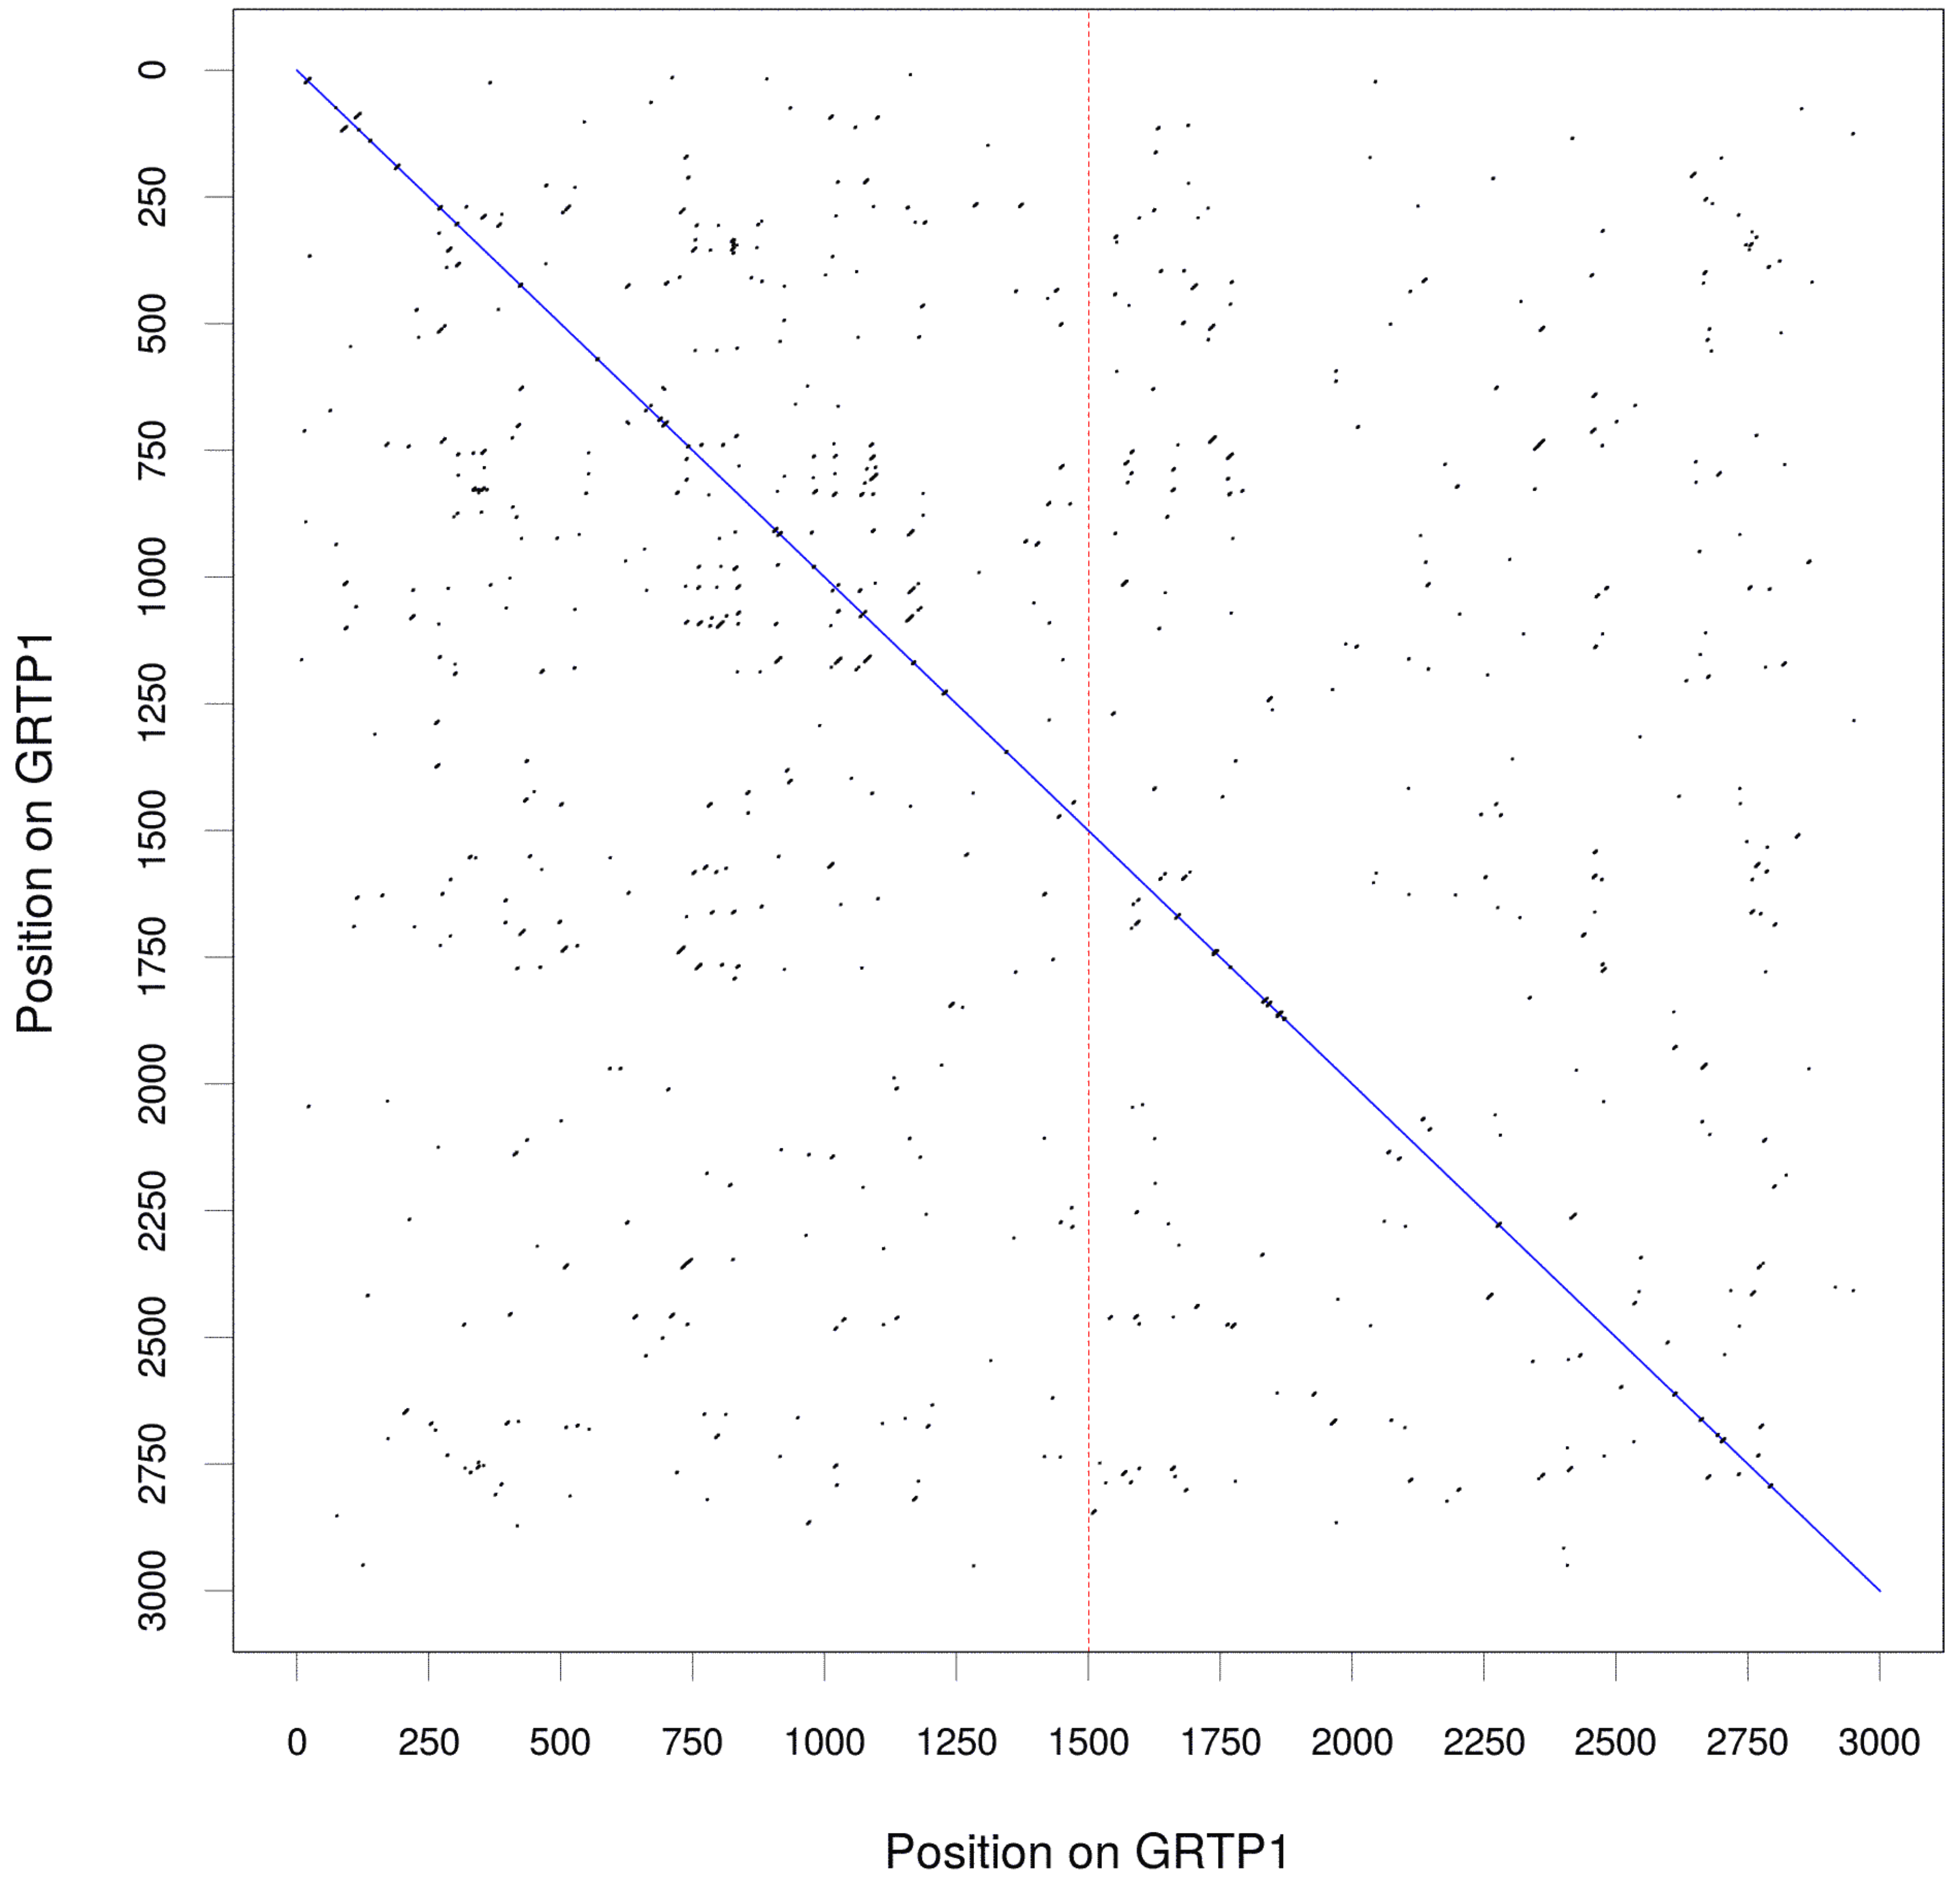

# GTF2H5

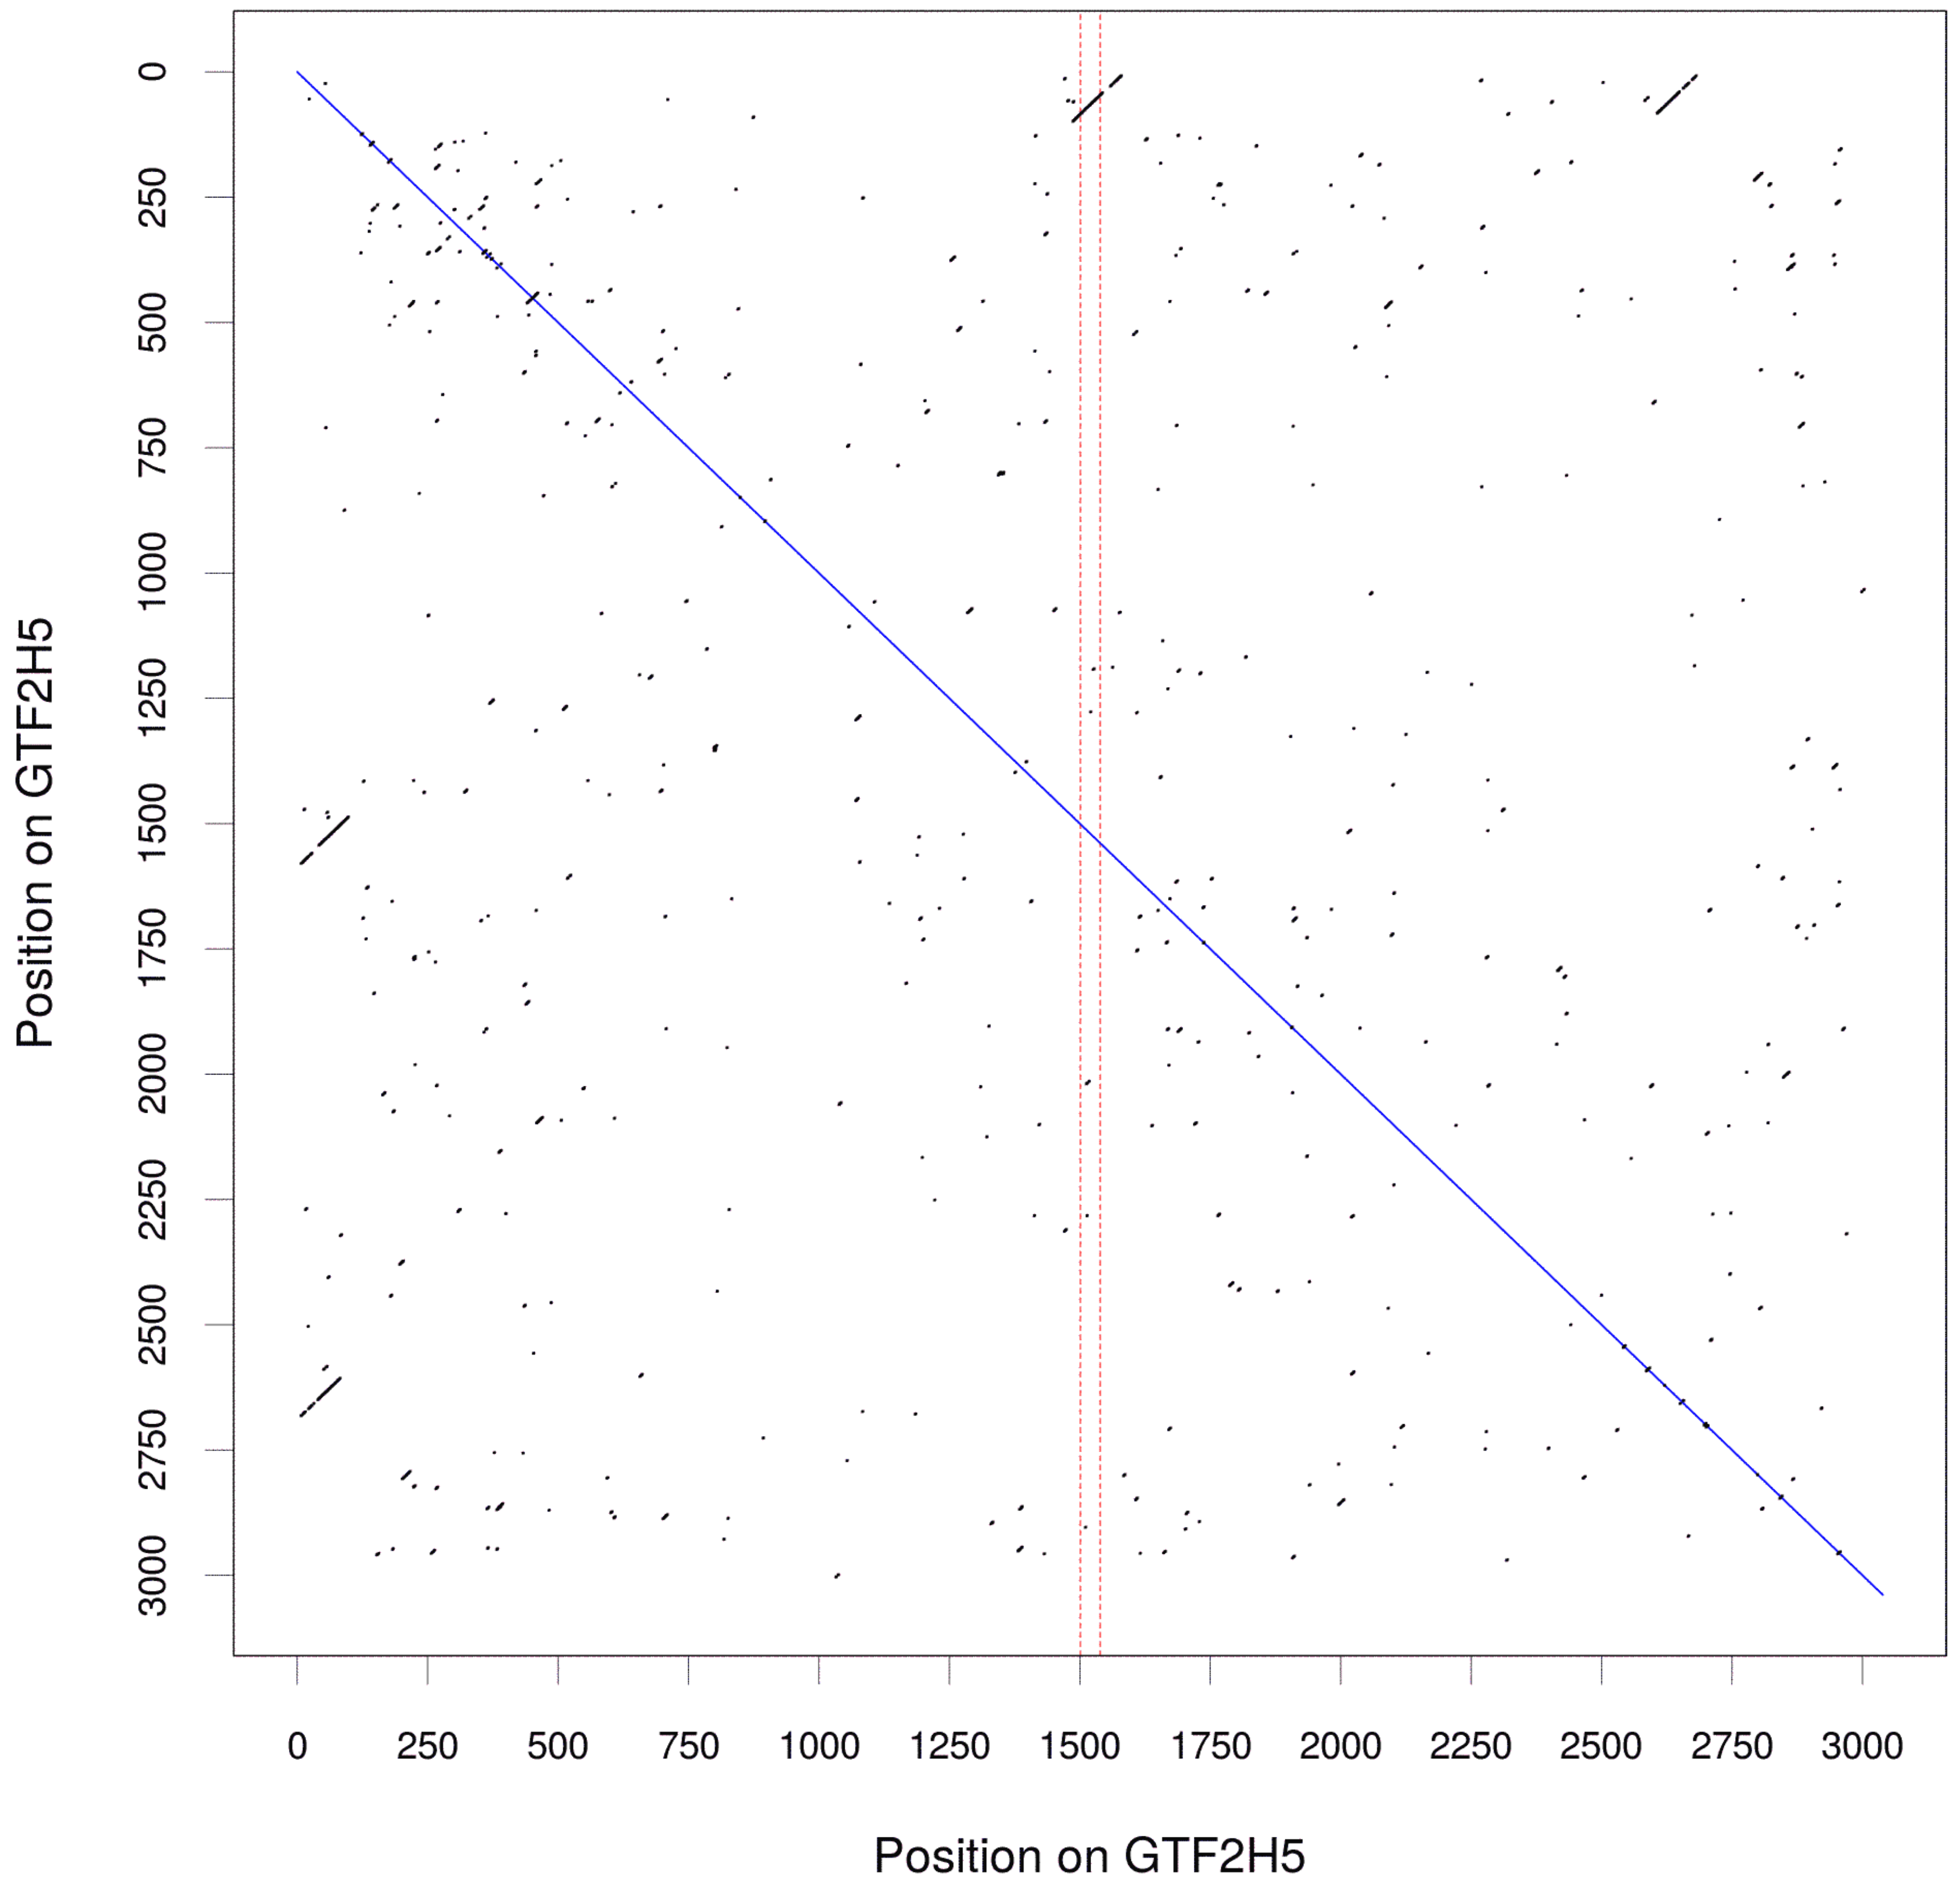

# HAPLN3

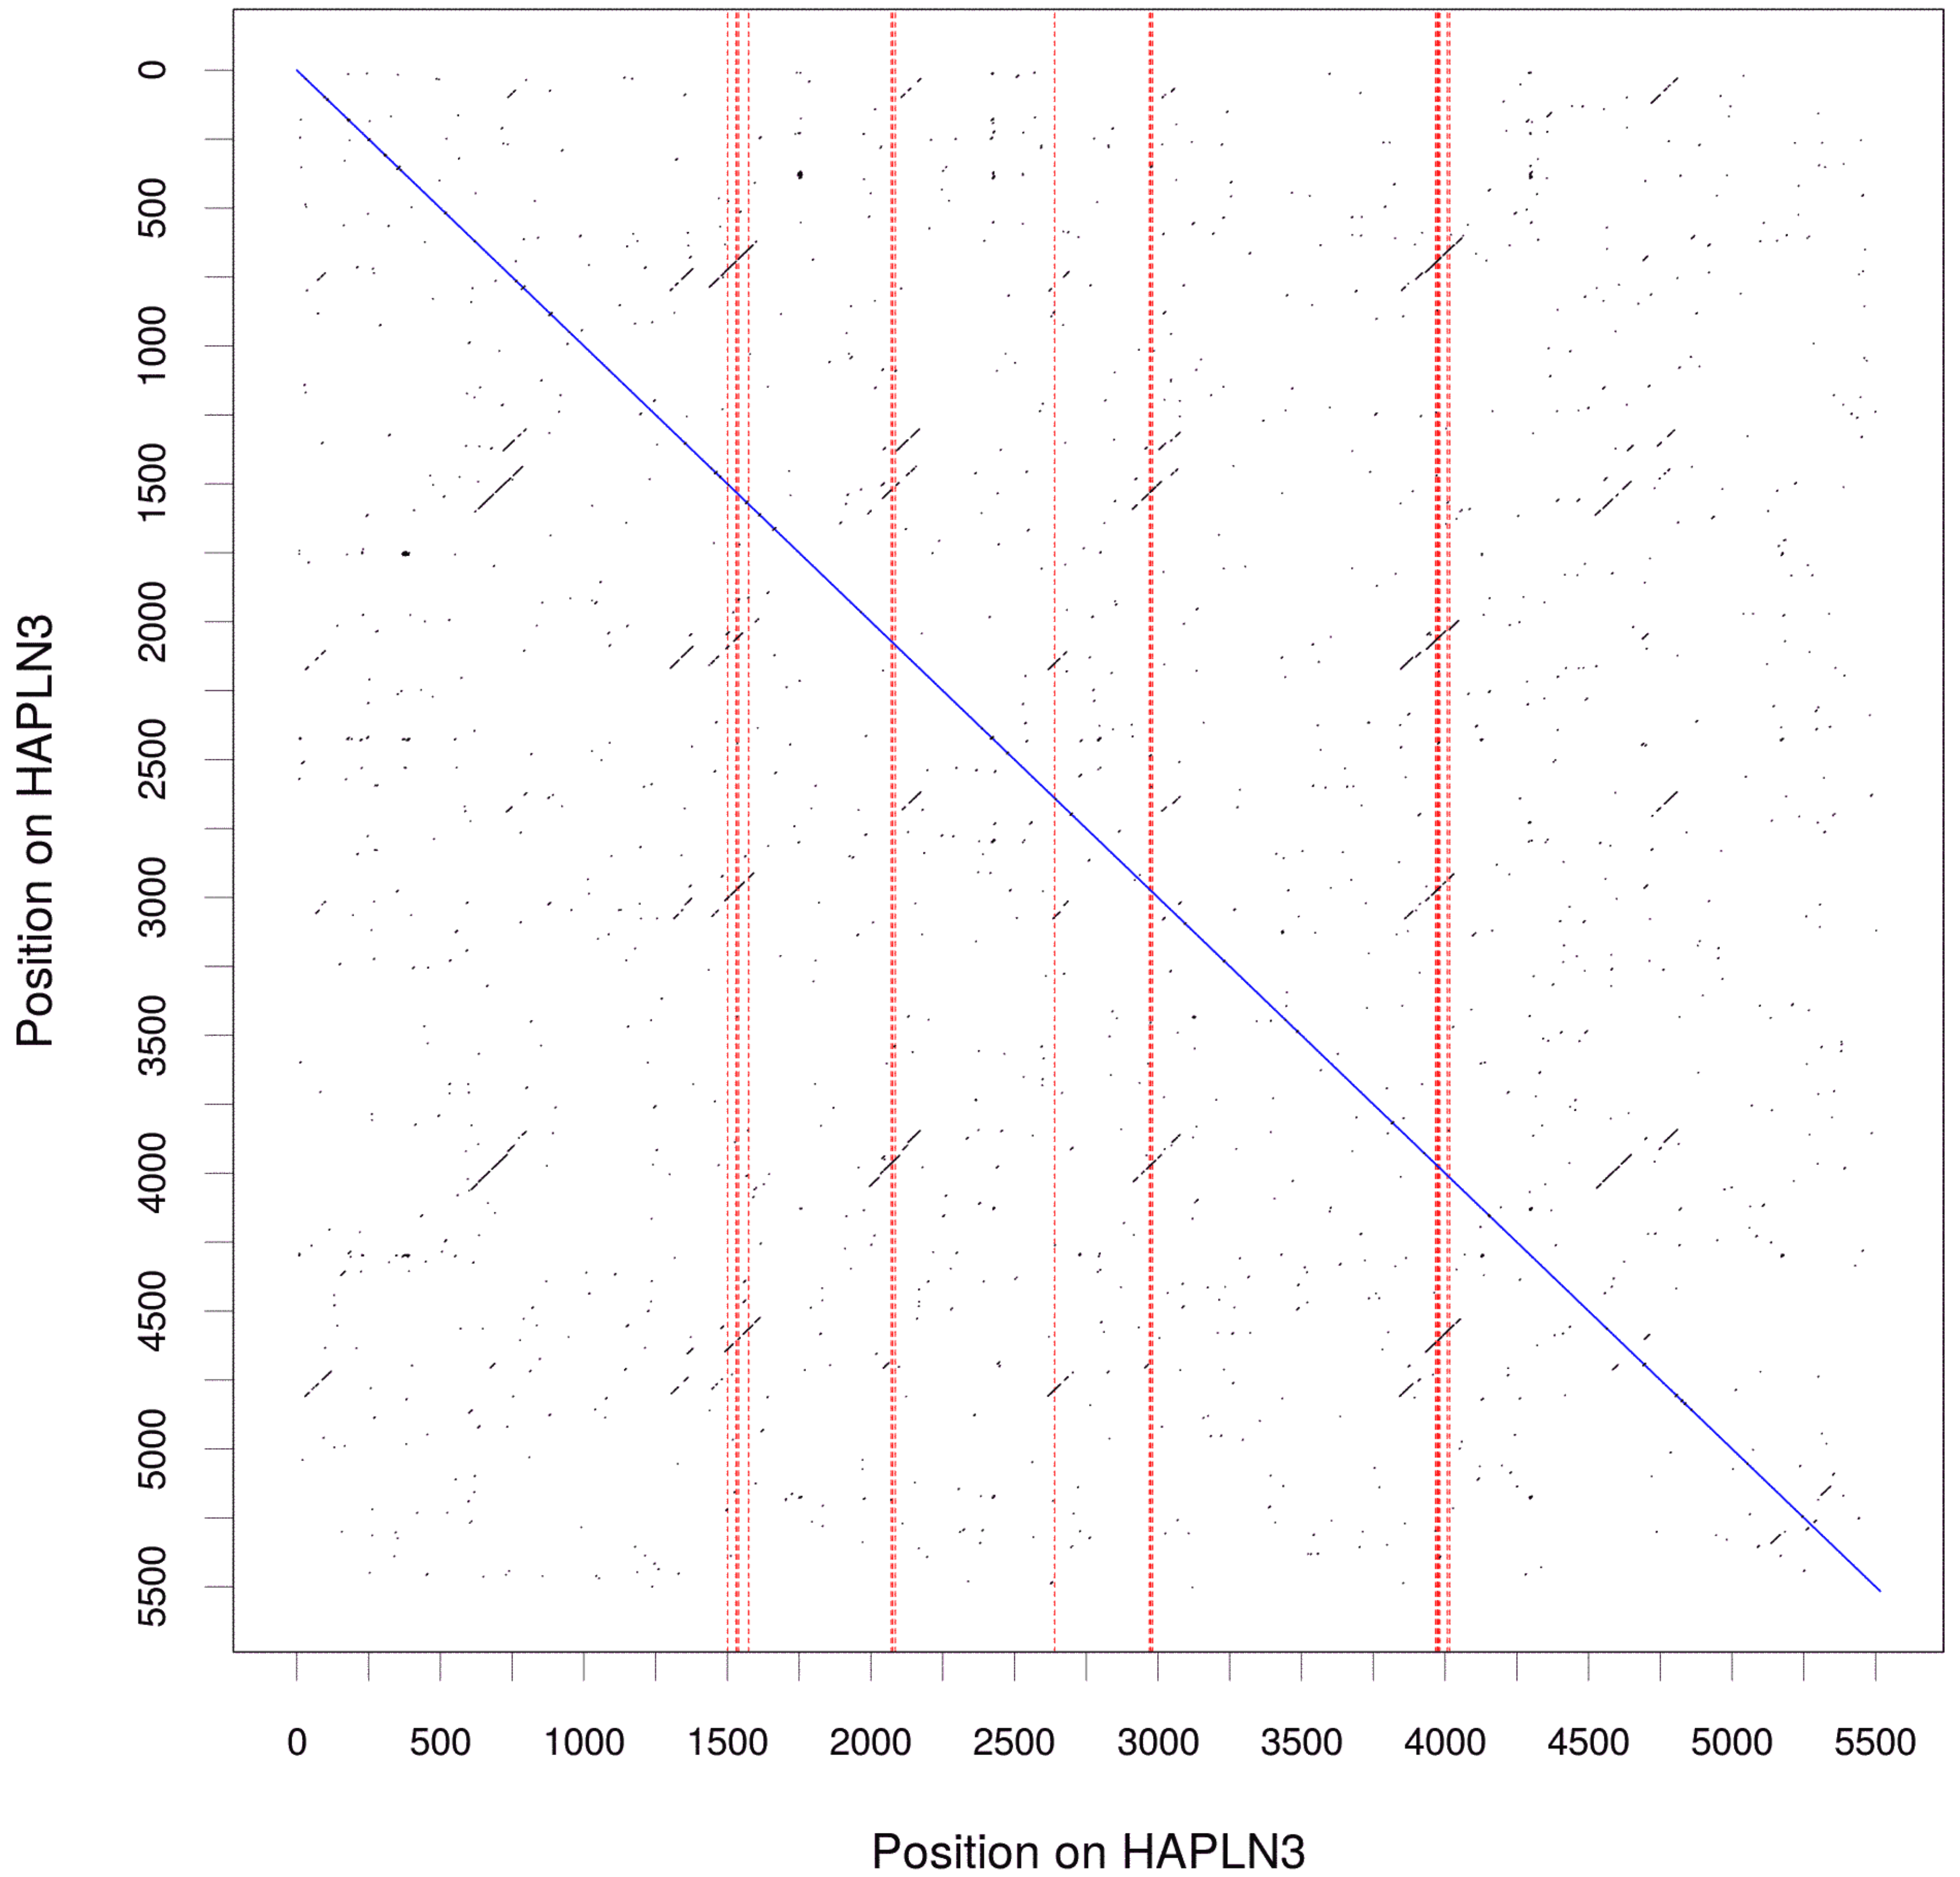

# HBP1

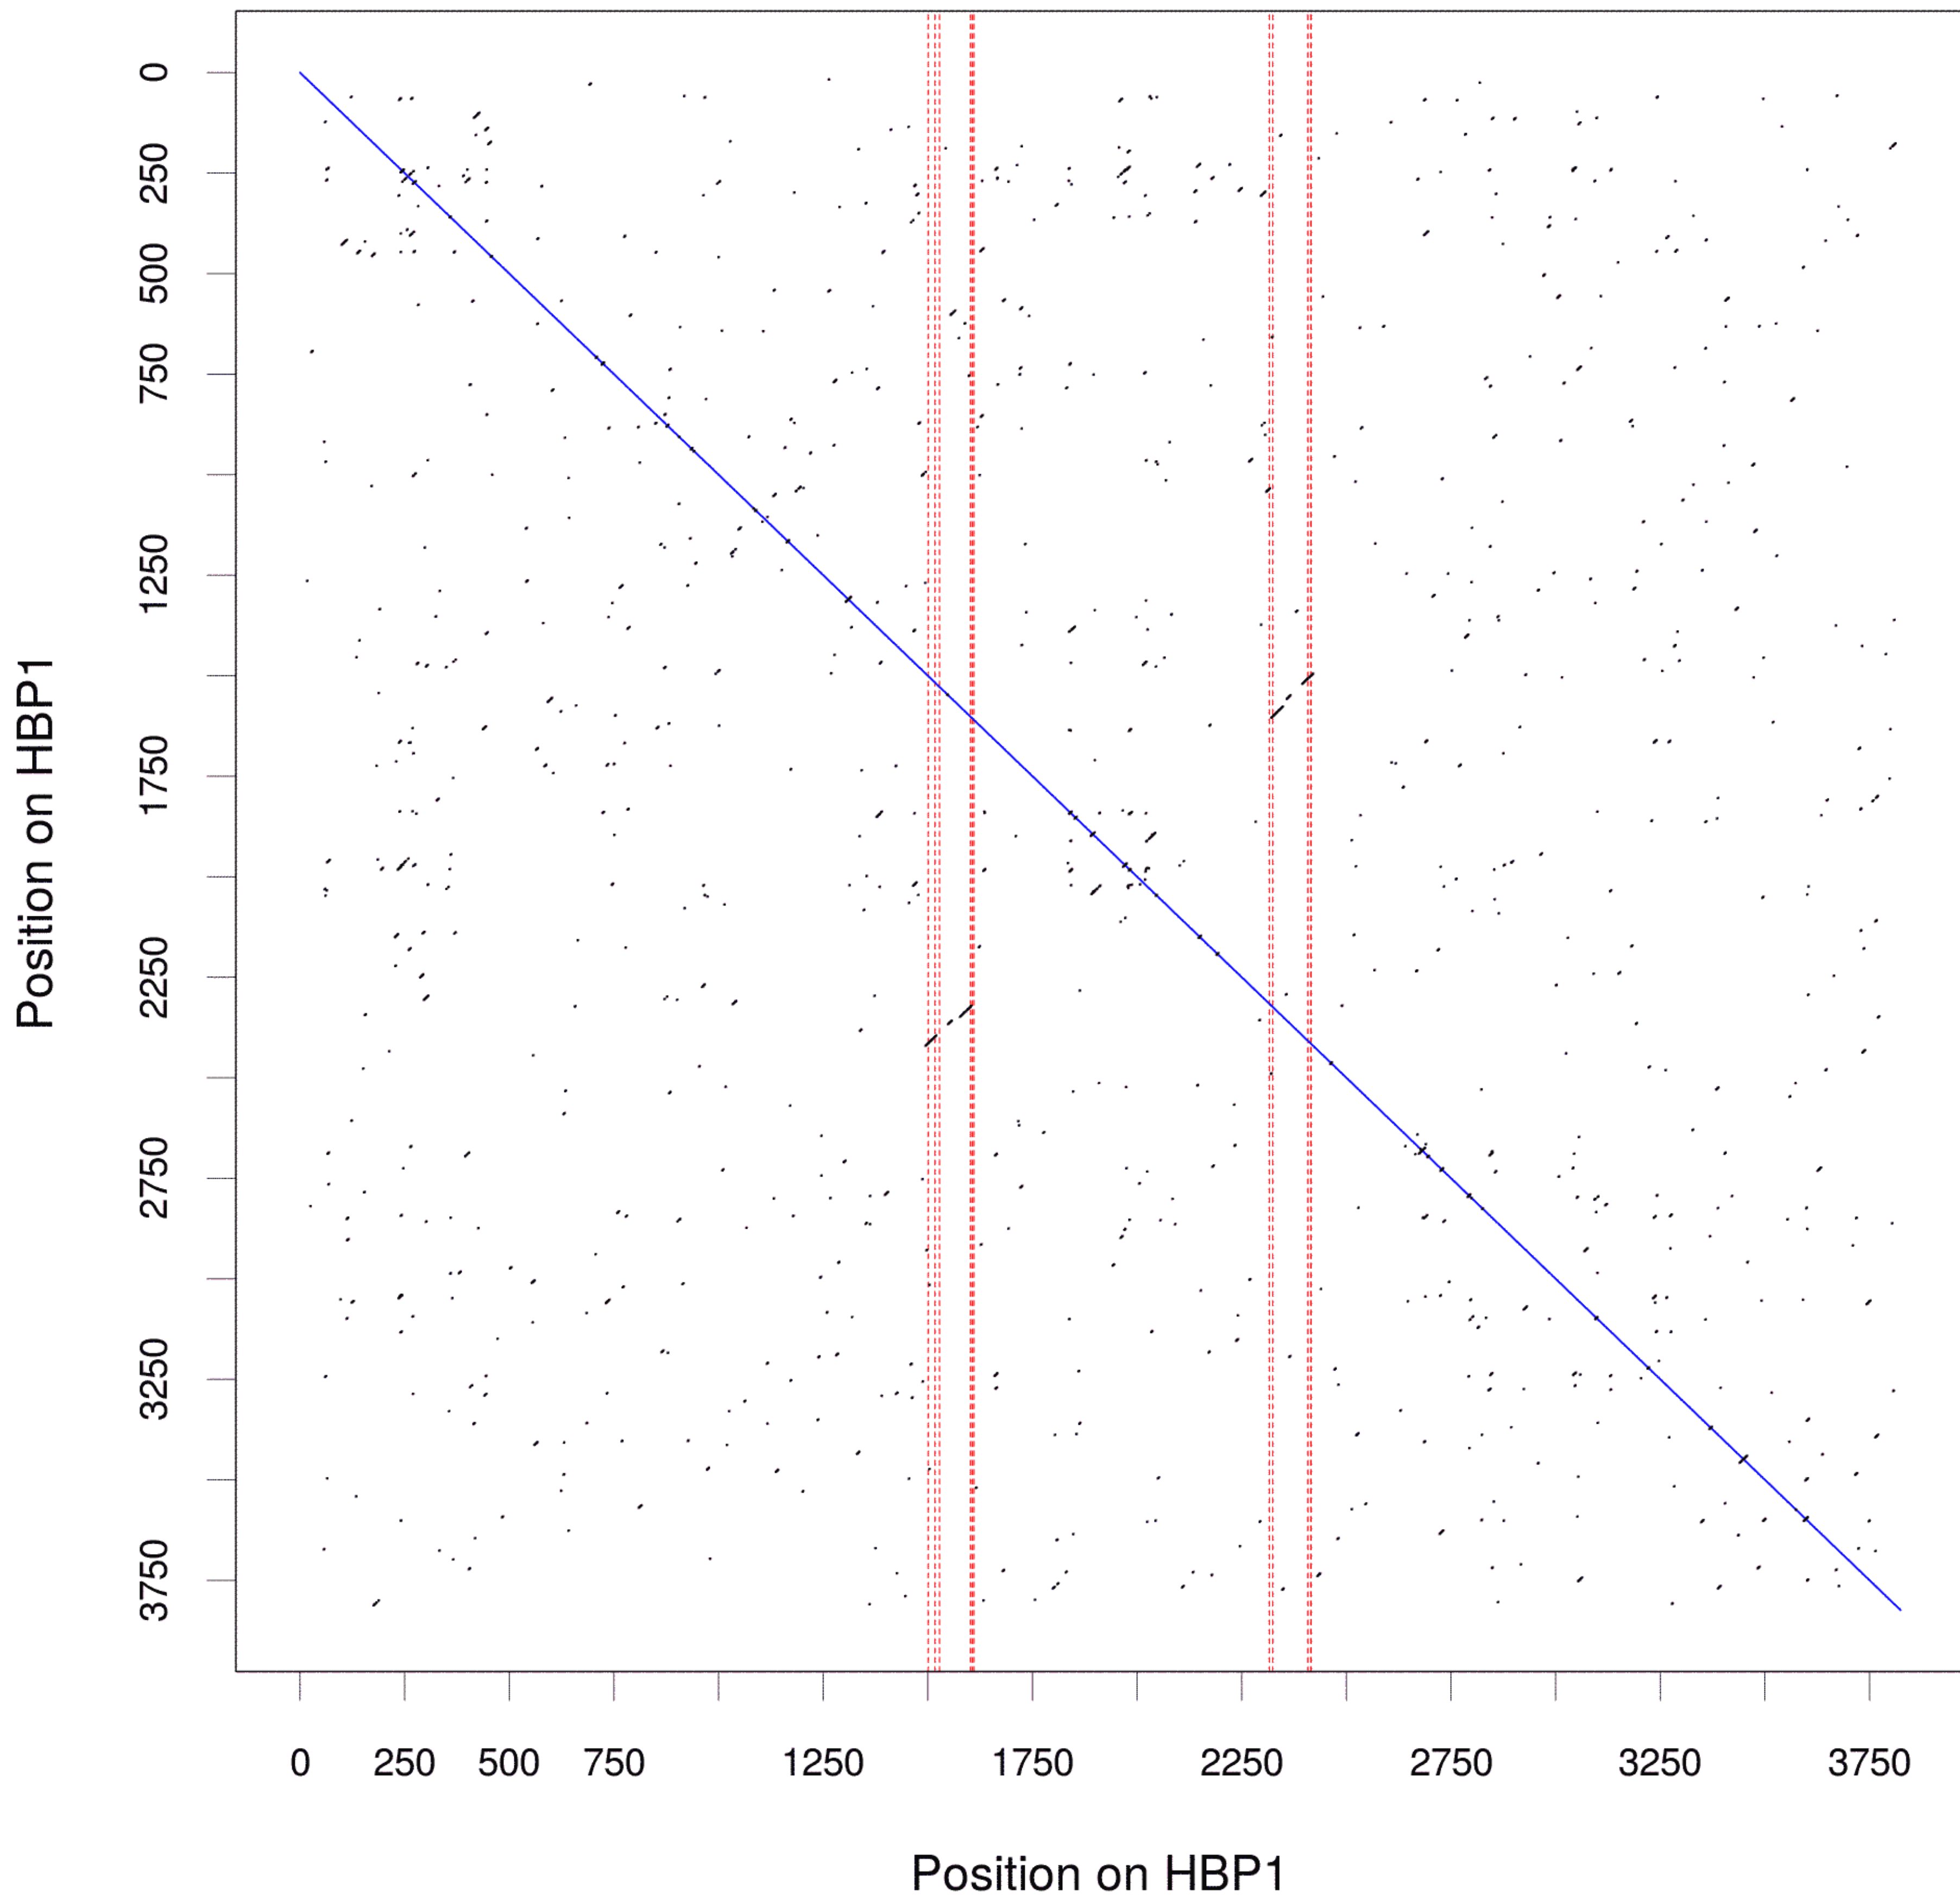



# HELB

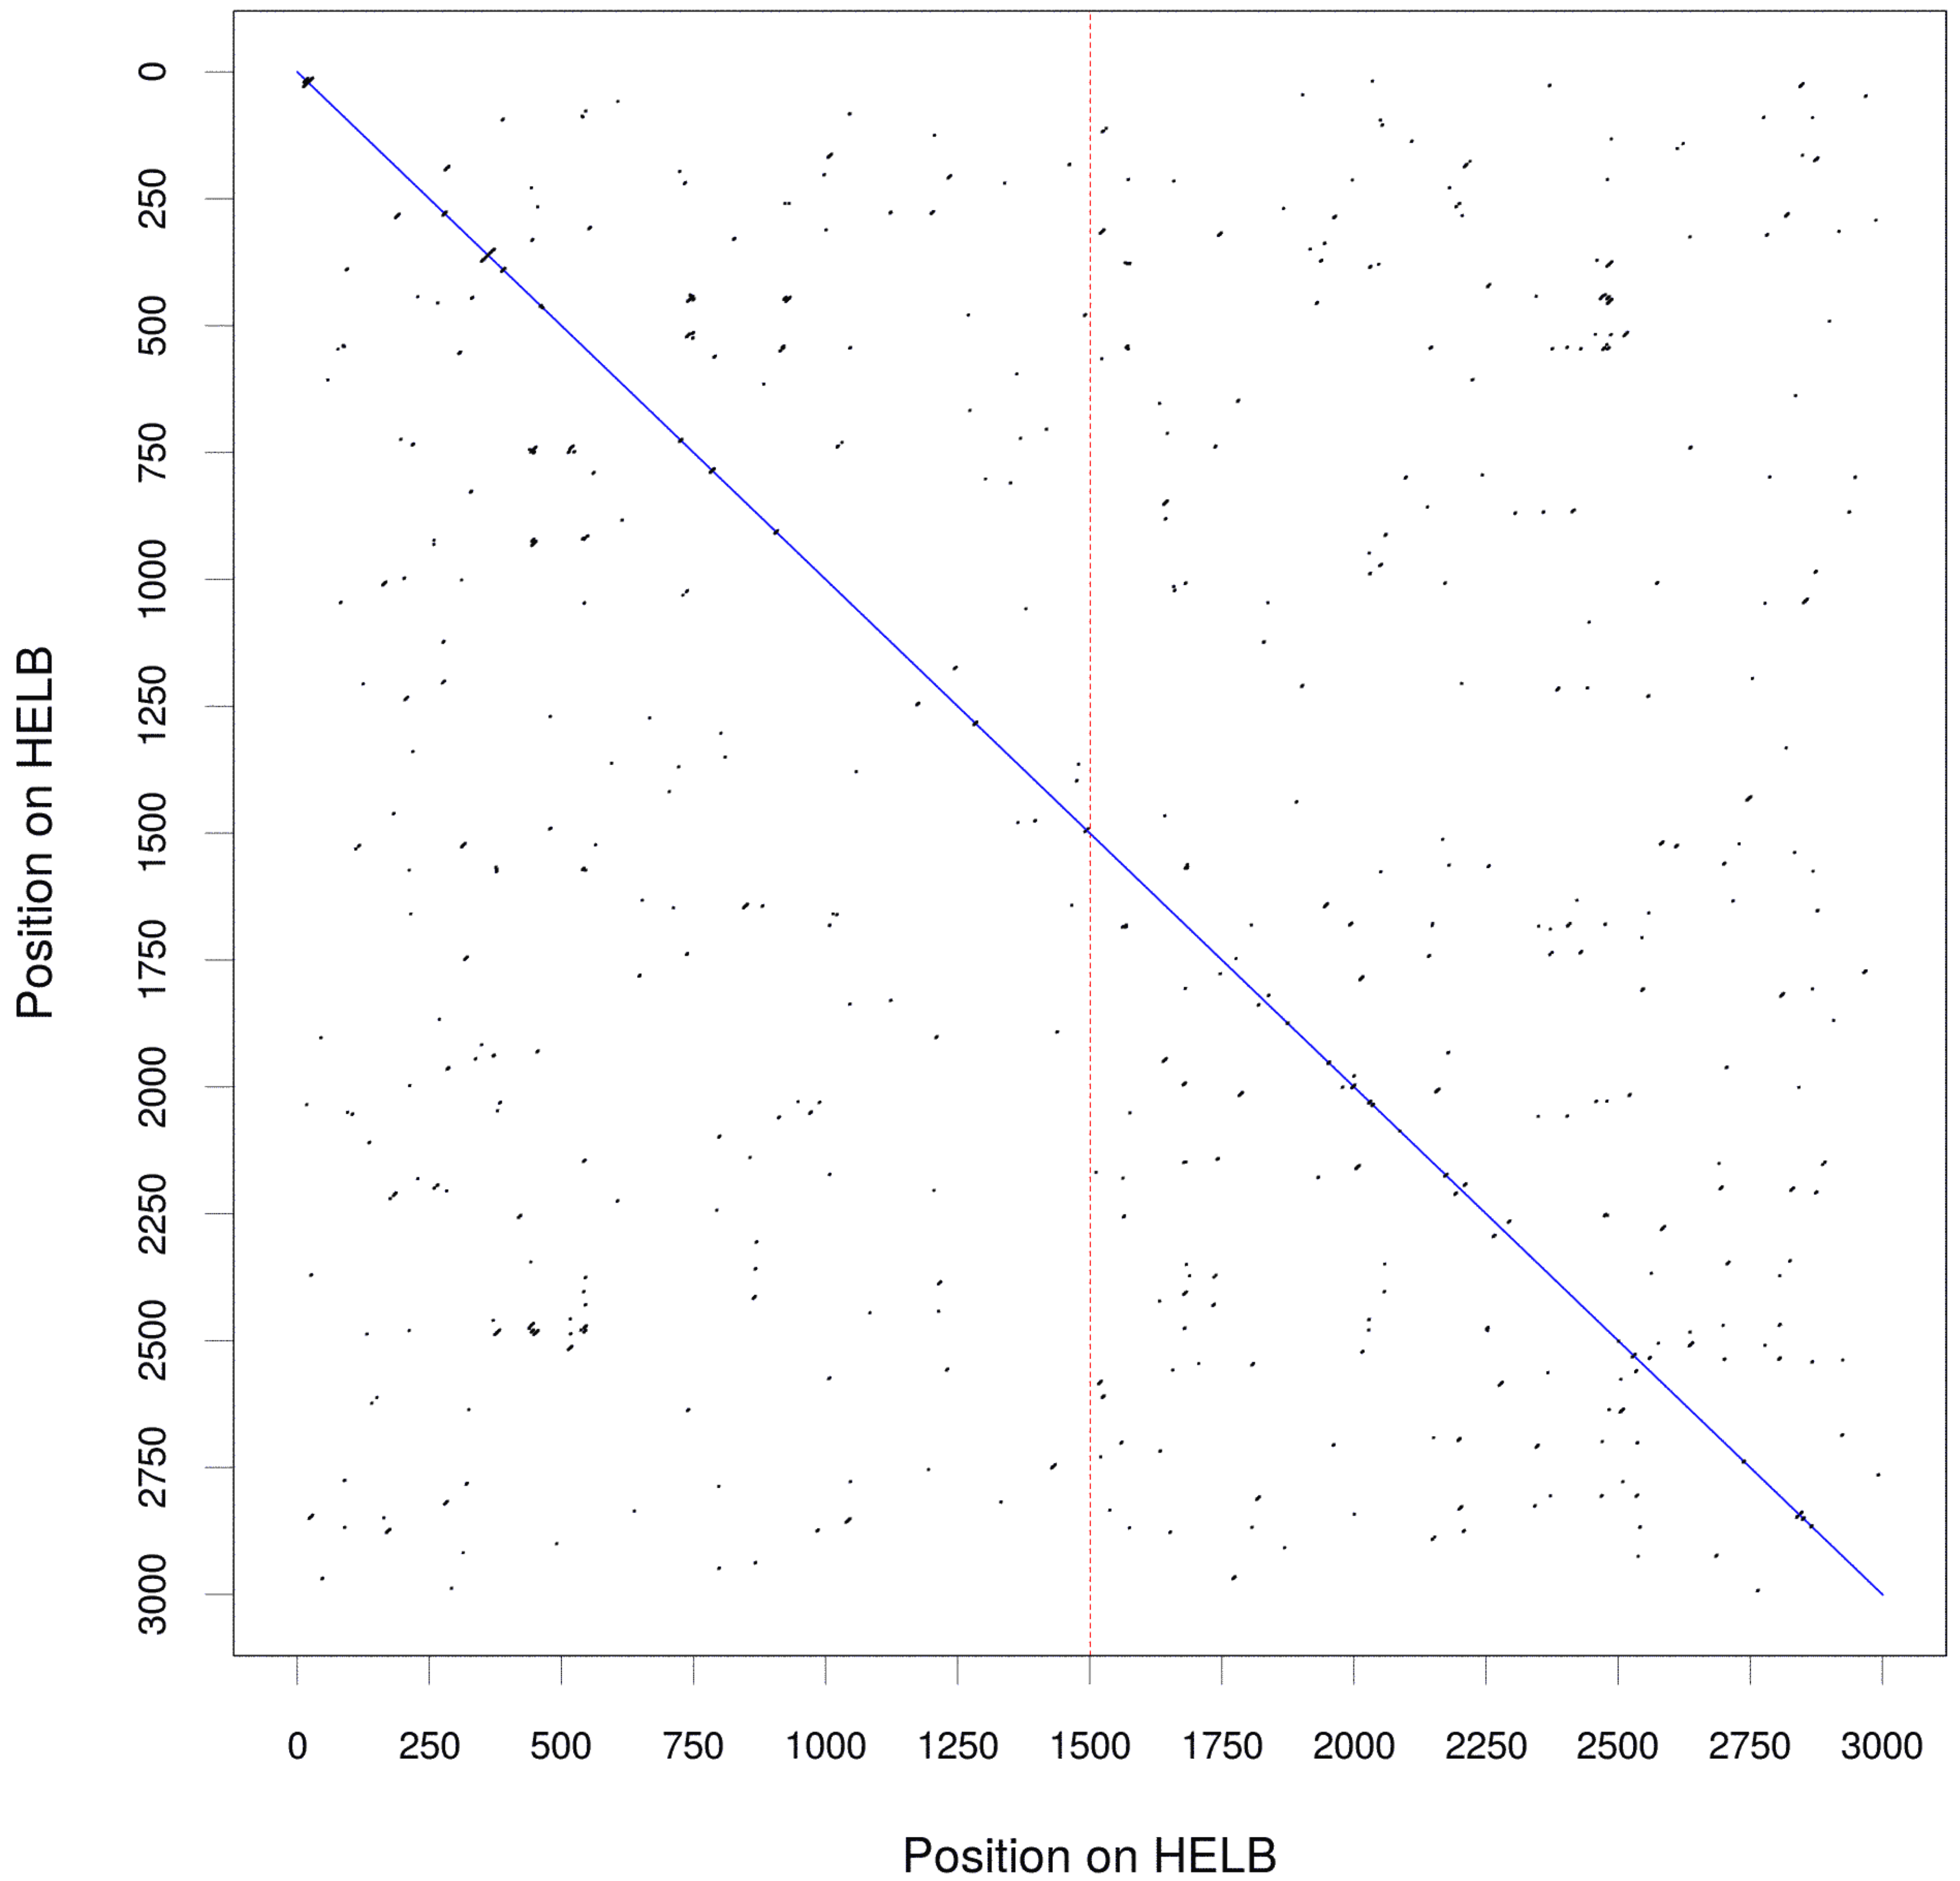

# HERPUD2

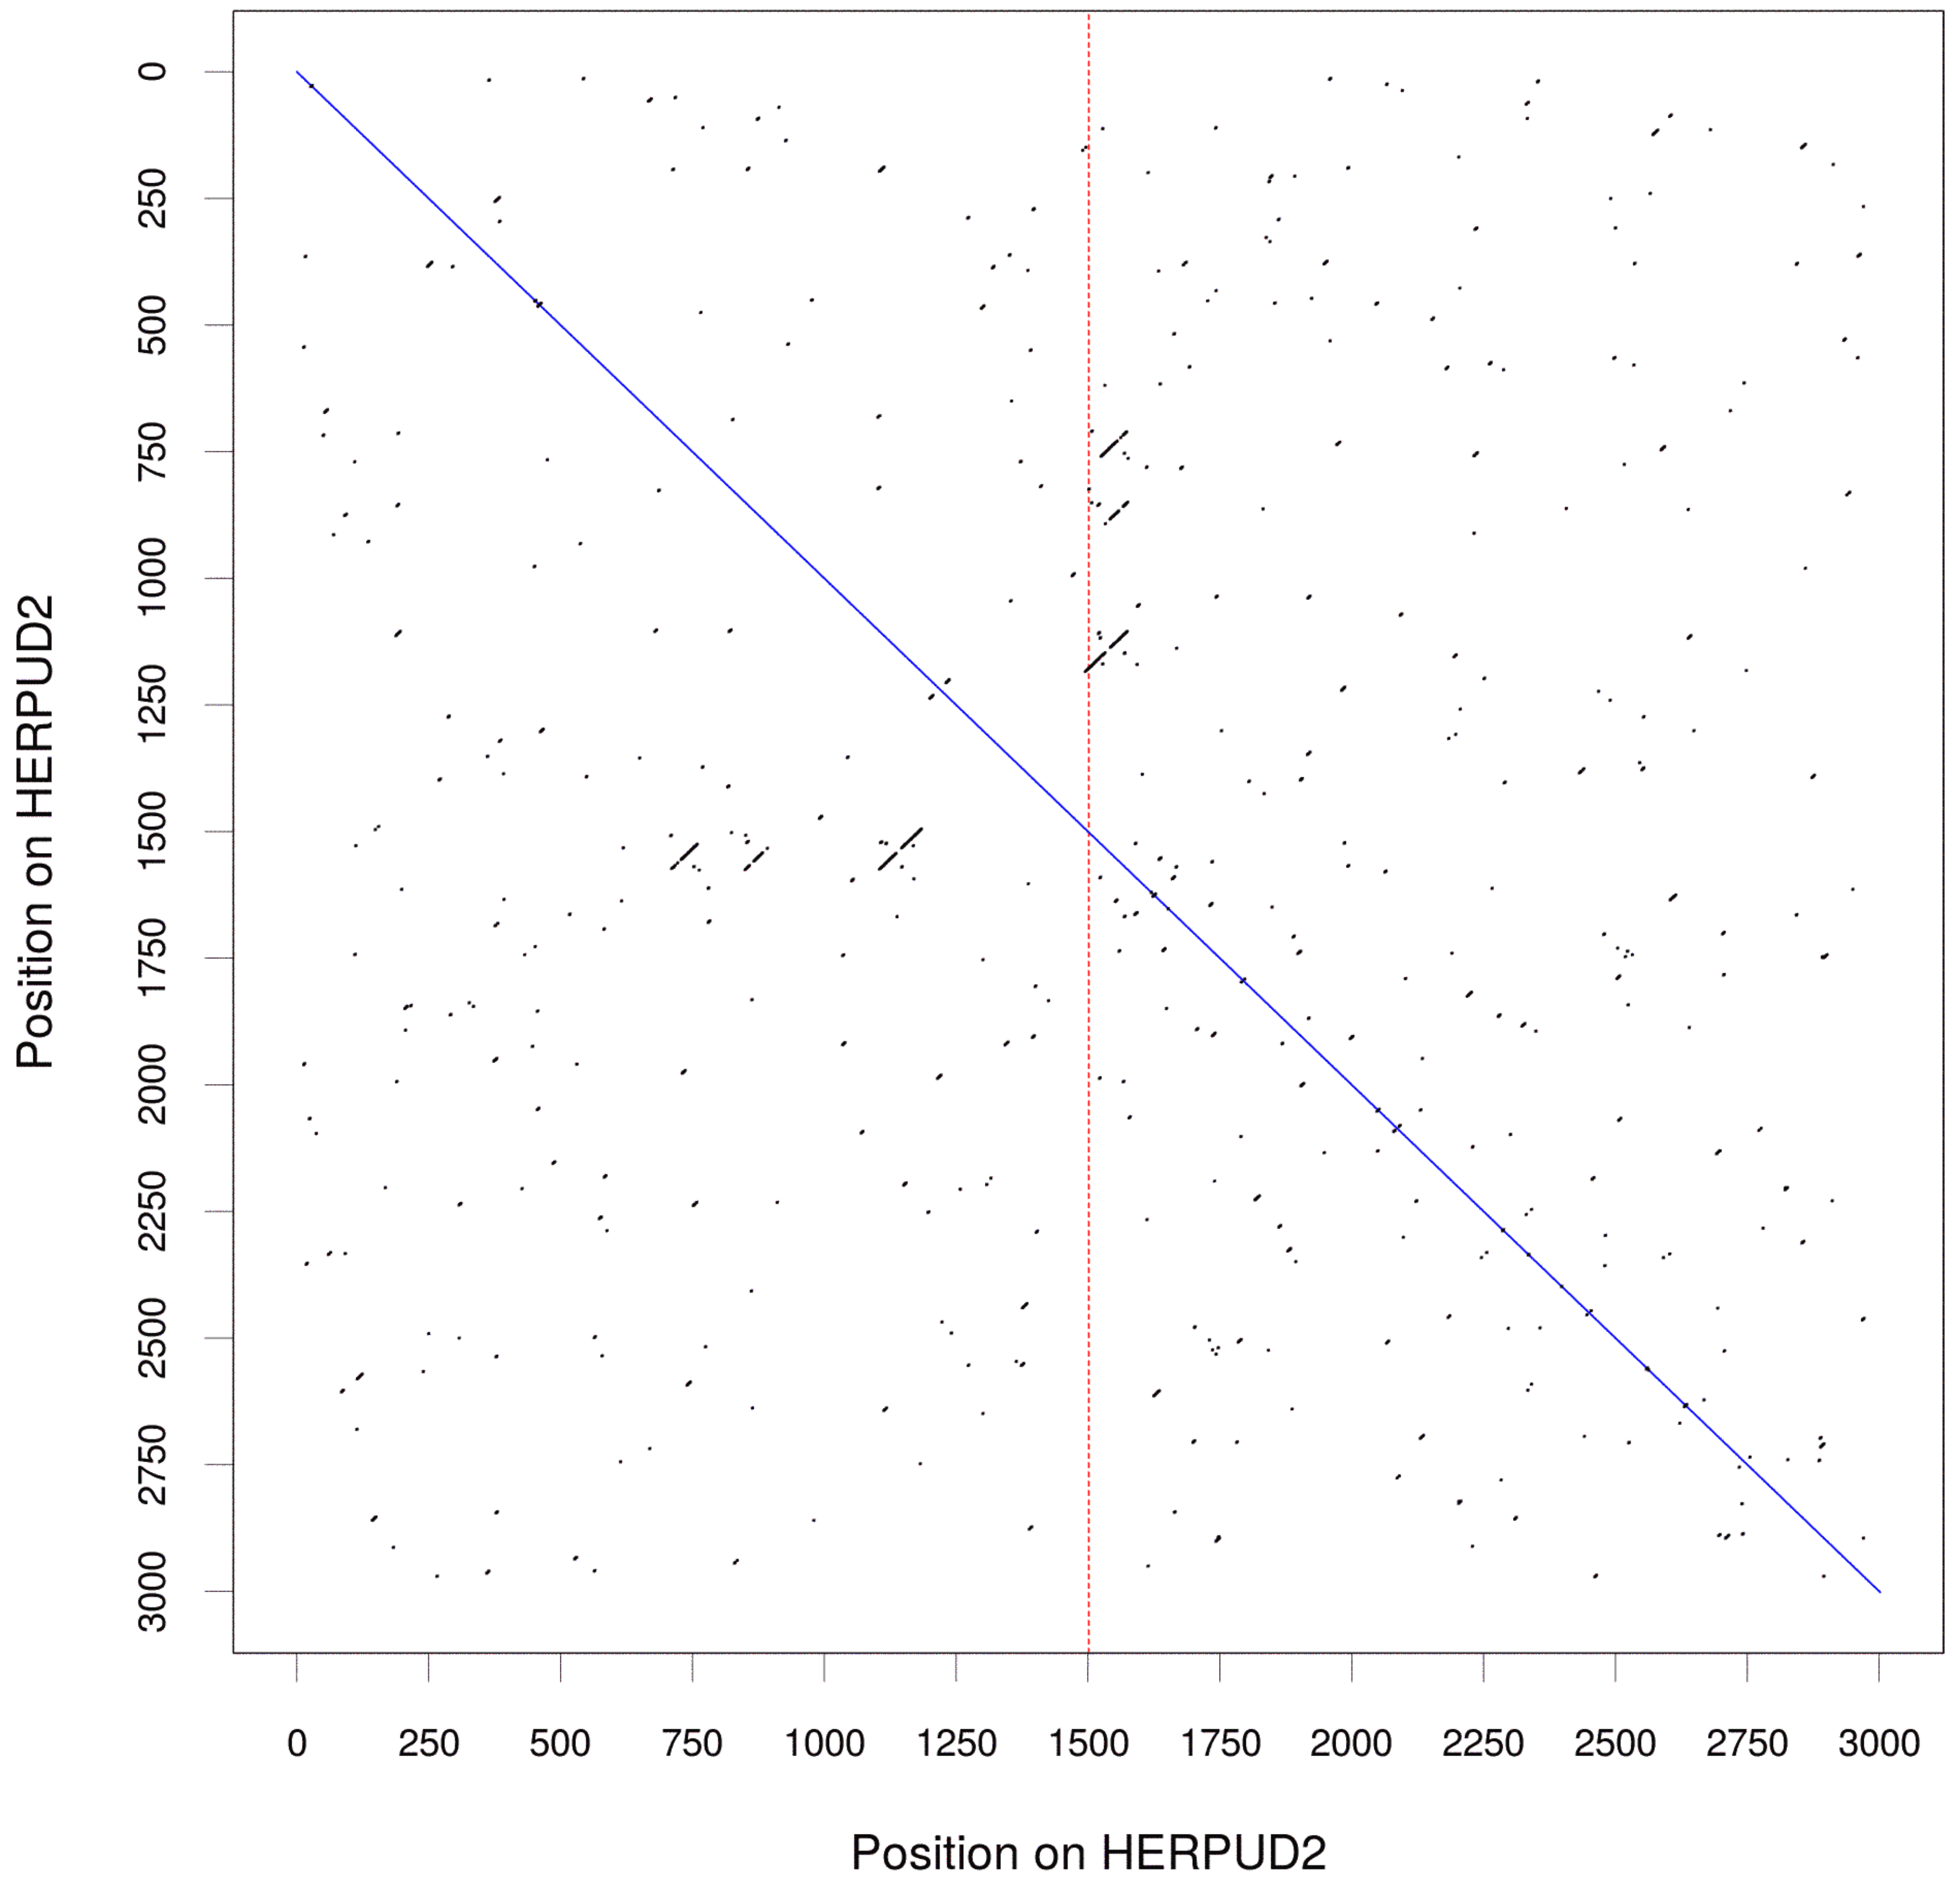

# HHIPL2

Position on HHIPL2

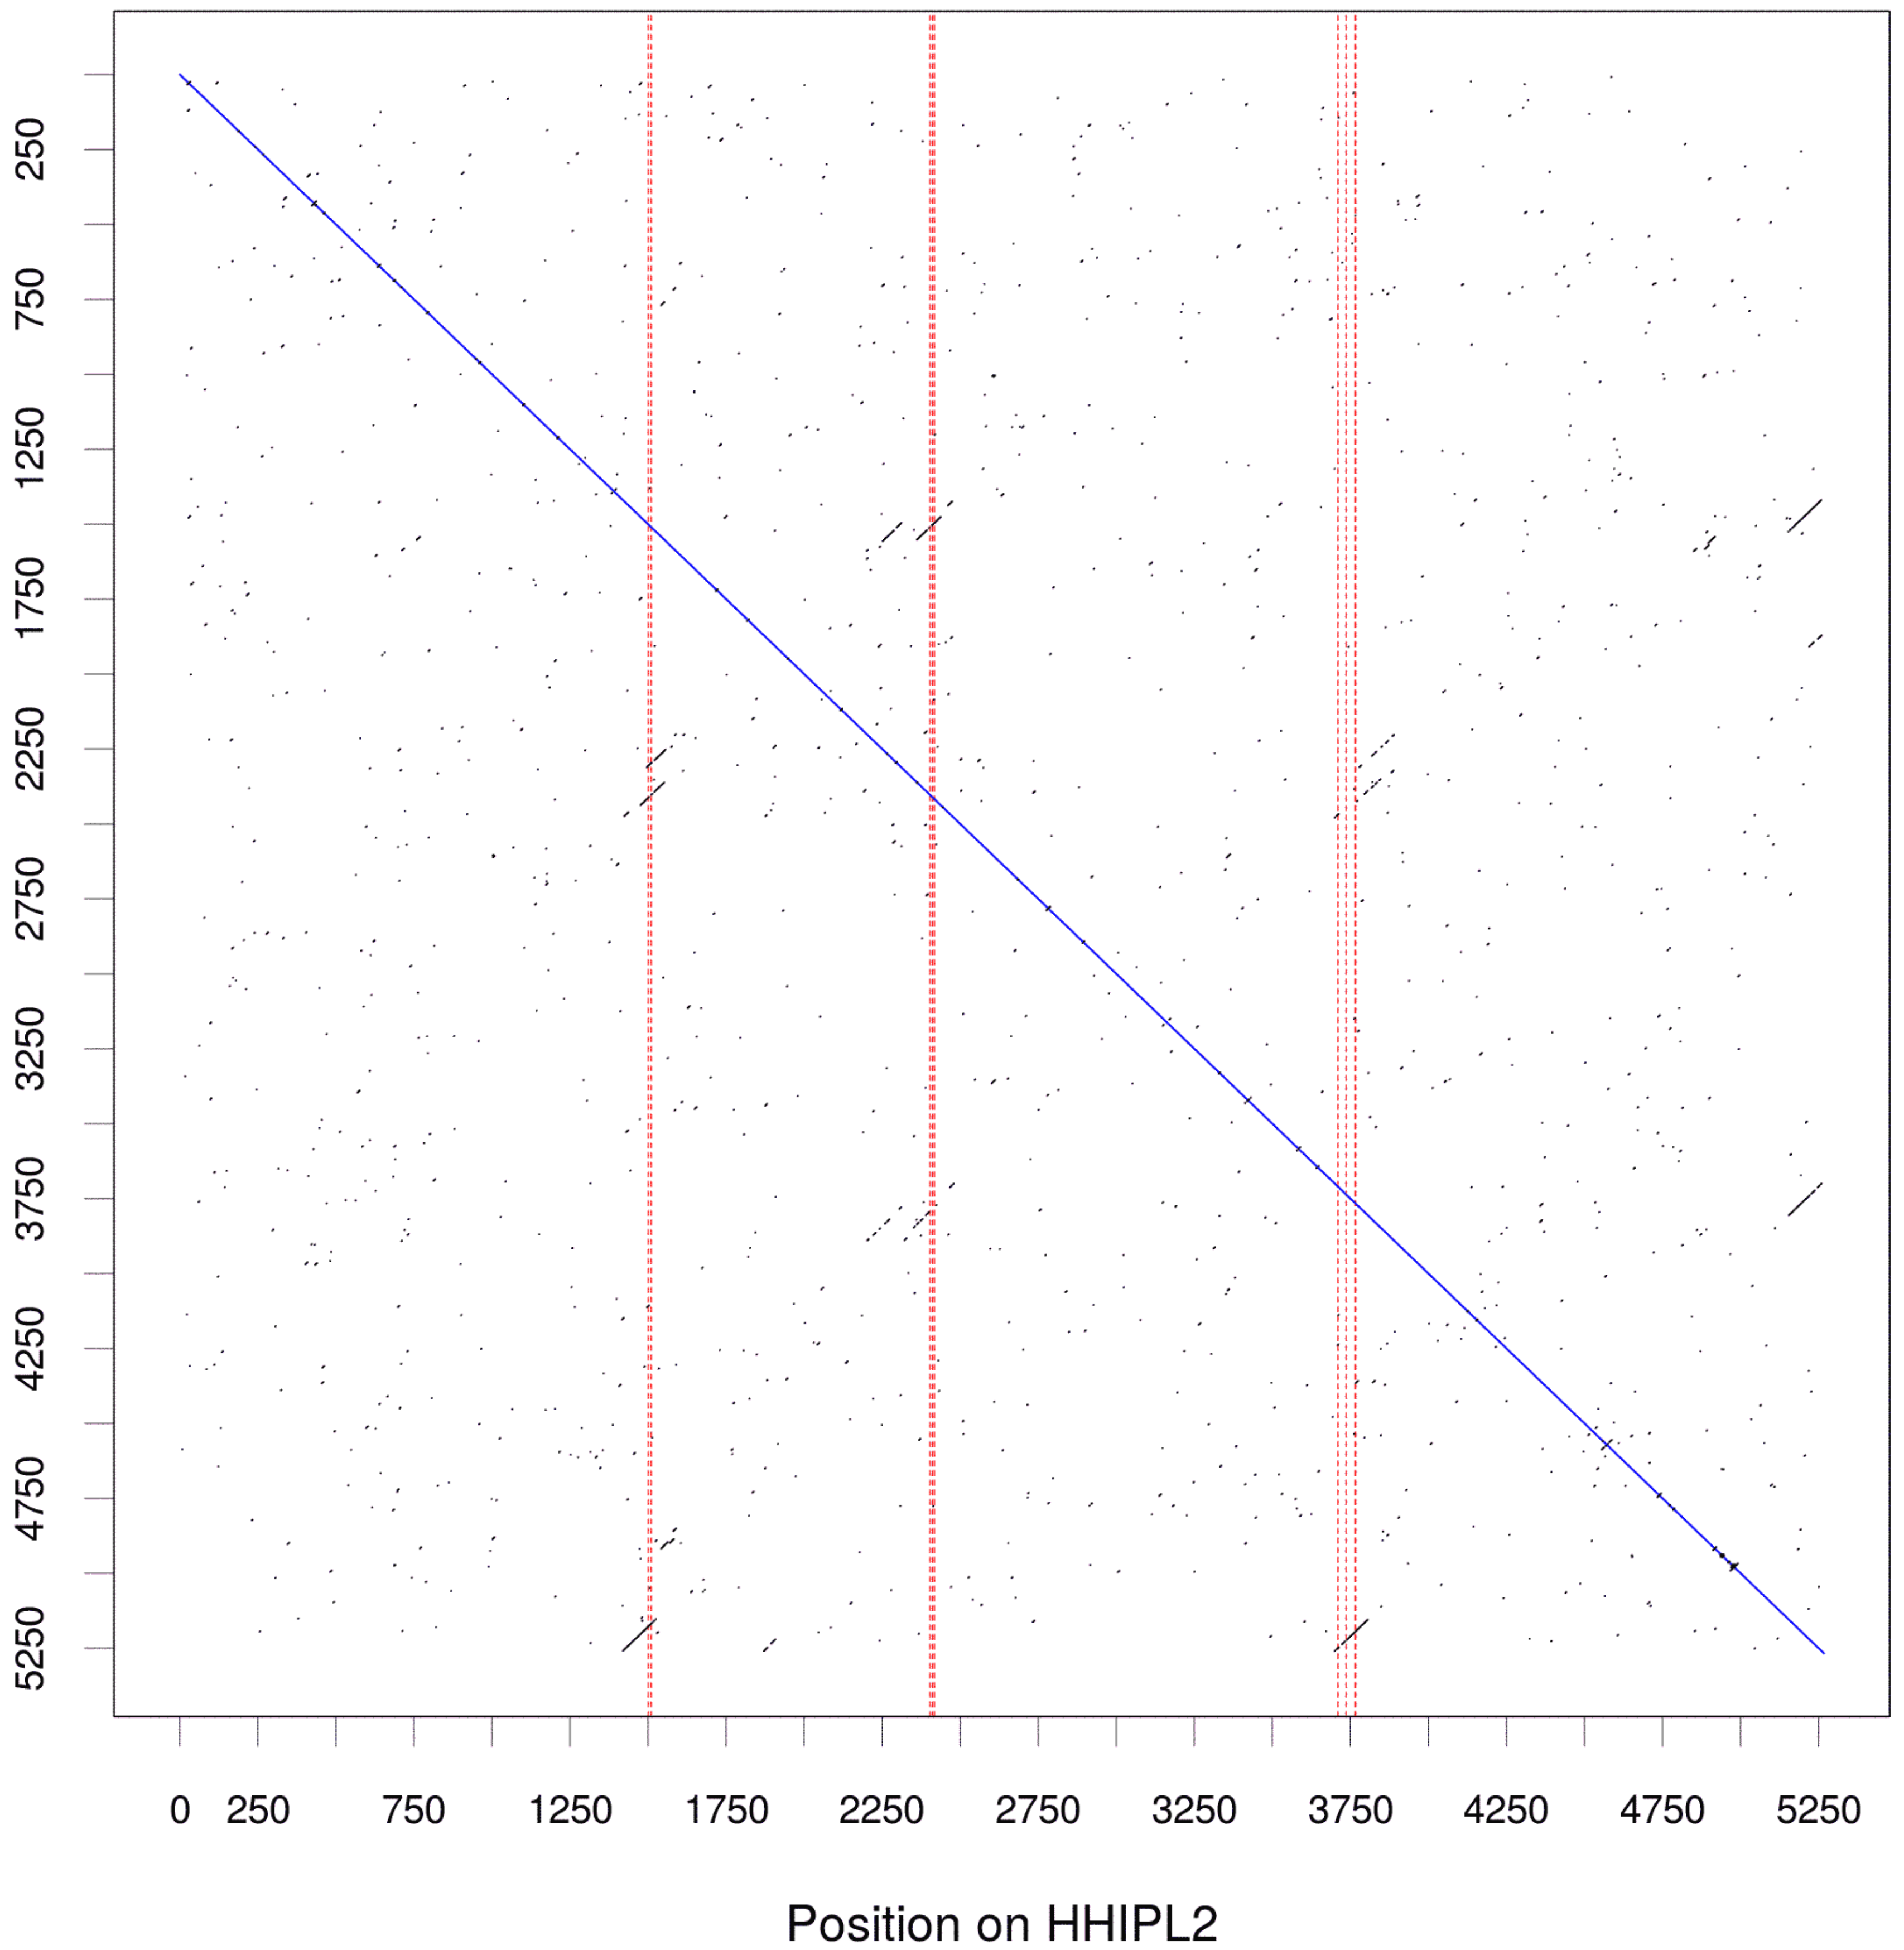

# HMGA1

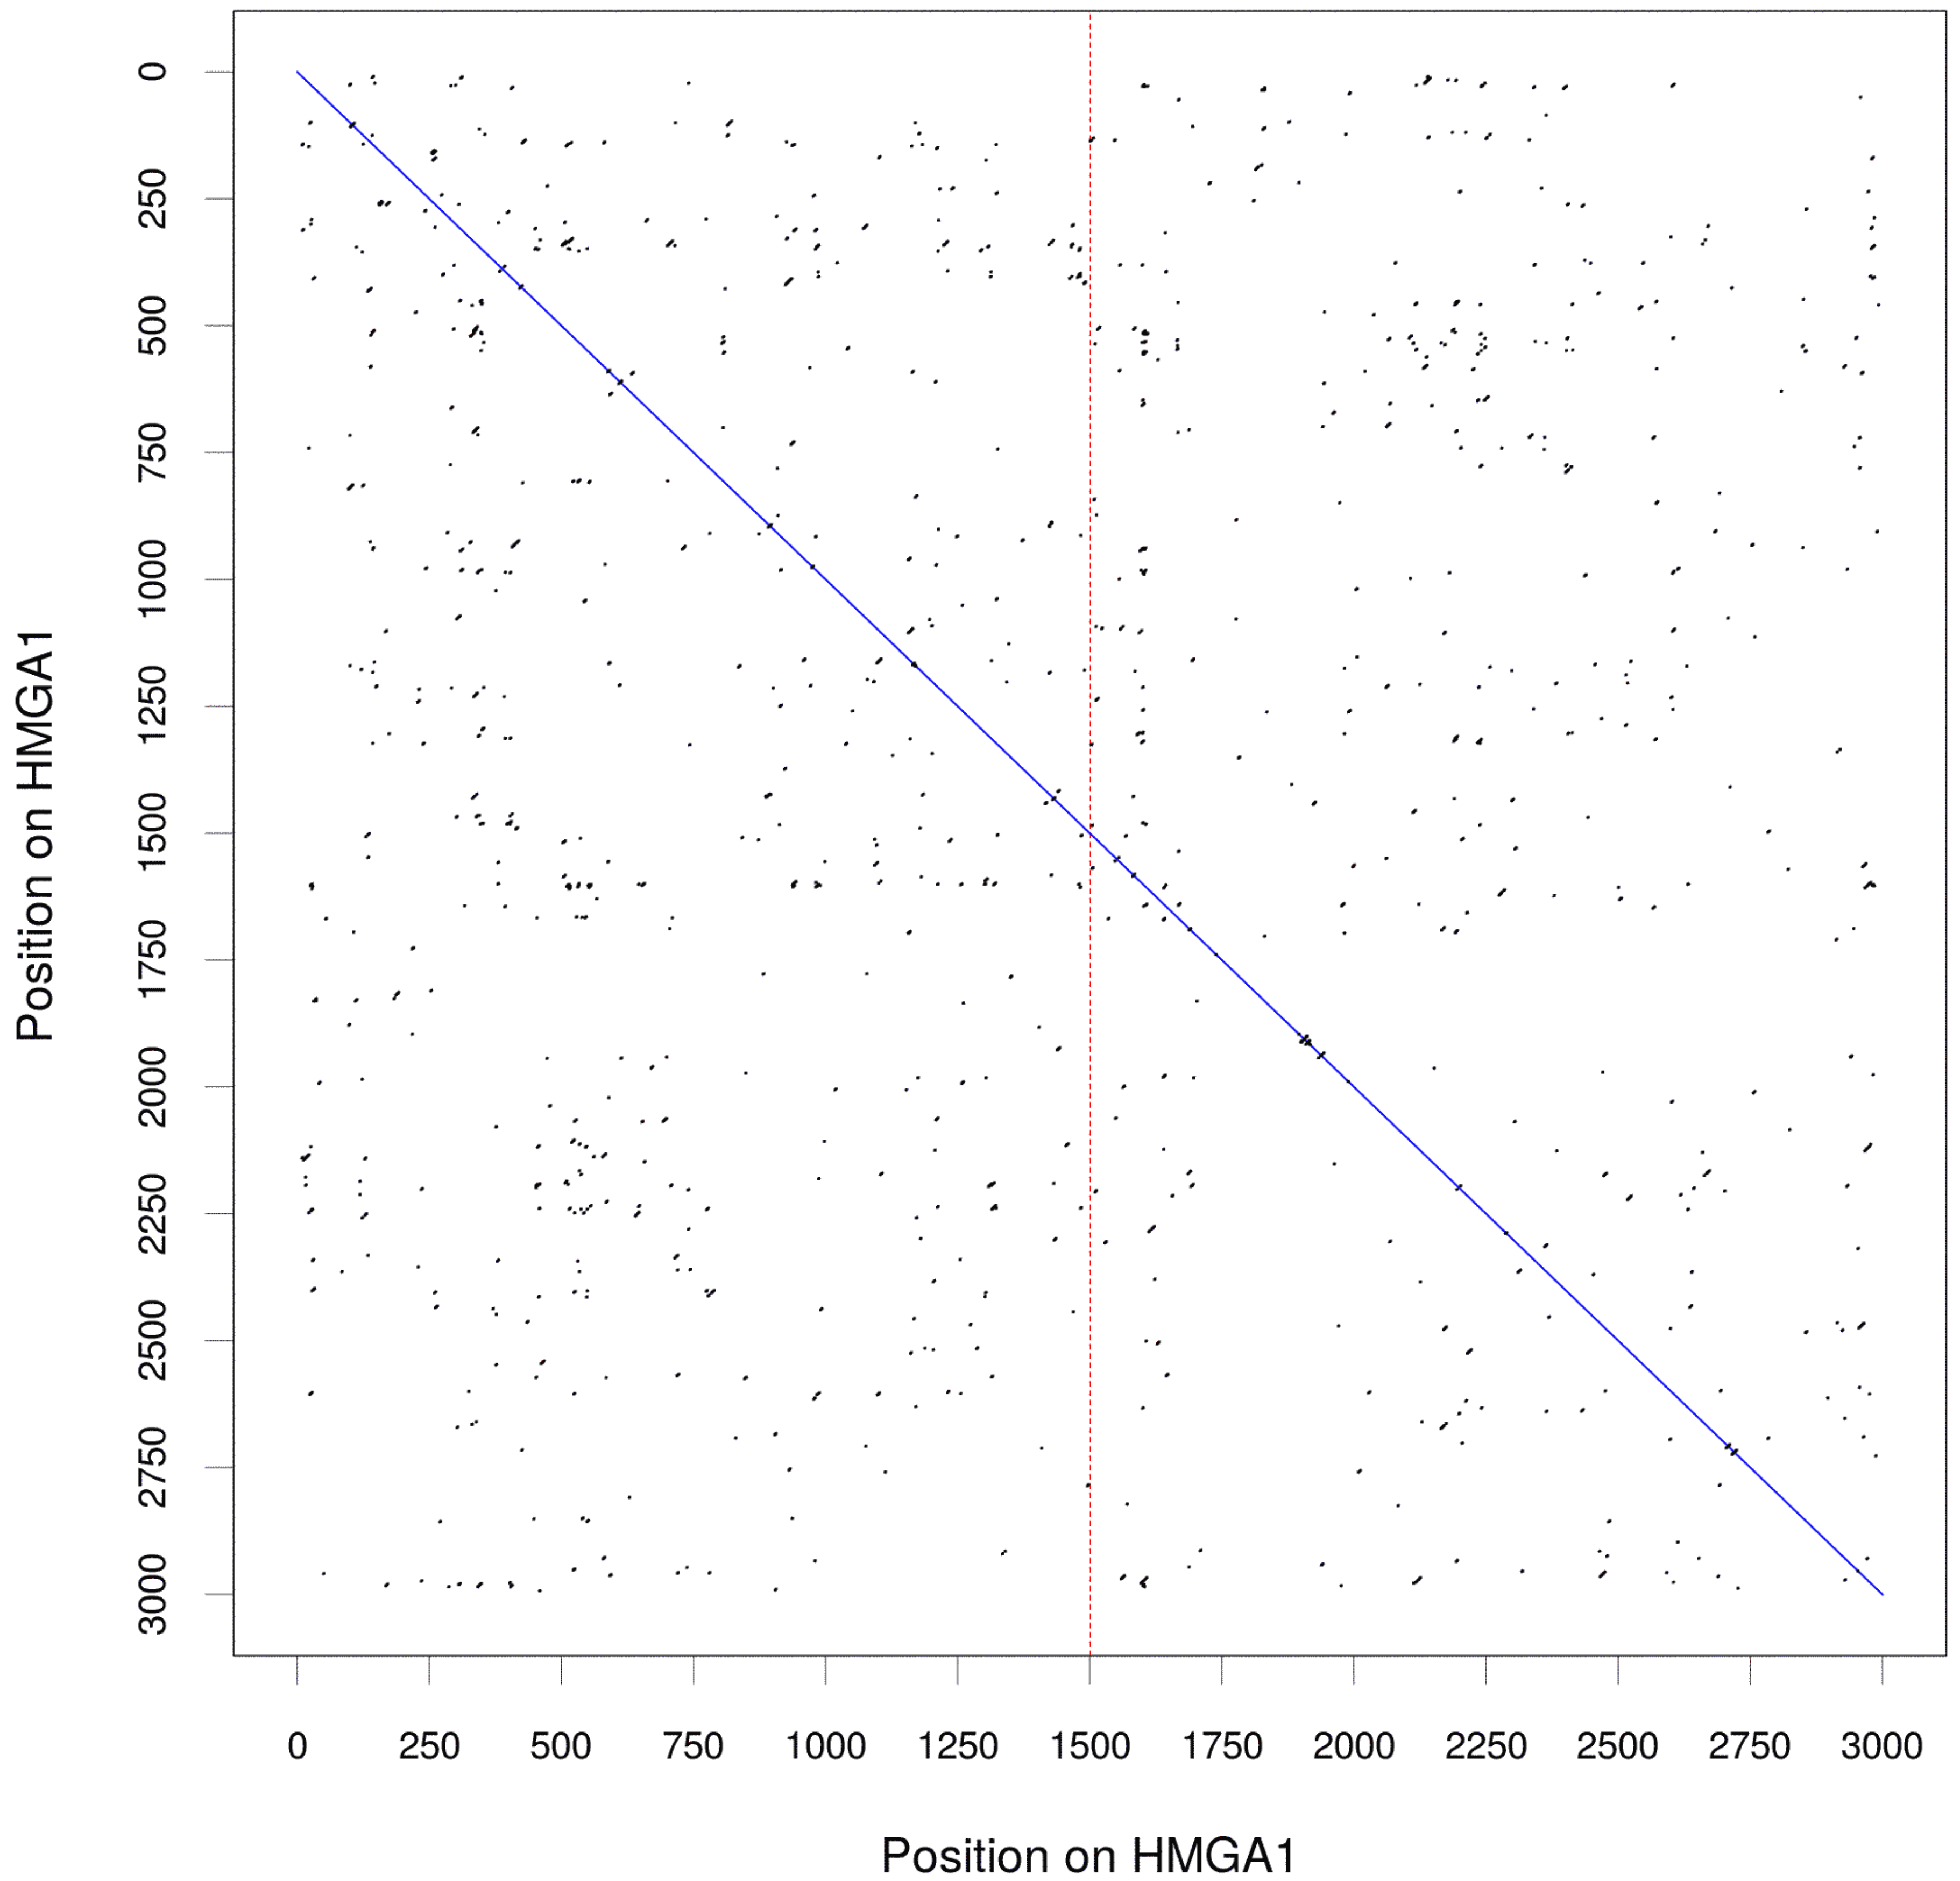

# HMGN3

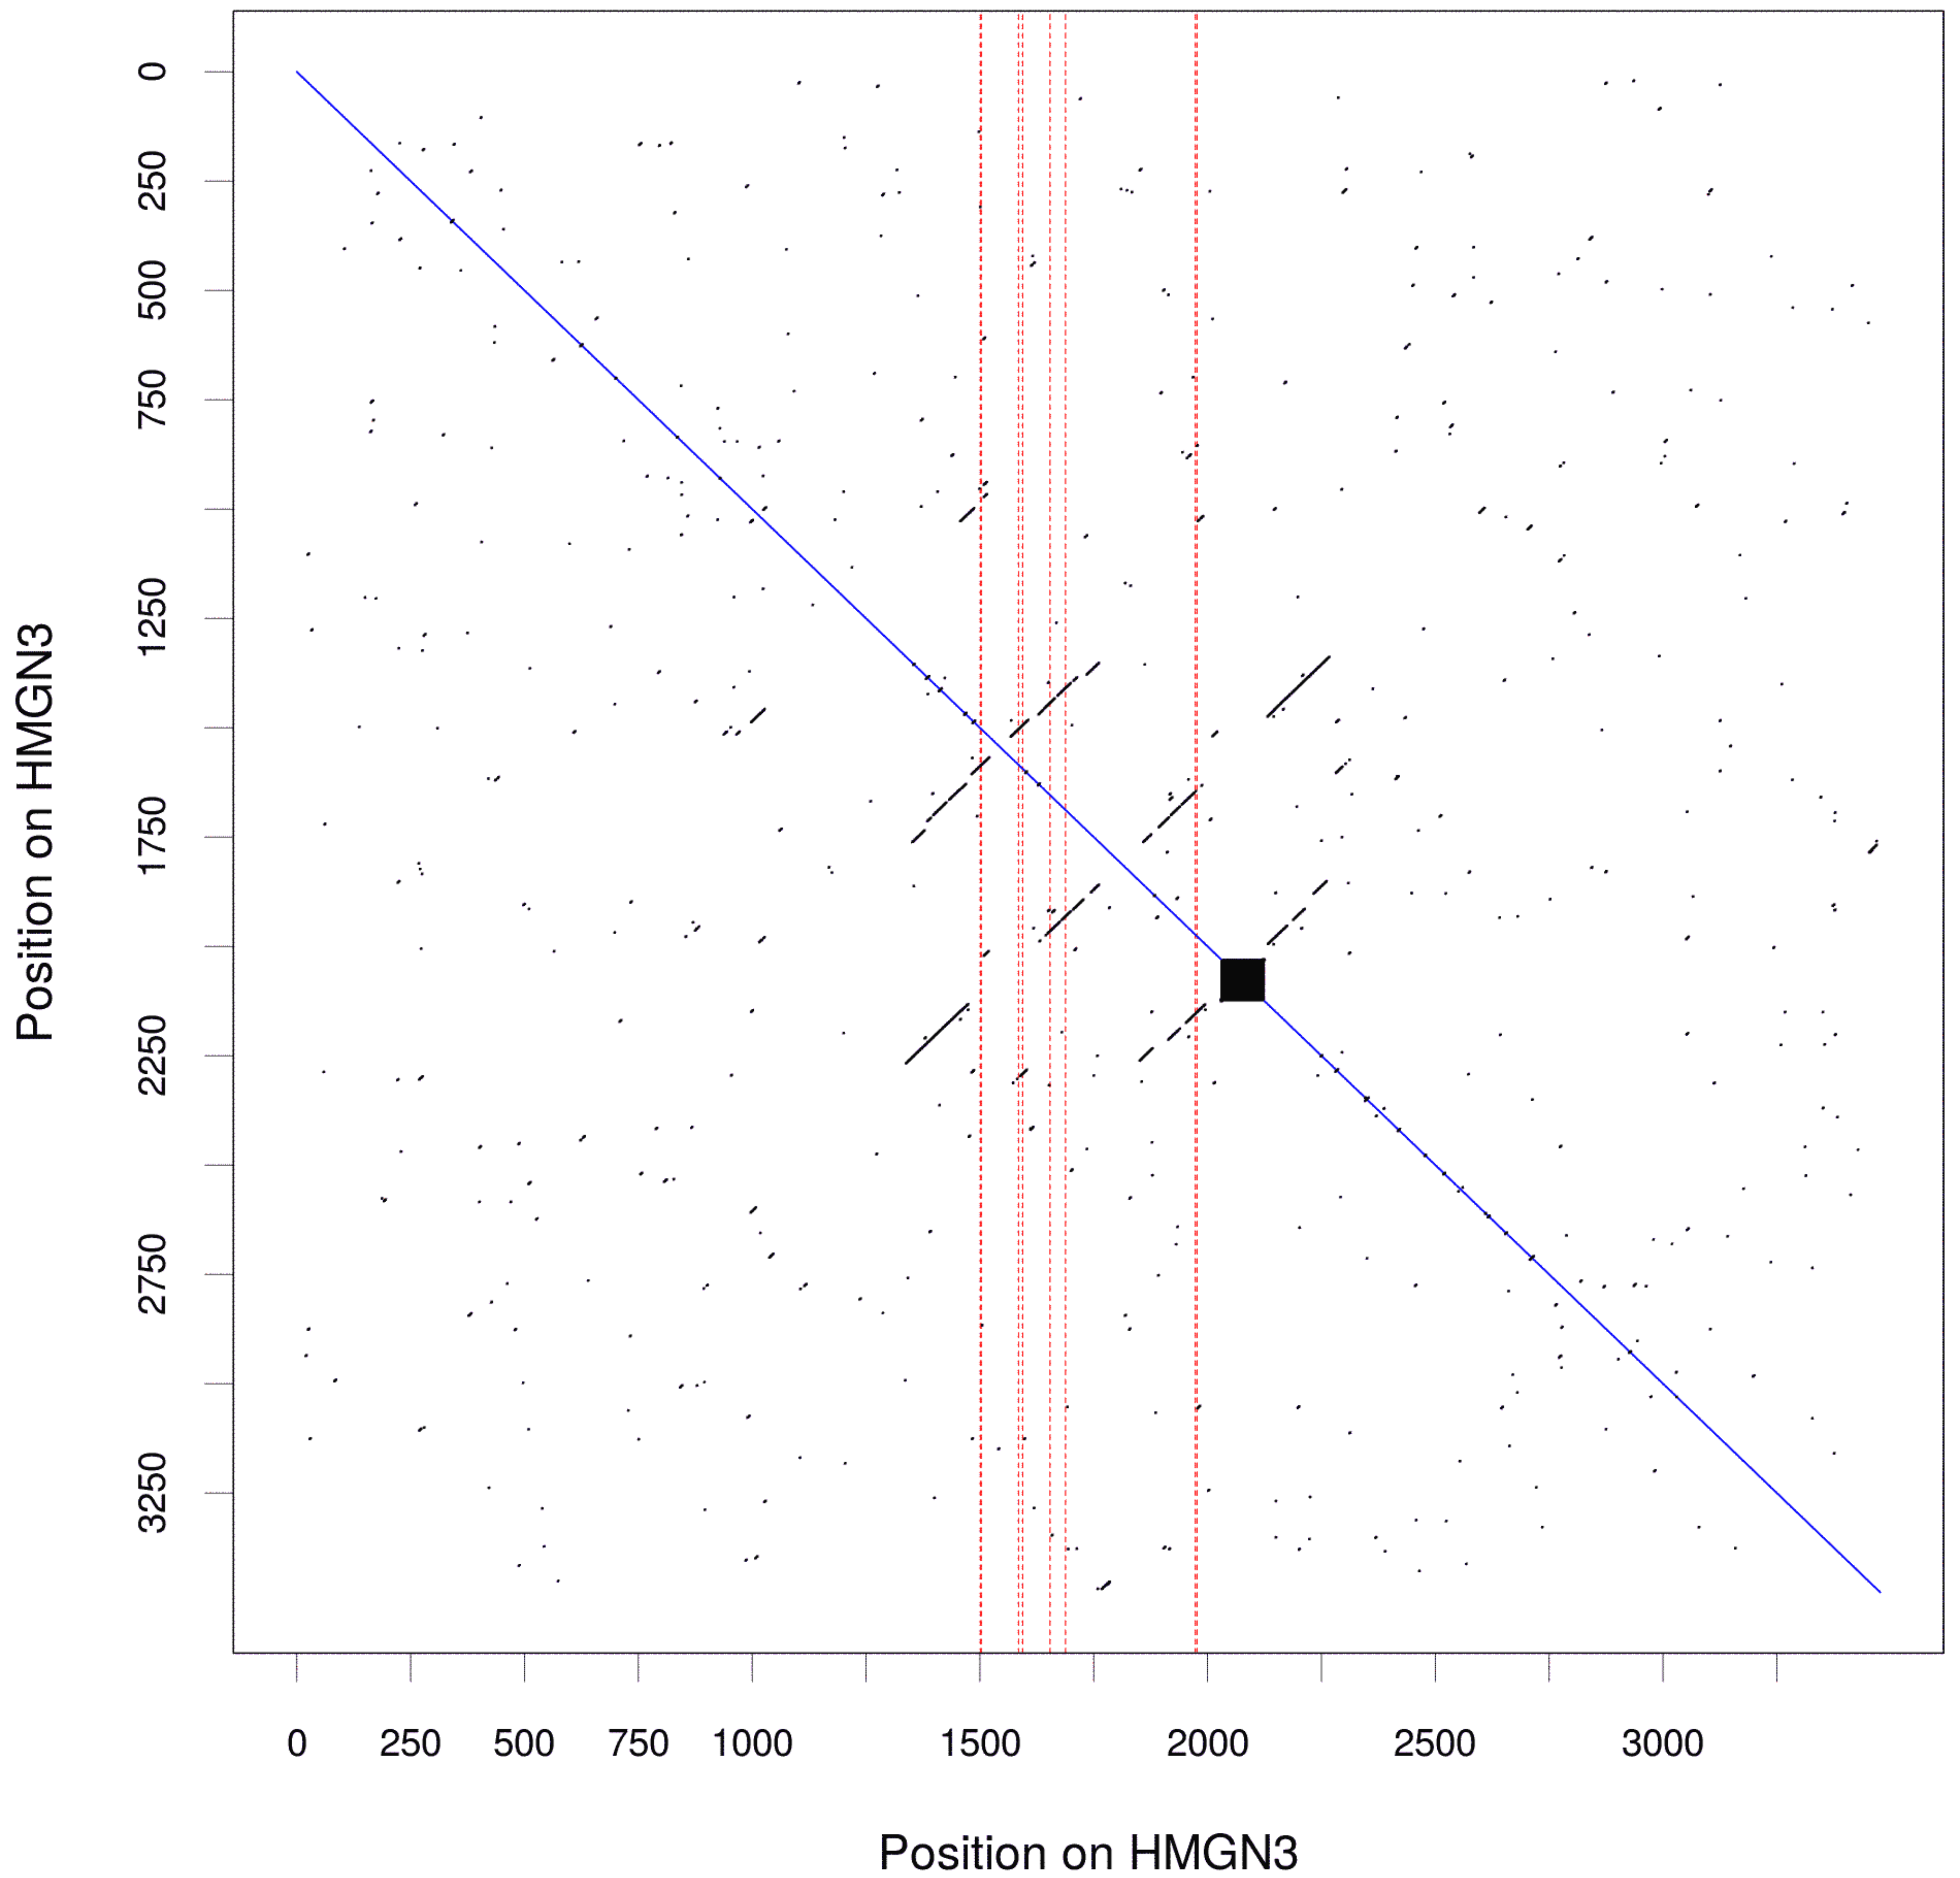

# HOOK3

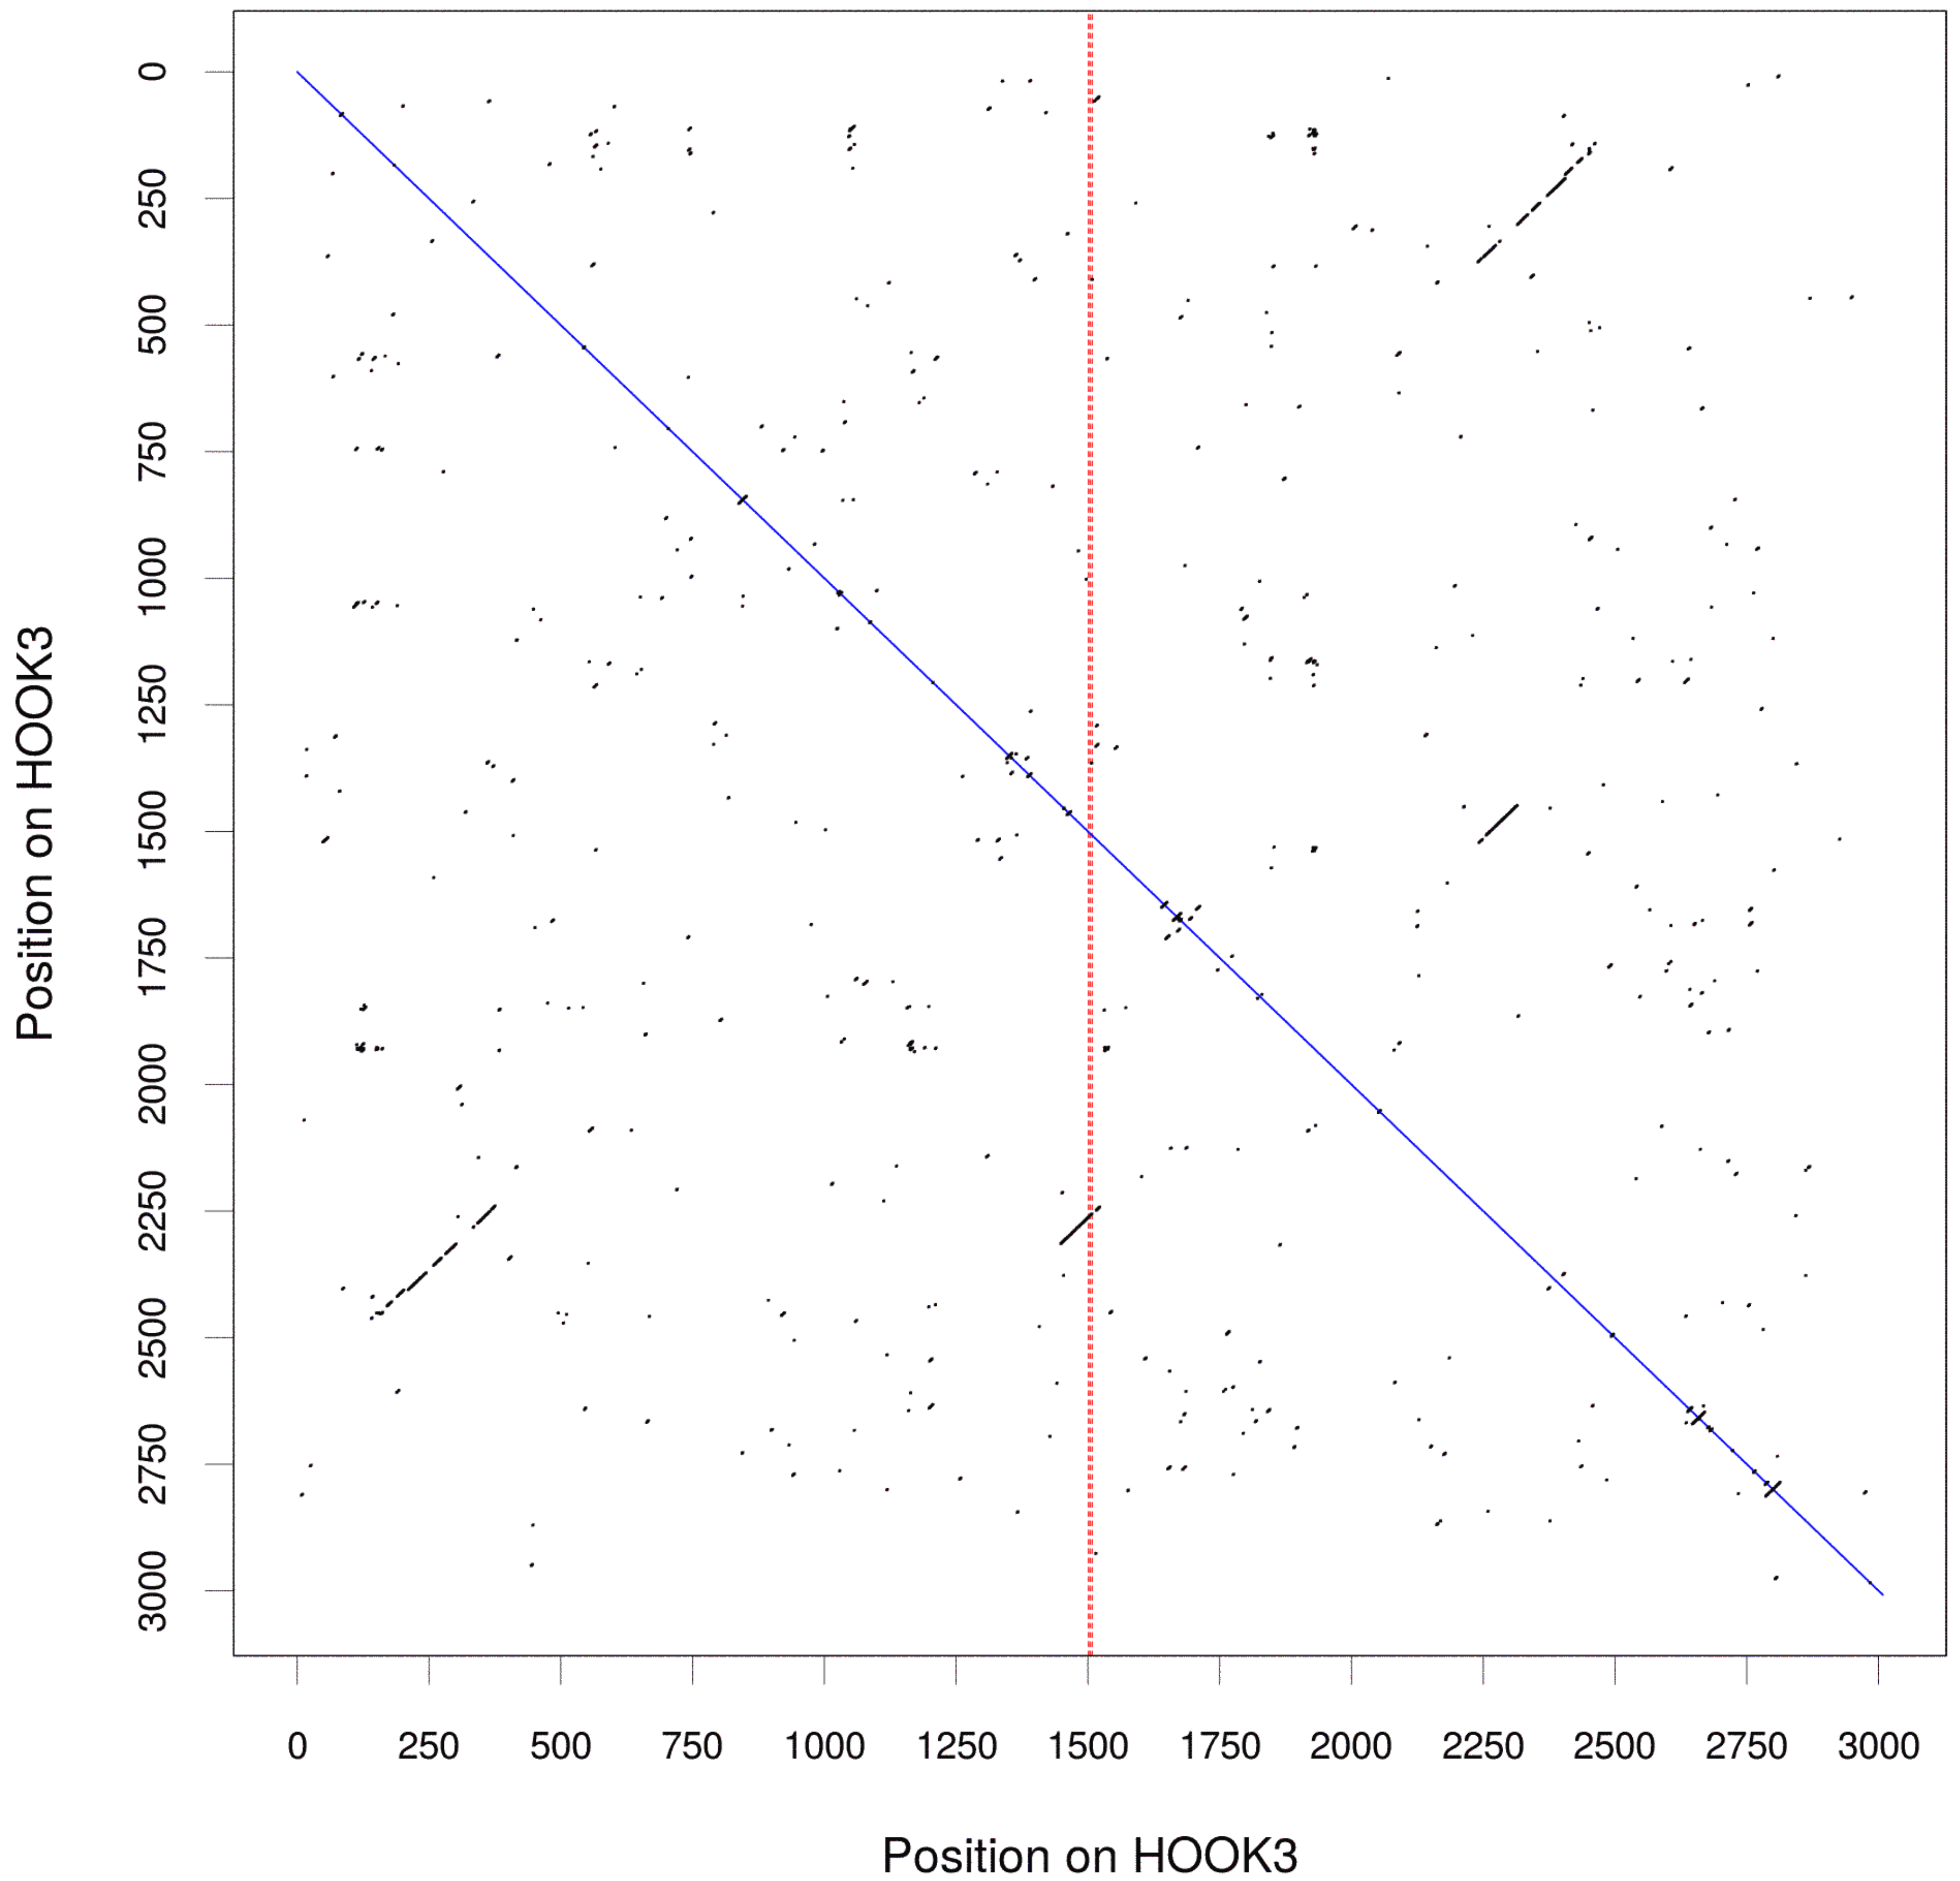

# HPN

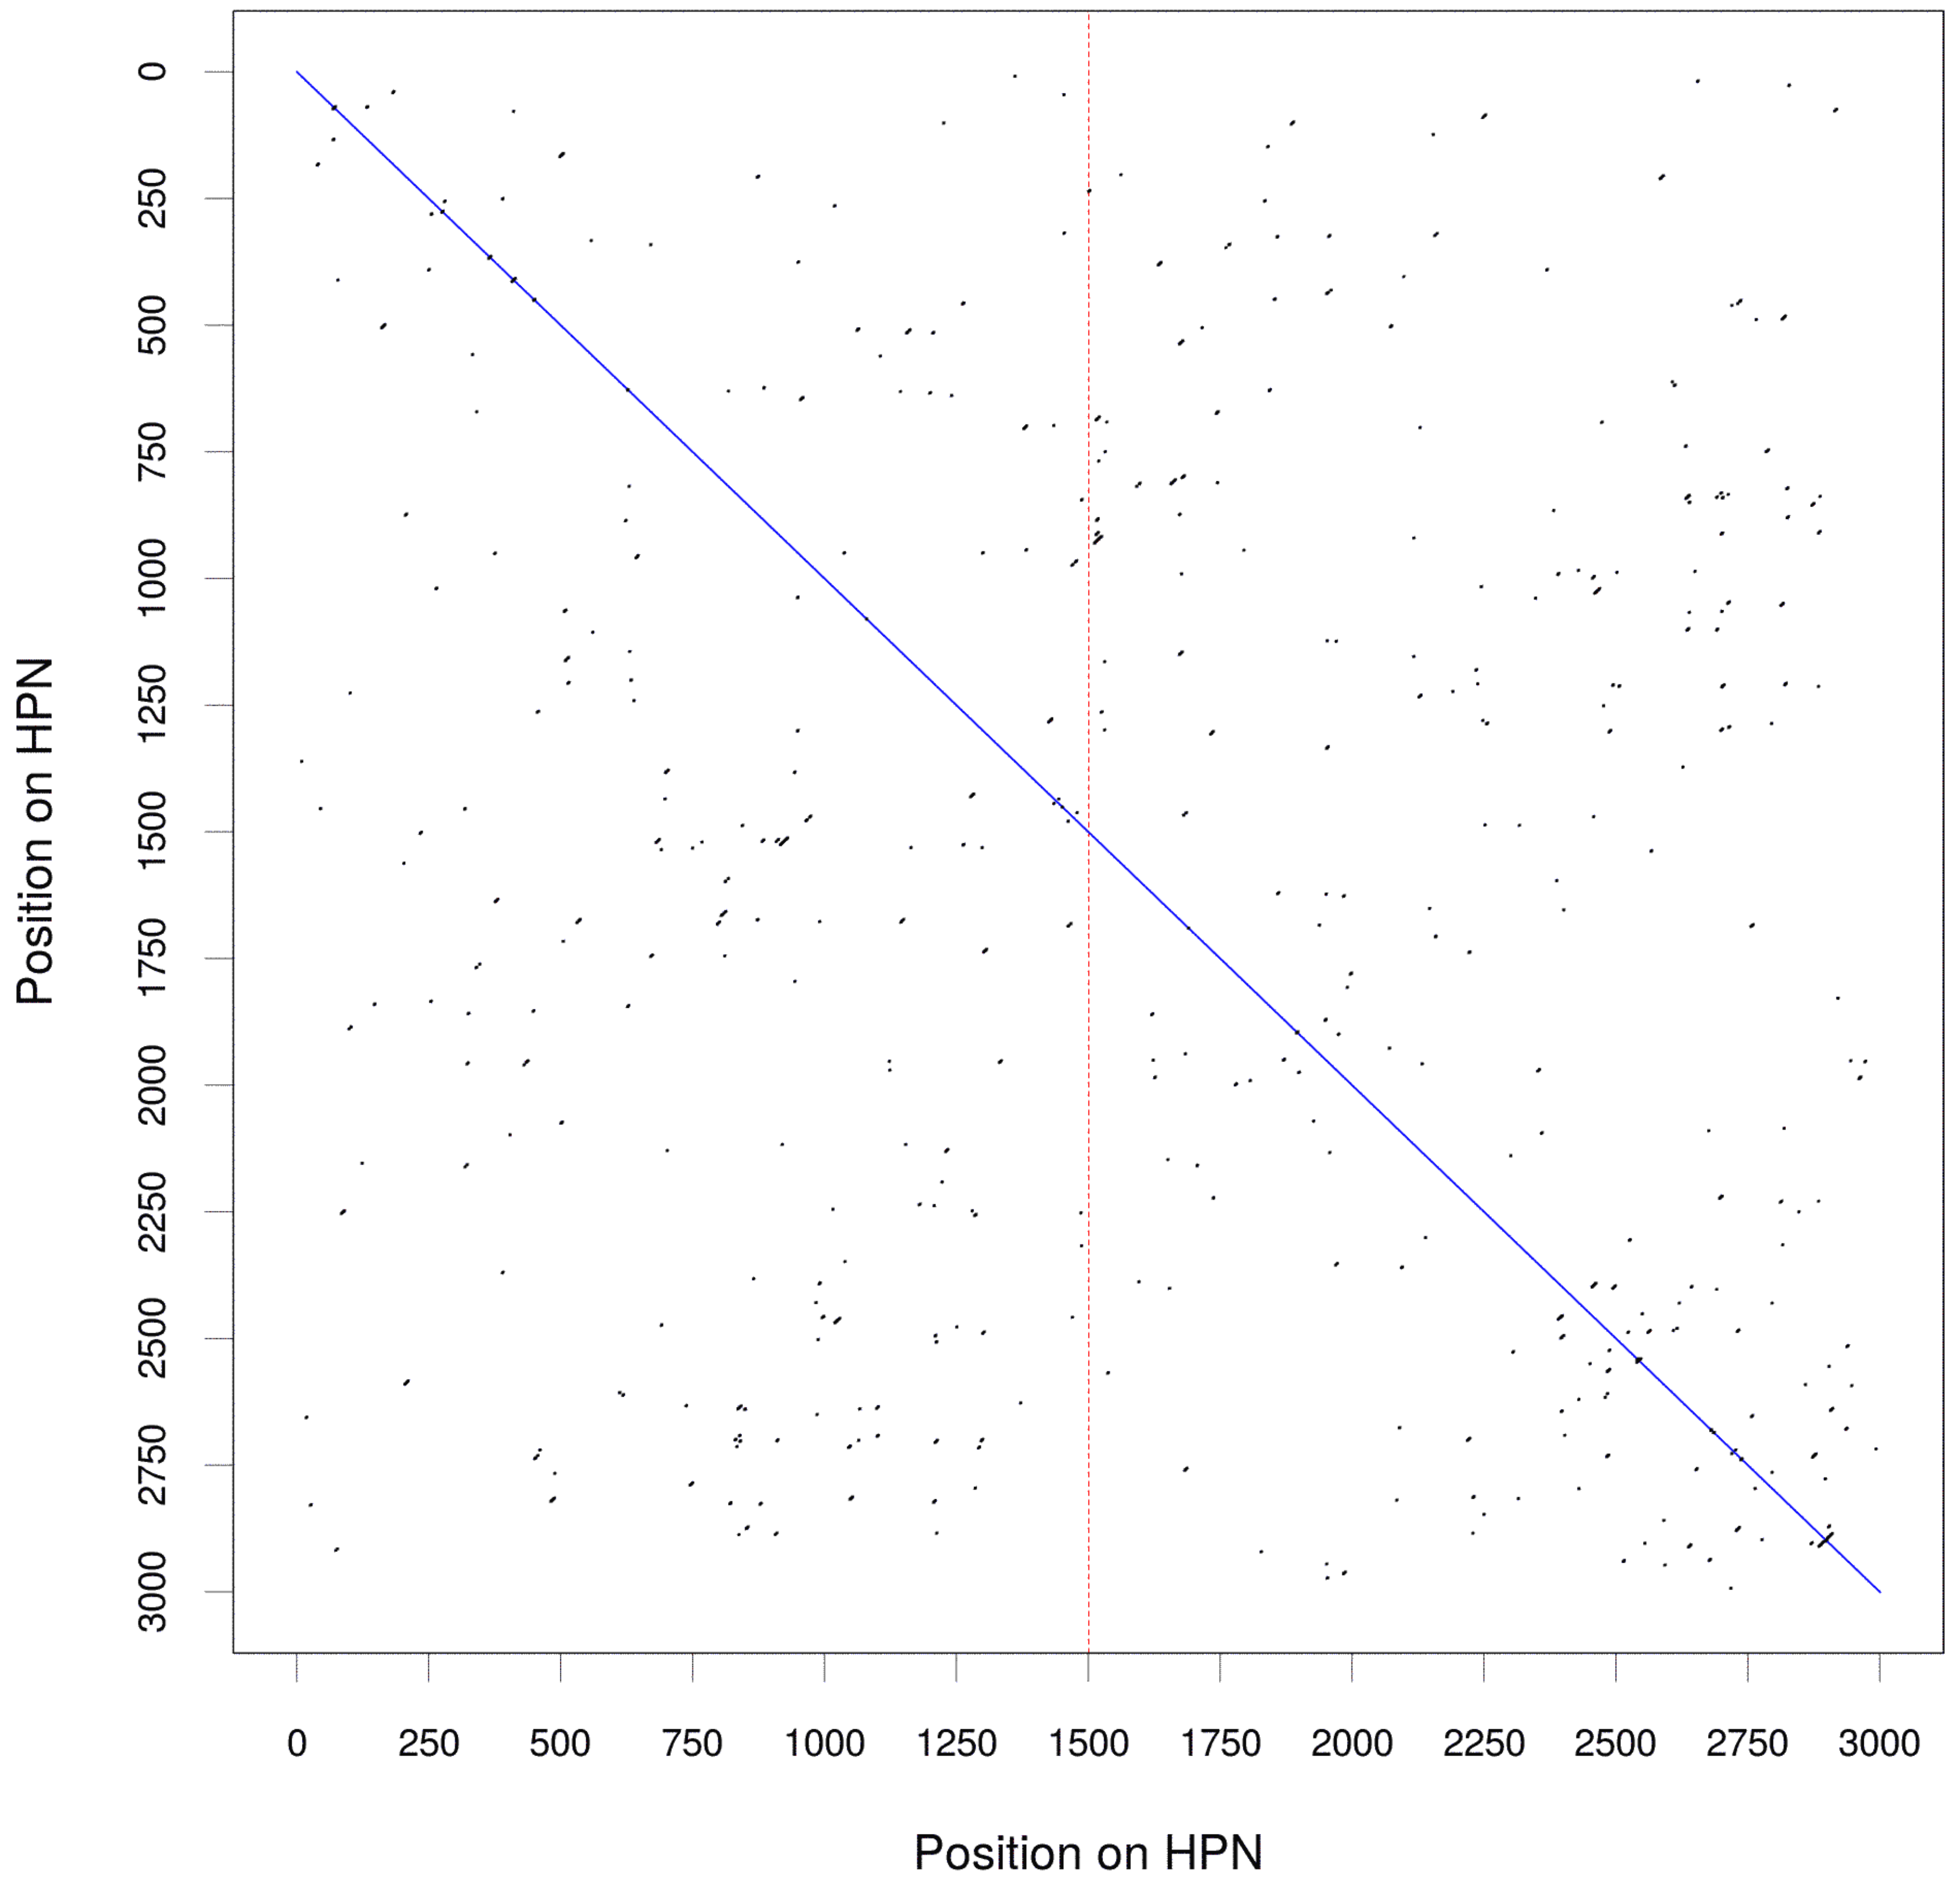

# HPSE

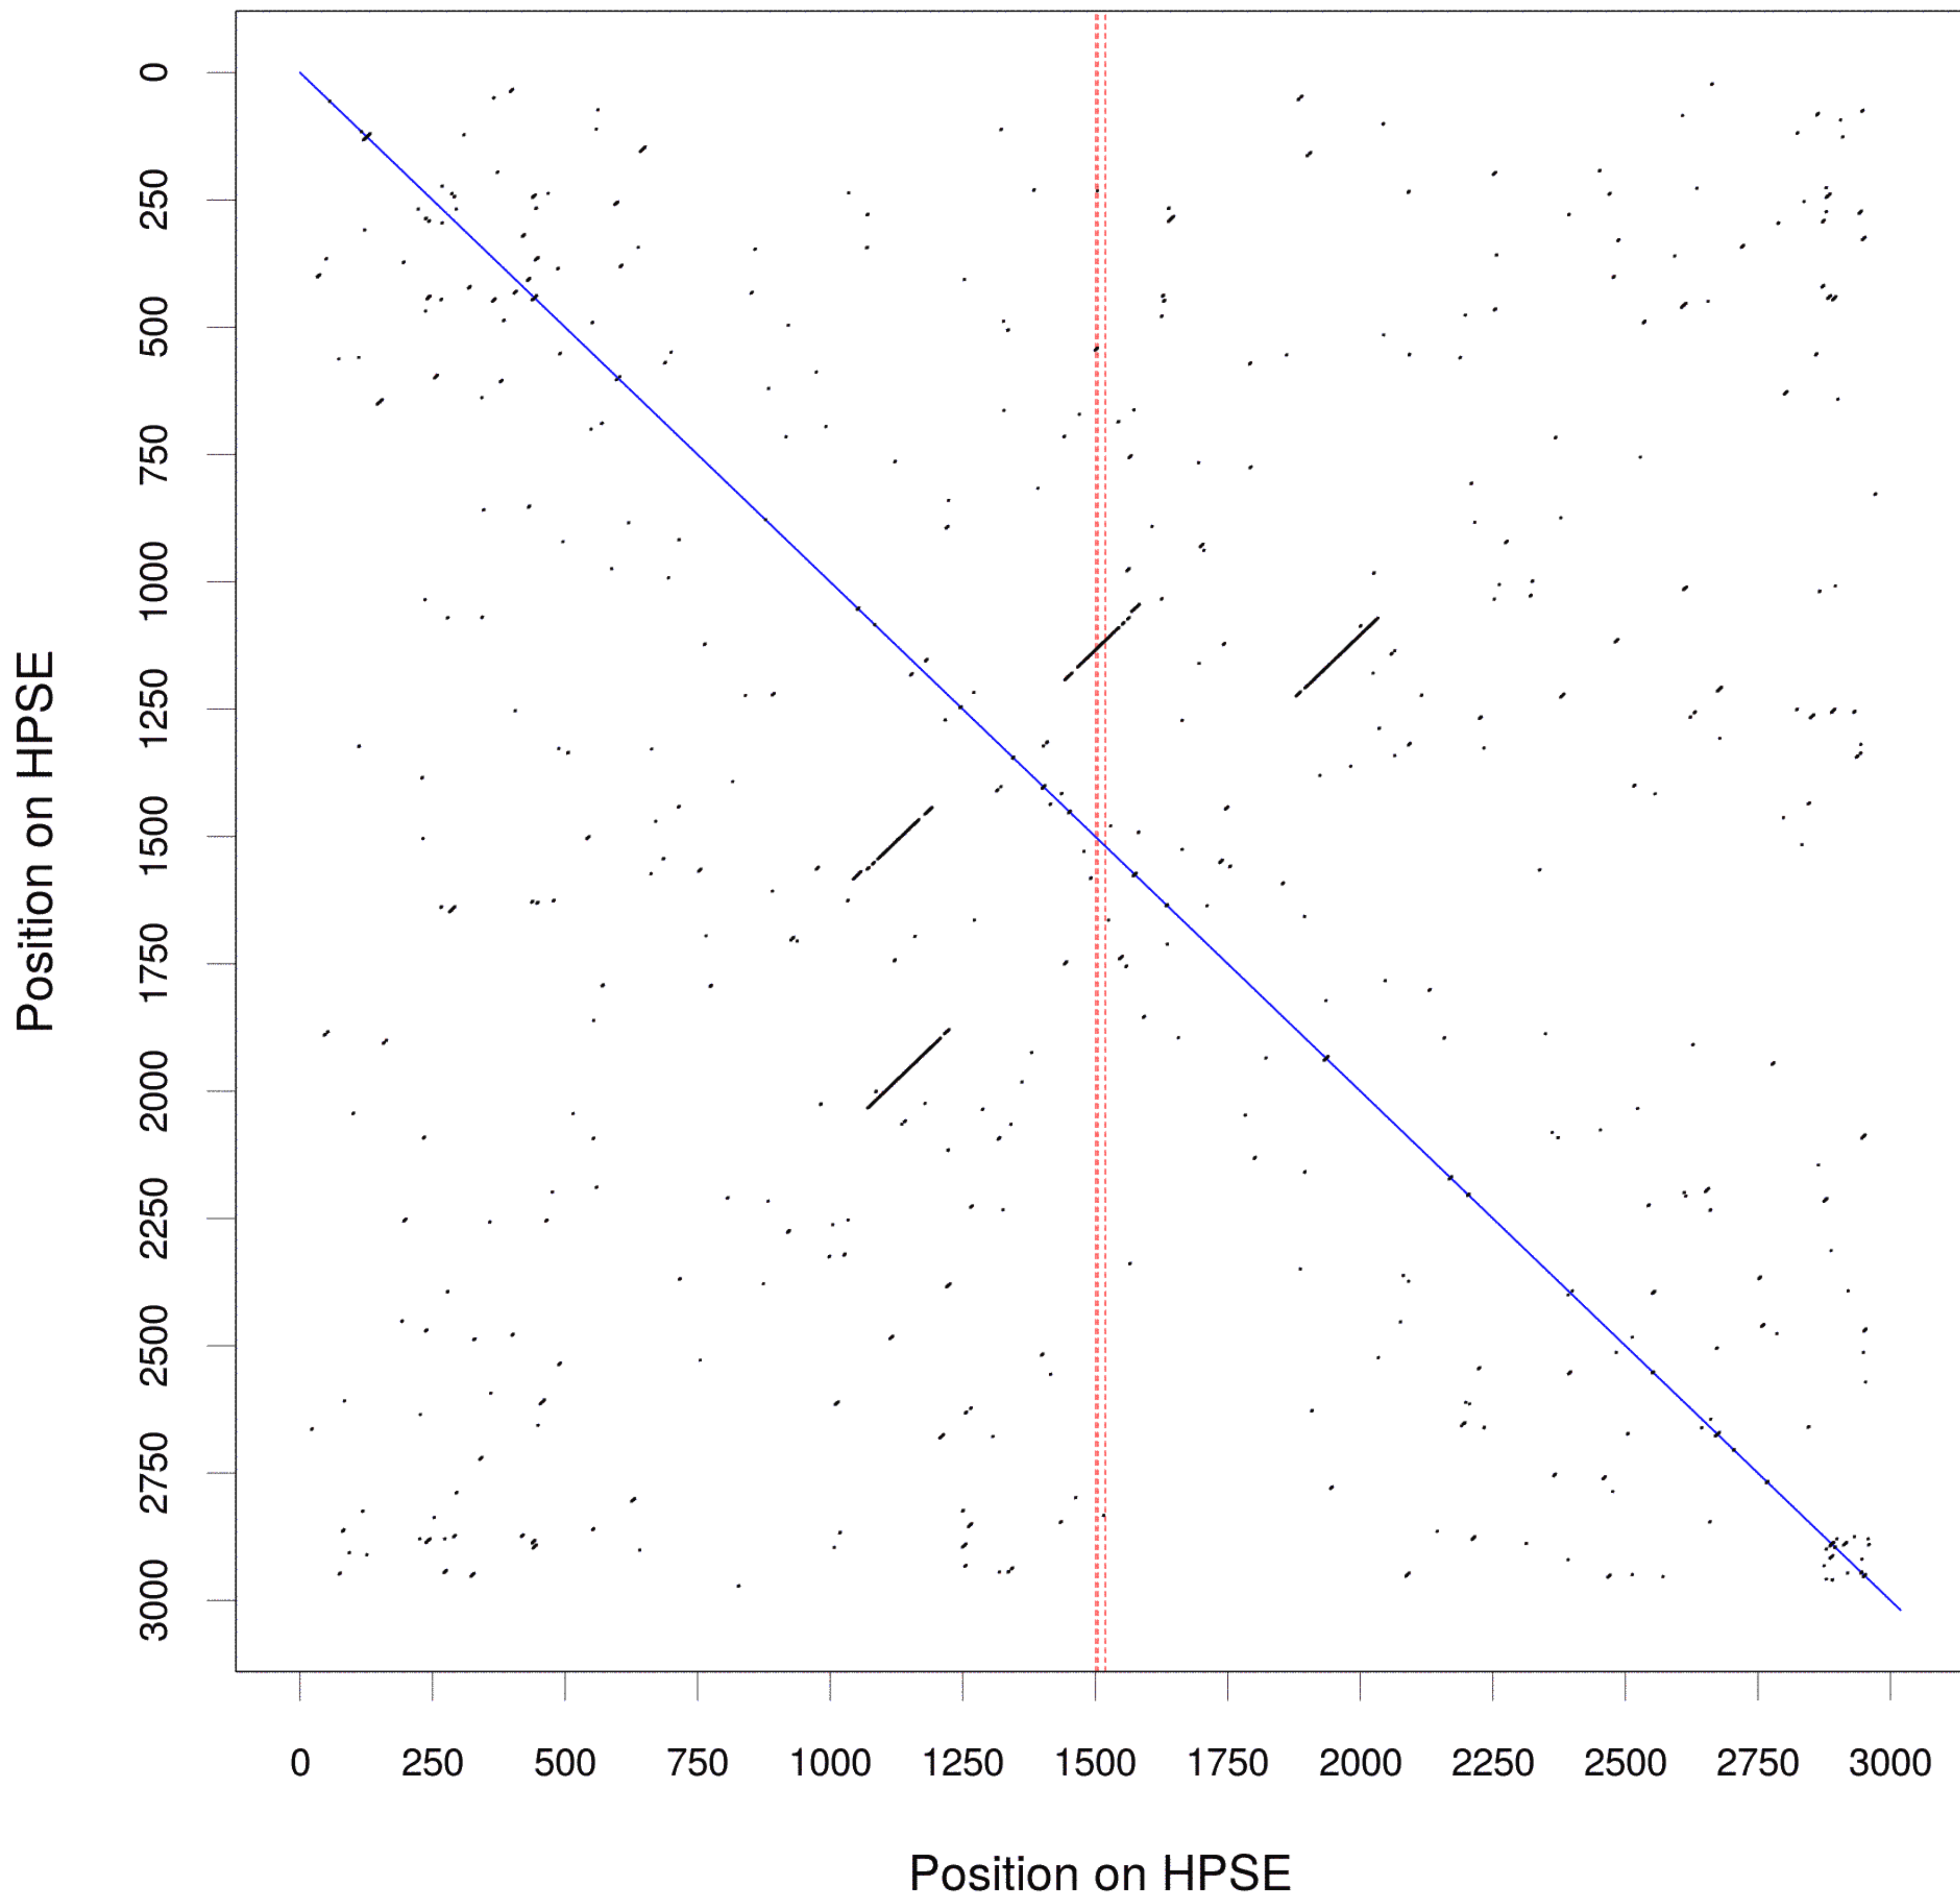



# HSTN

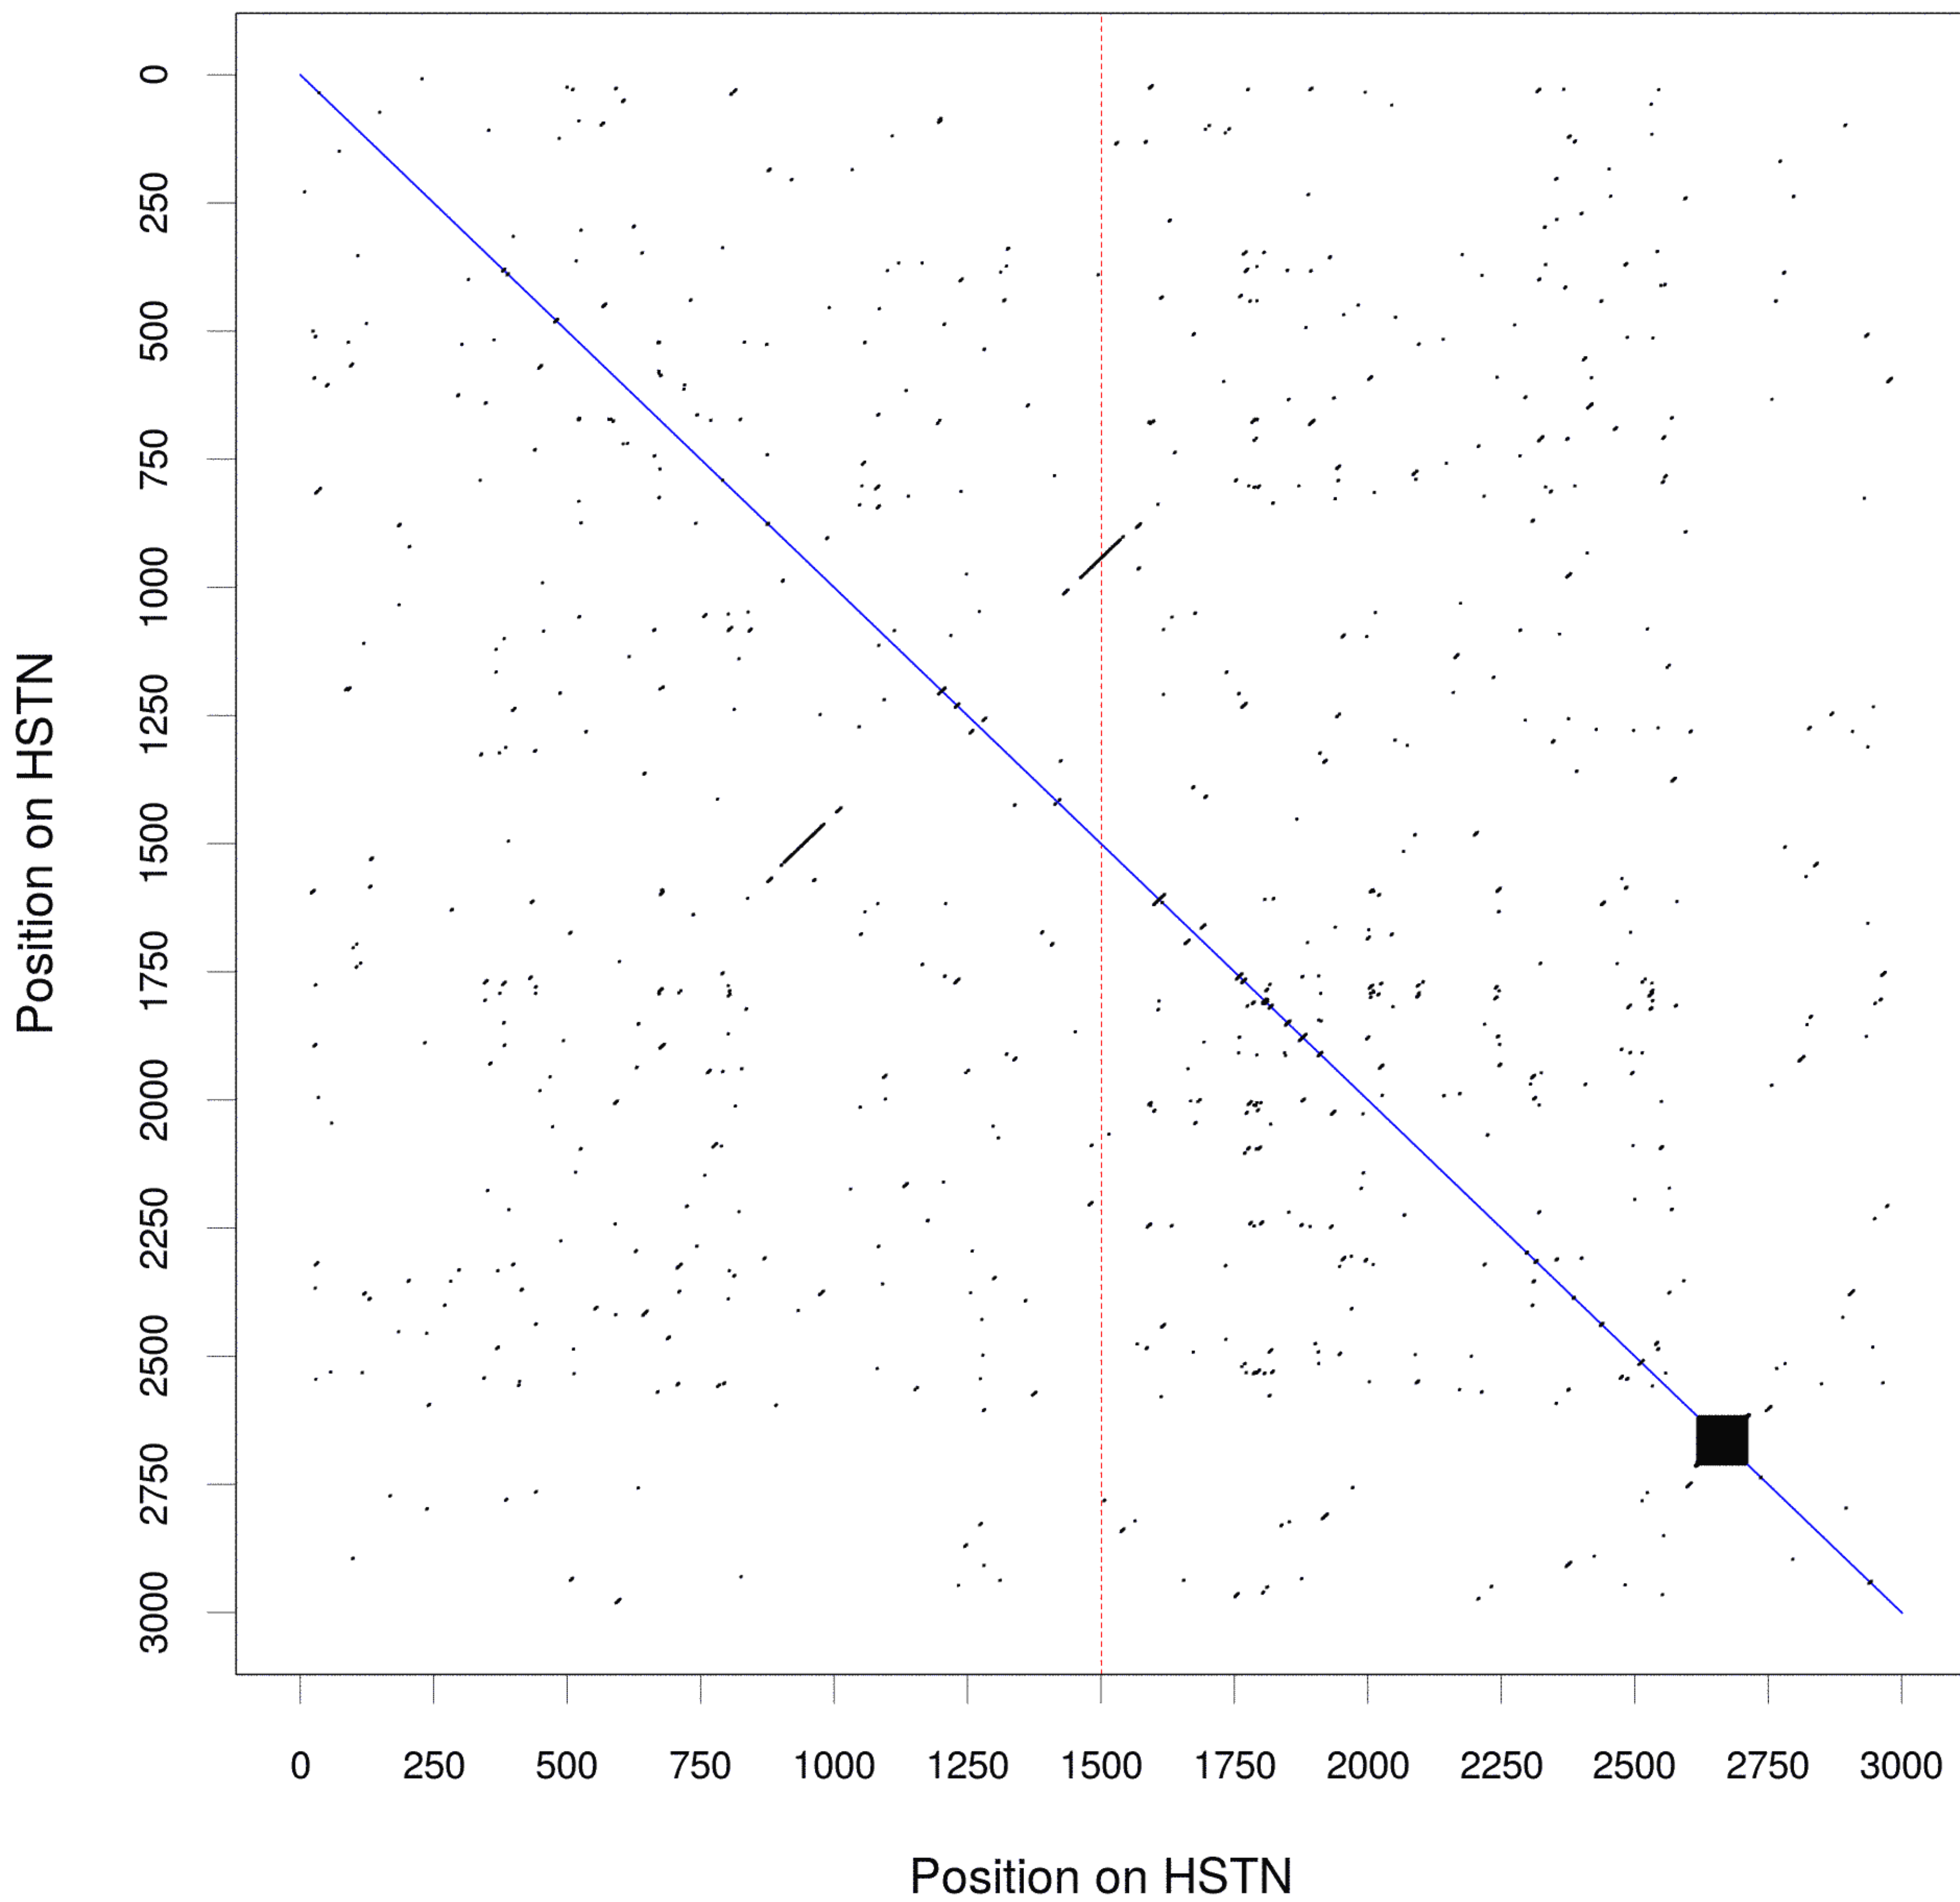

# HTATIP2

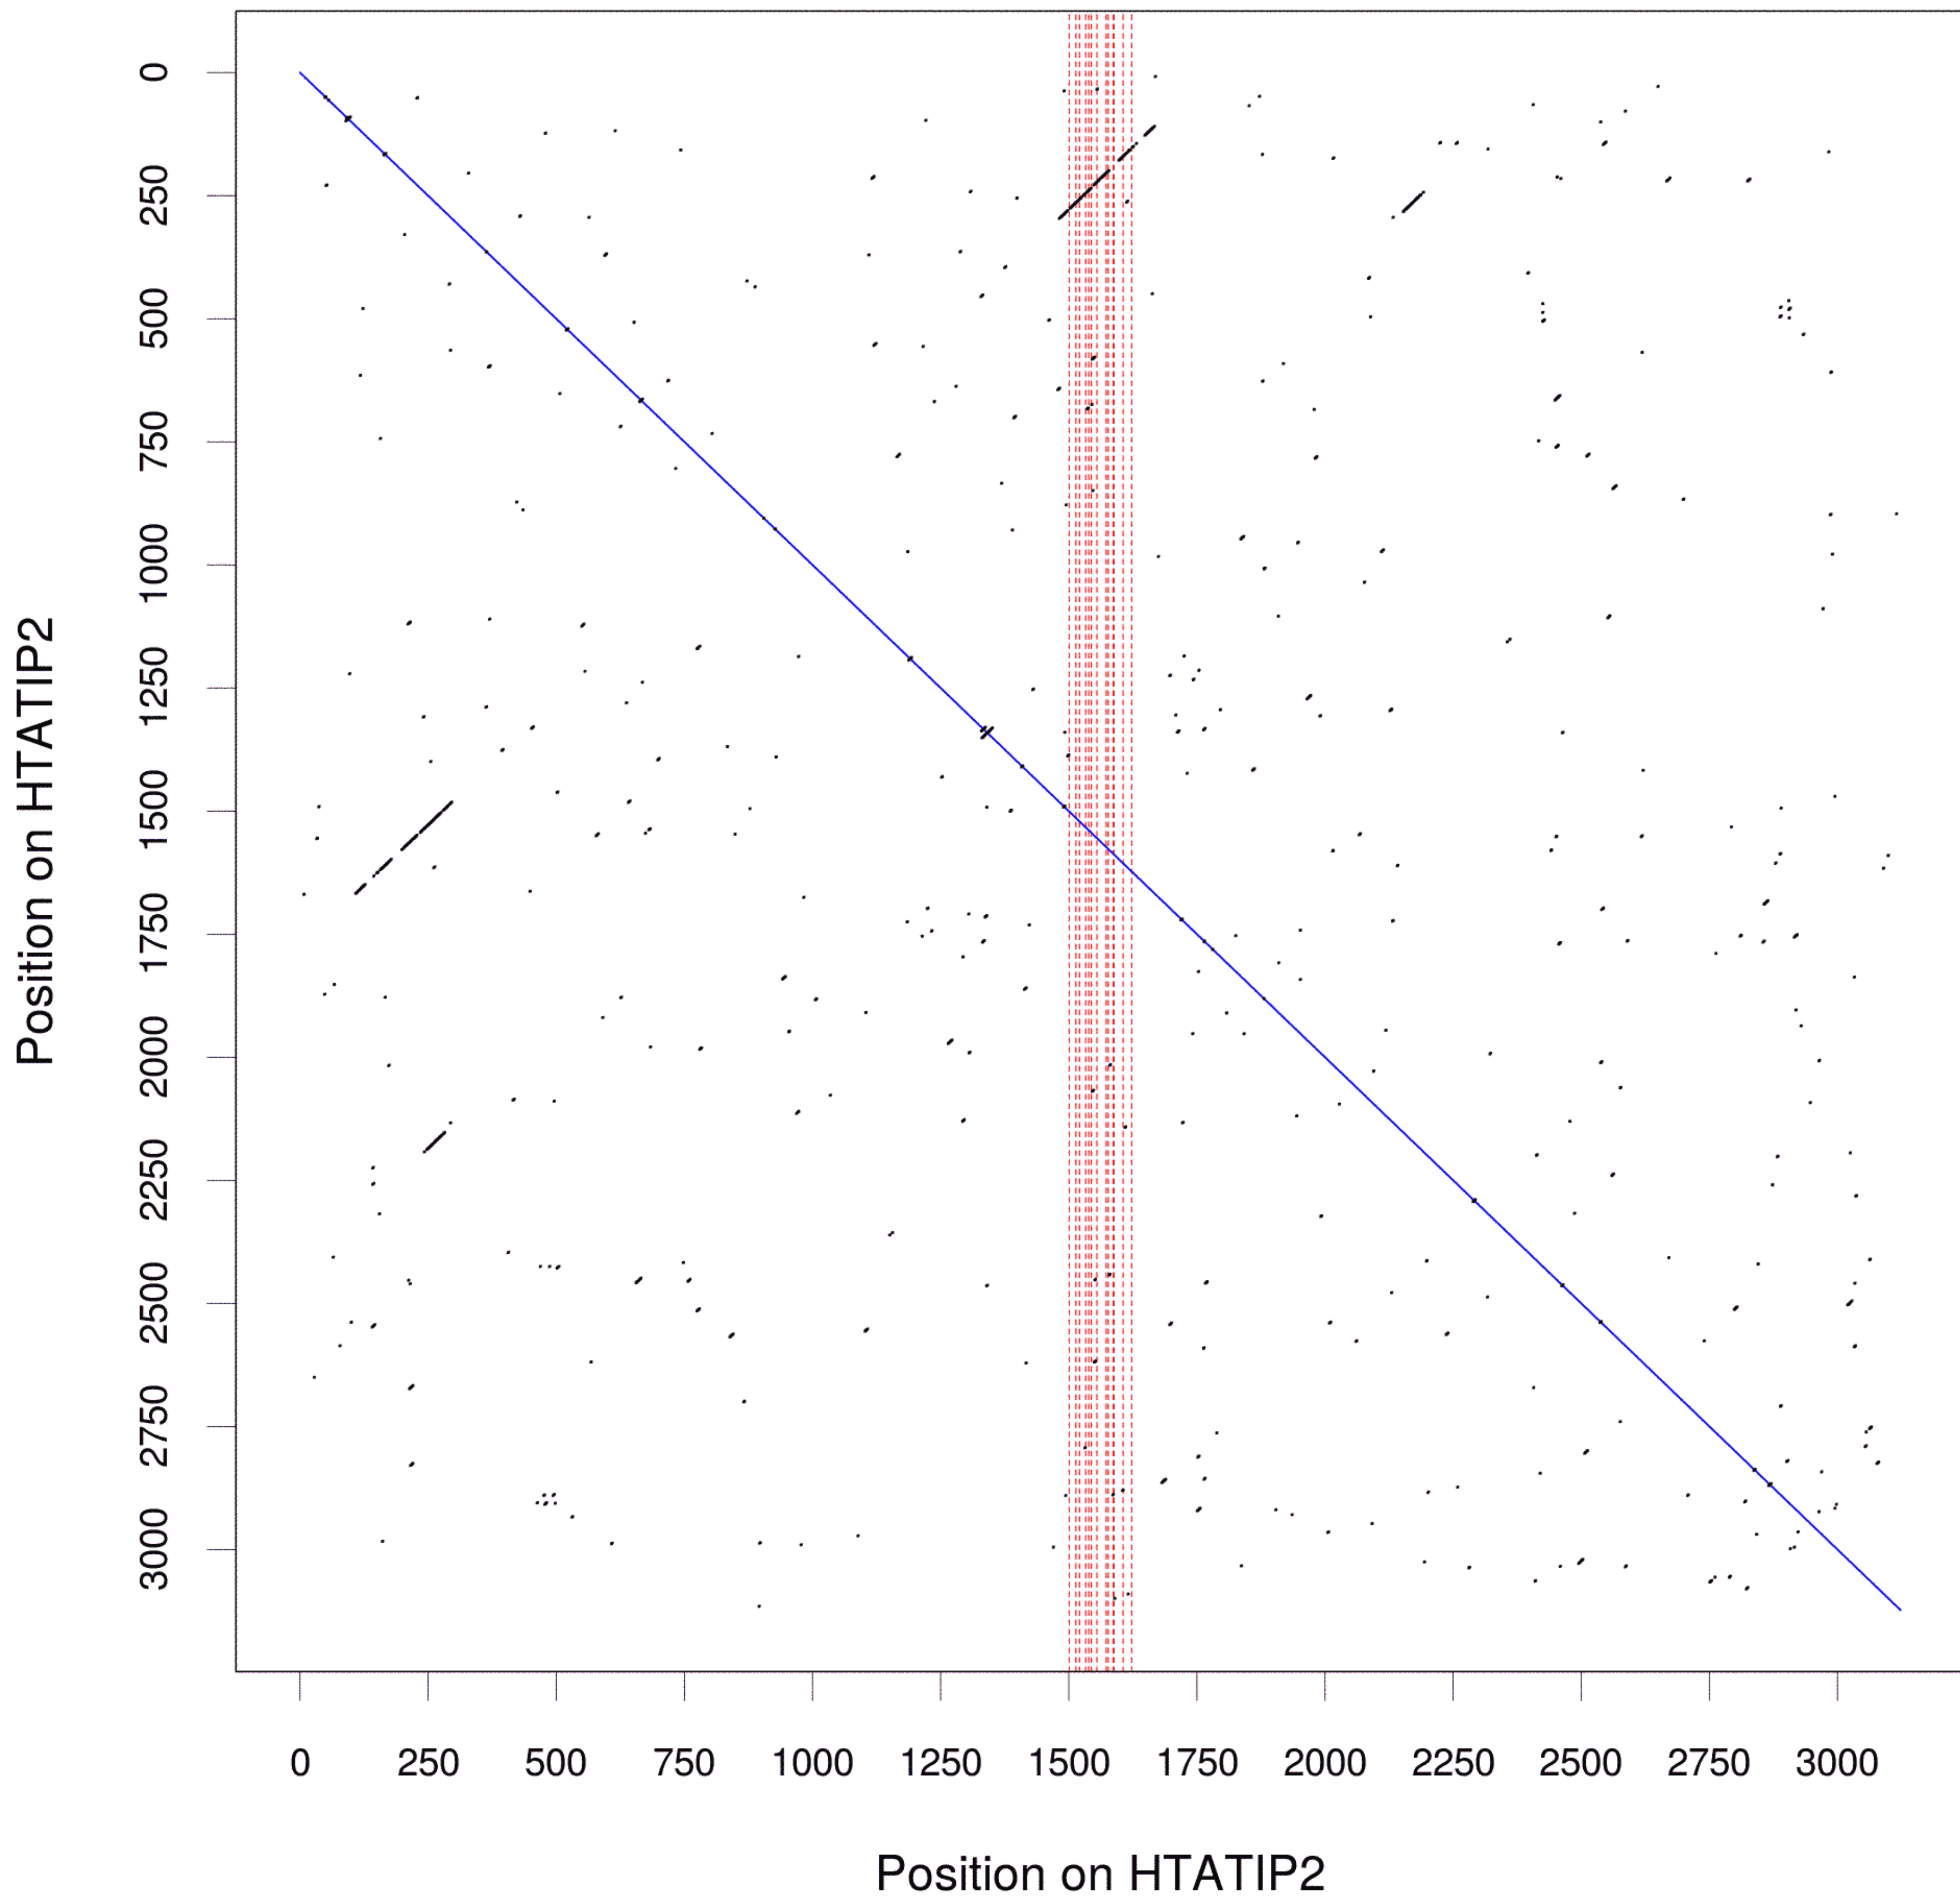

# IAH1

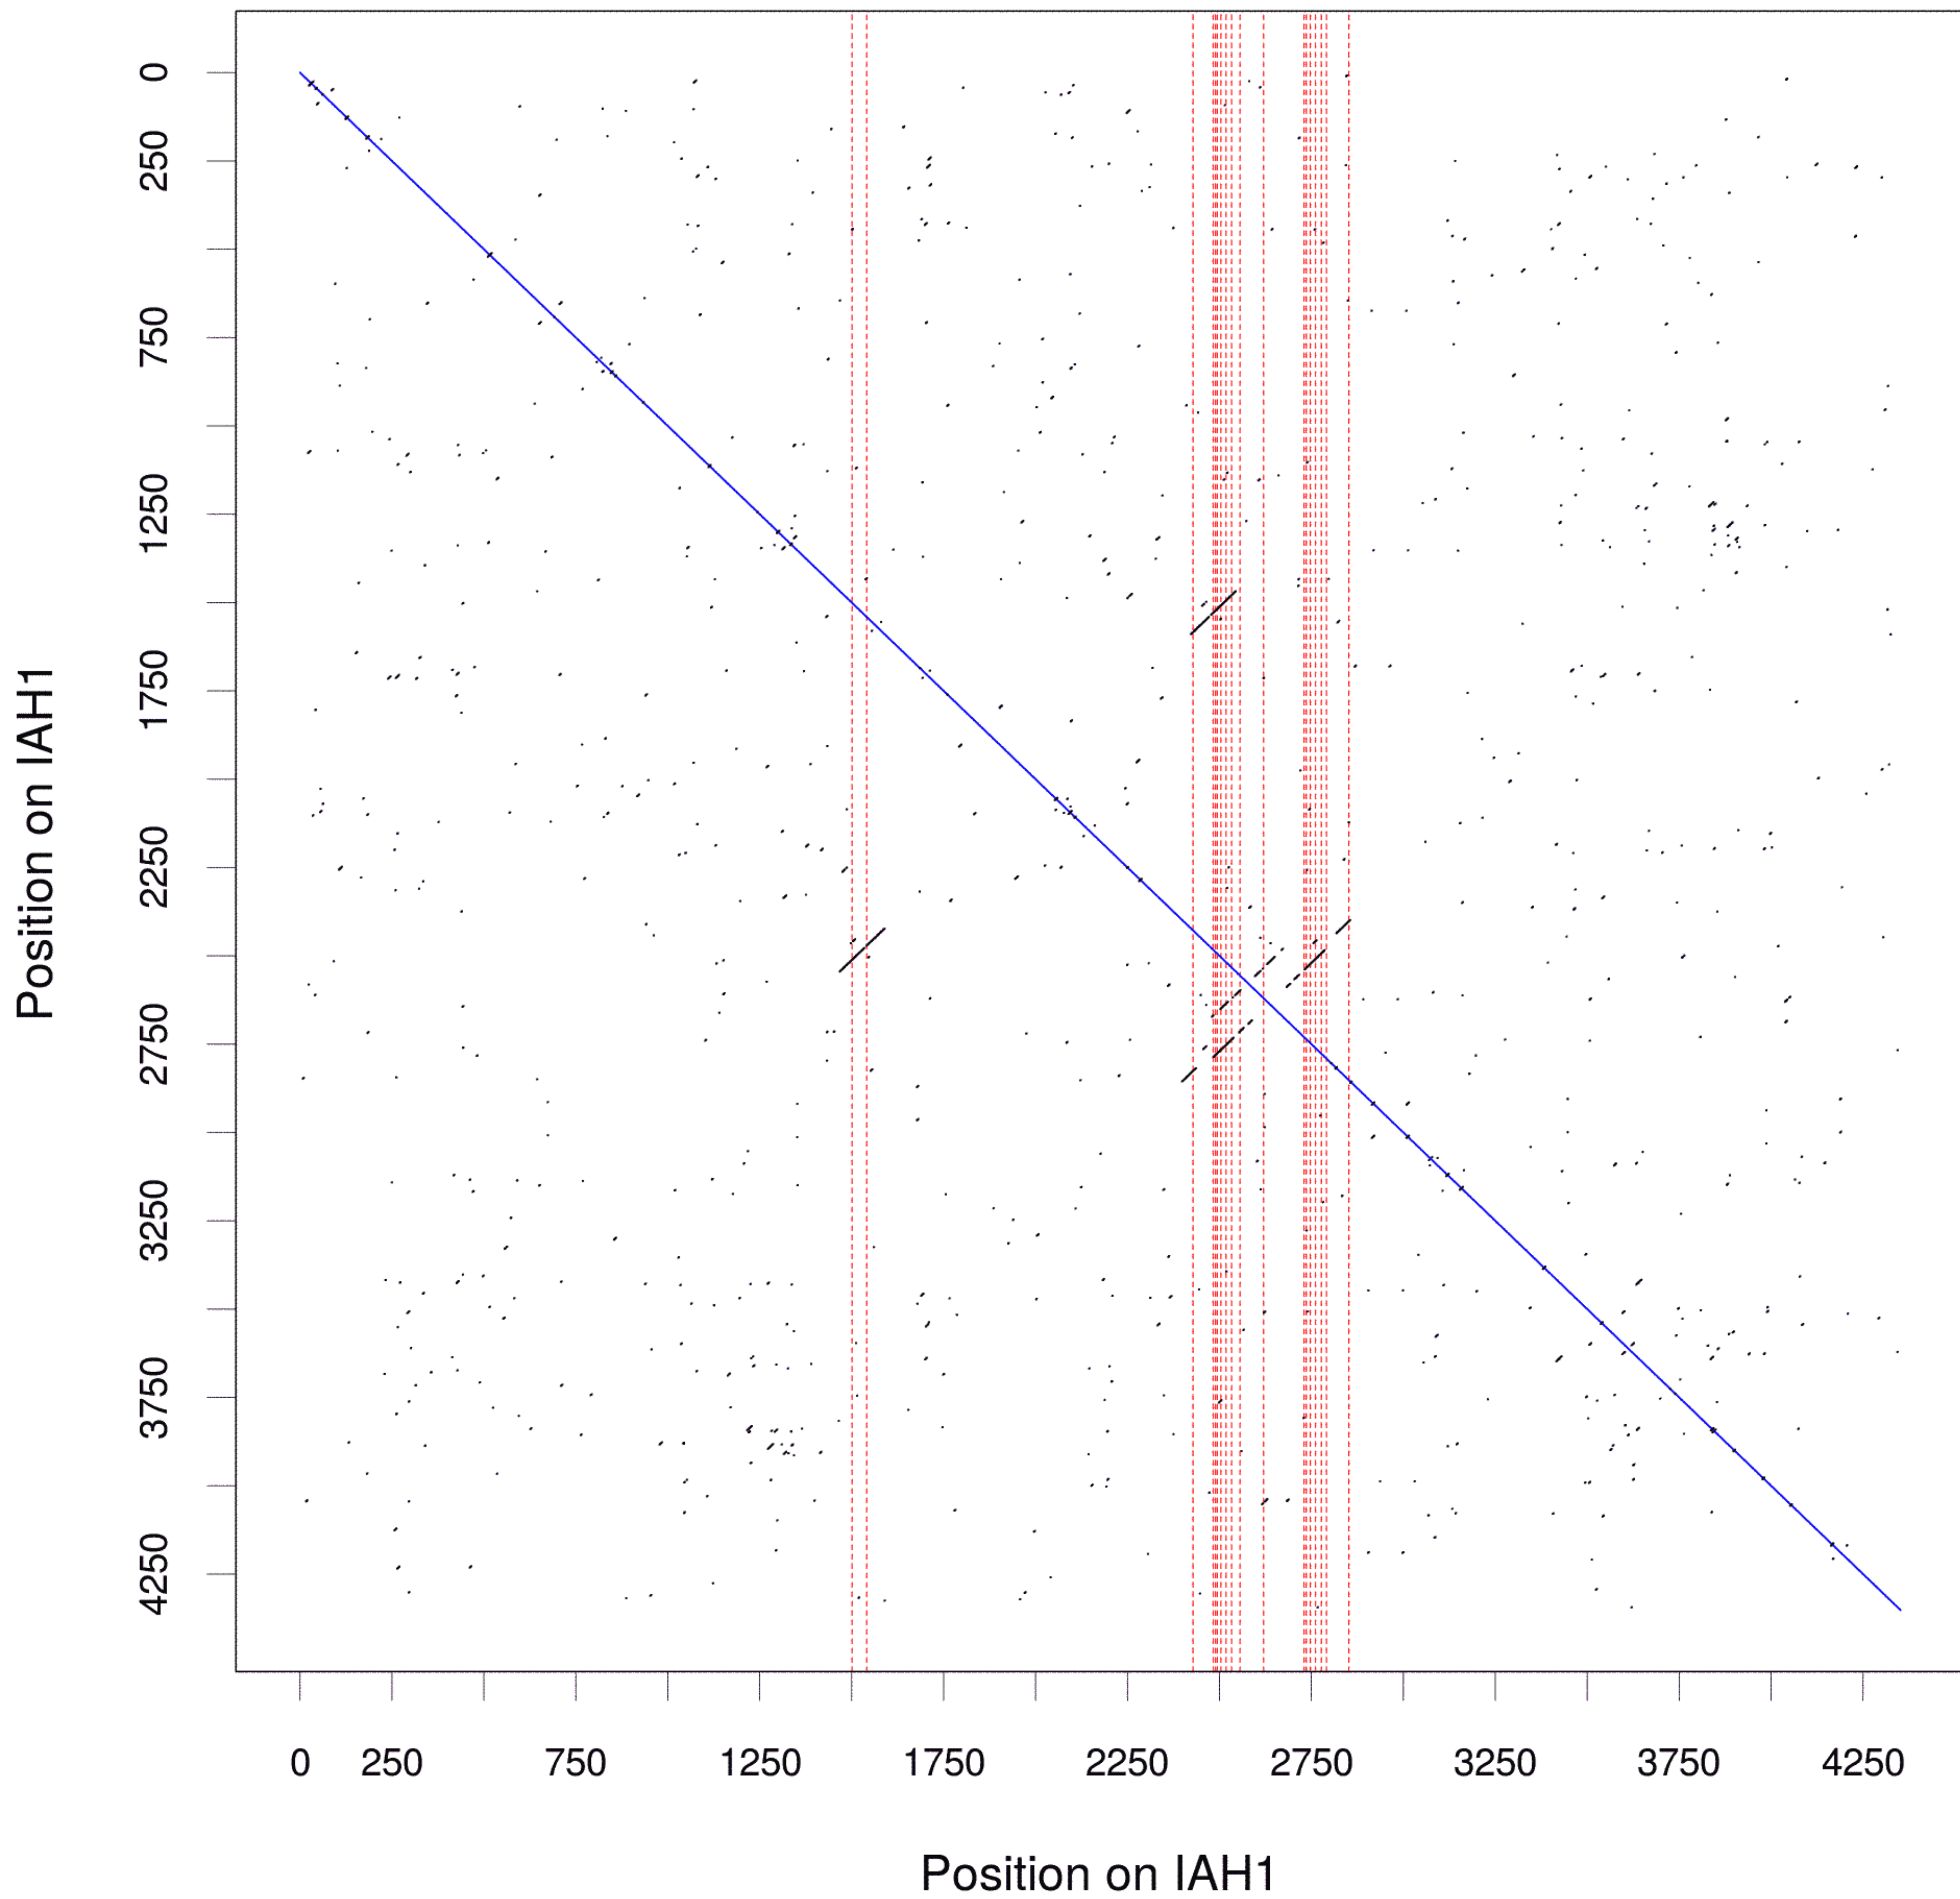

# ICAM1

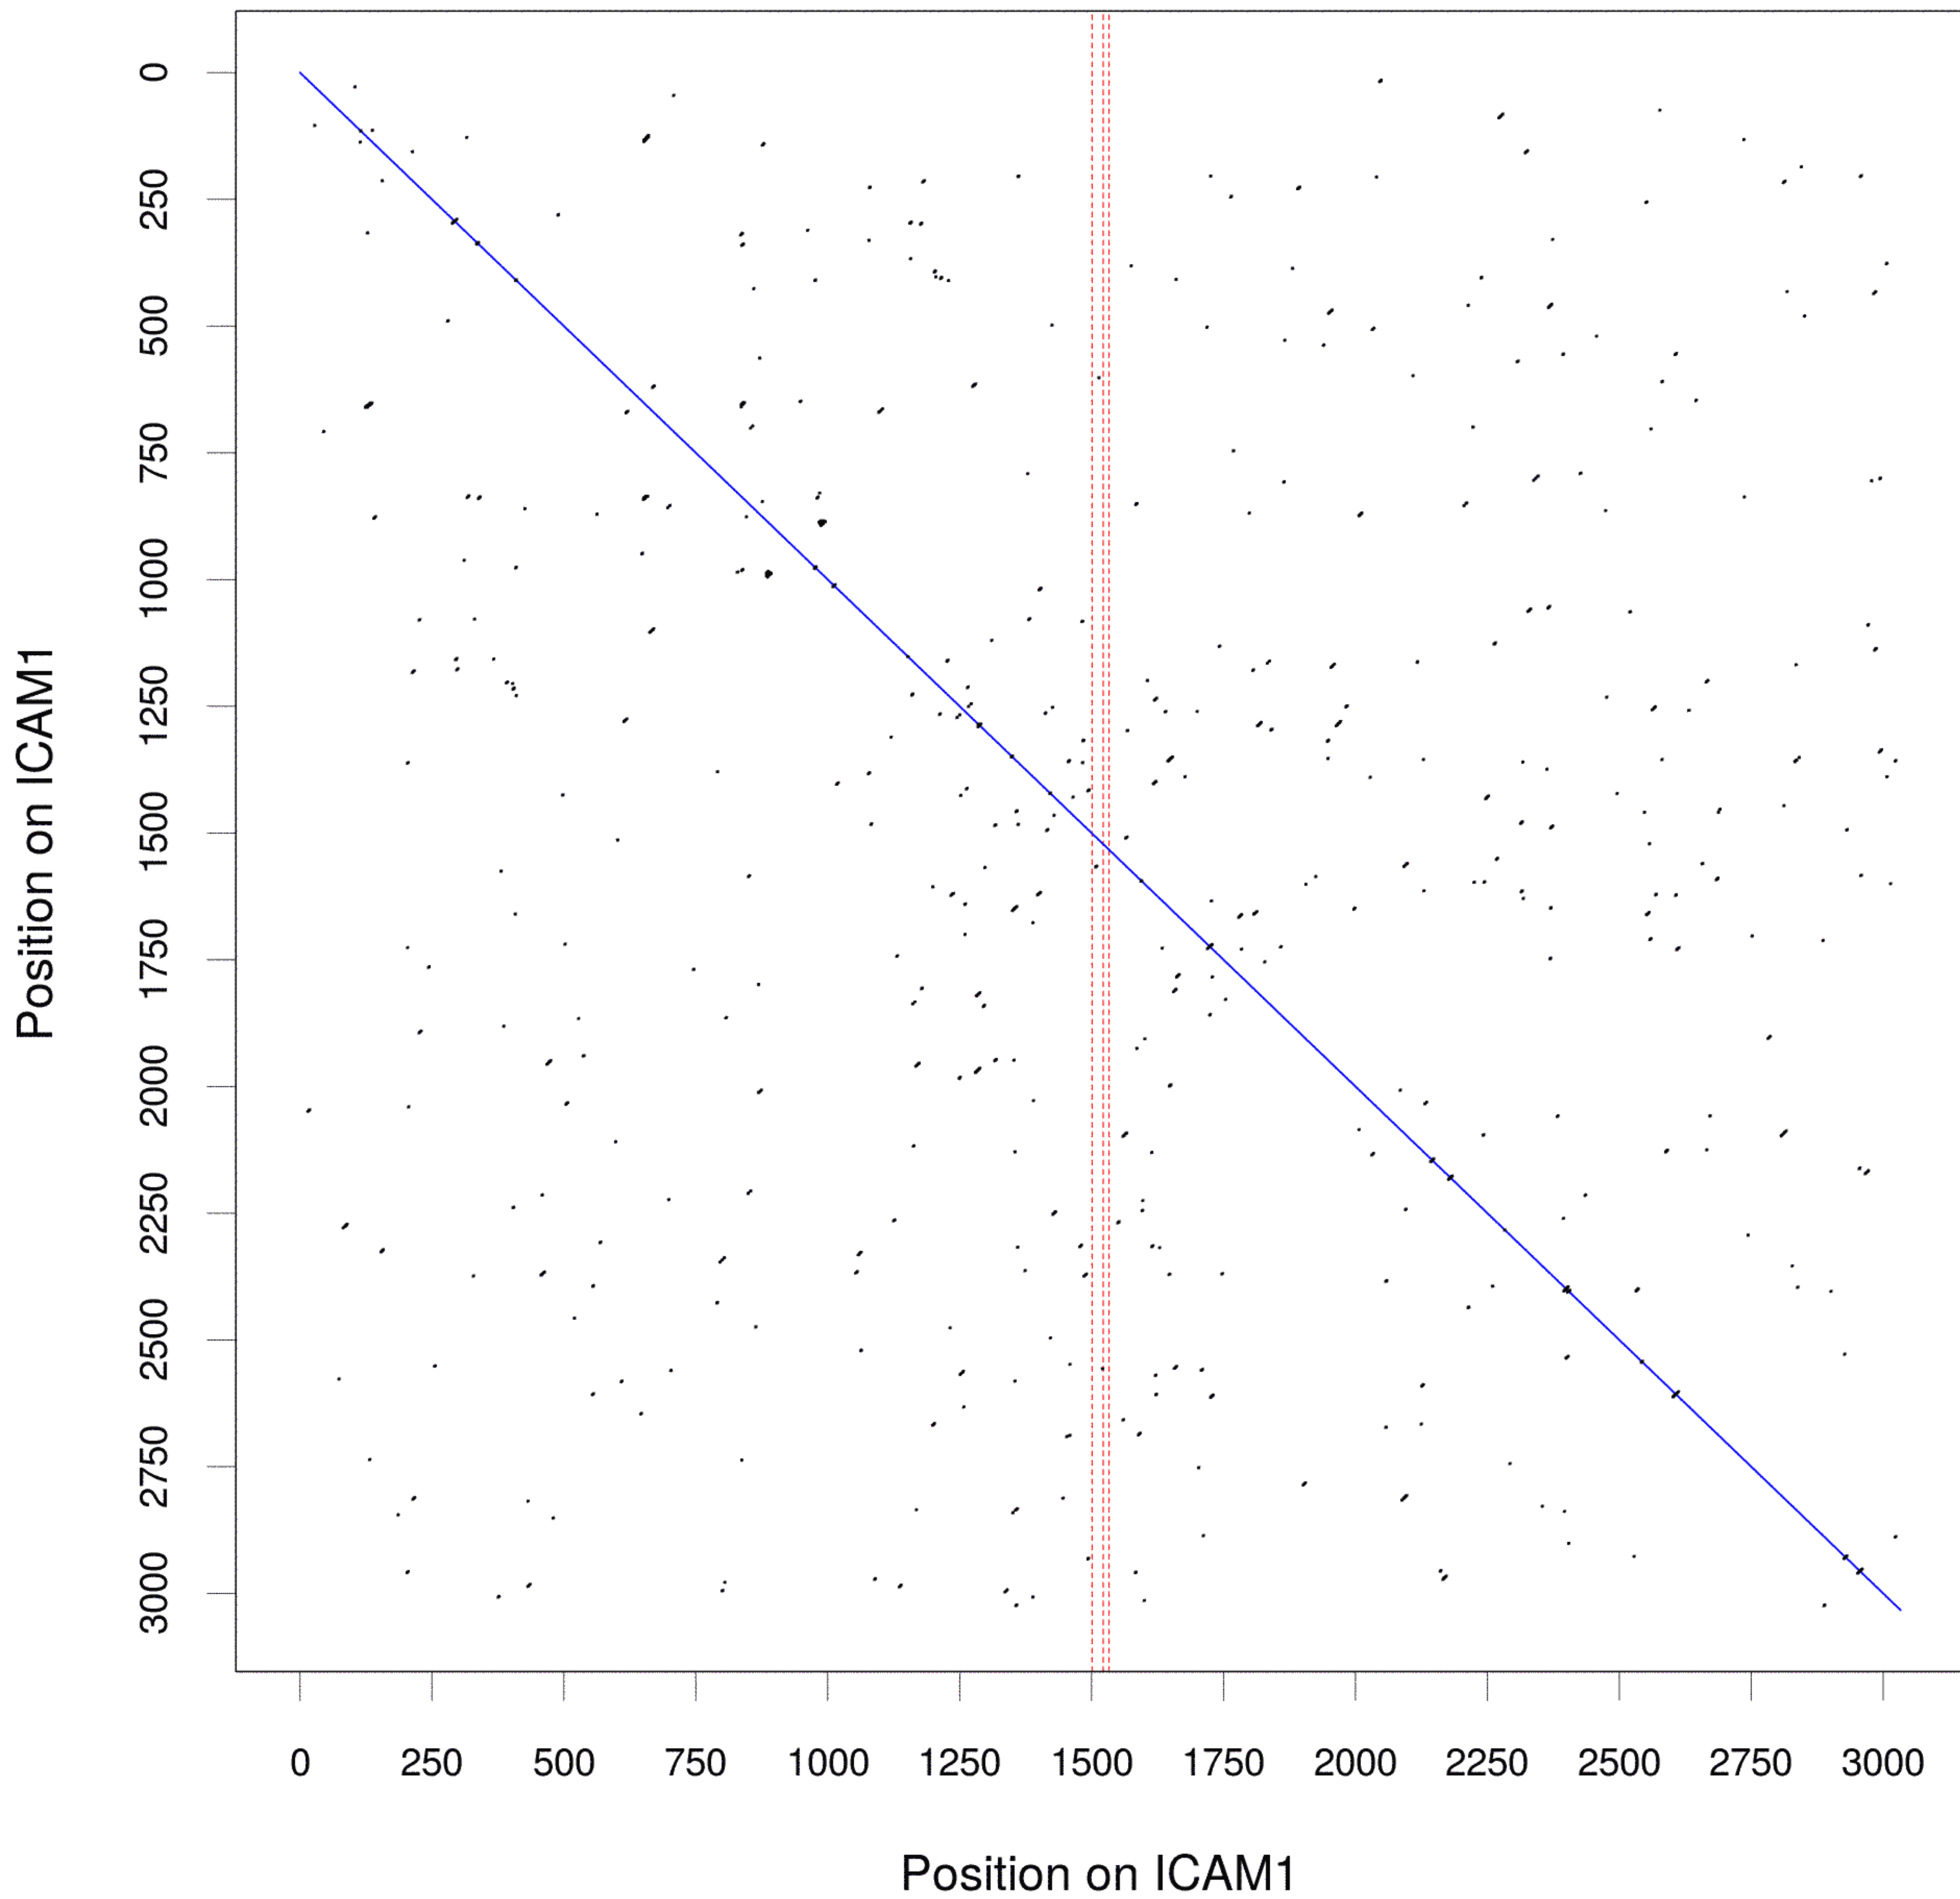

# IFNAR1

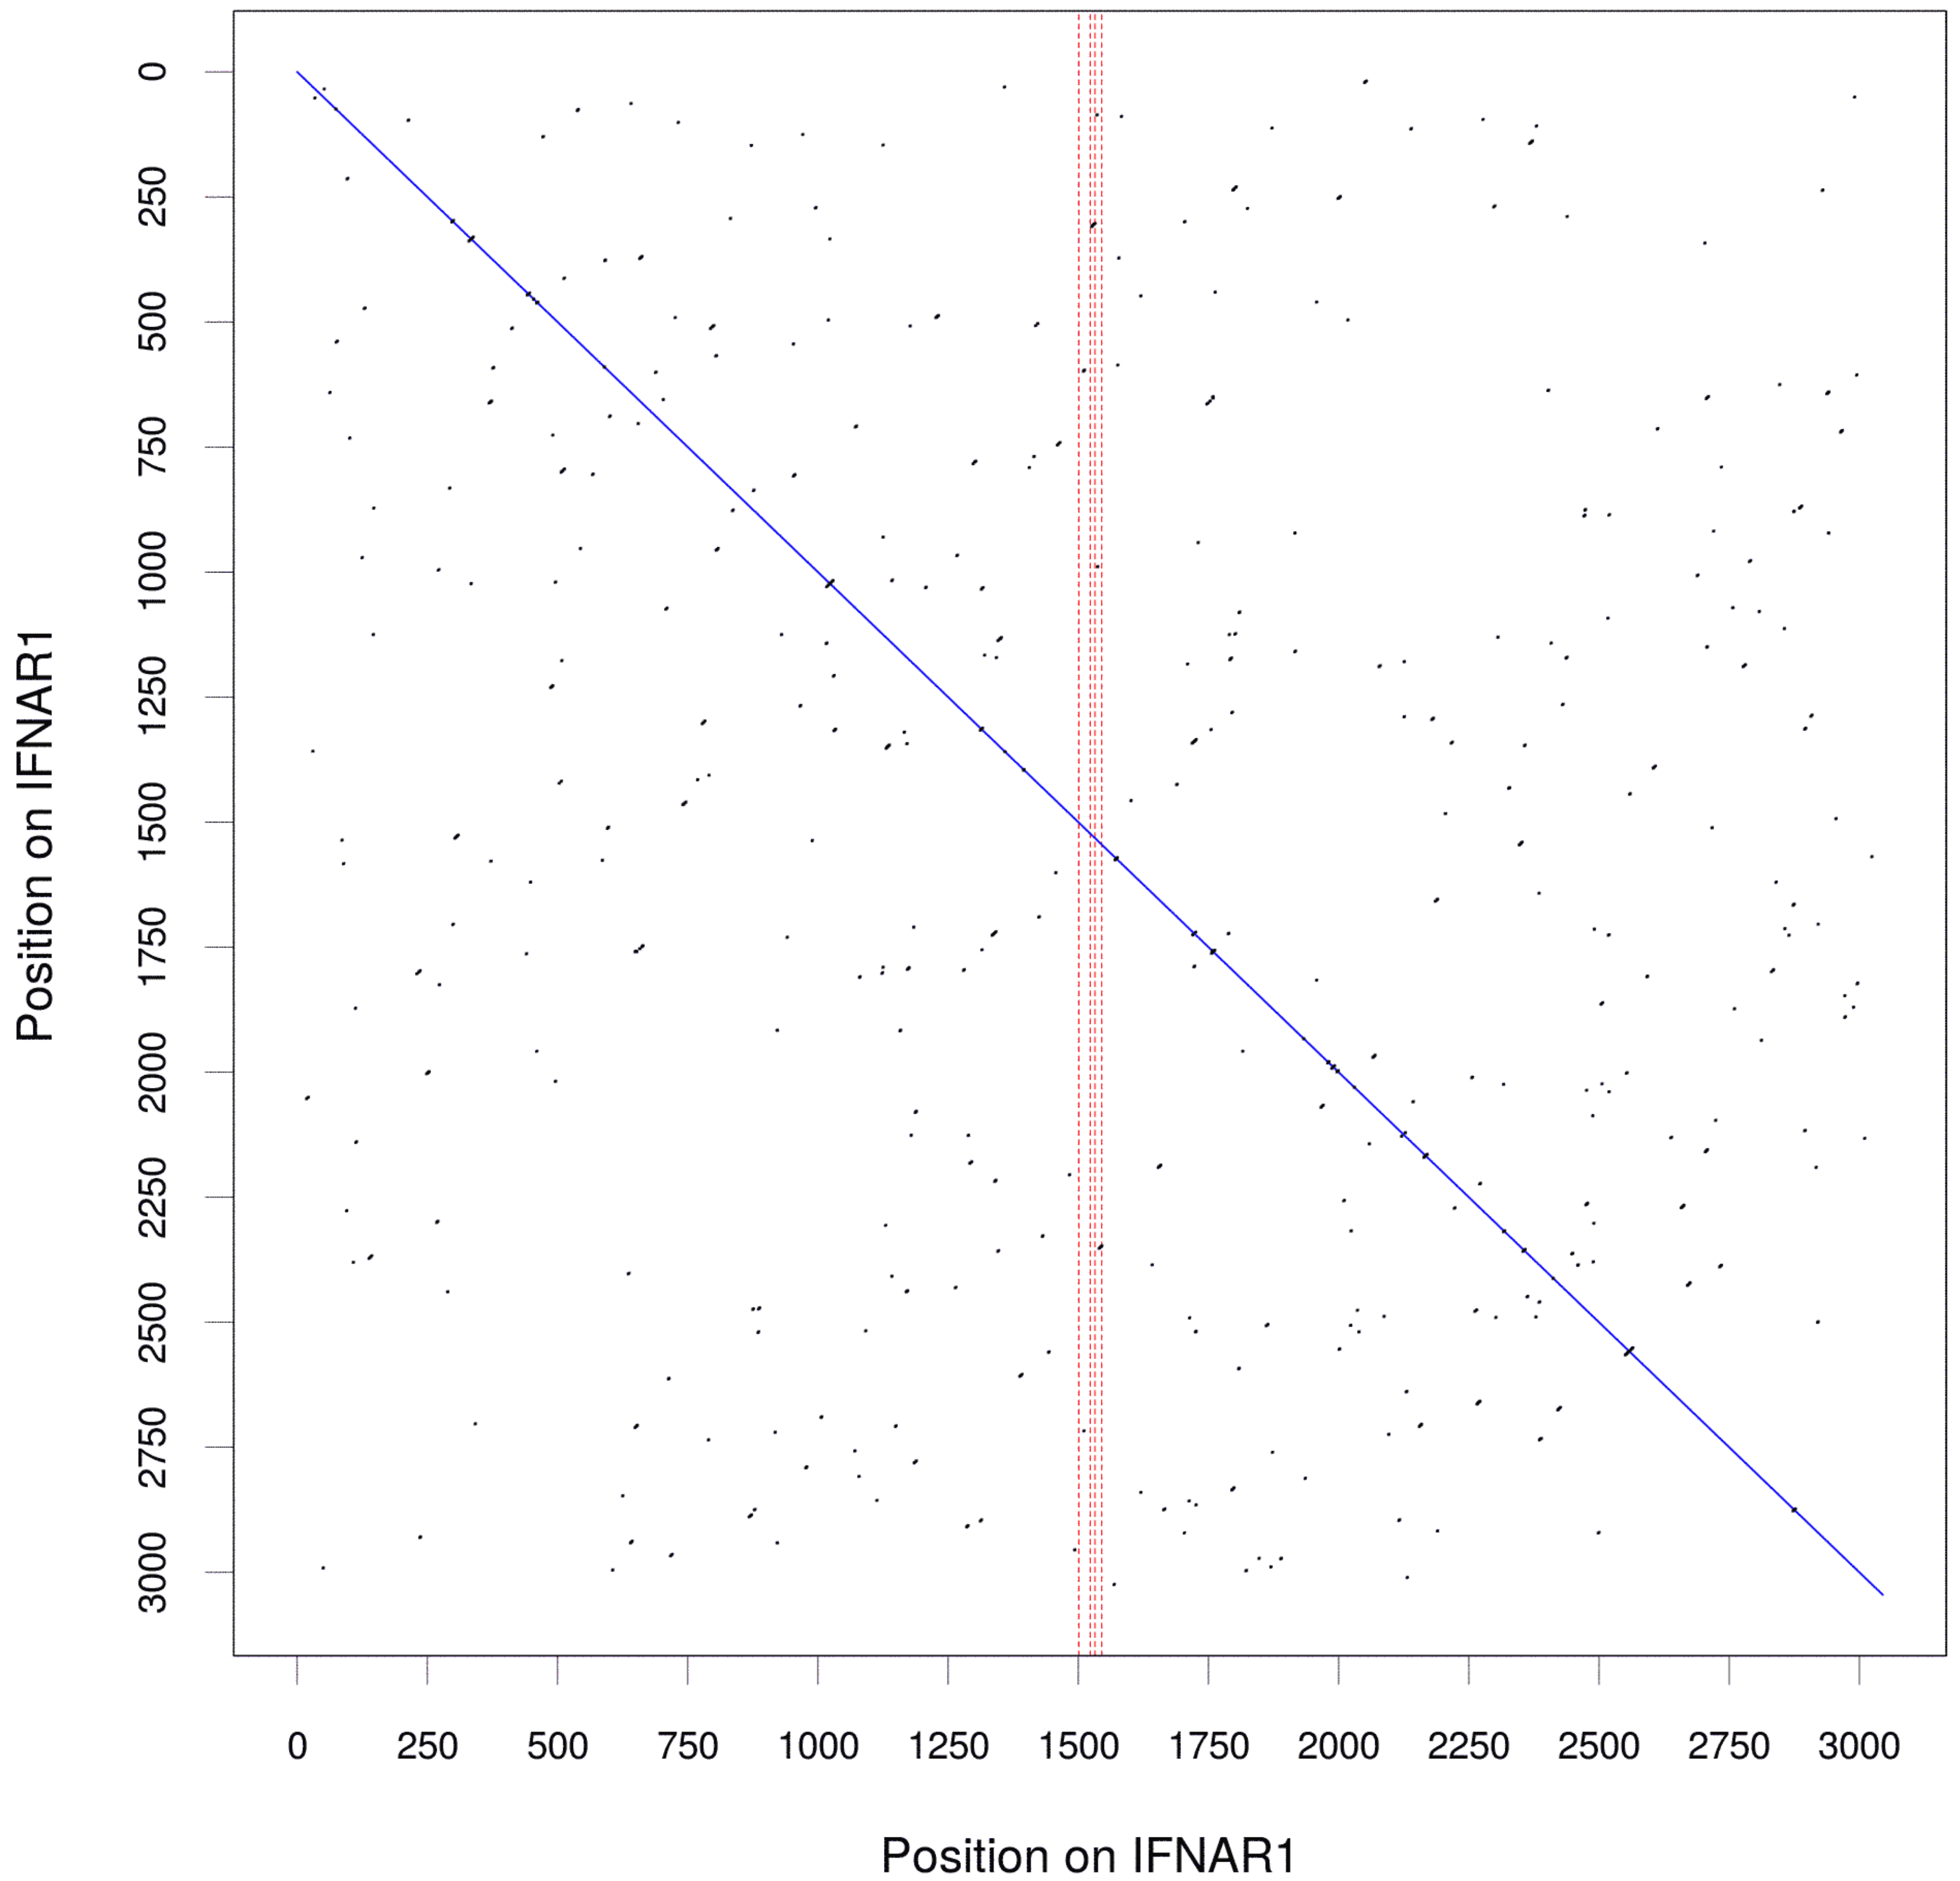

# IFNGR2

Position on IFNGR2

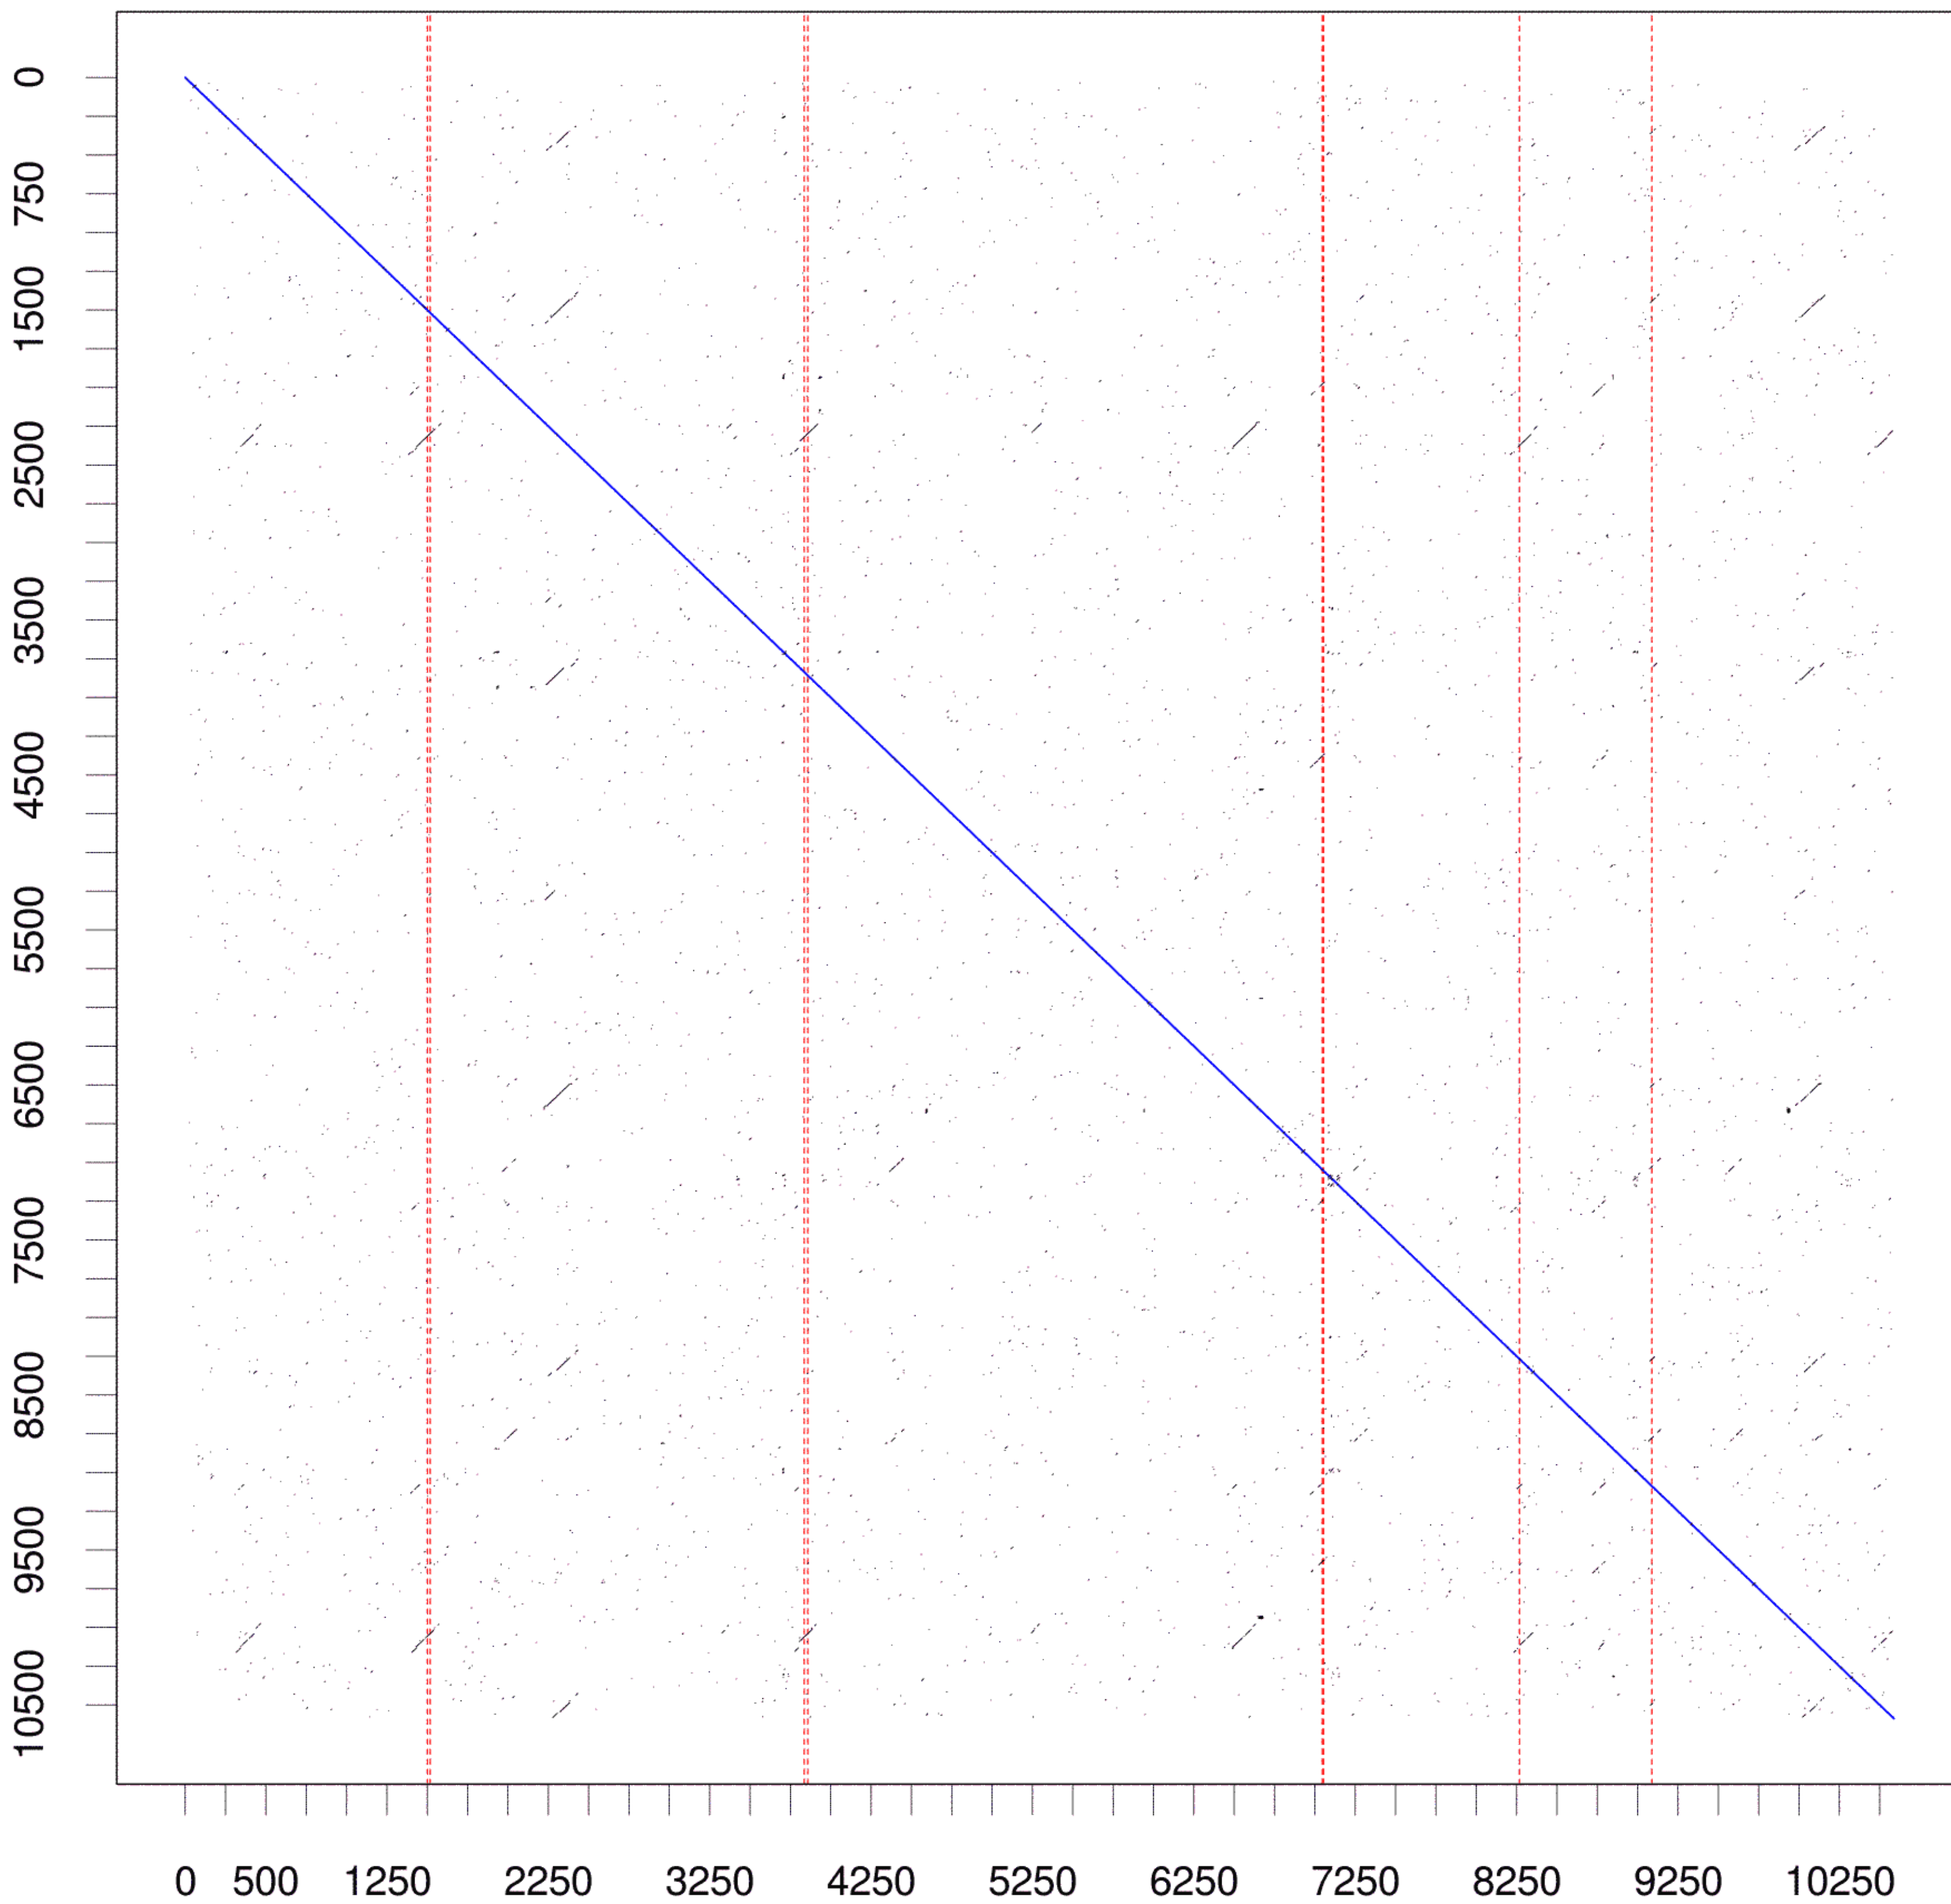

Position on IFNGR2

# IGF2

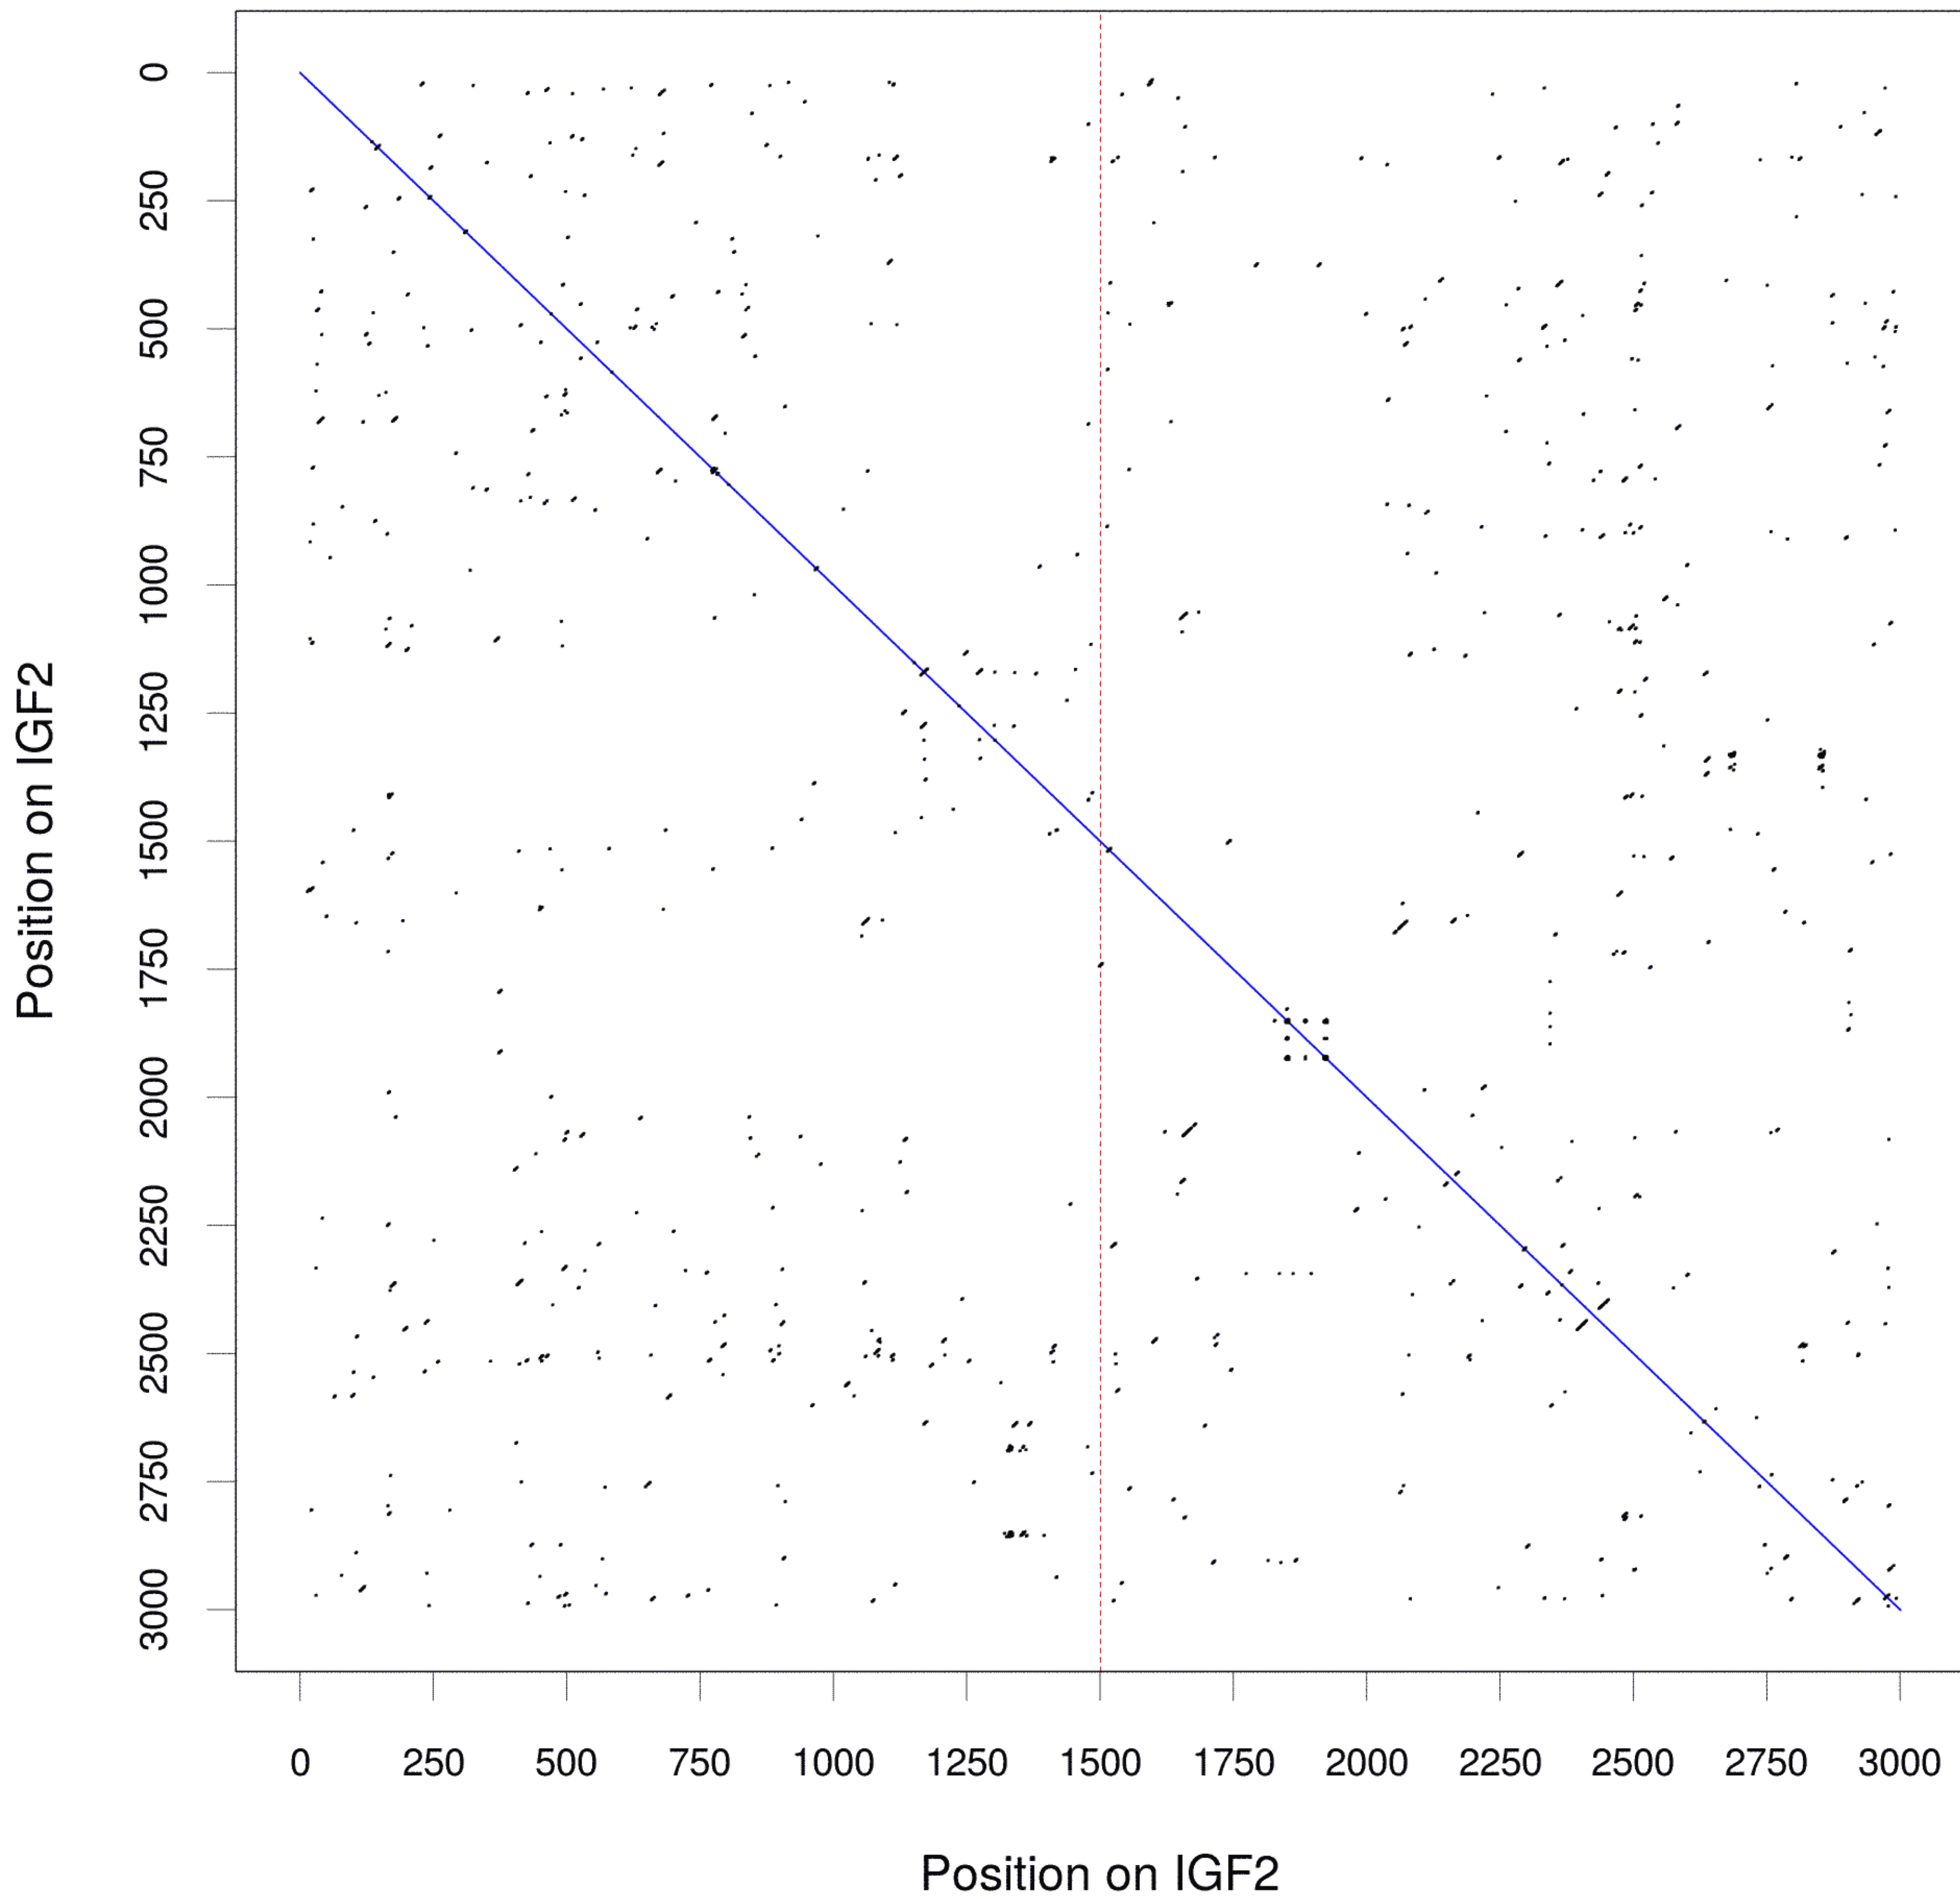

# INPP5B

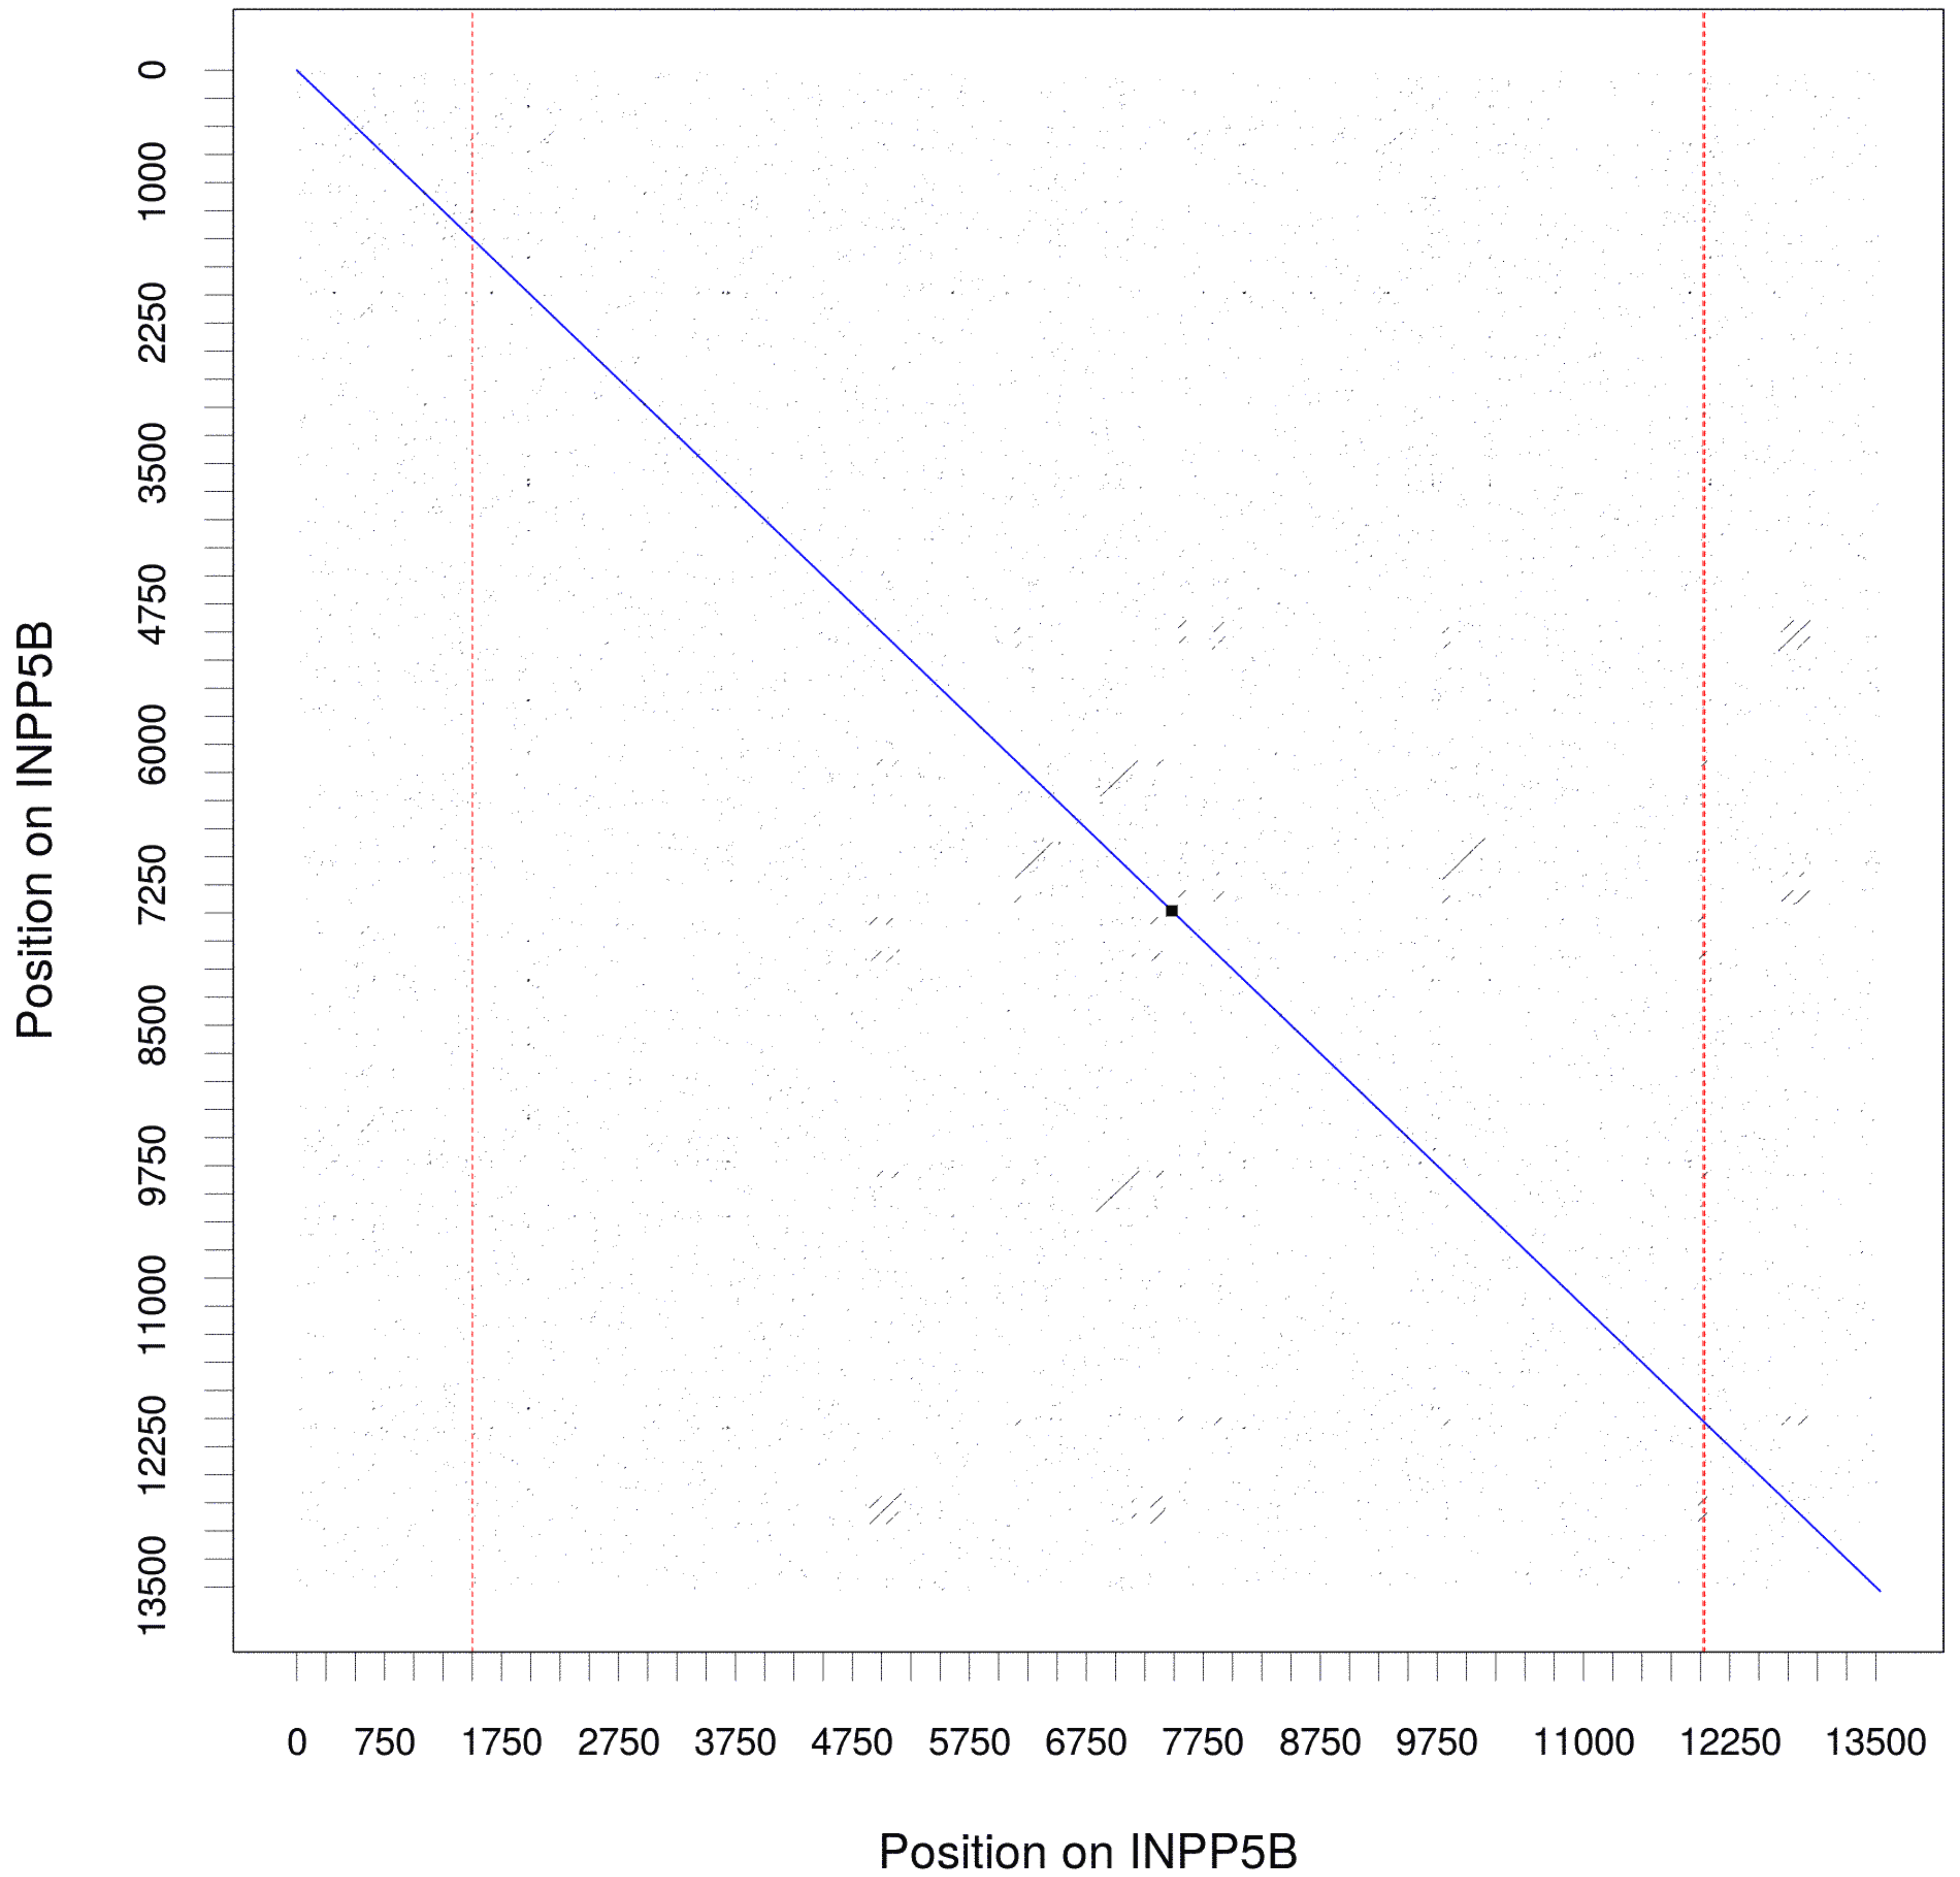



# IRX1

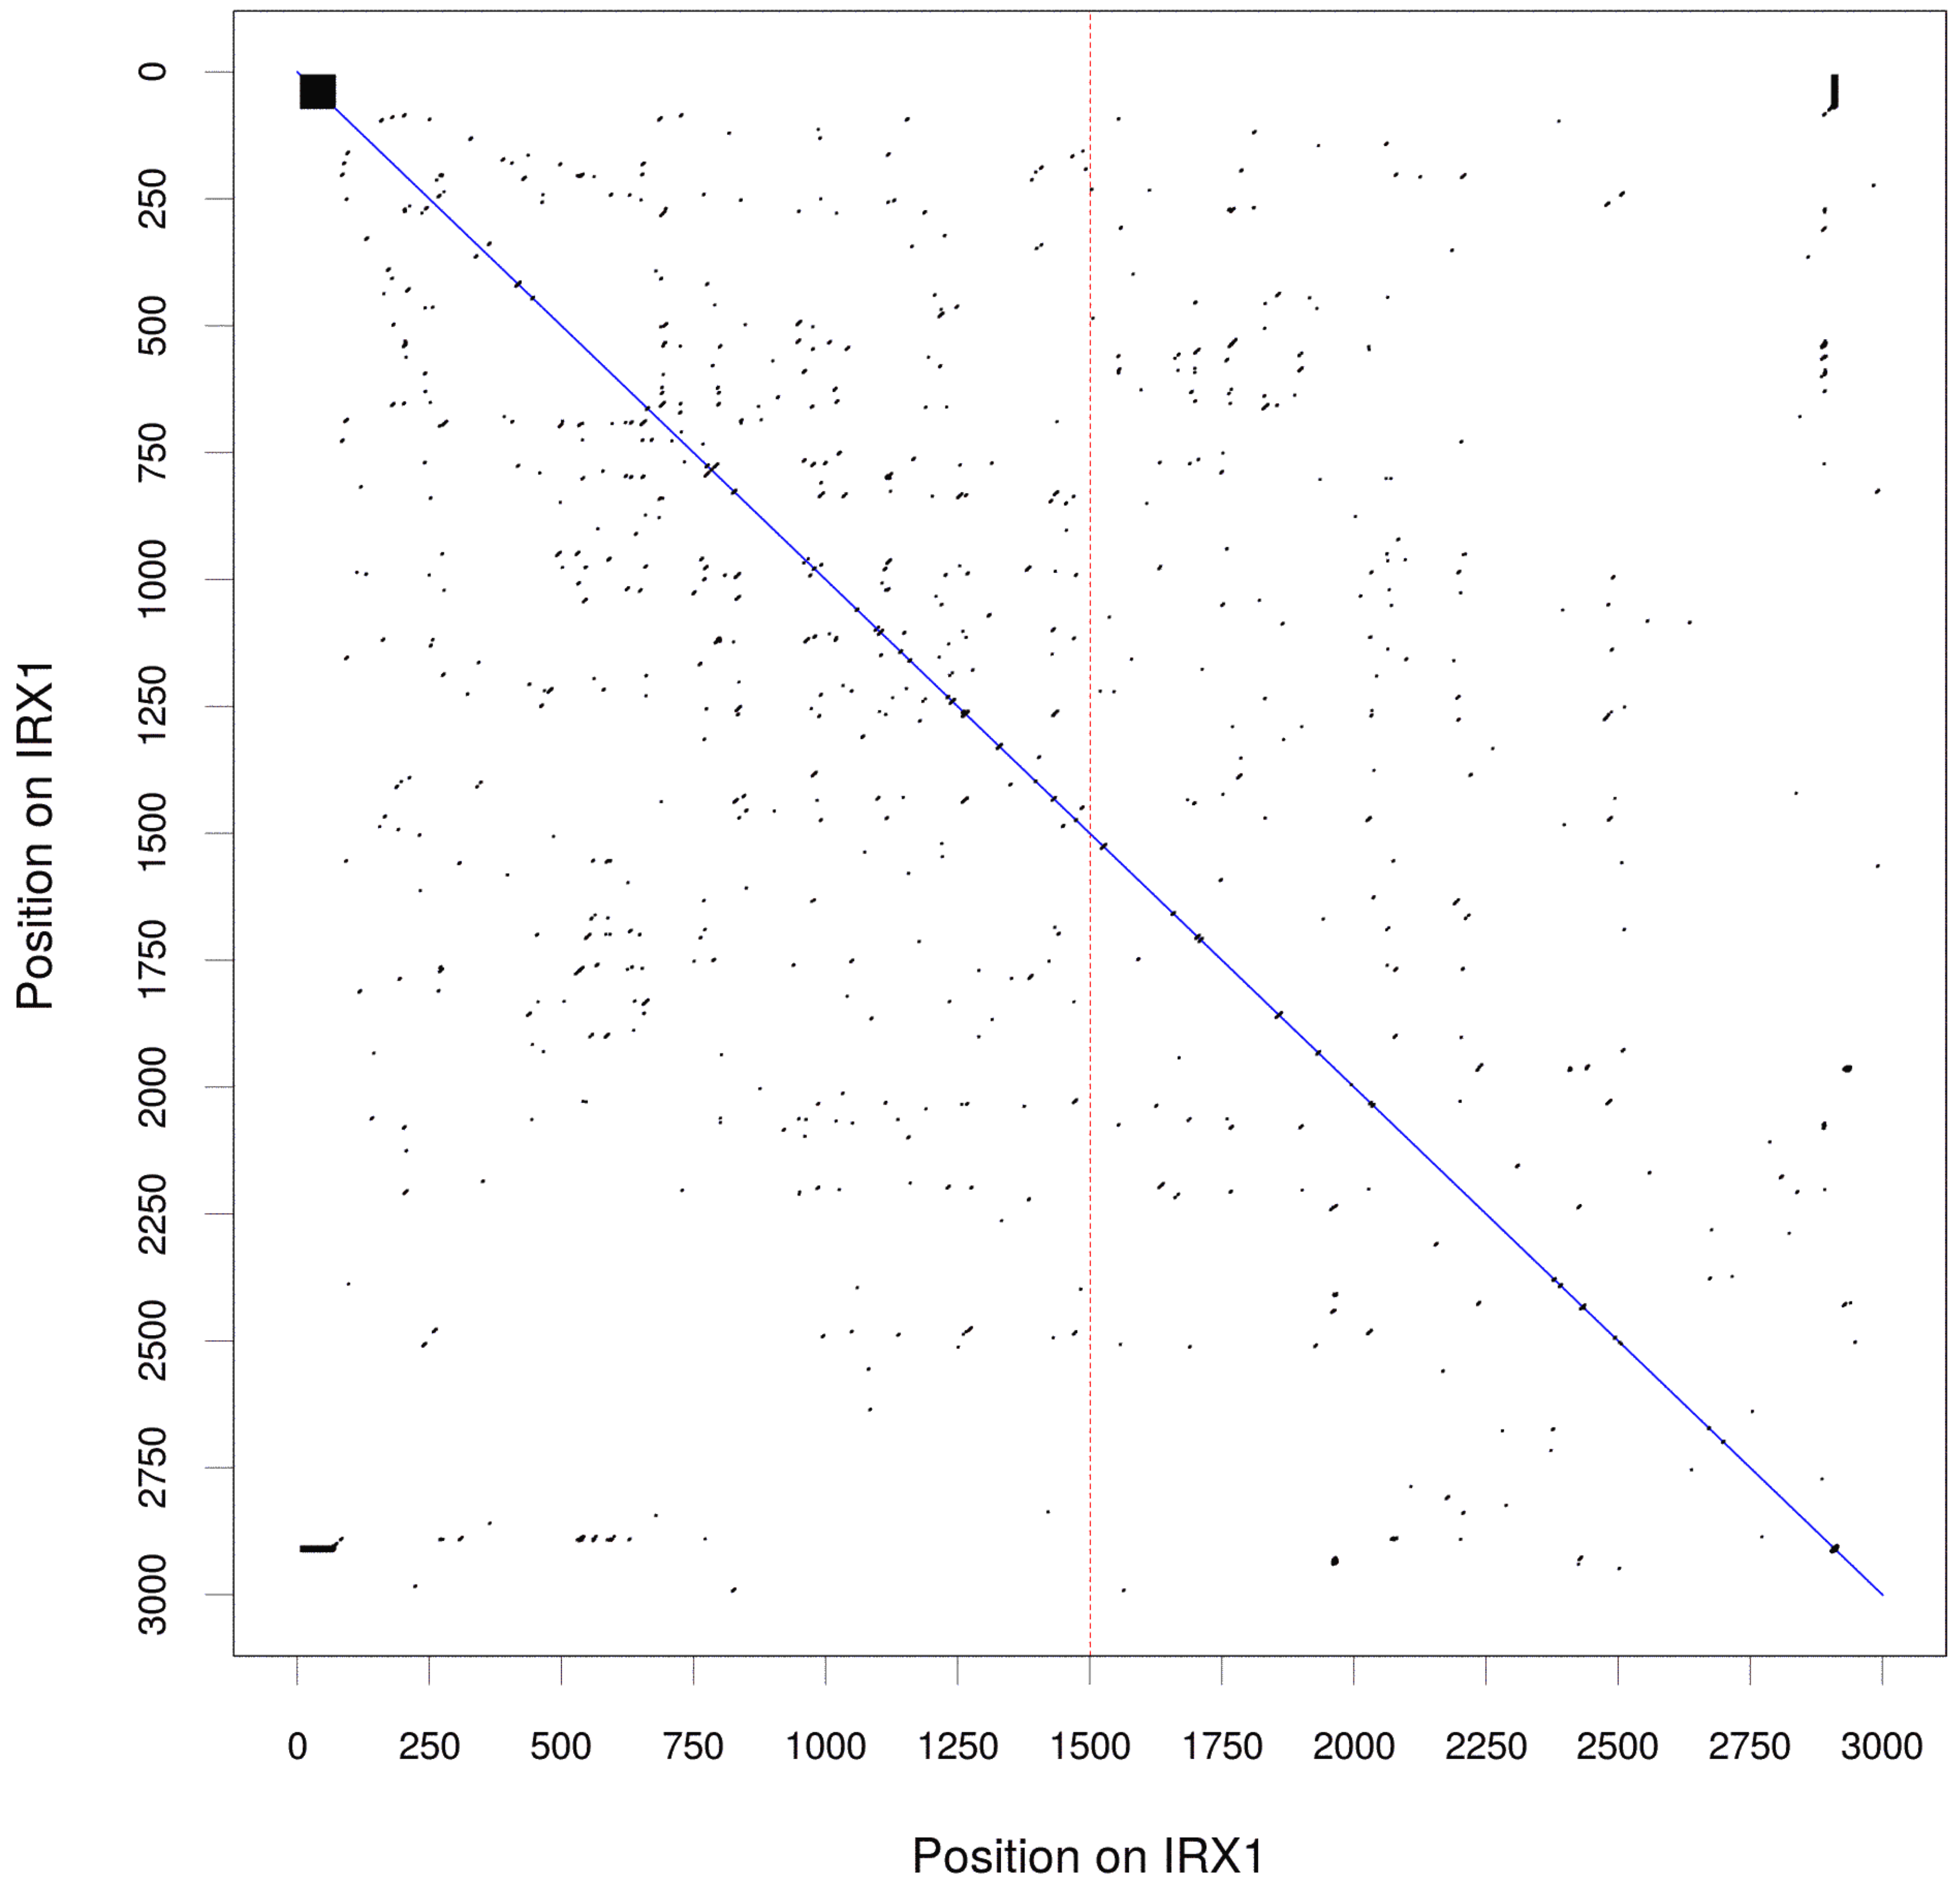

# IRX4

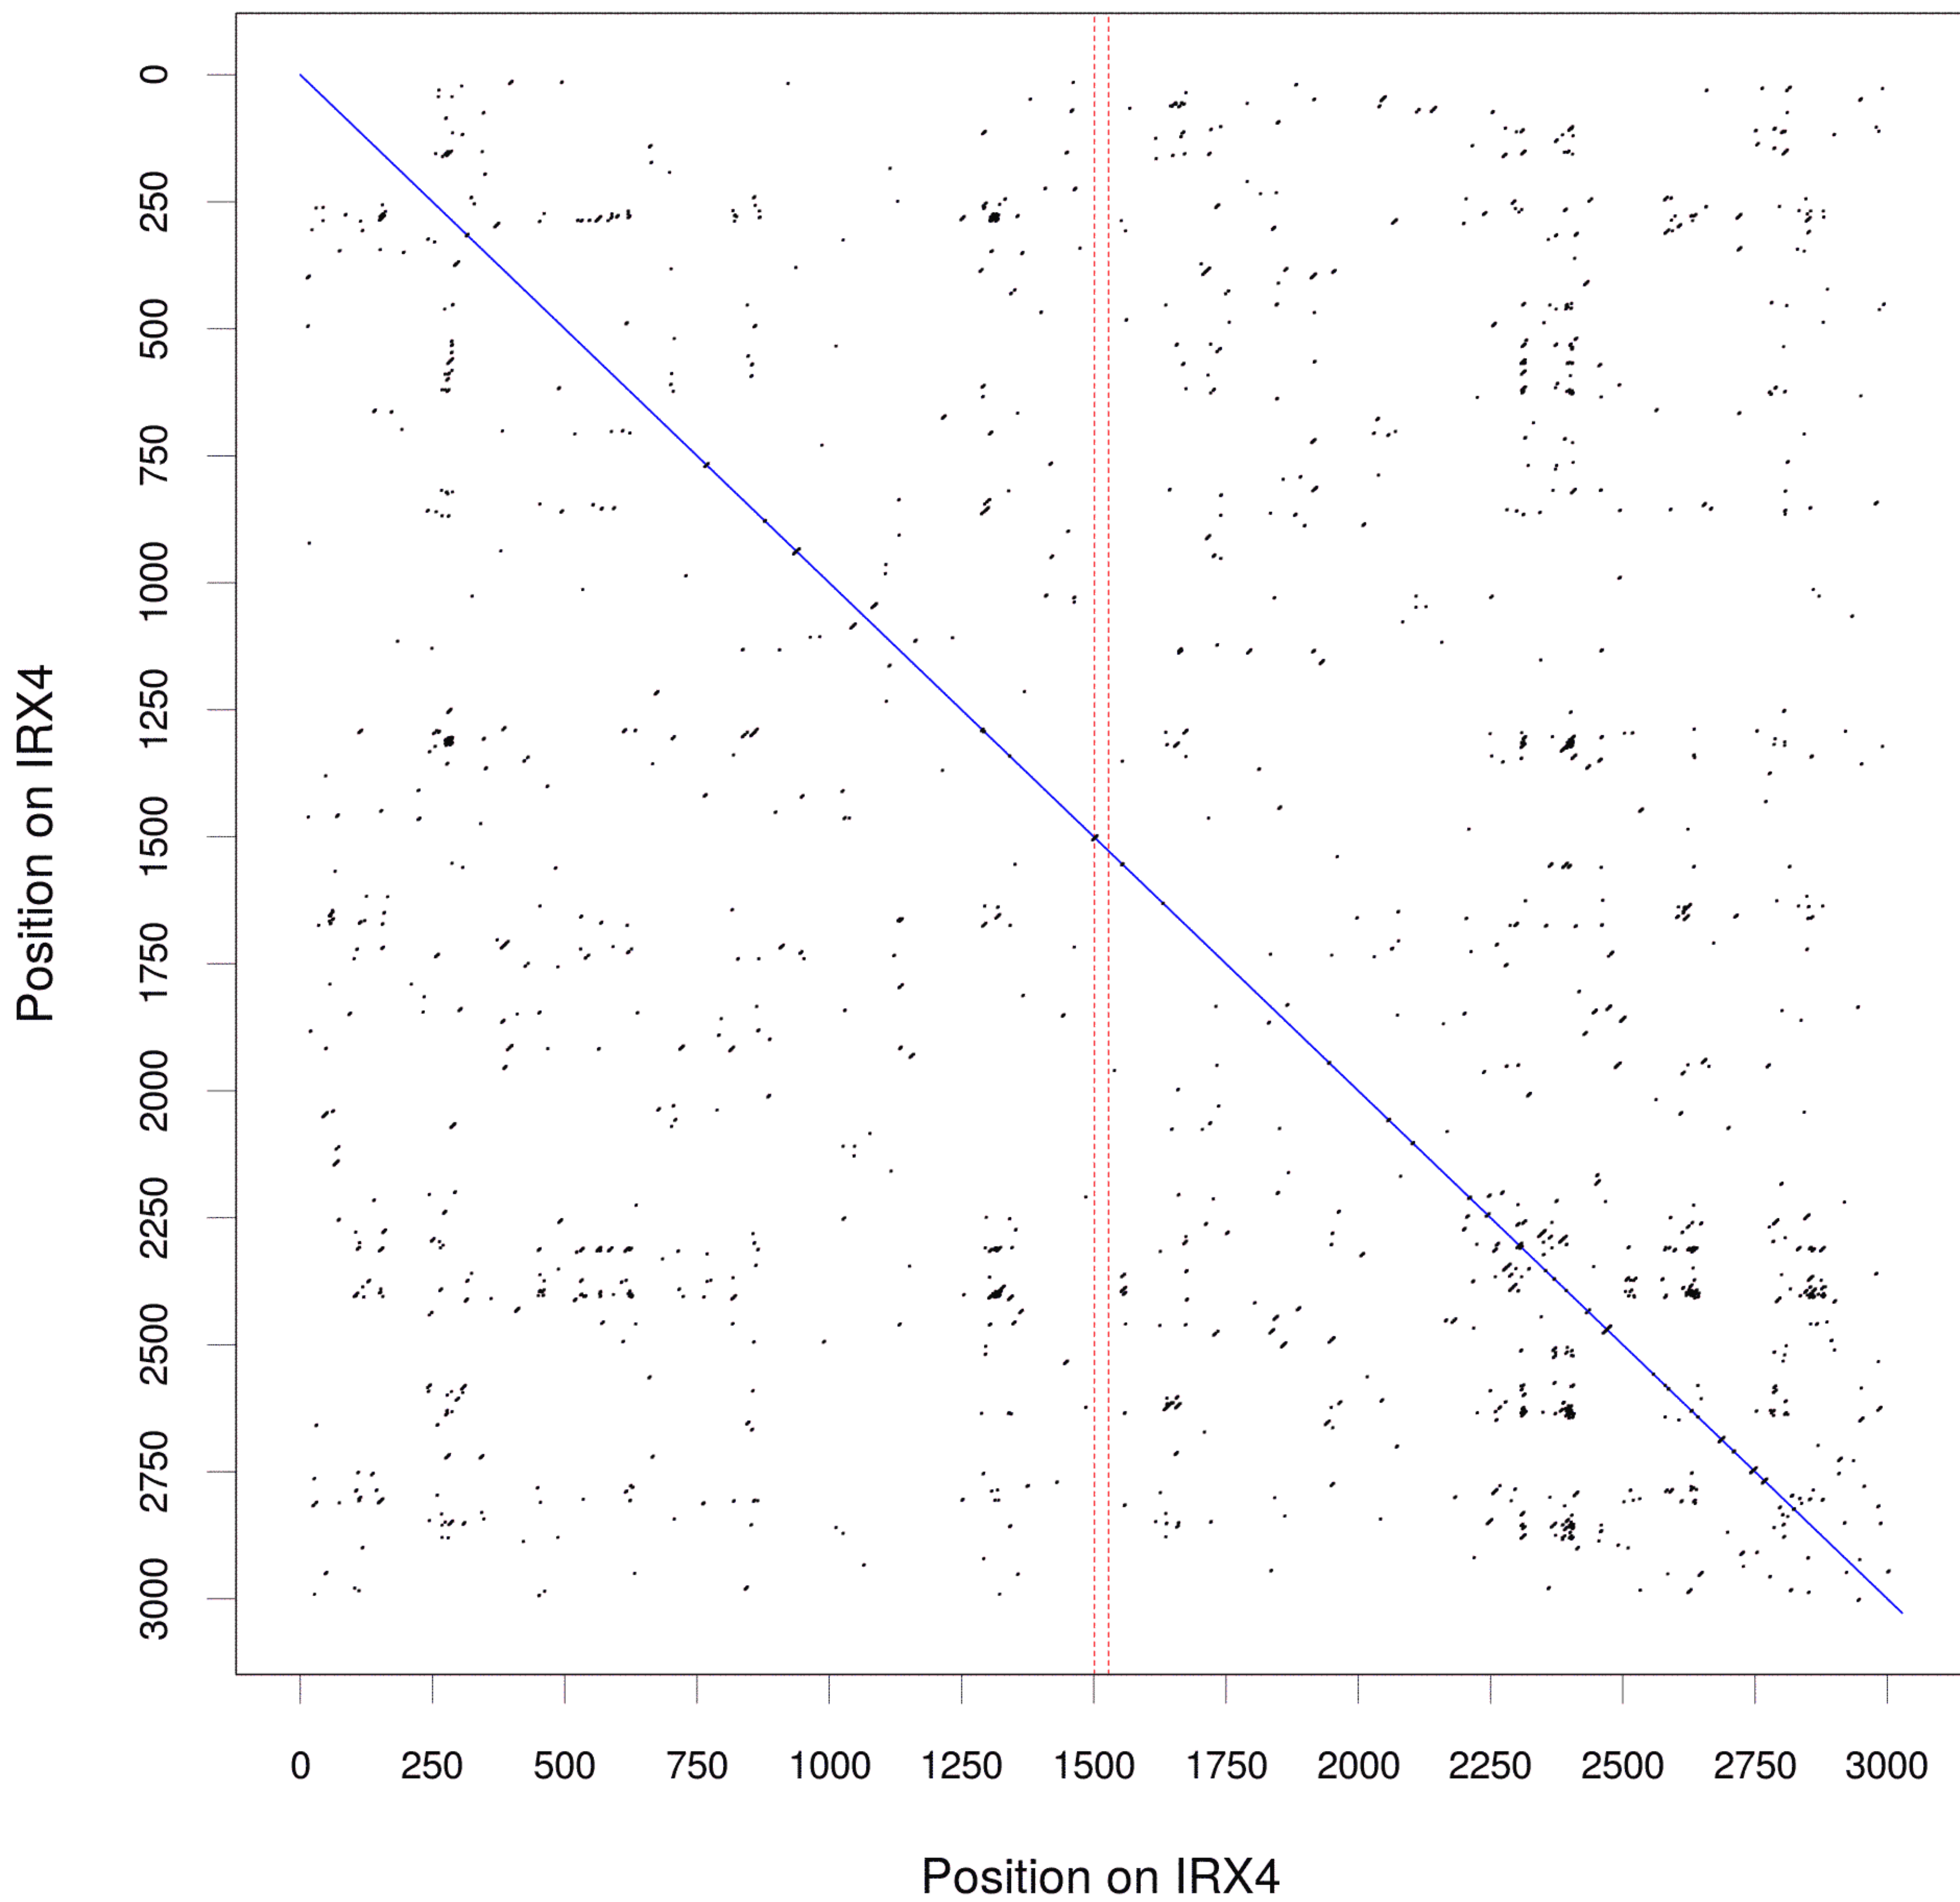

# KANK3

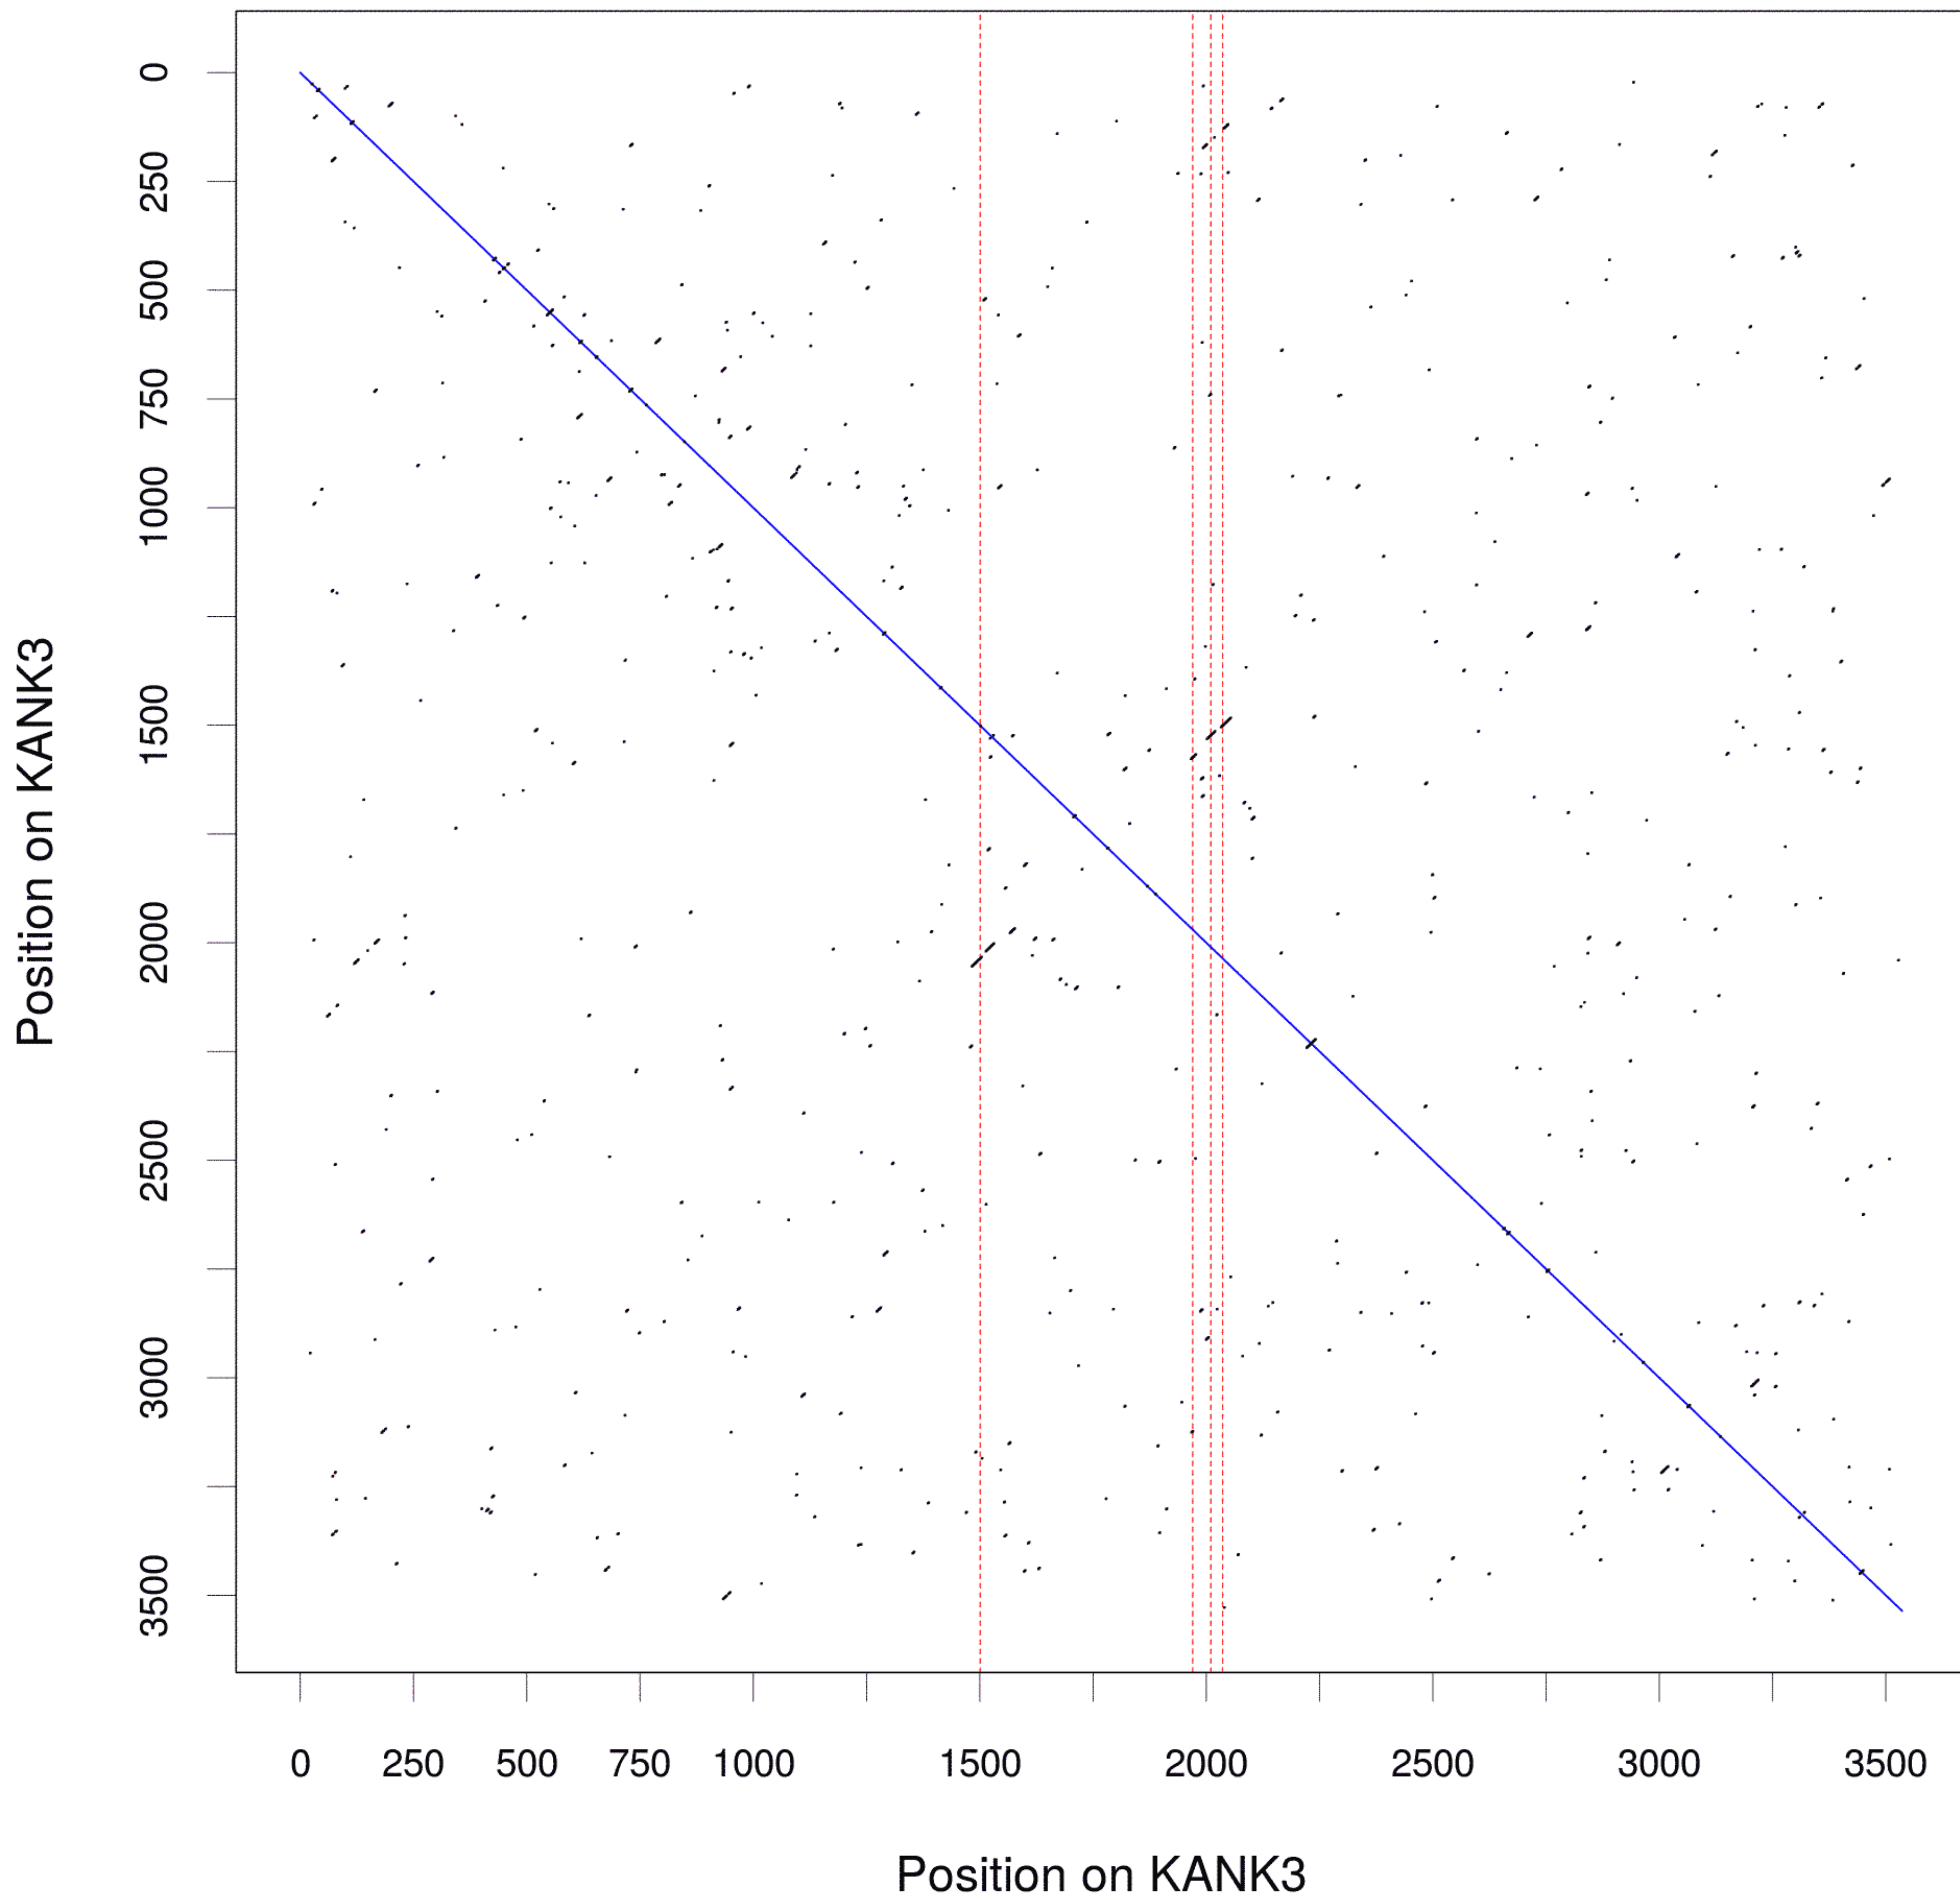

# KBTBD5

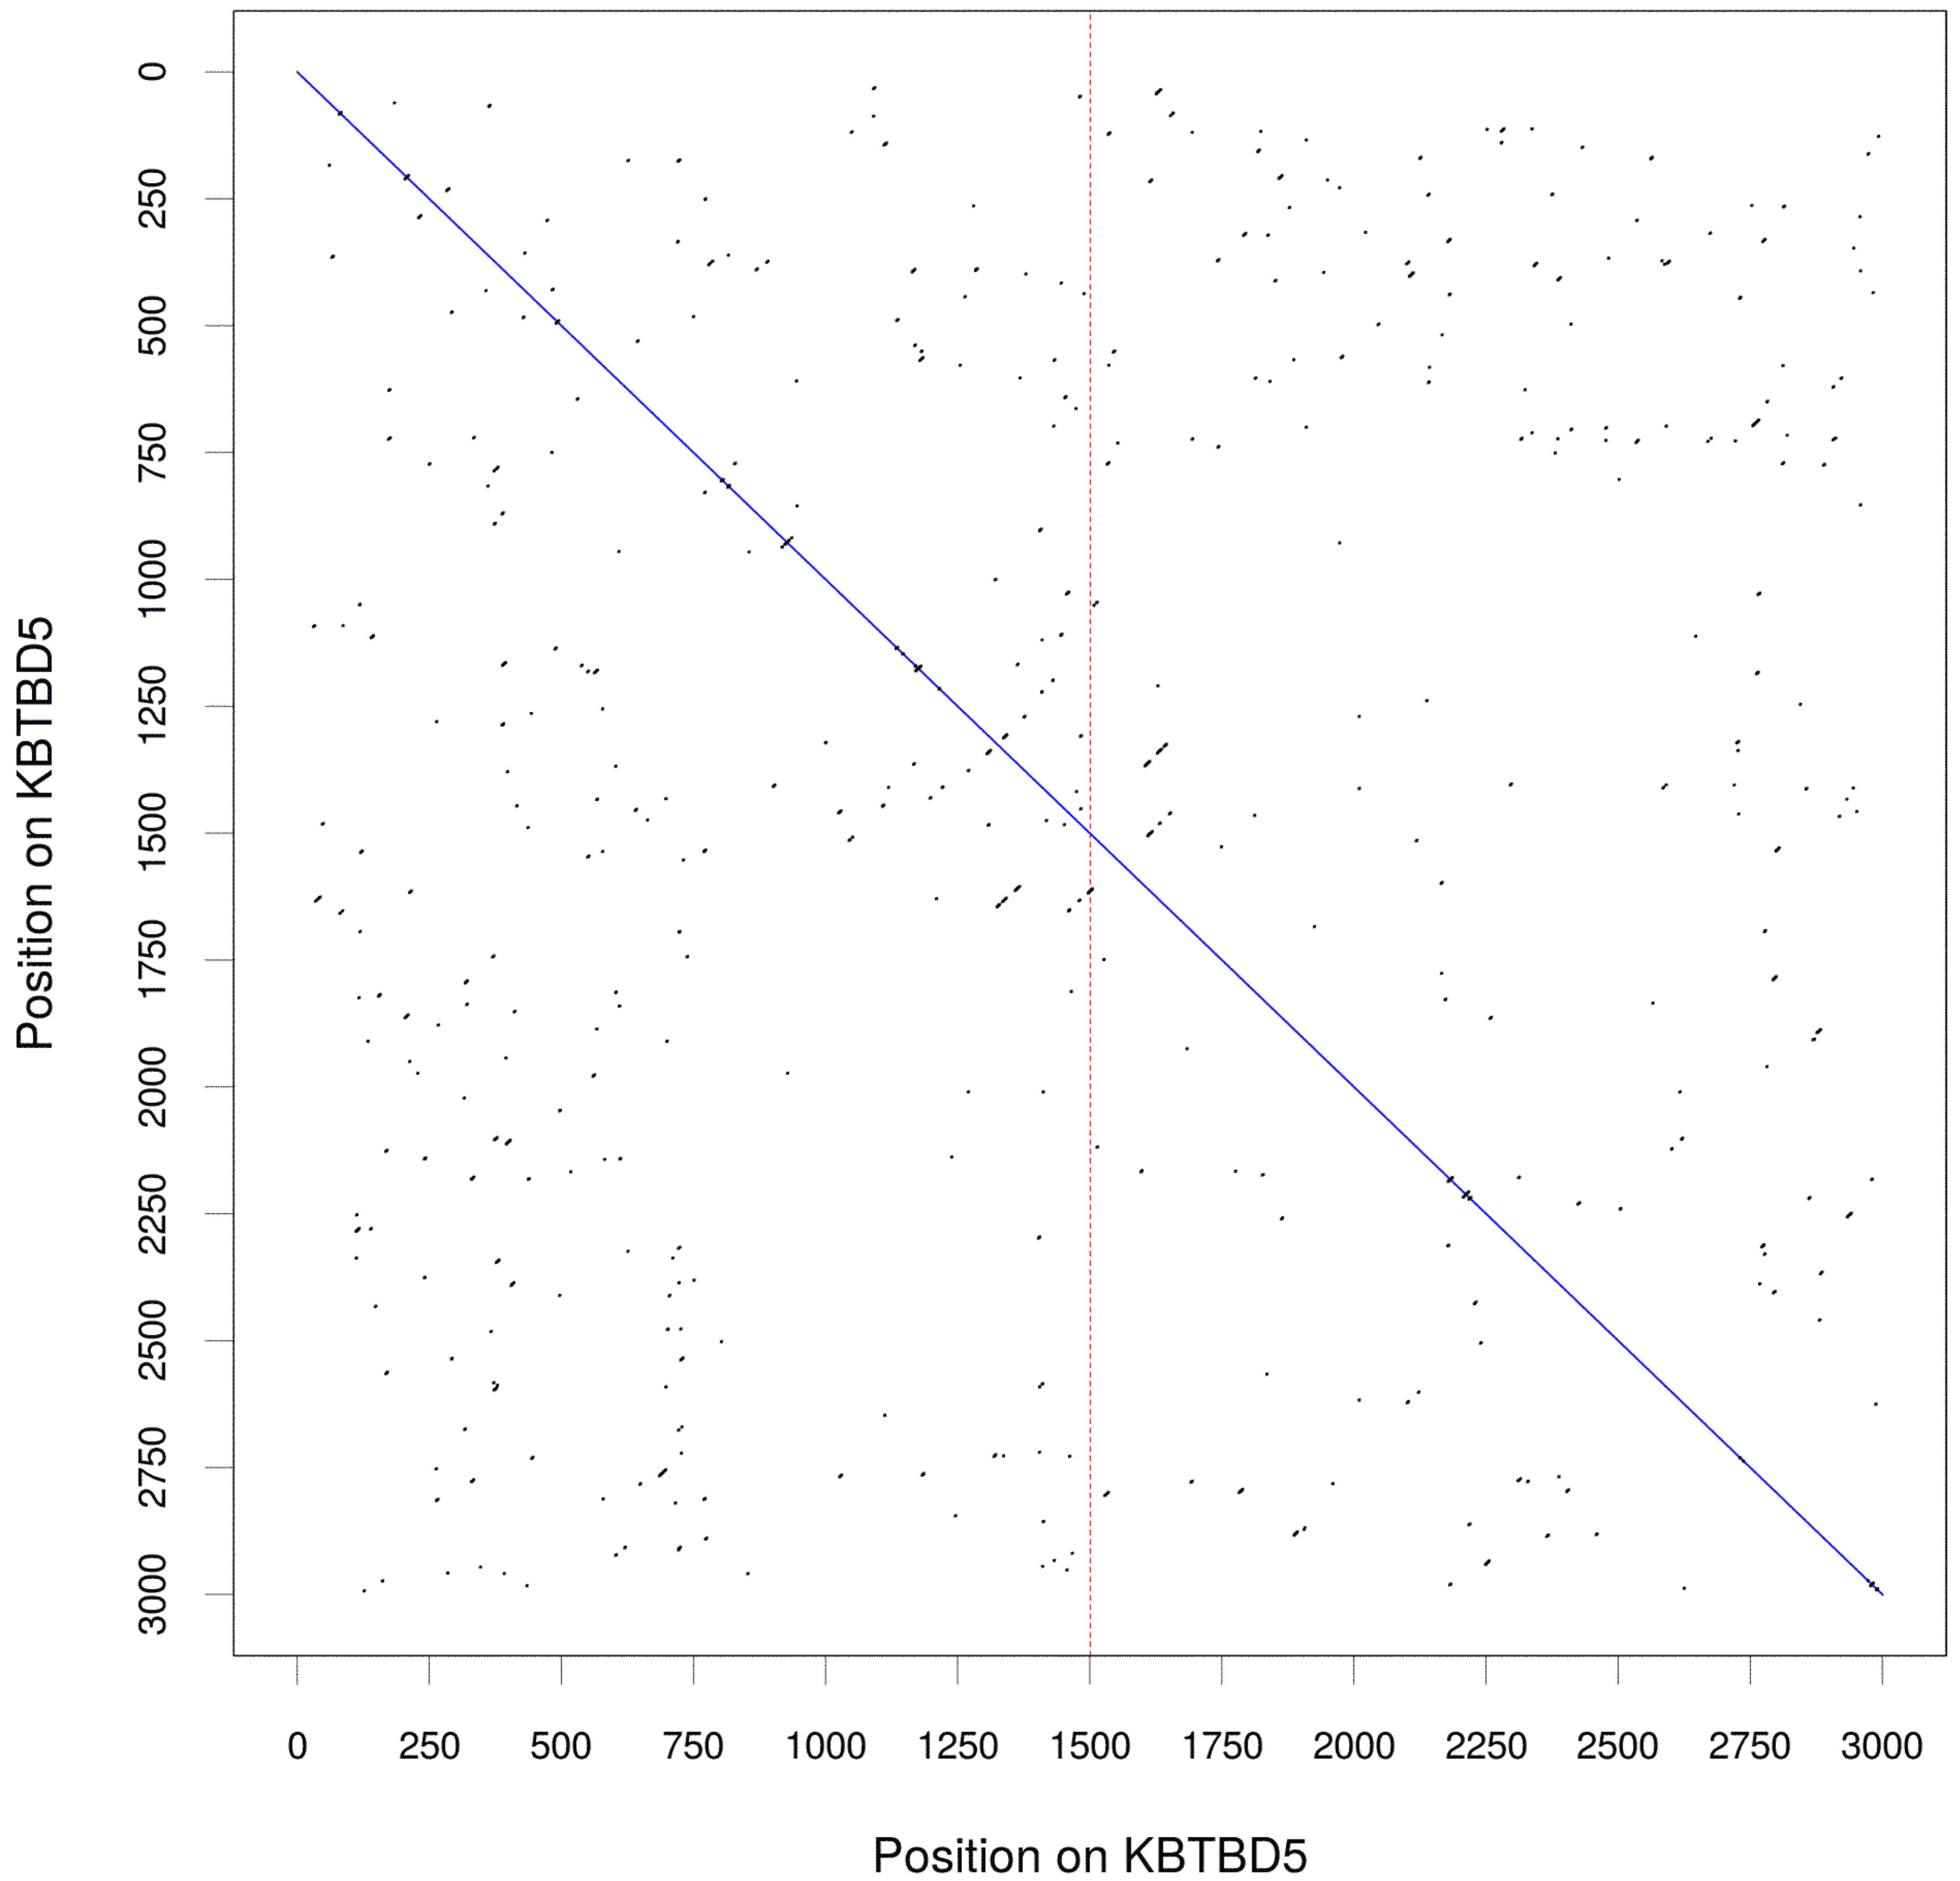

# KIAA1161

Position on KIAA1161

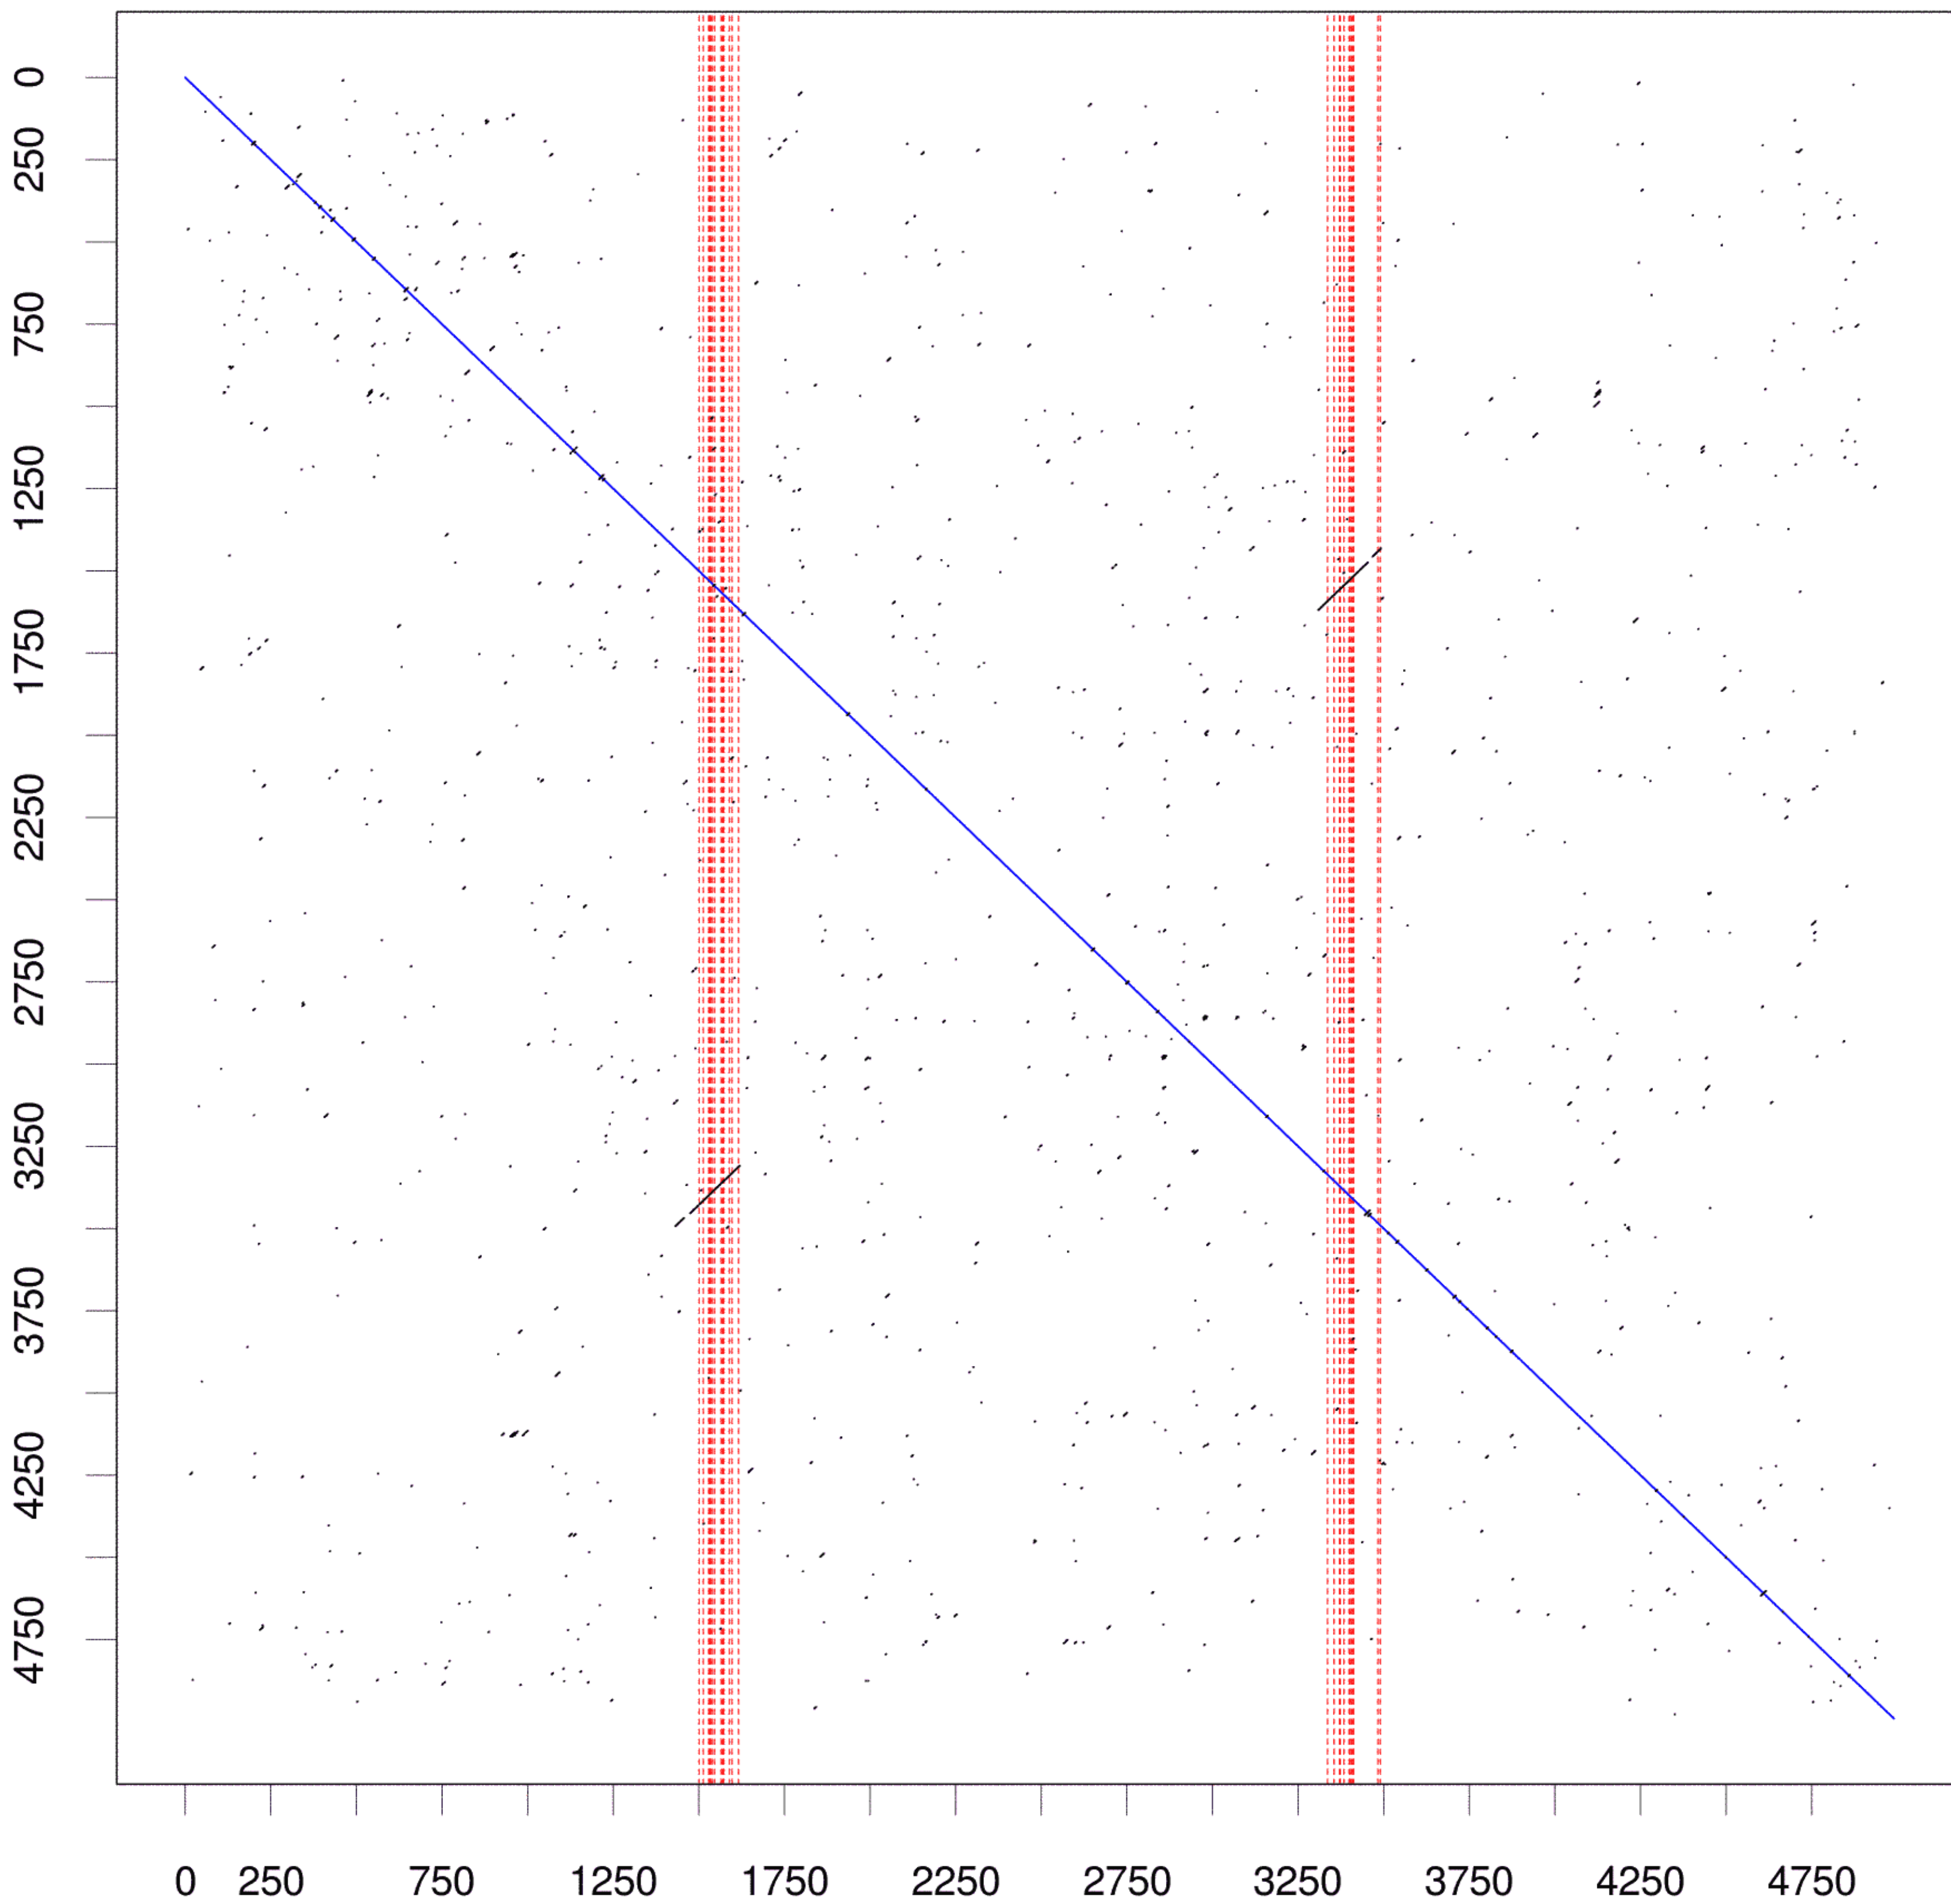

Position on KIAA1161

# KIF25

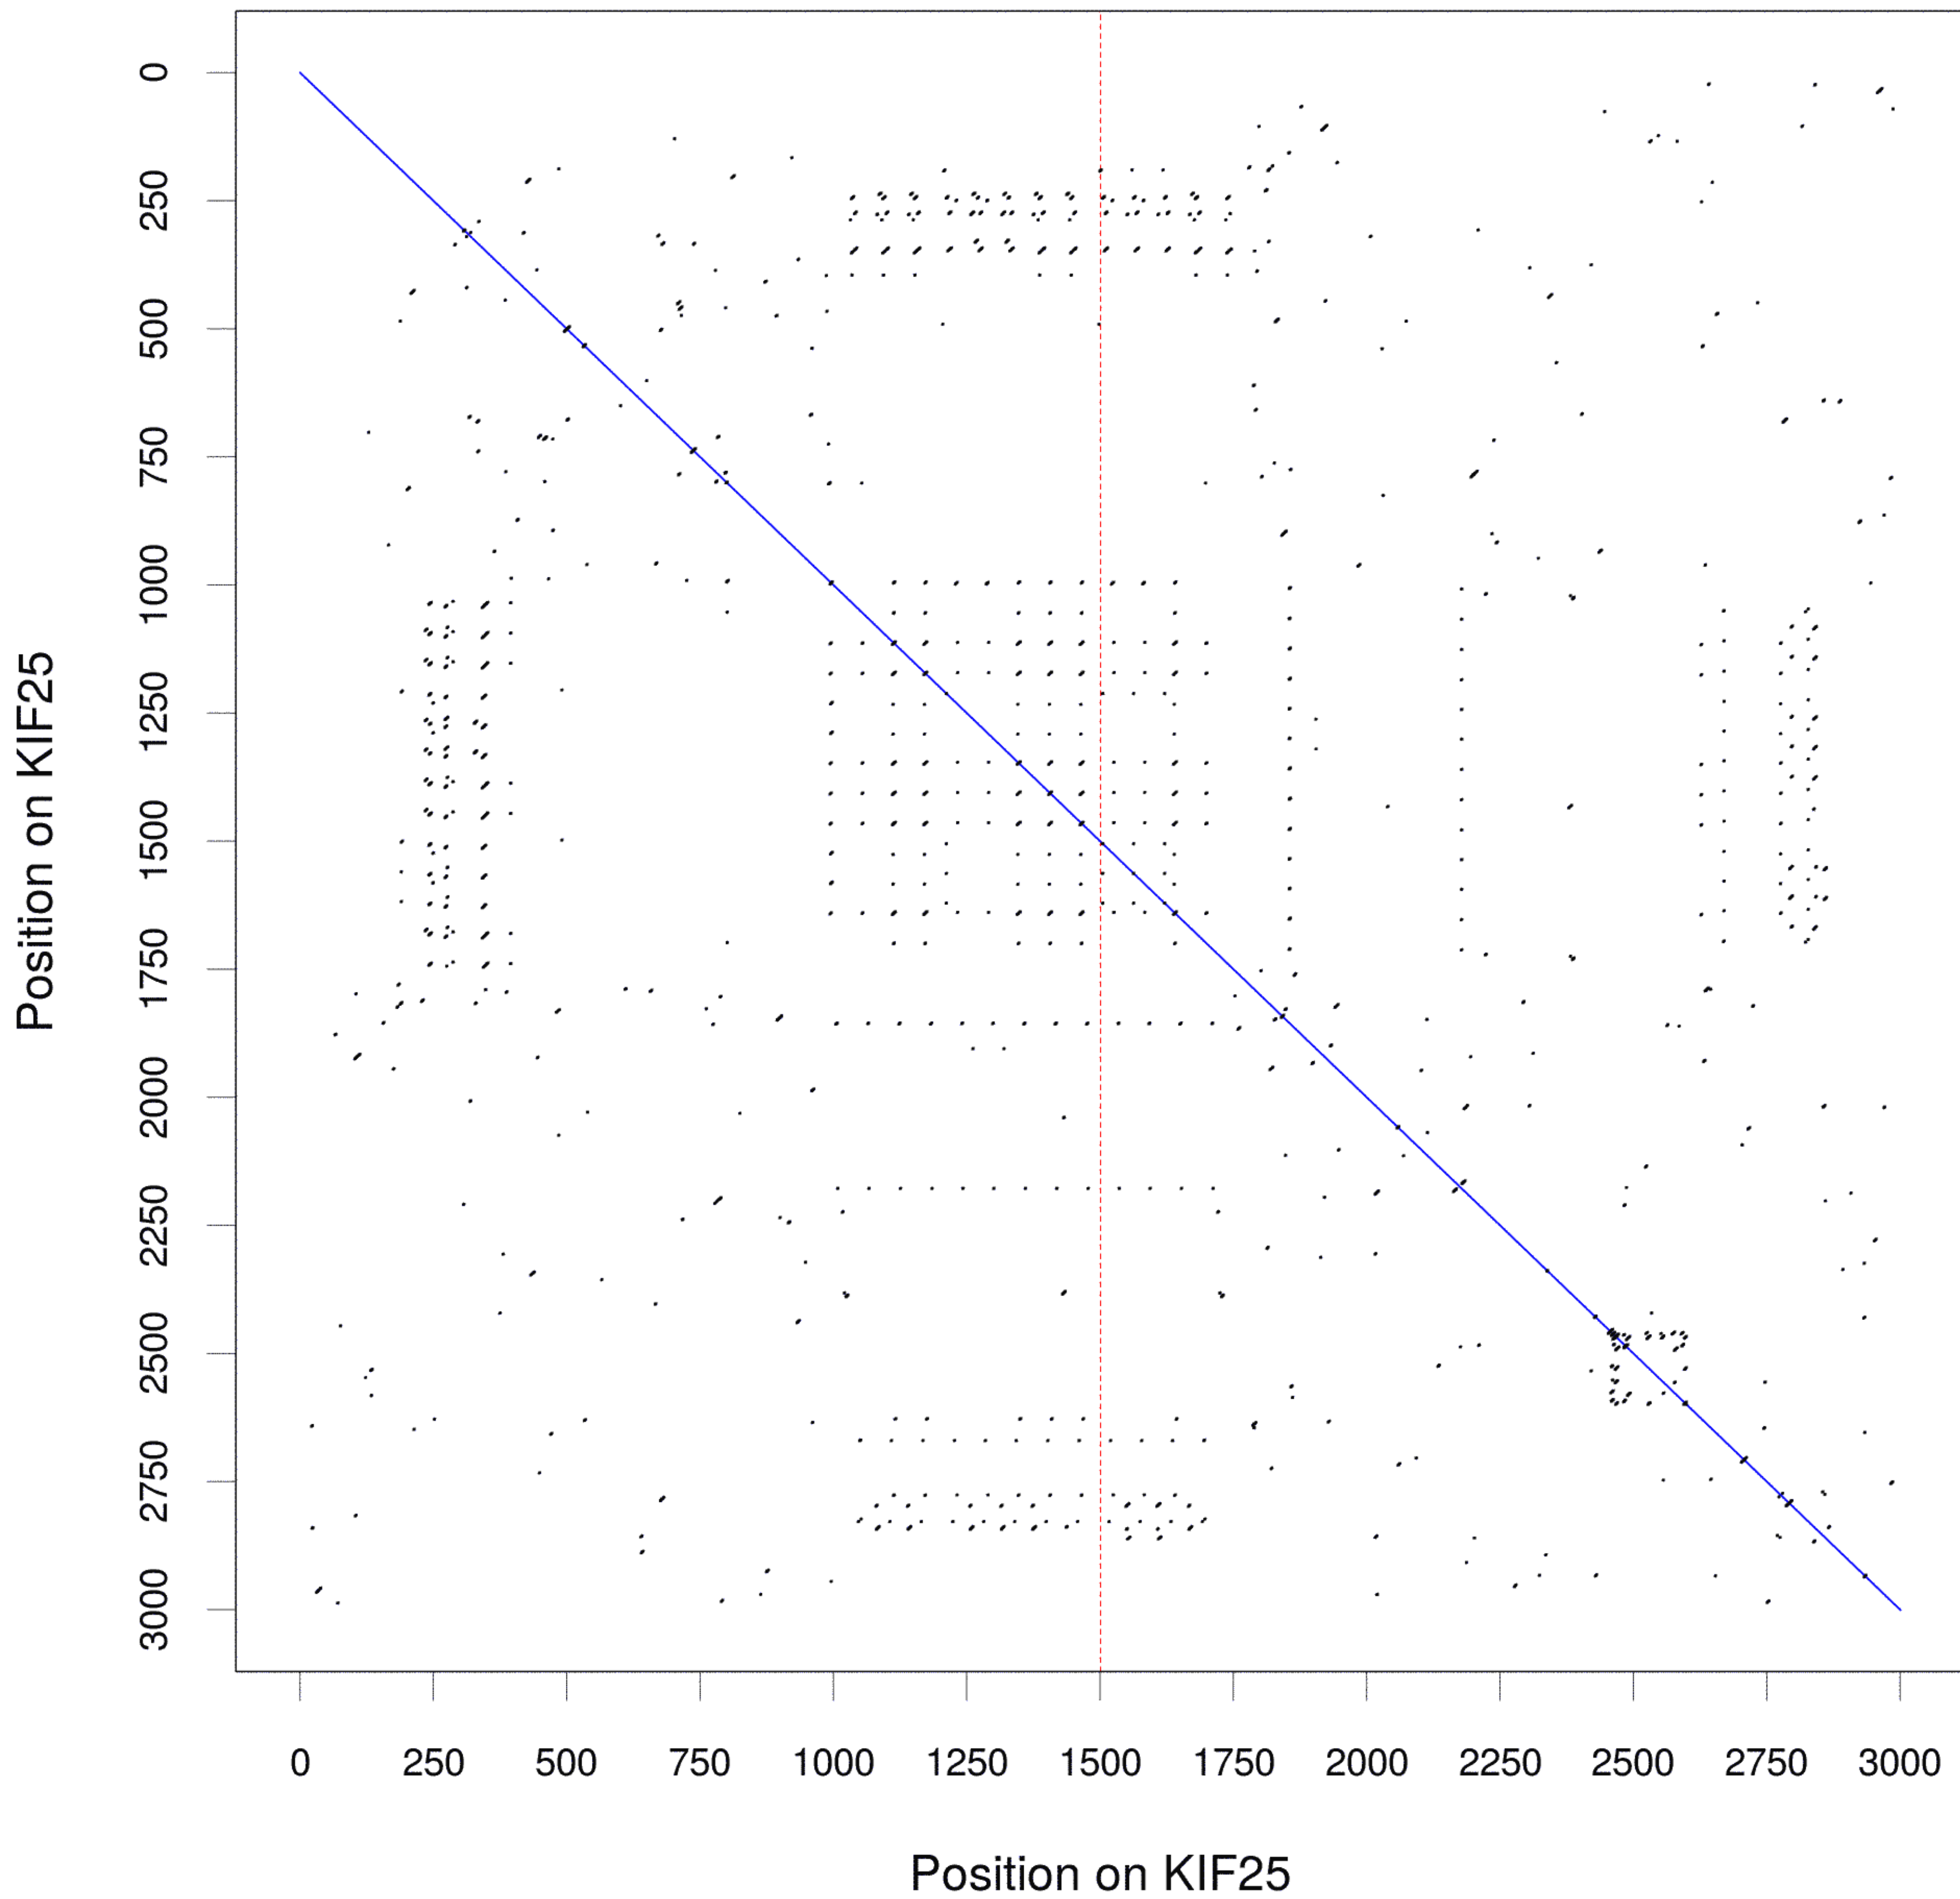

# KIN

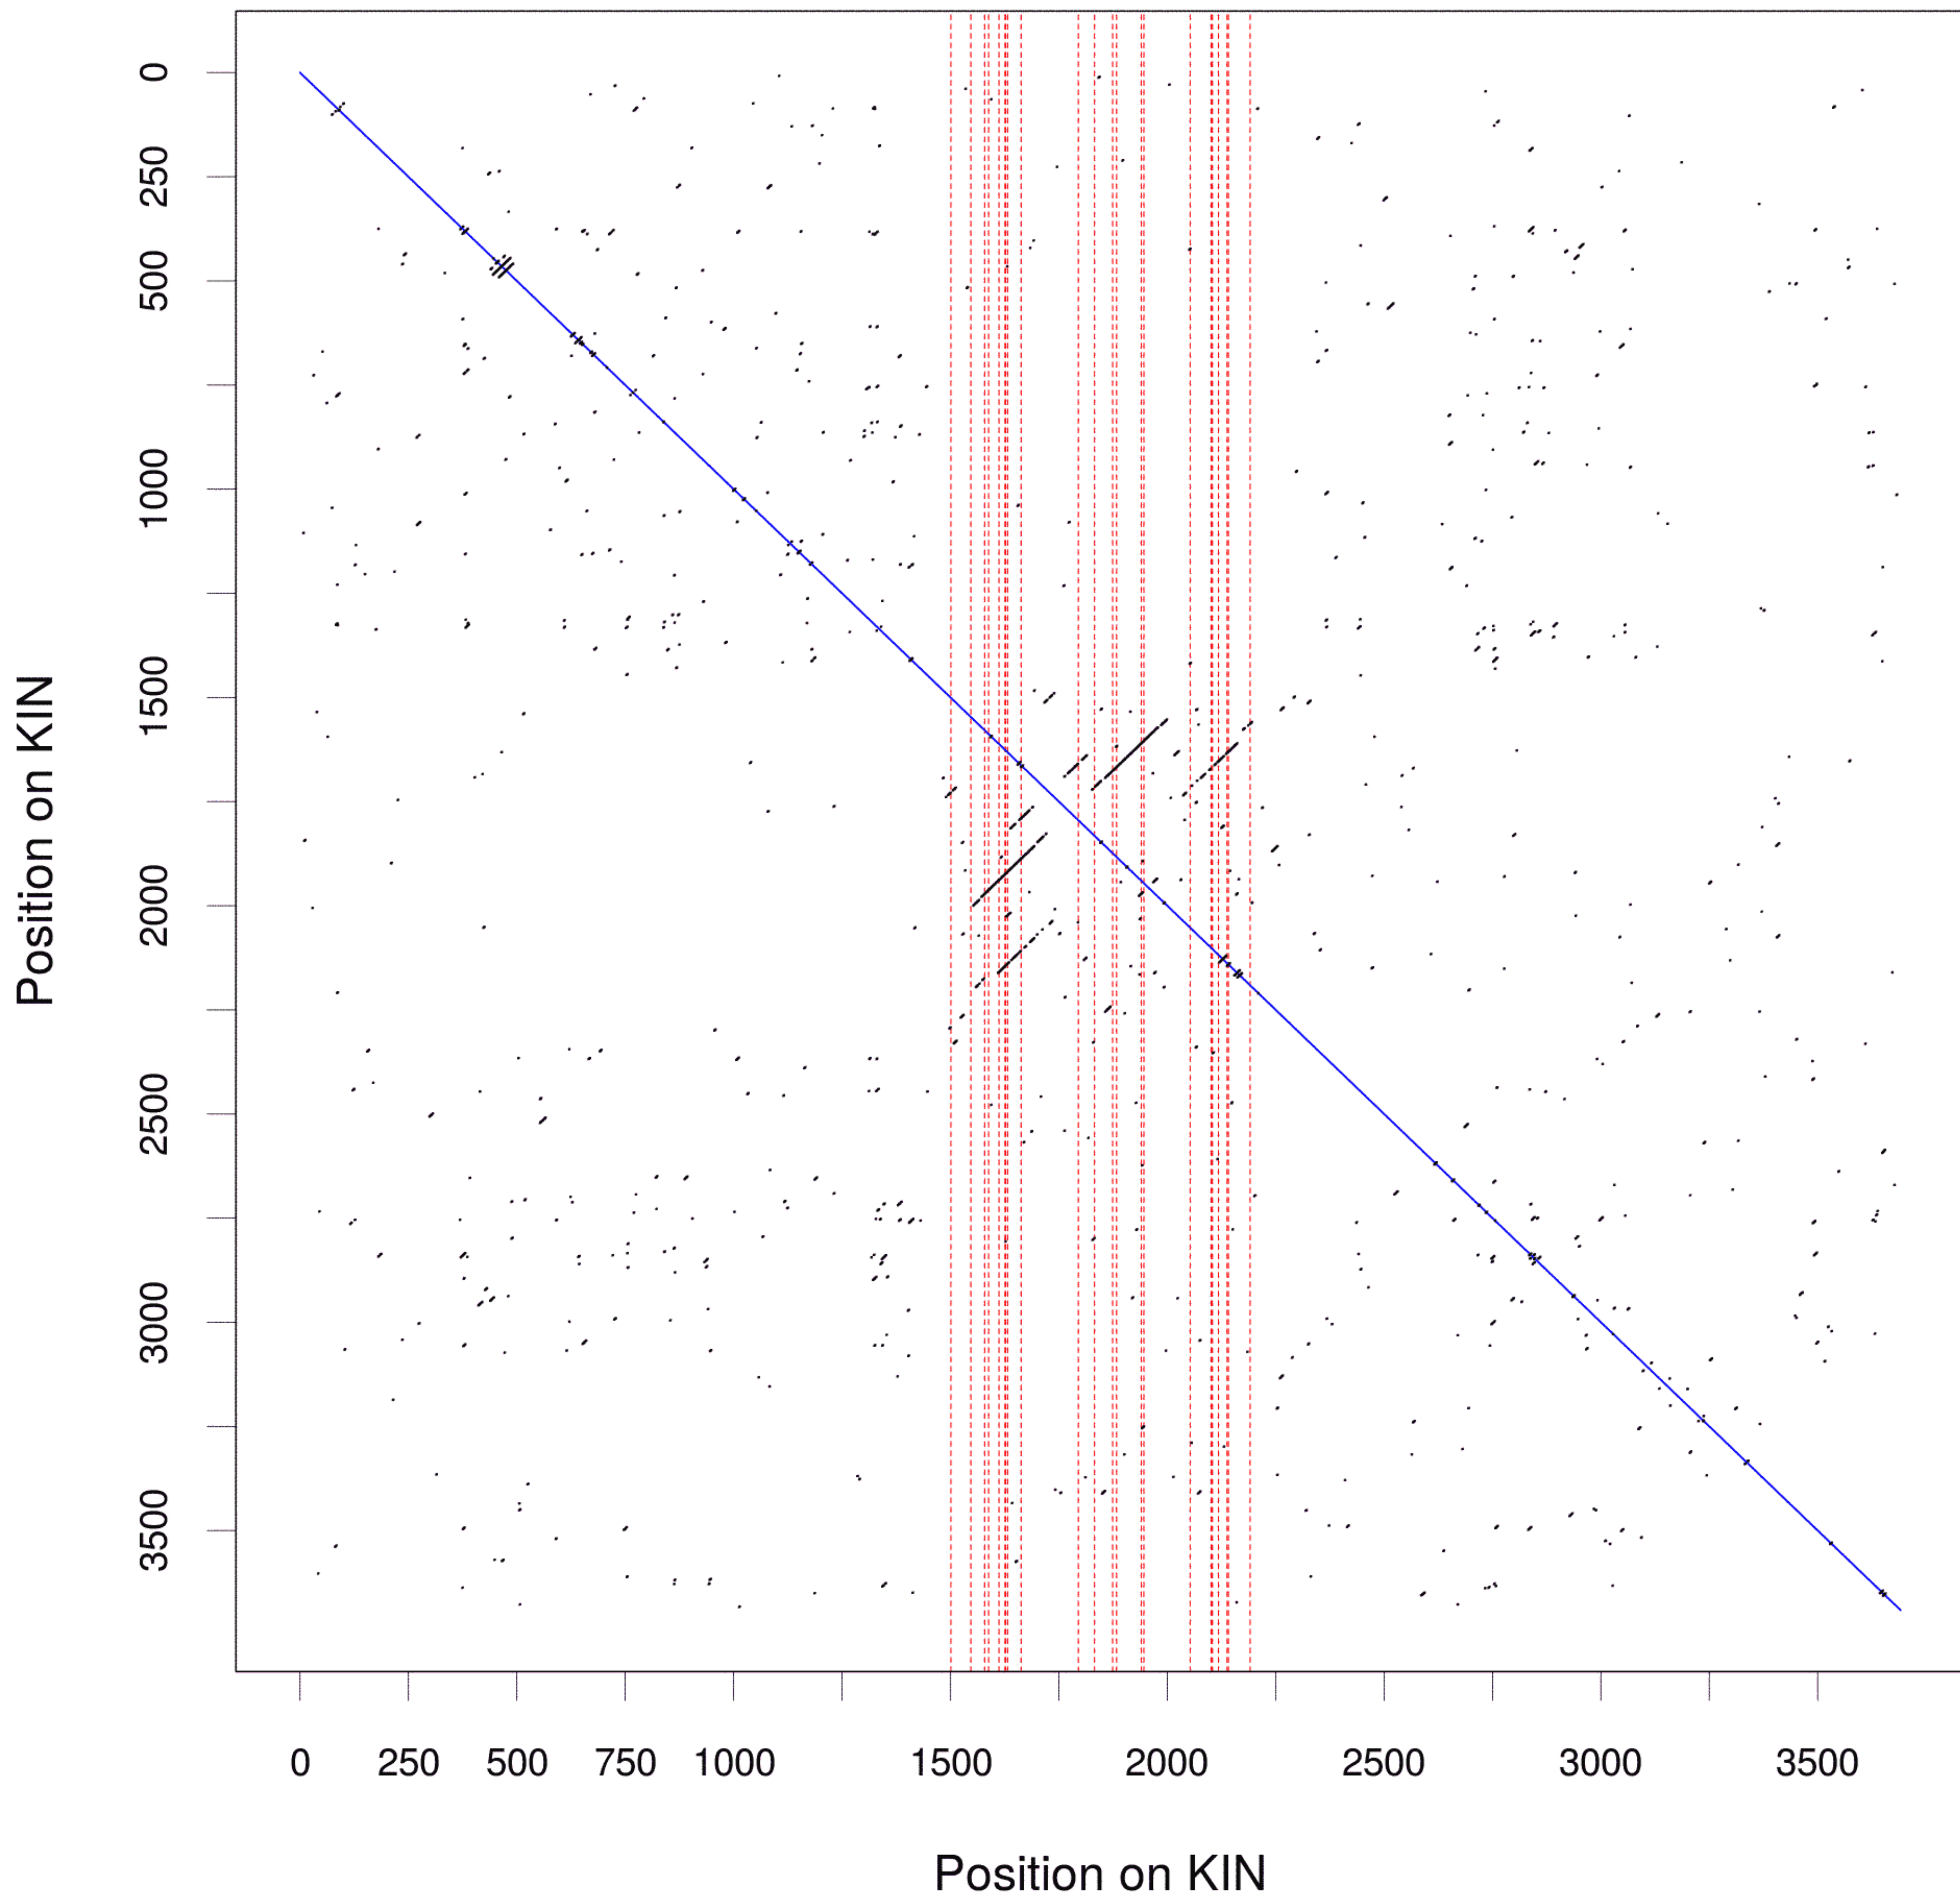

# KRT15

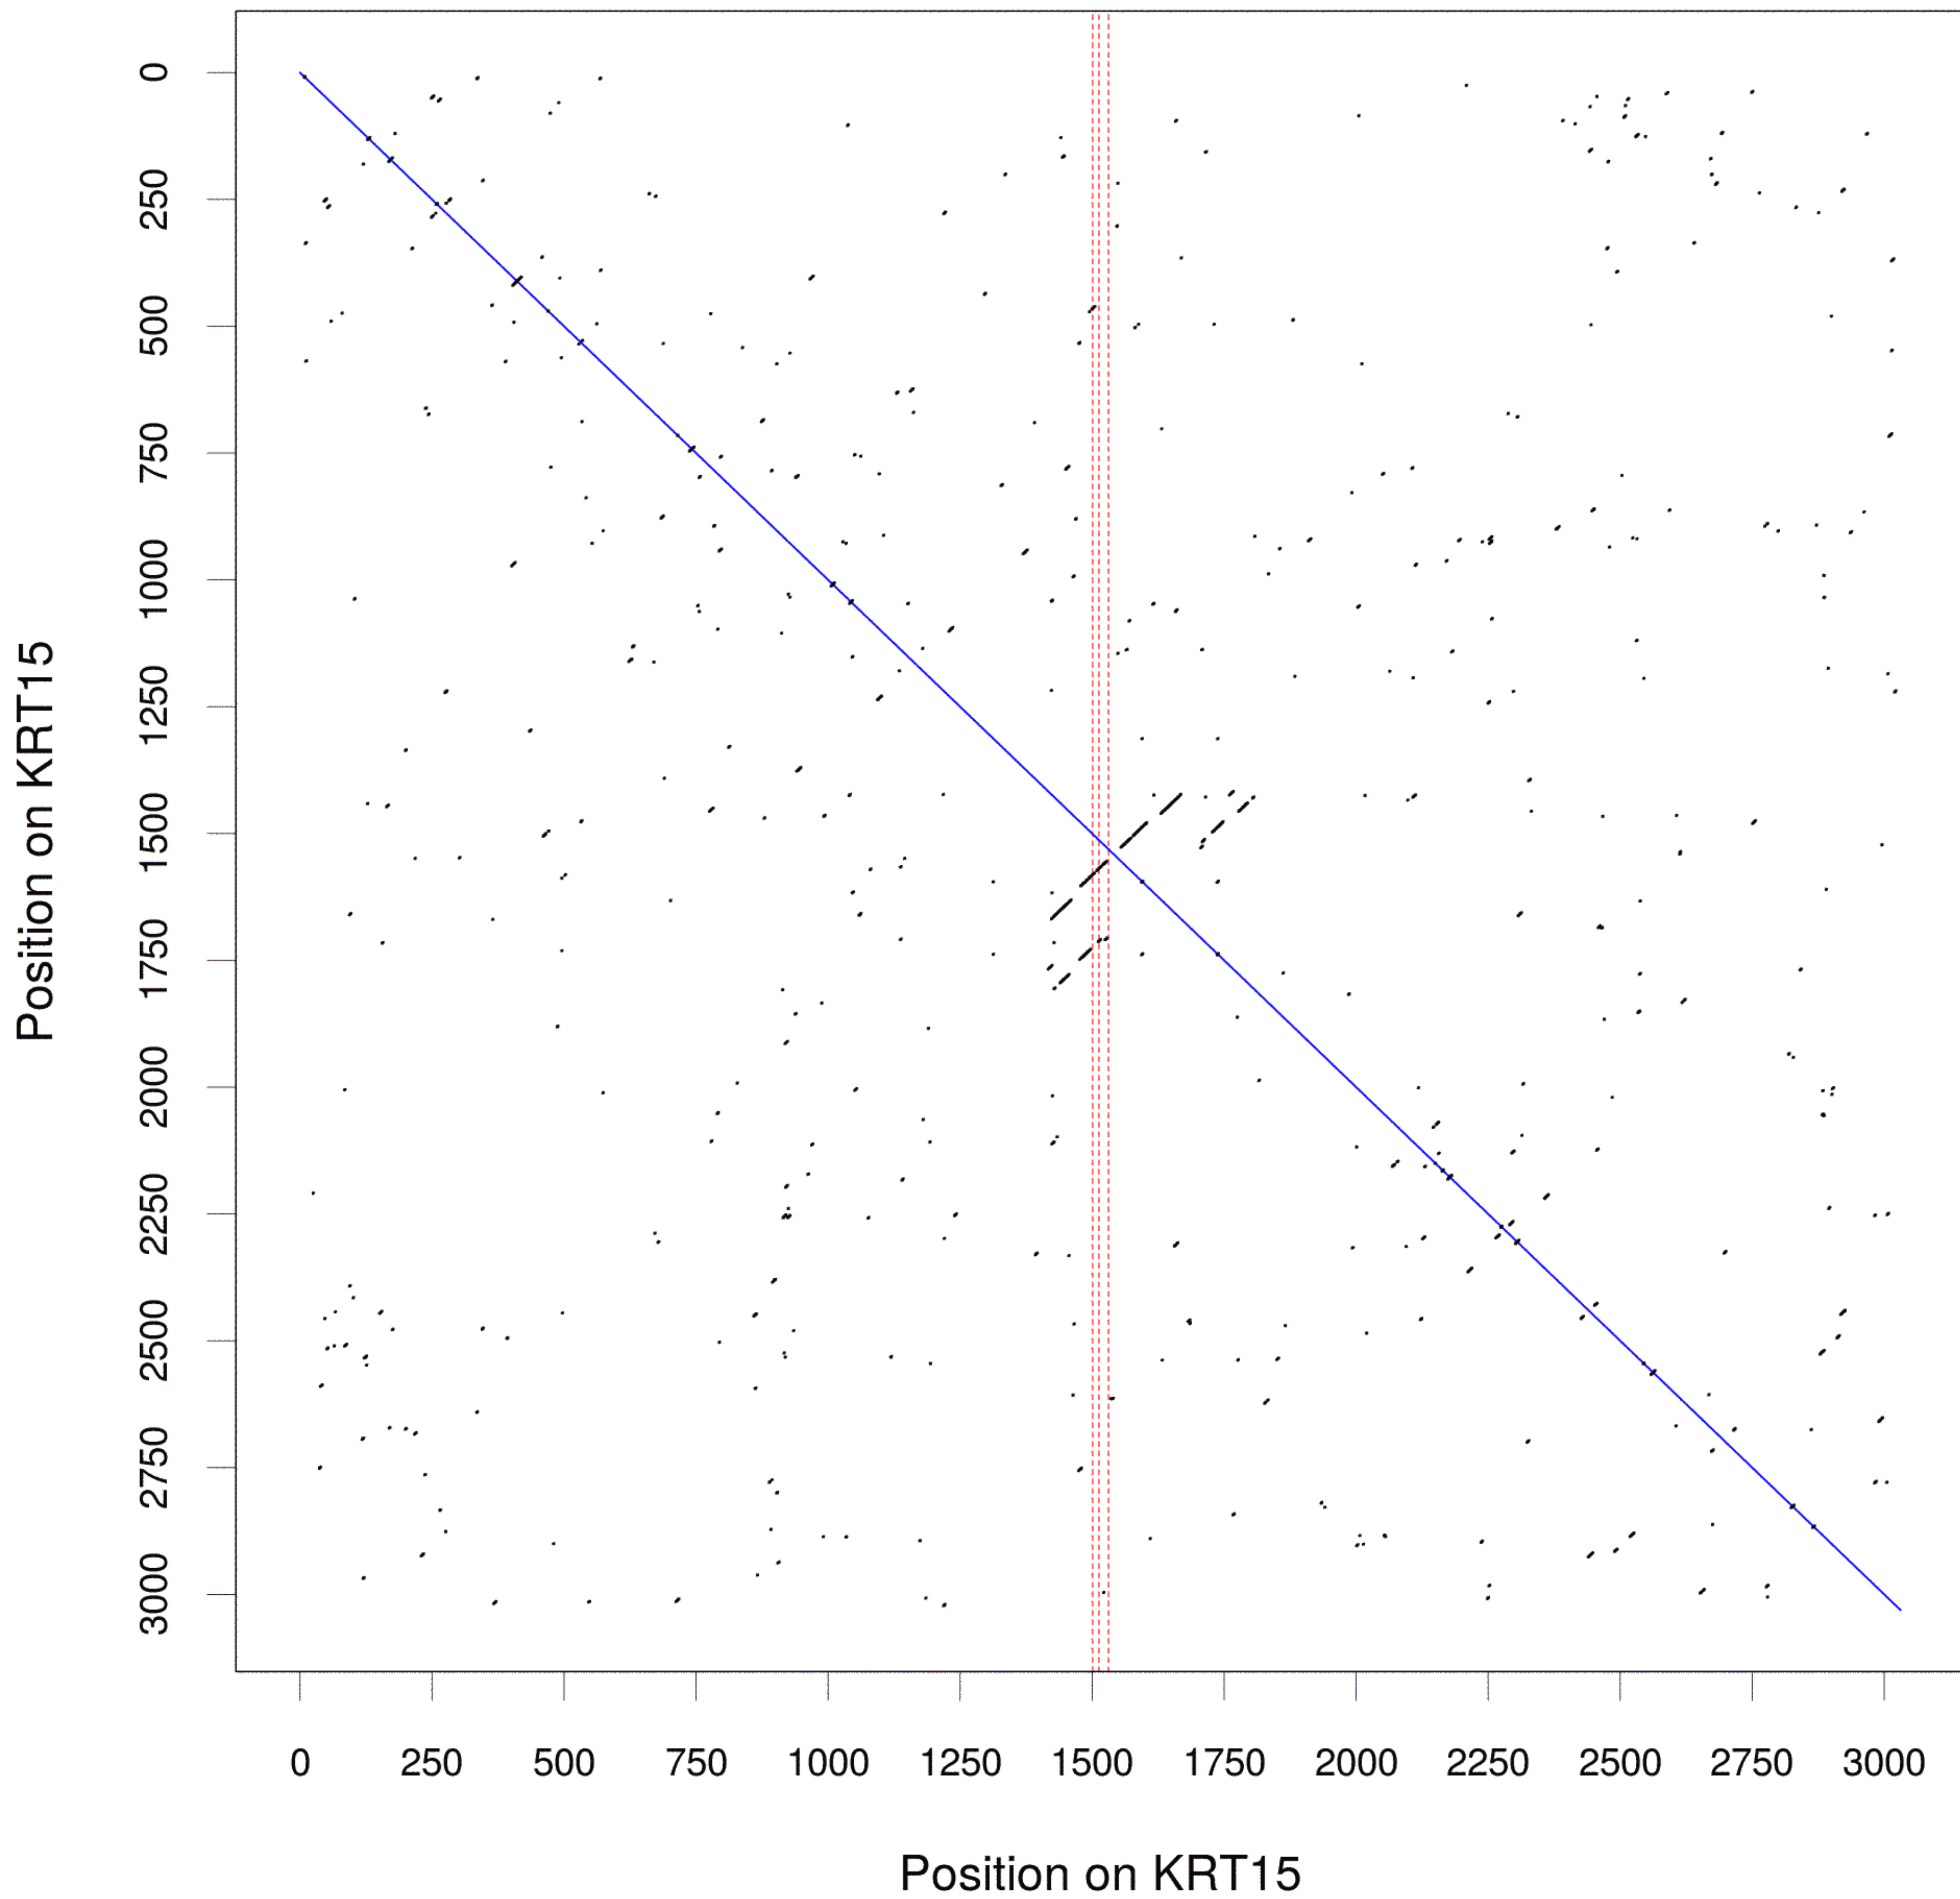



# LMAN2L

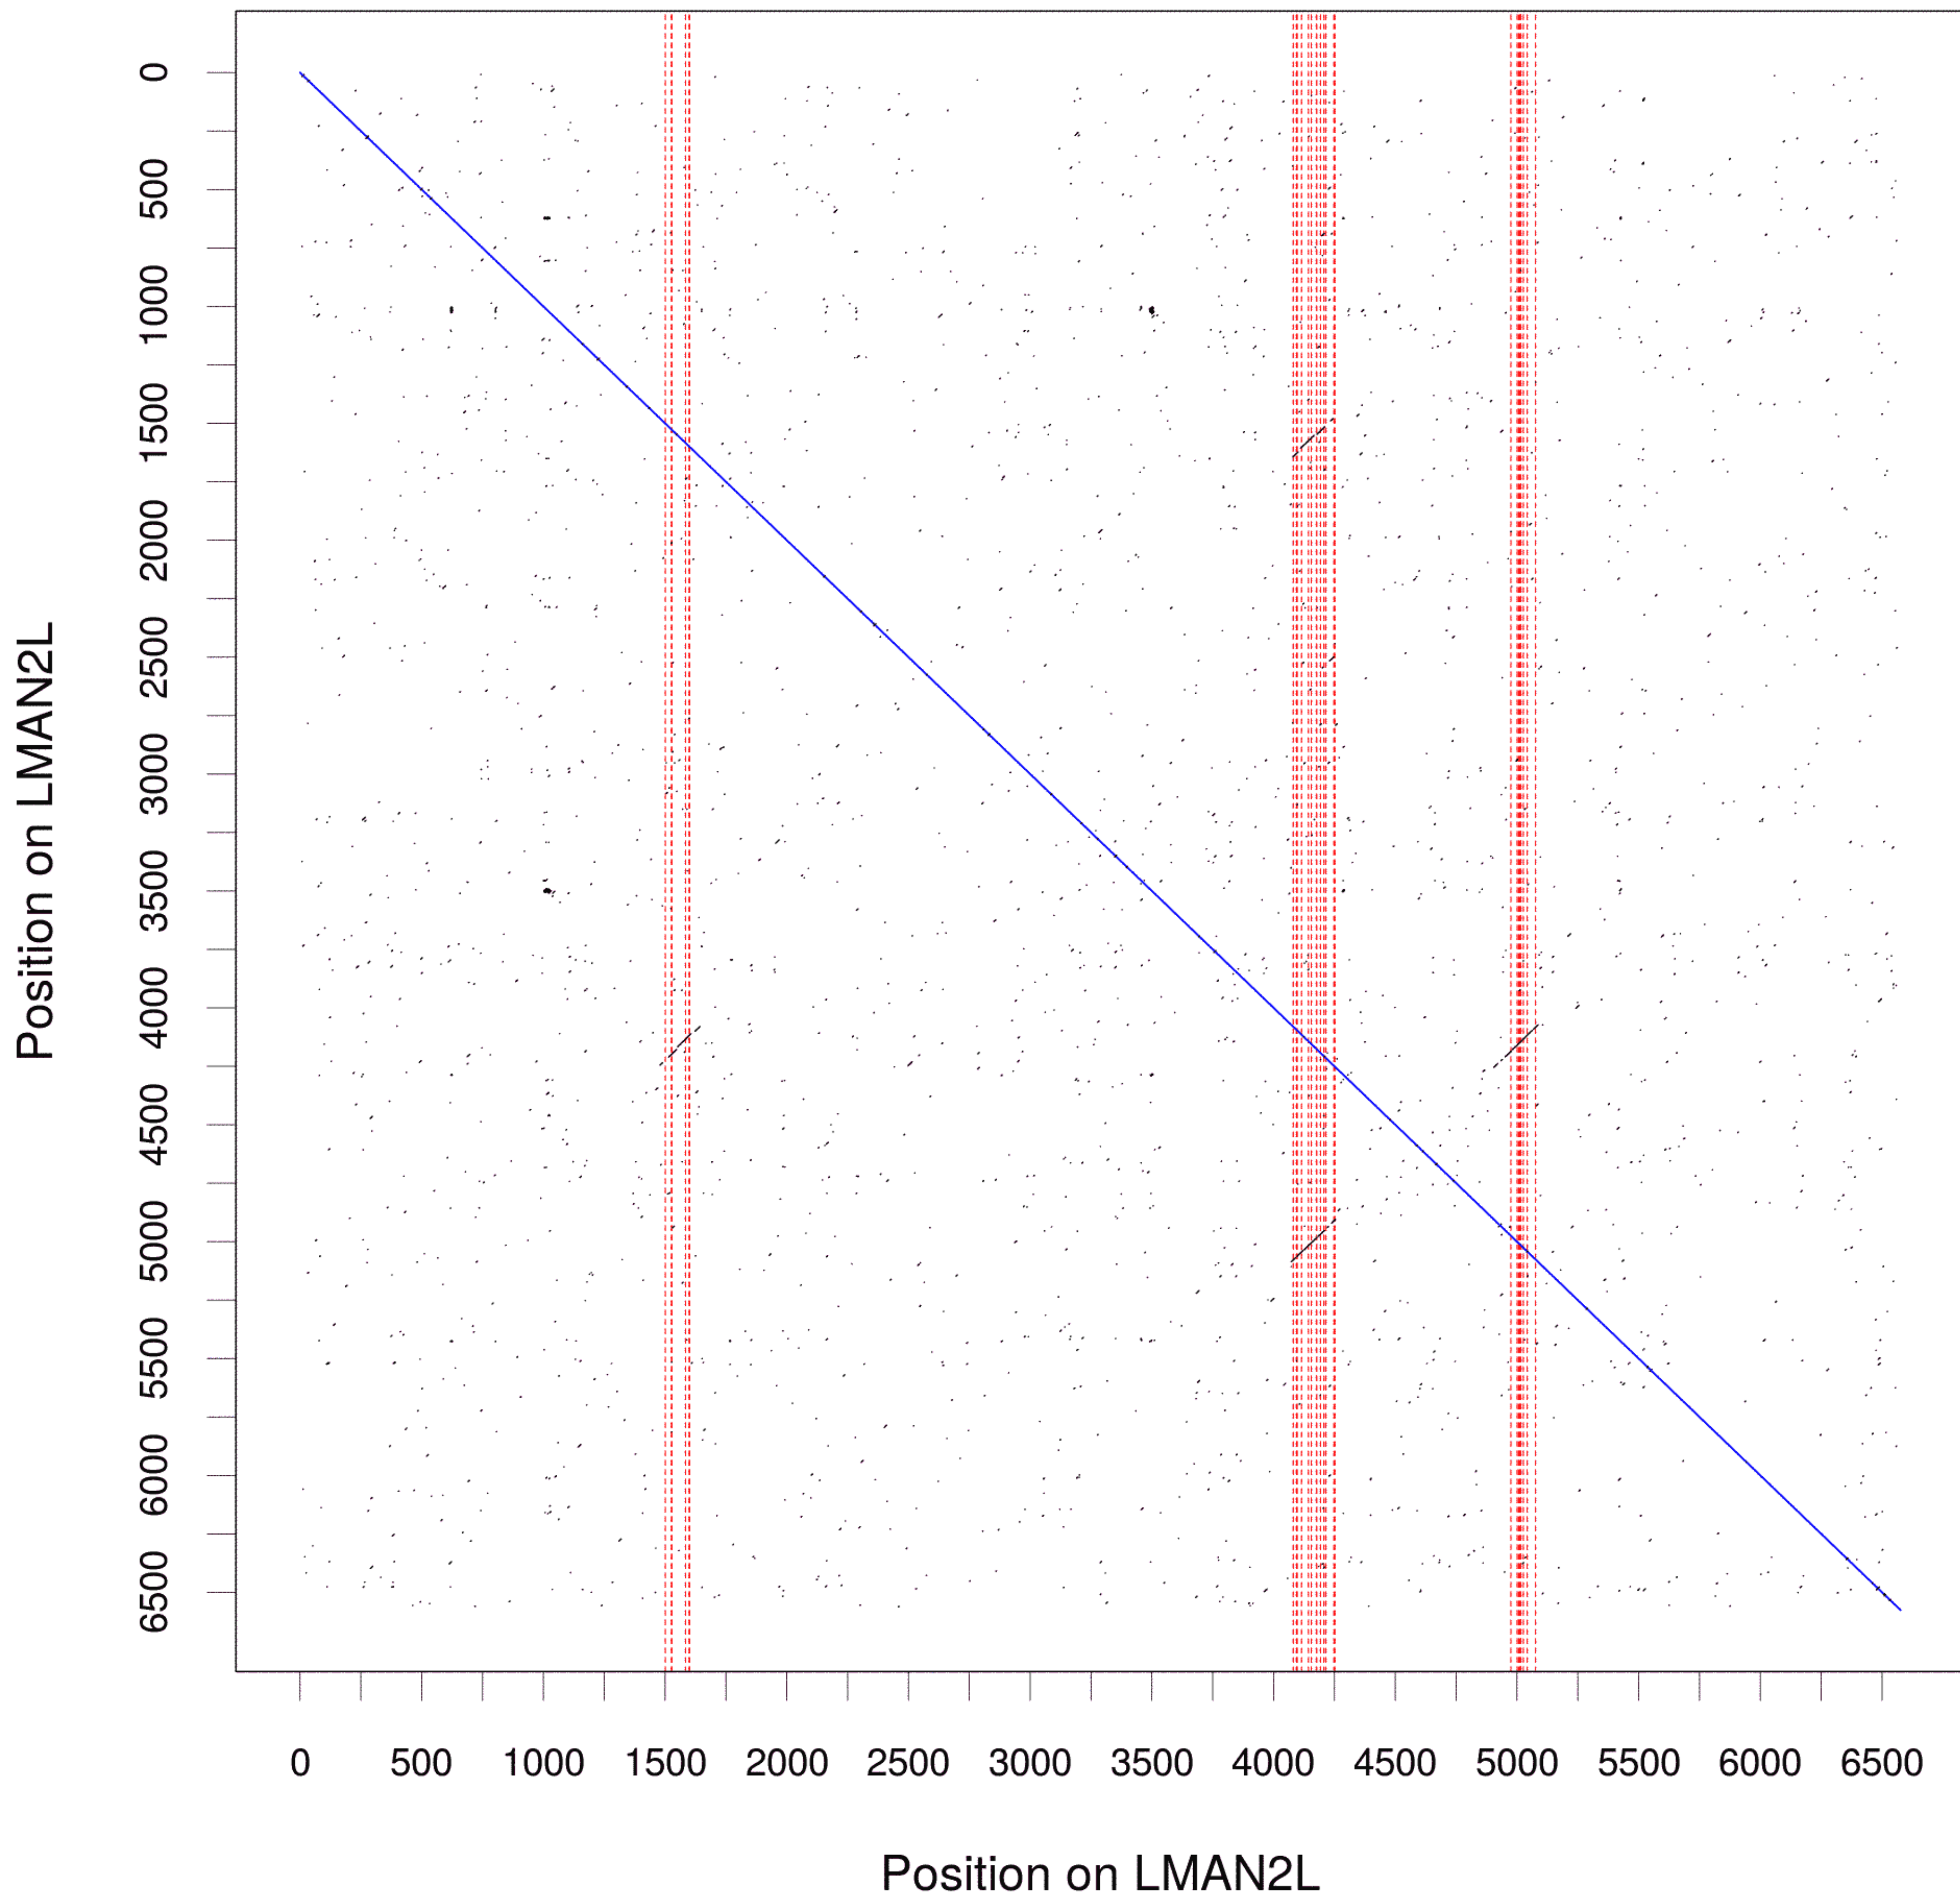

# LMBRD2

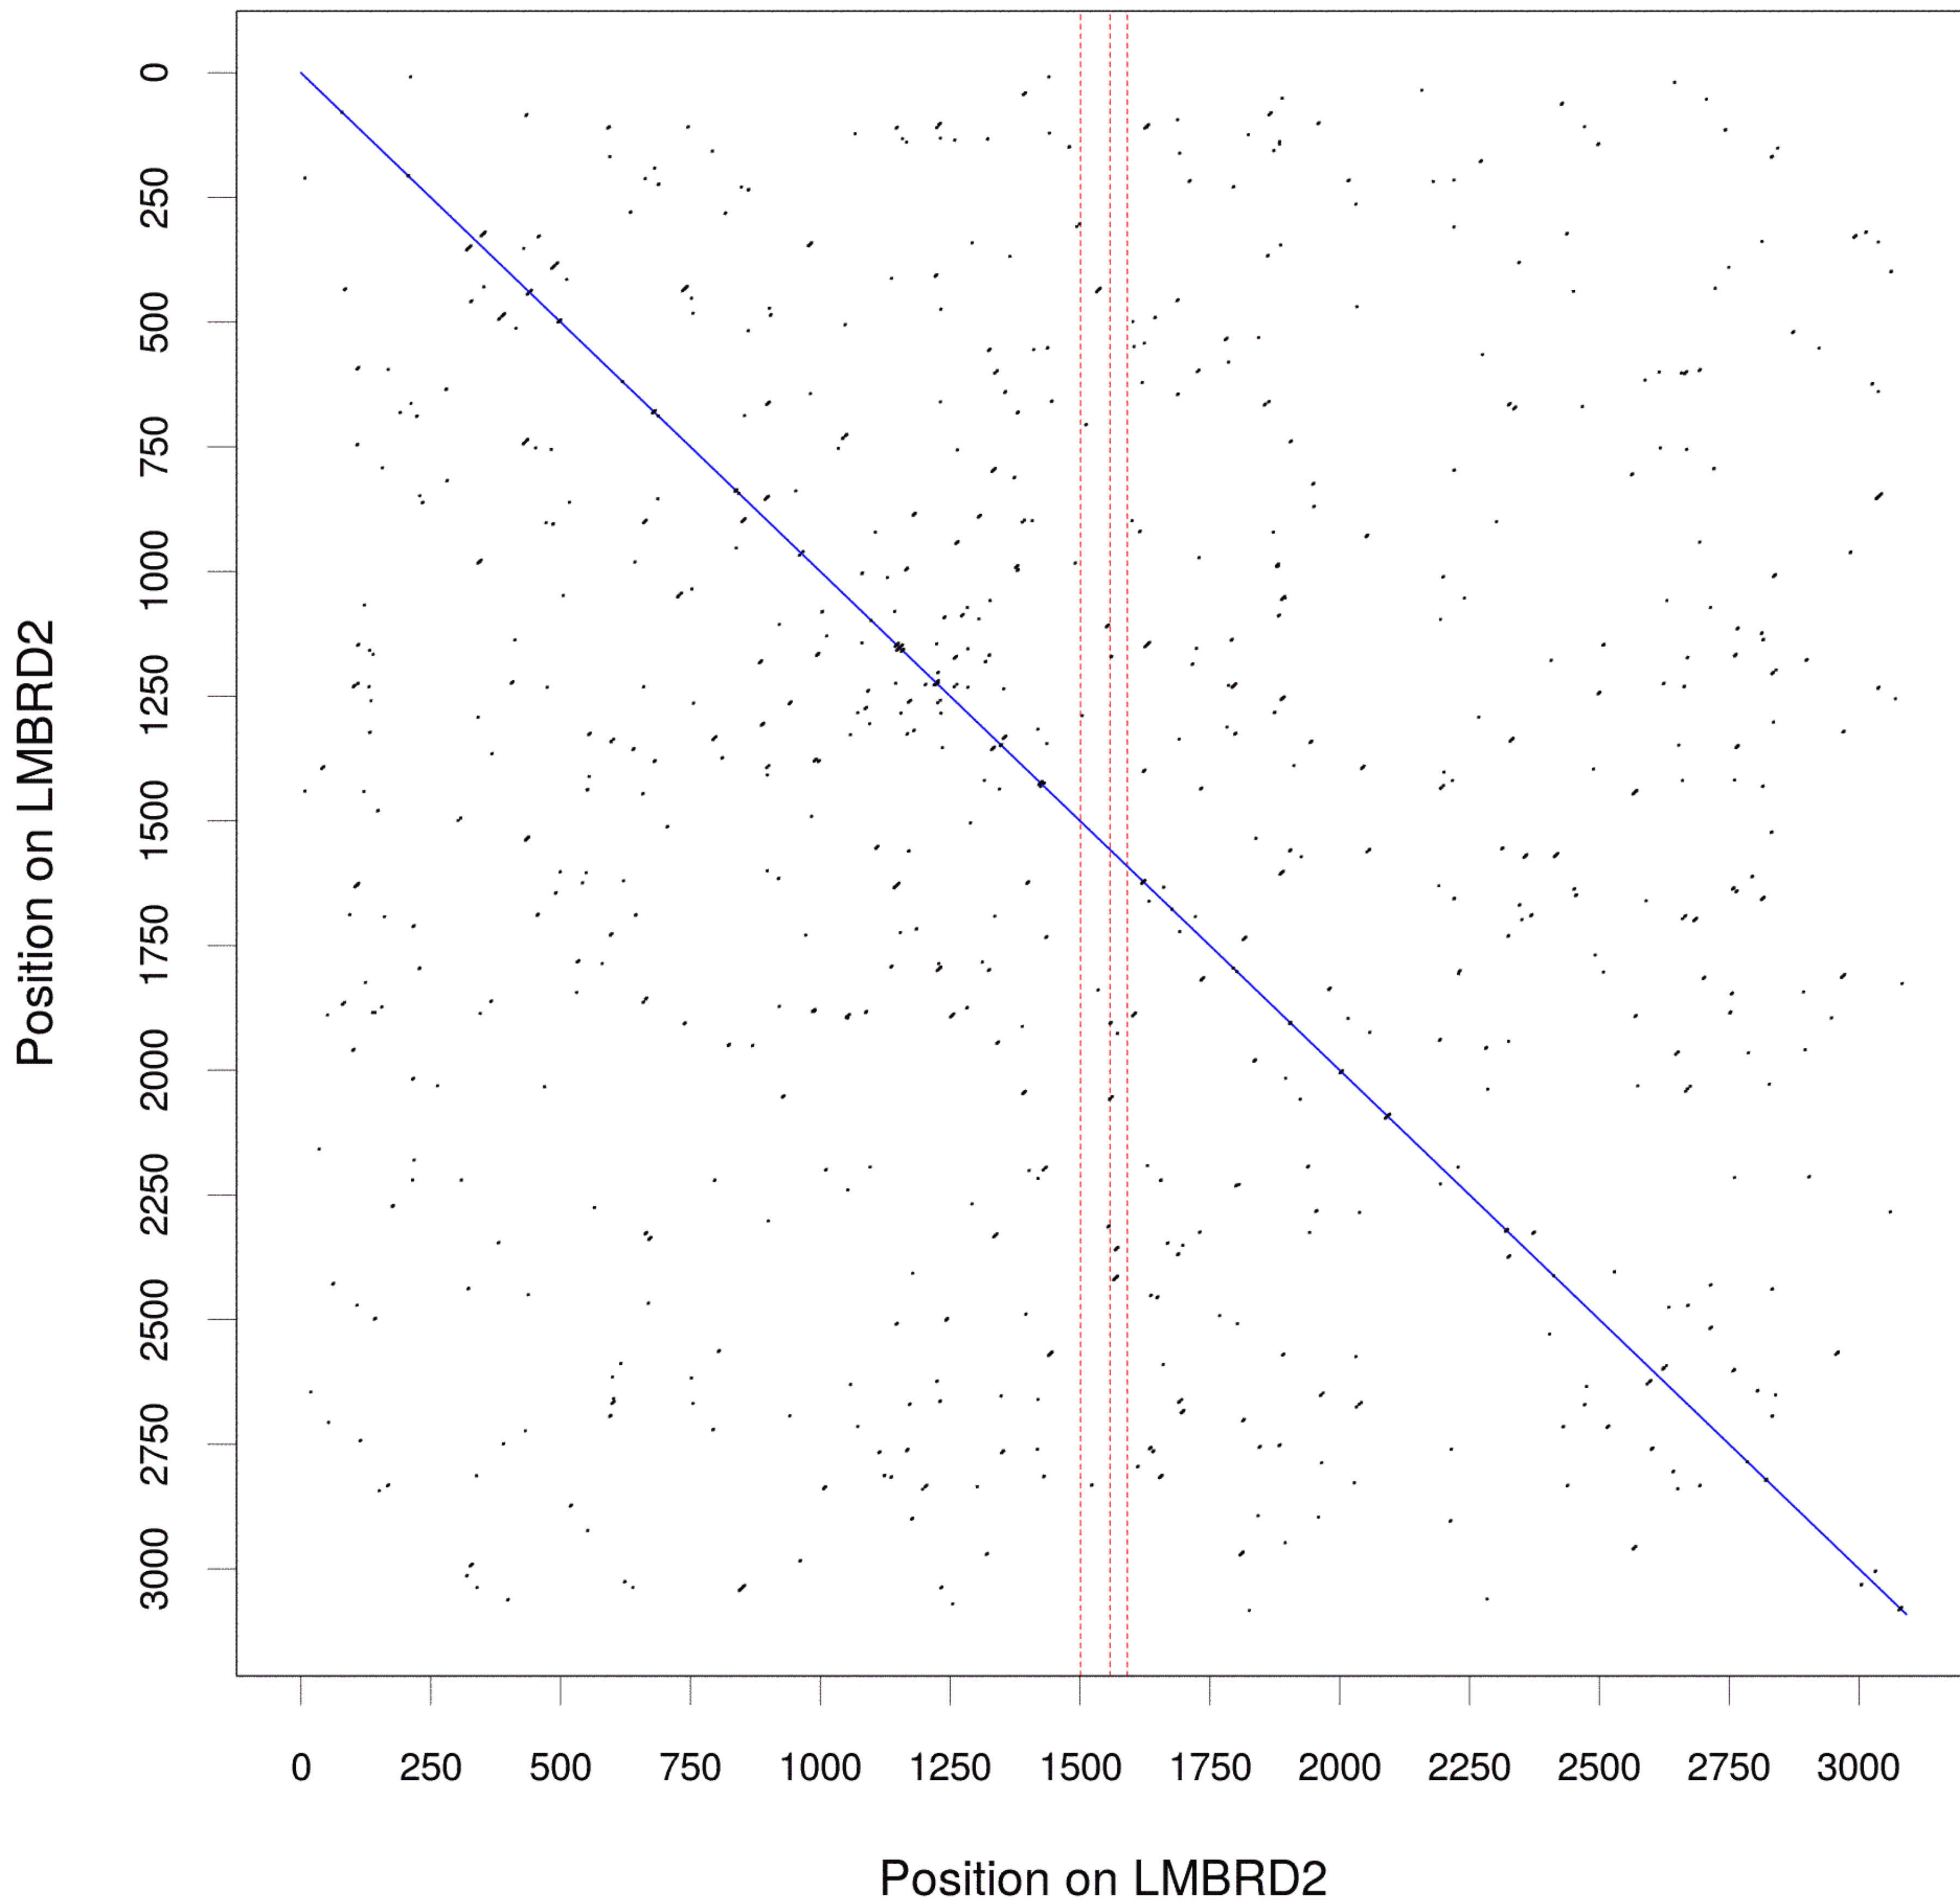

# LOC515042

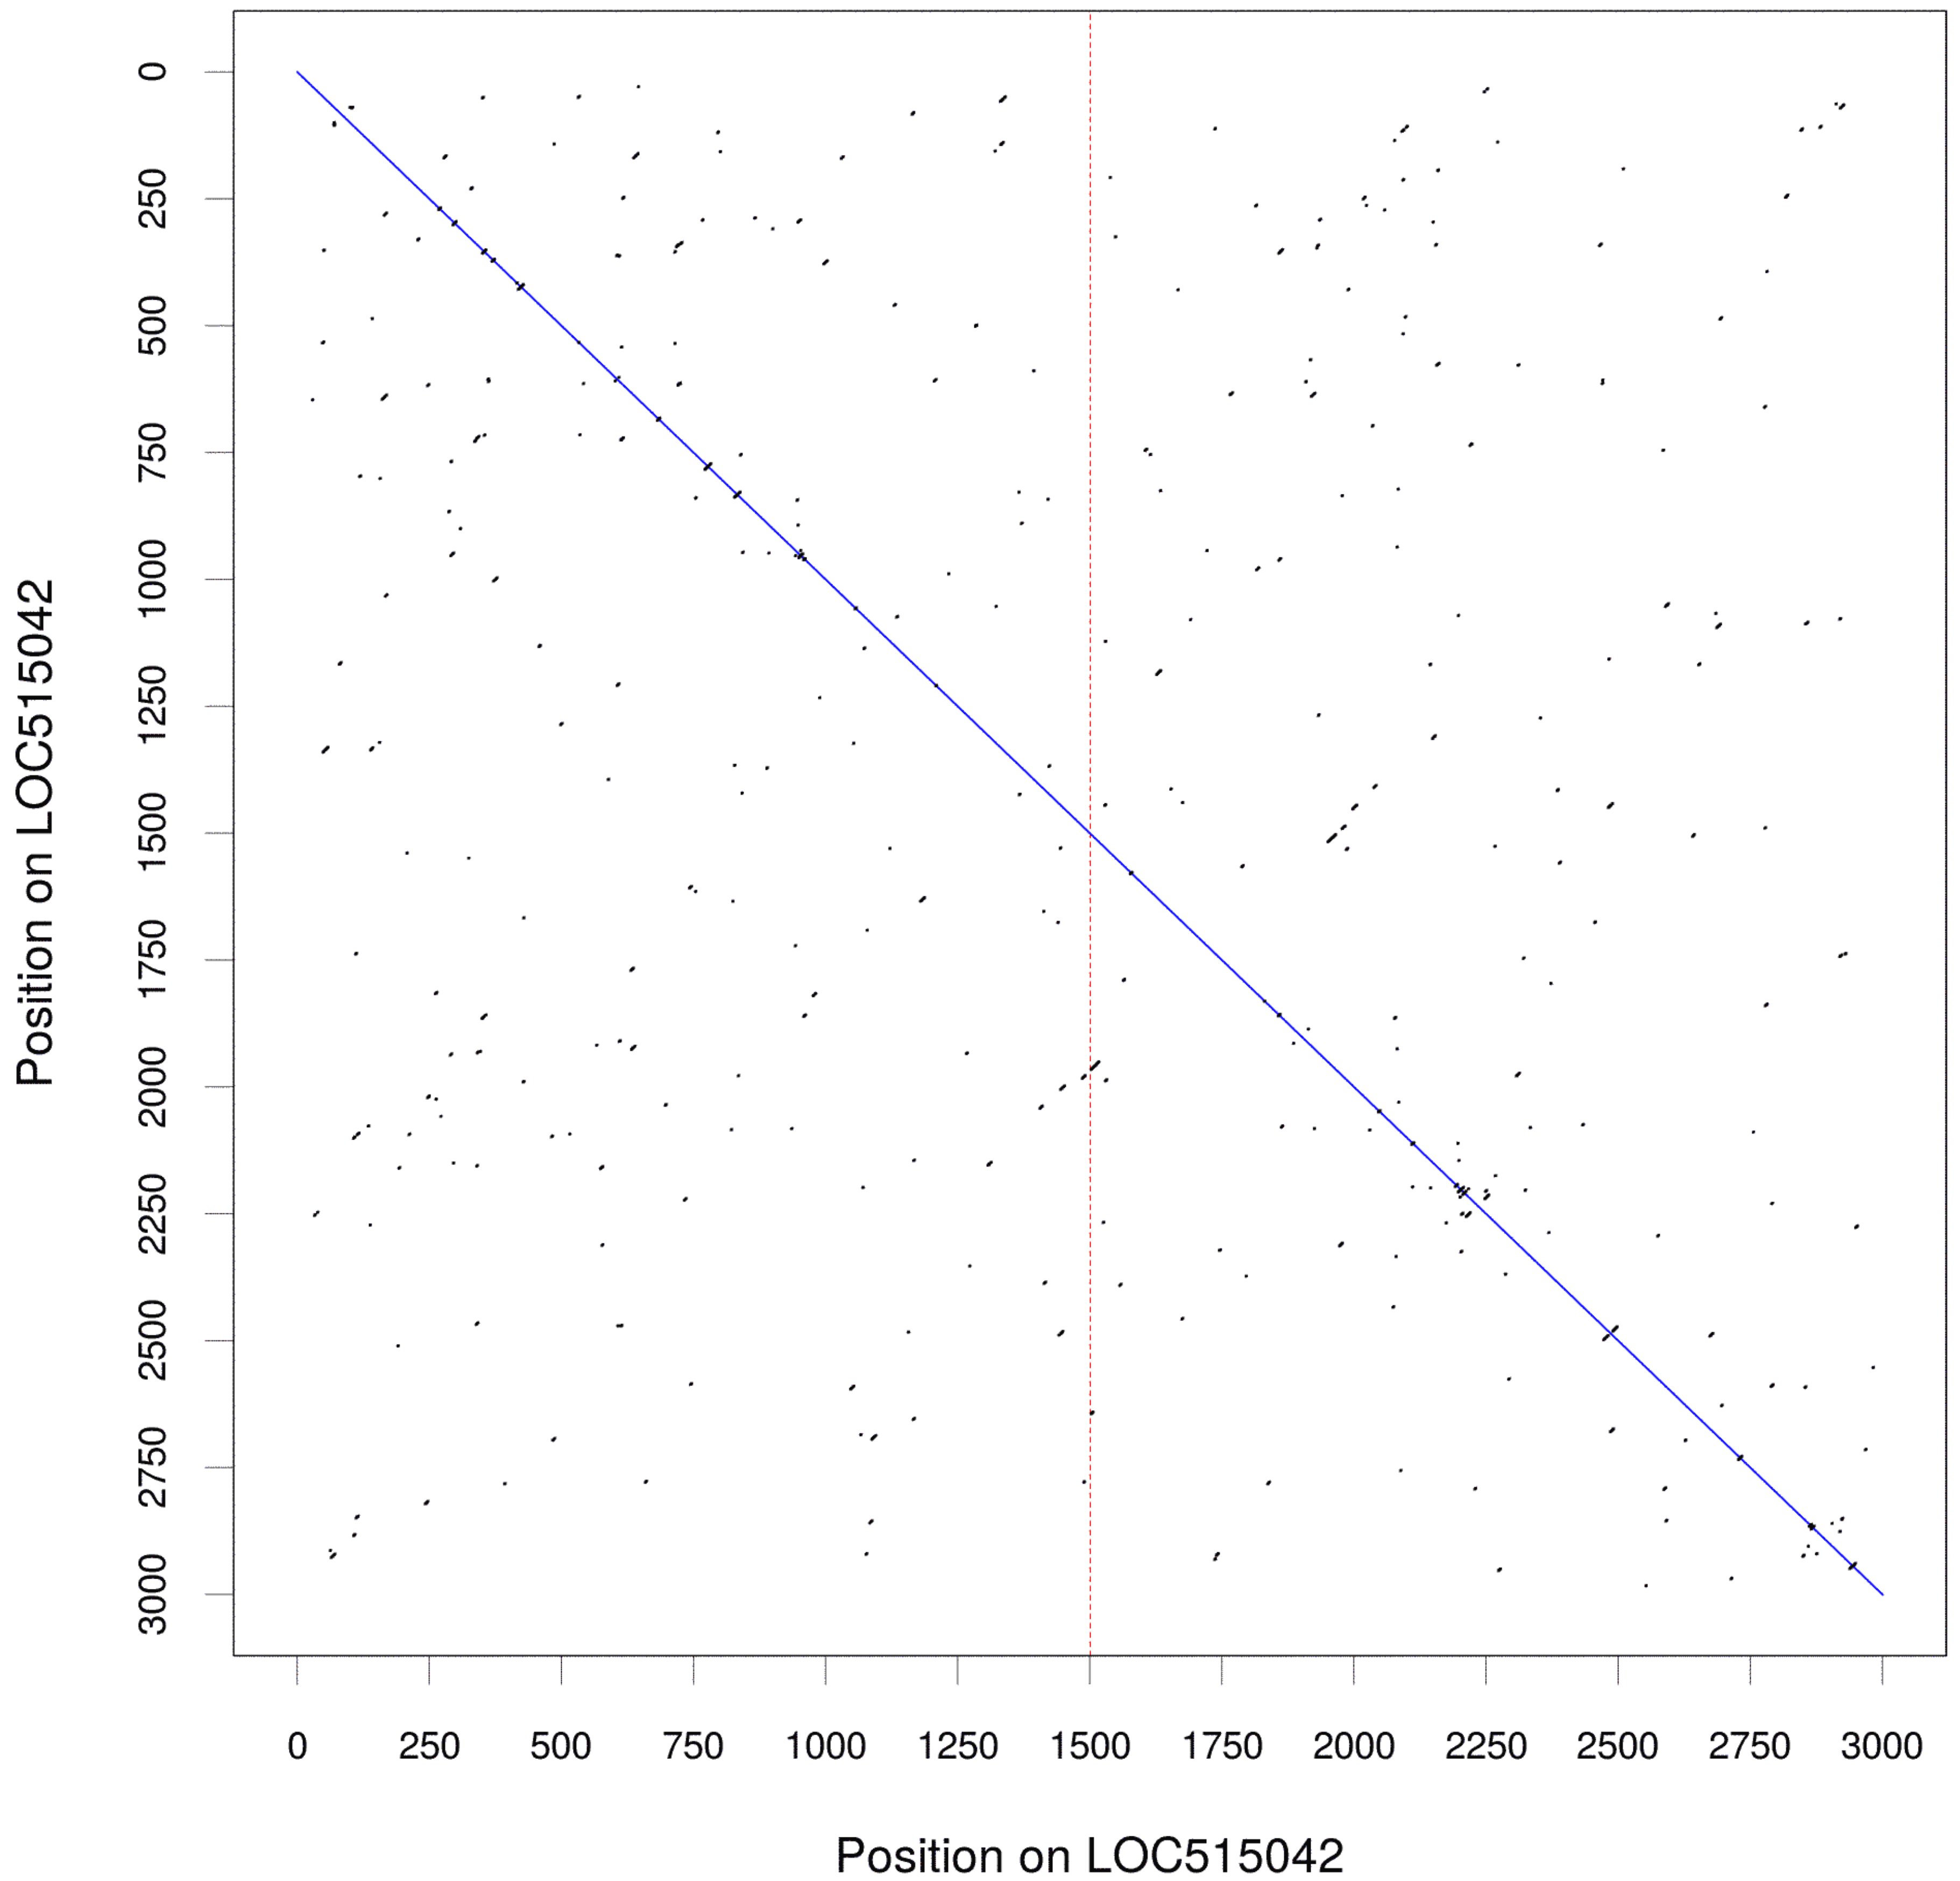

# LPL

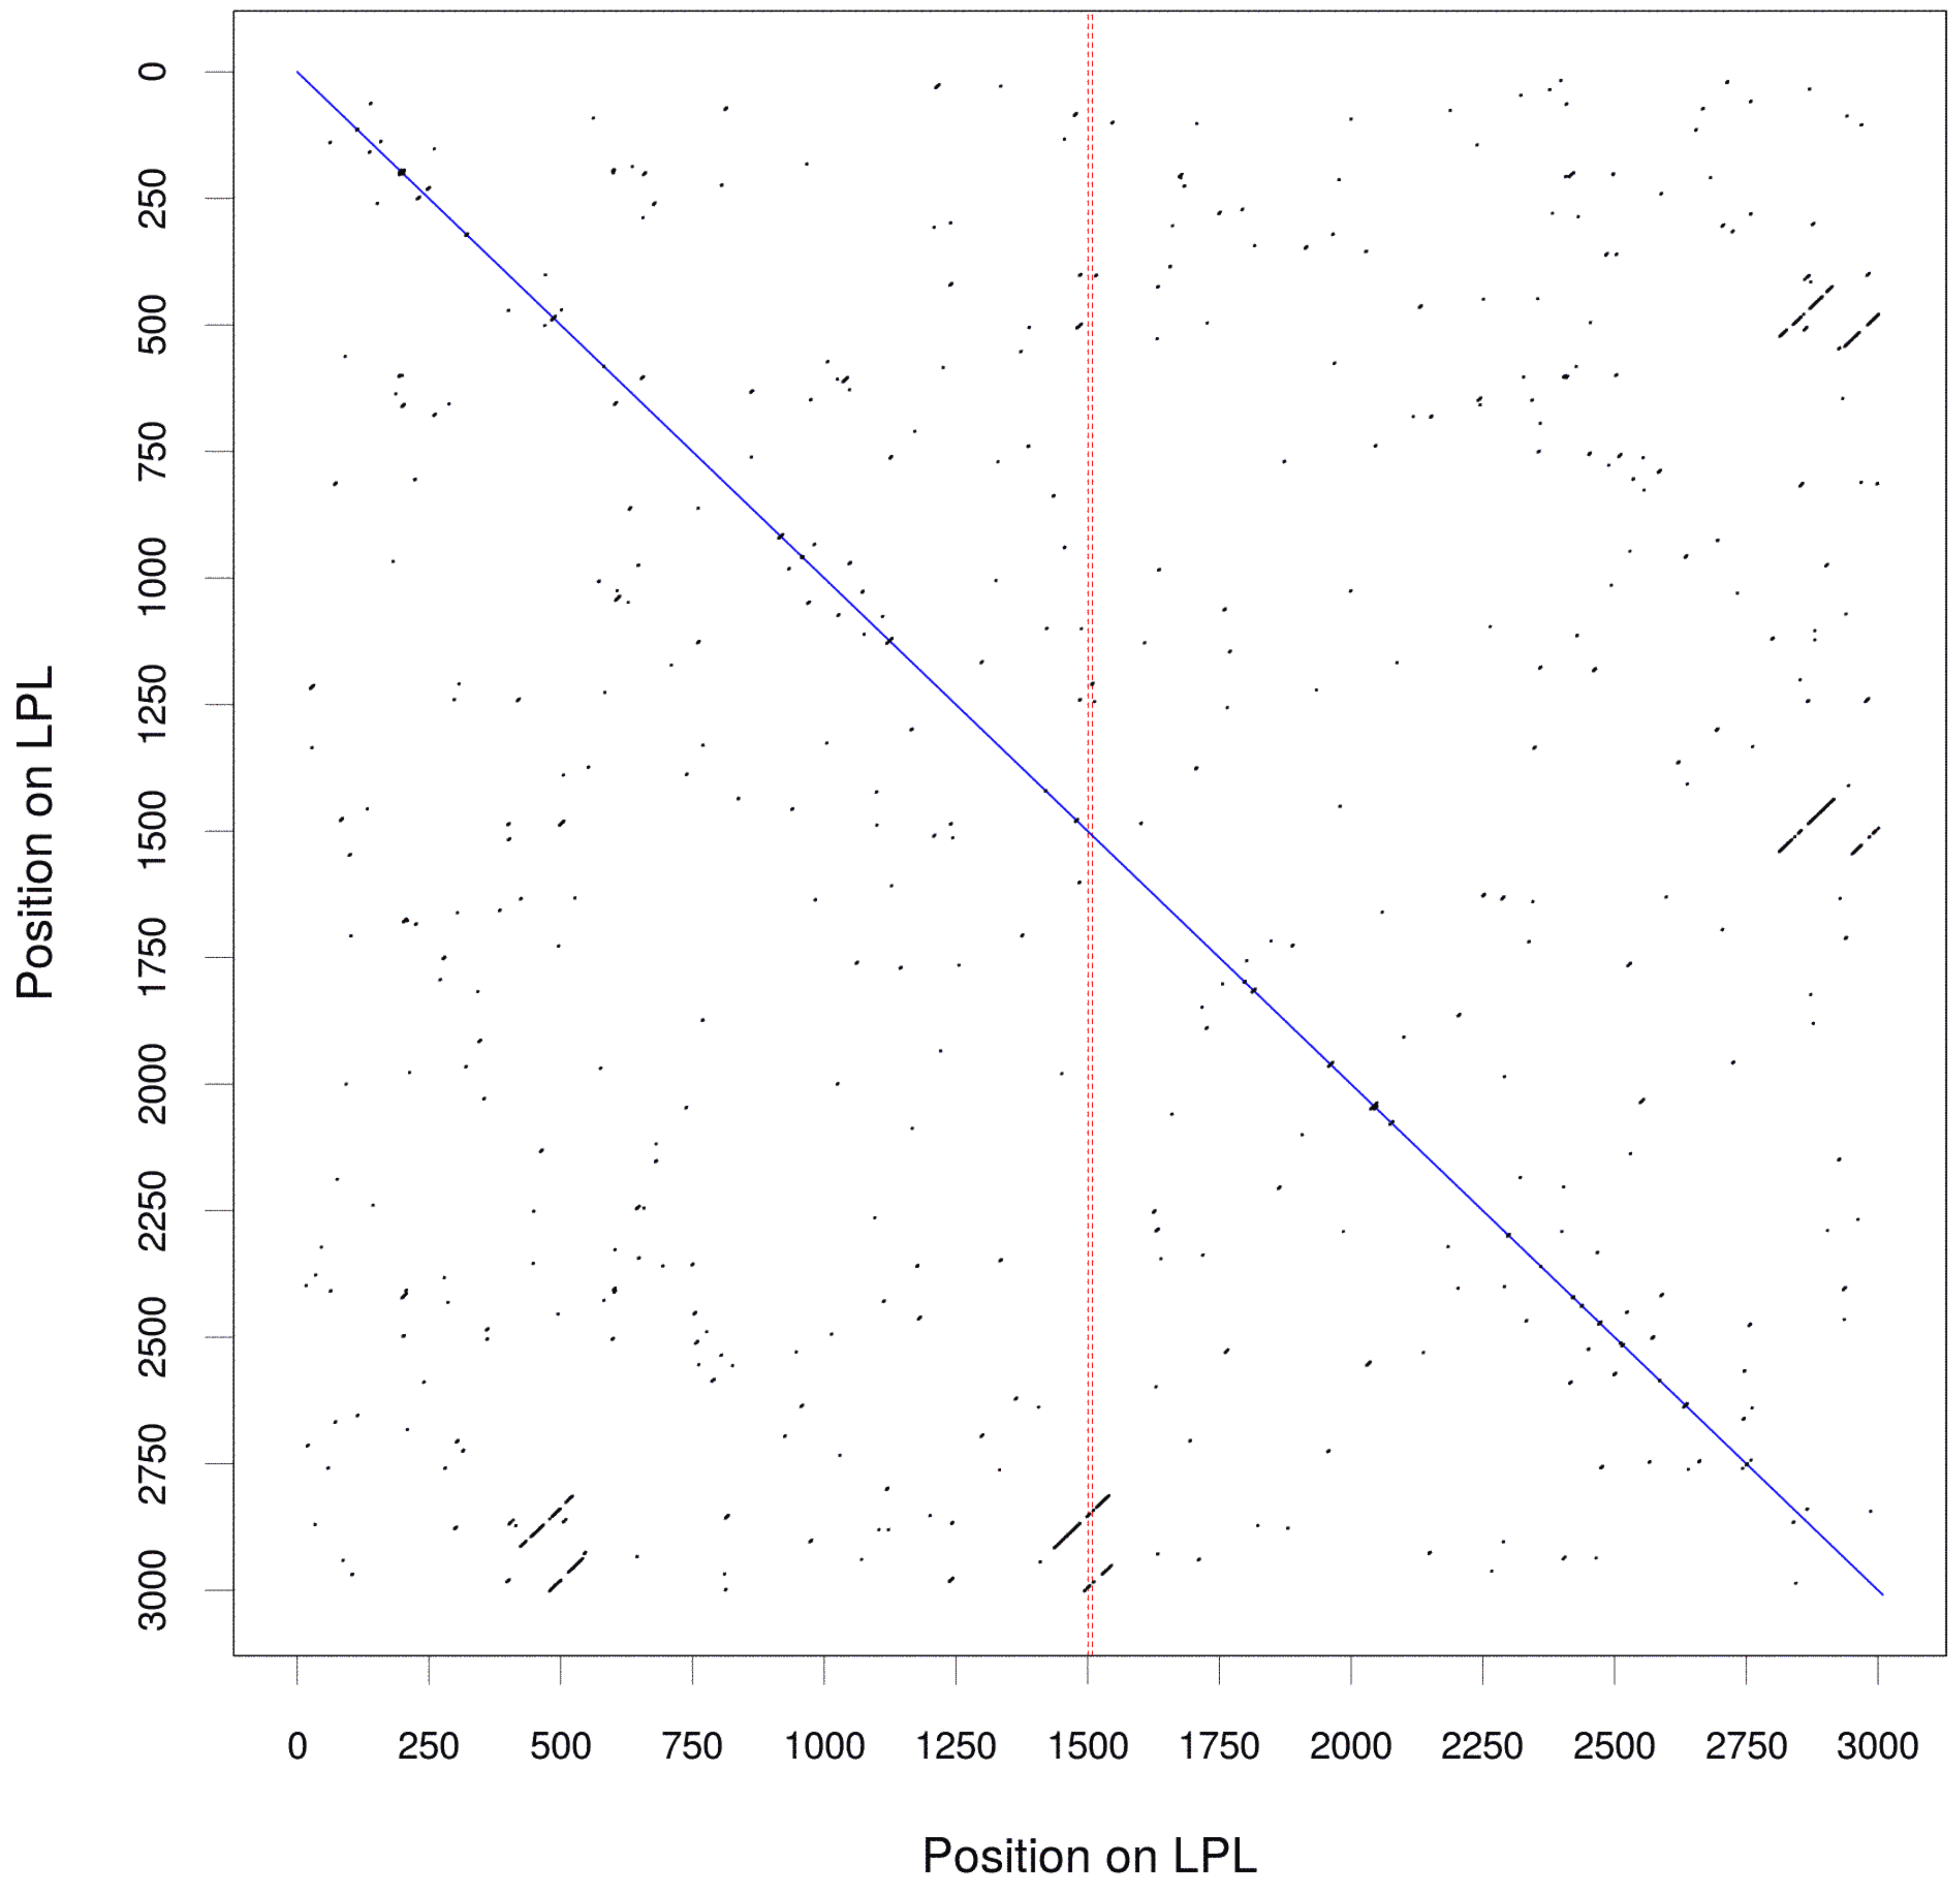

# LPO

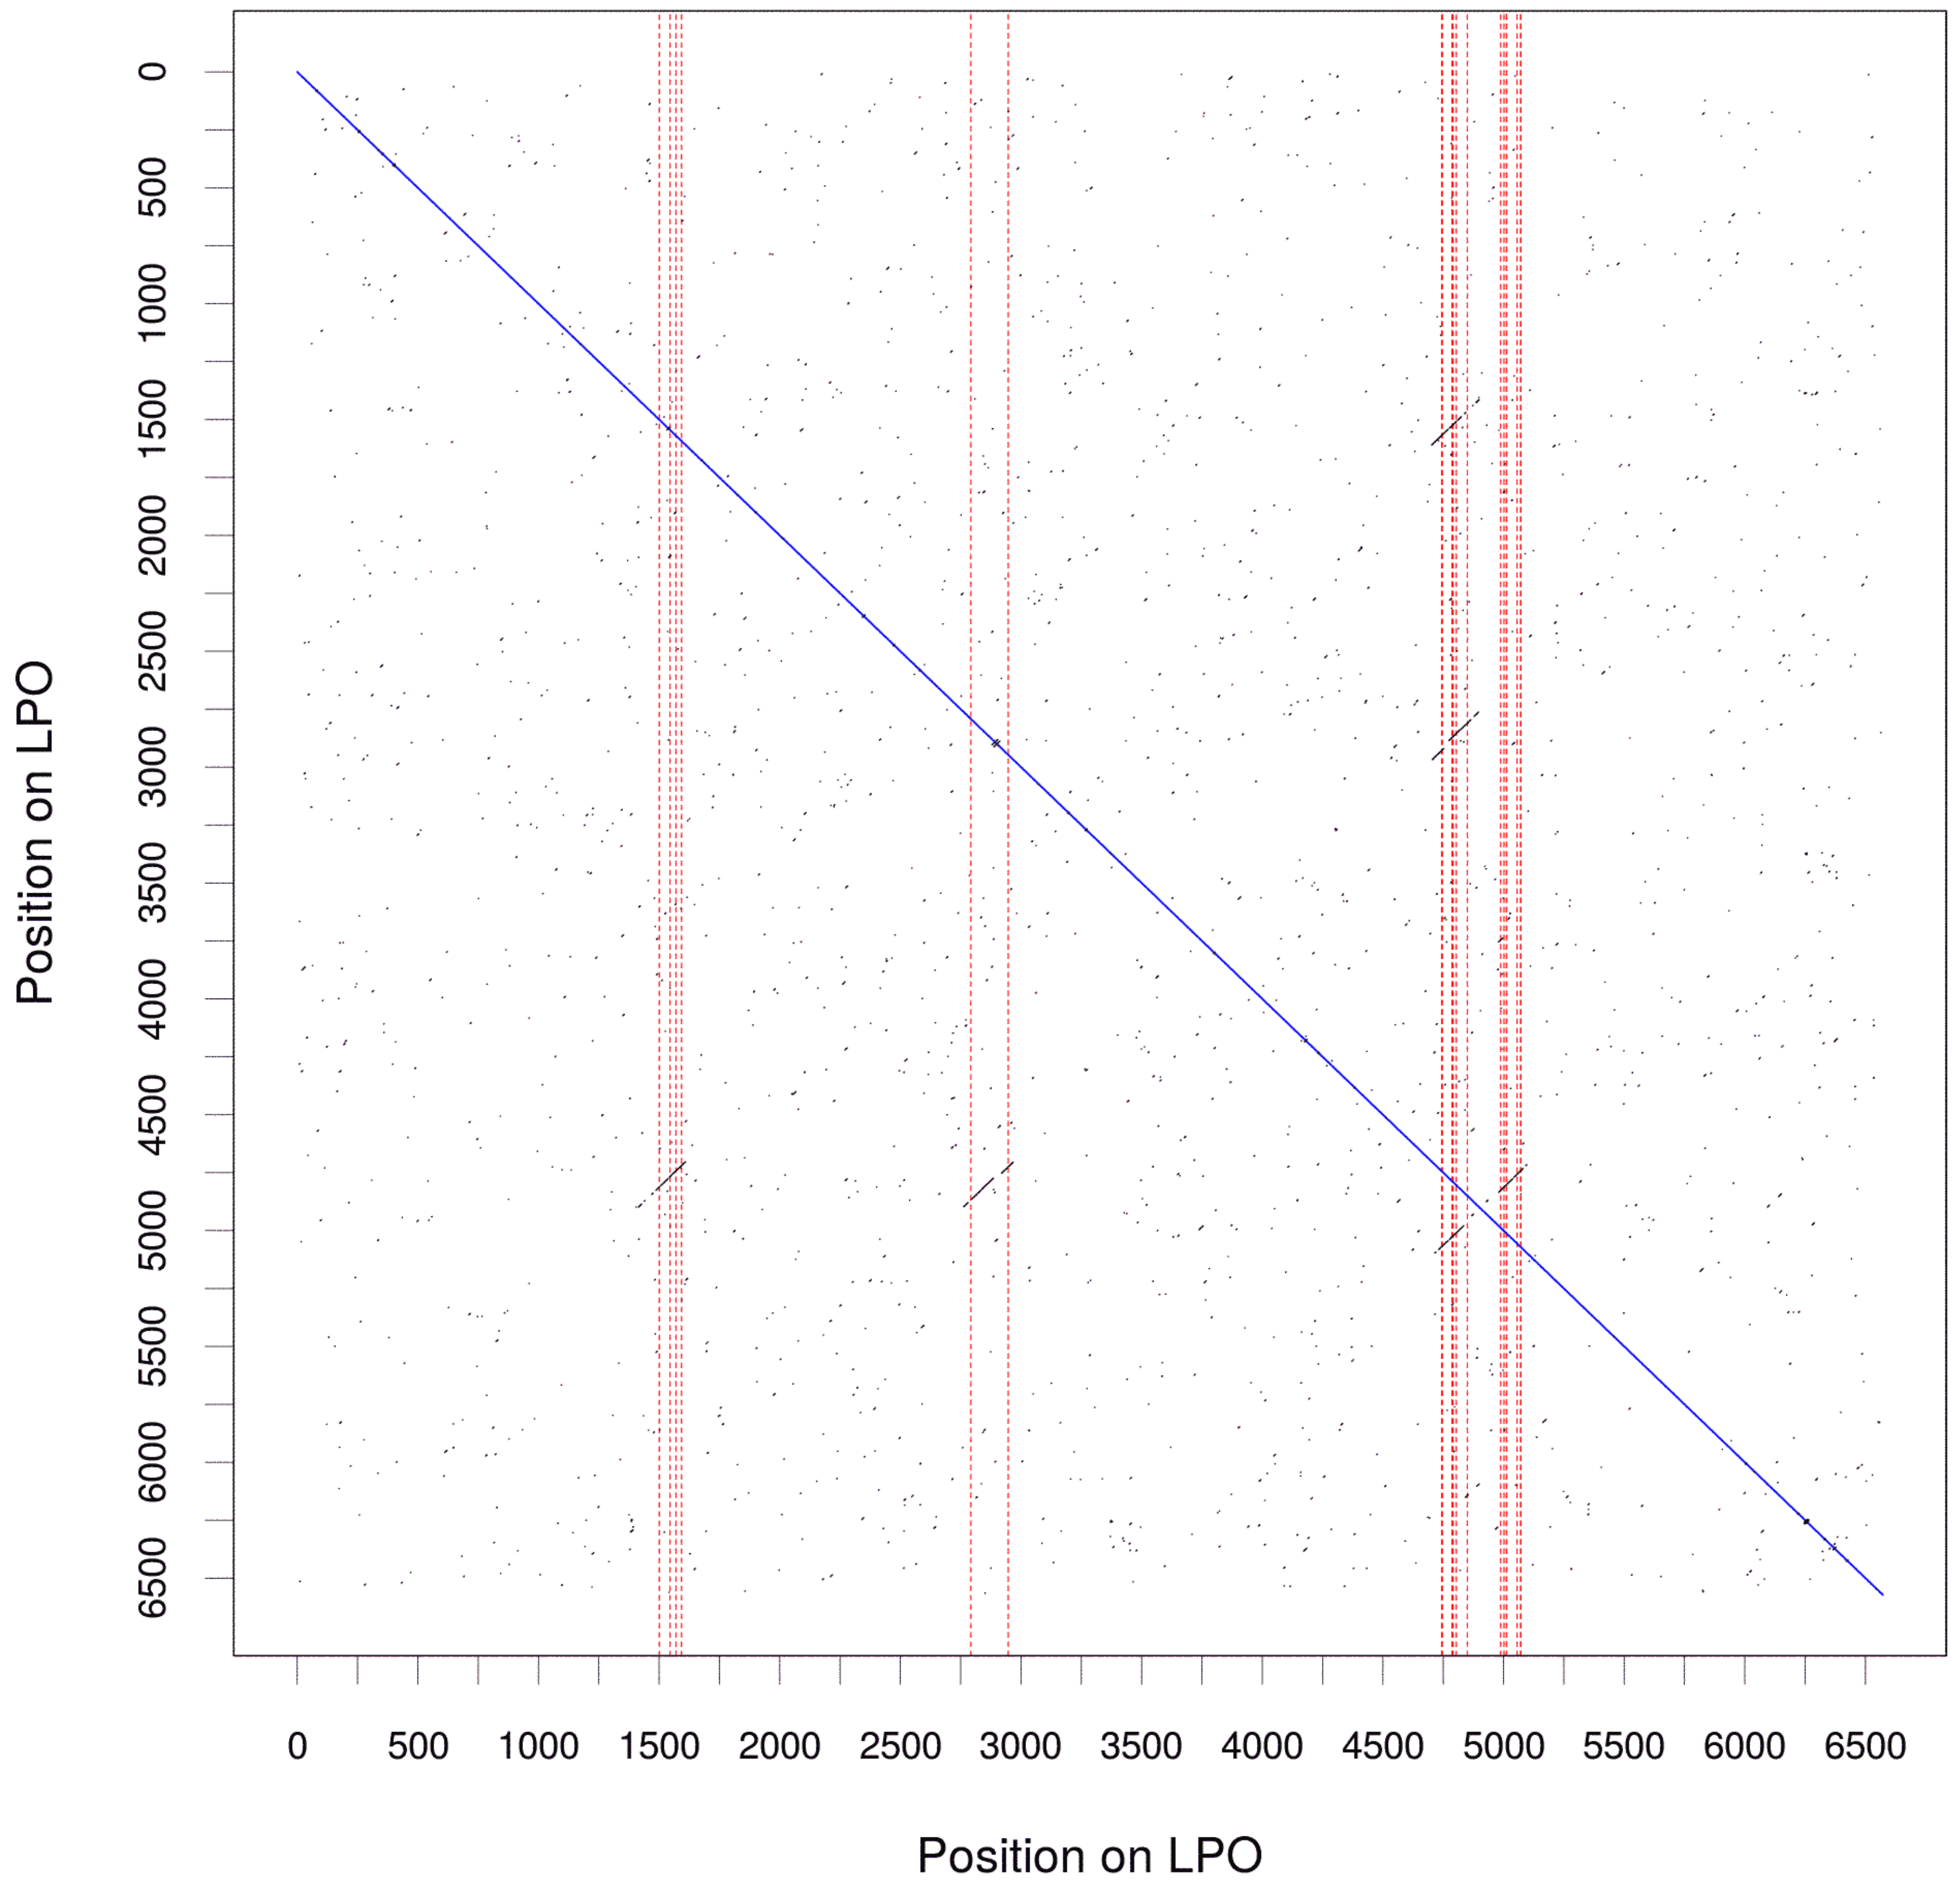

# LRRFIP1

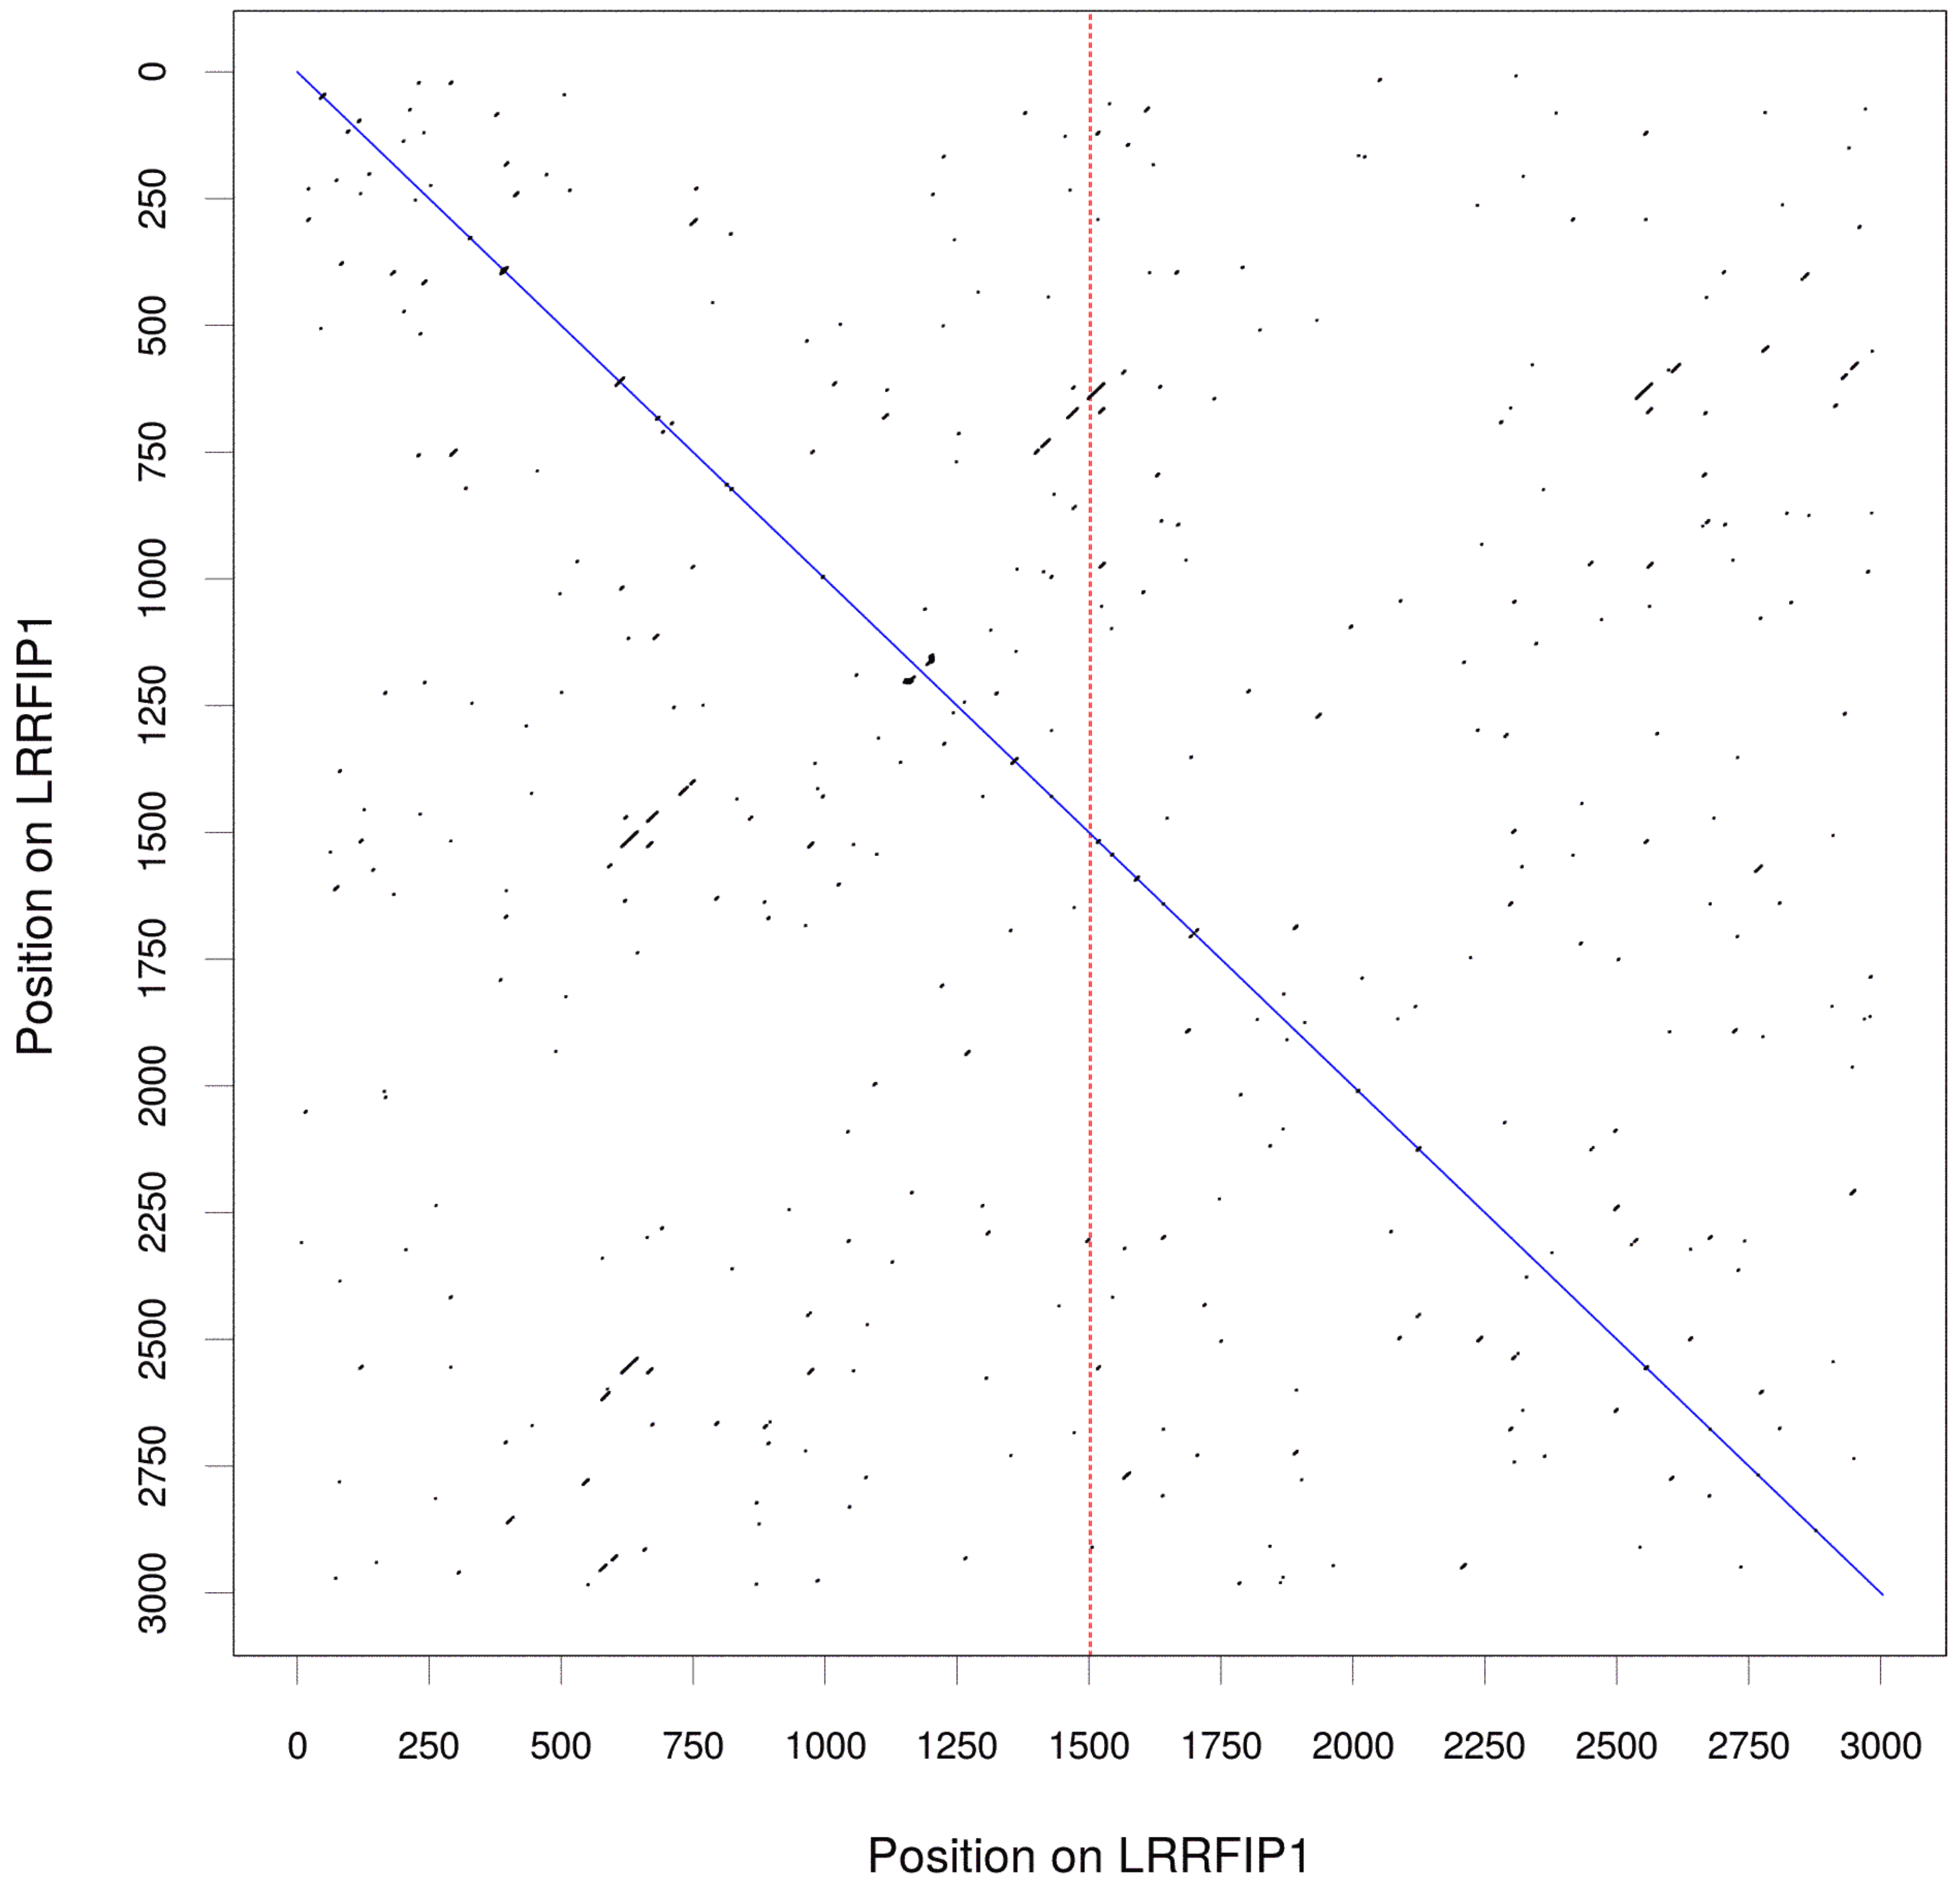

# LSM6

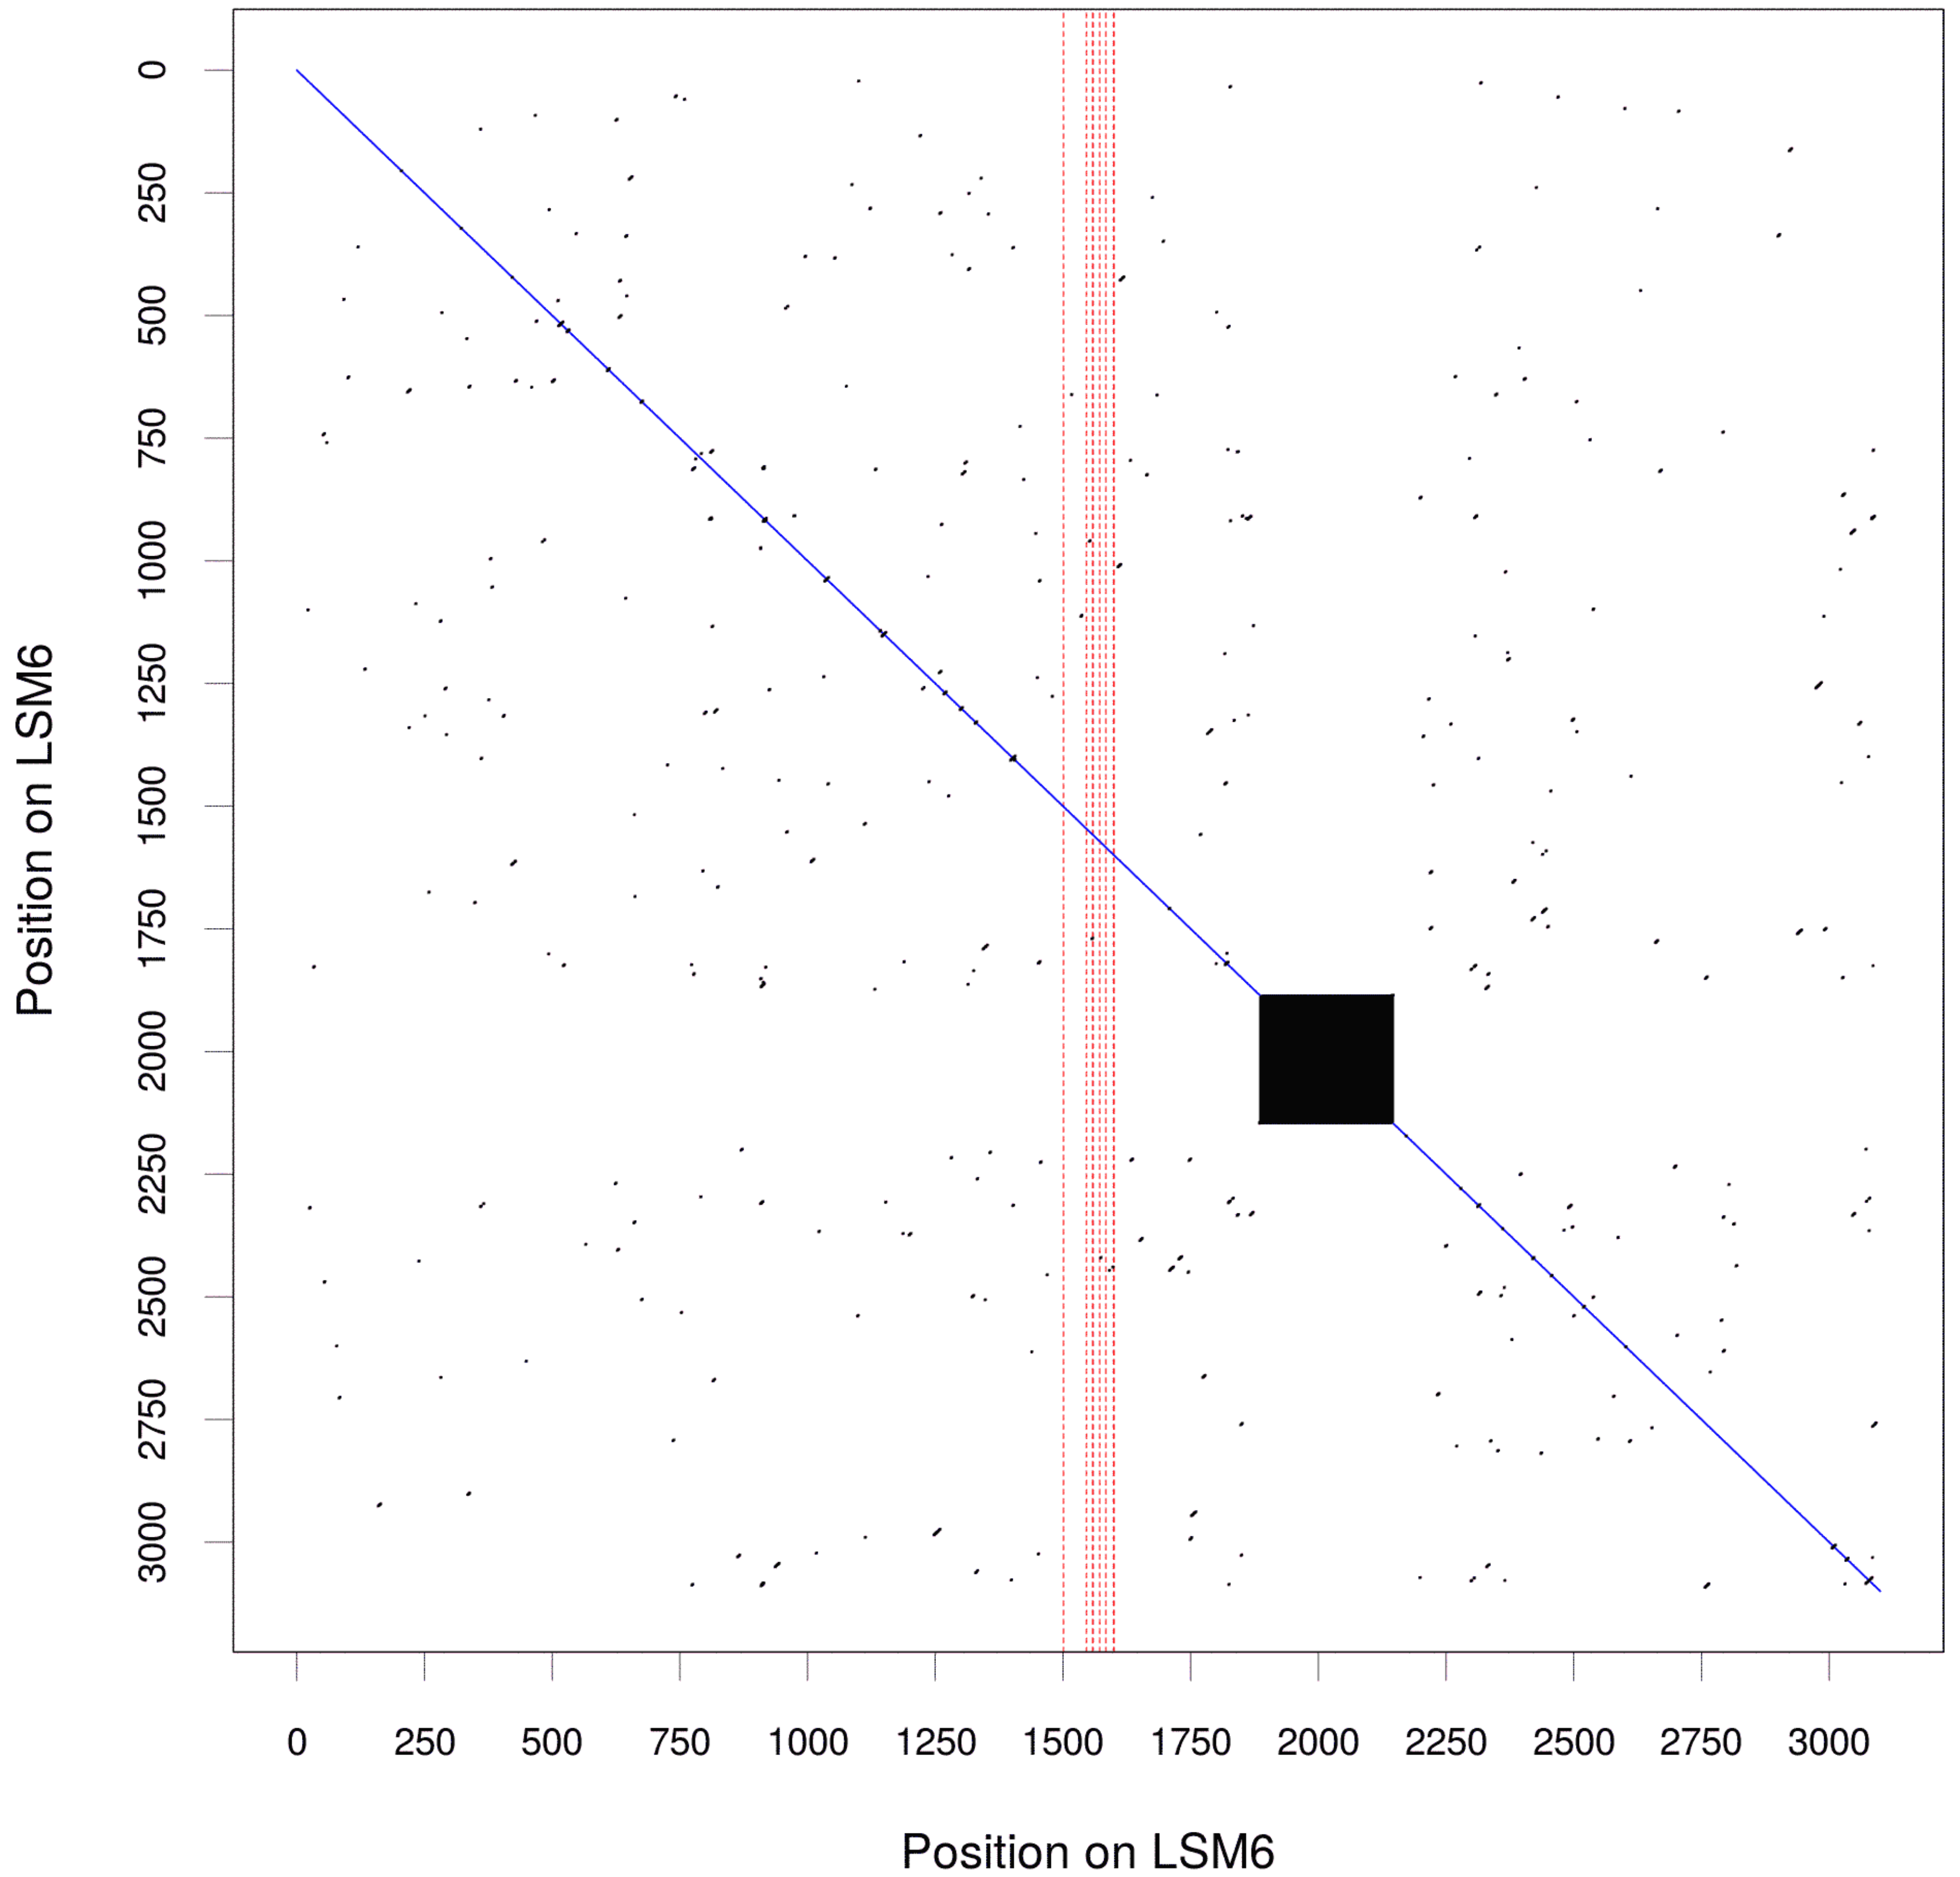

# LTBR

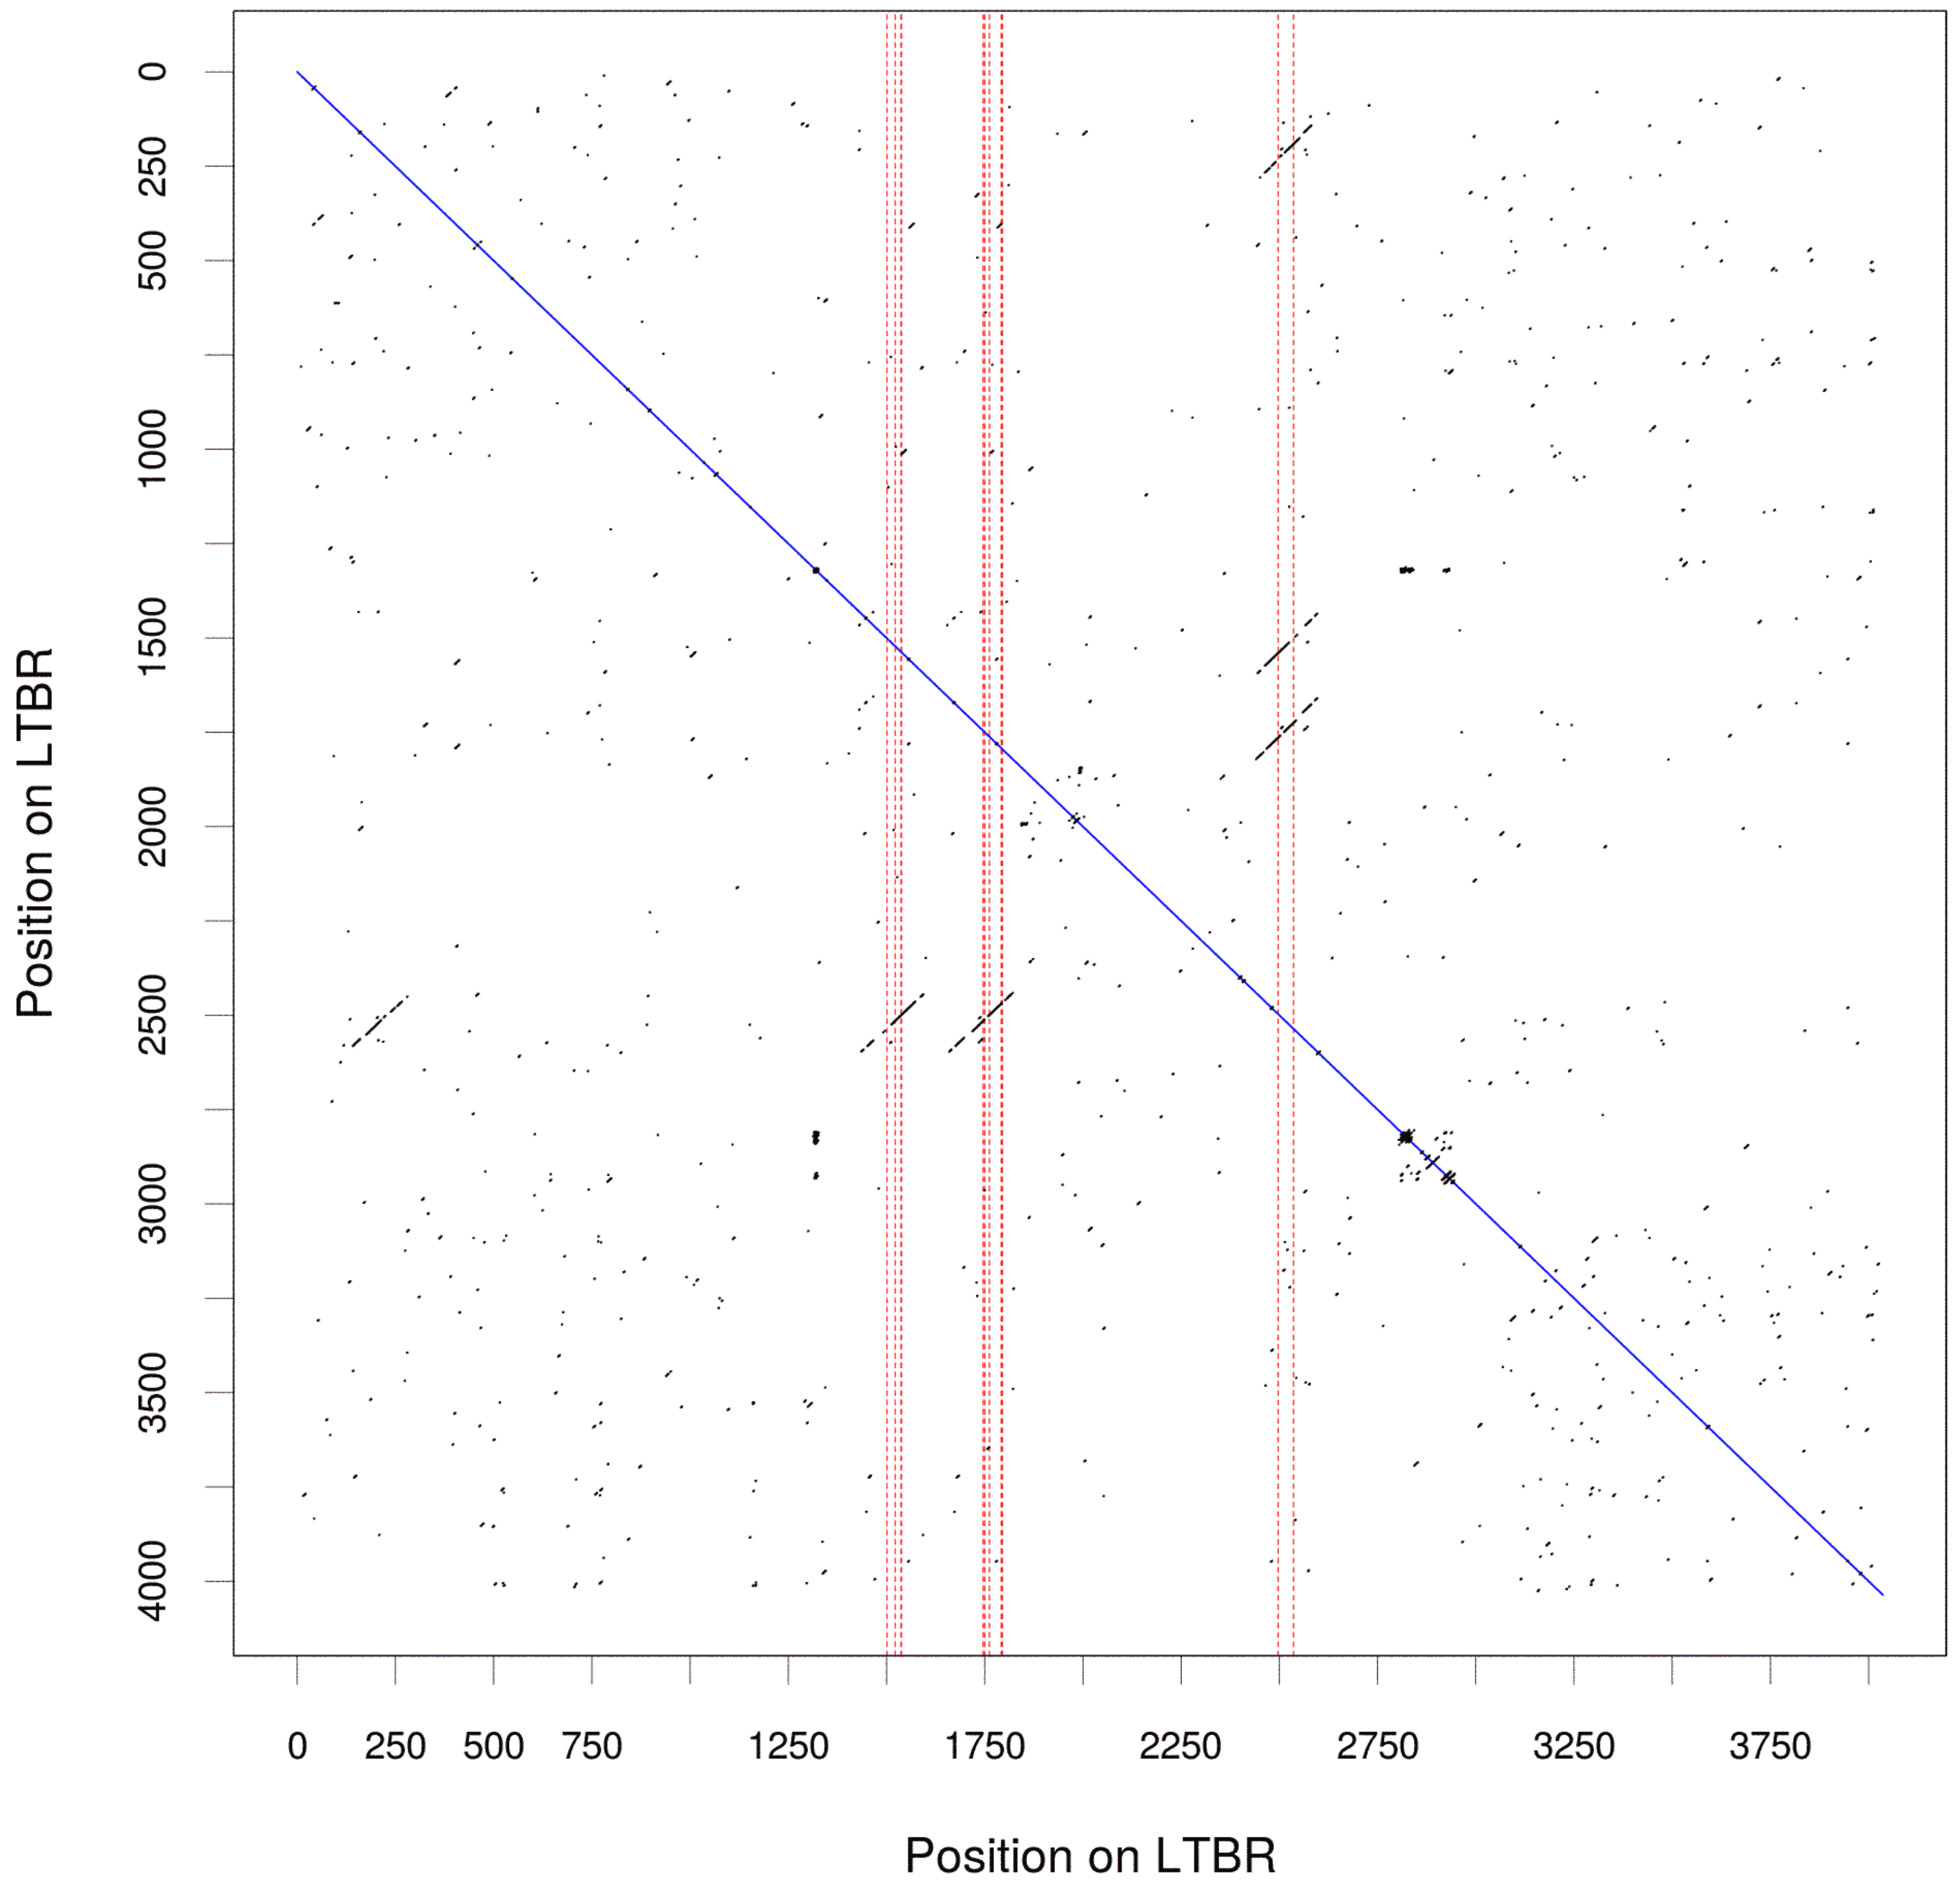



# LTF

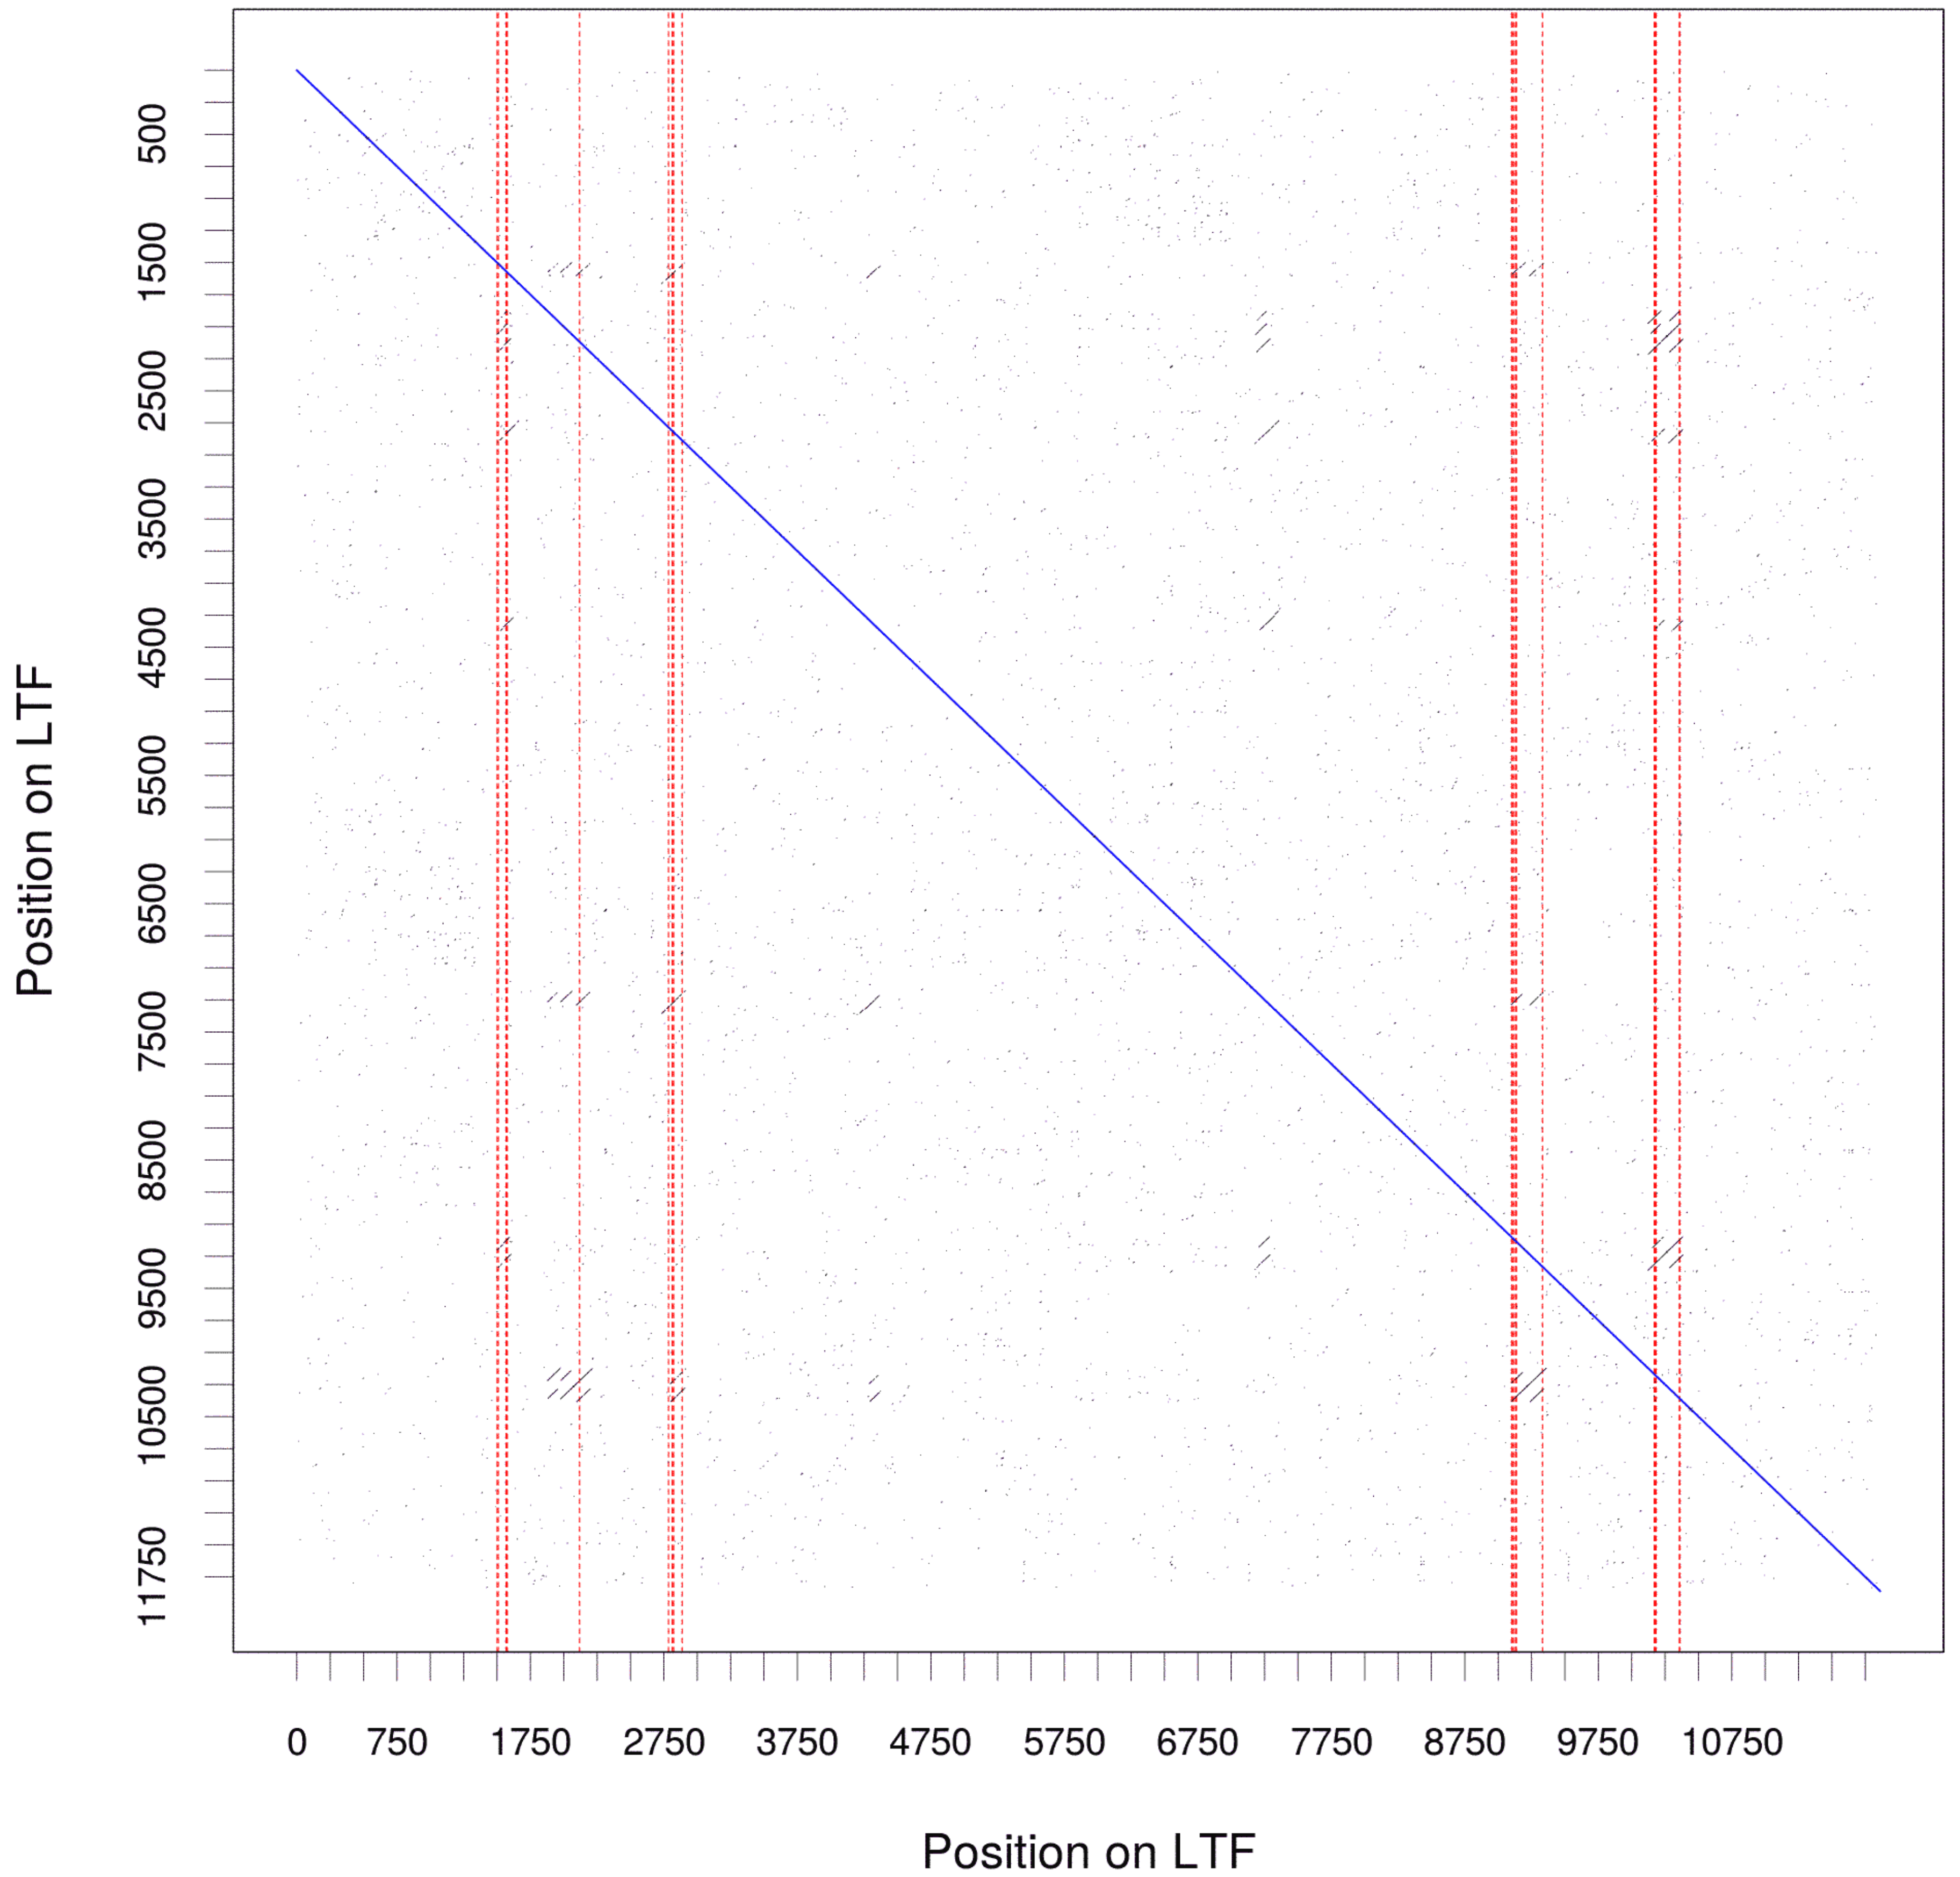

# LUC7L

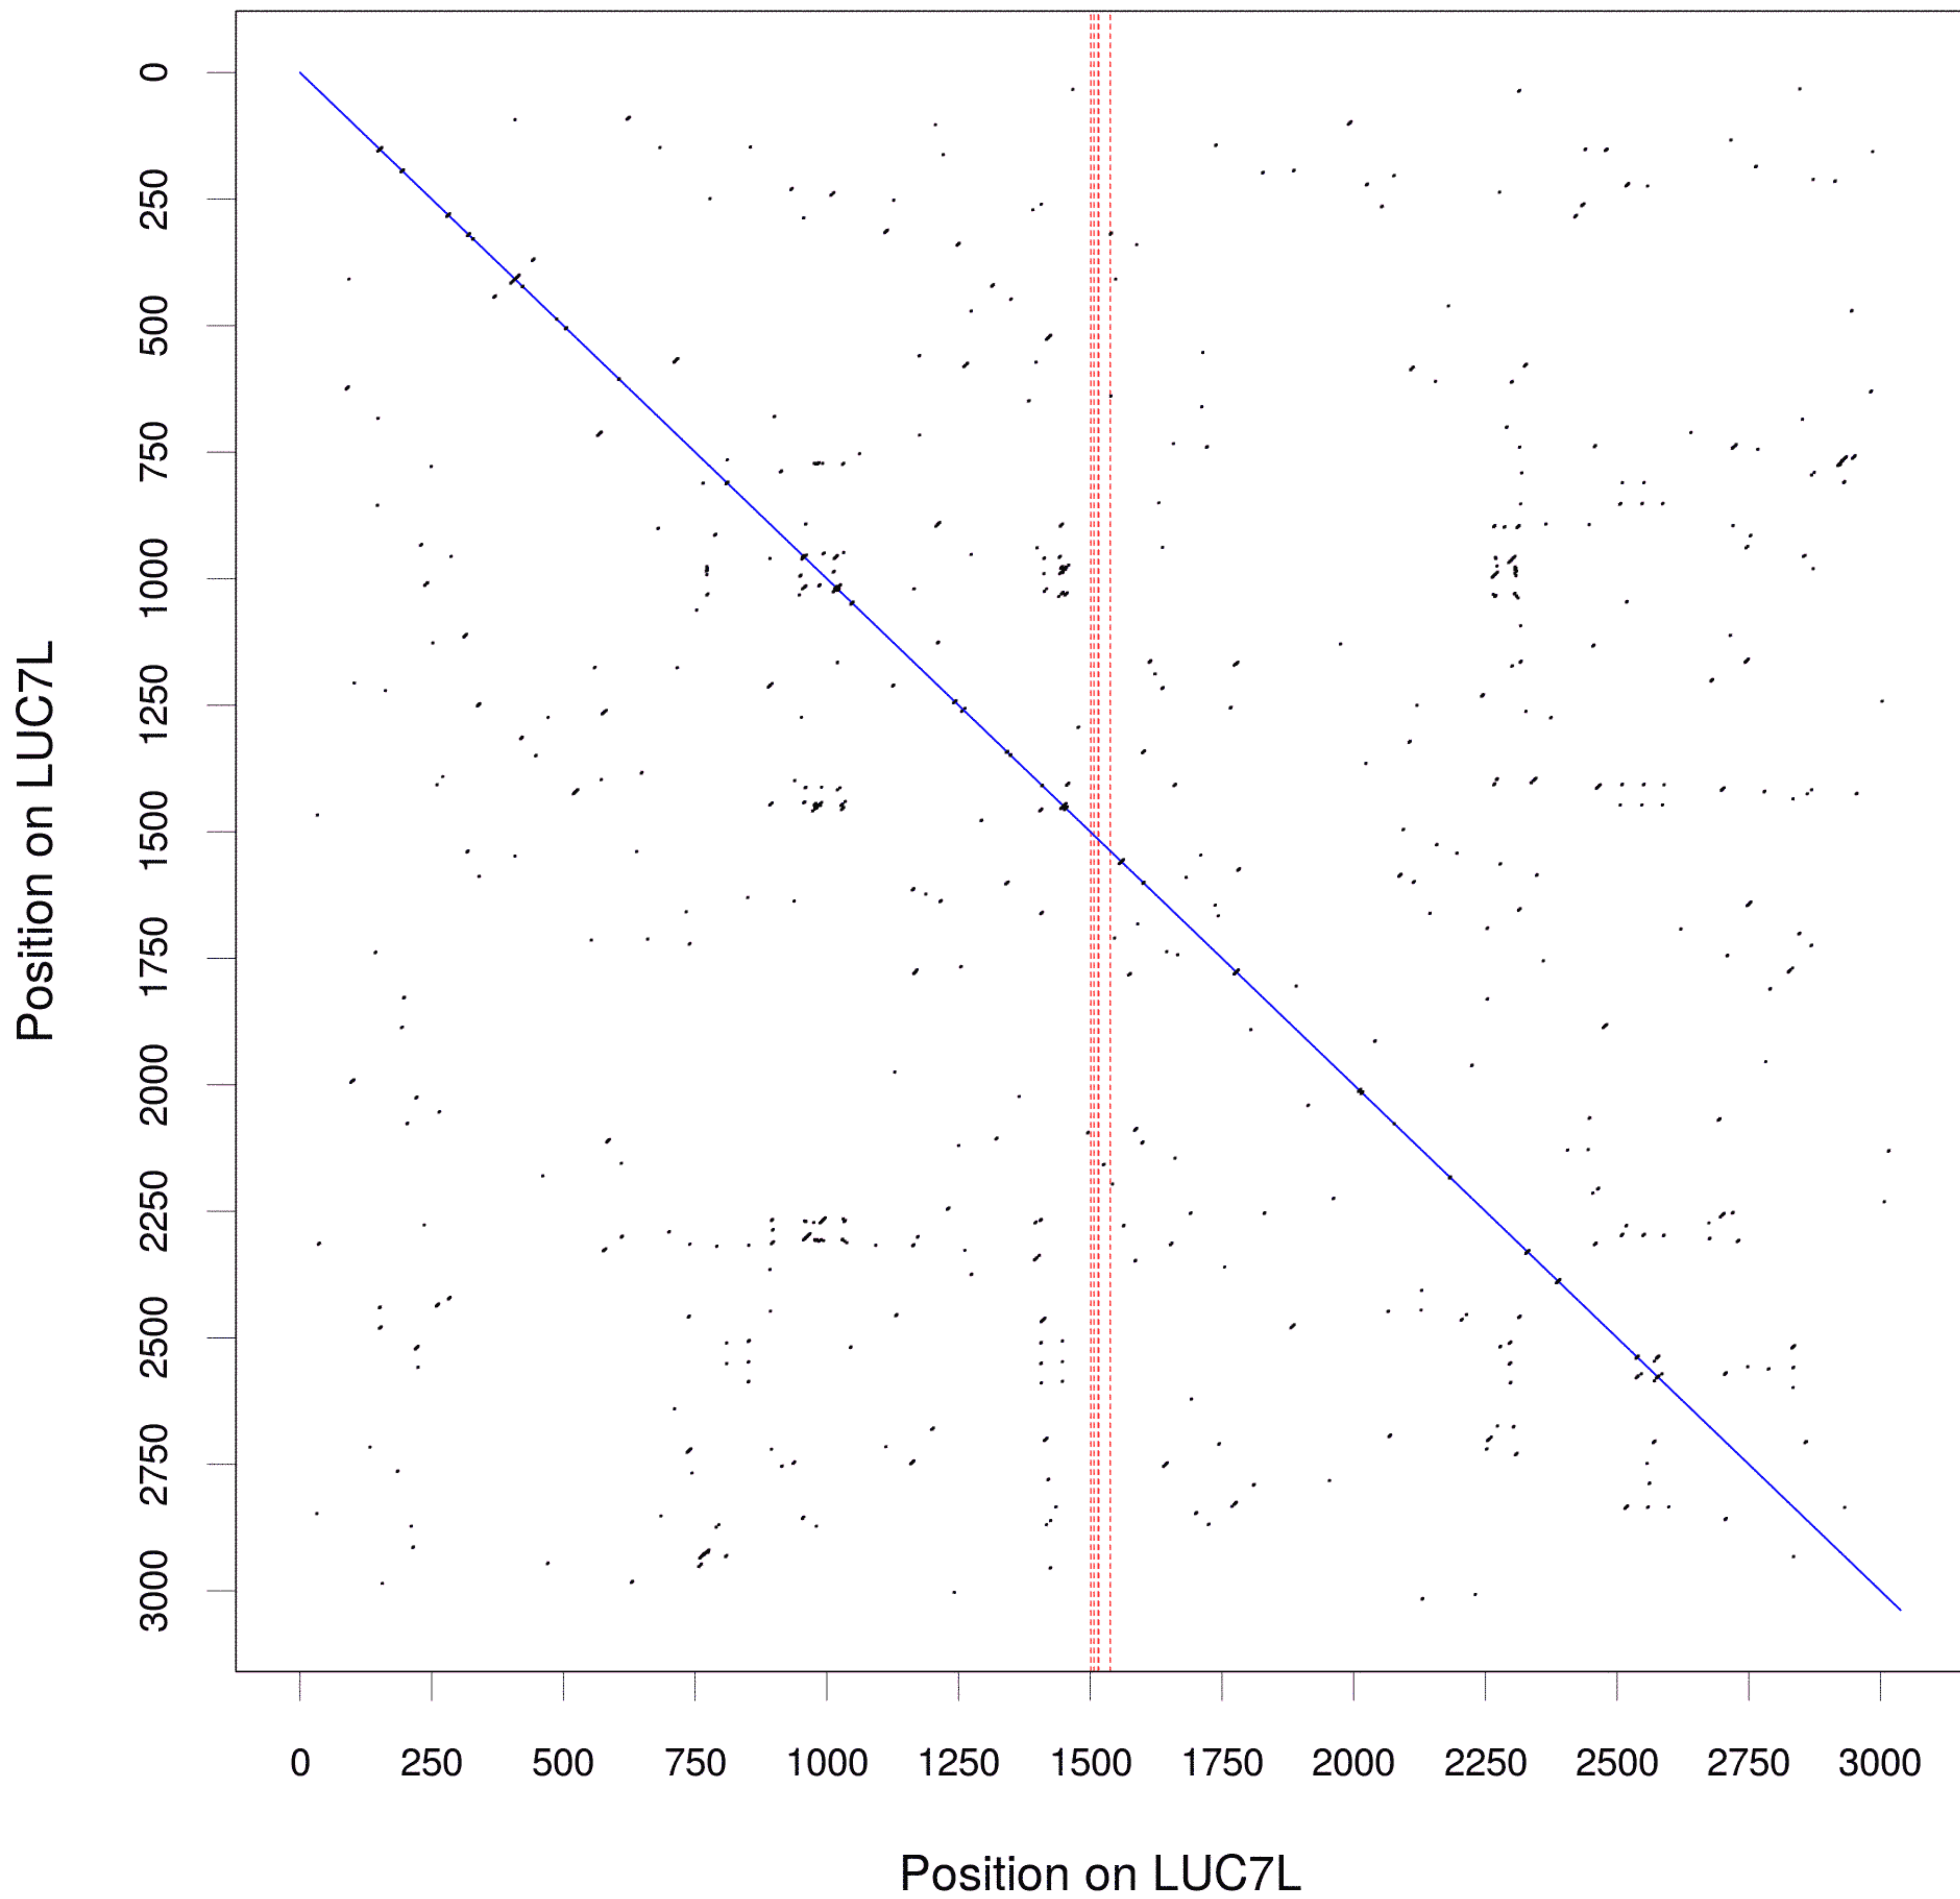

# MACROD1

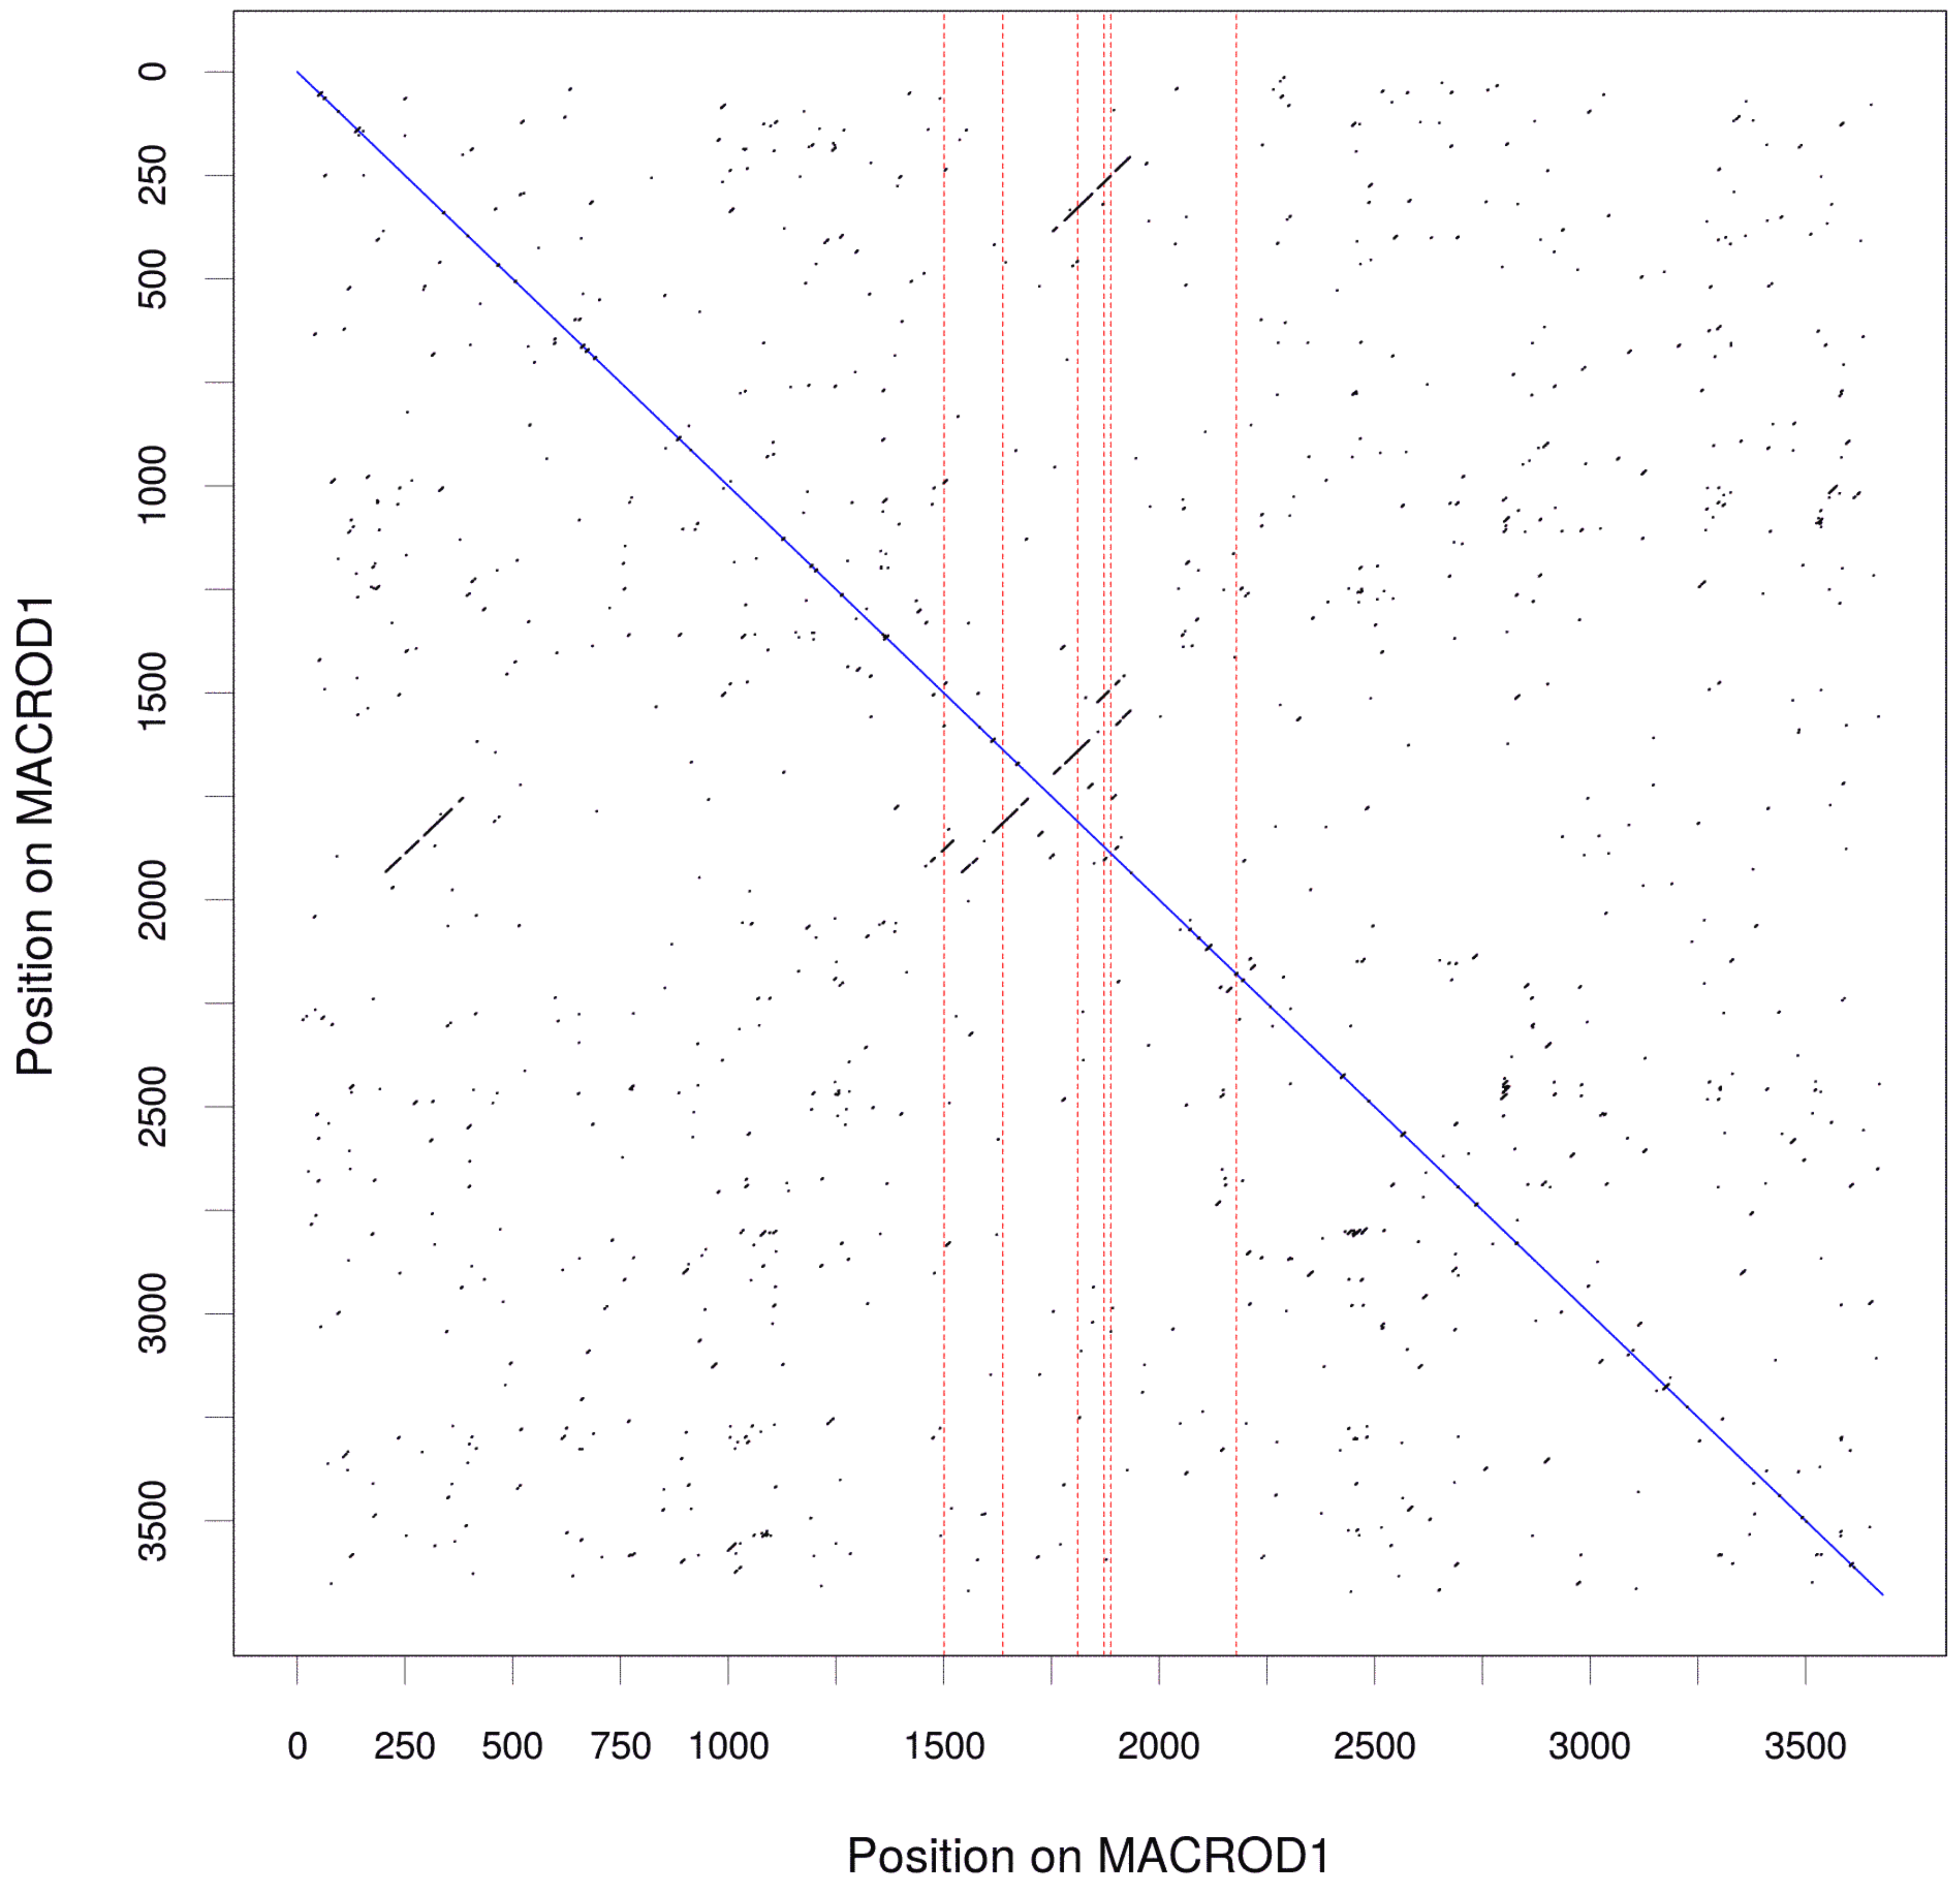

# MAD1L1

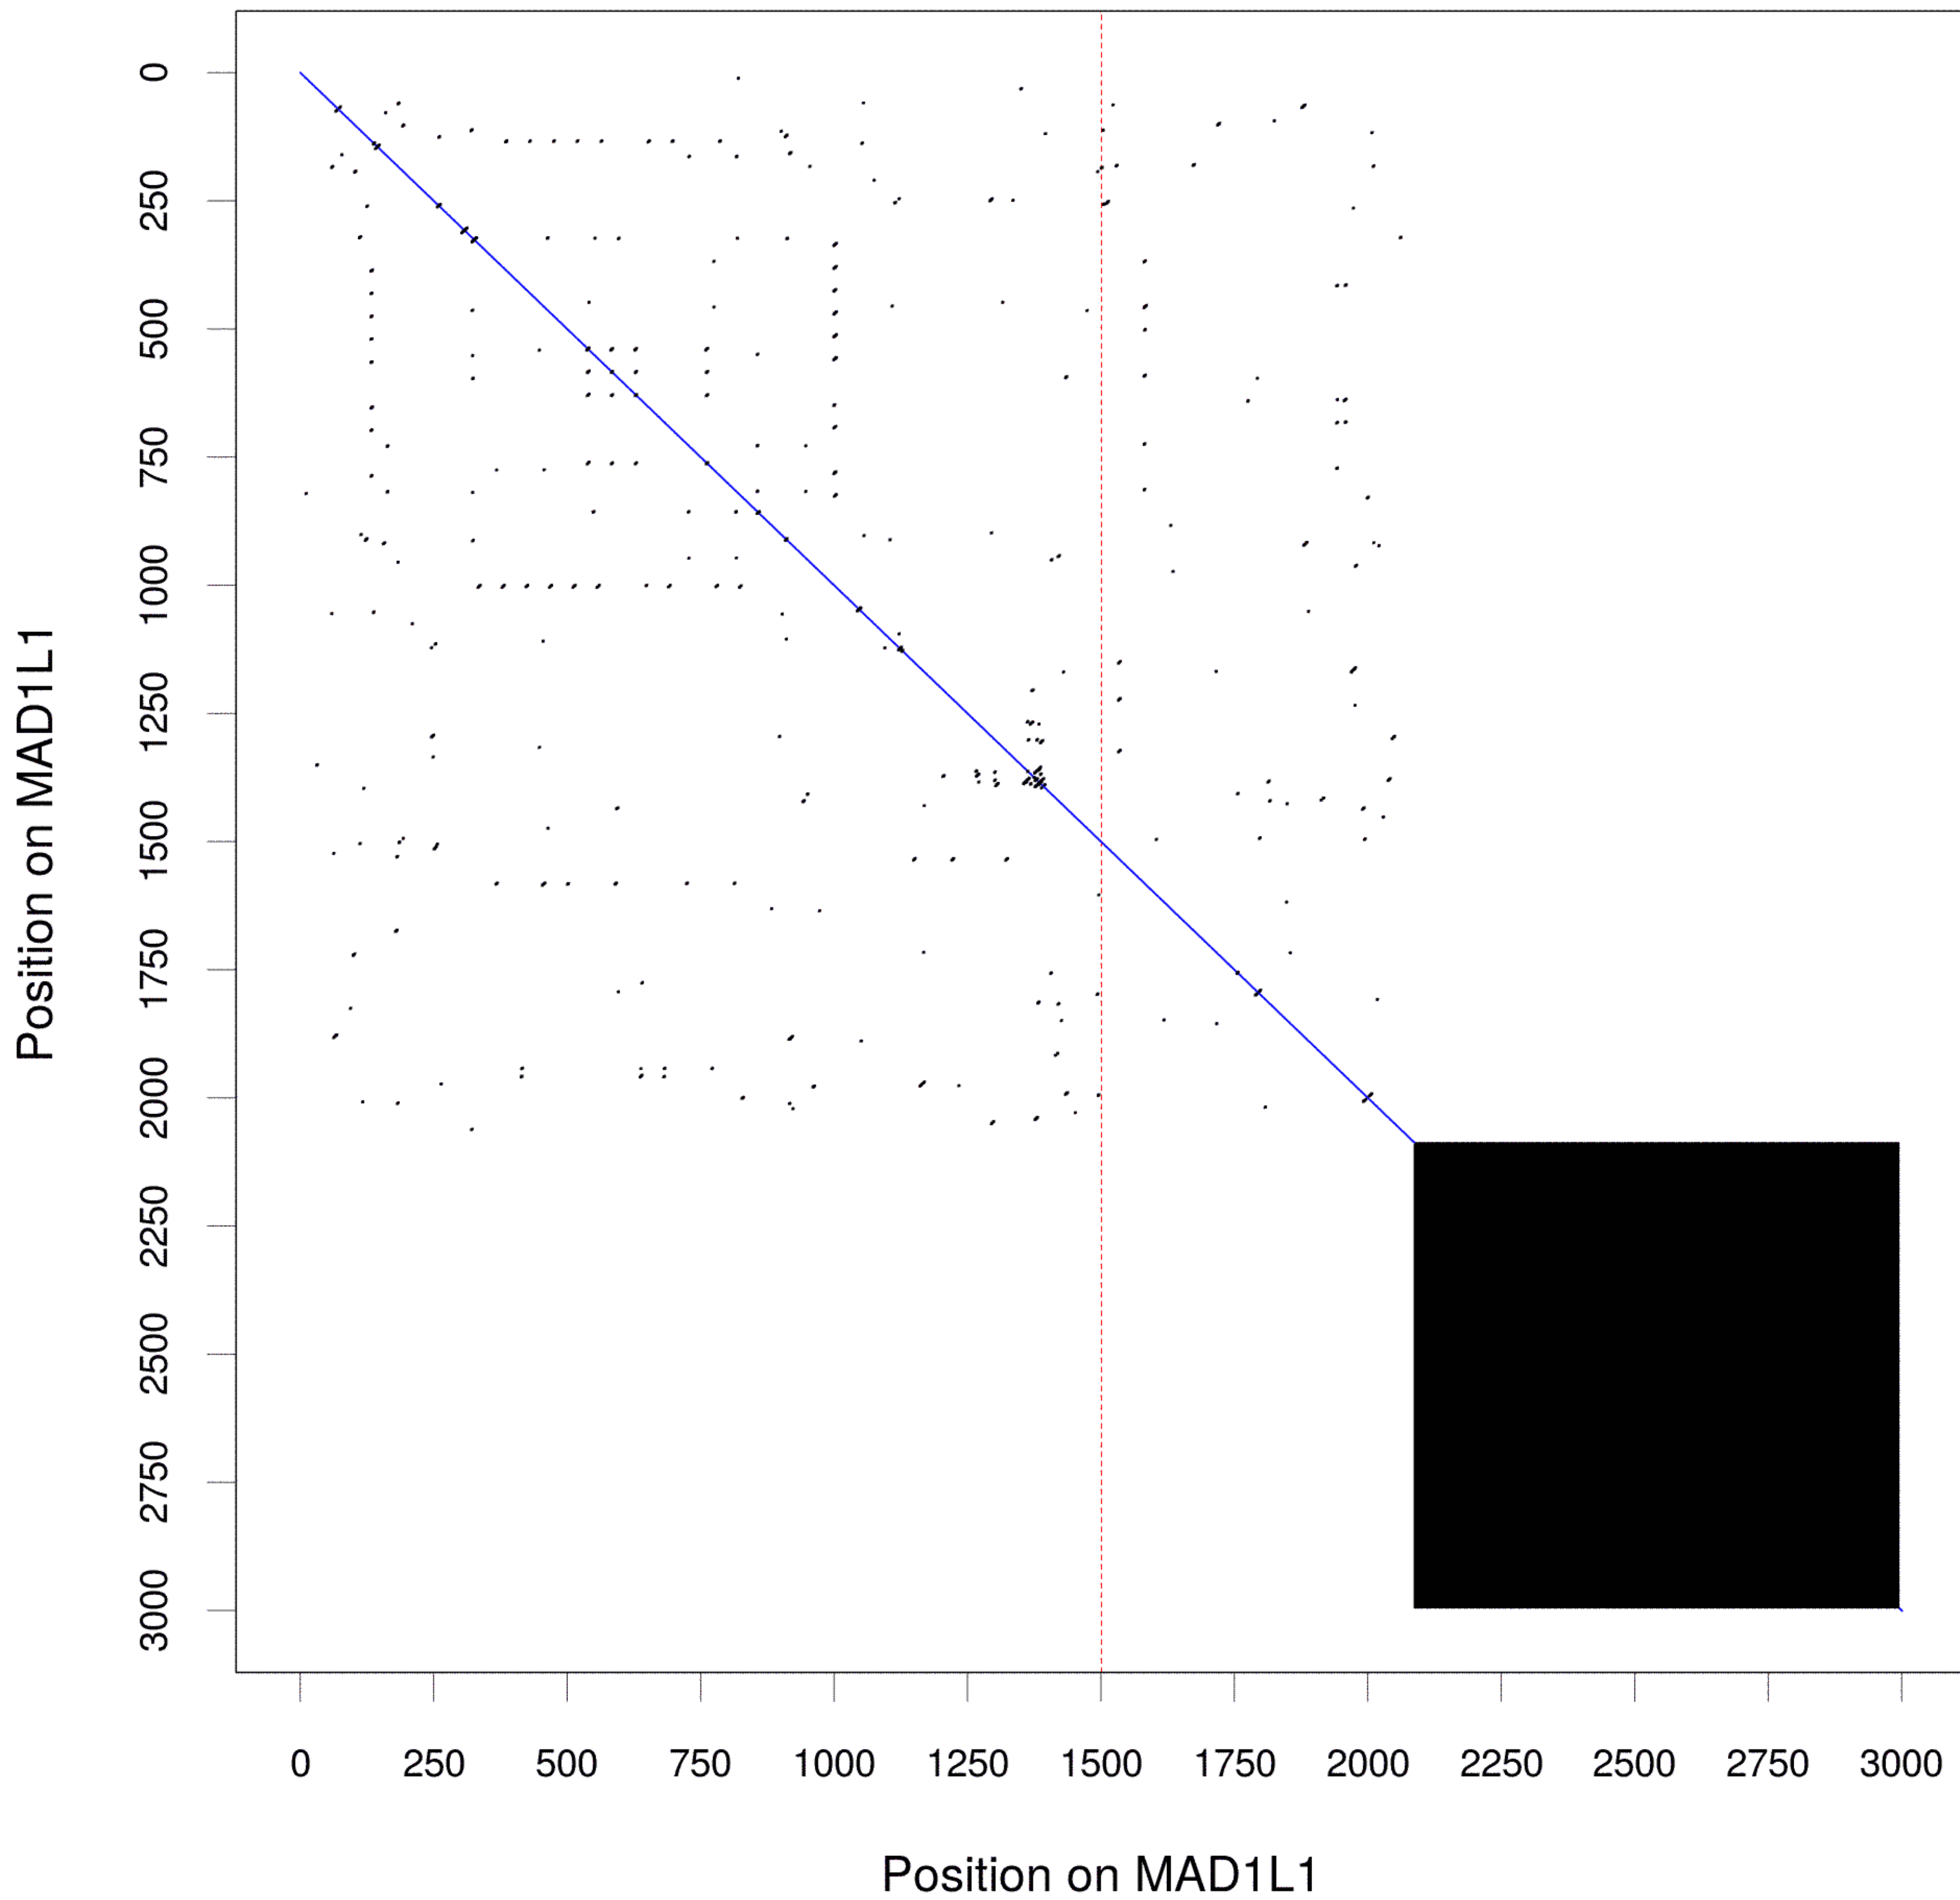

# MAP2K2

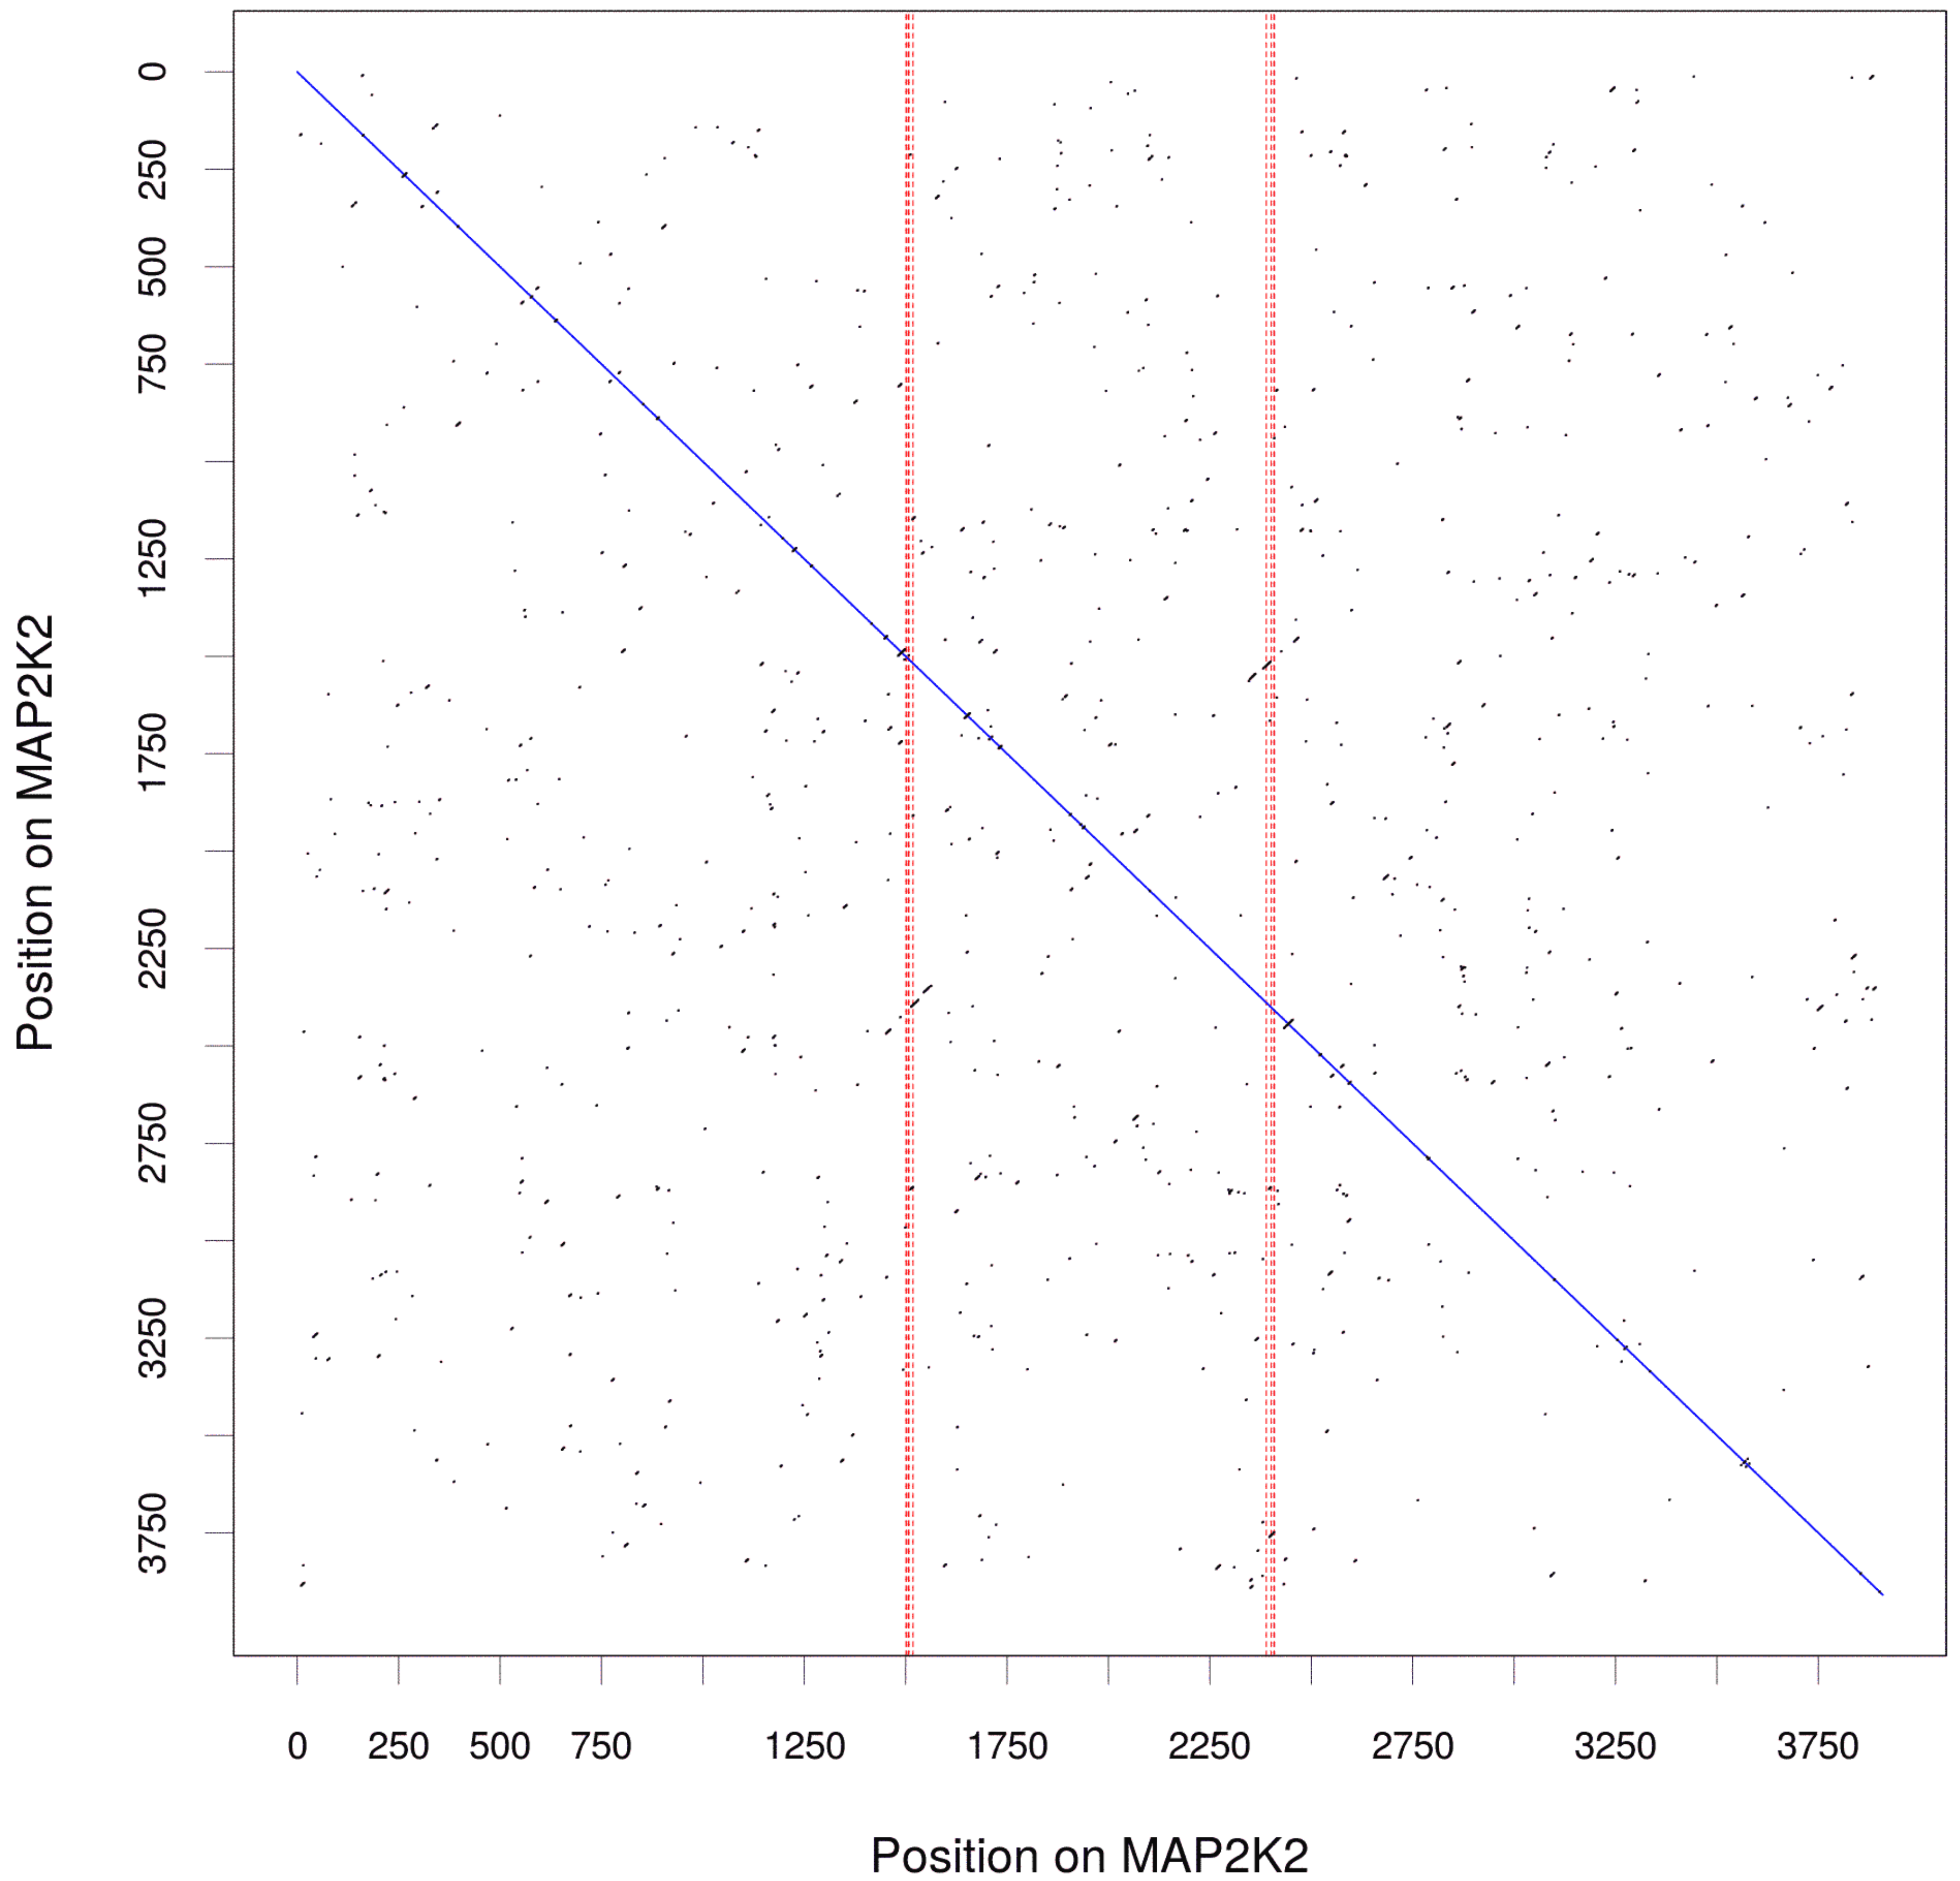

# MARC1

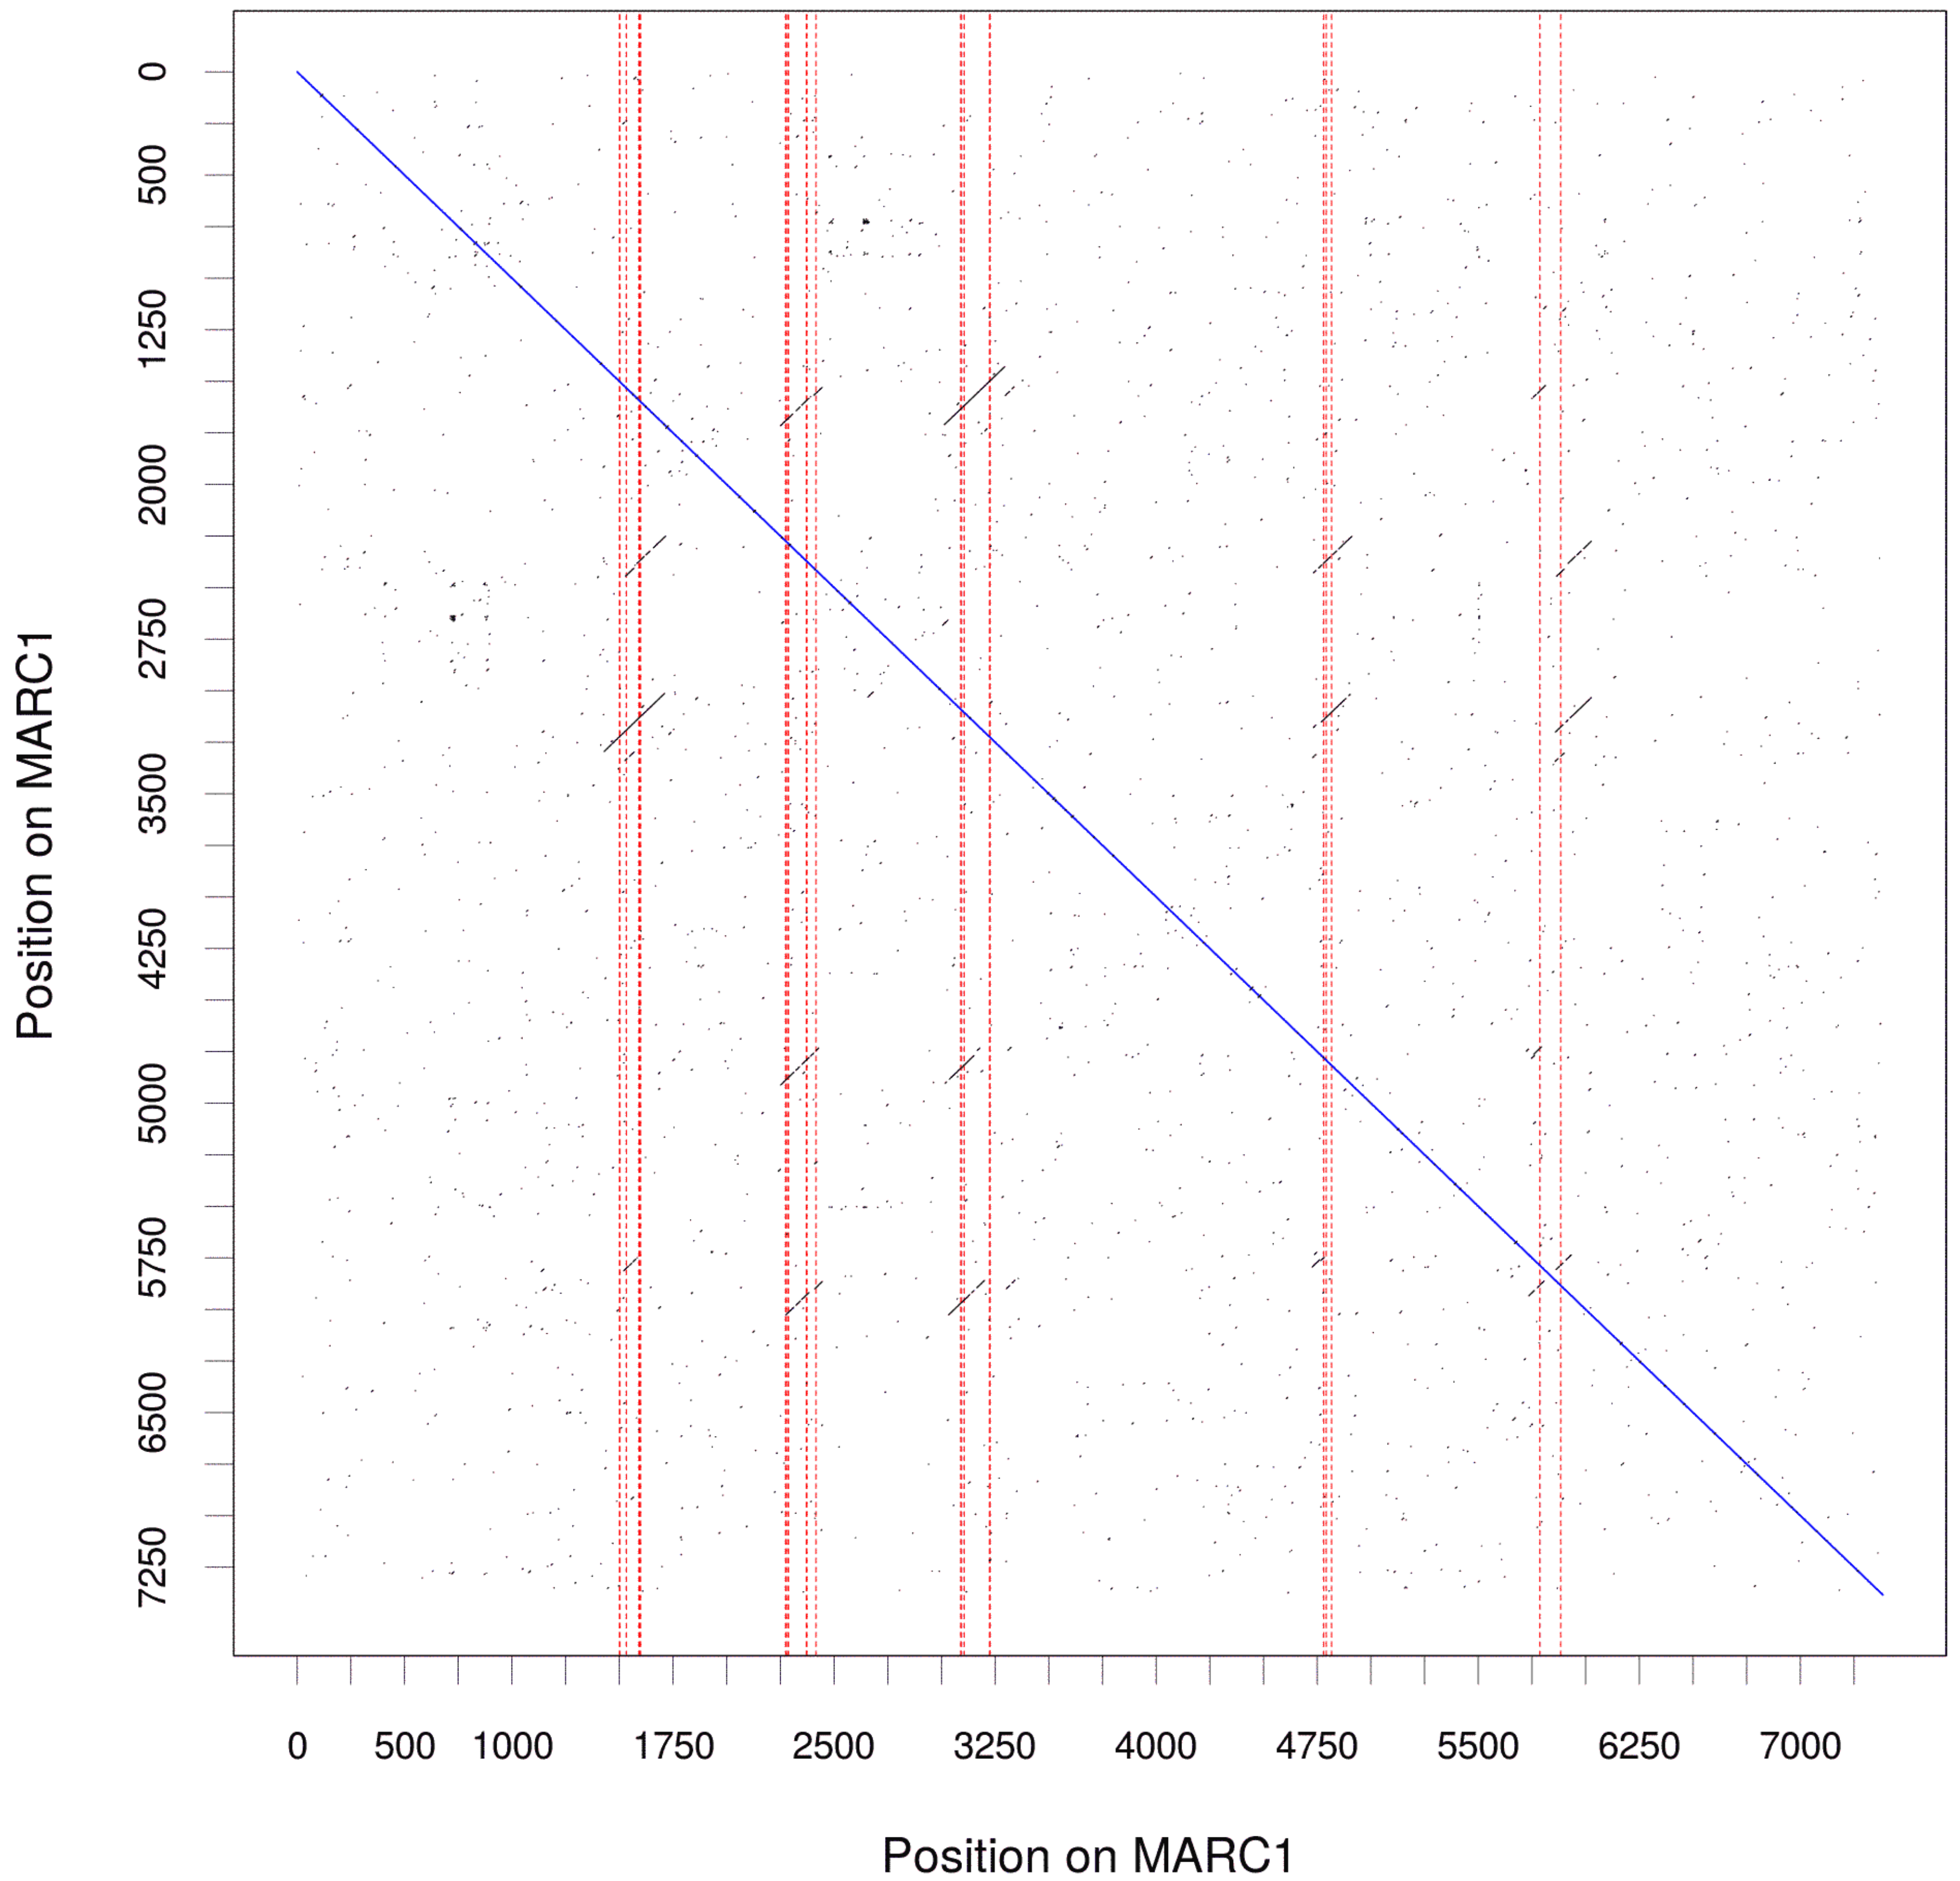

# MARCH2

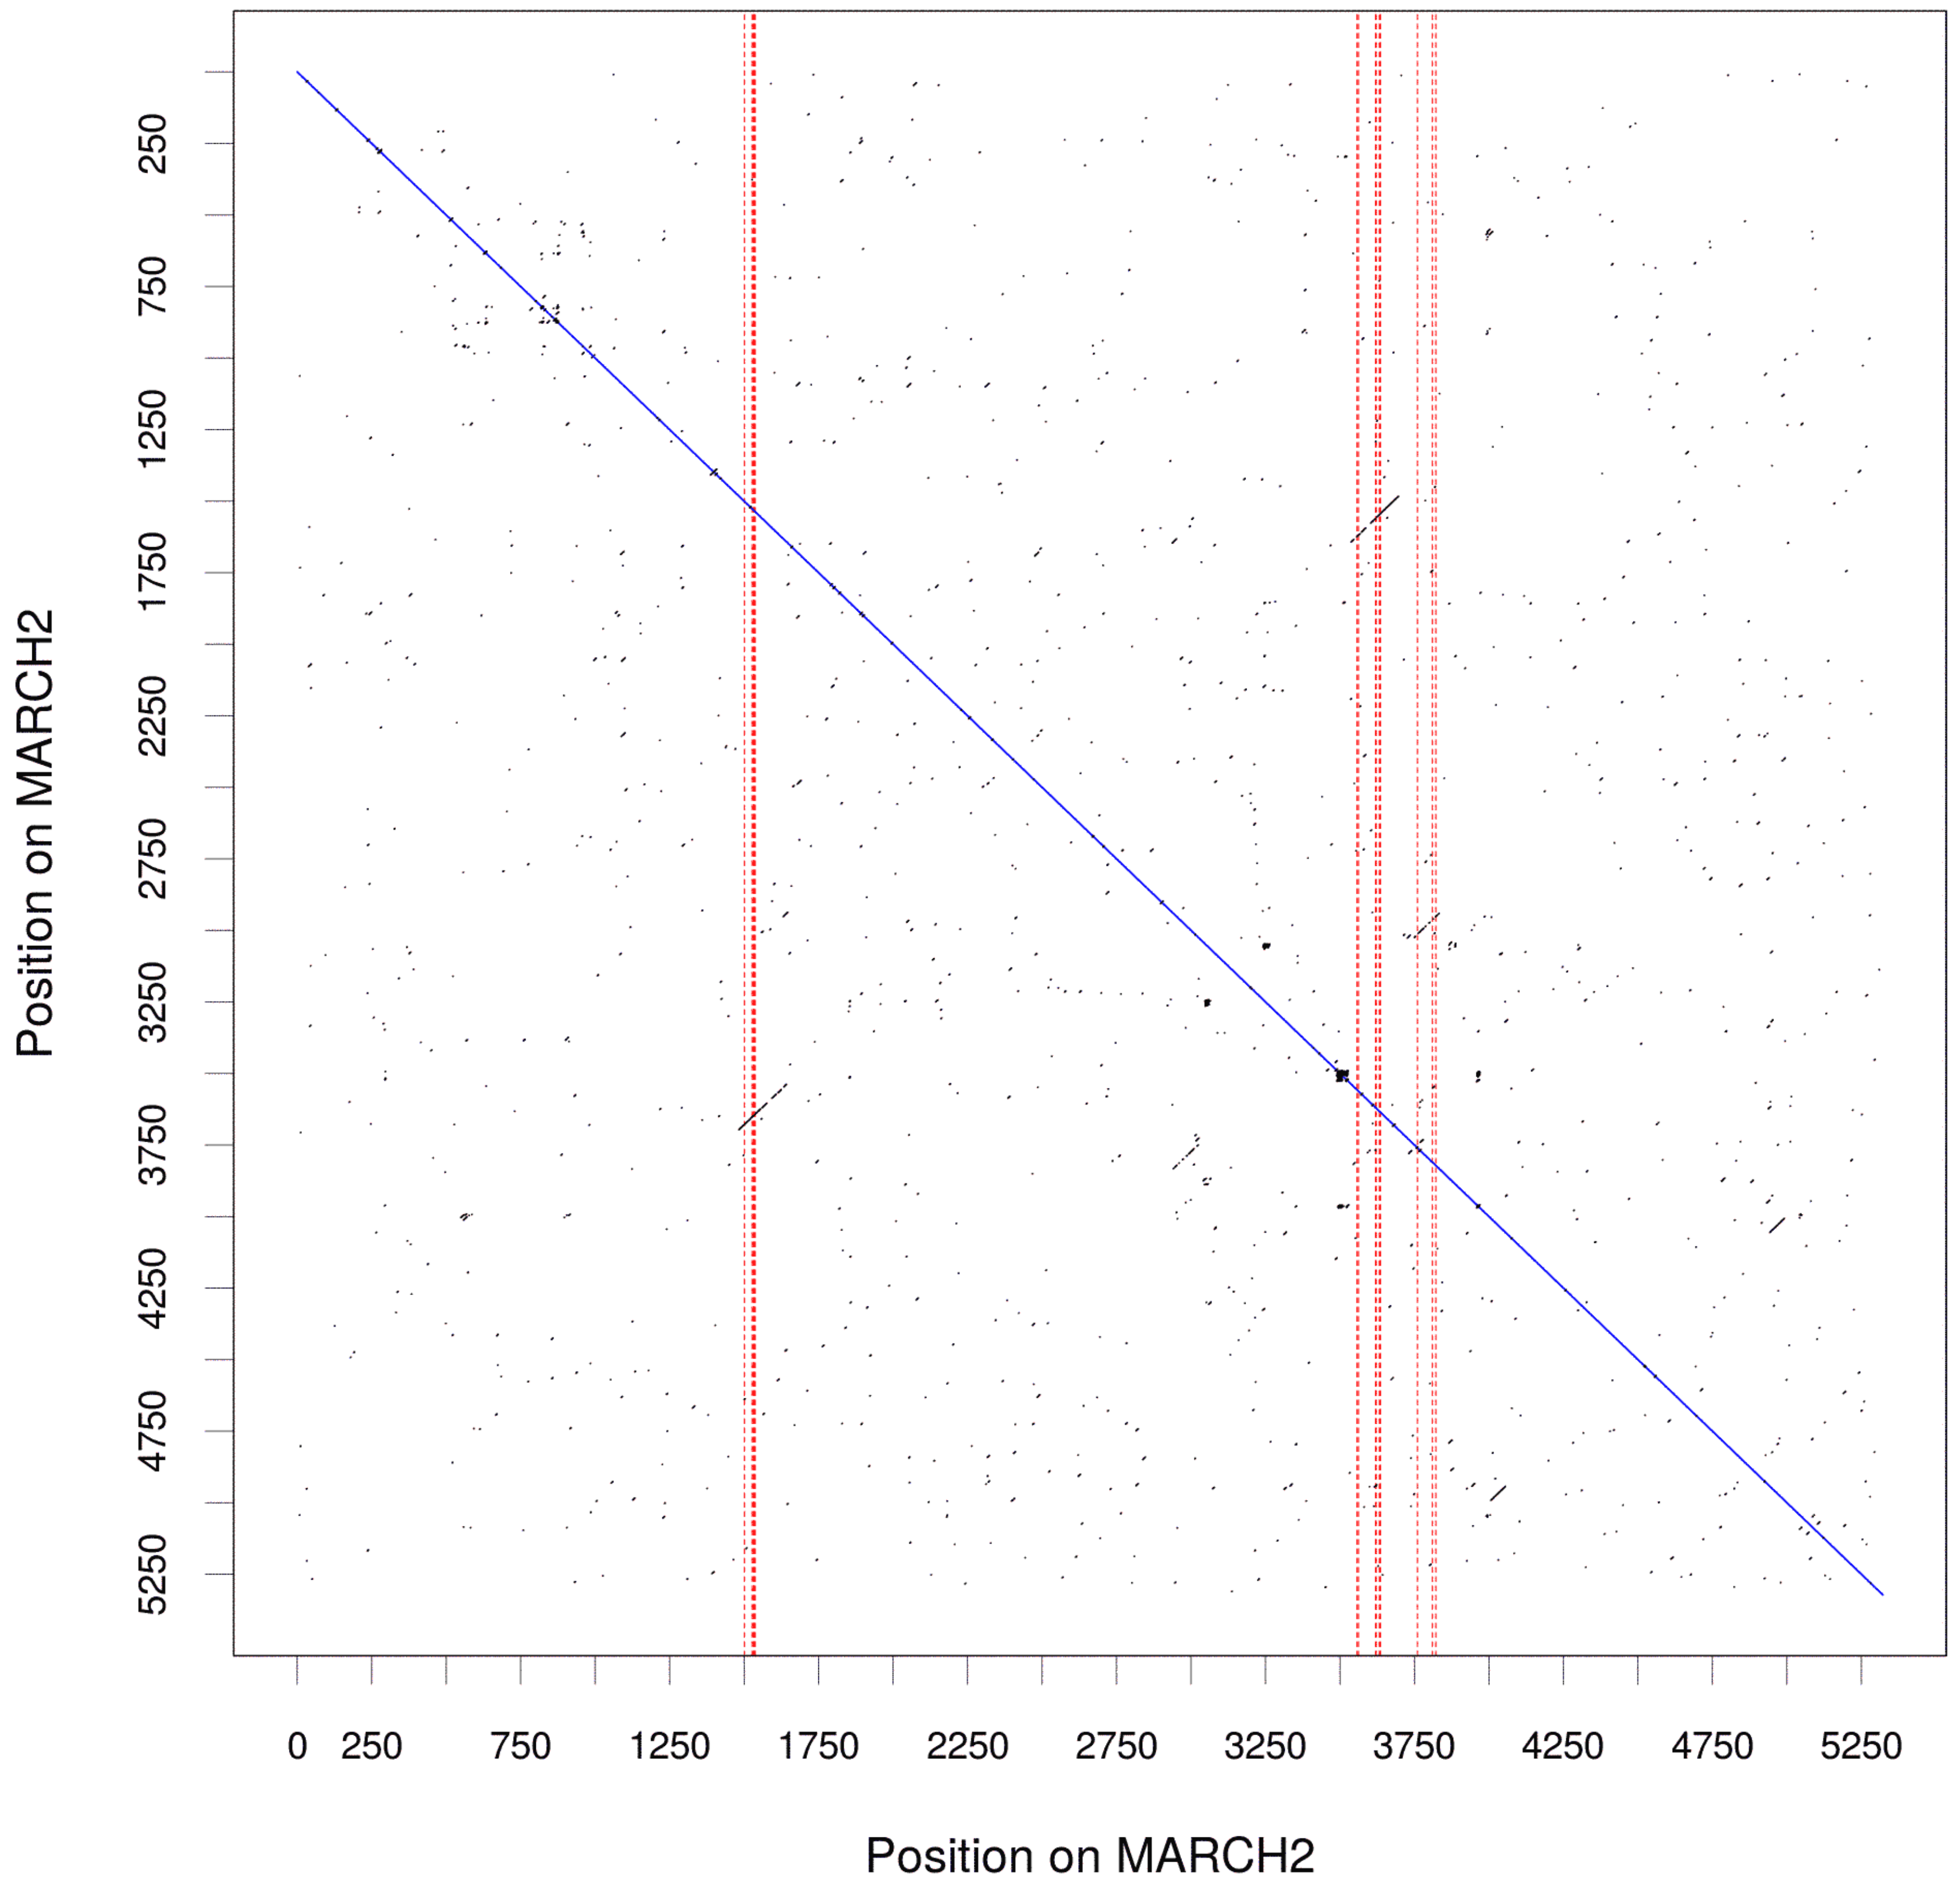

# MCC

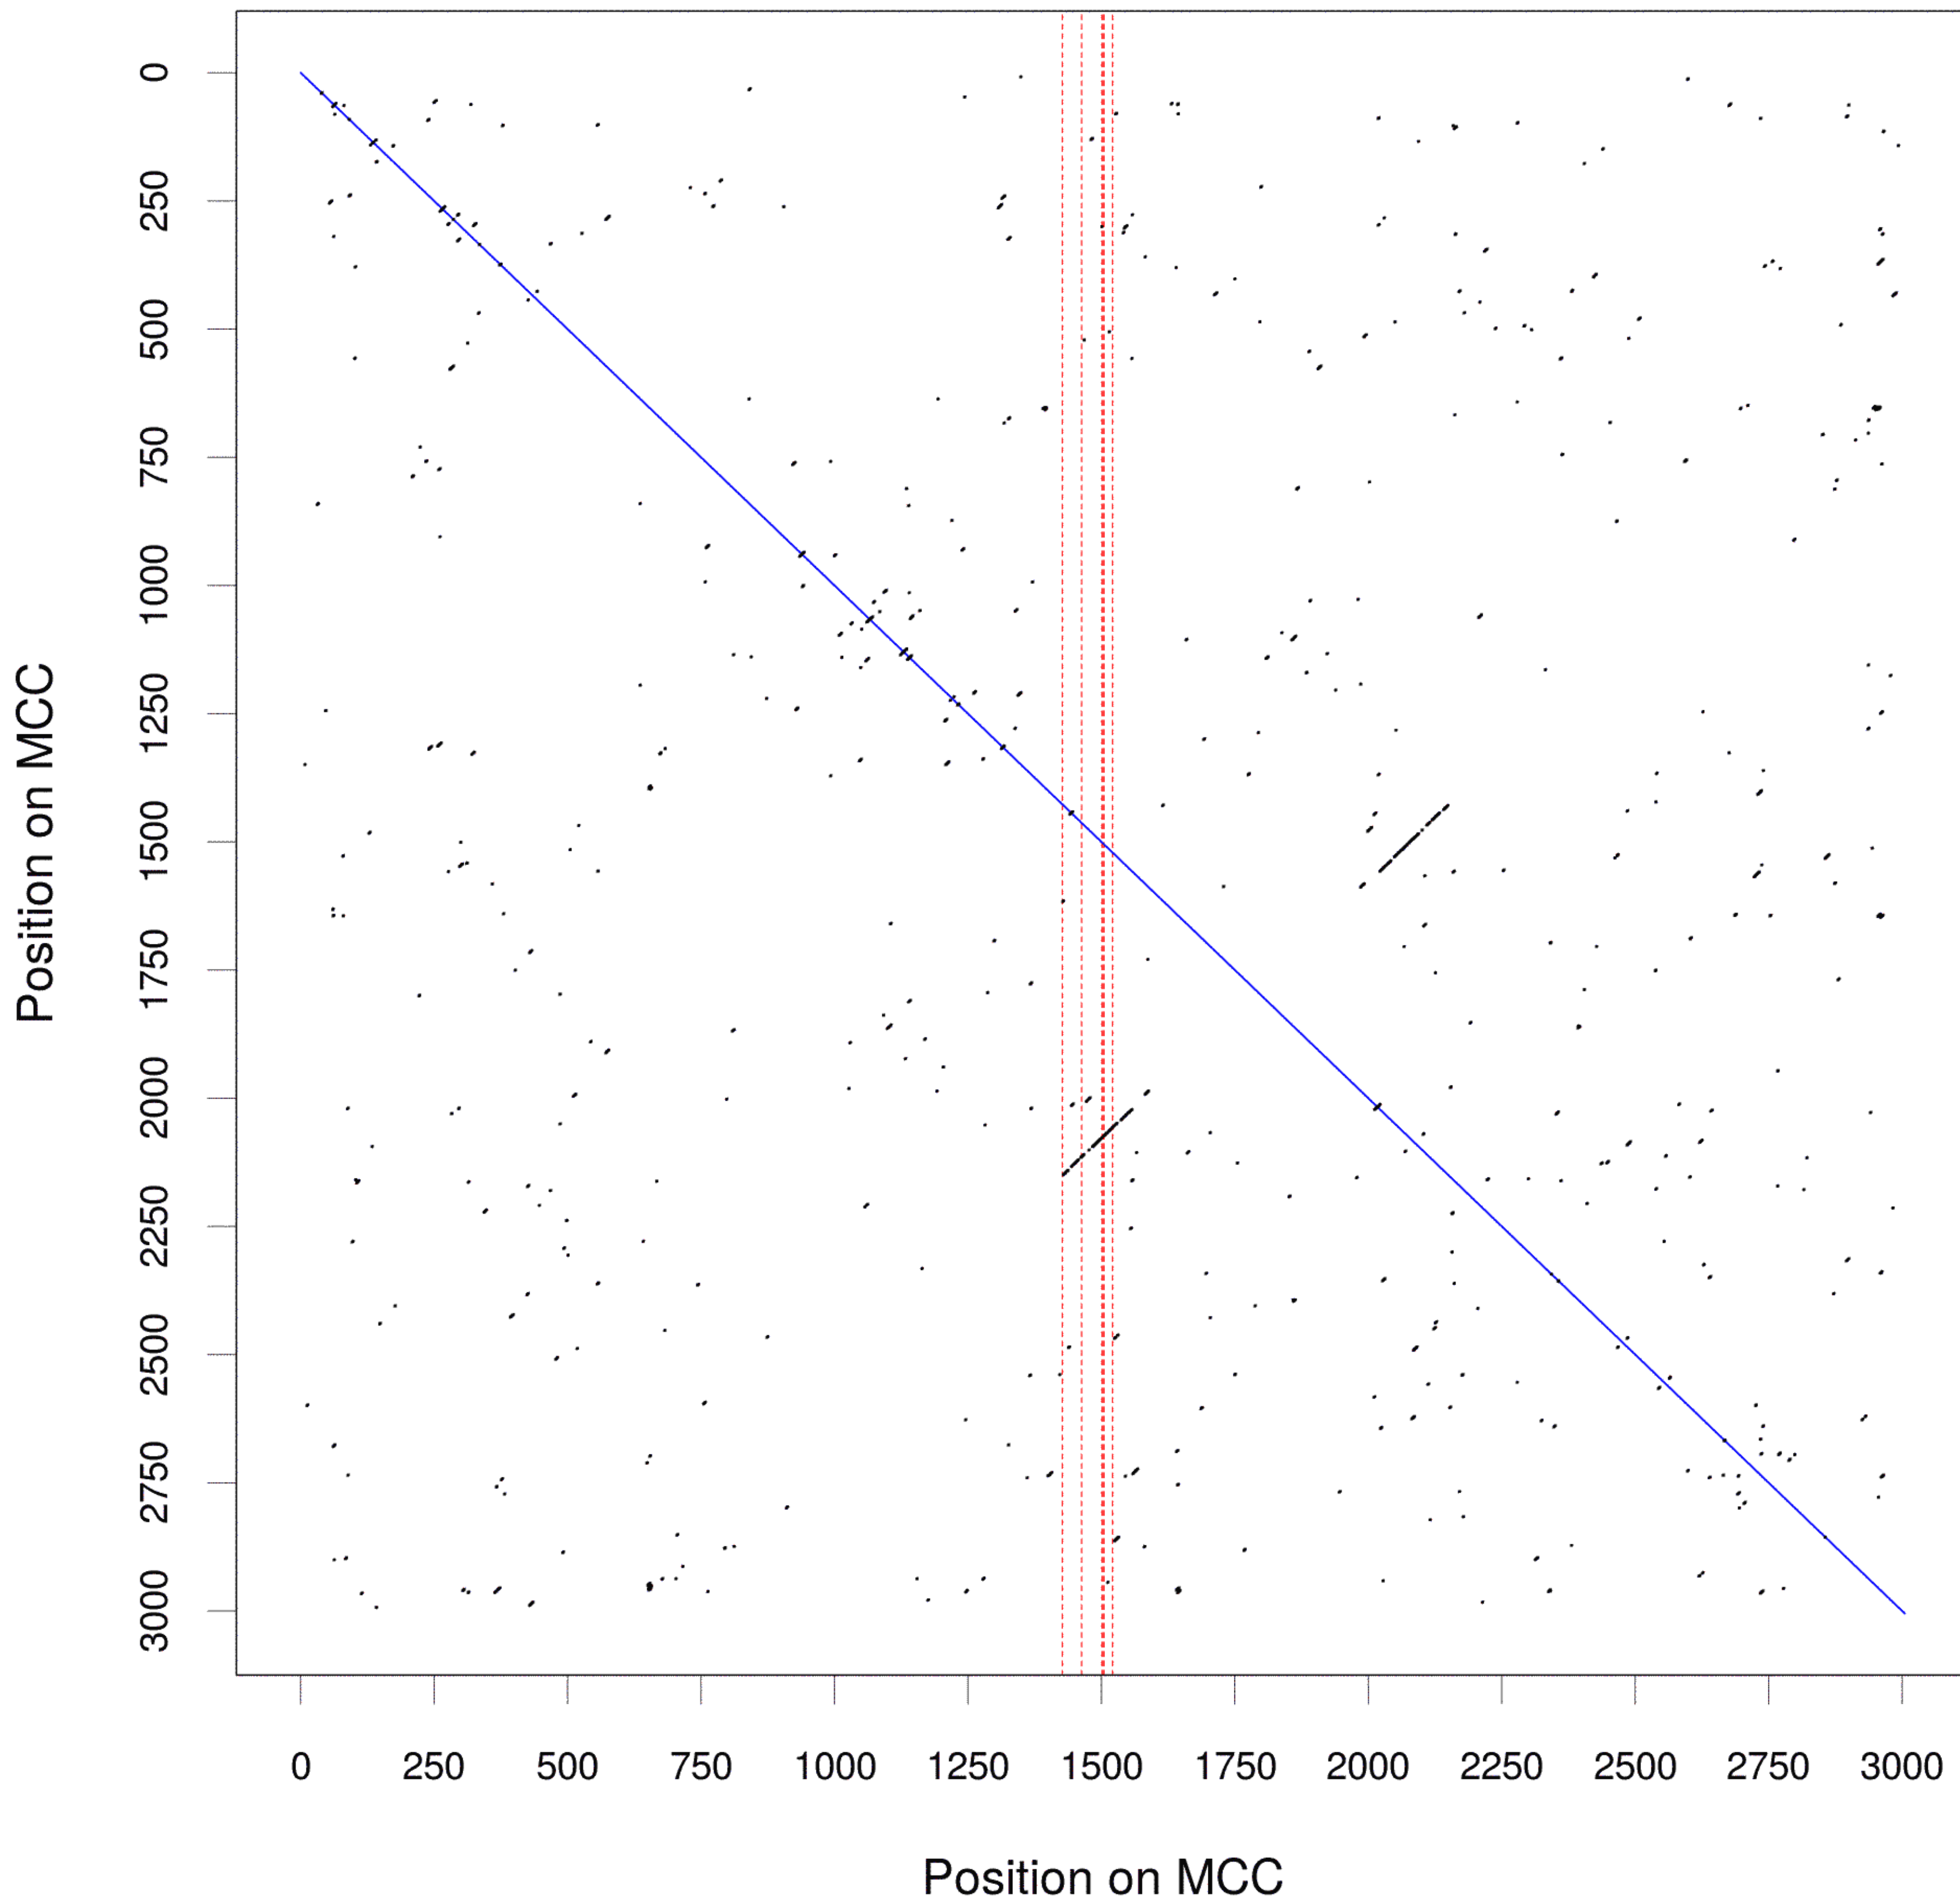



# ME3

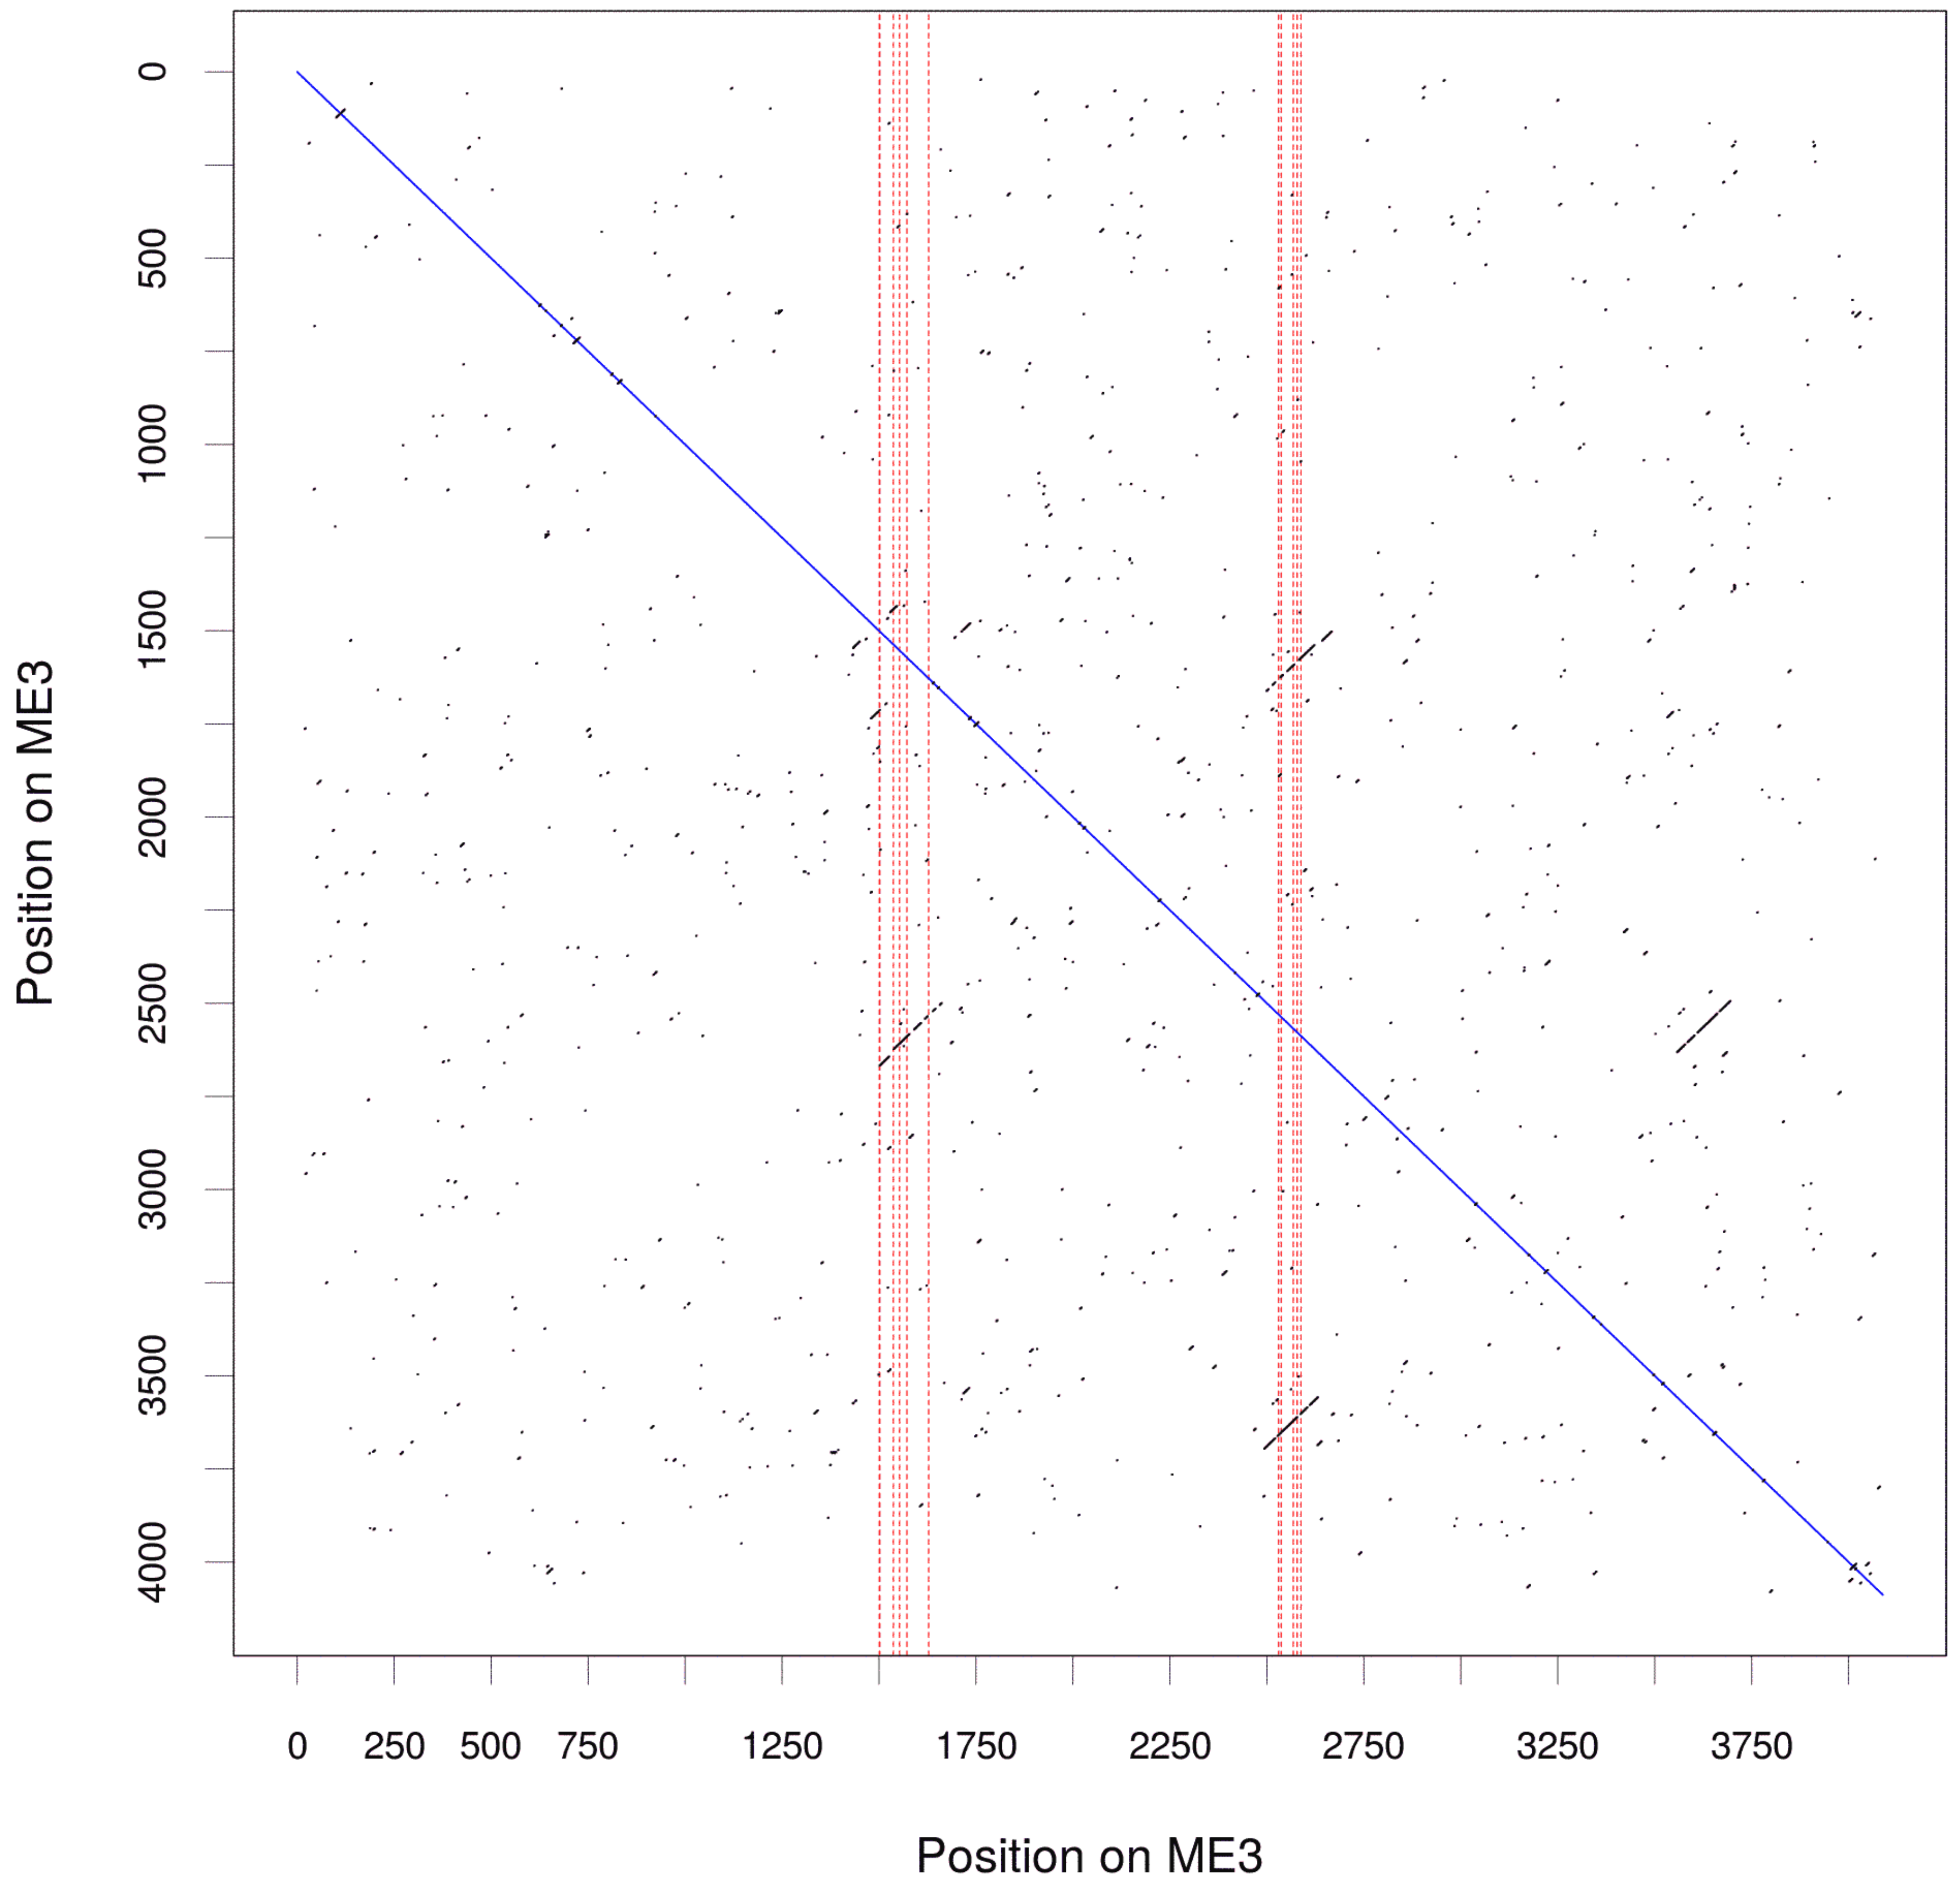

# METTL23

Position on METTL23

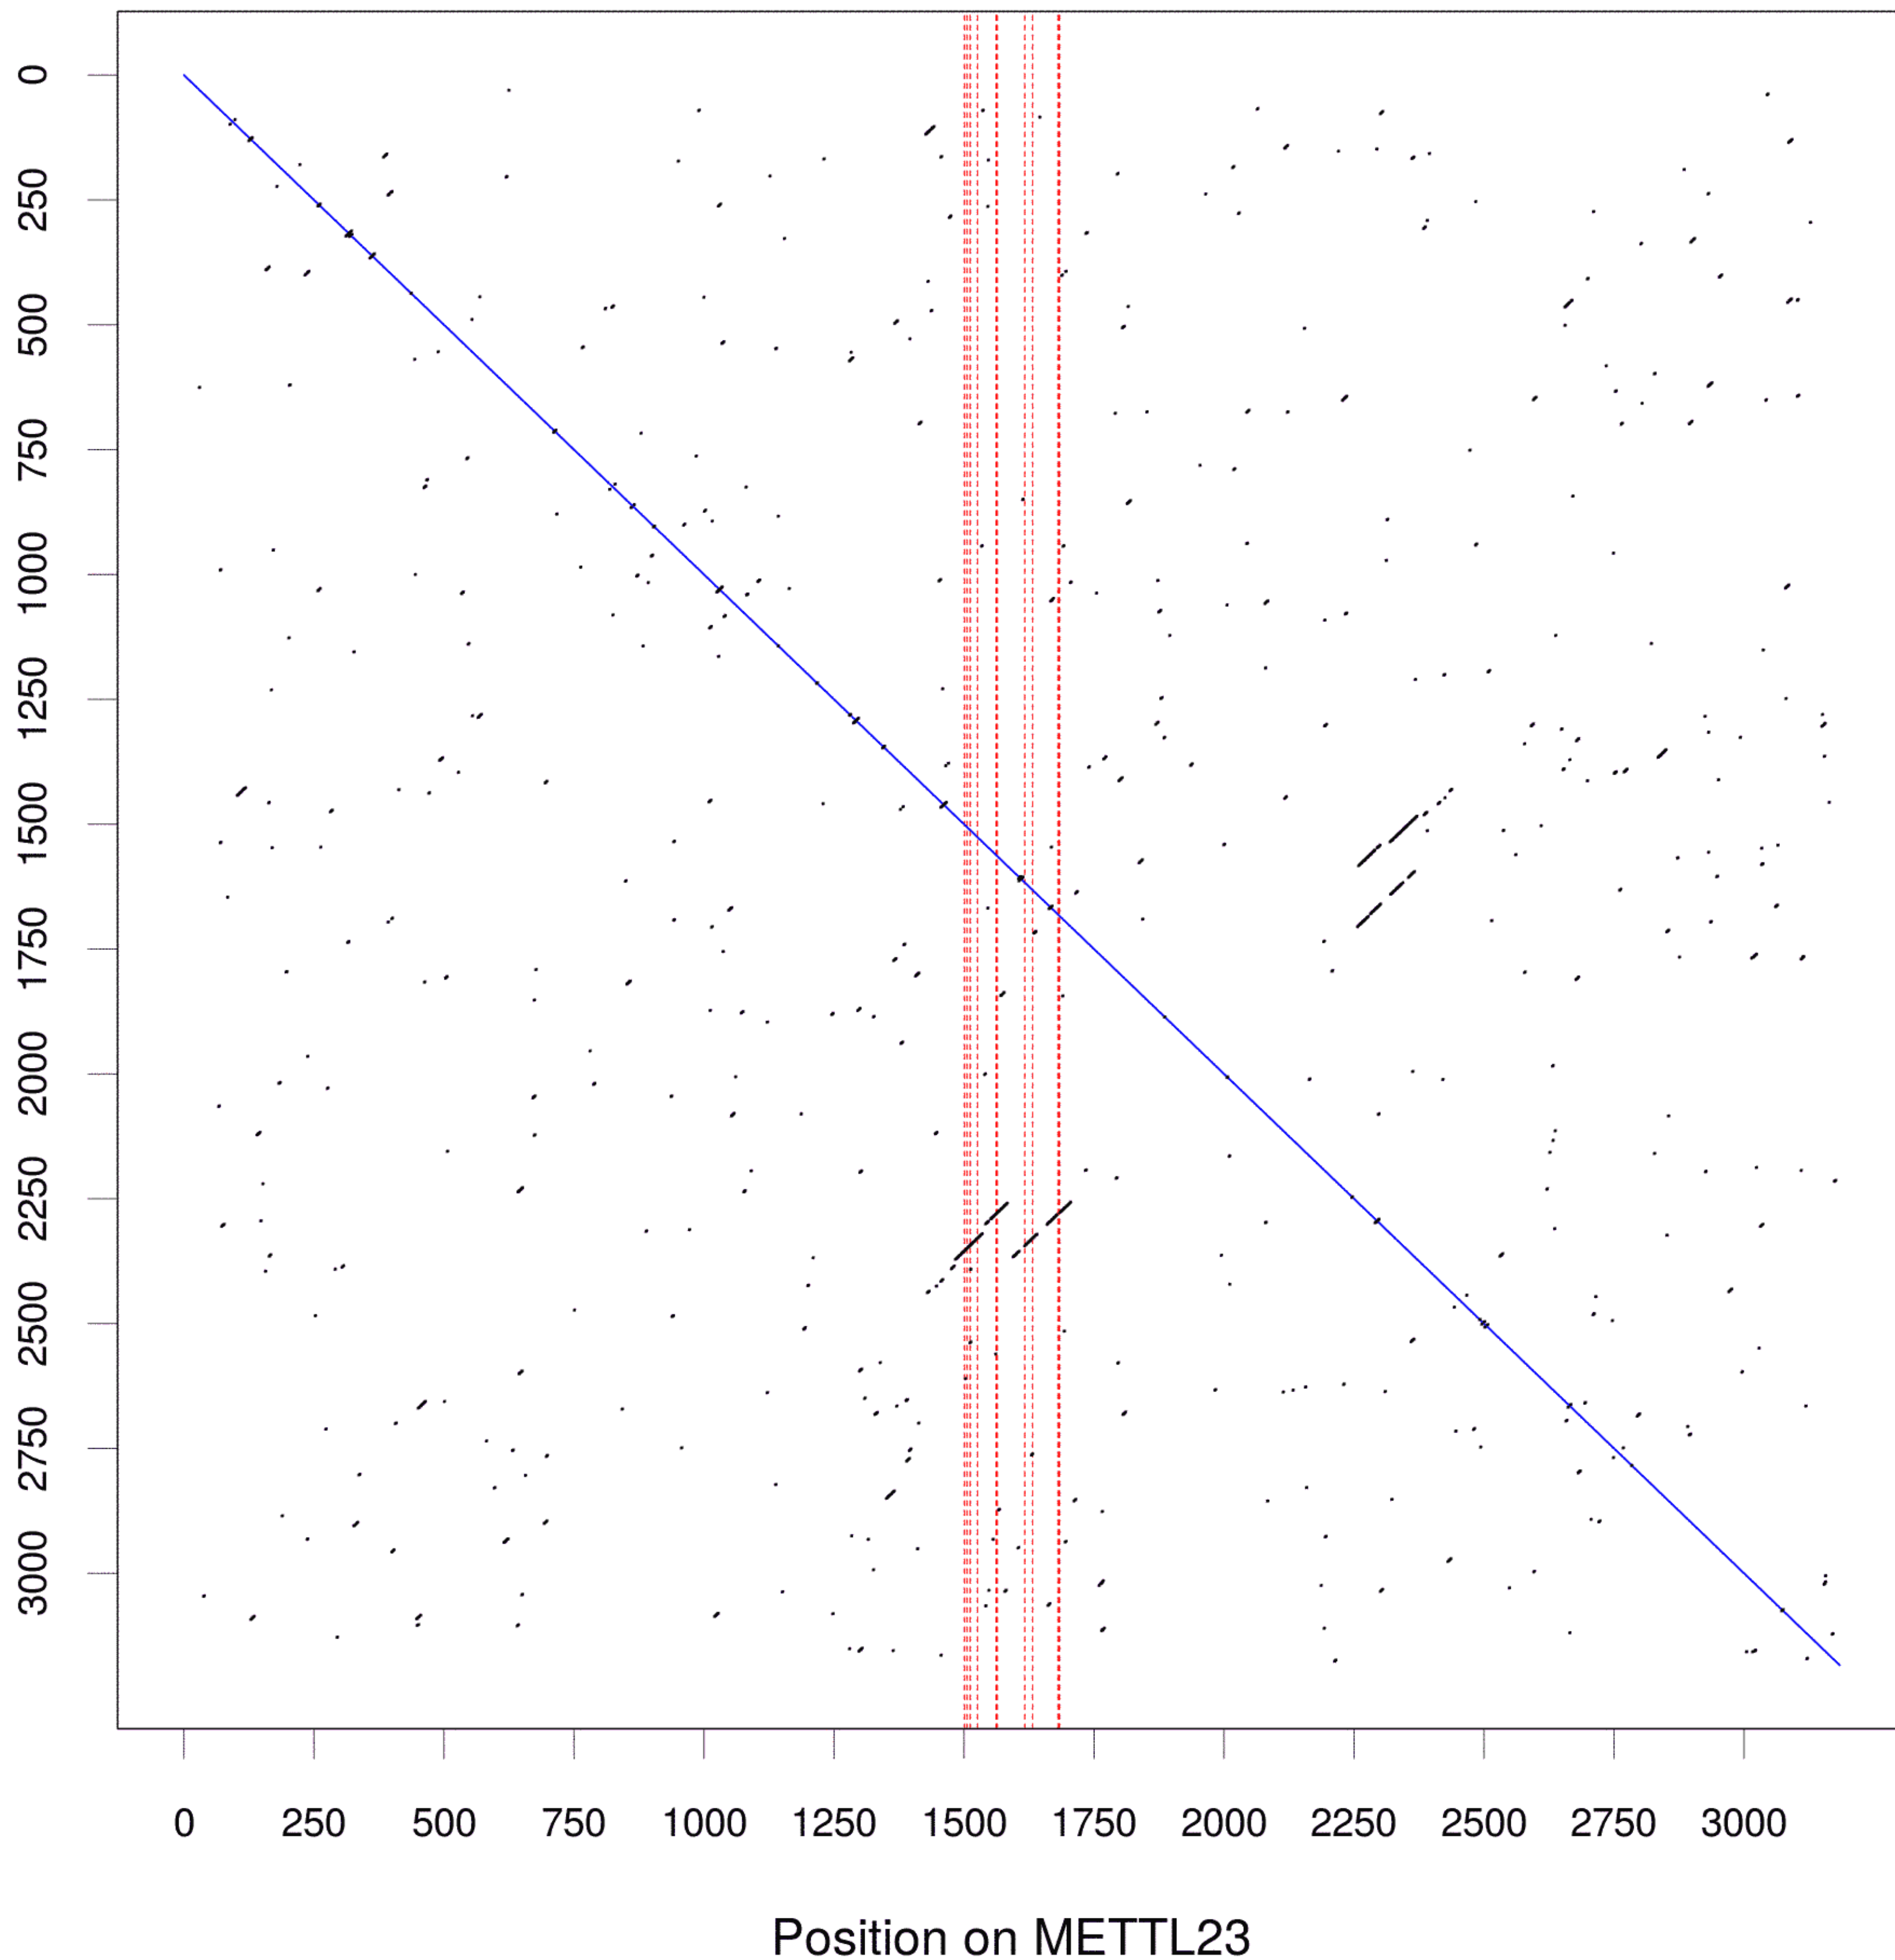

# MFSD4A

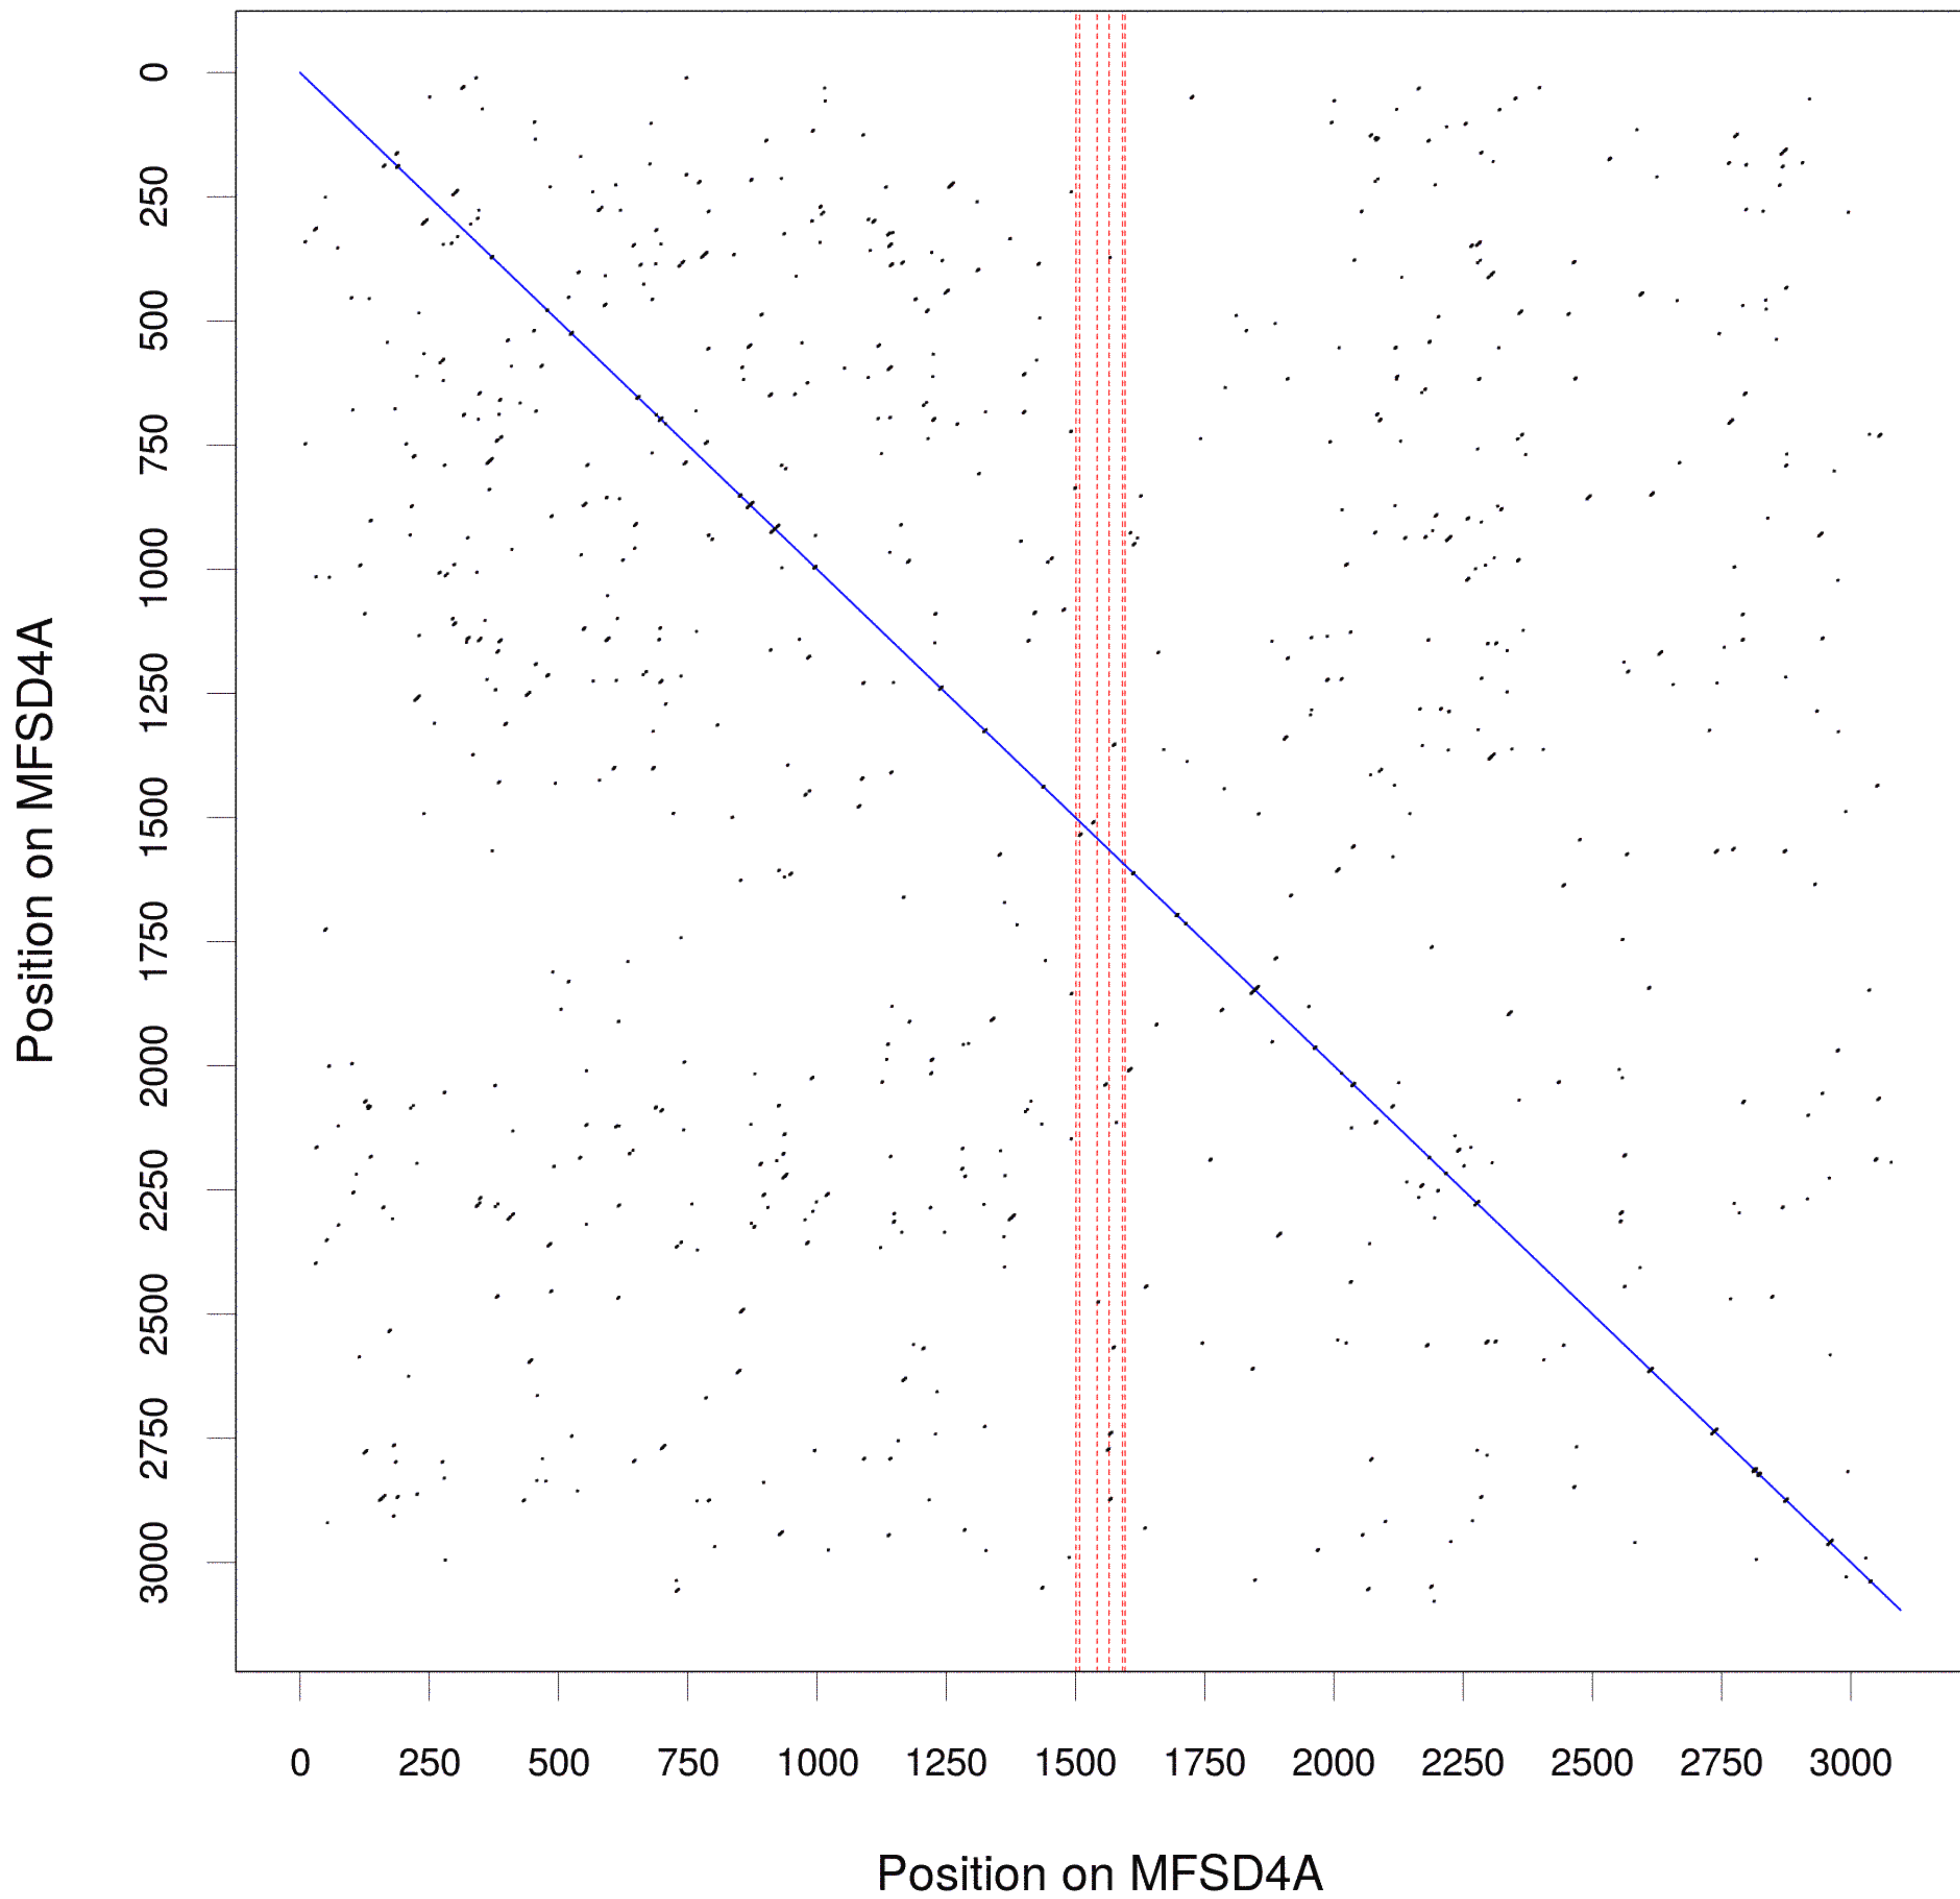

# MOCS1

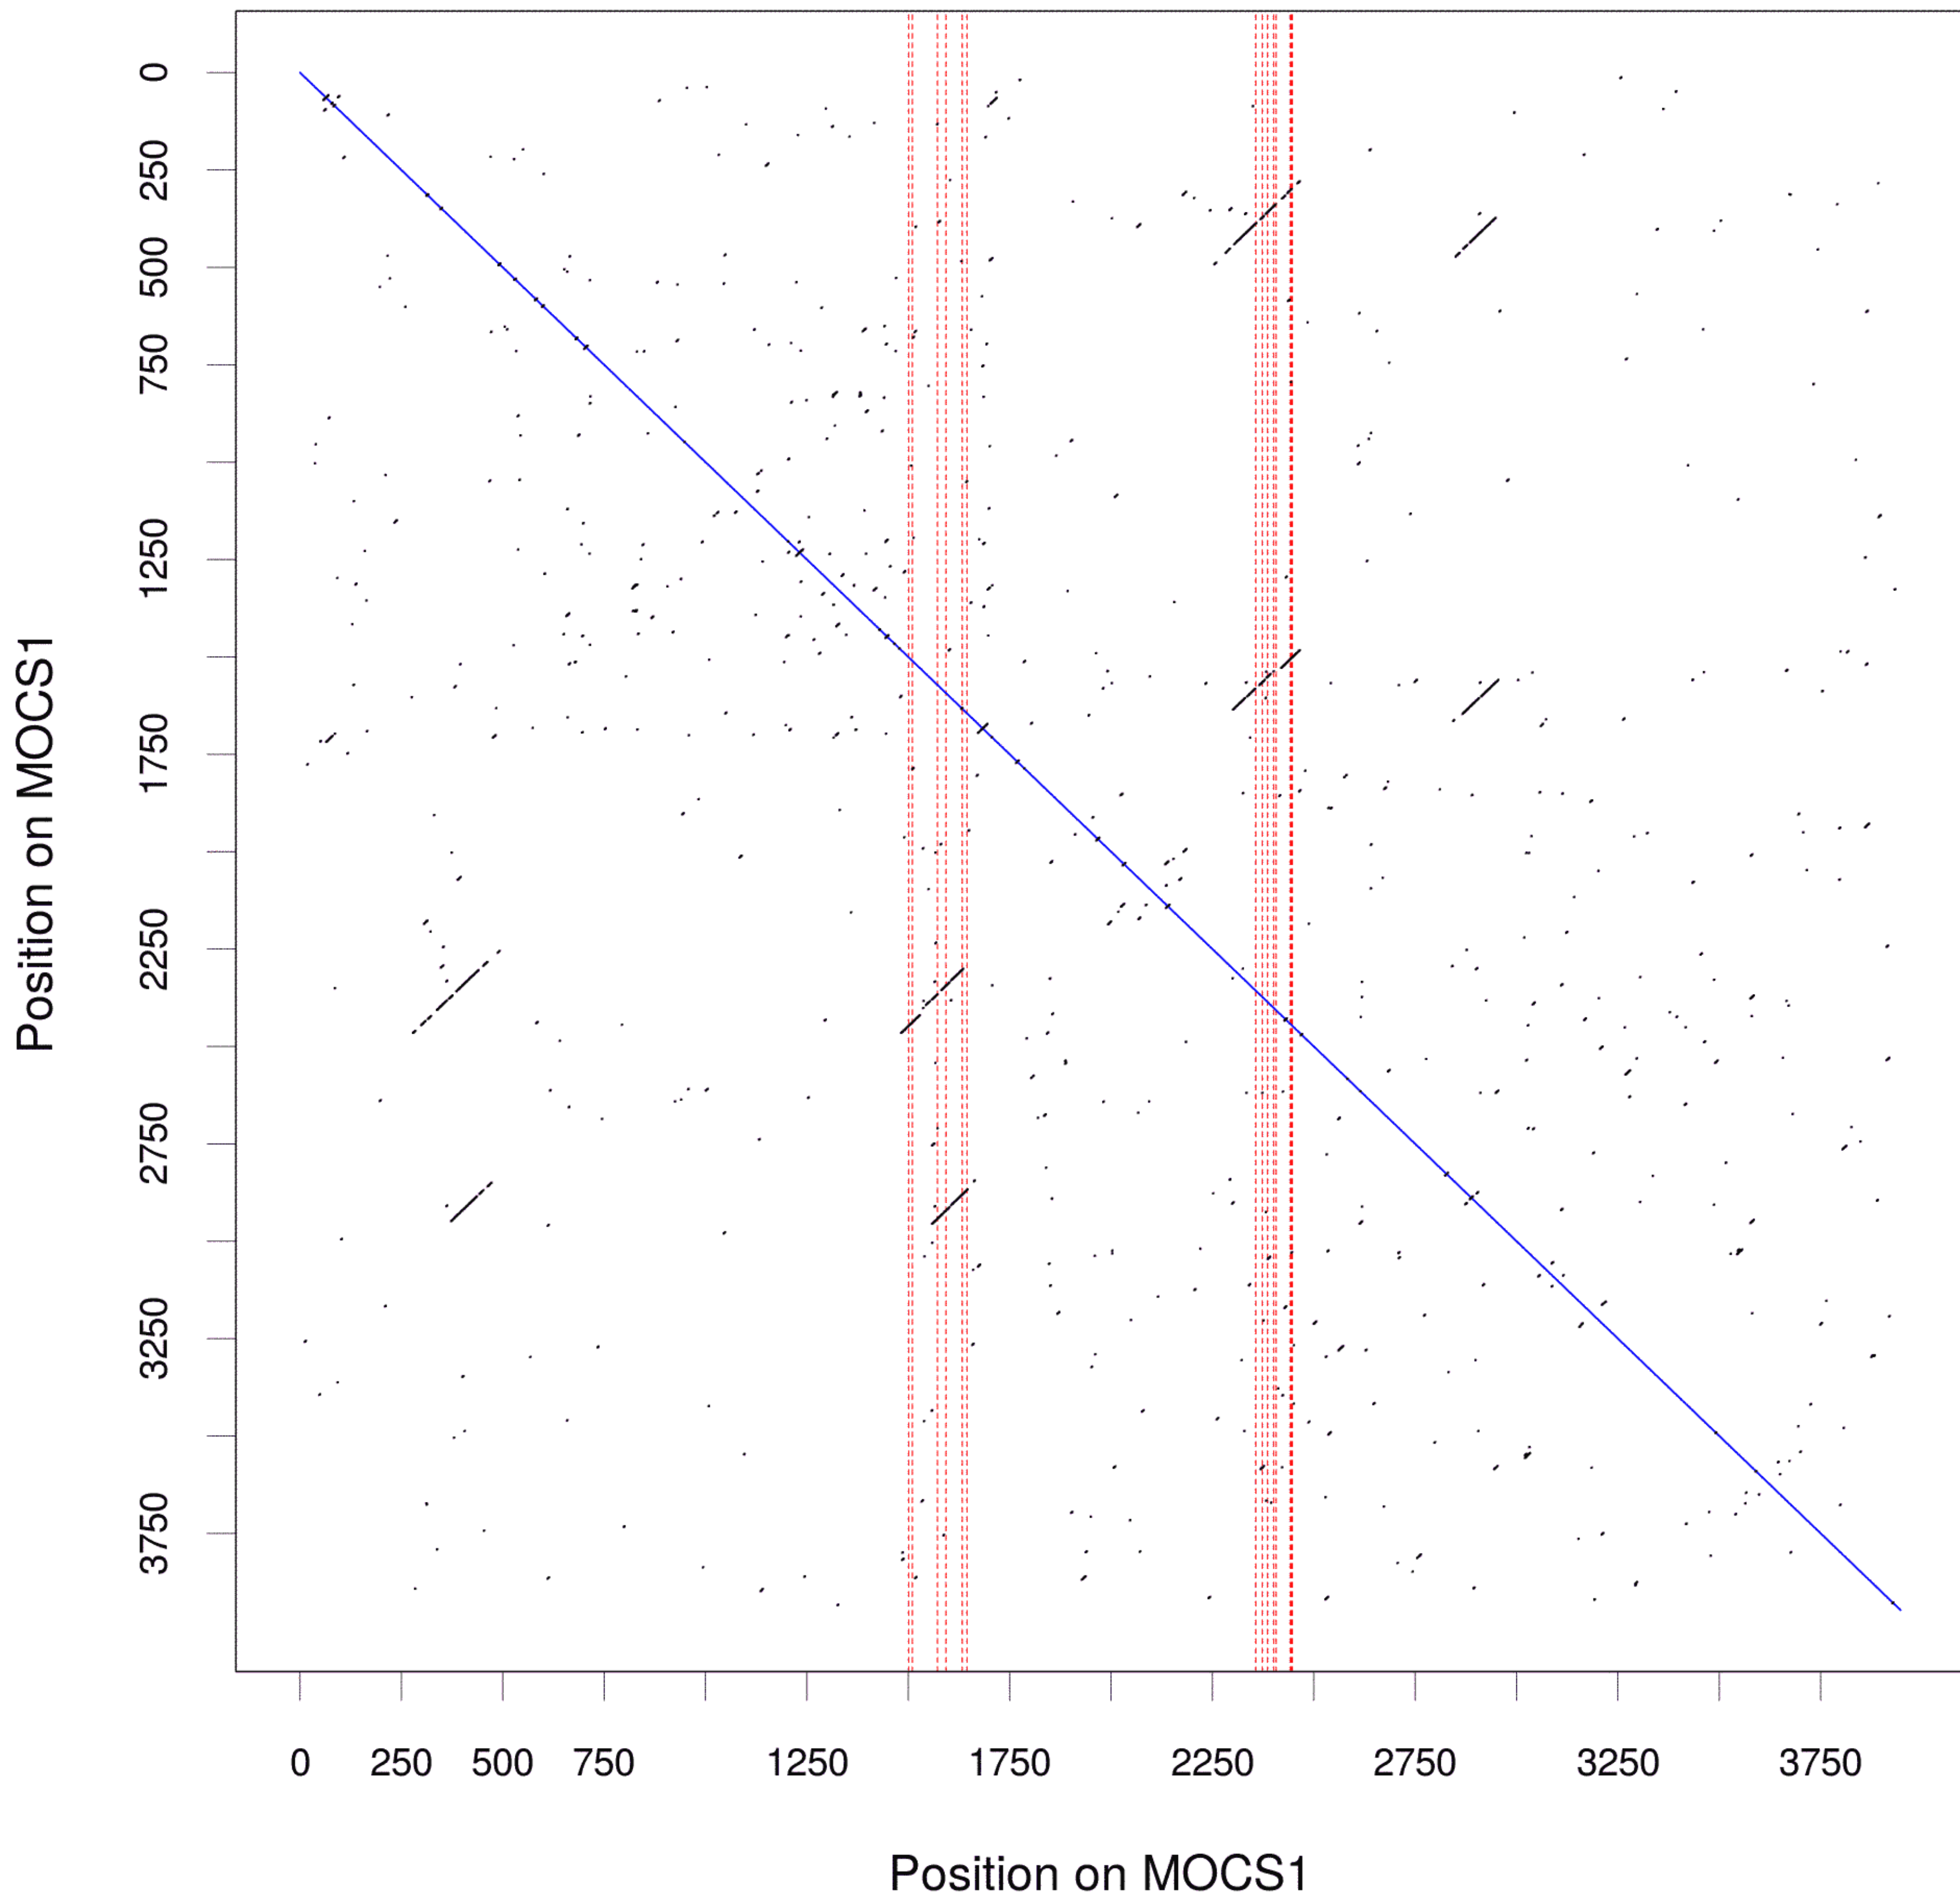

# MPND

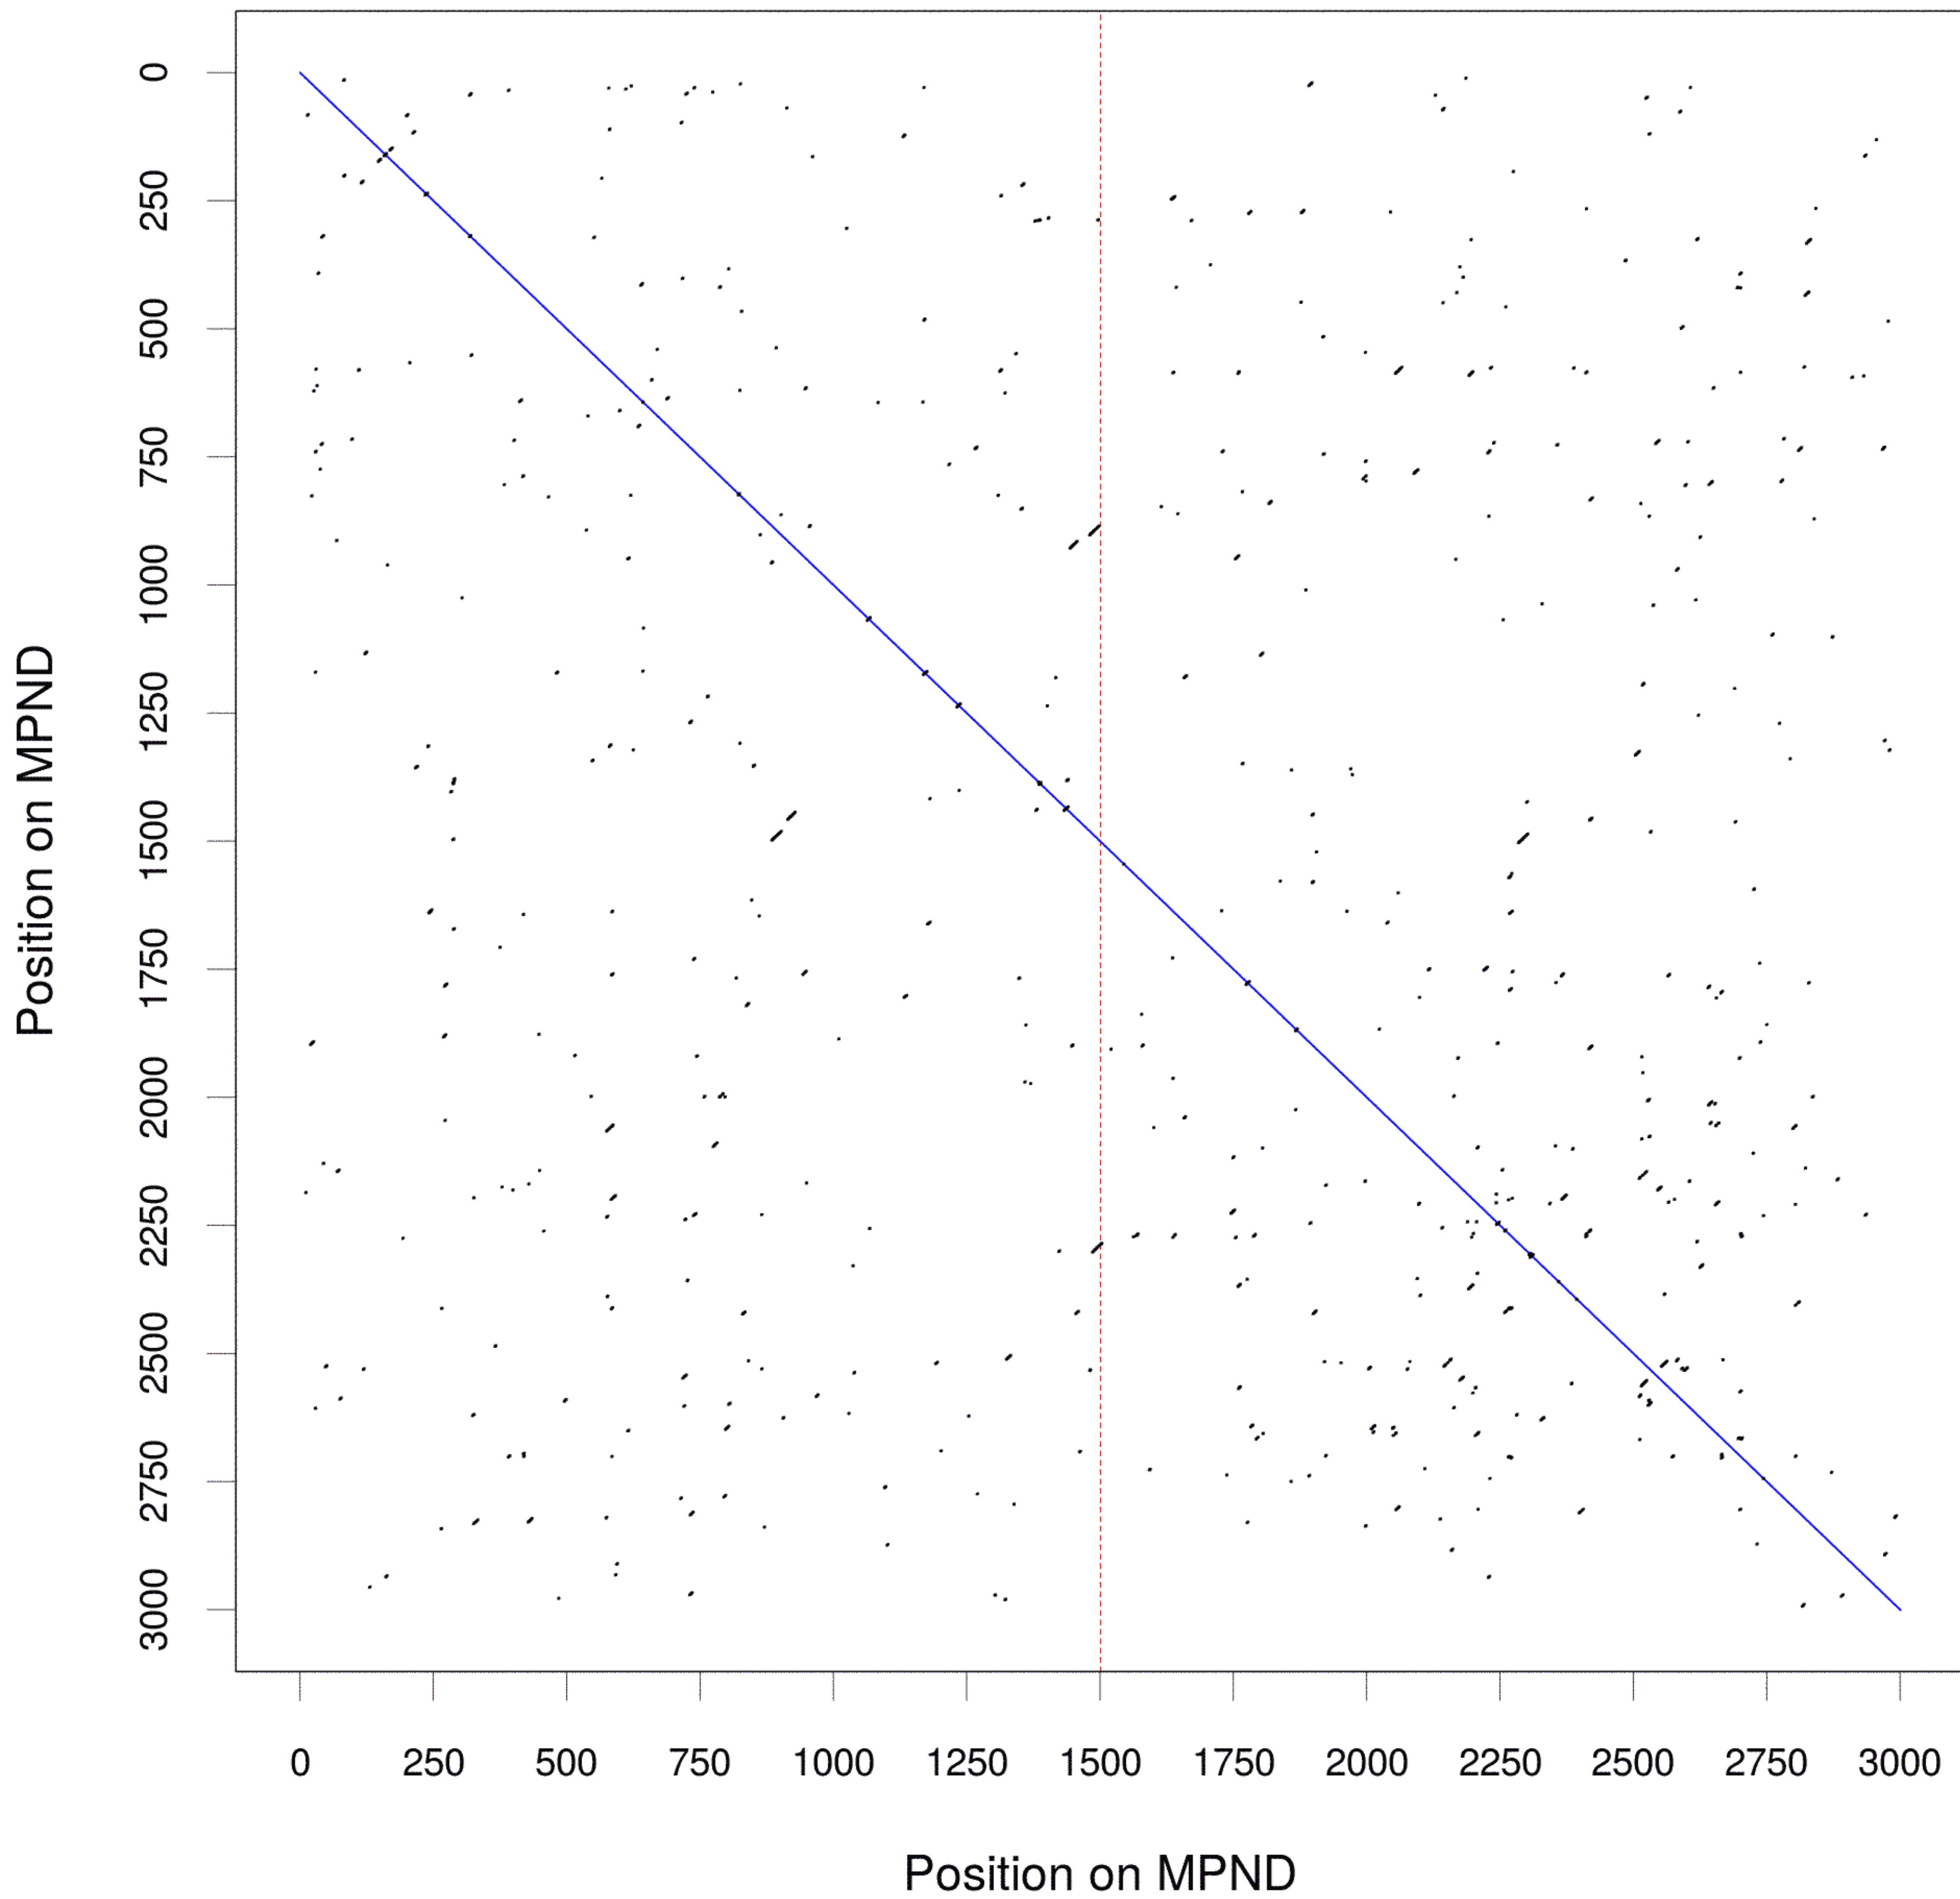

# MPST

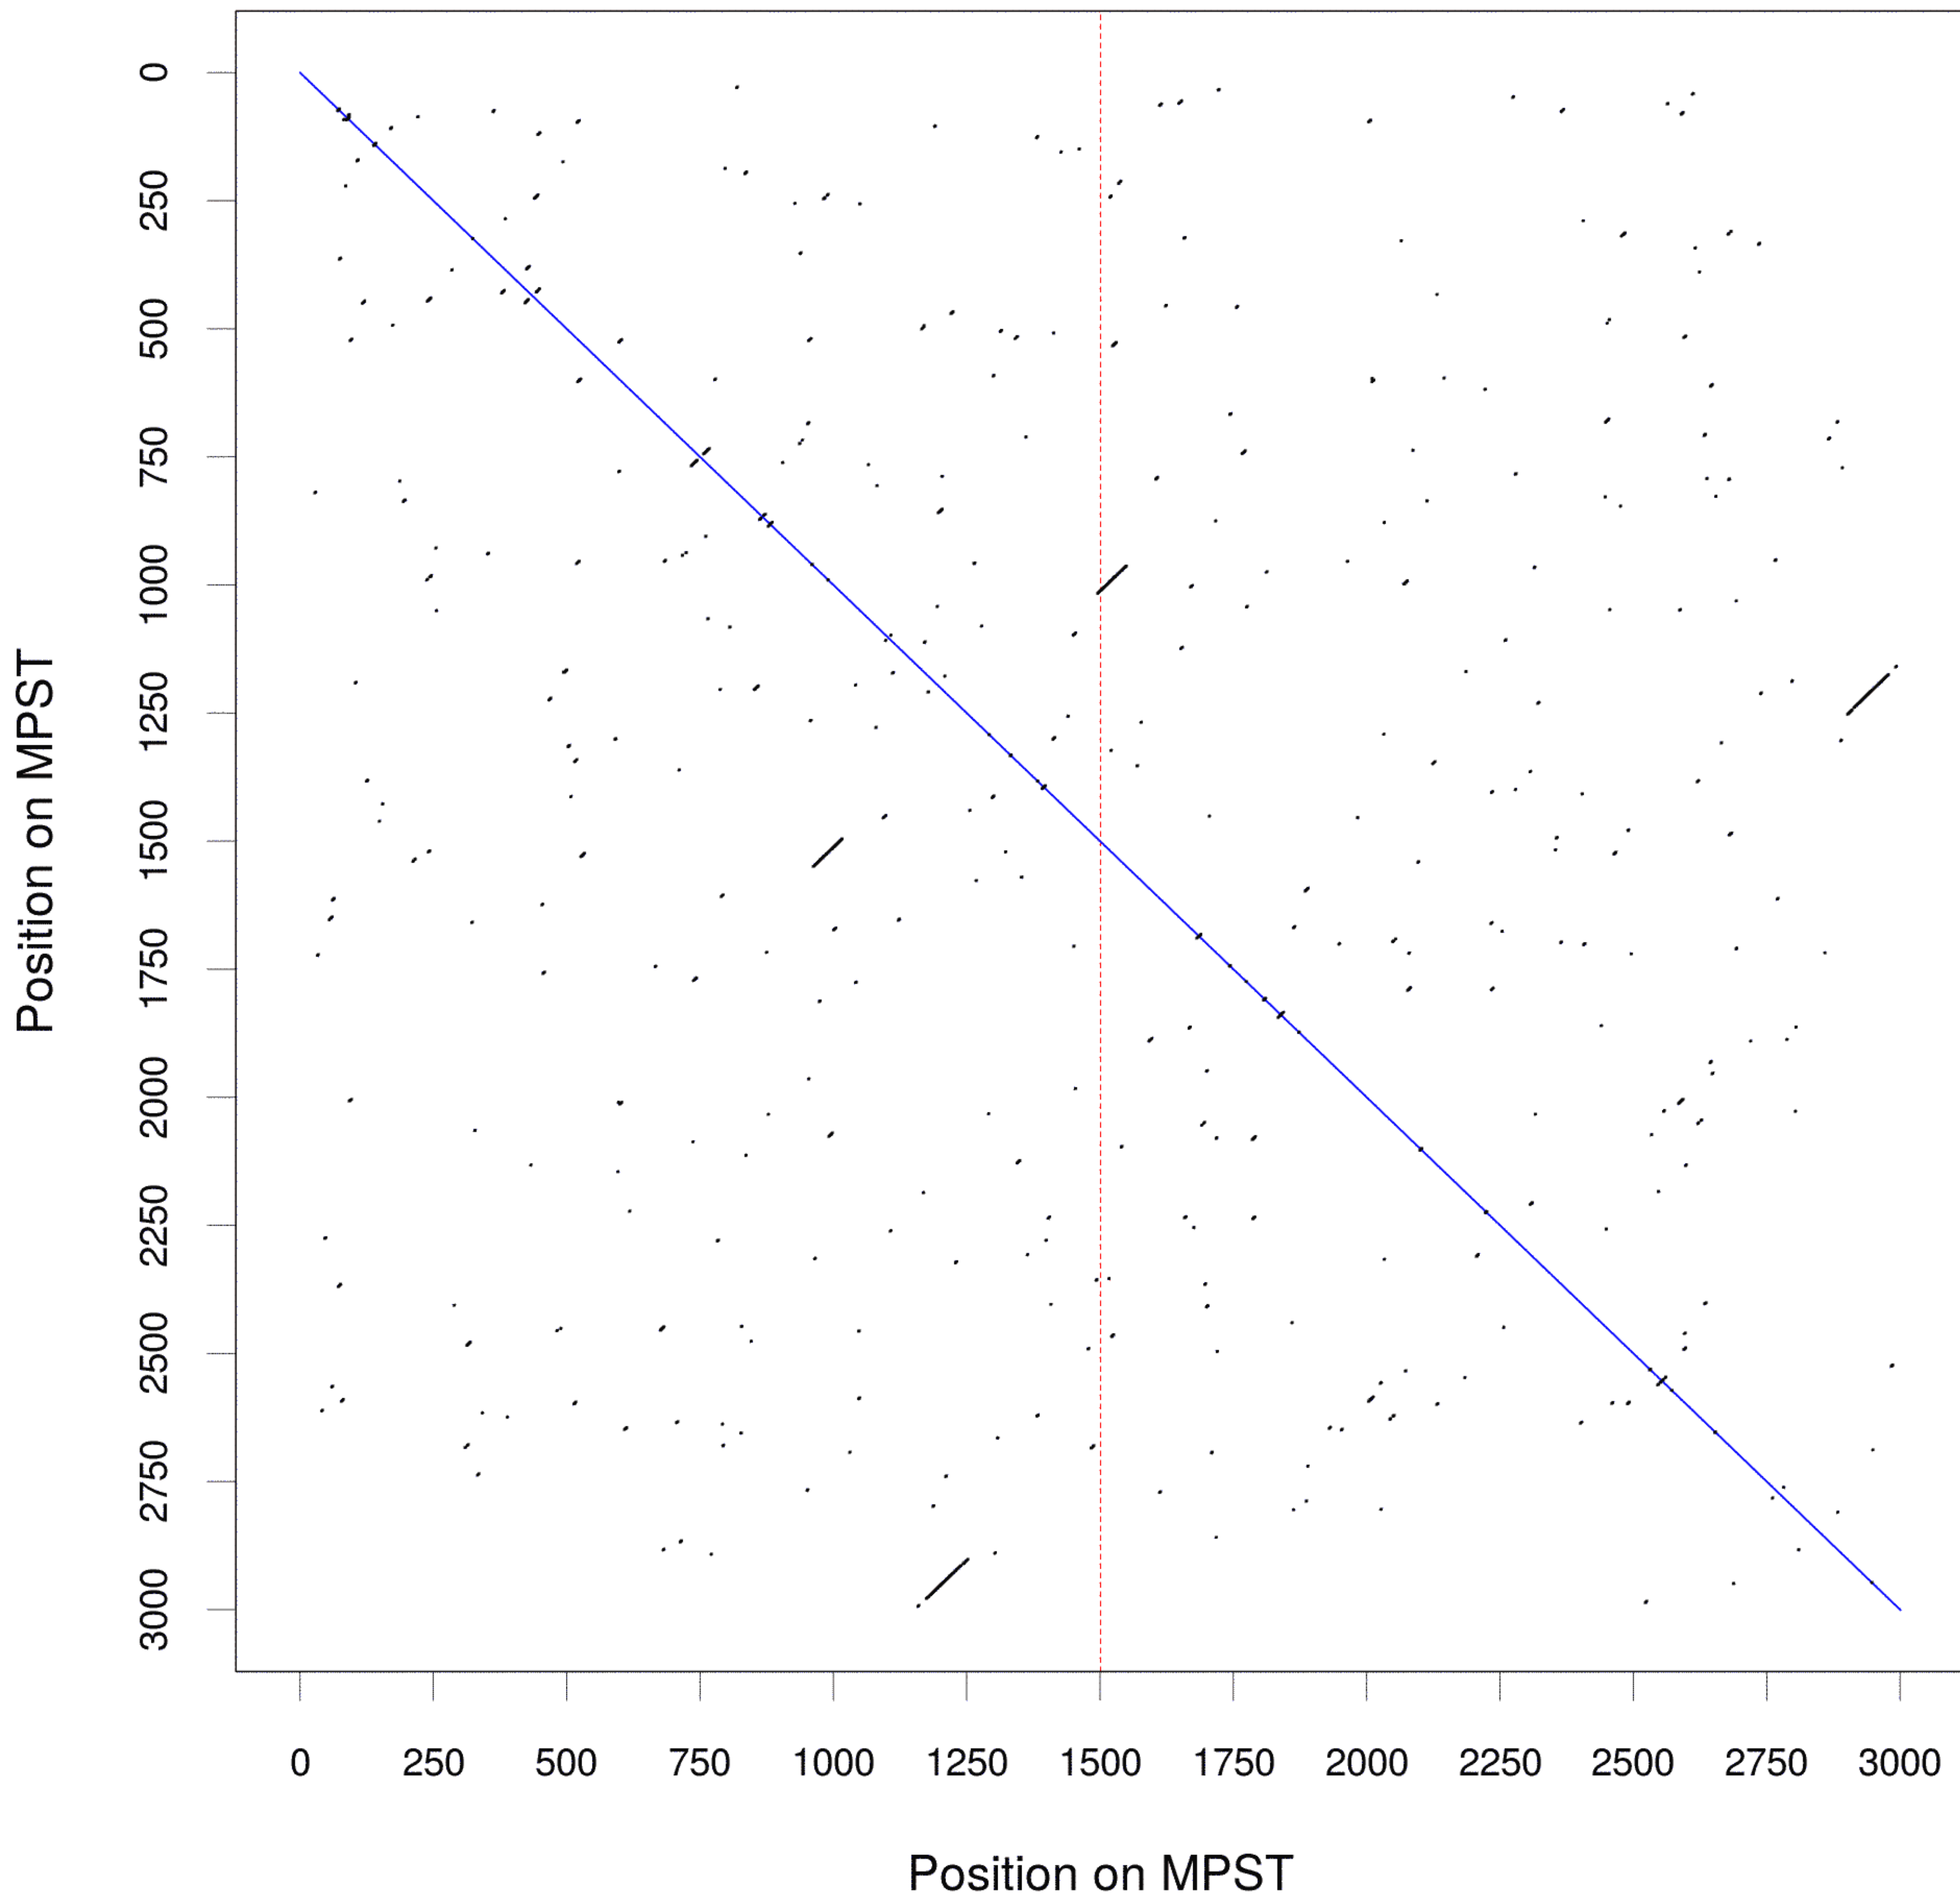

# MRPL51

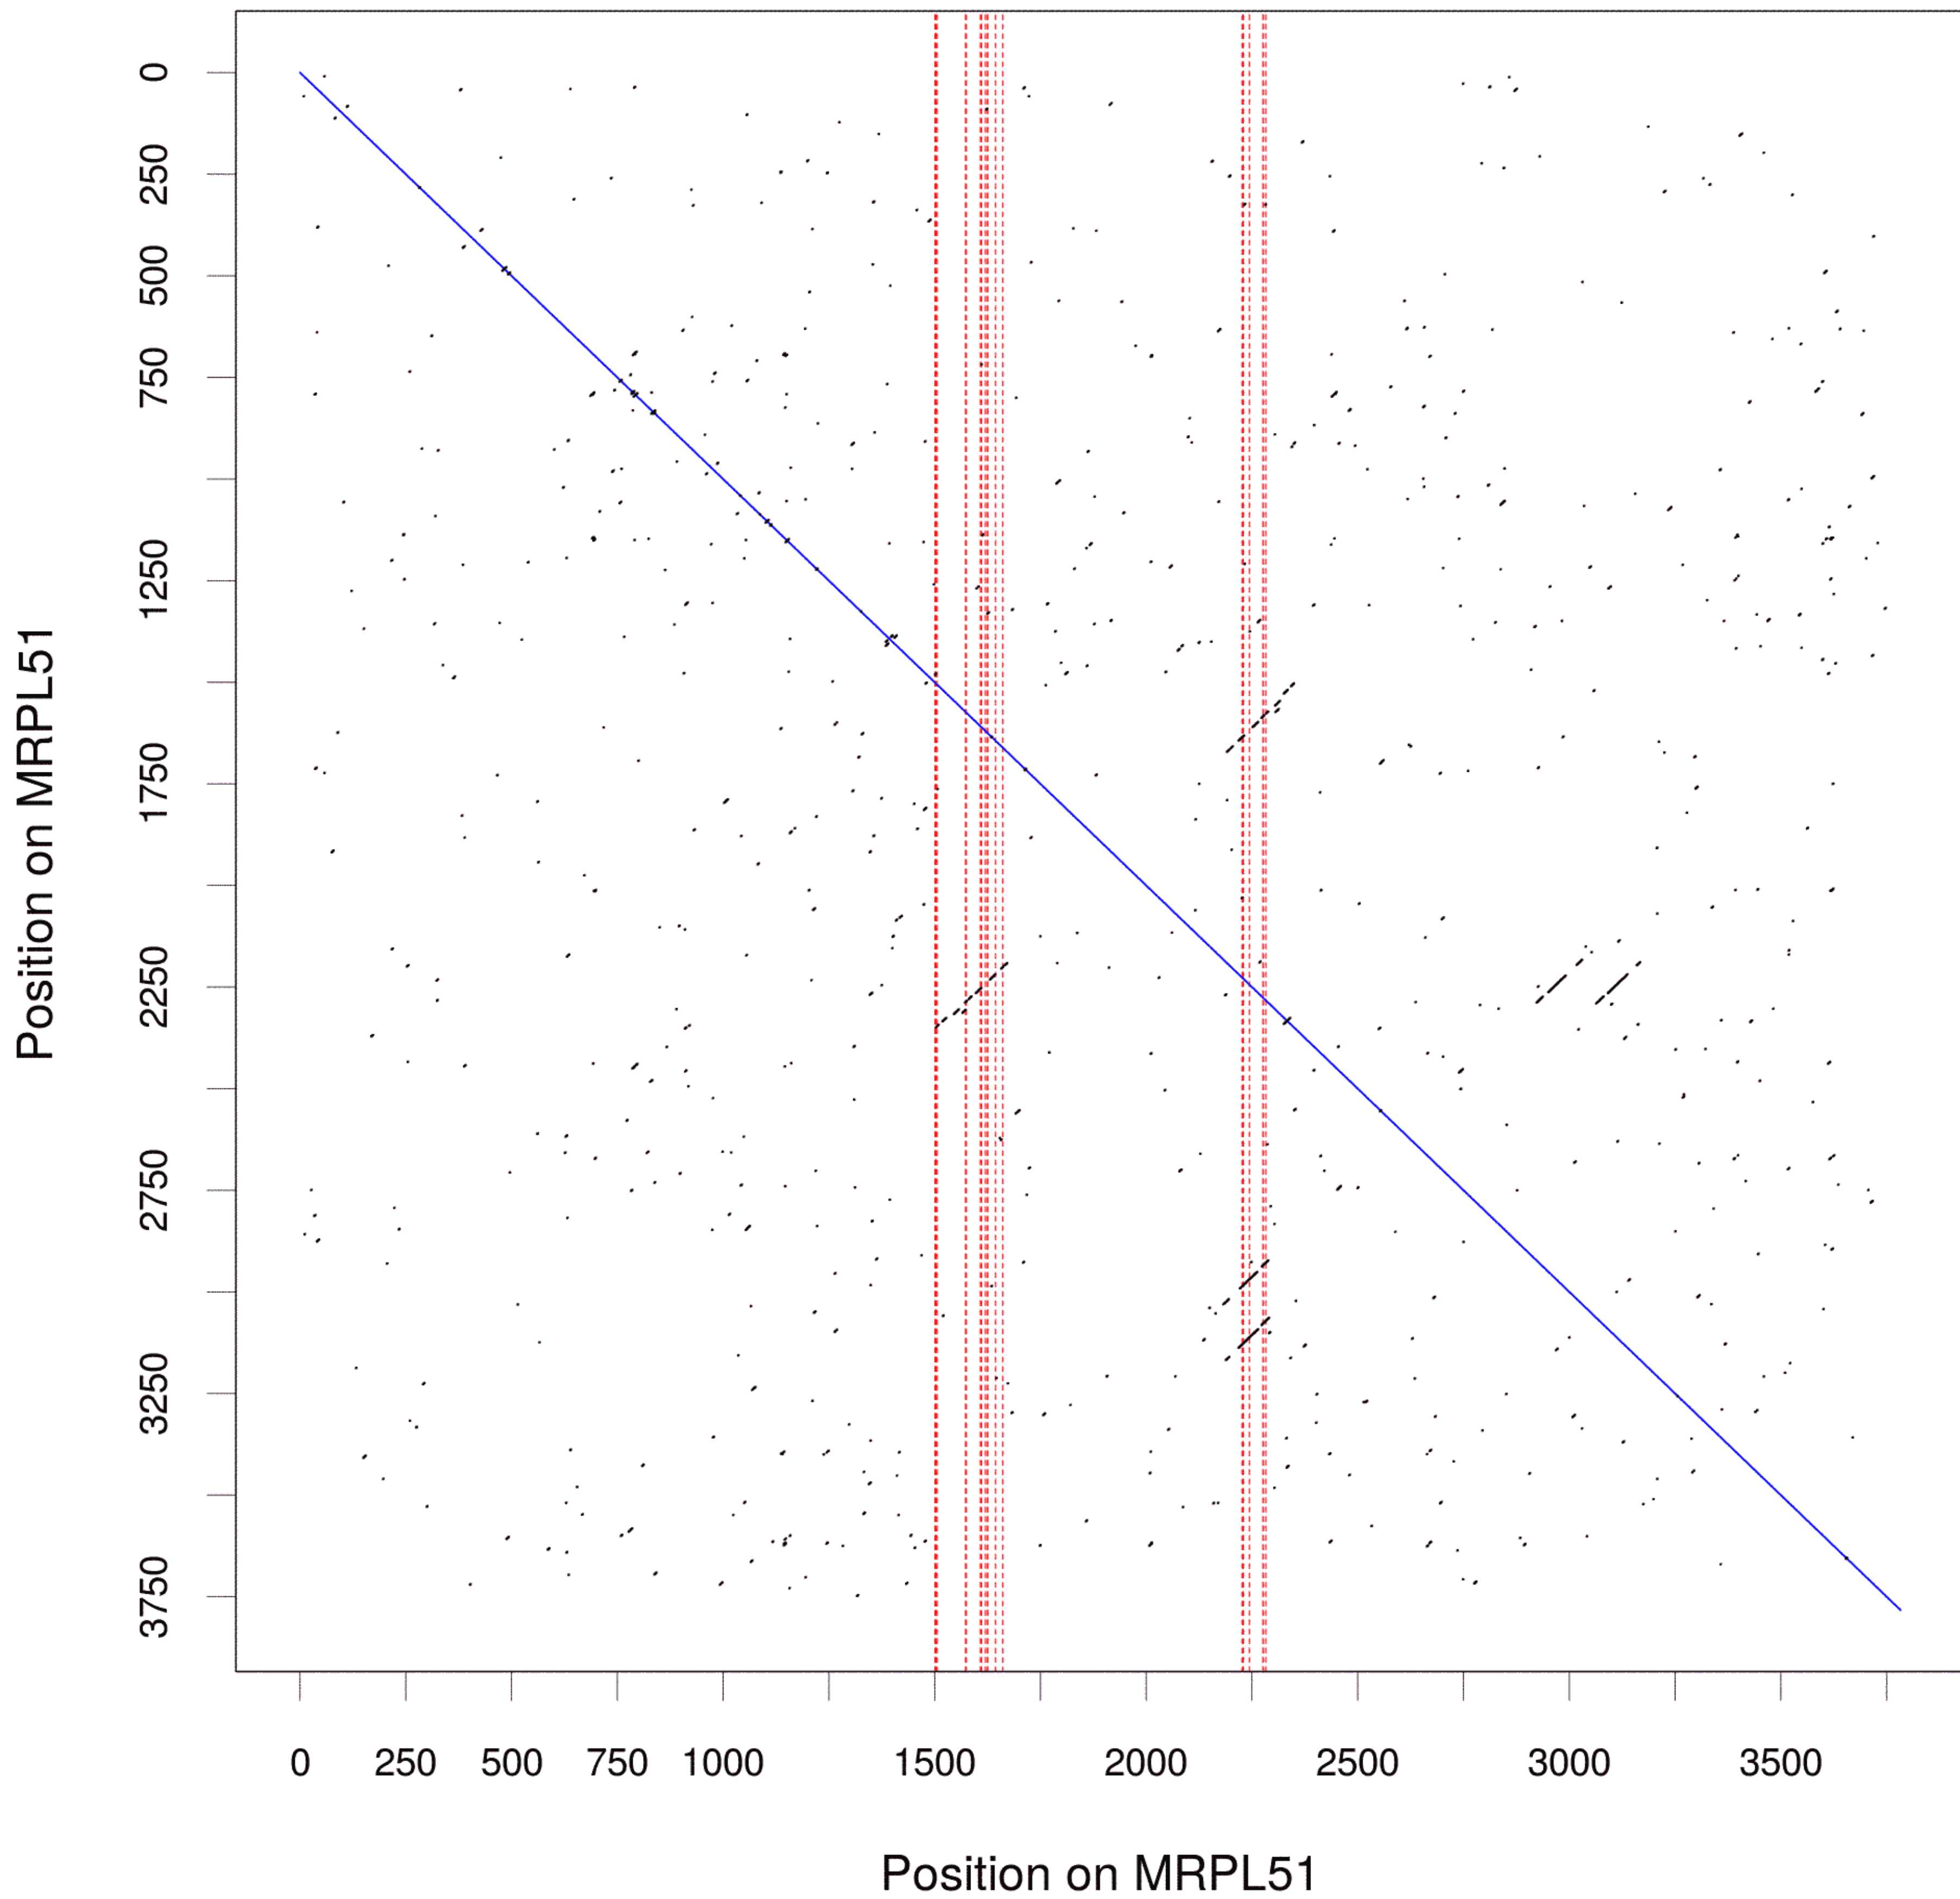

# MRPL53

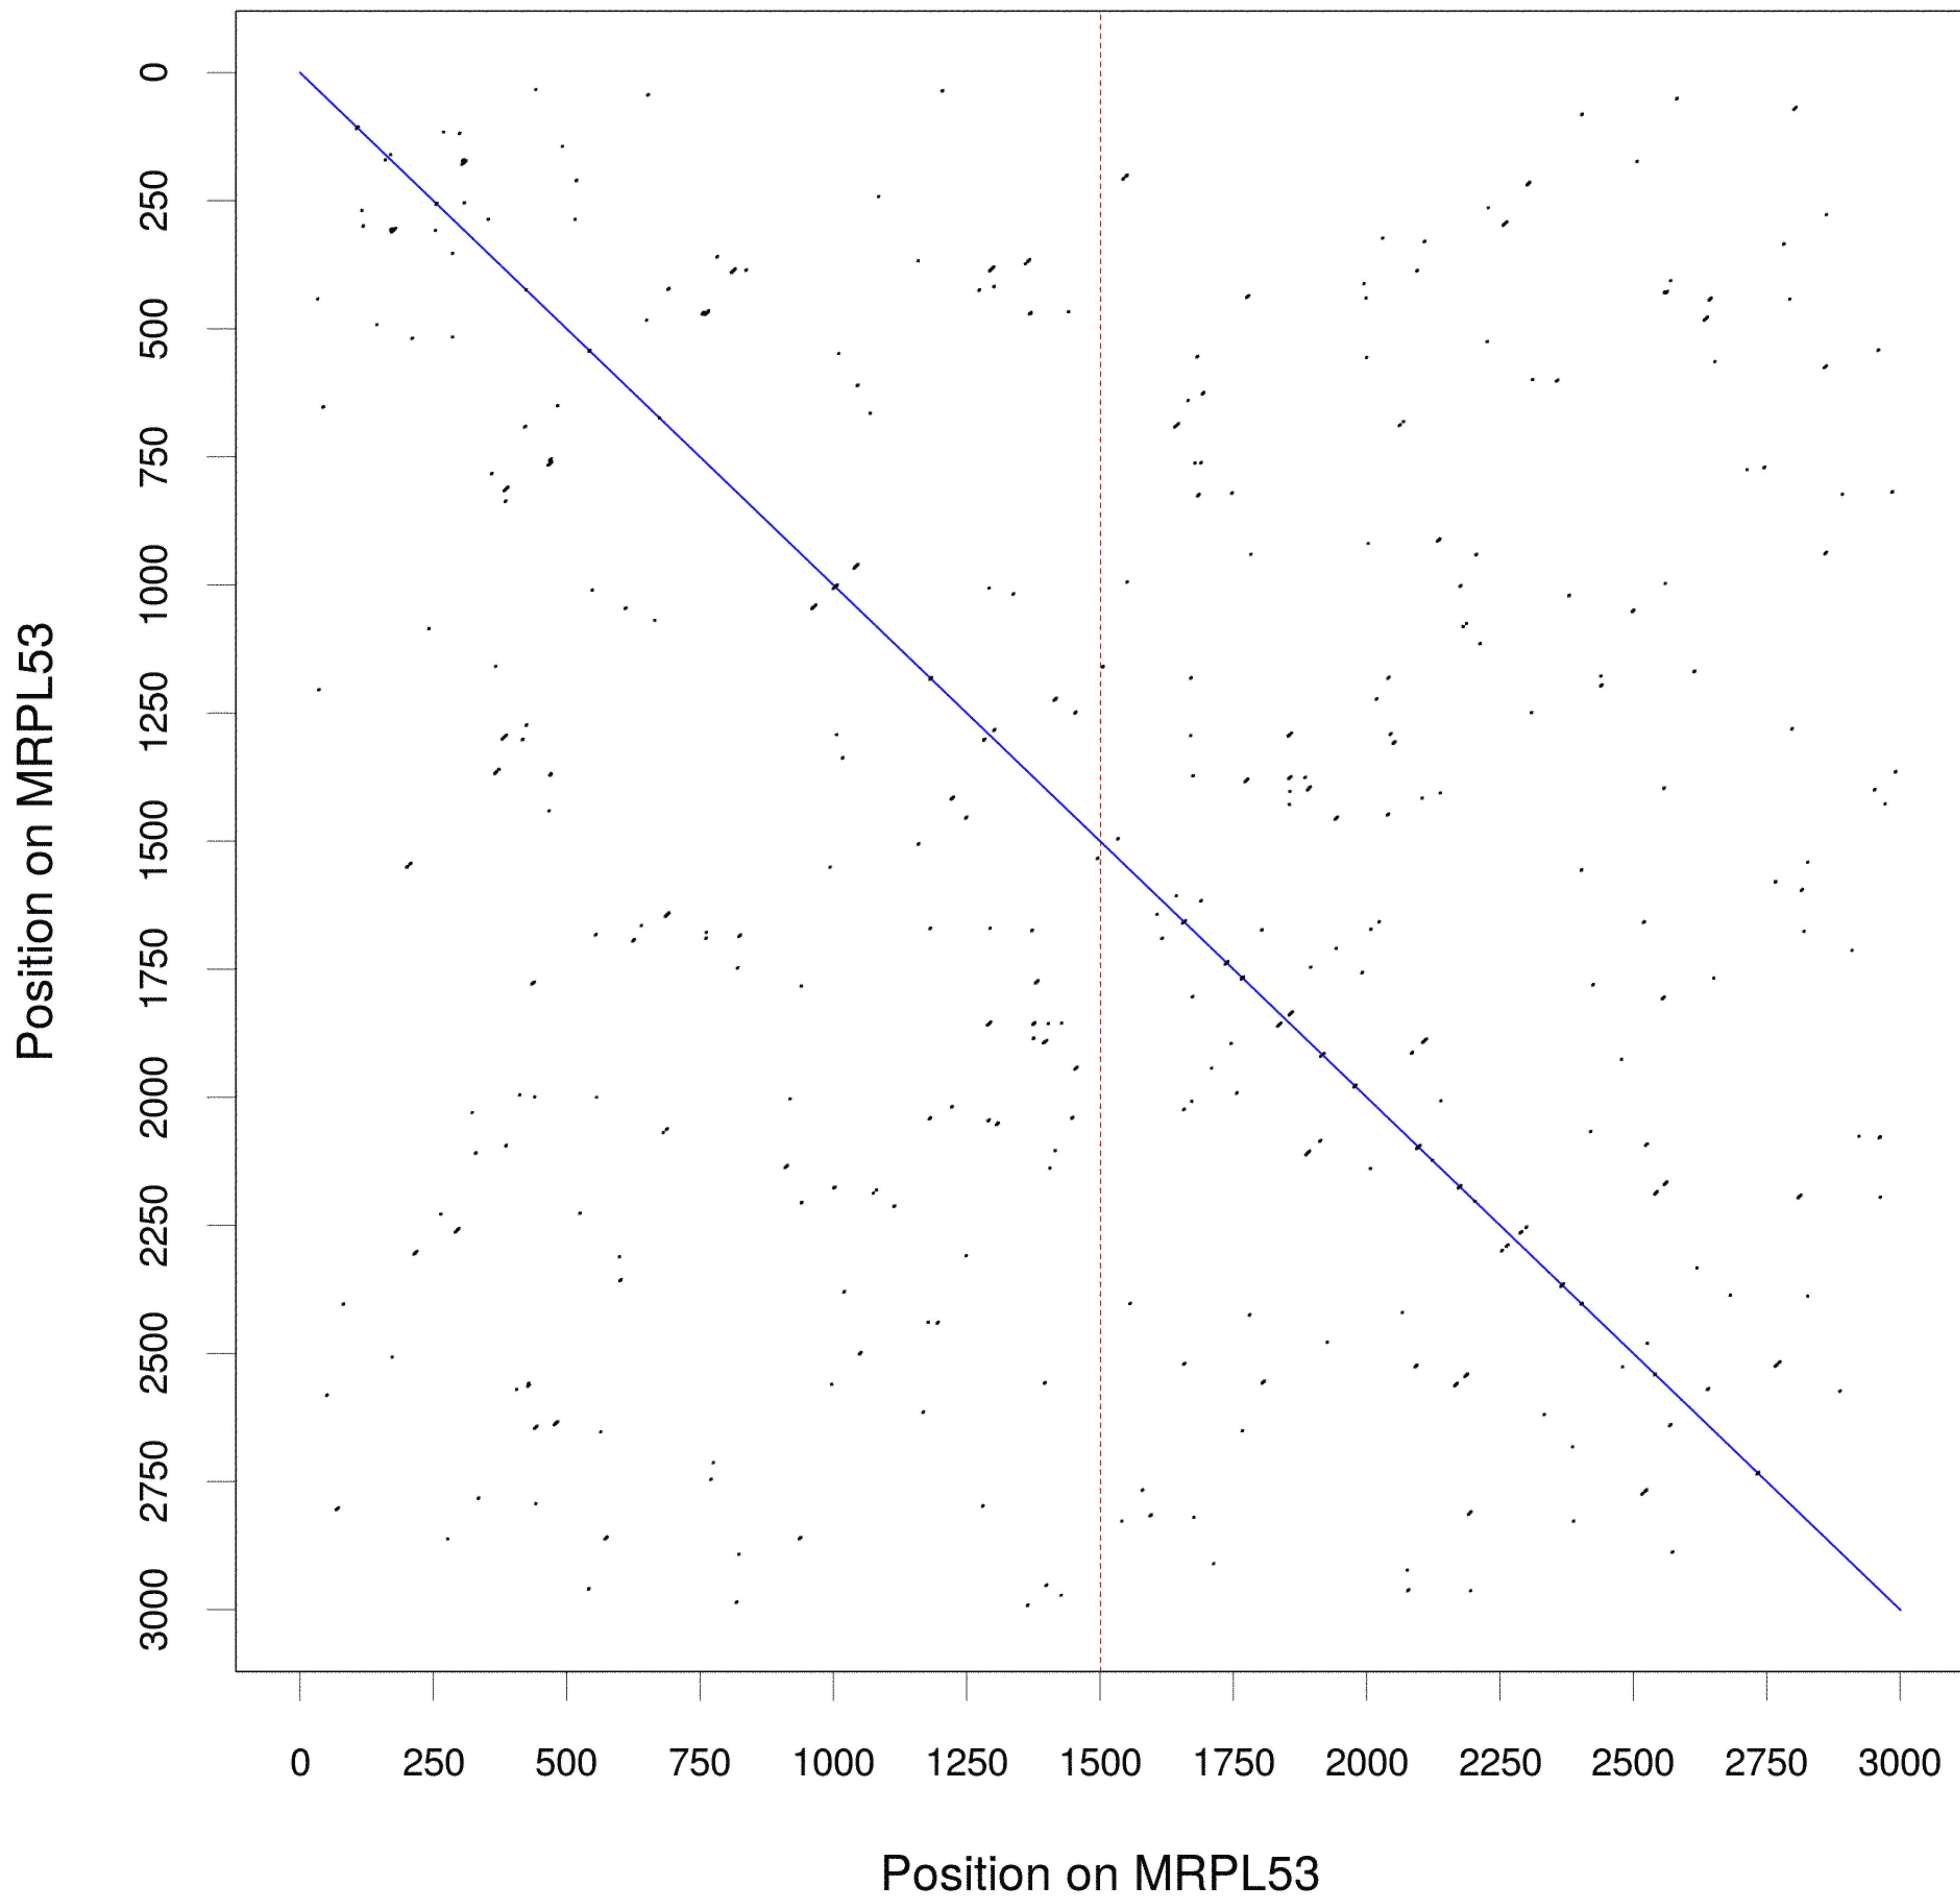



# MRPS18A

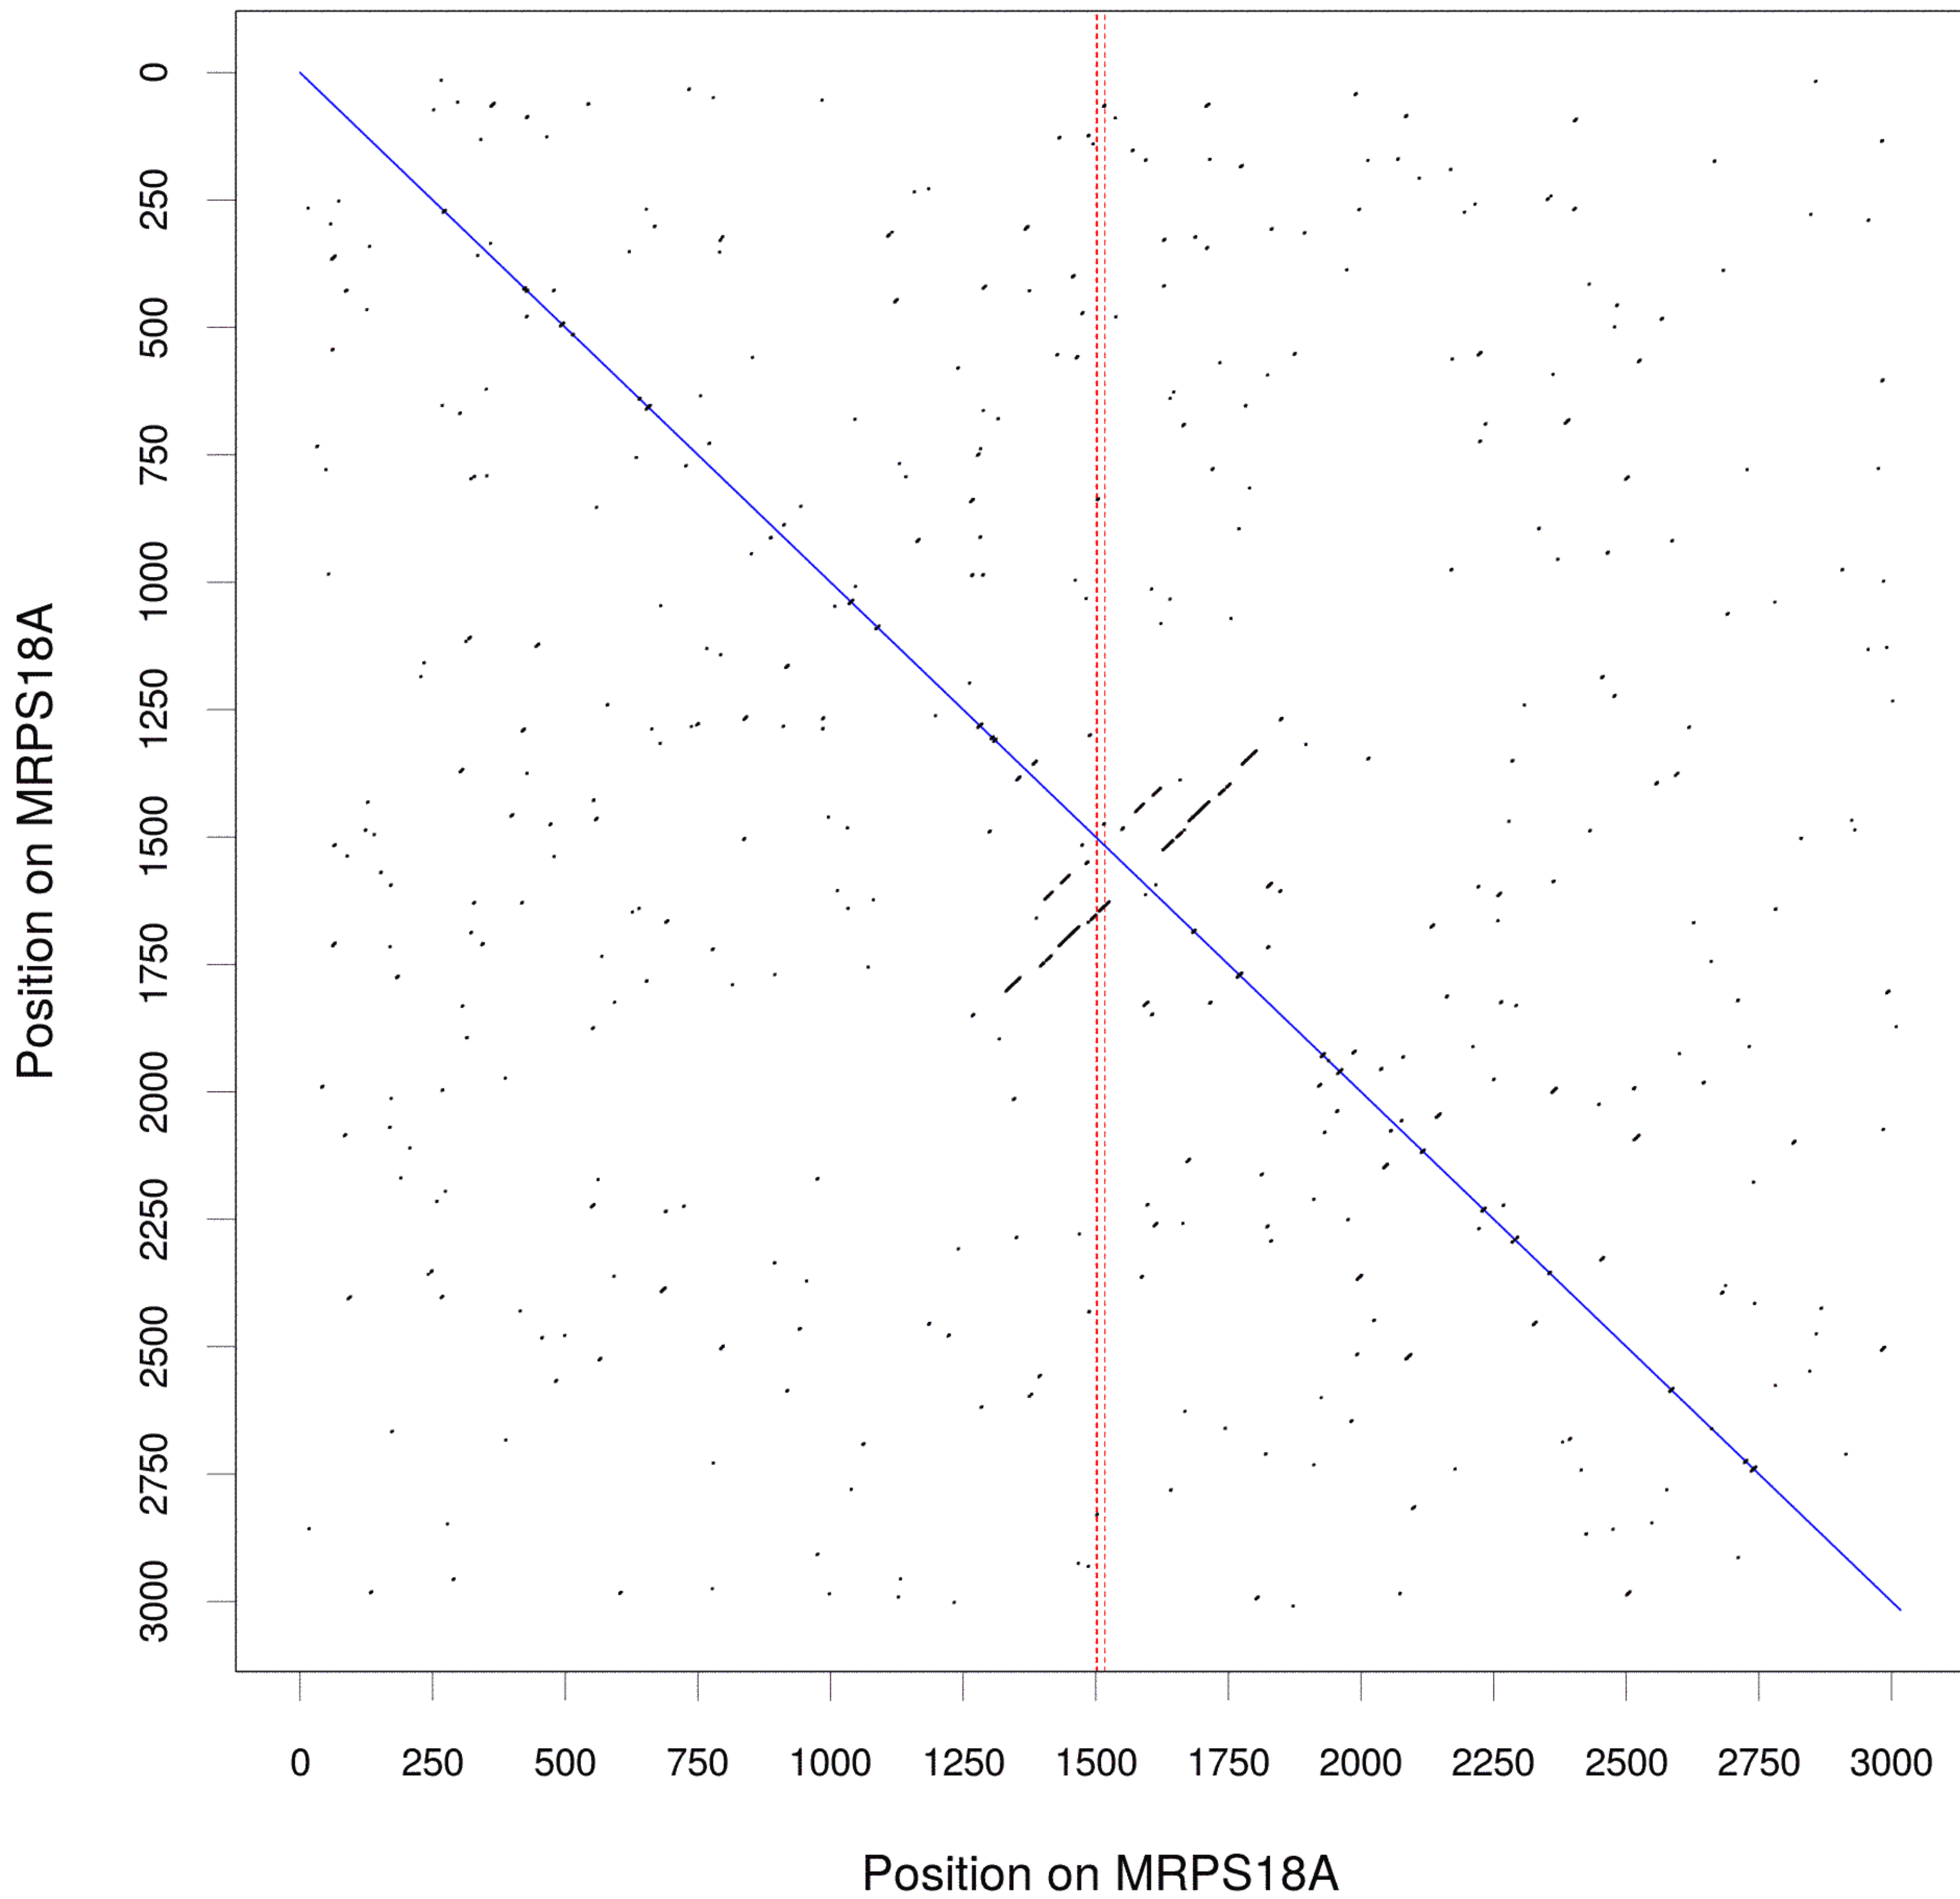

# MTG1

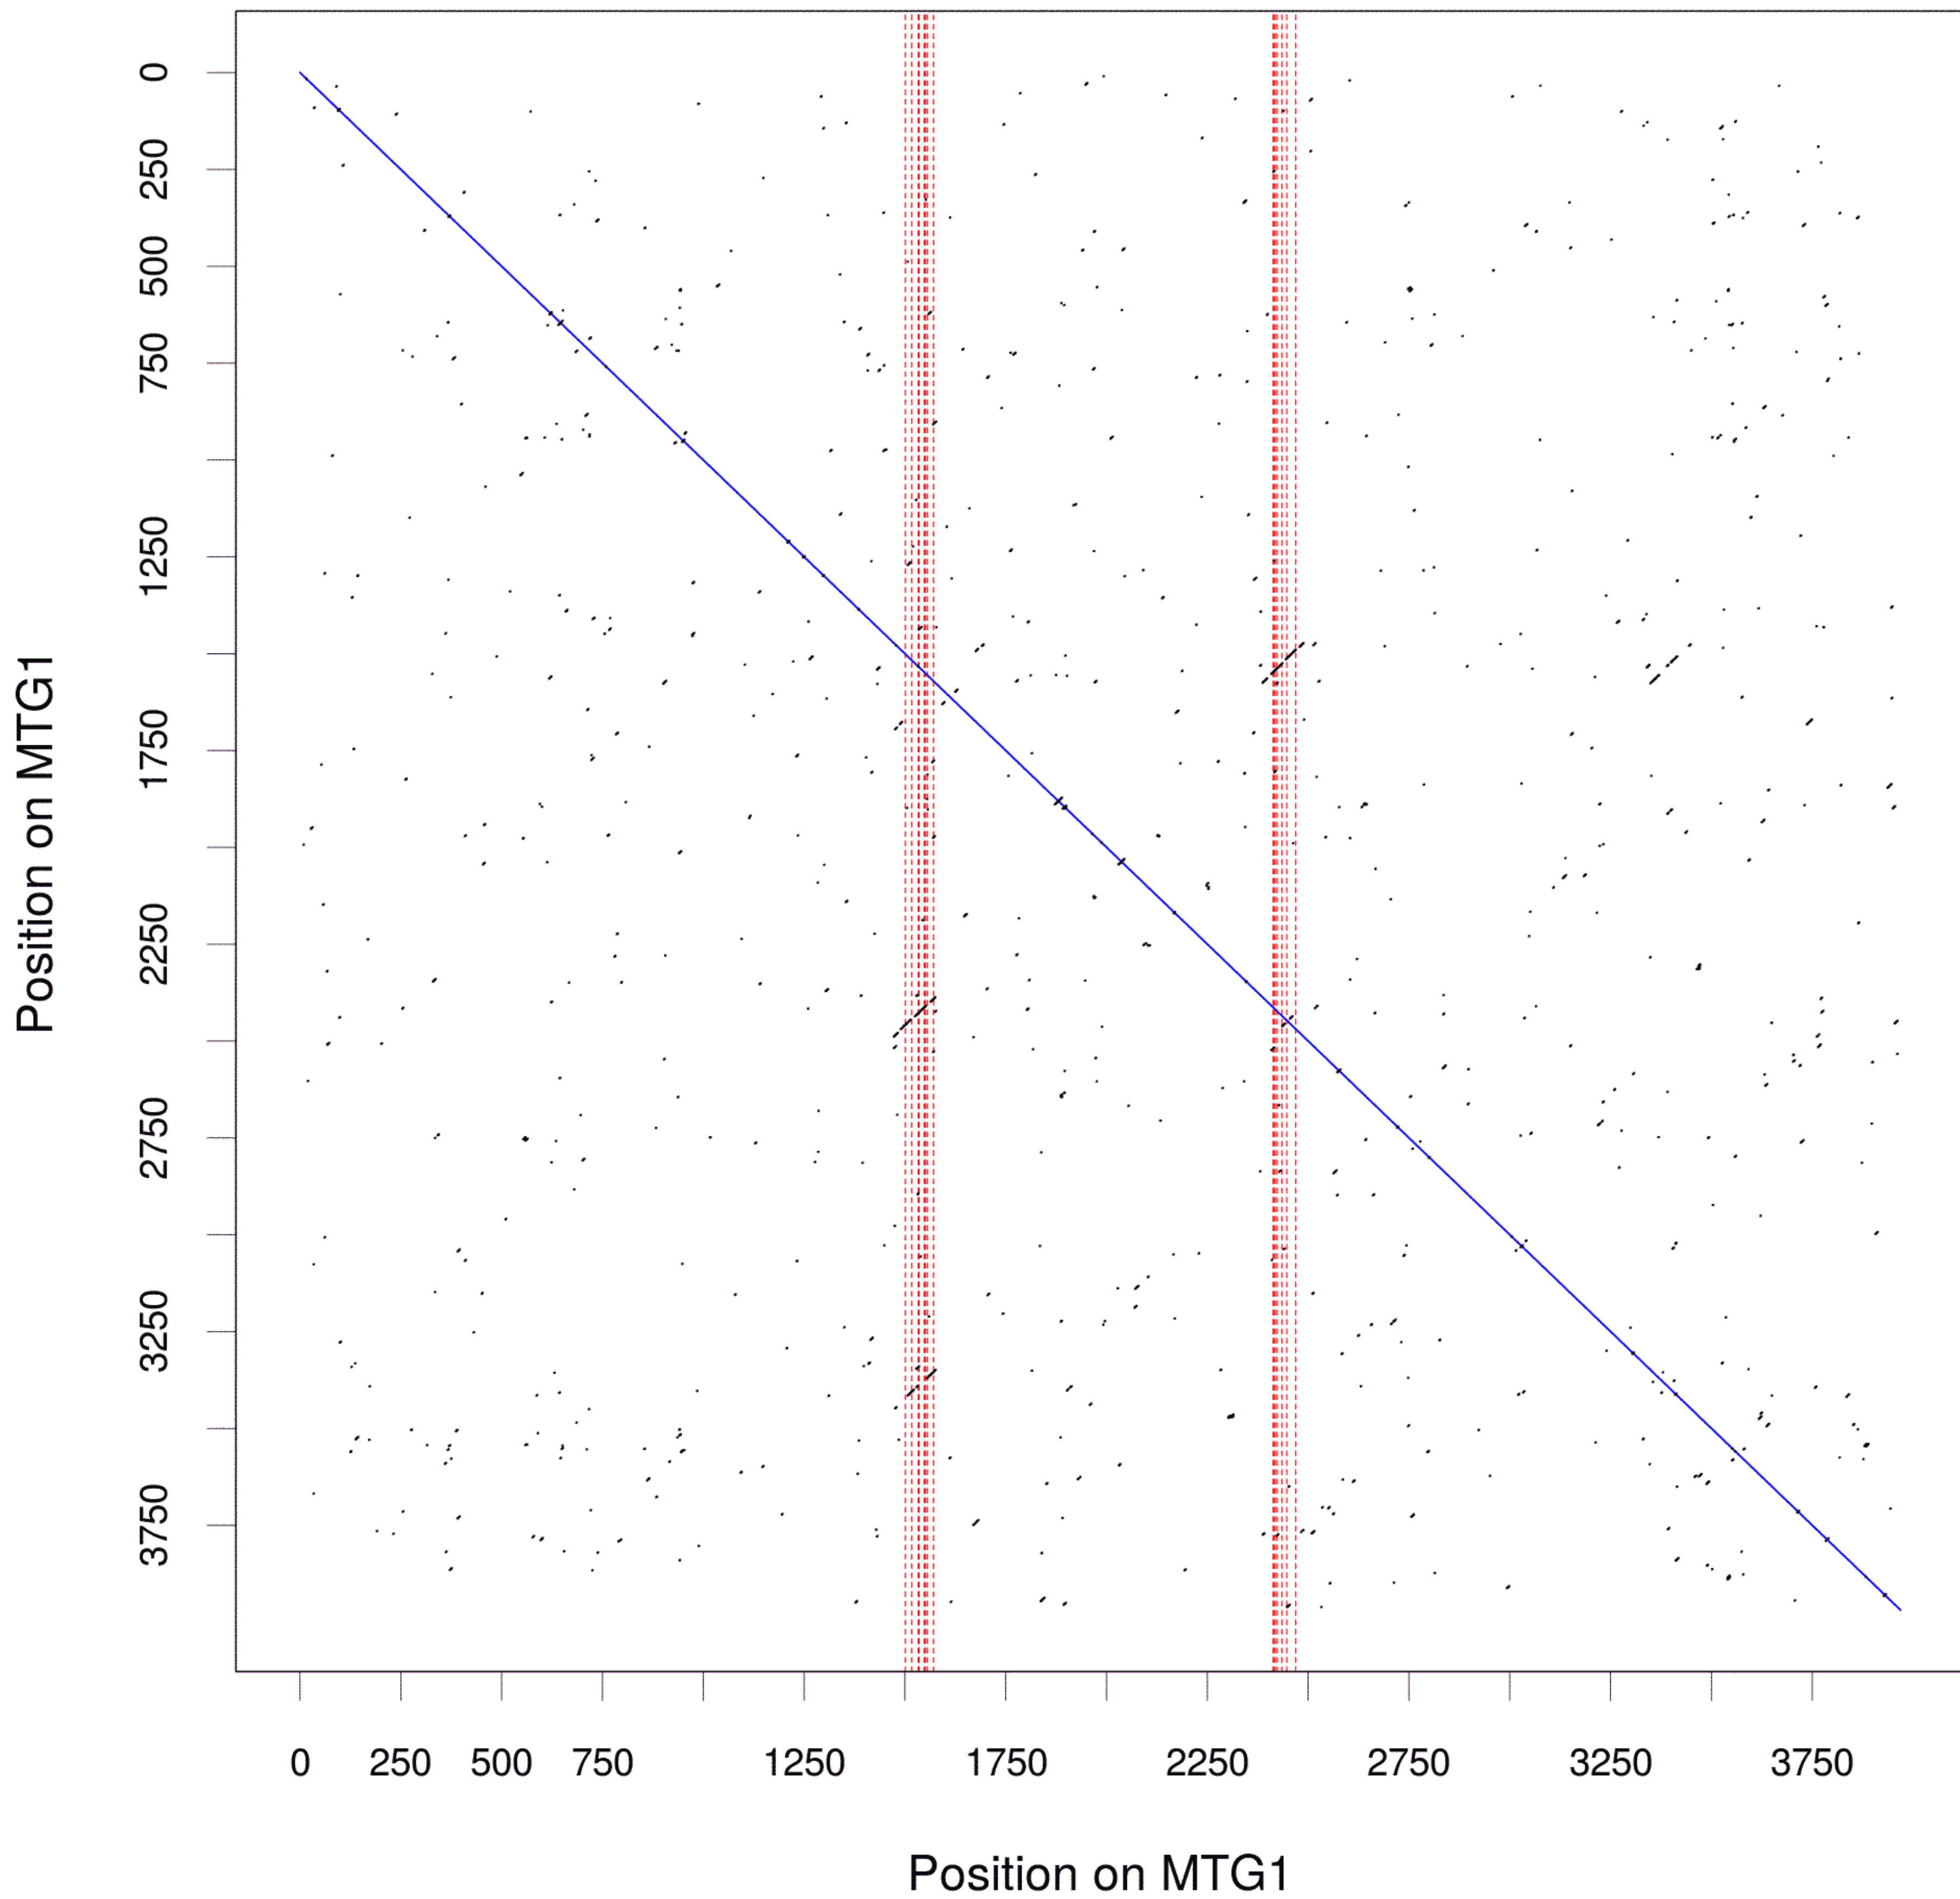

# MTSS1

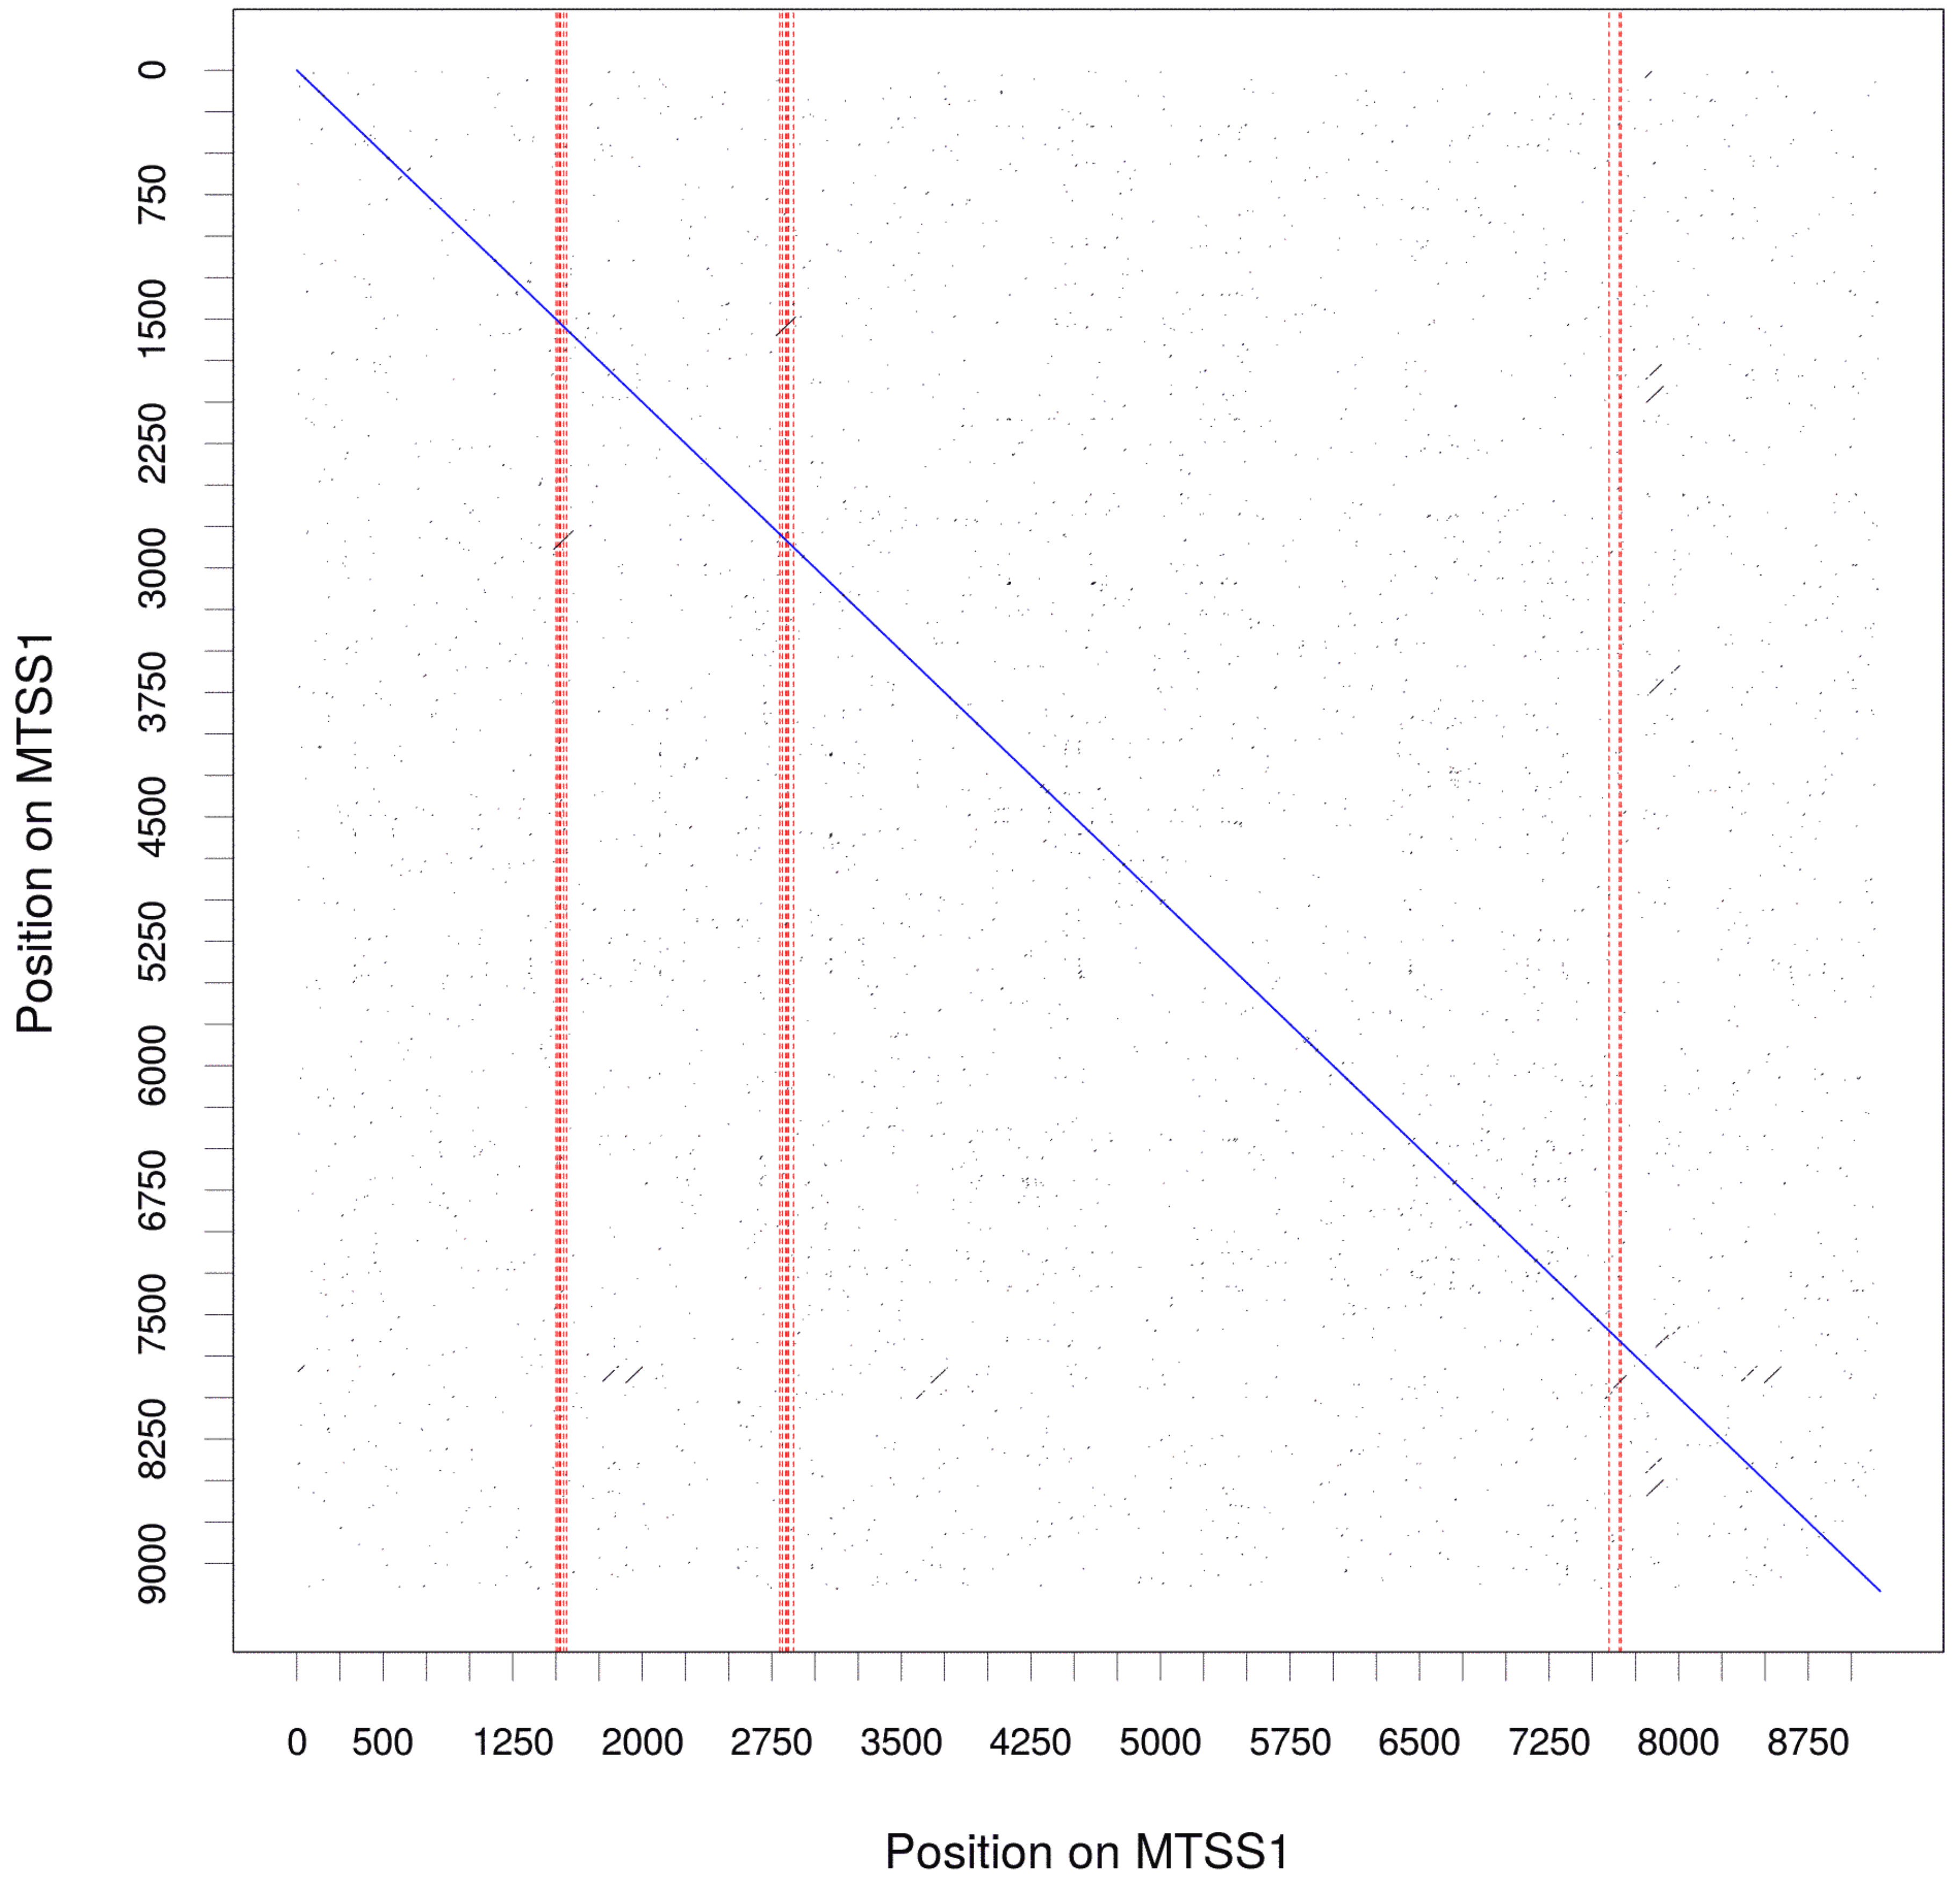

# NDUFA6

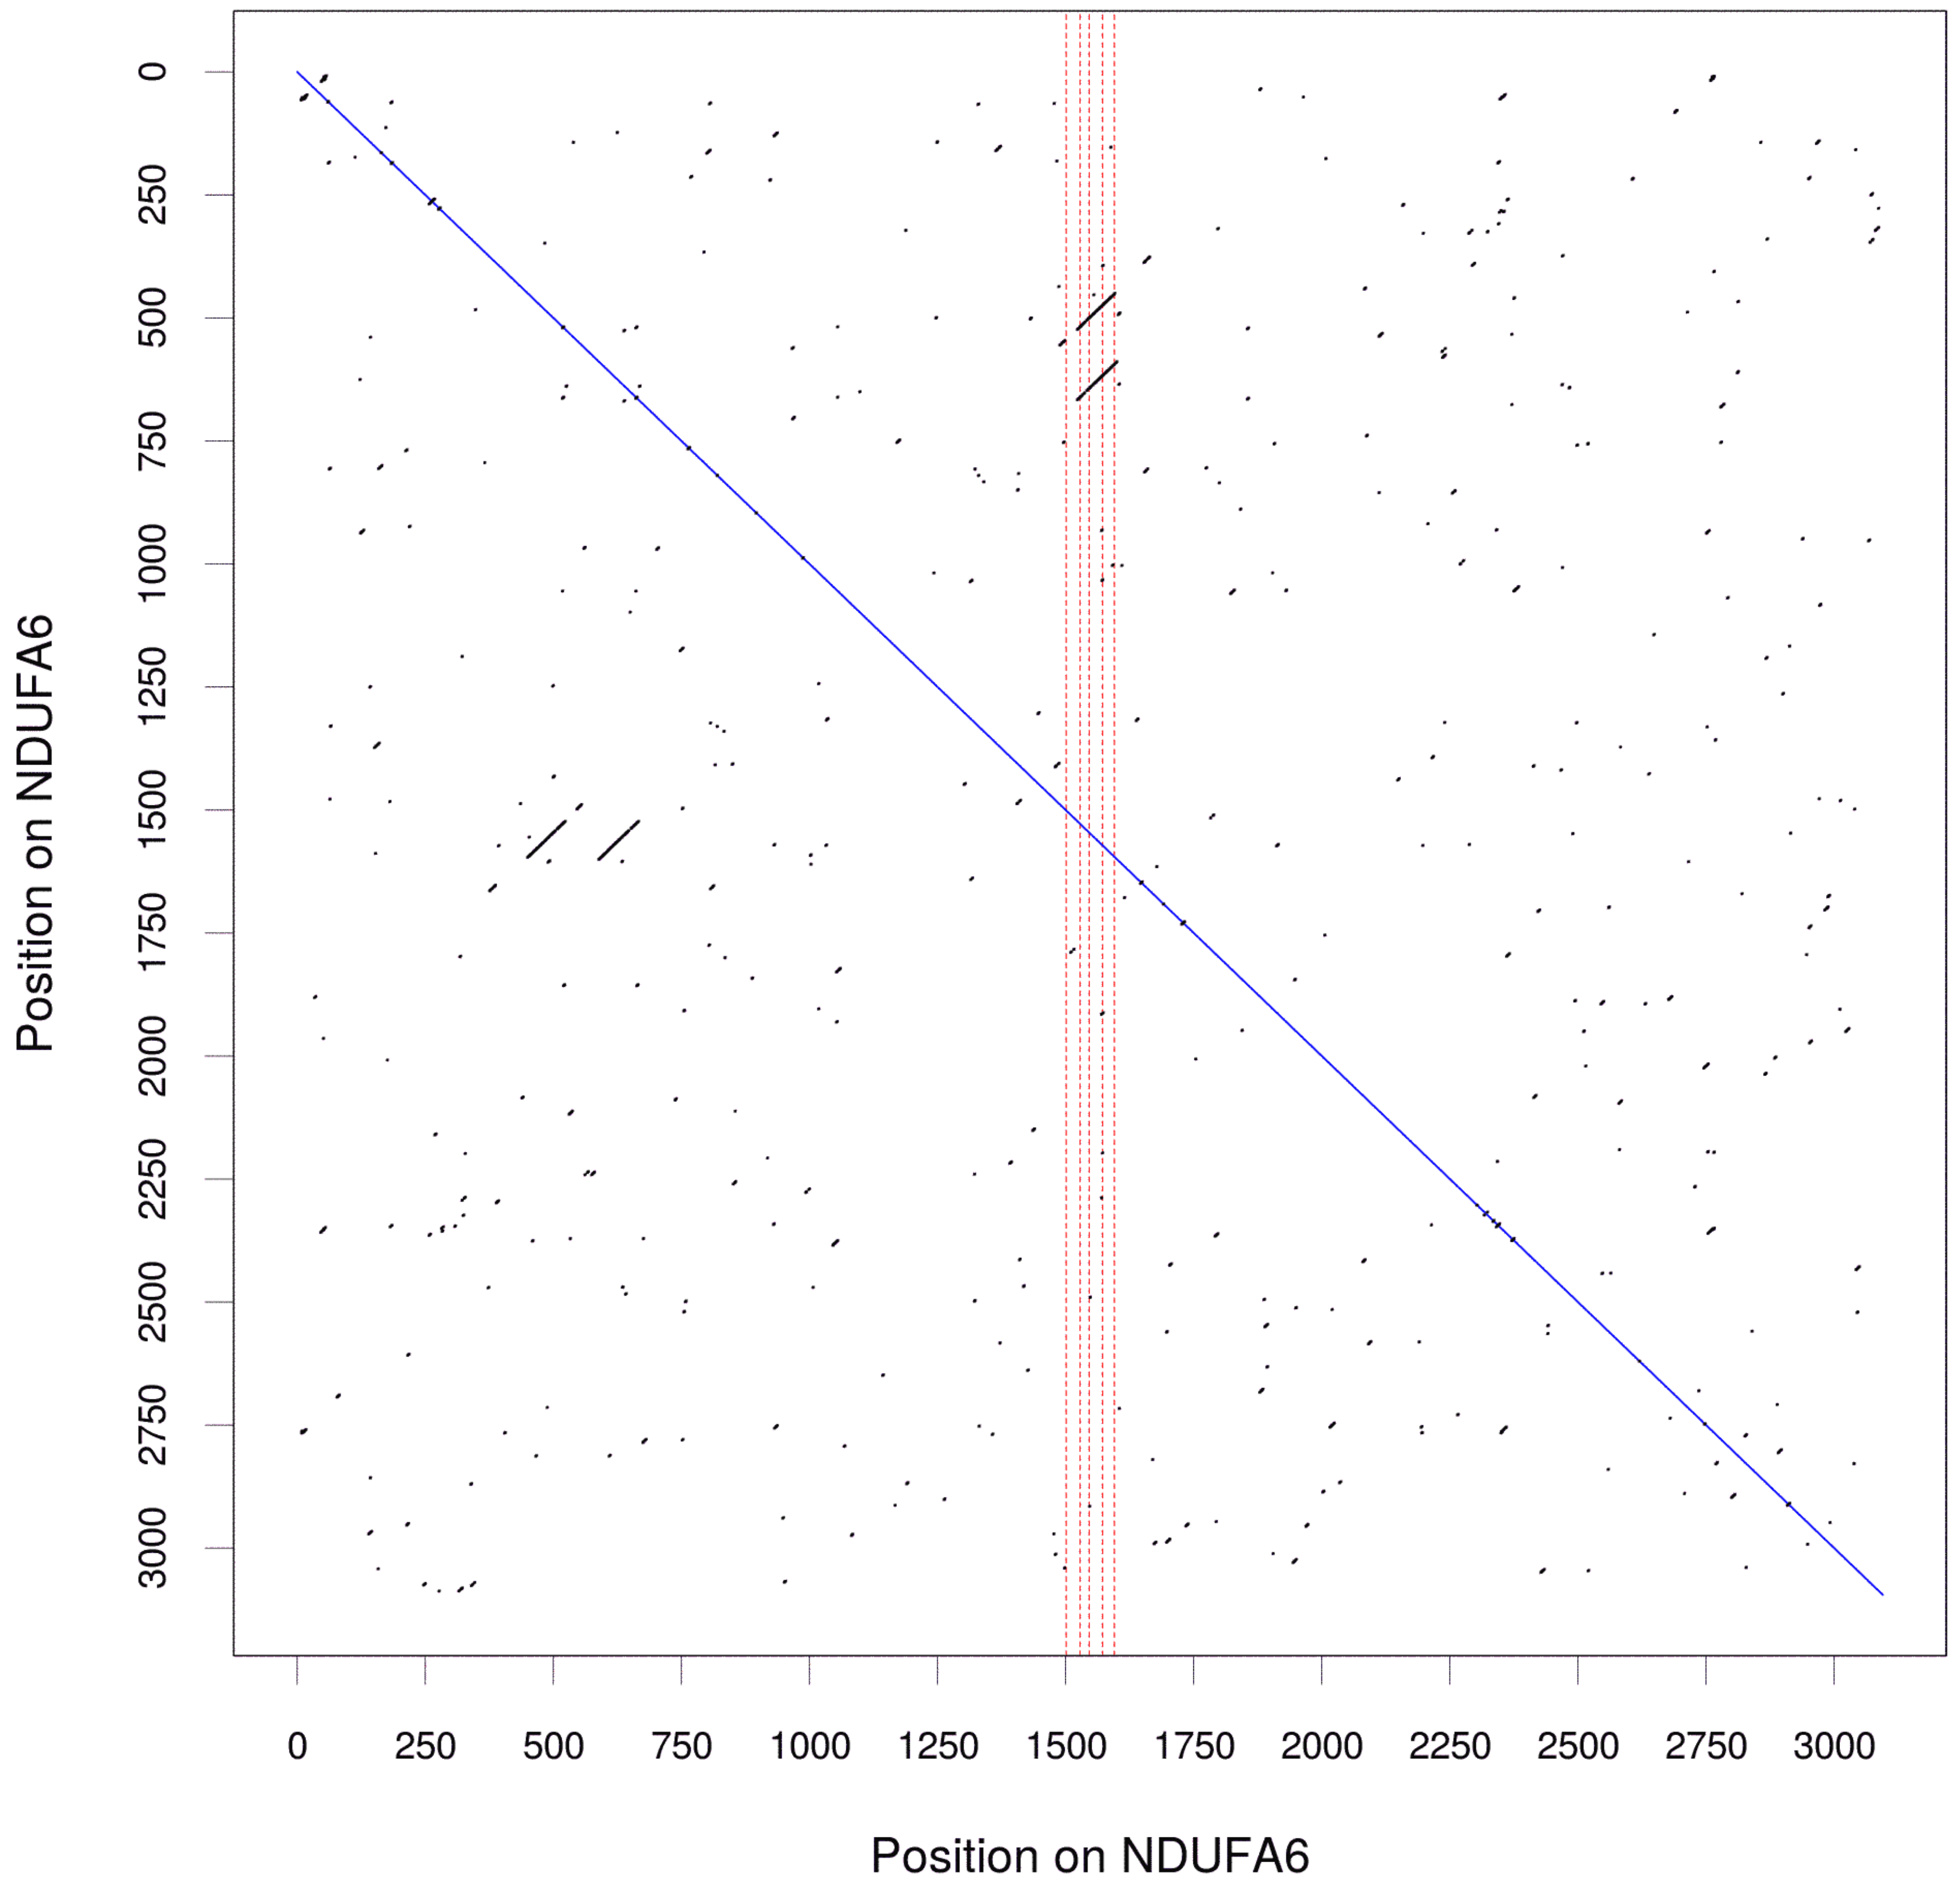

# NEIL1

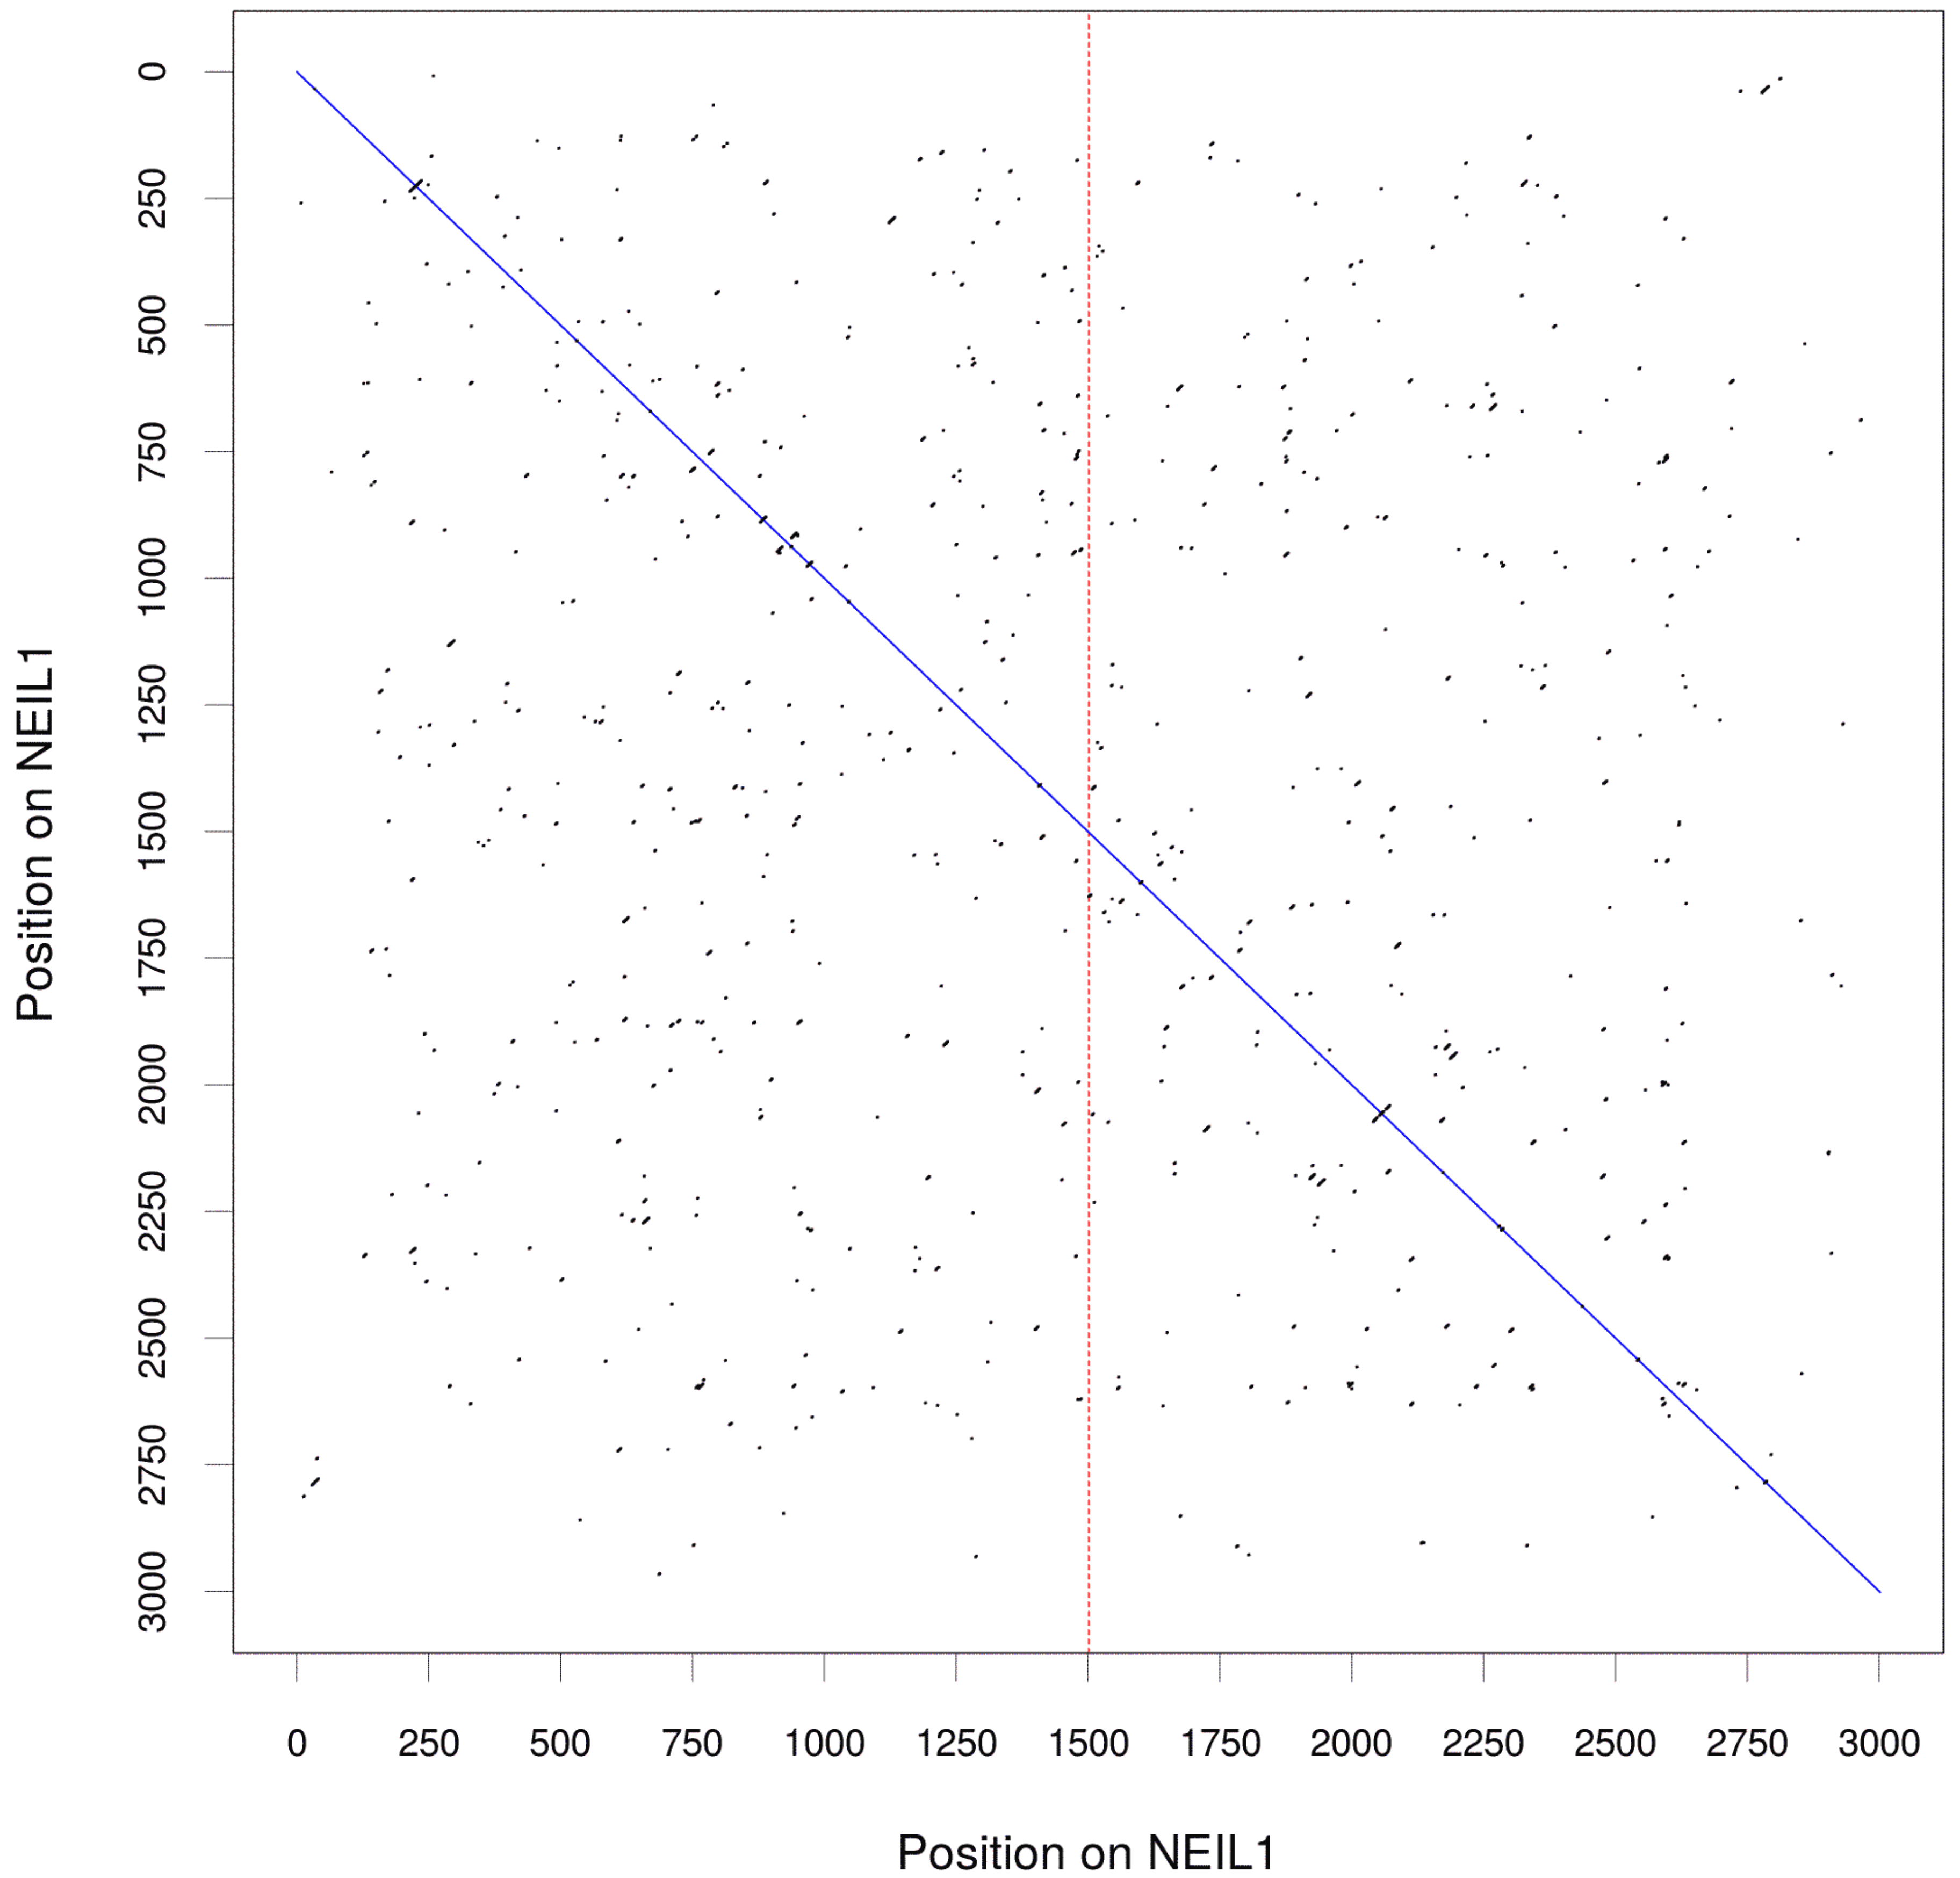

# NFIC

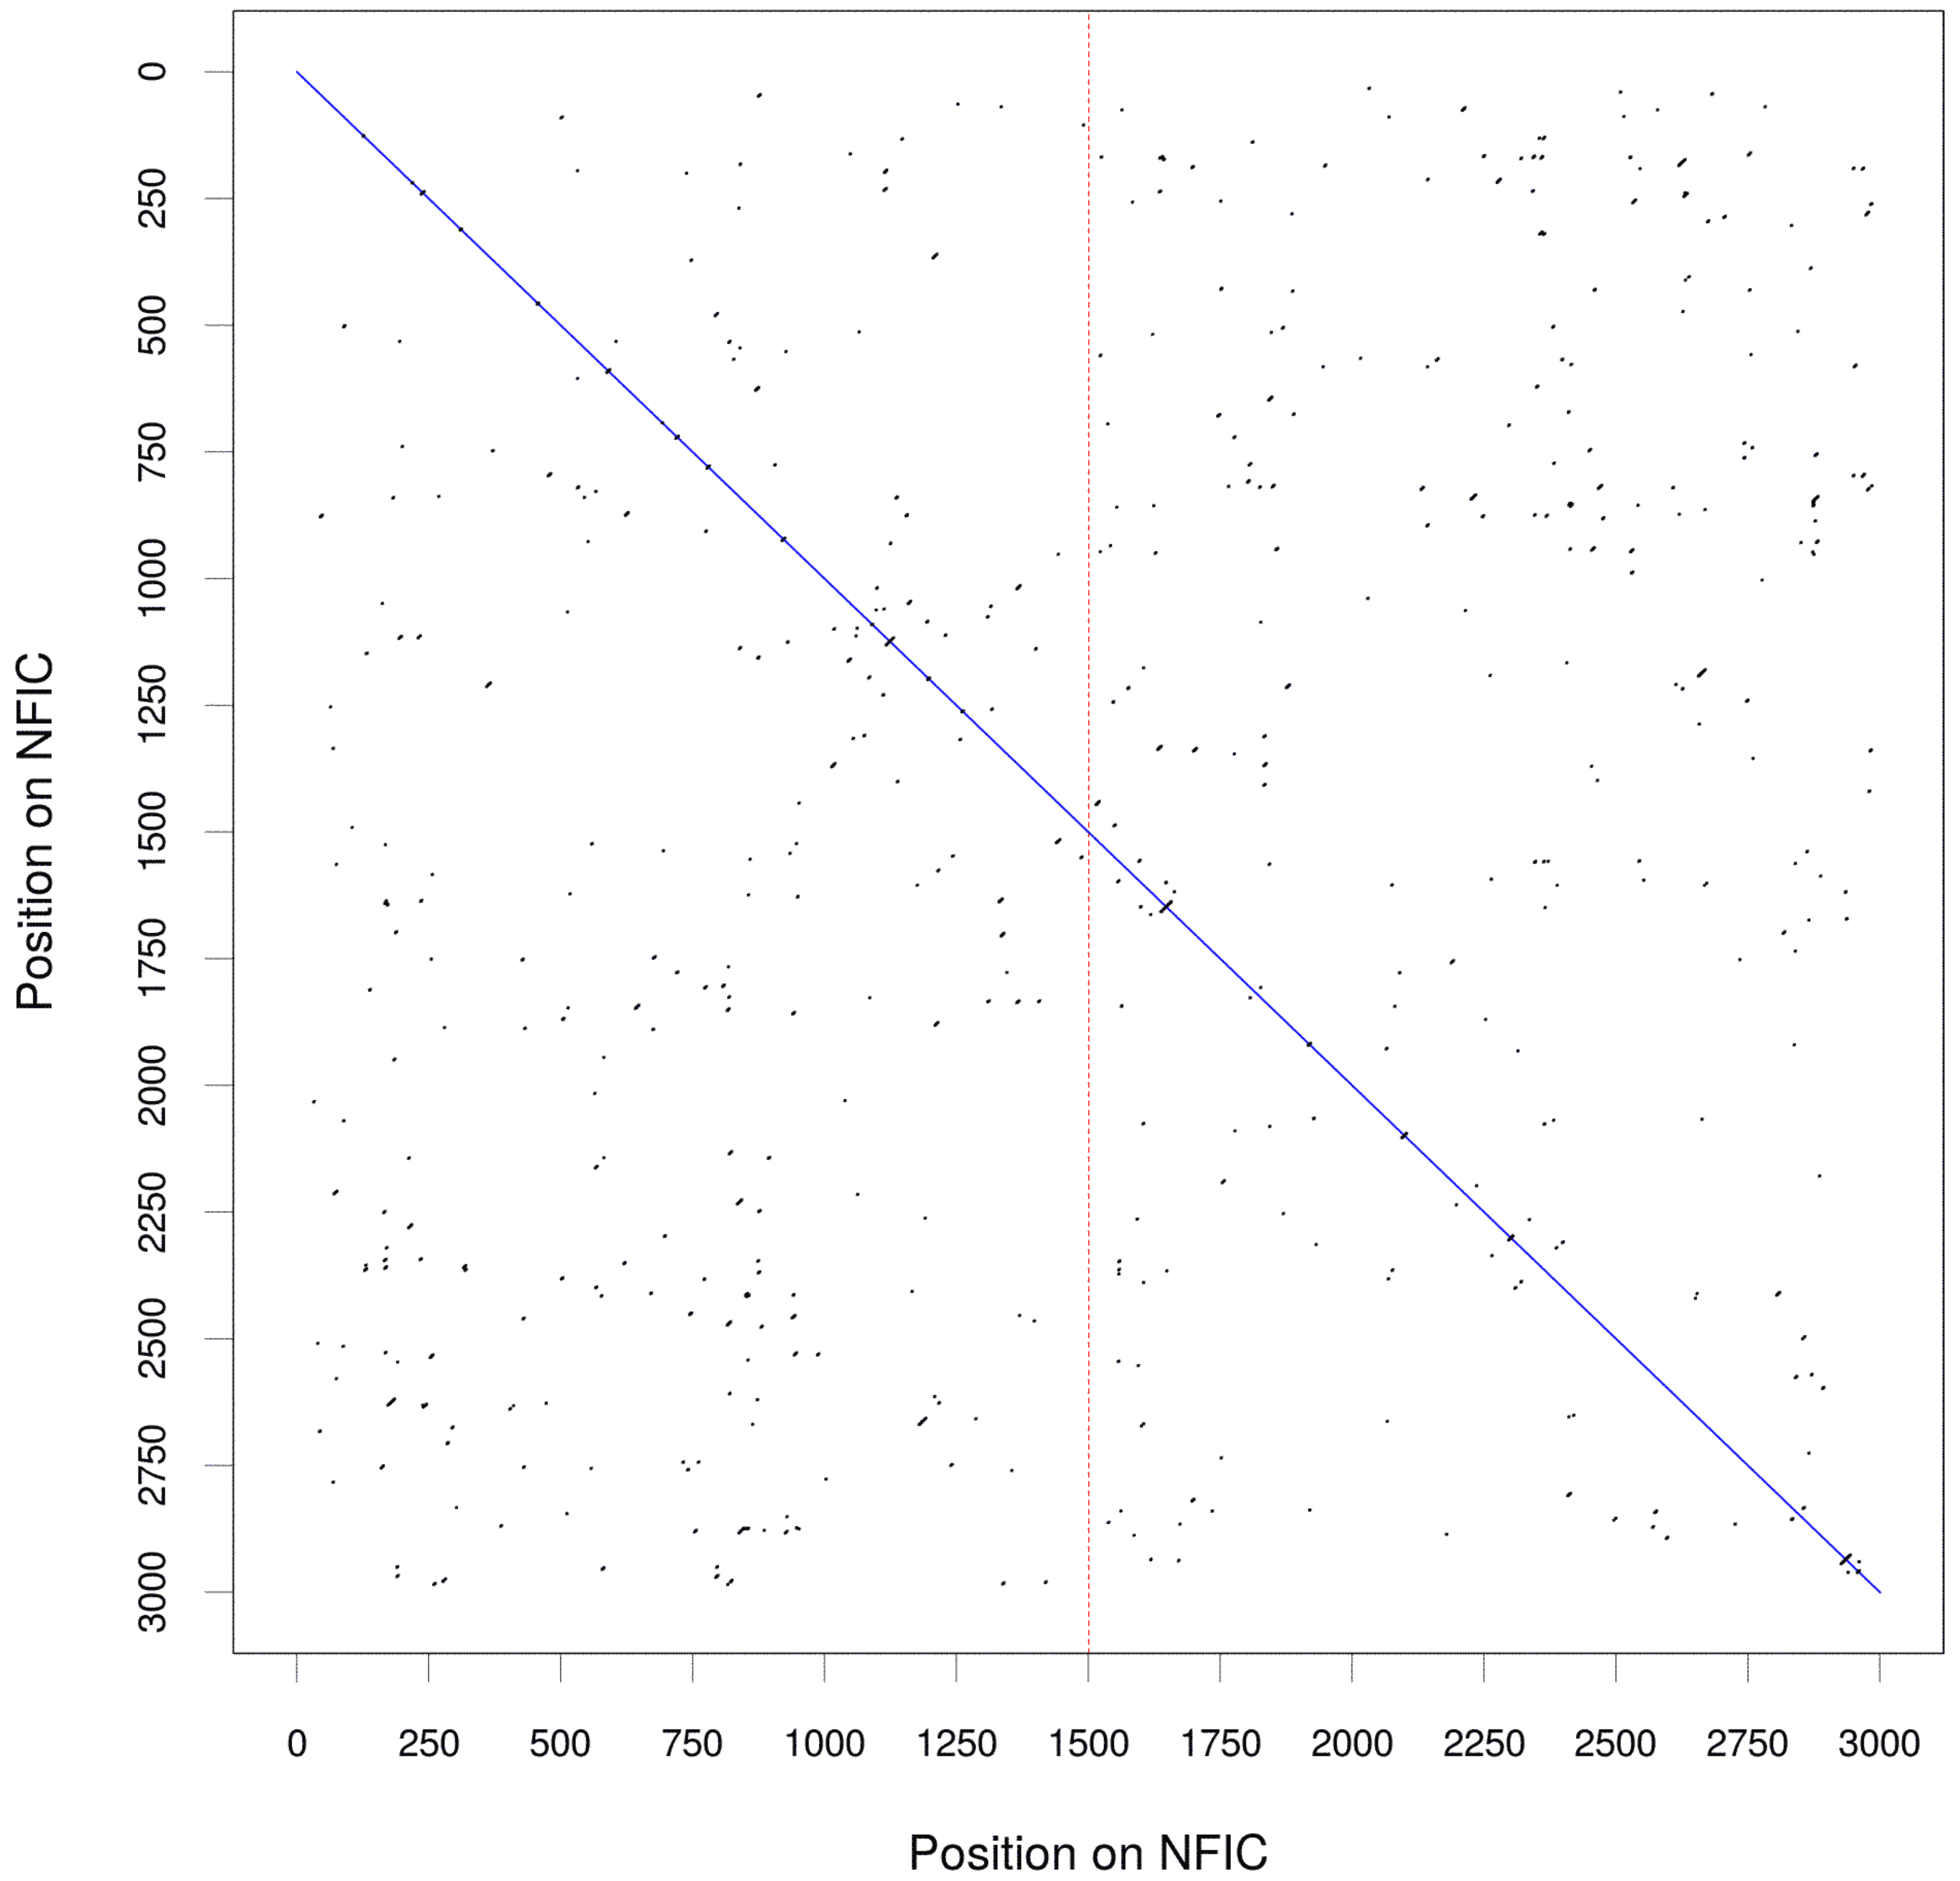

# NHLRC3

Position on NHLRC3

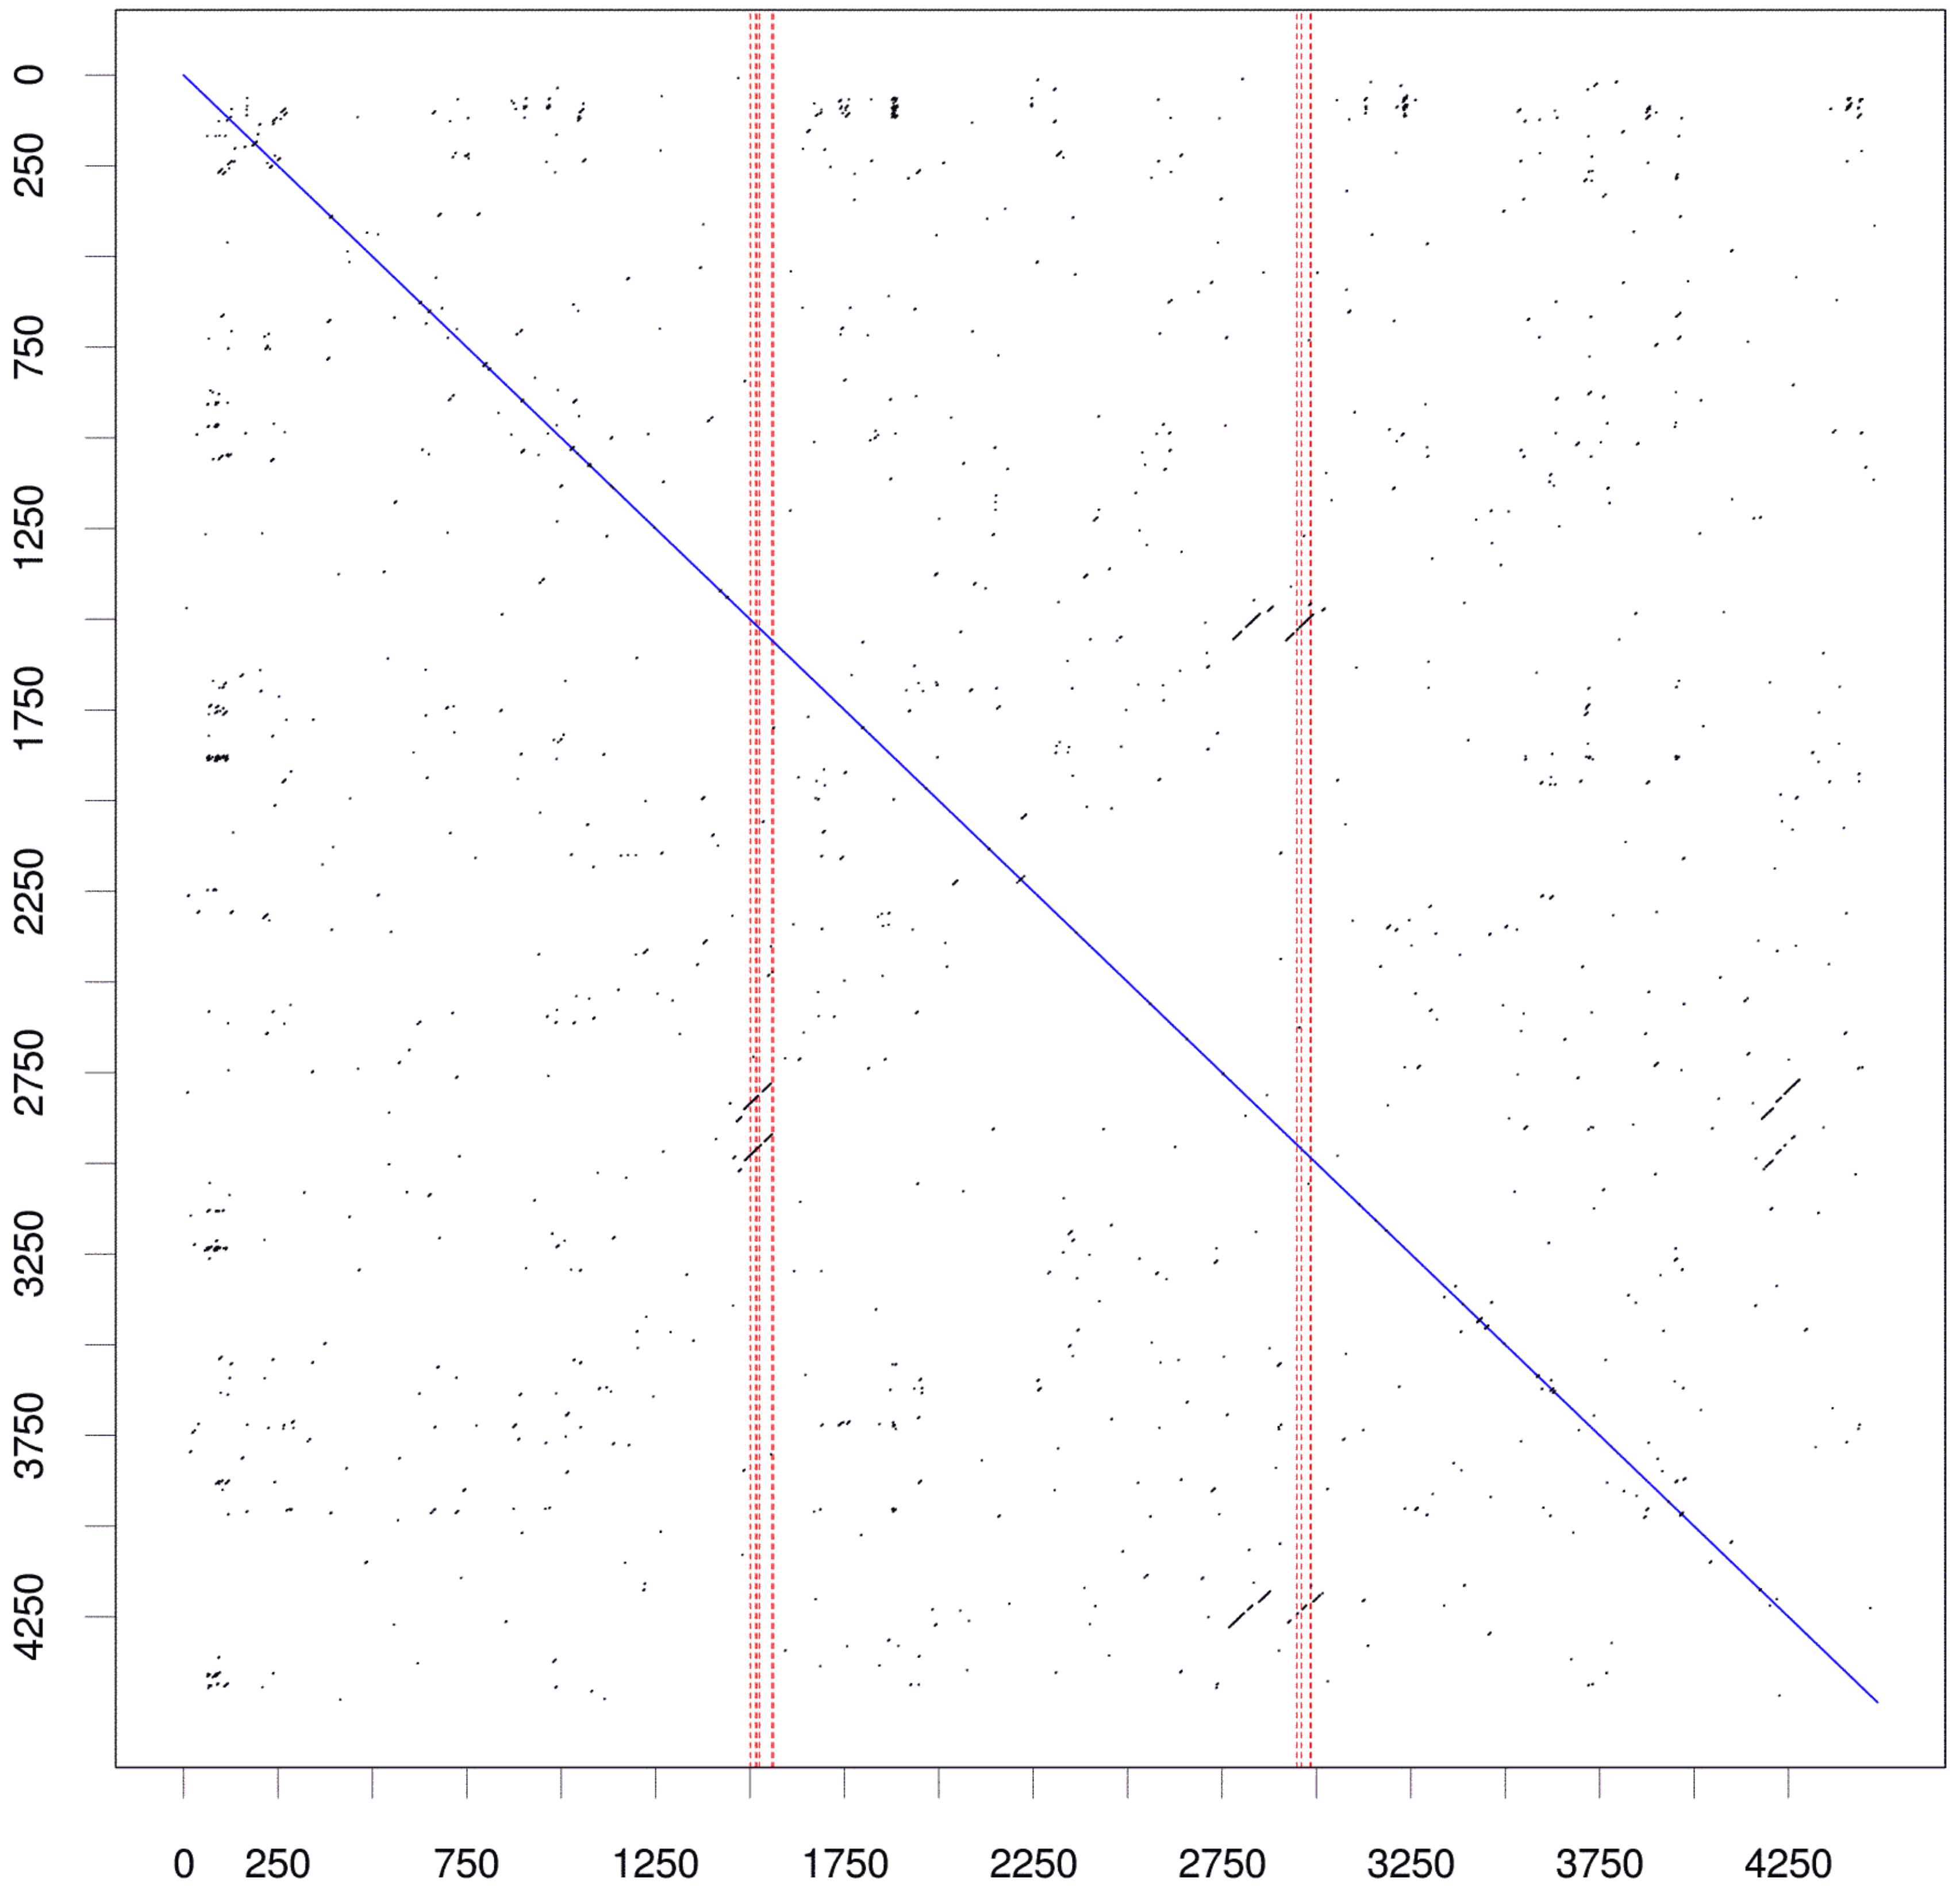

Position on NHLRC3

# NMI

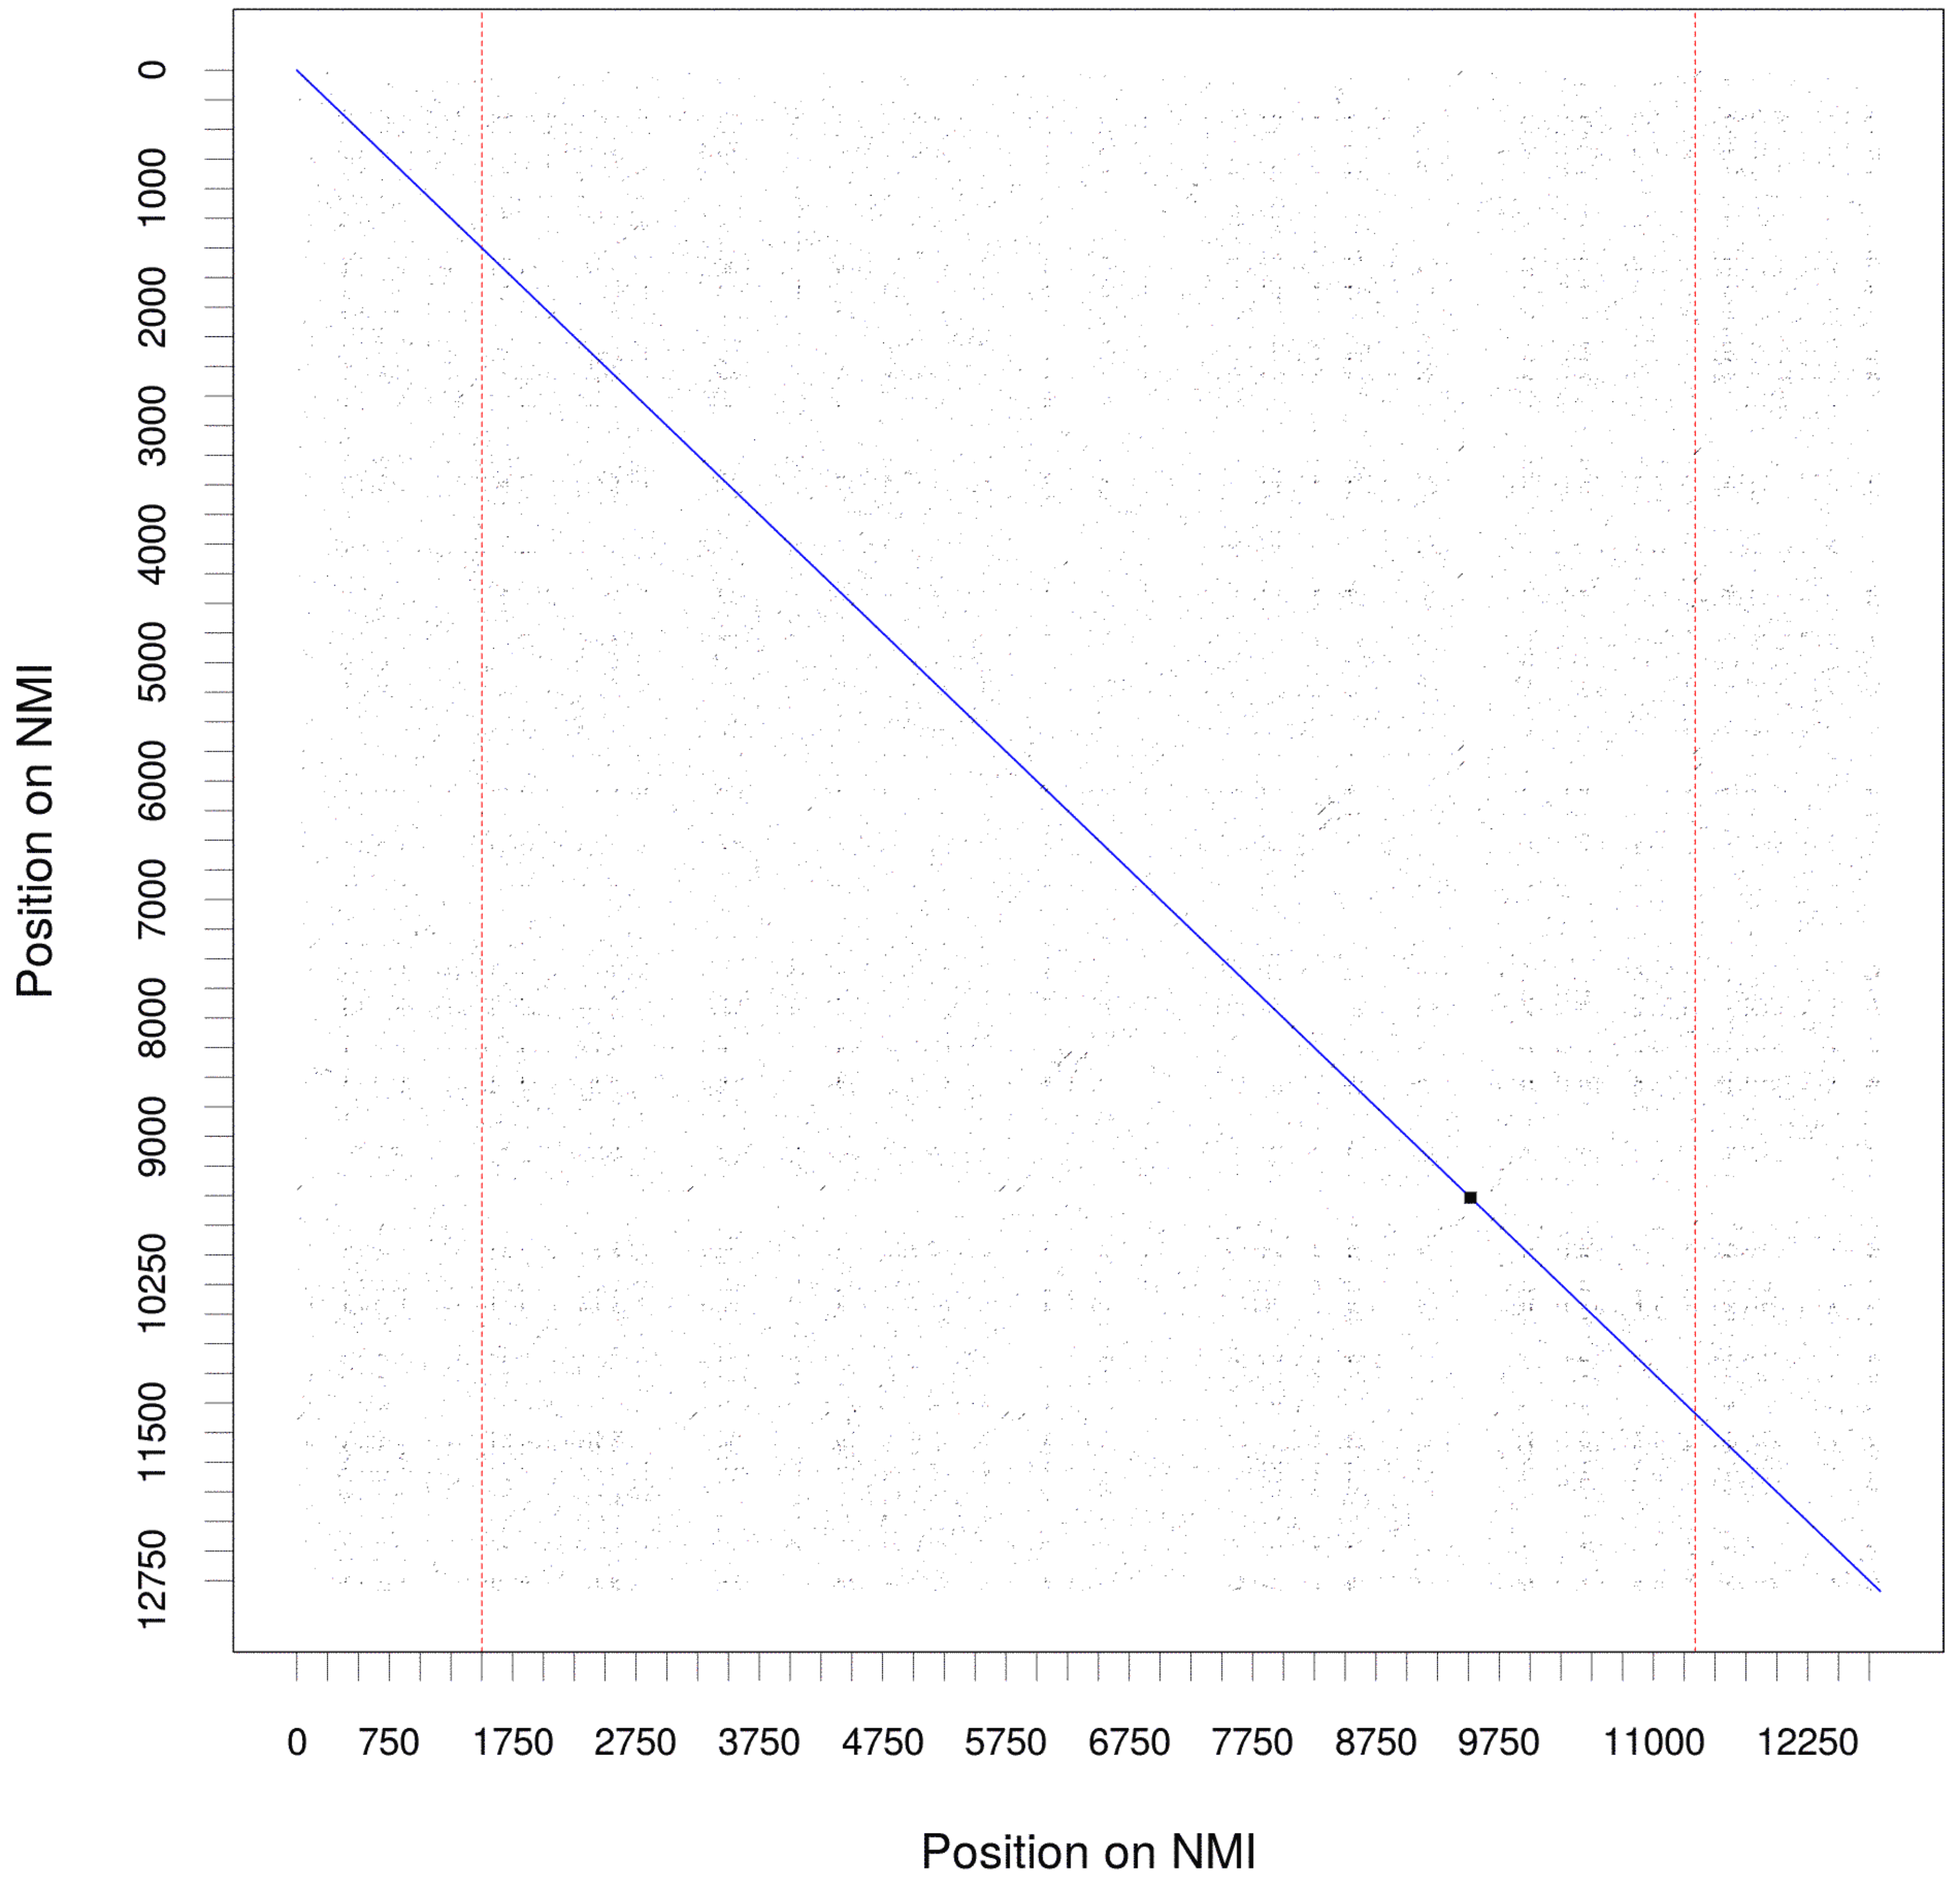



# NSD1

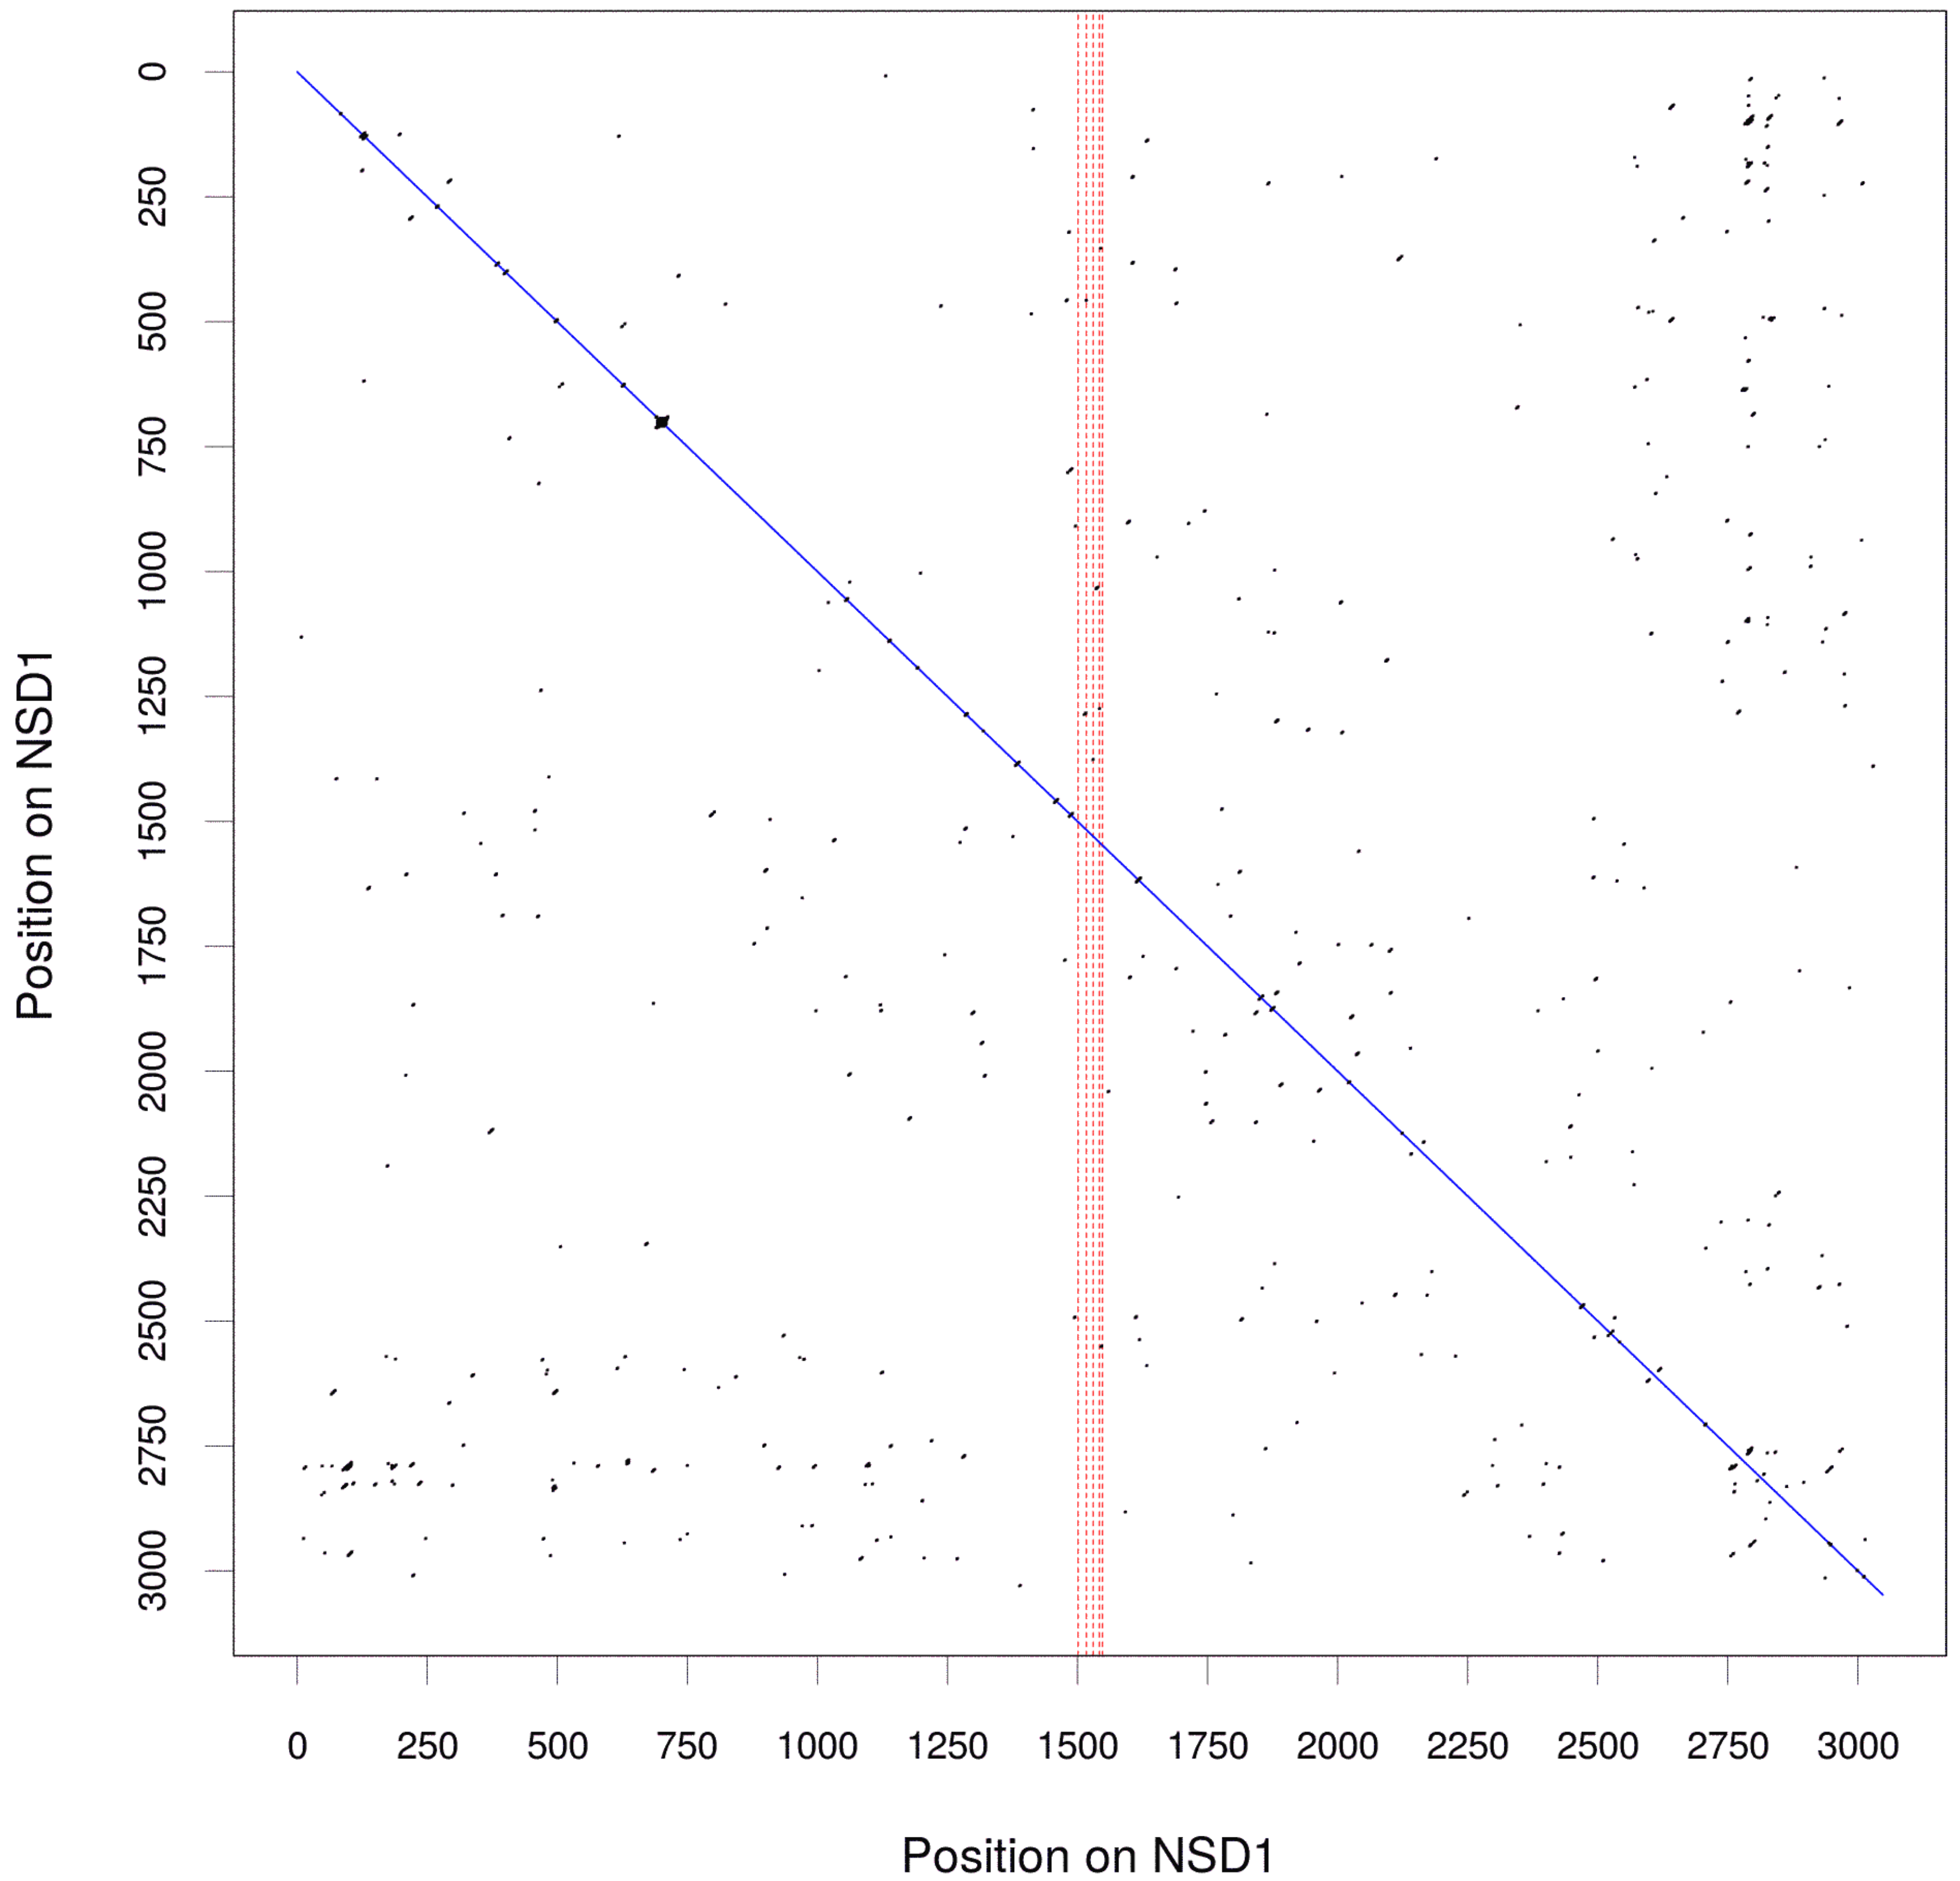

# NUDT9

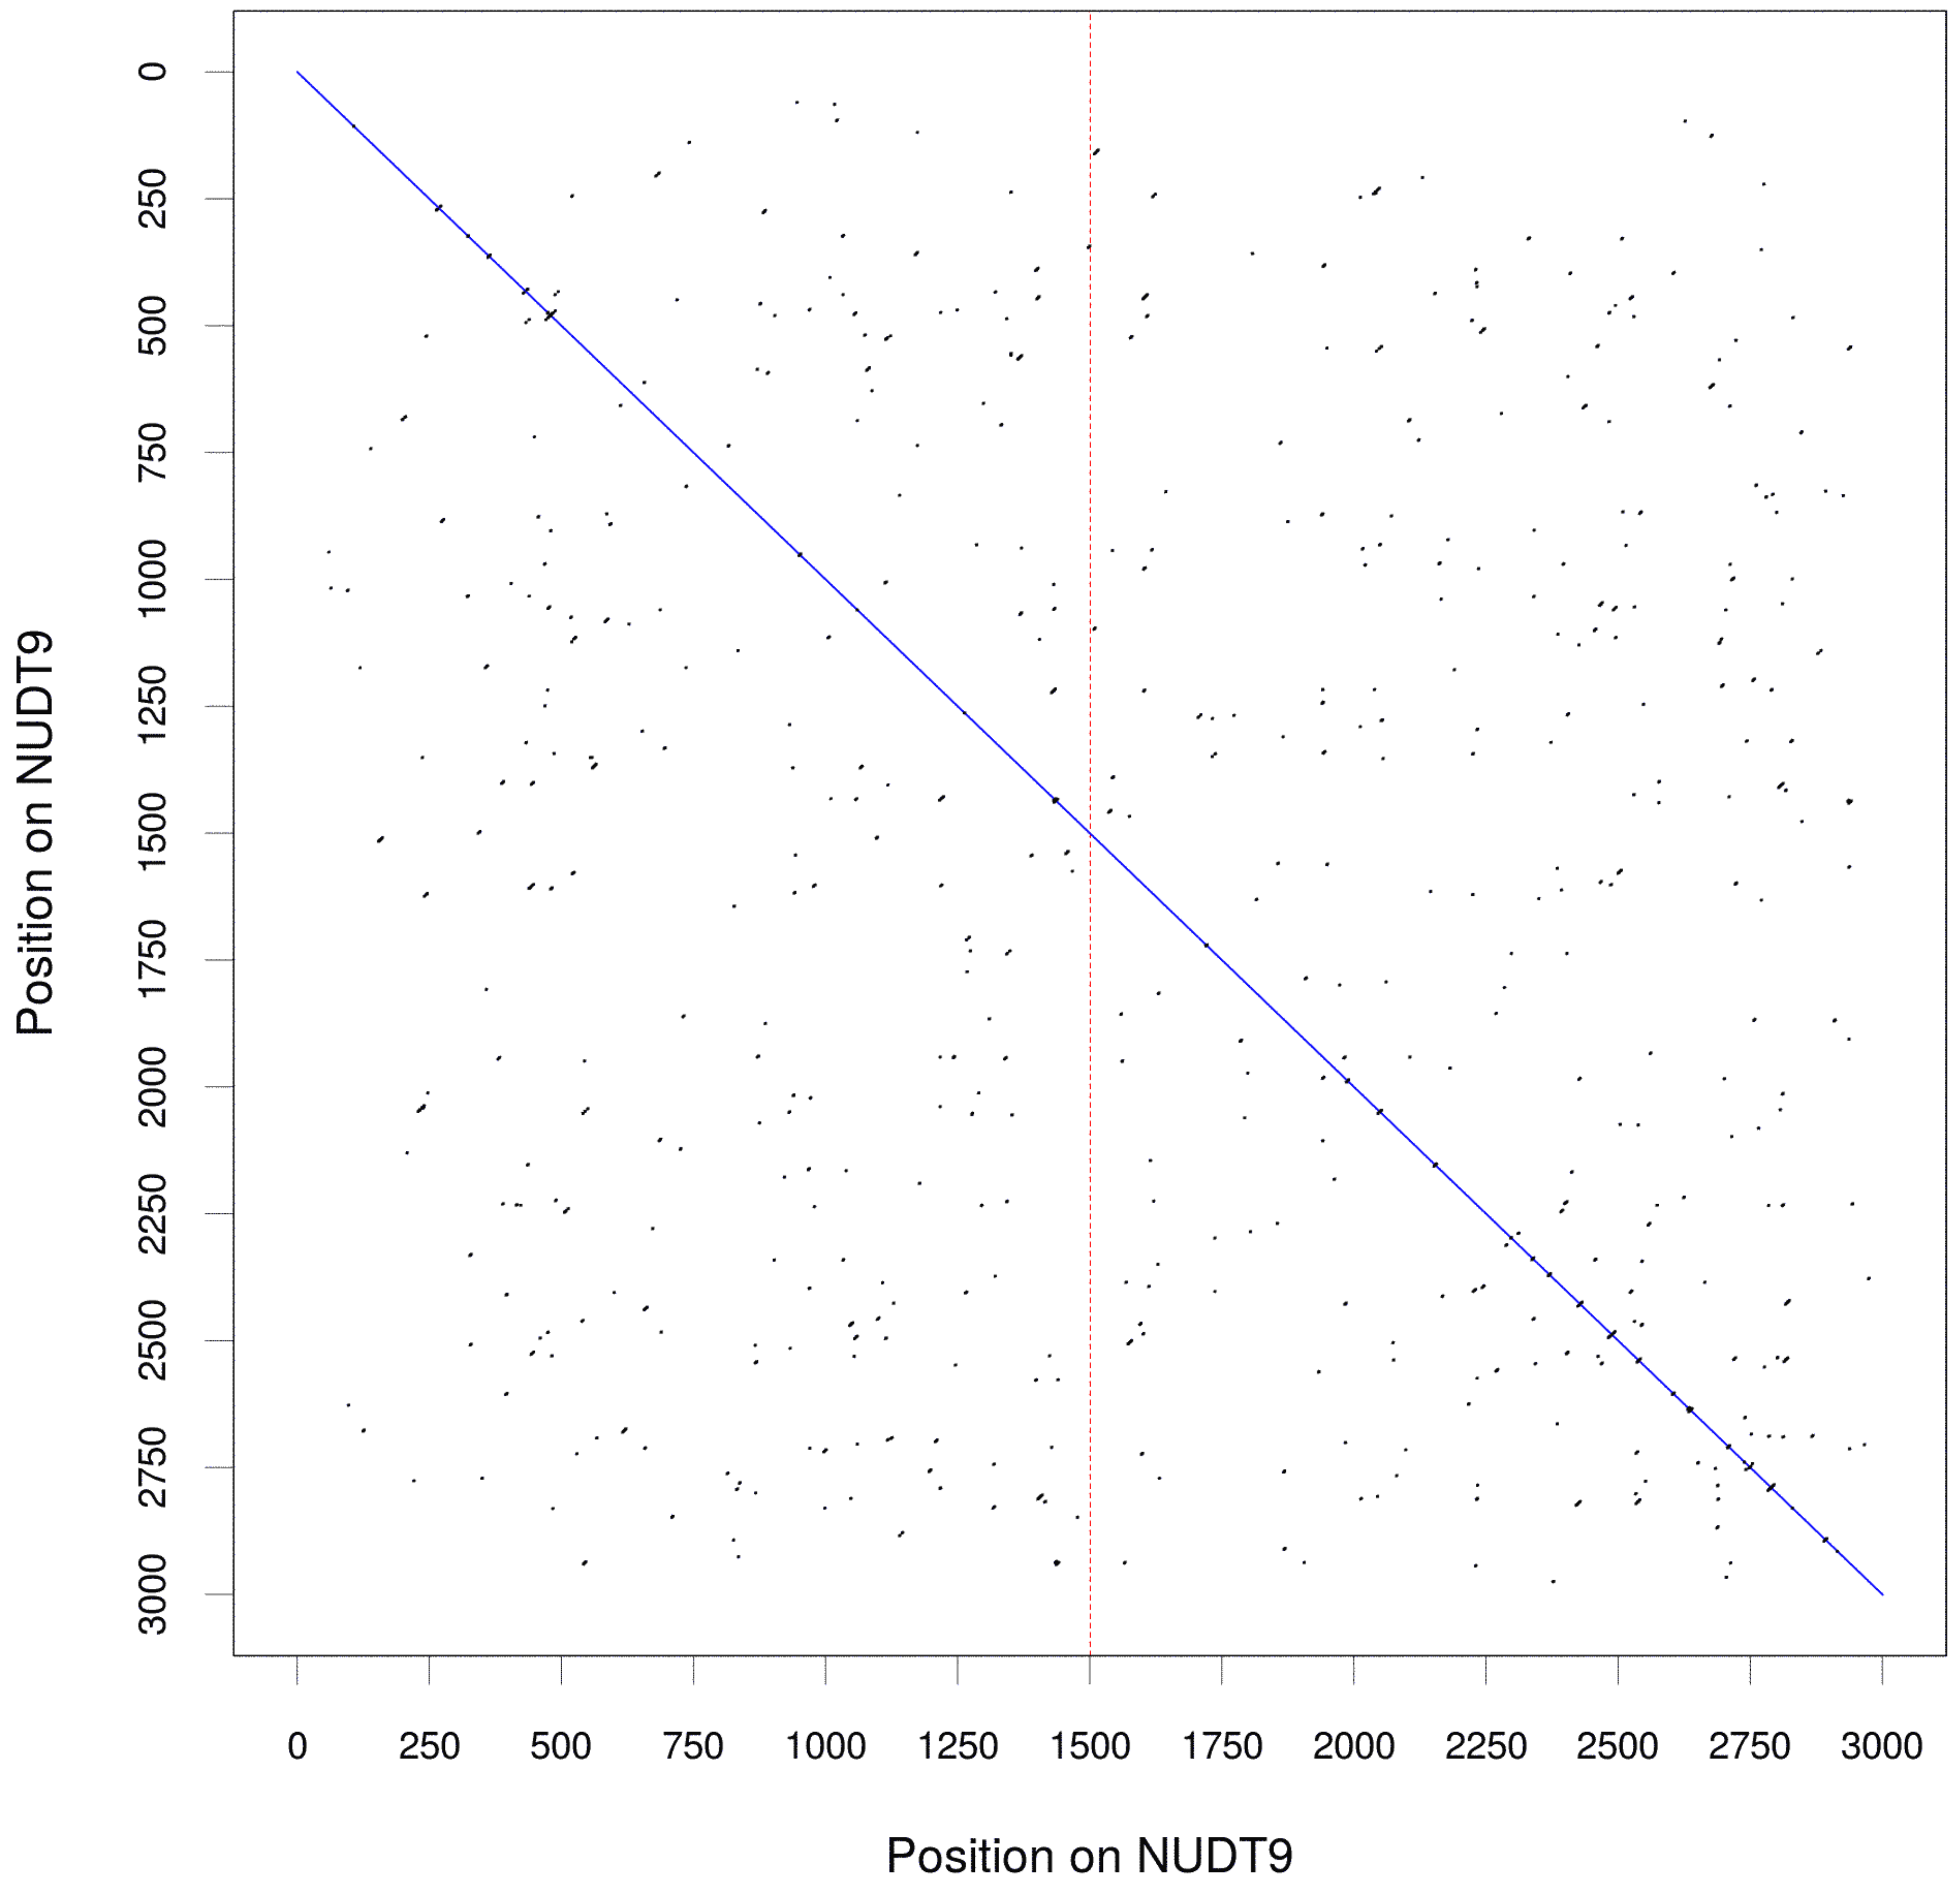

# NUMB

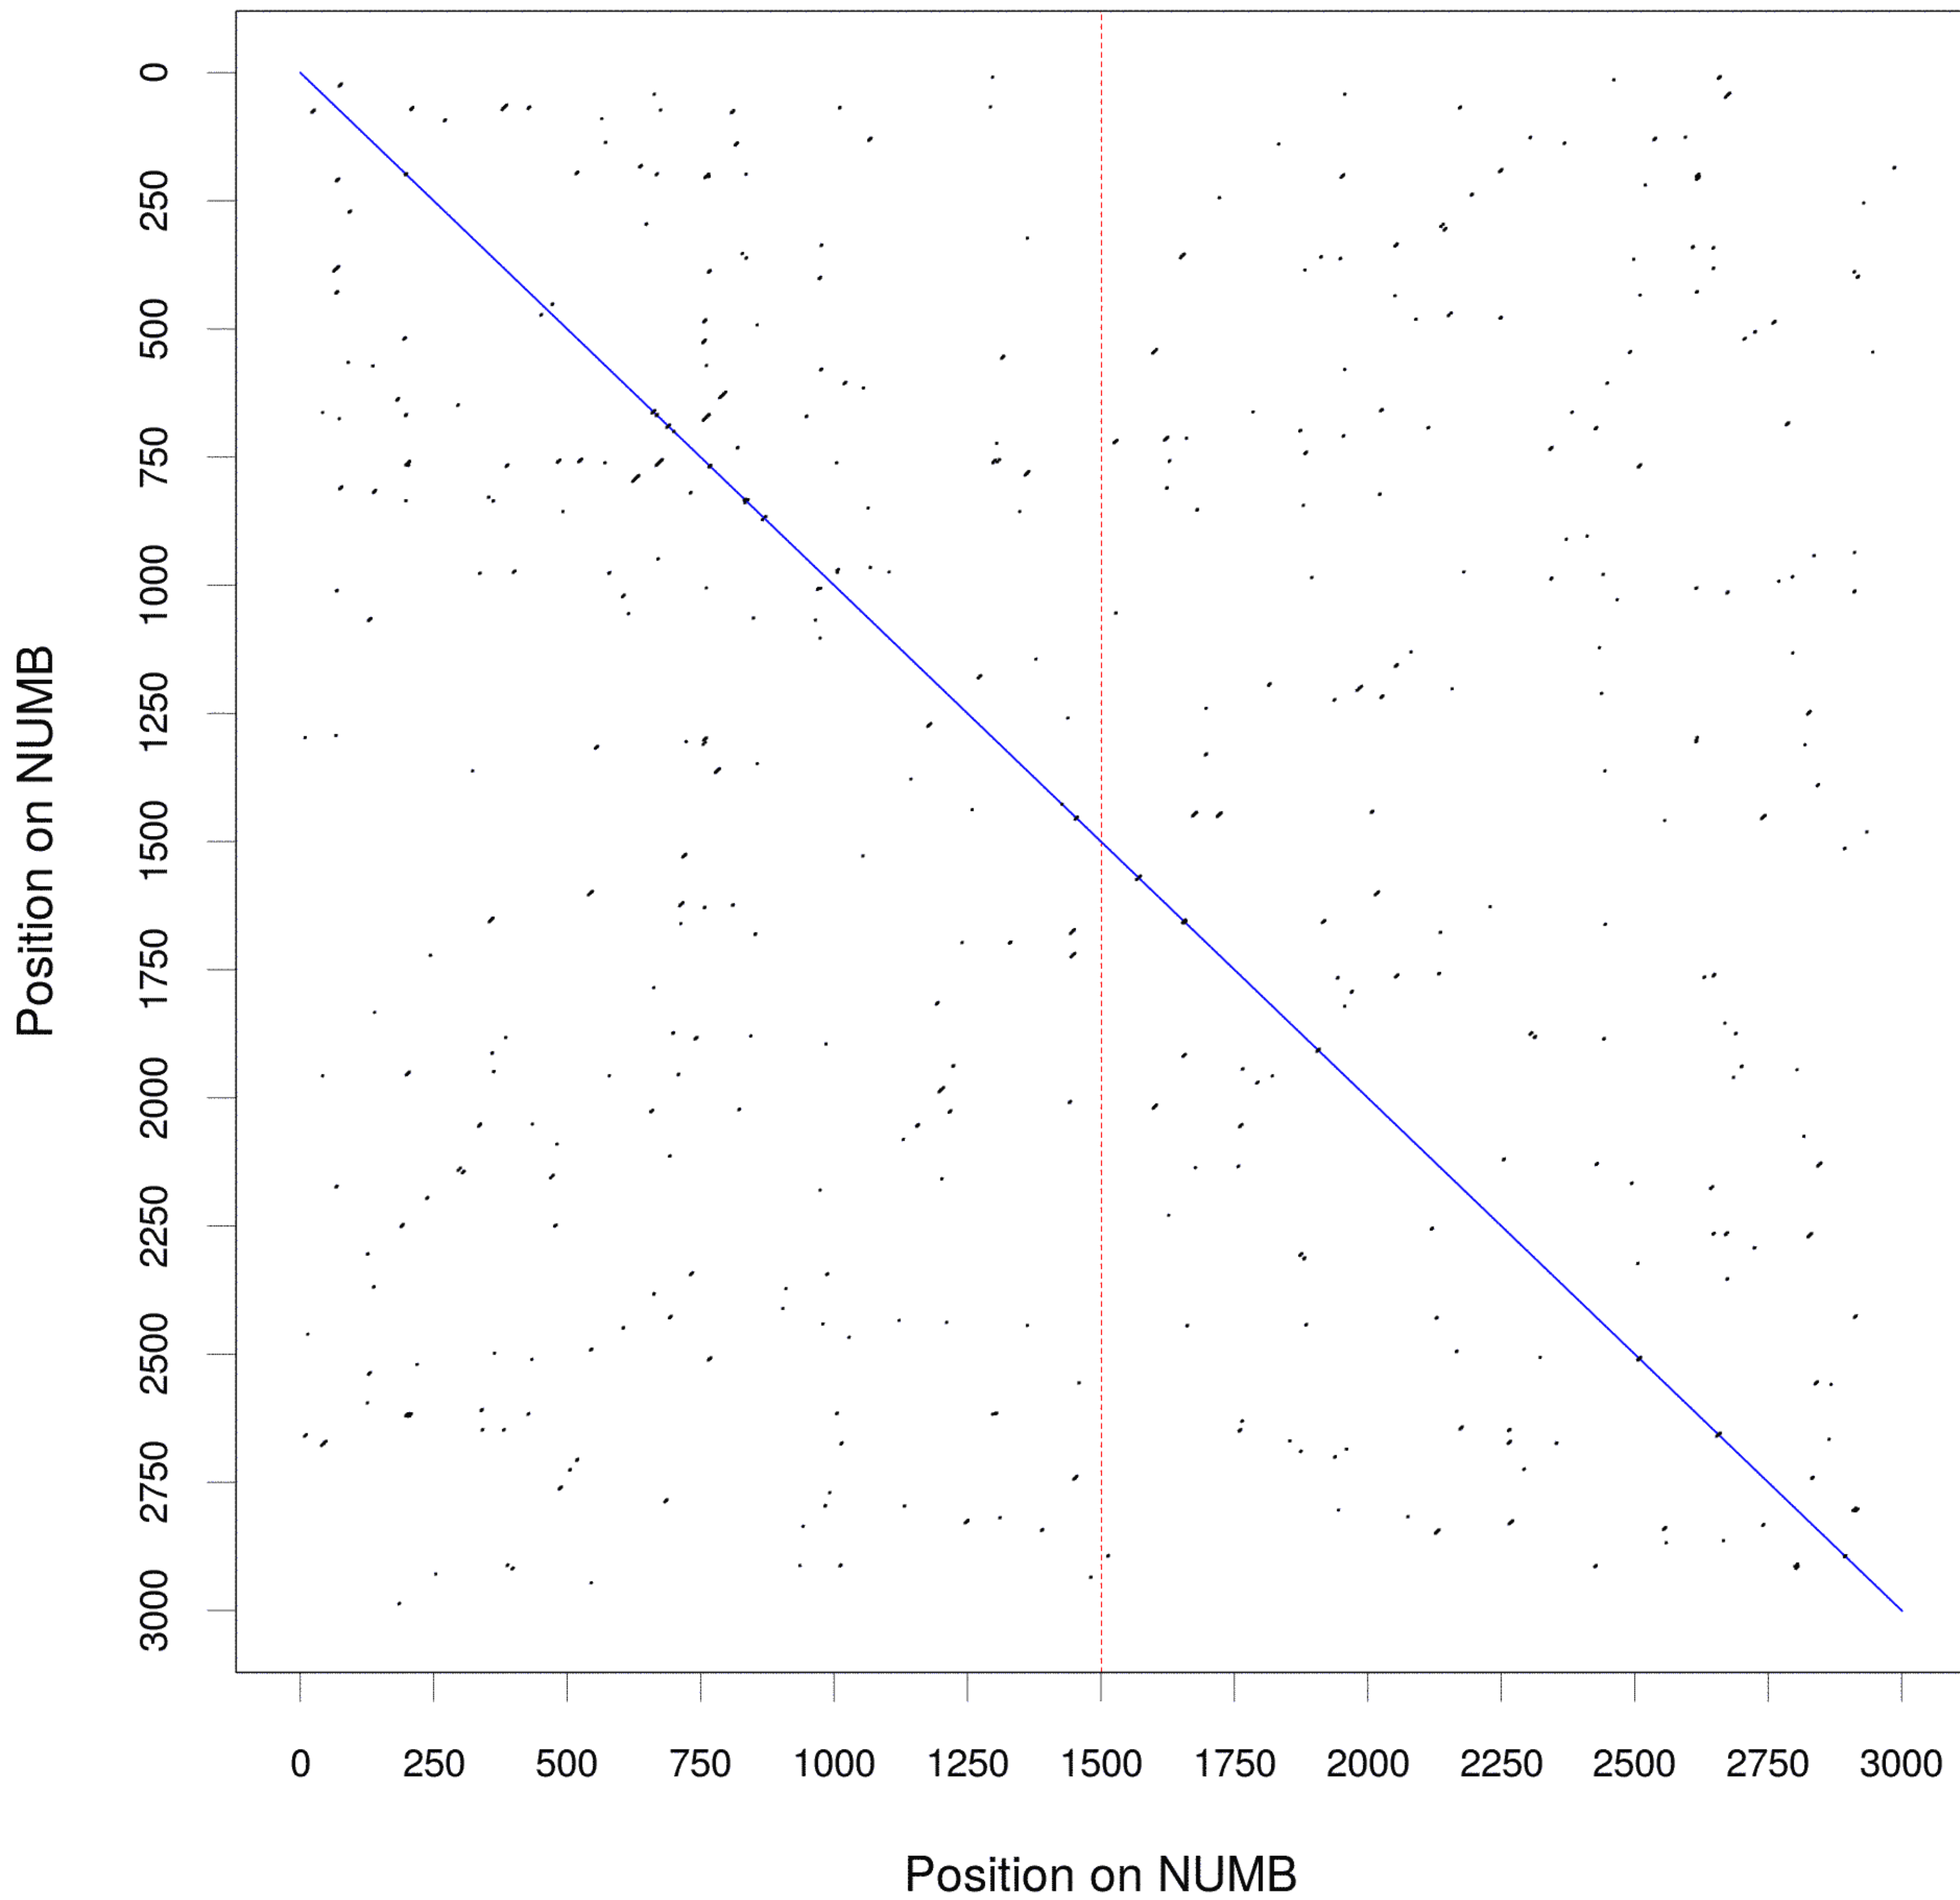

# NVL

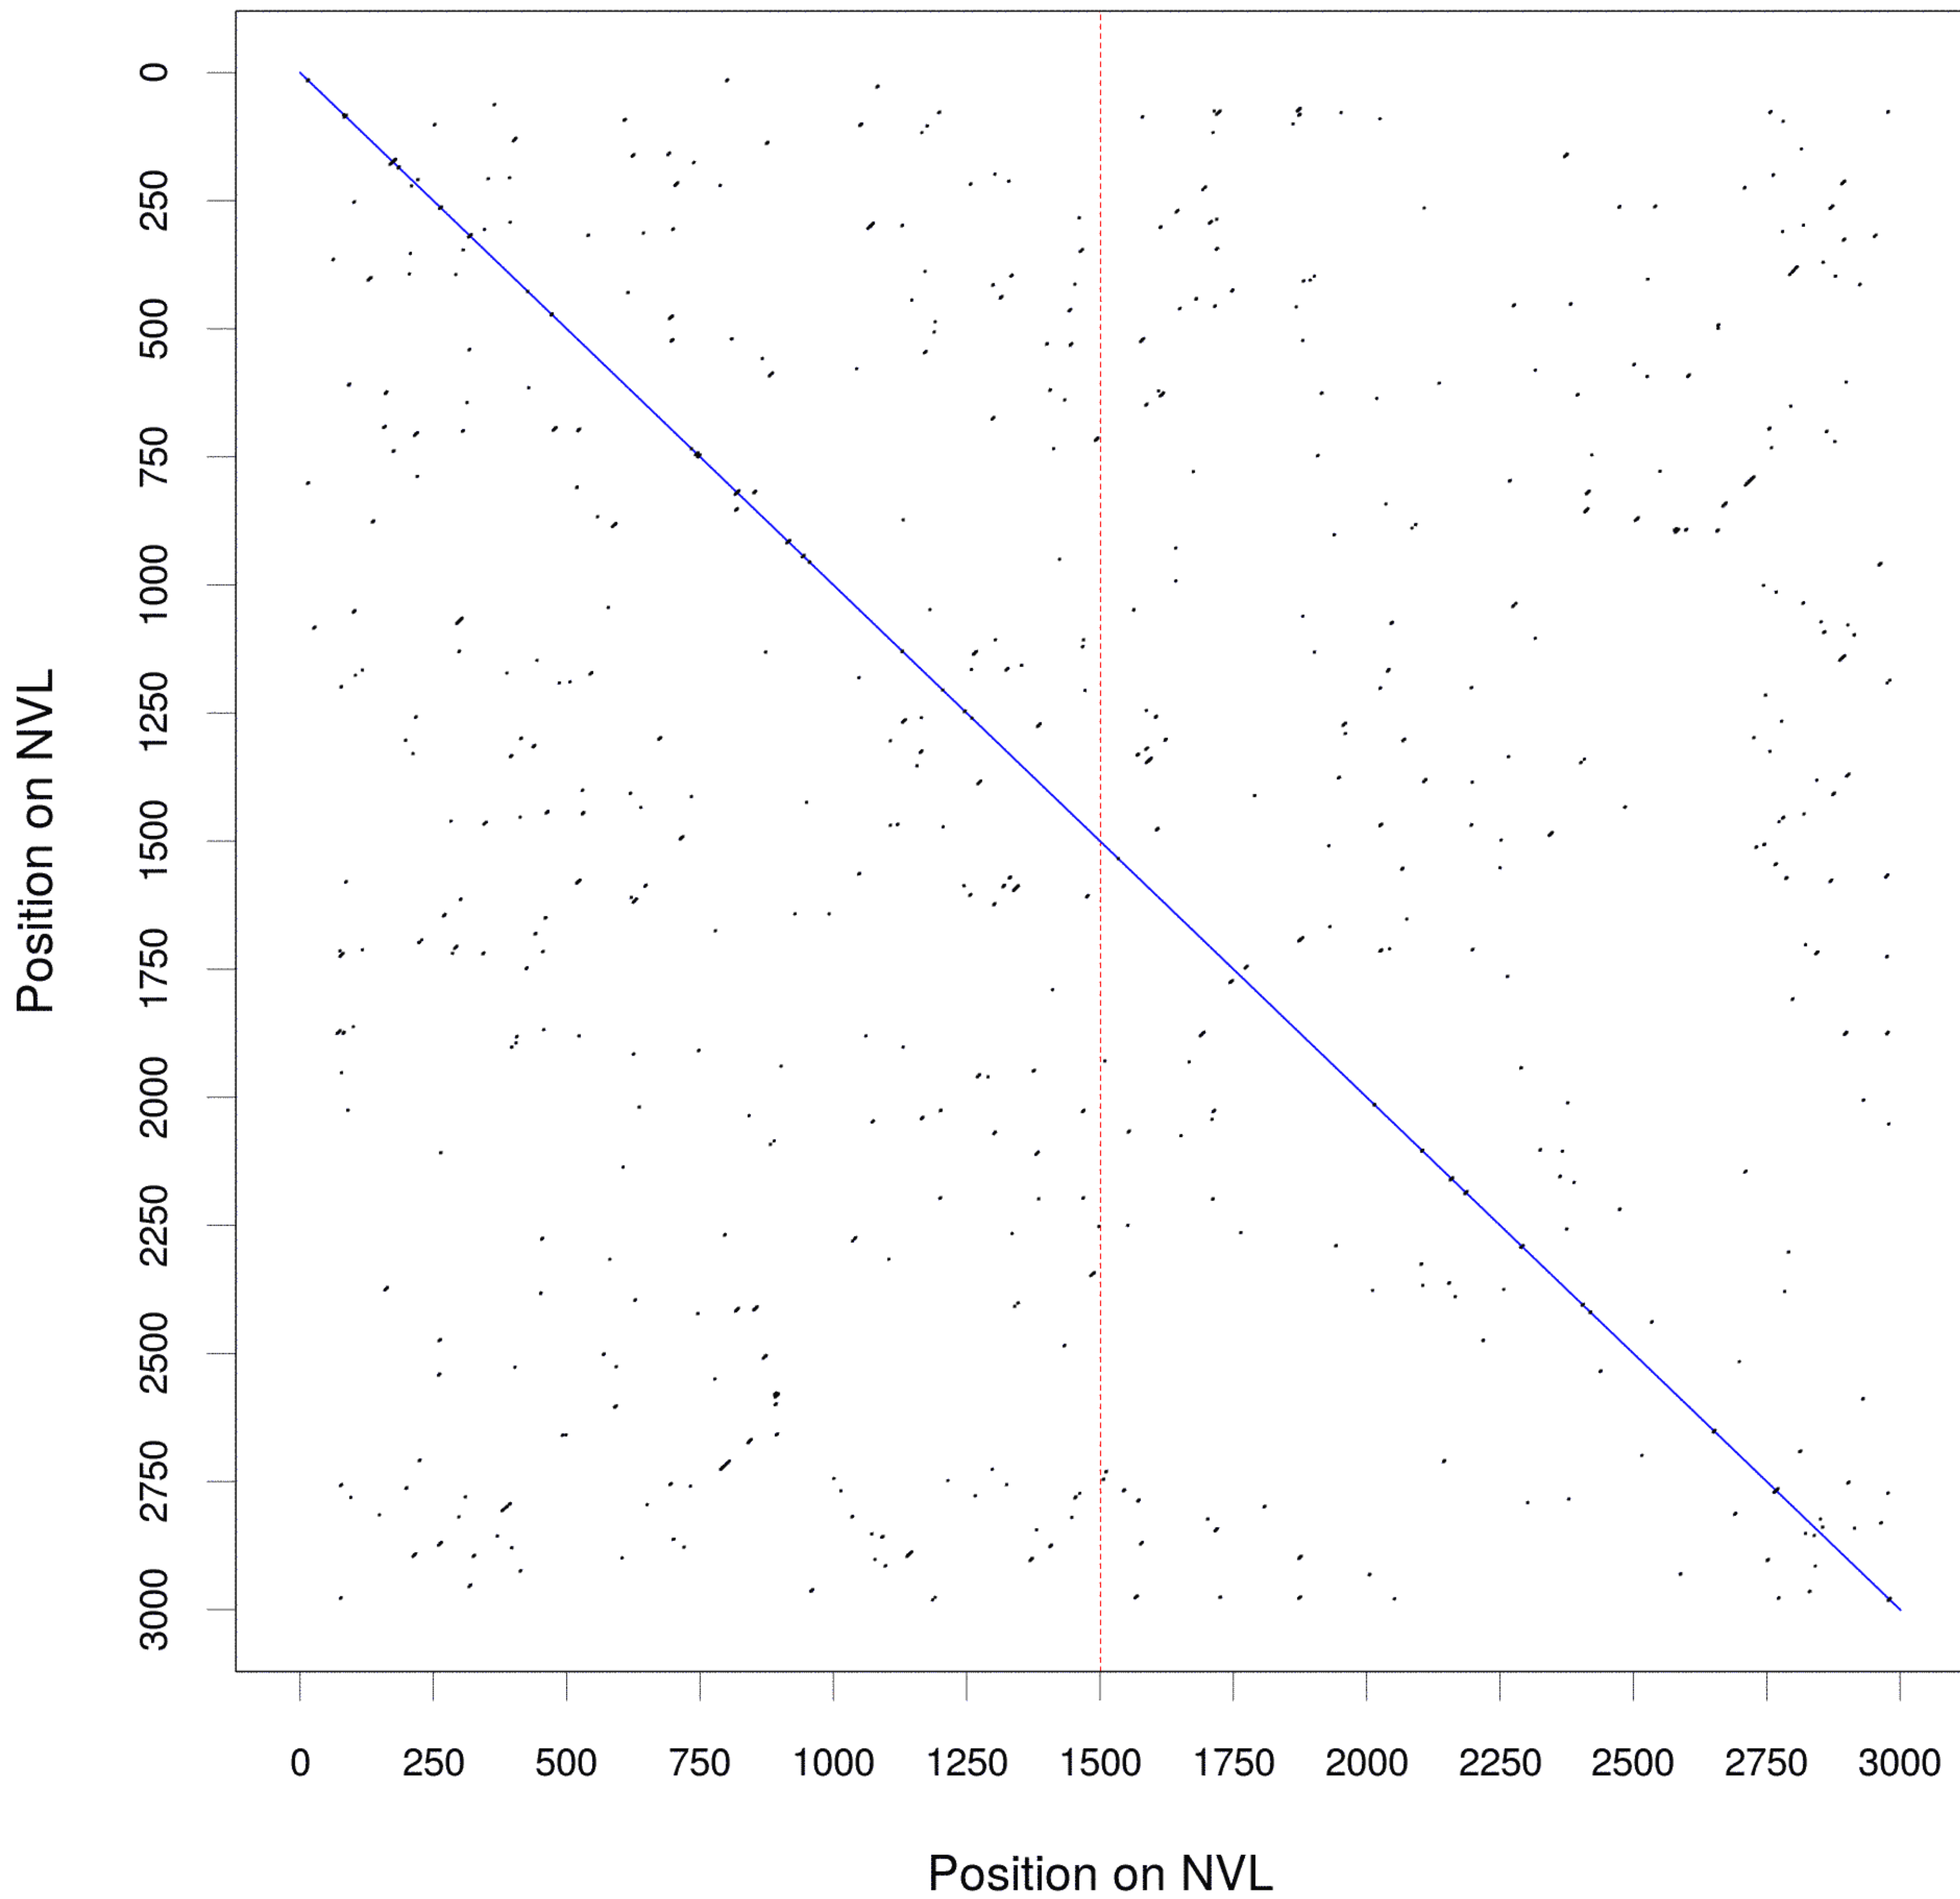

# ORC4

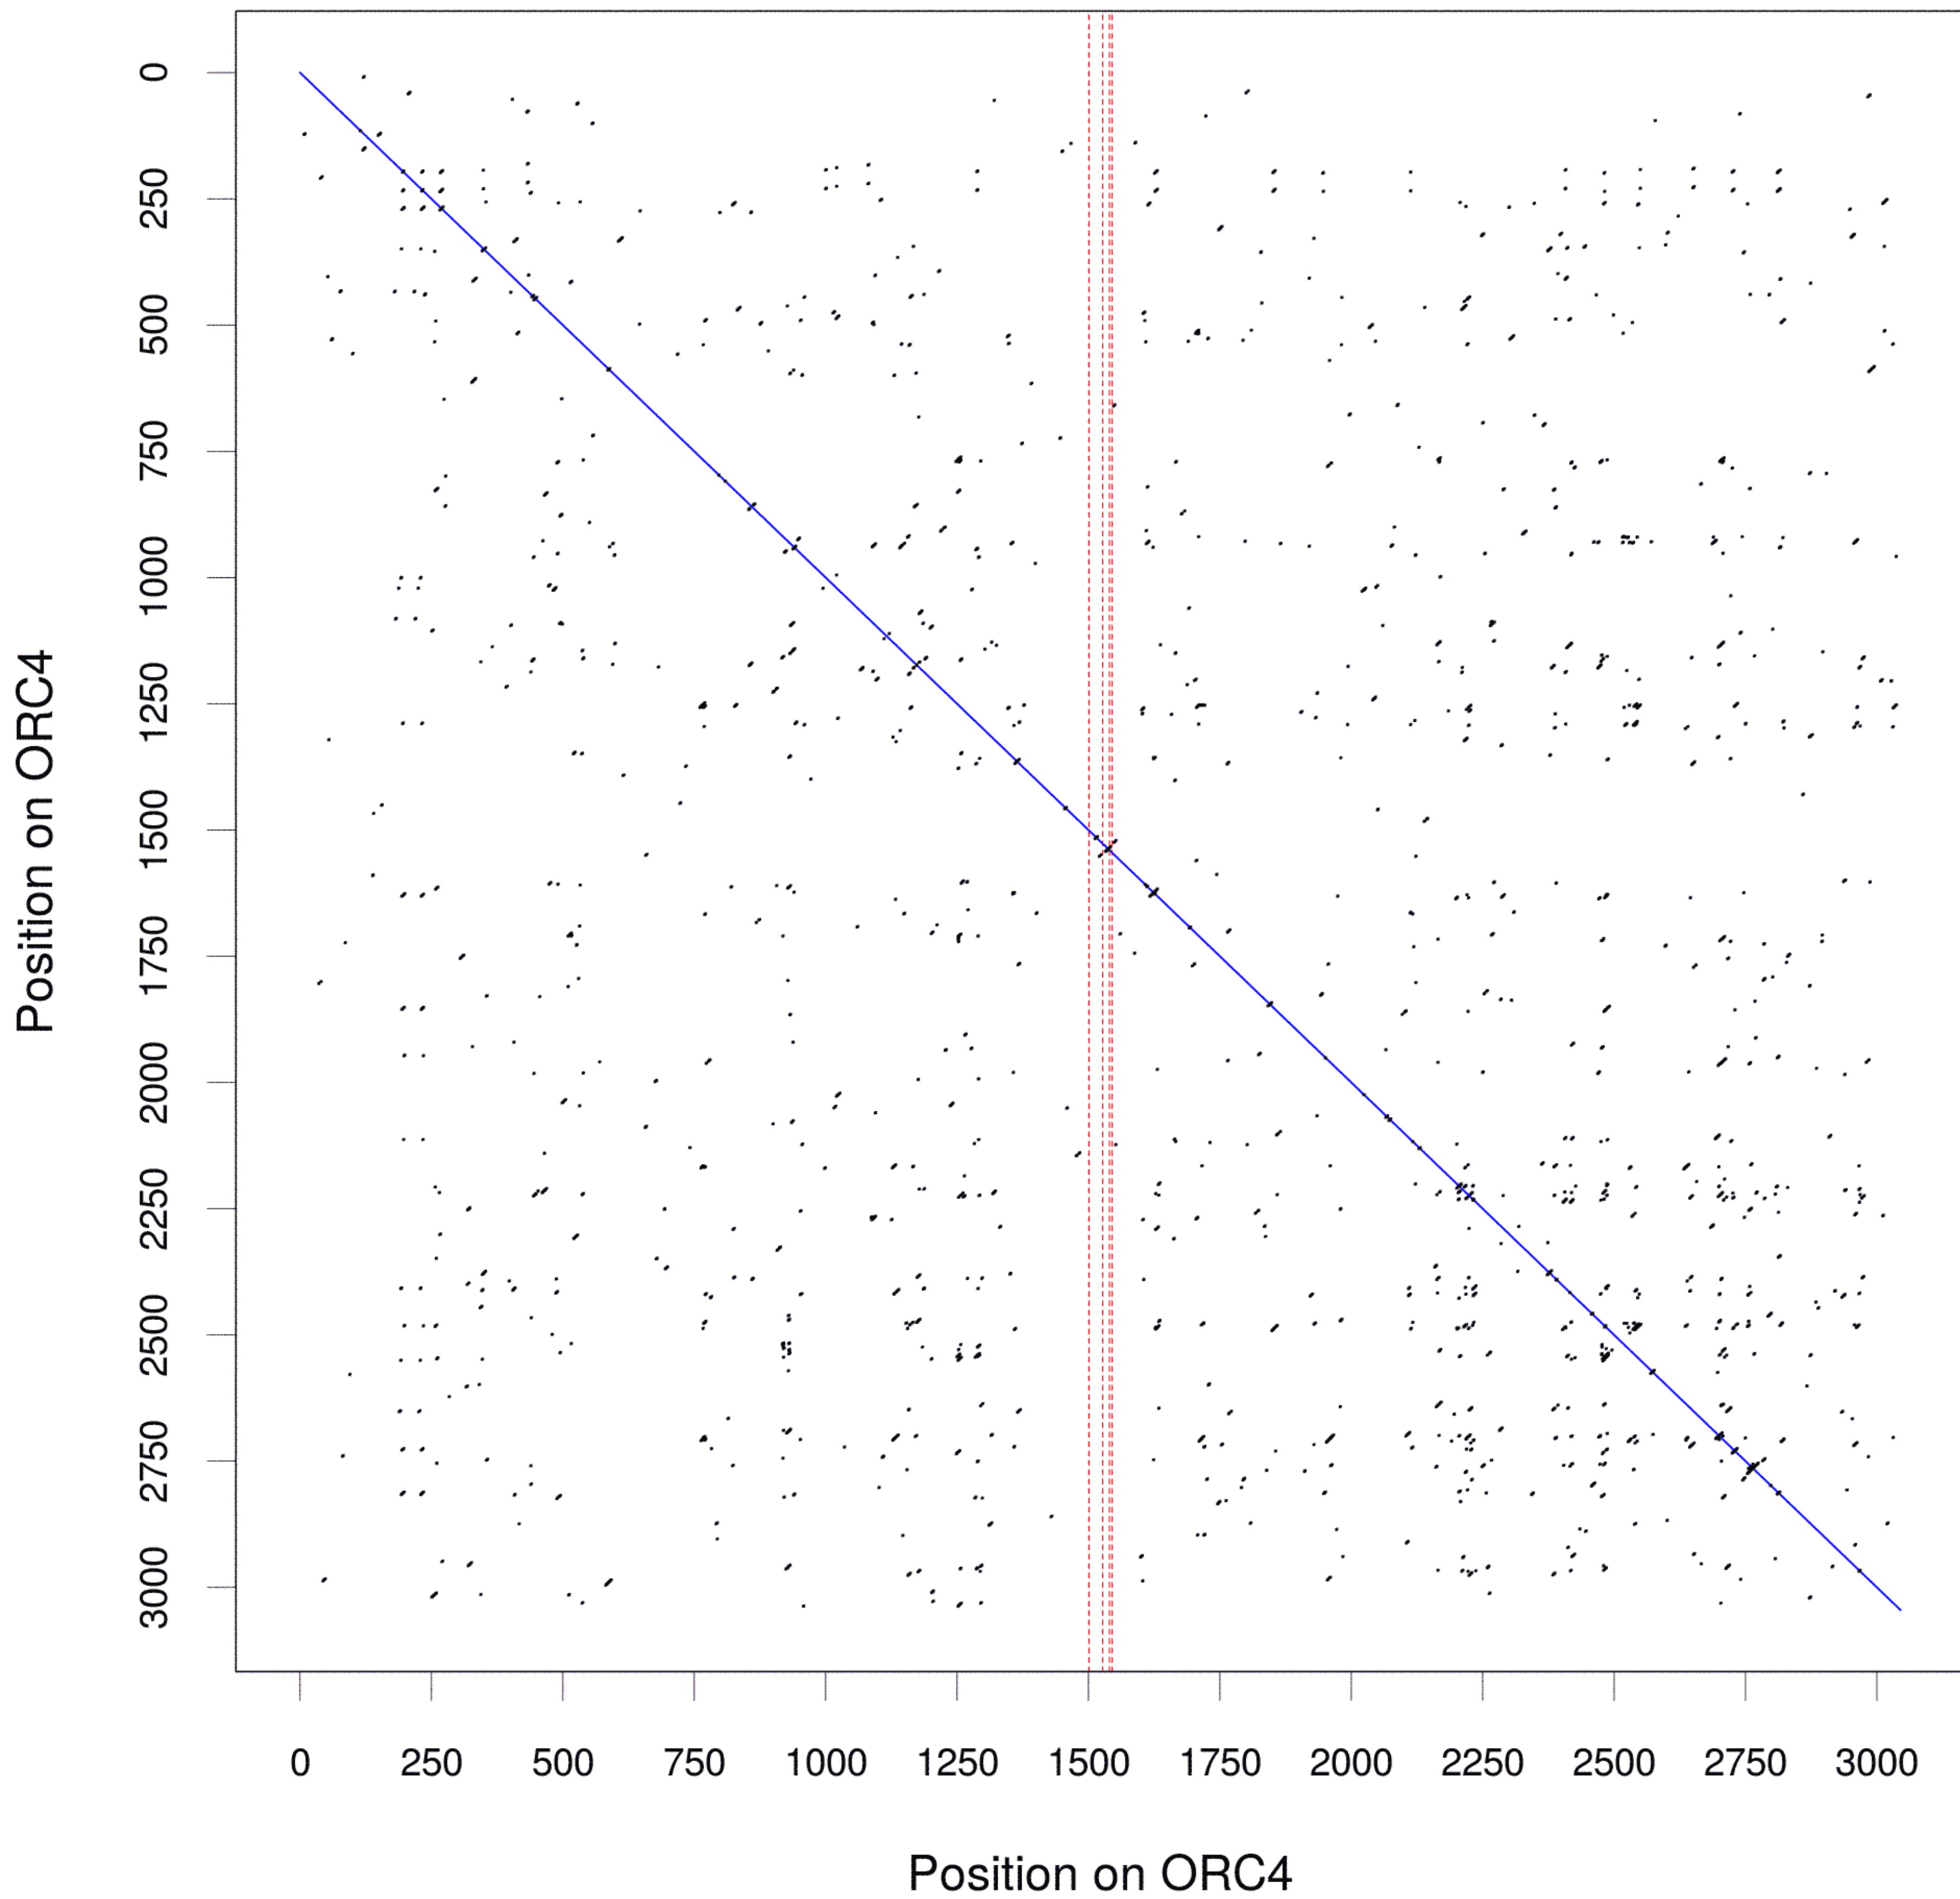

# OSMR

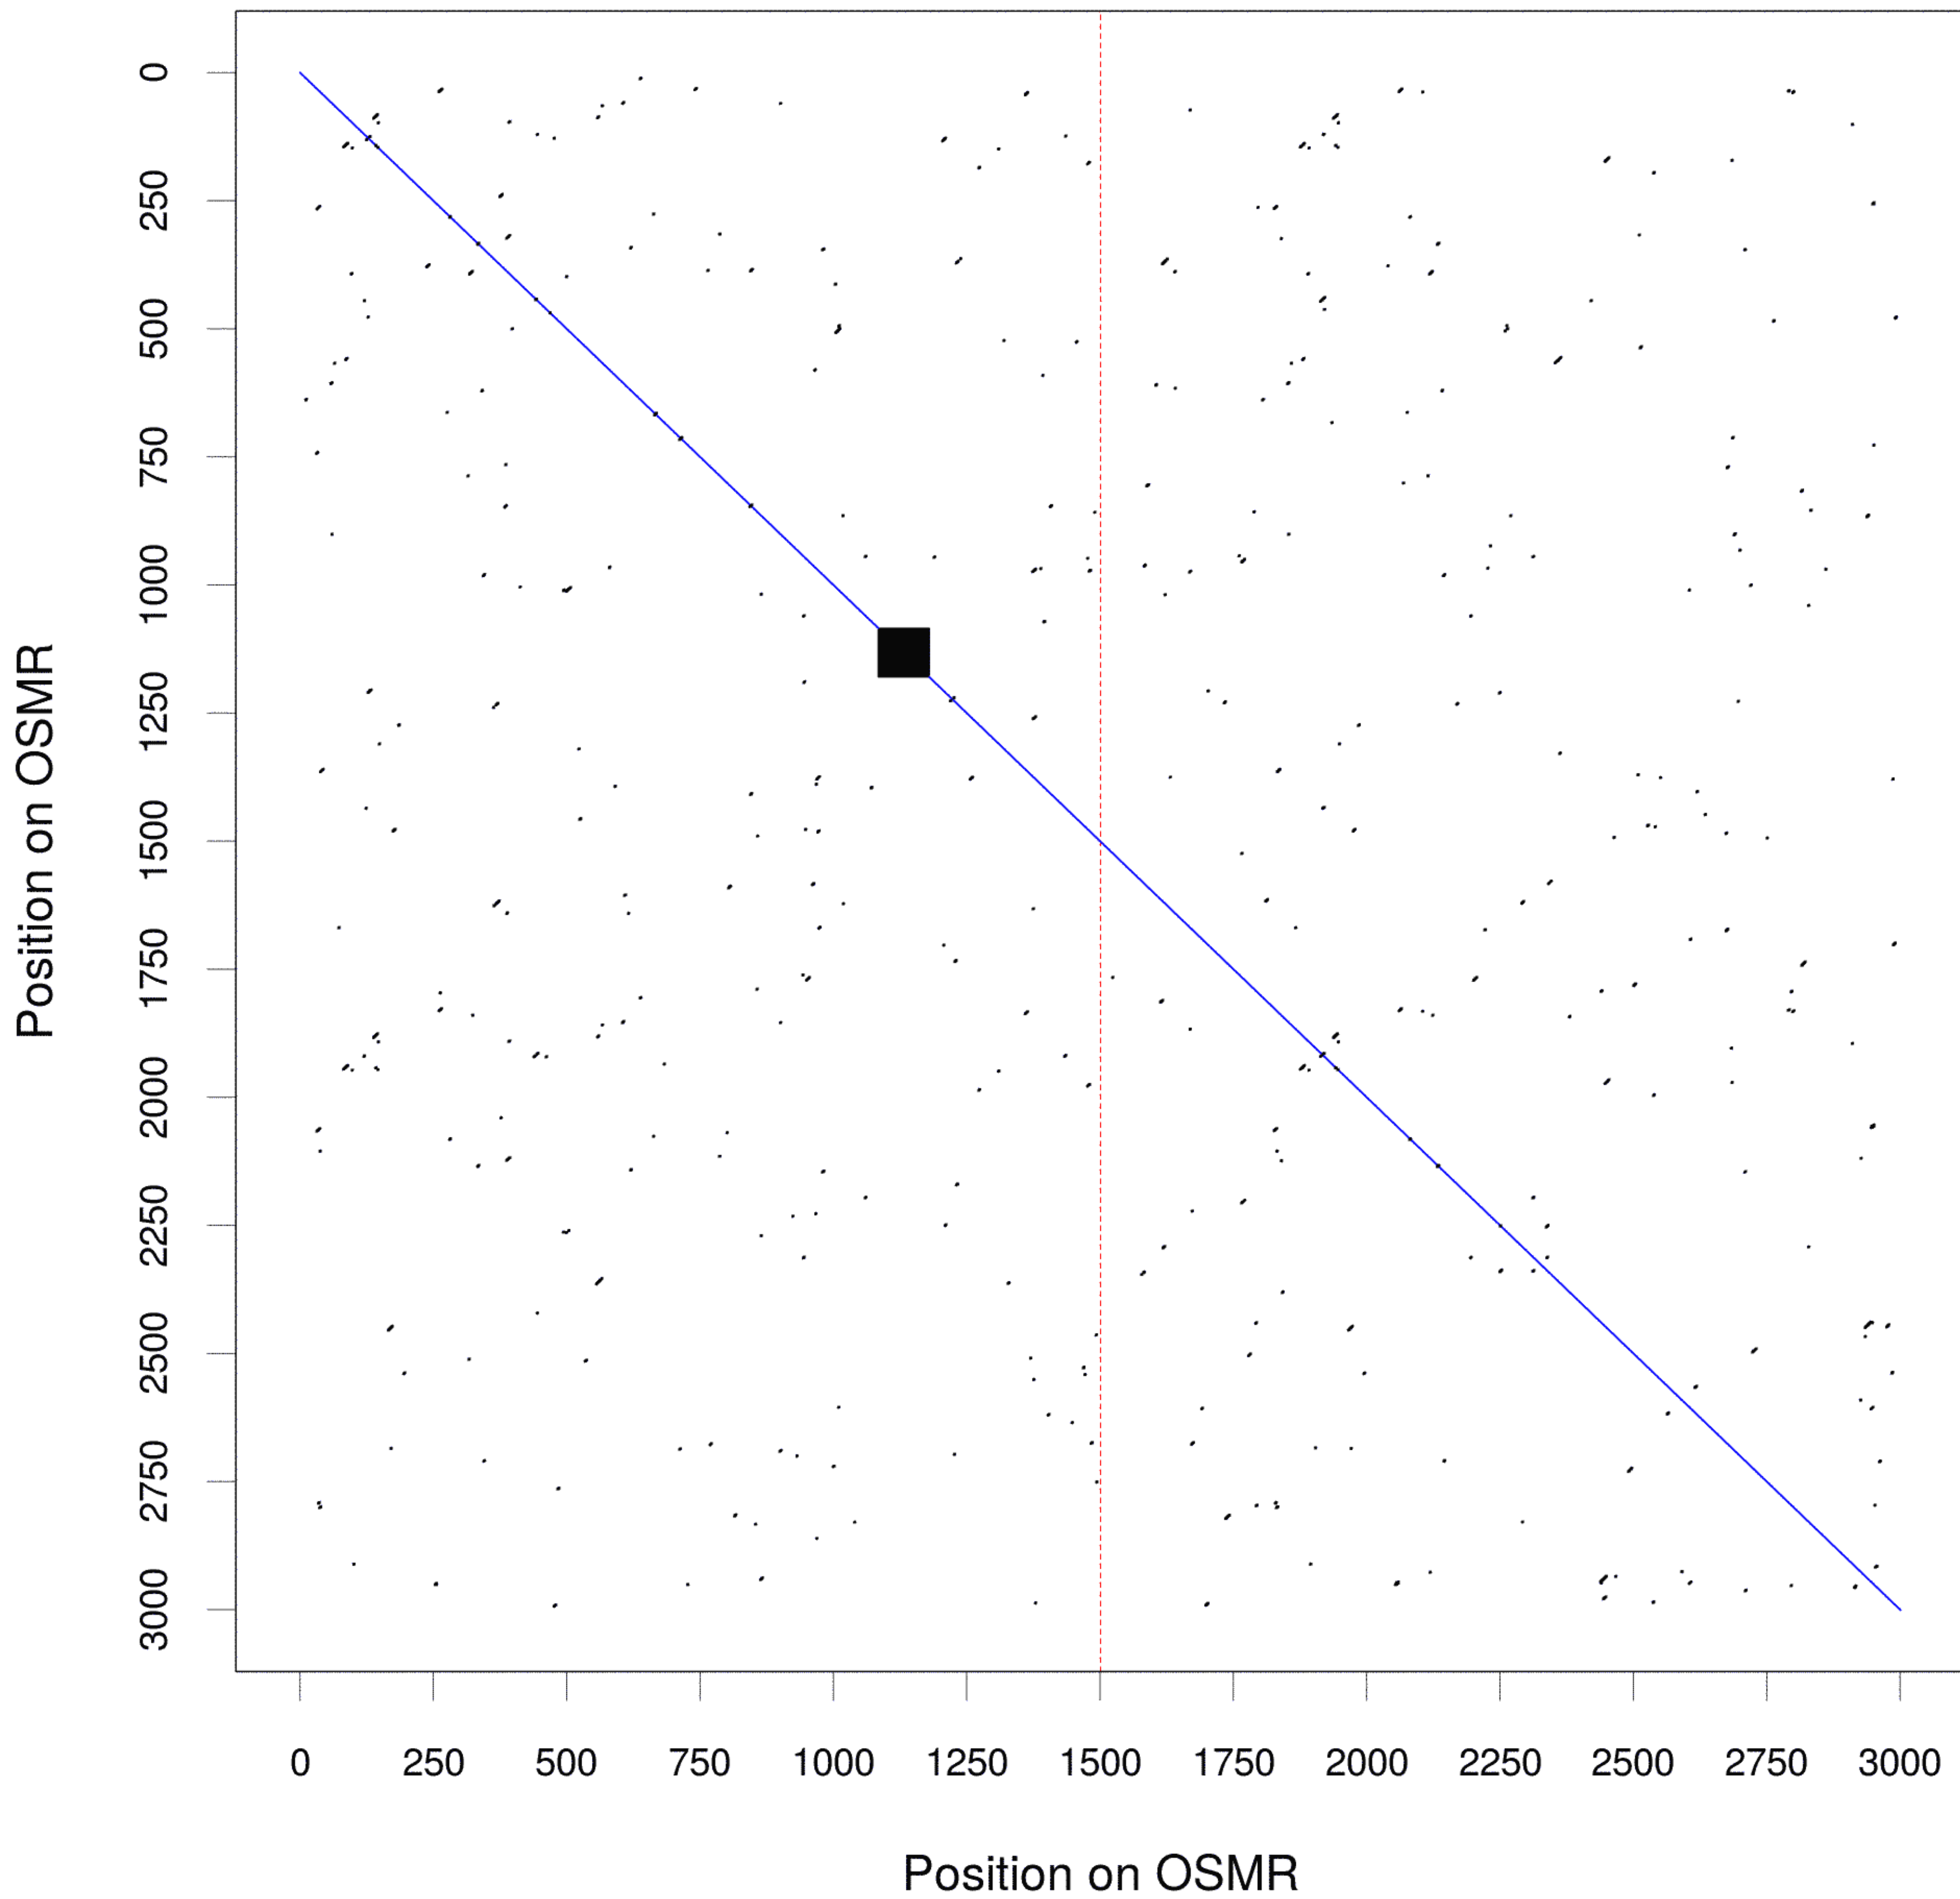

# OSTC

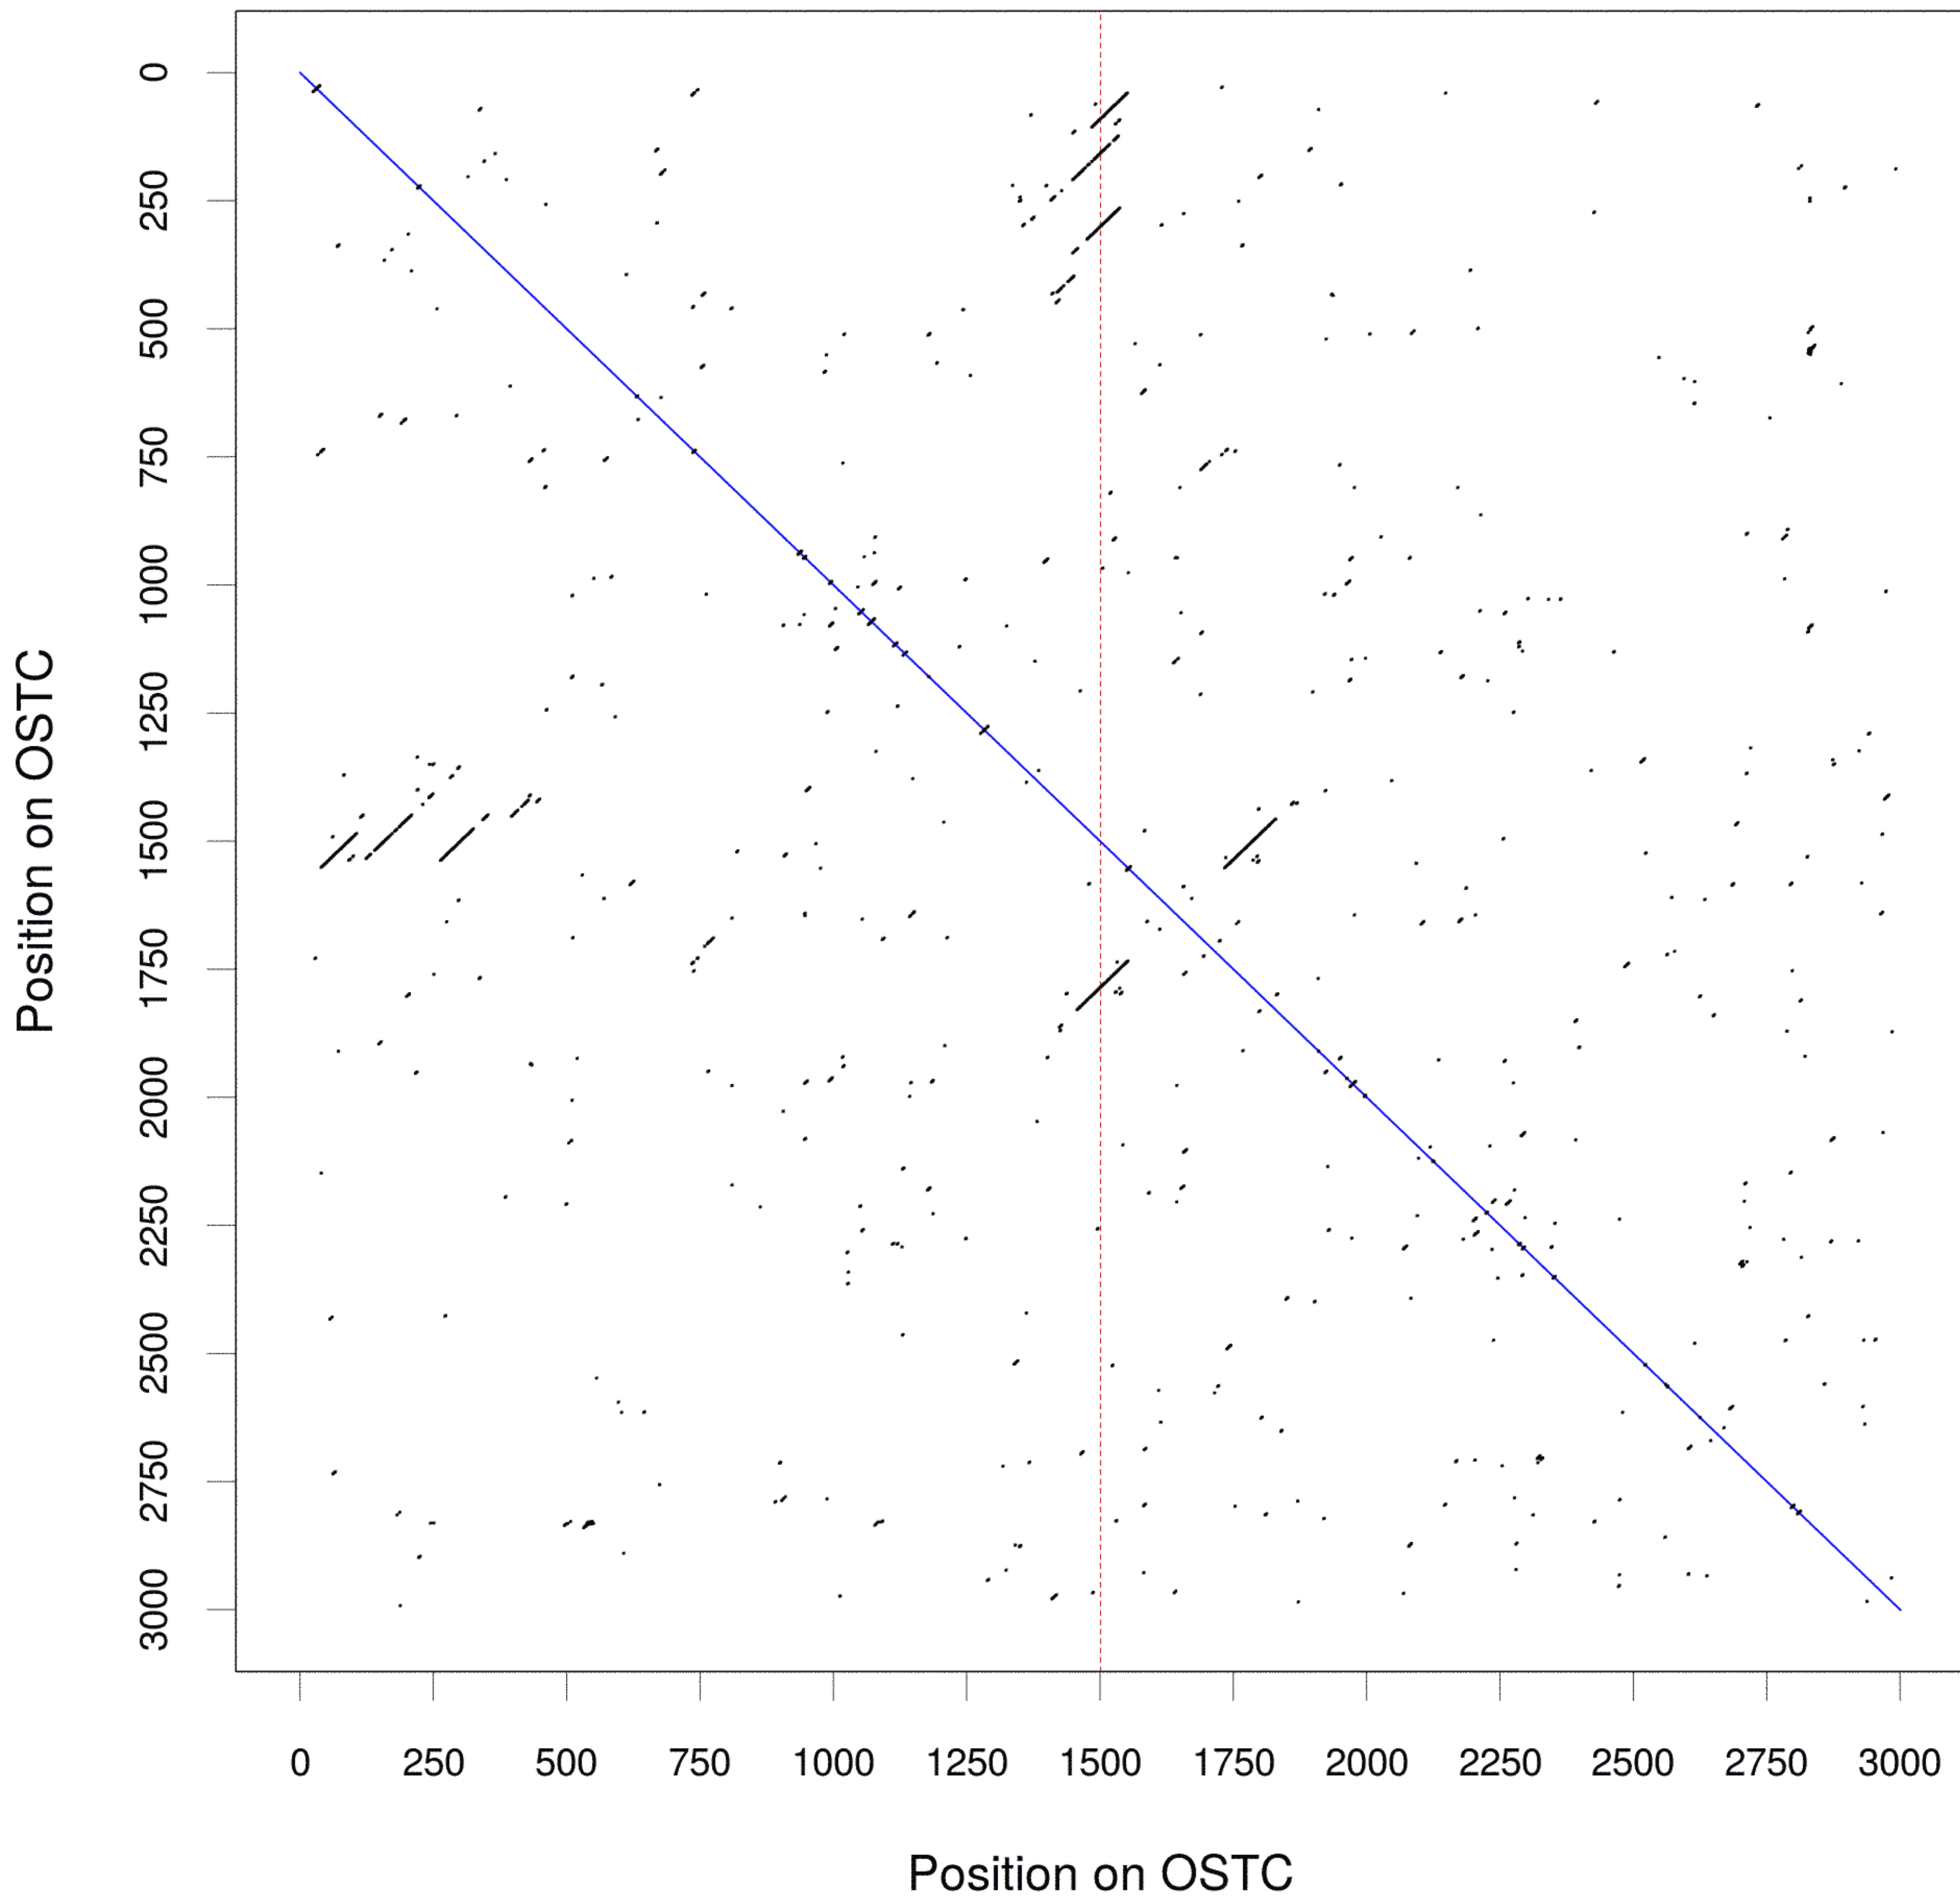

# OTUB1

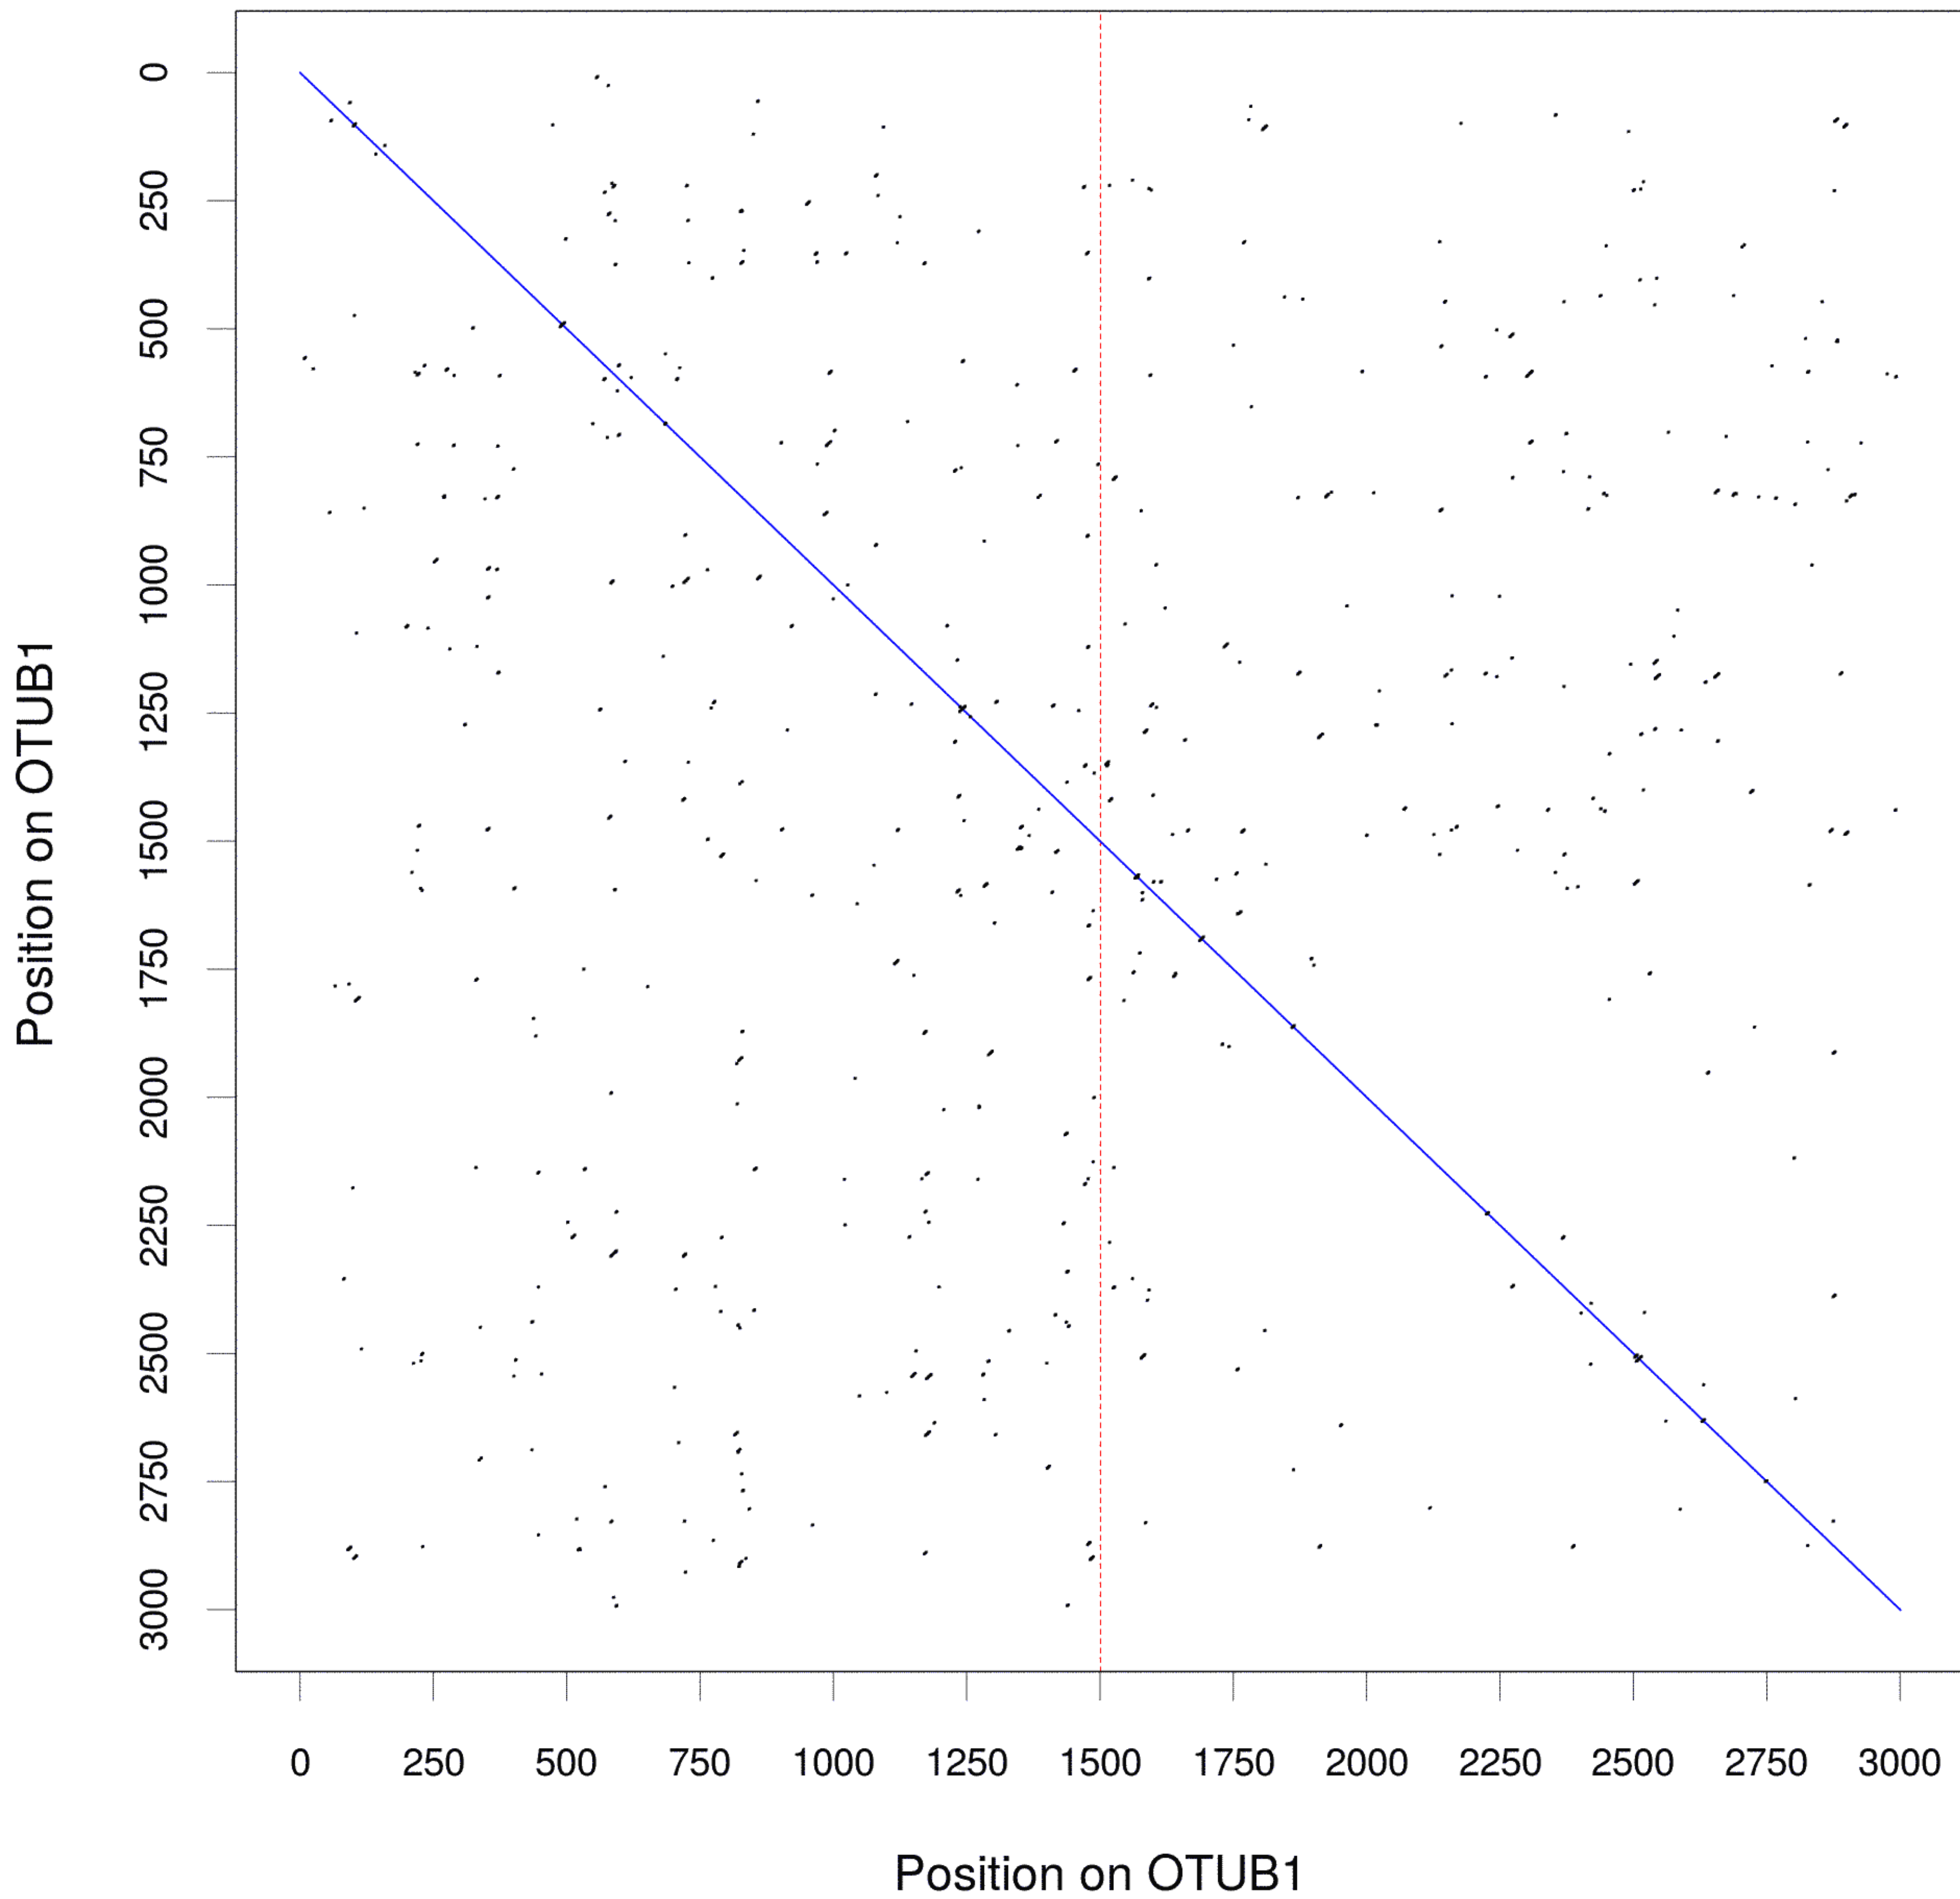



# PAIP2

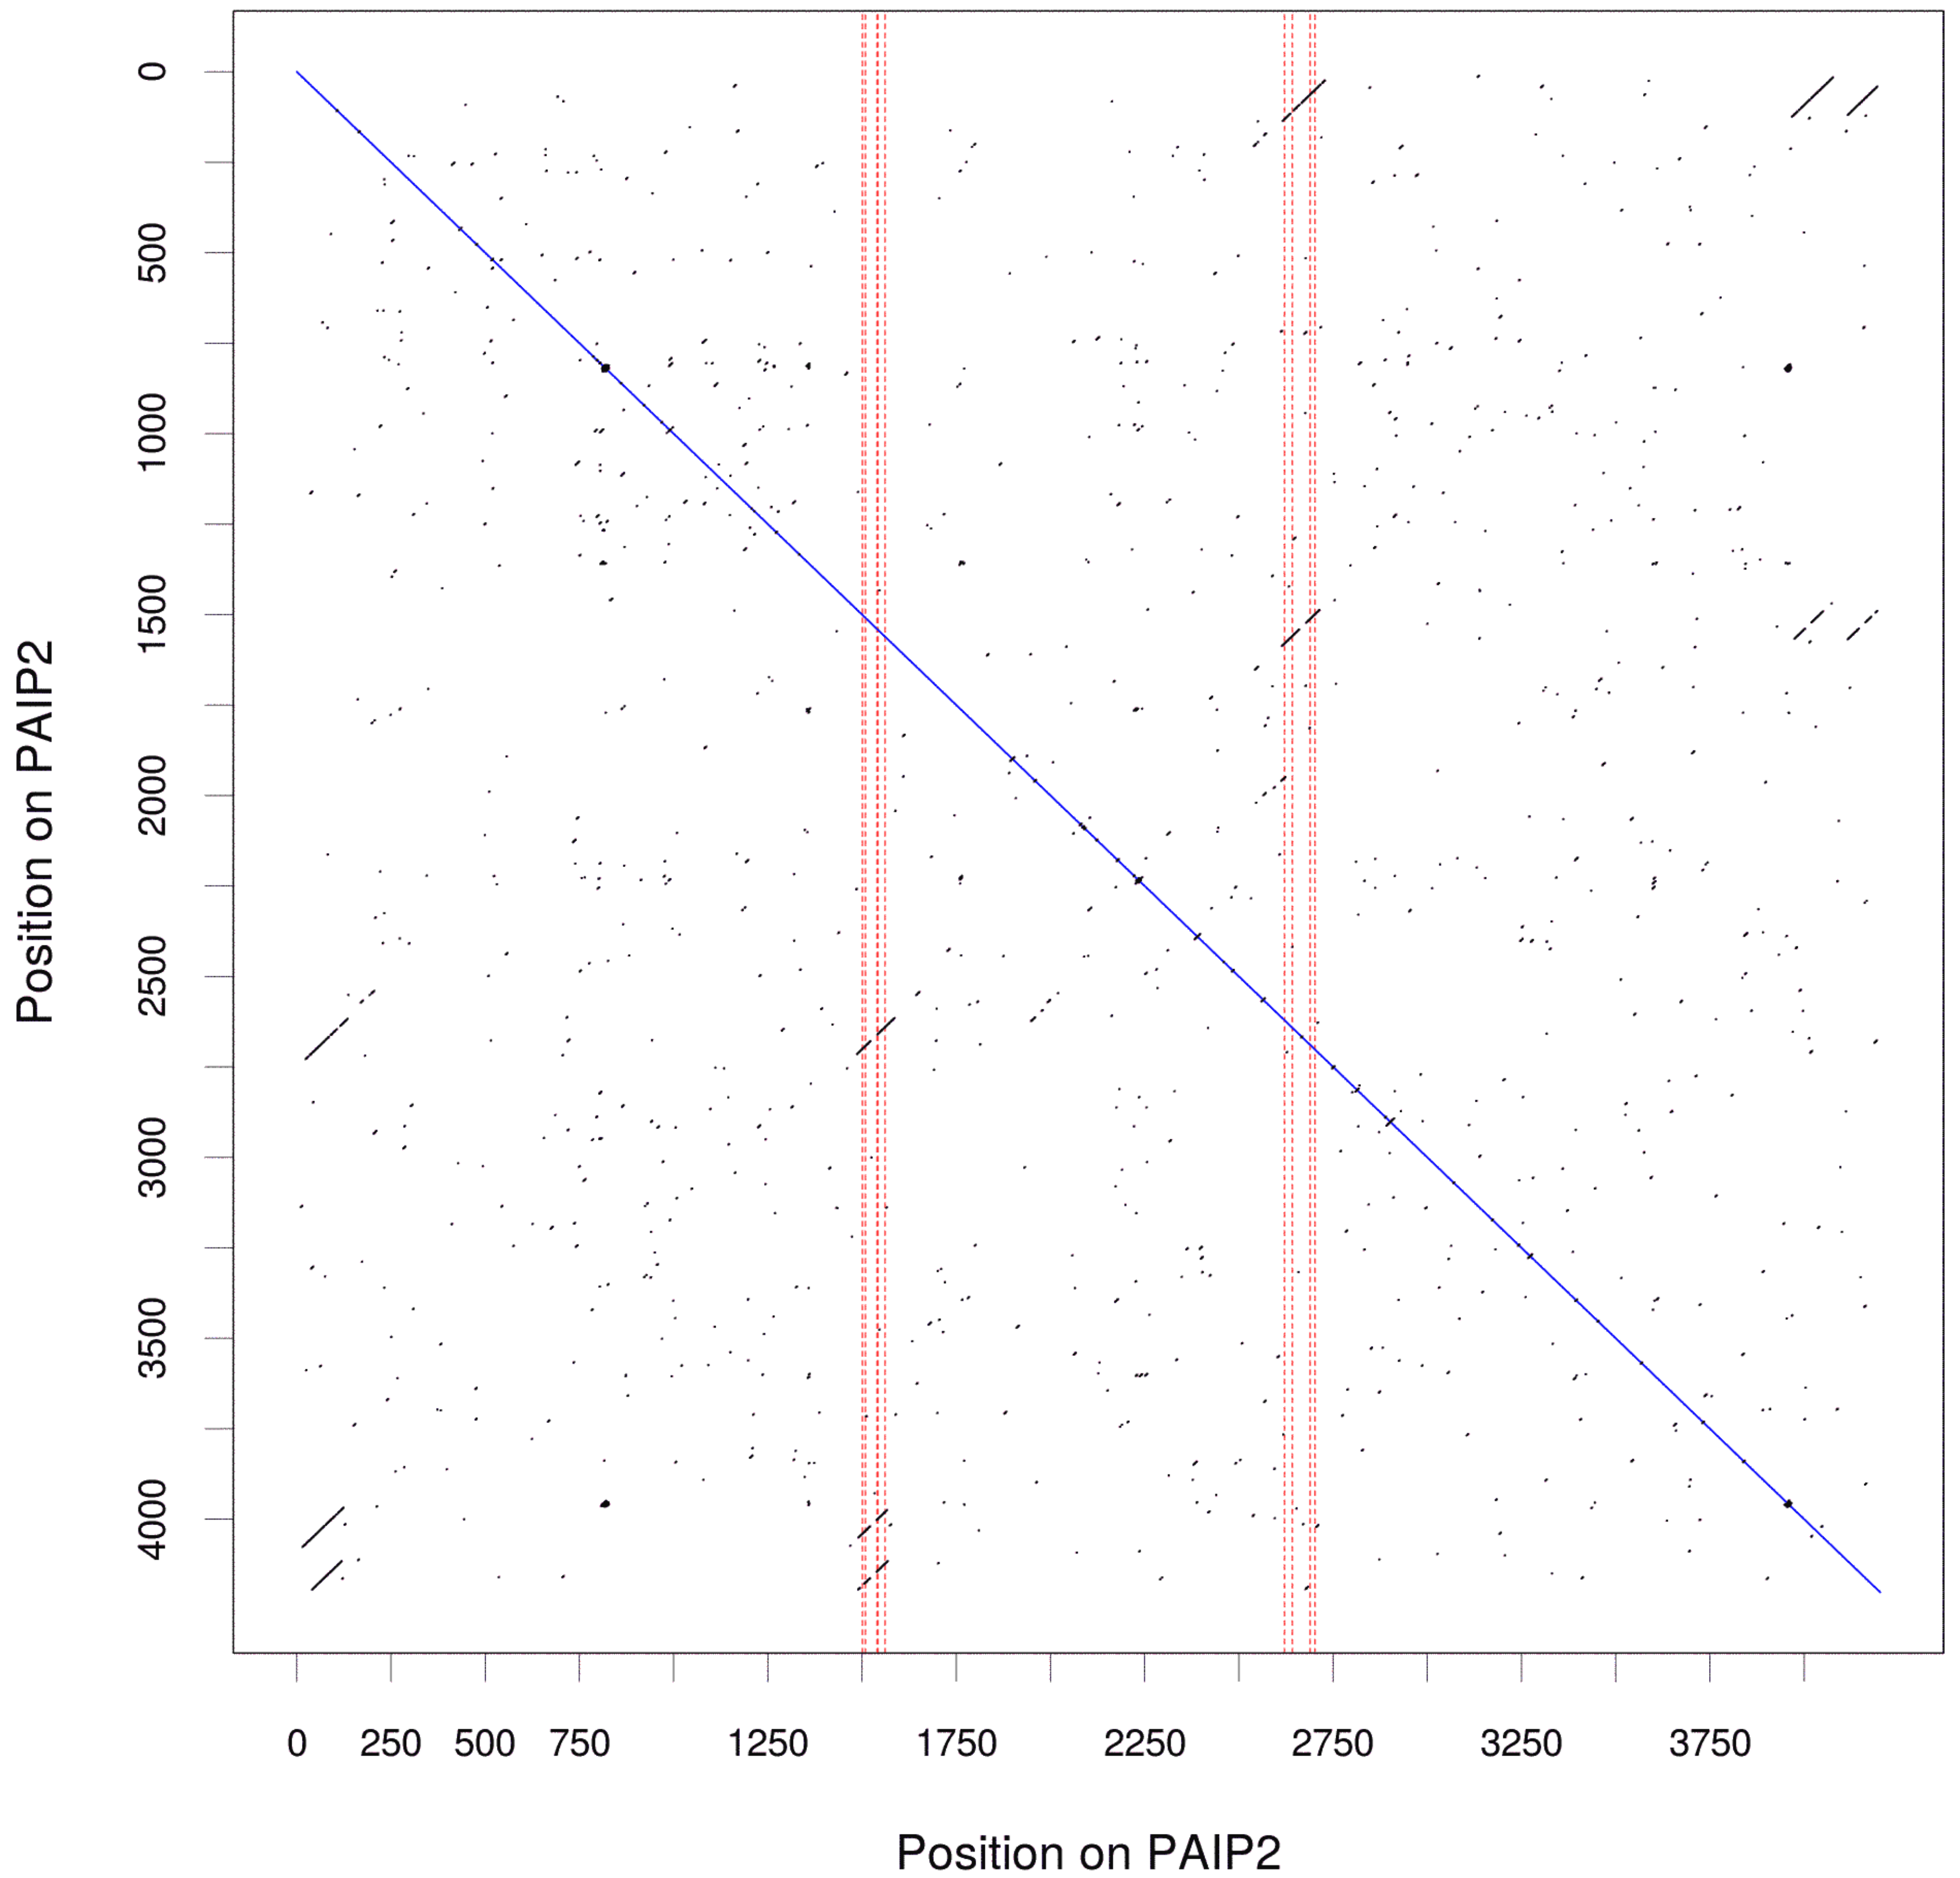

# PANK2

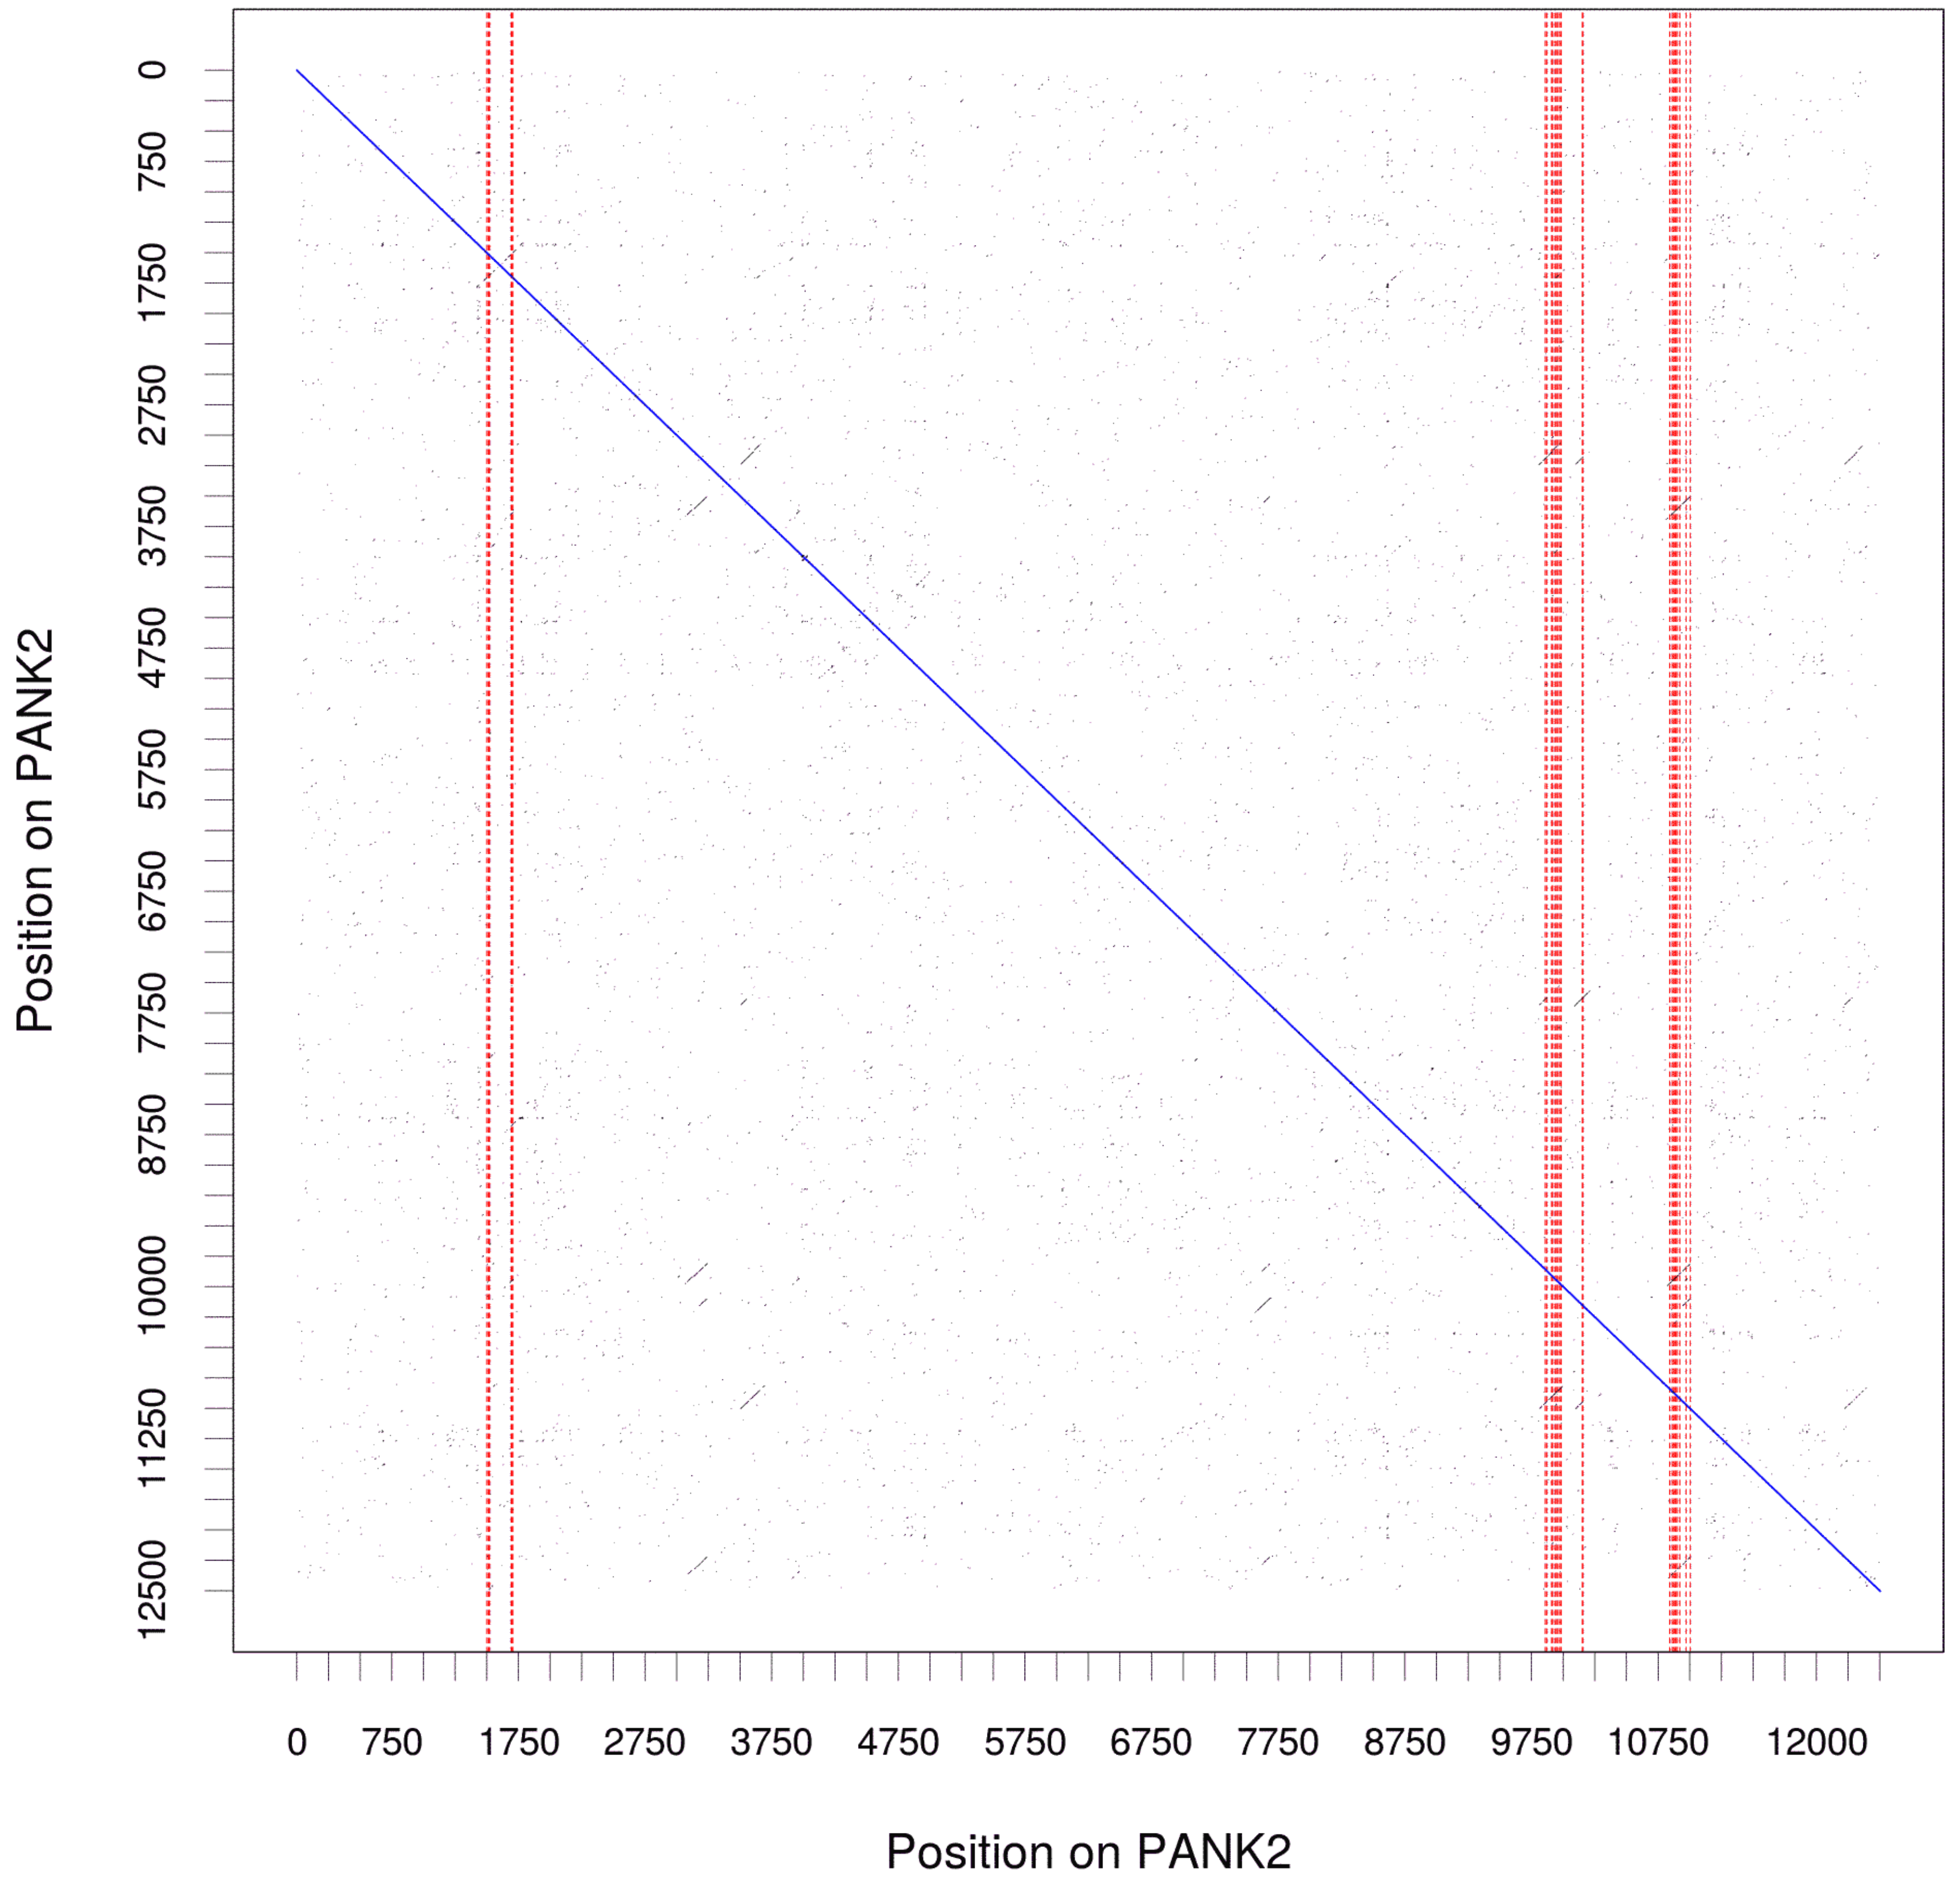

# PAOX

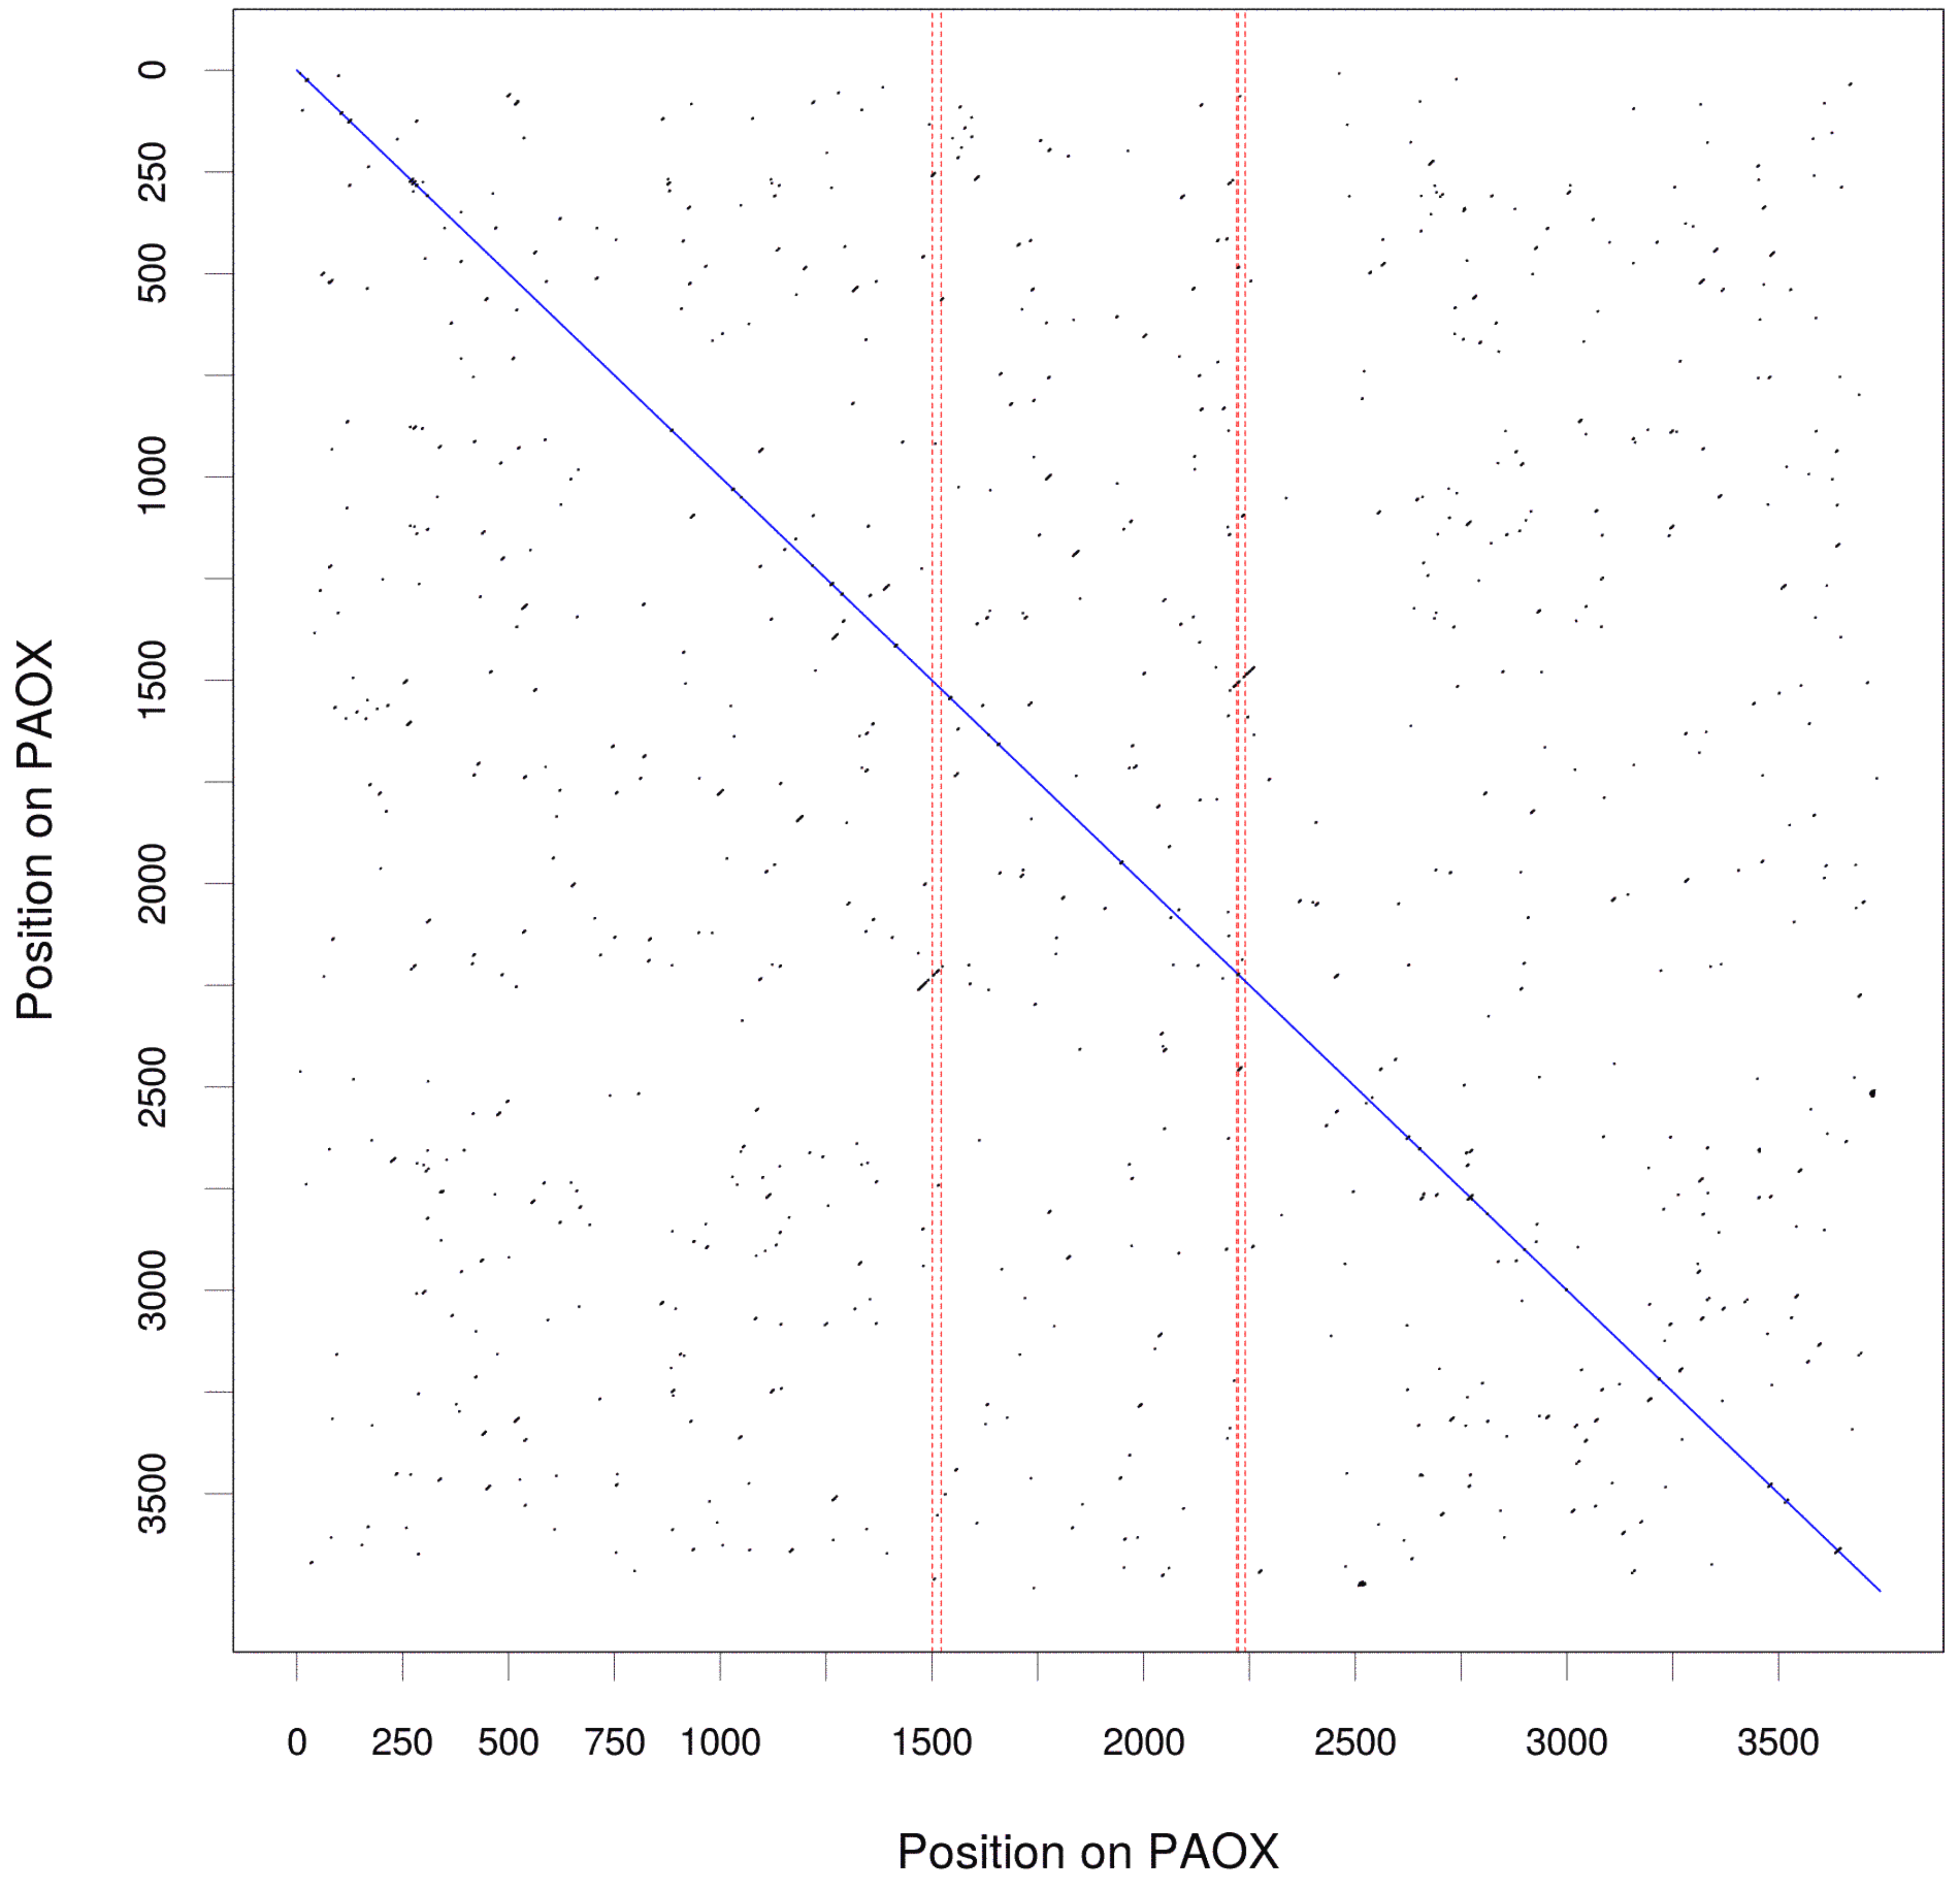

# PAPOLA

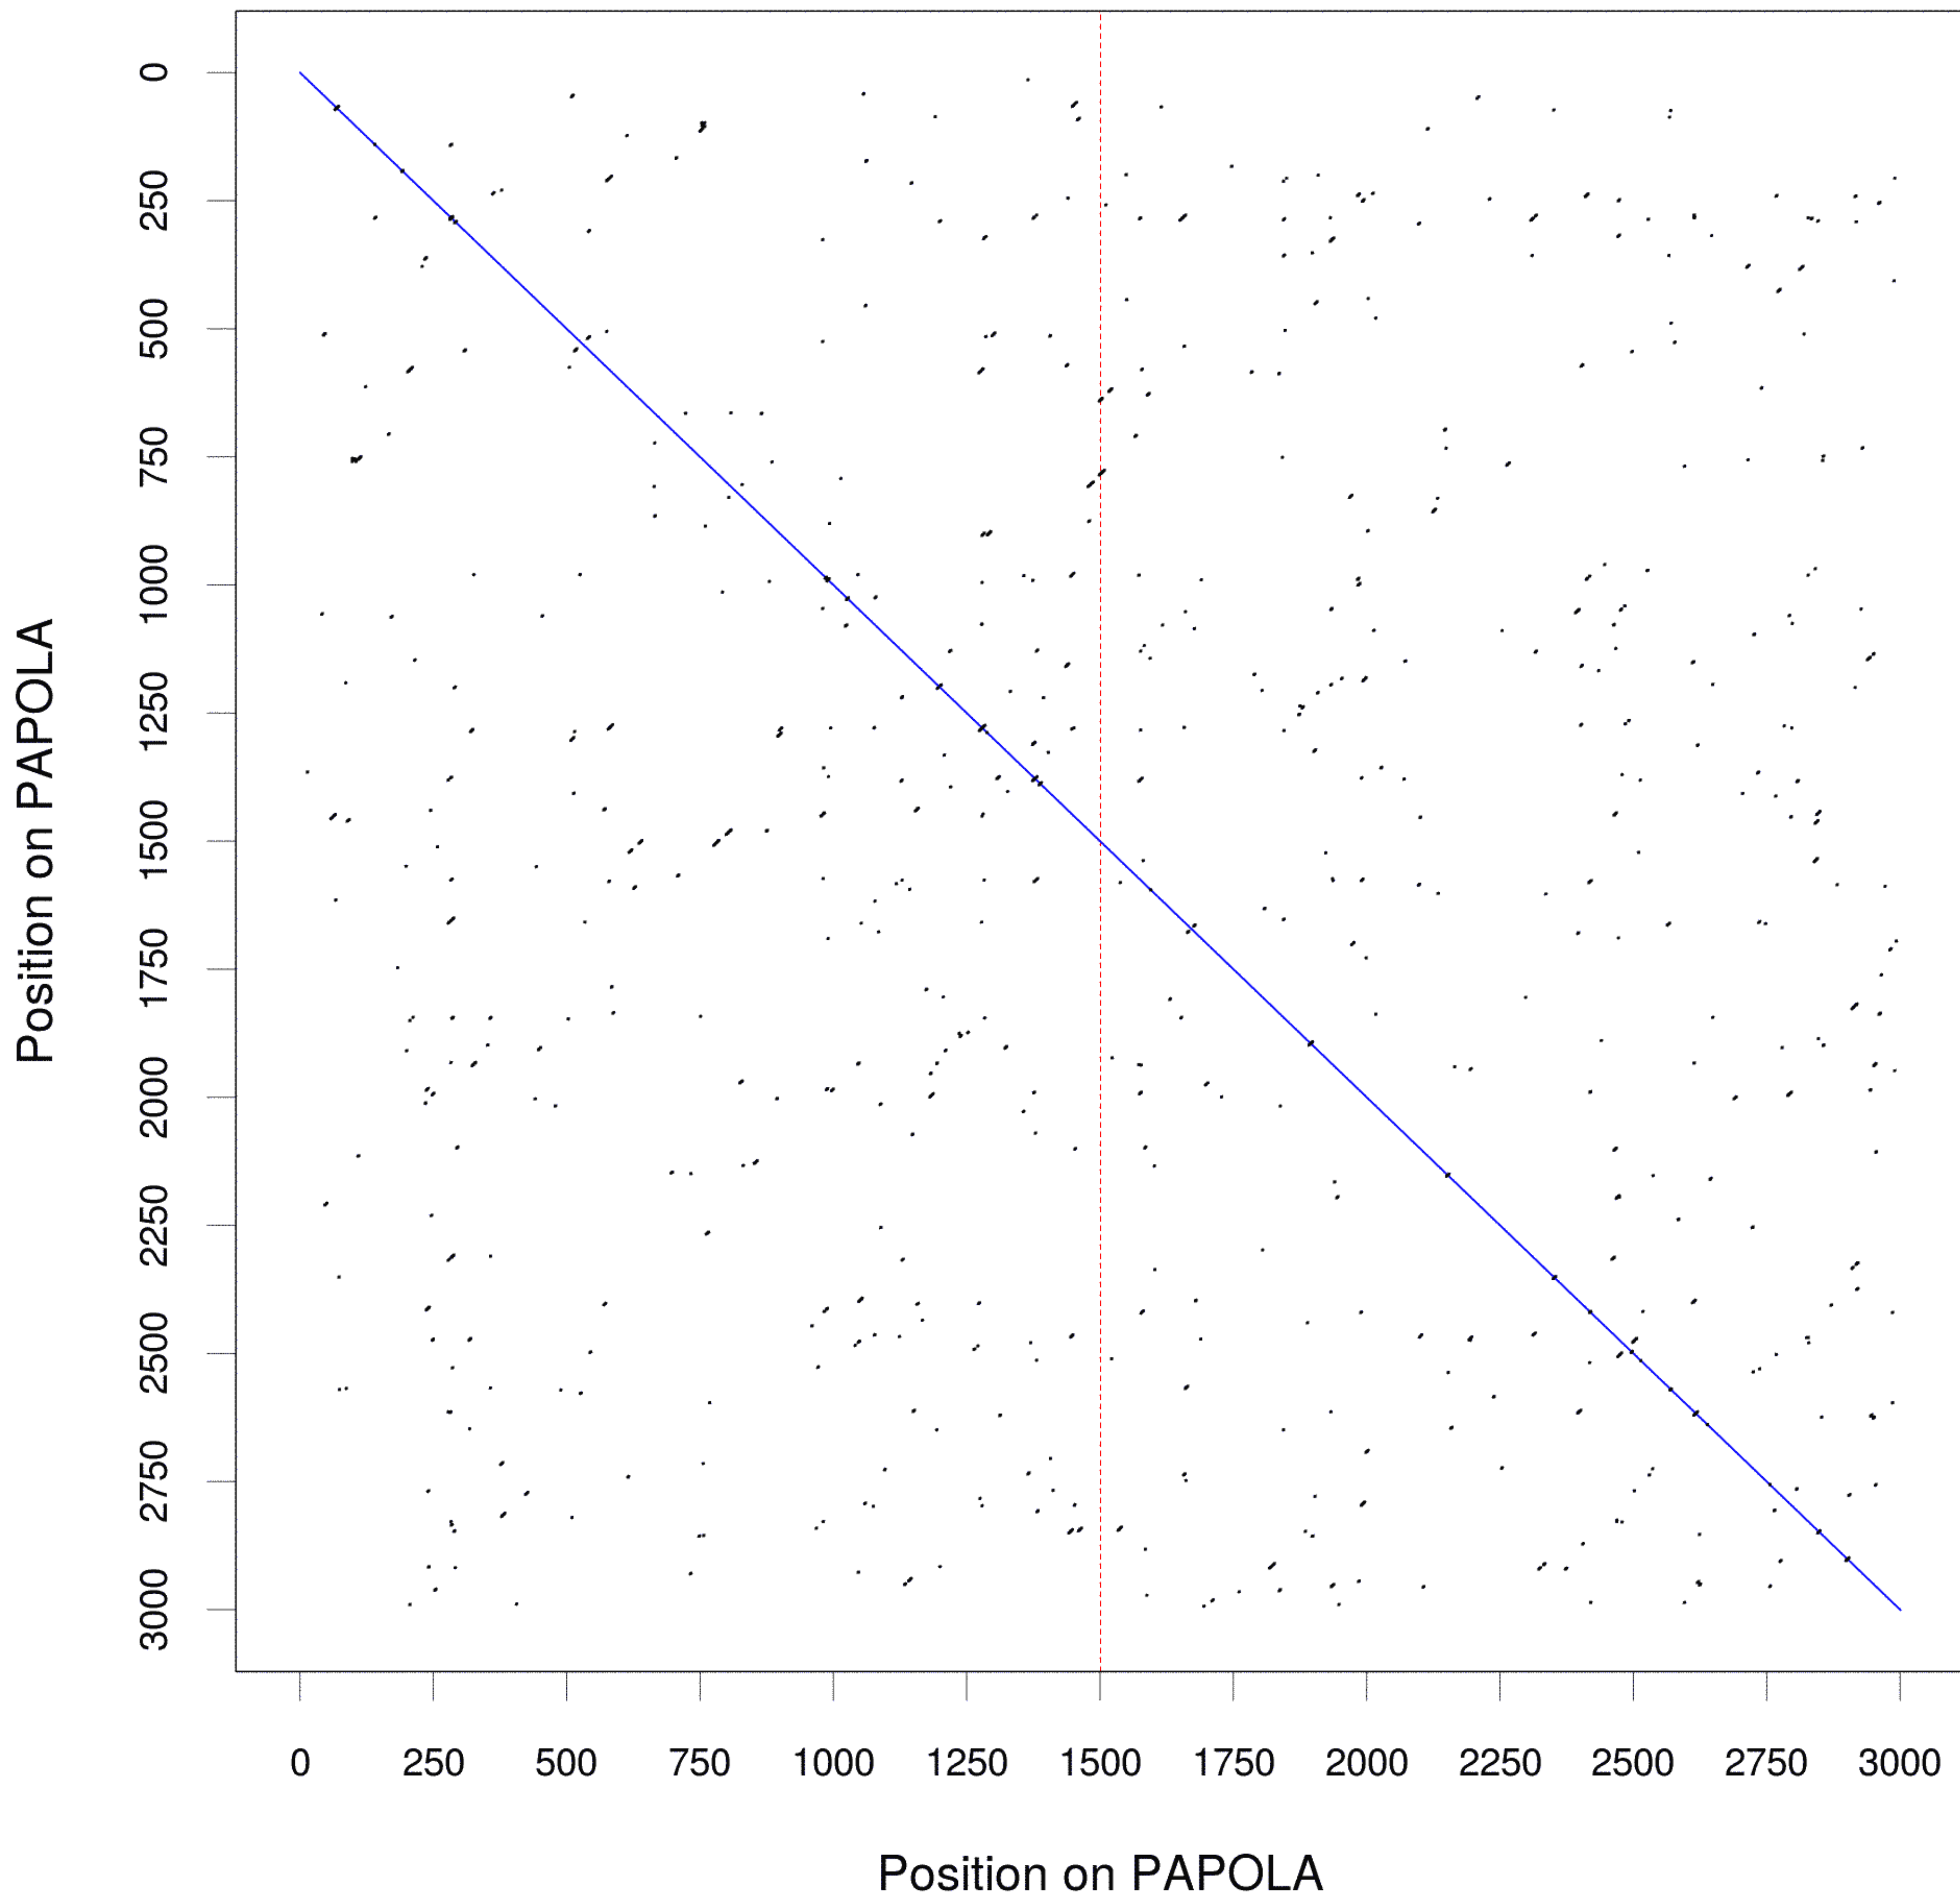

# PCSK7

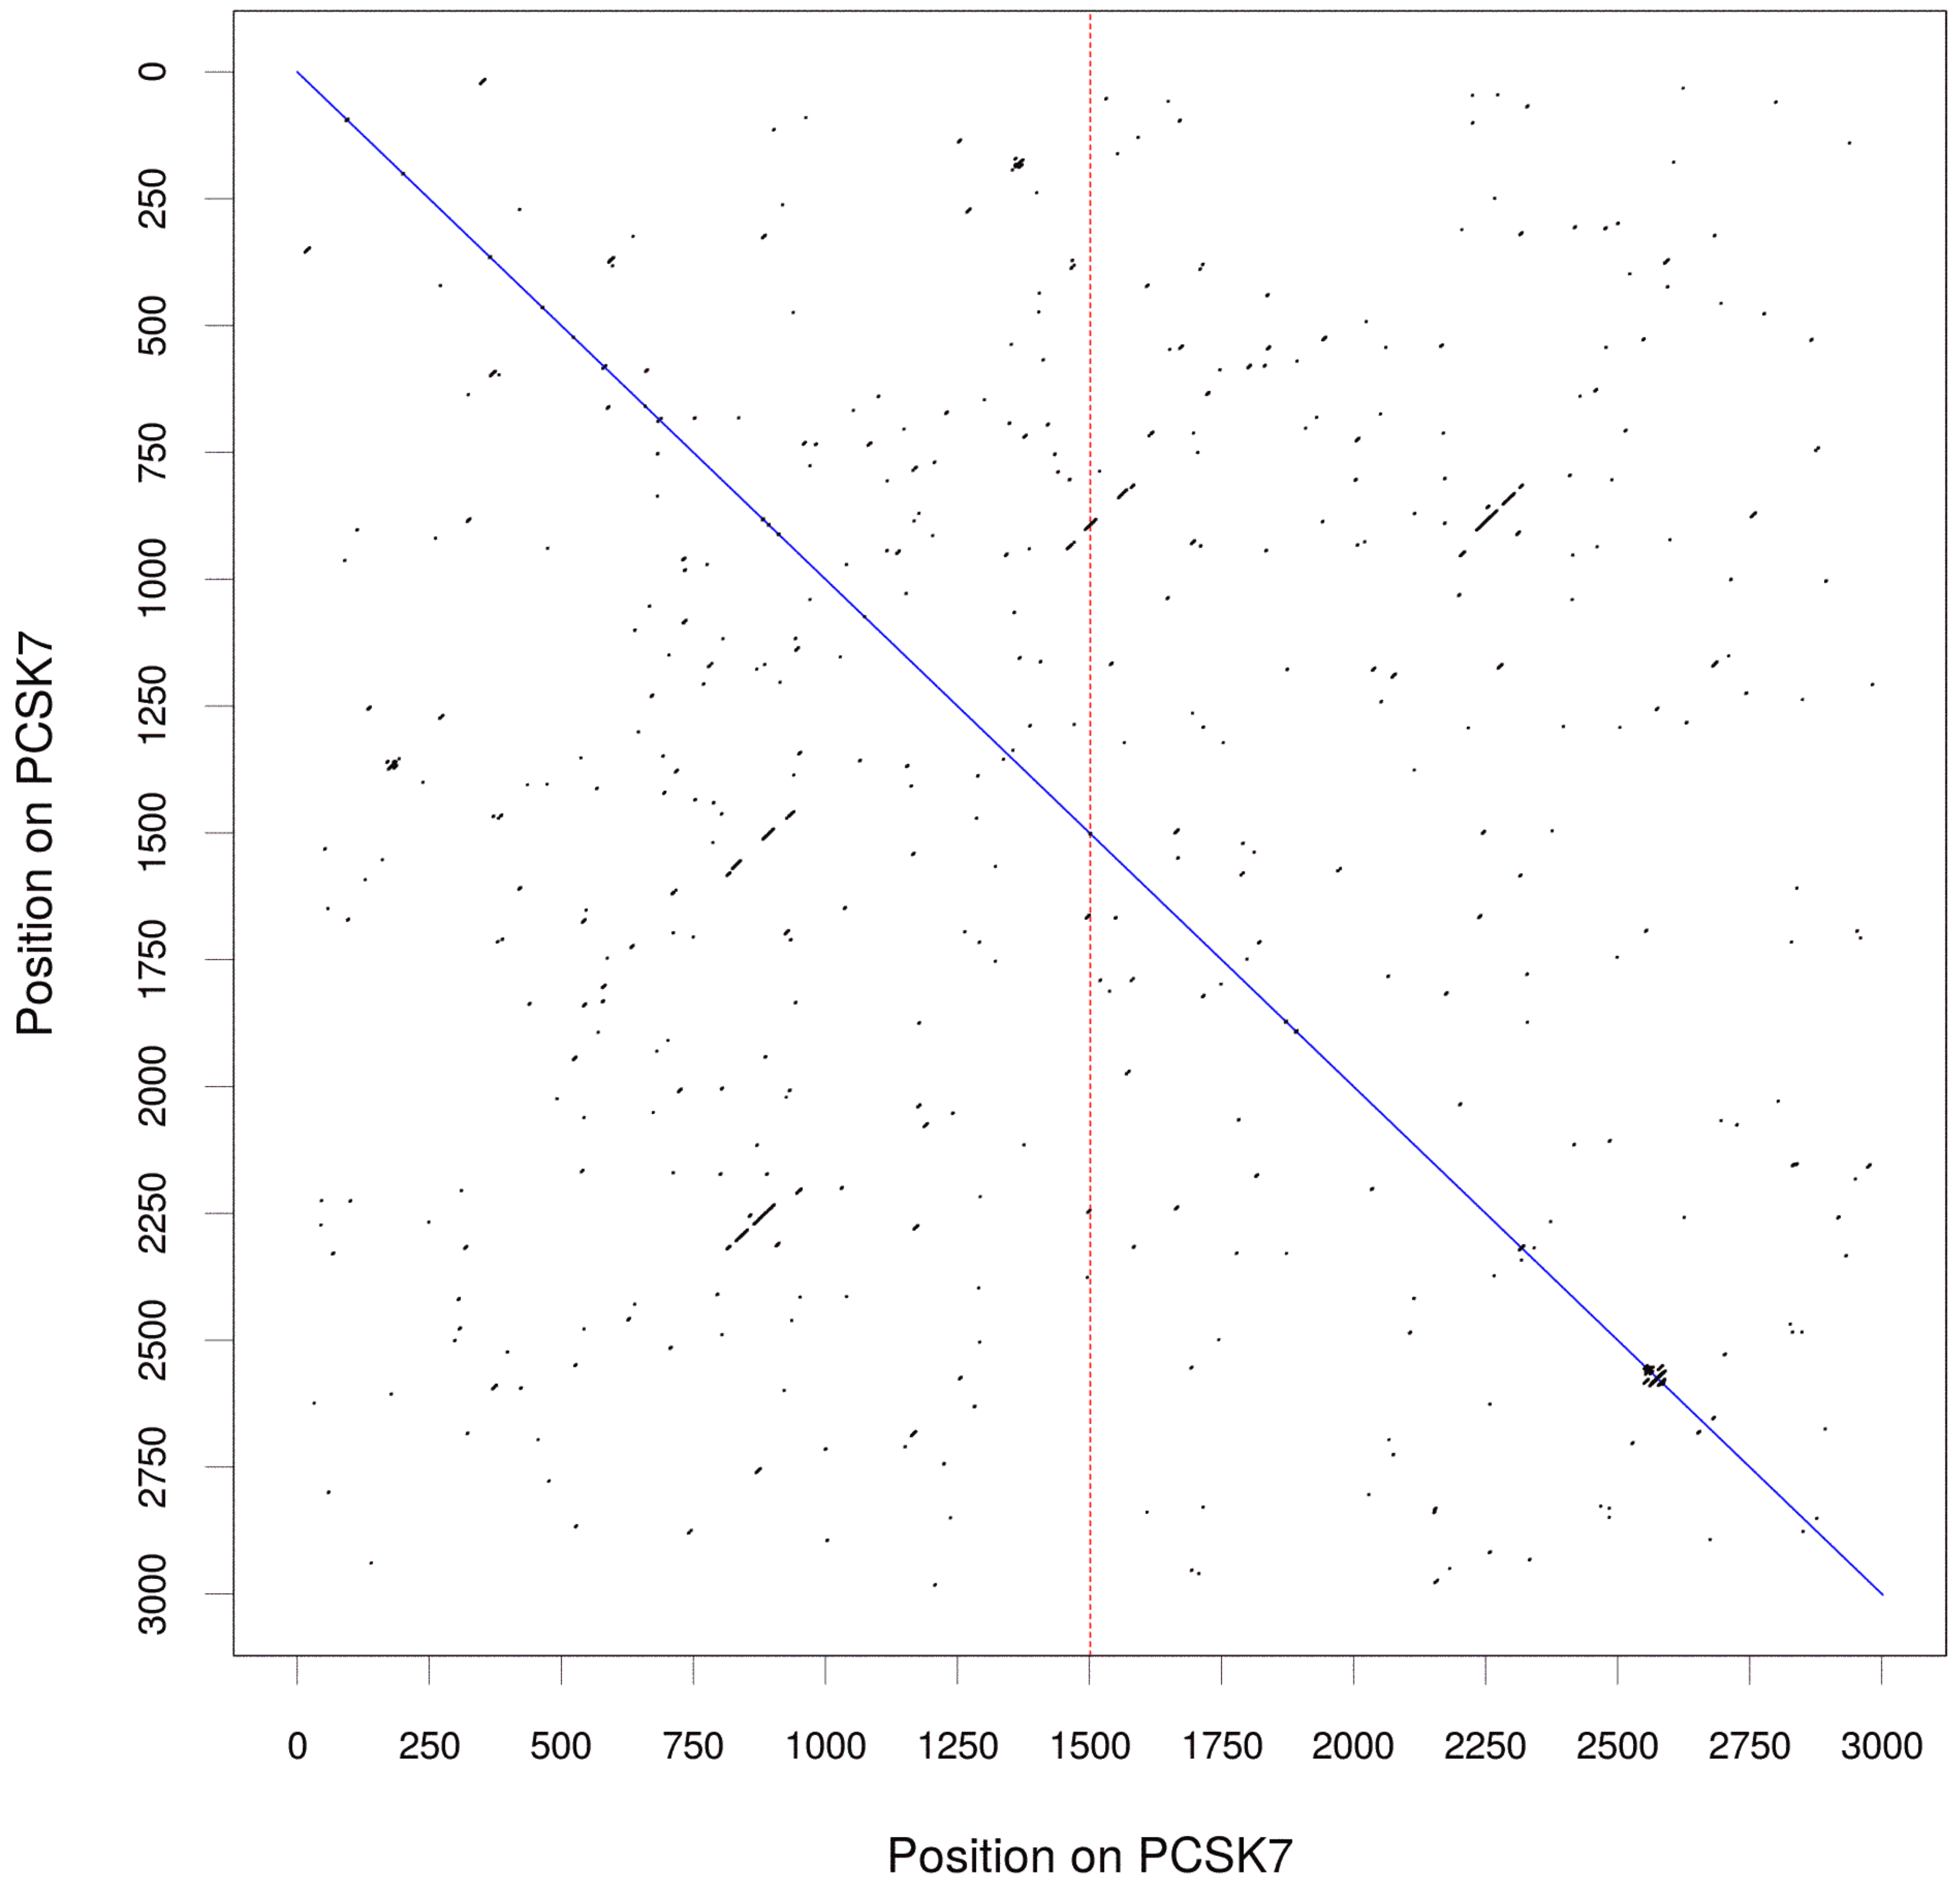

# PDCD4

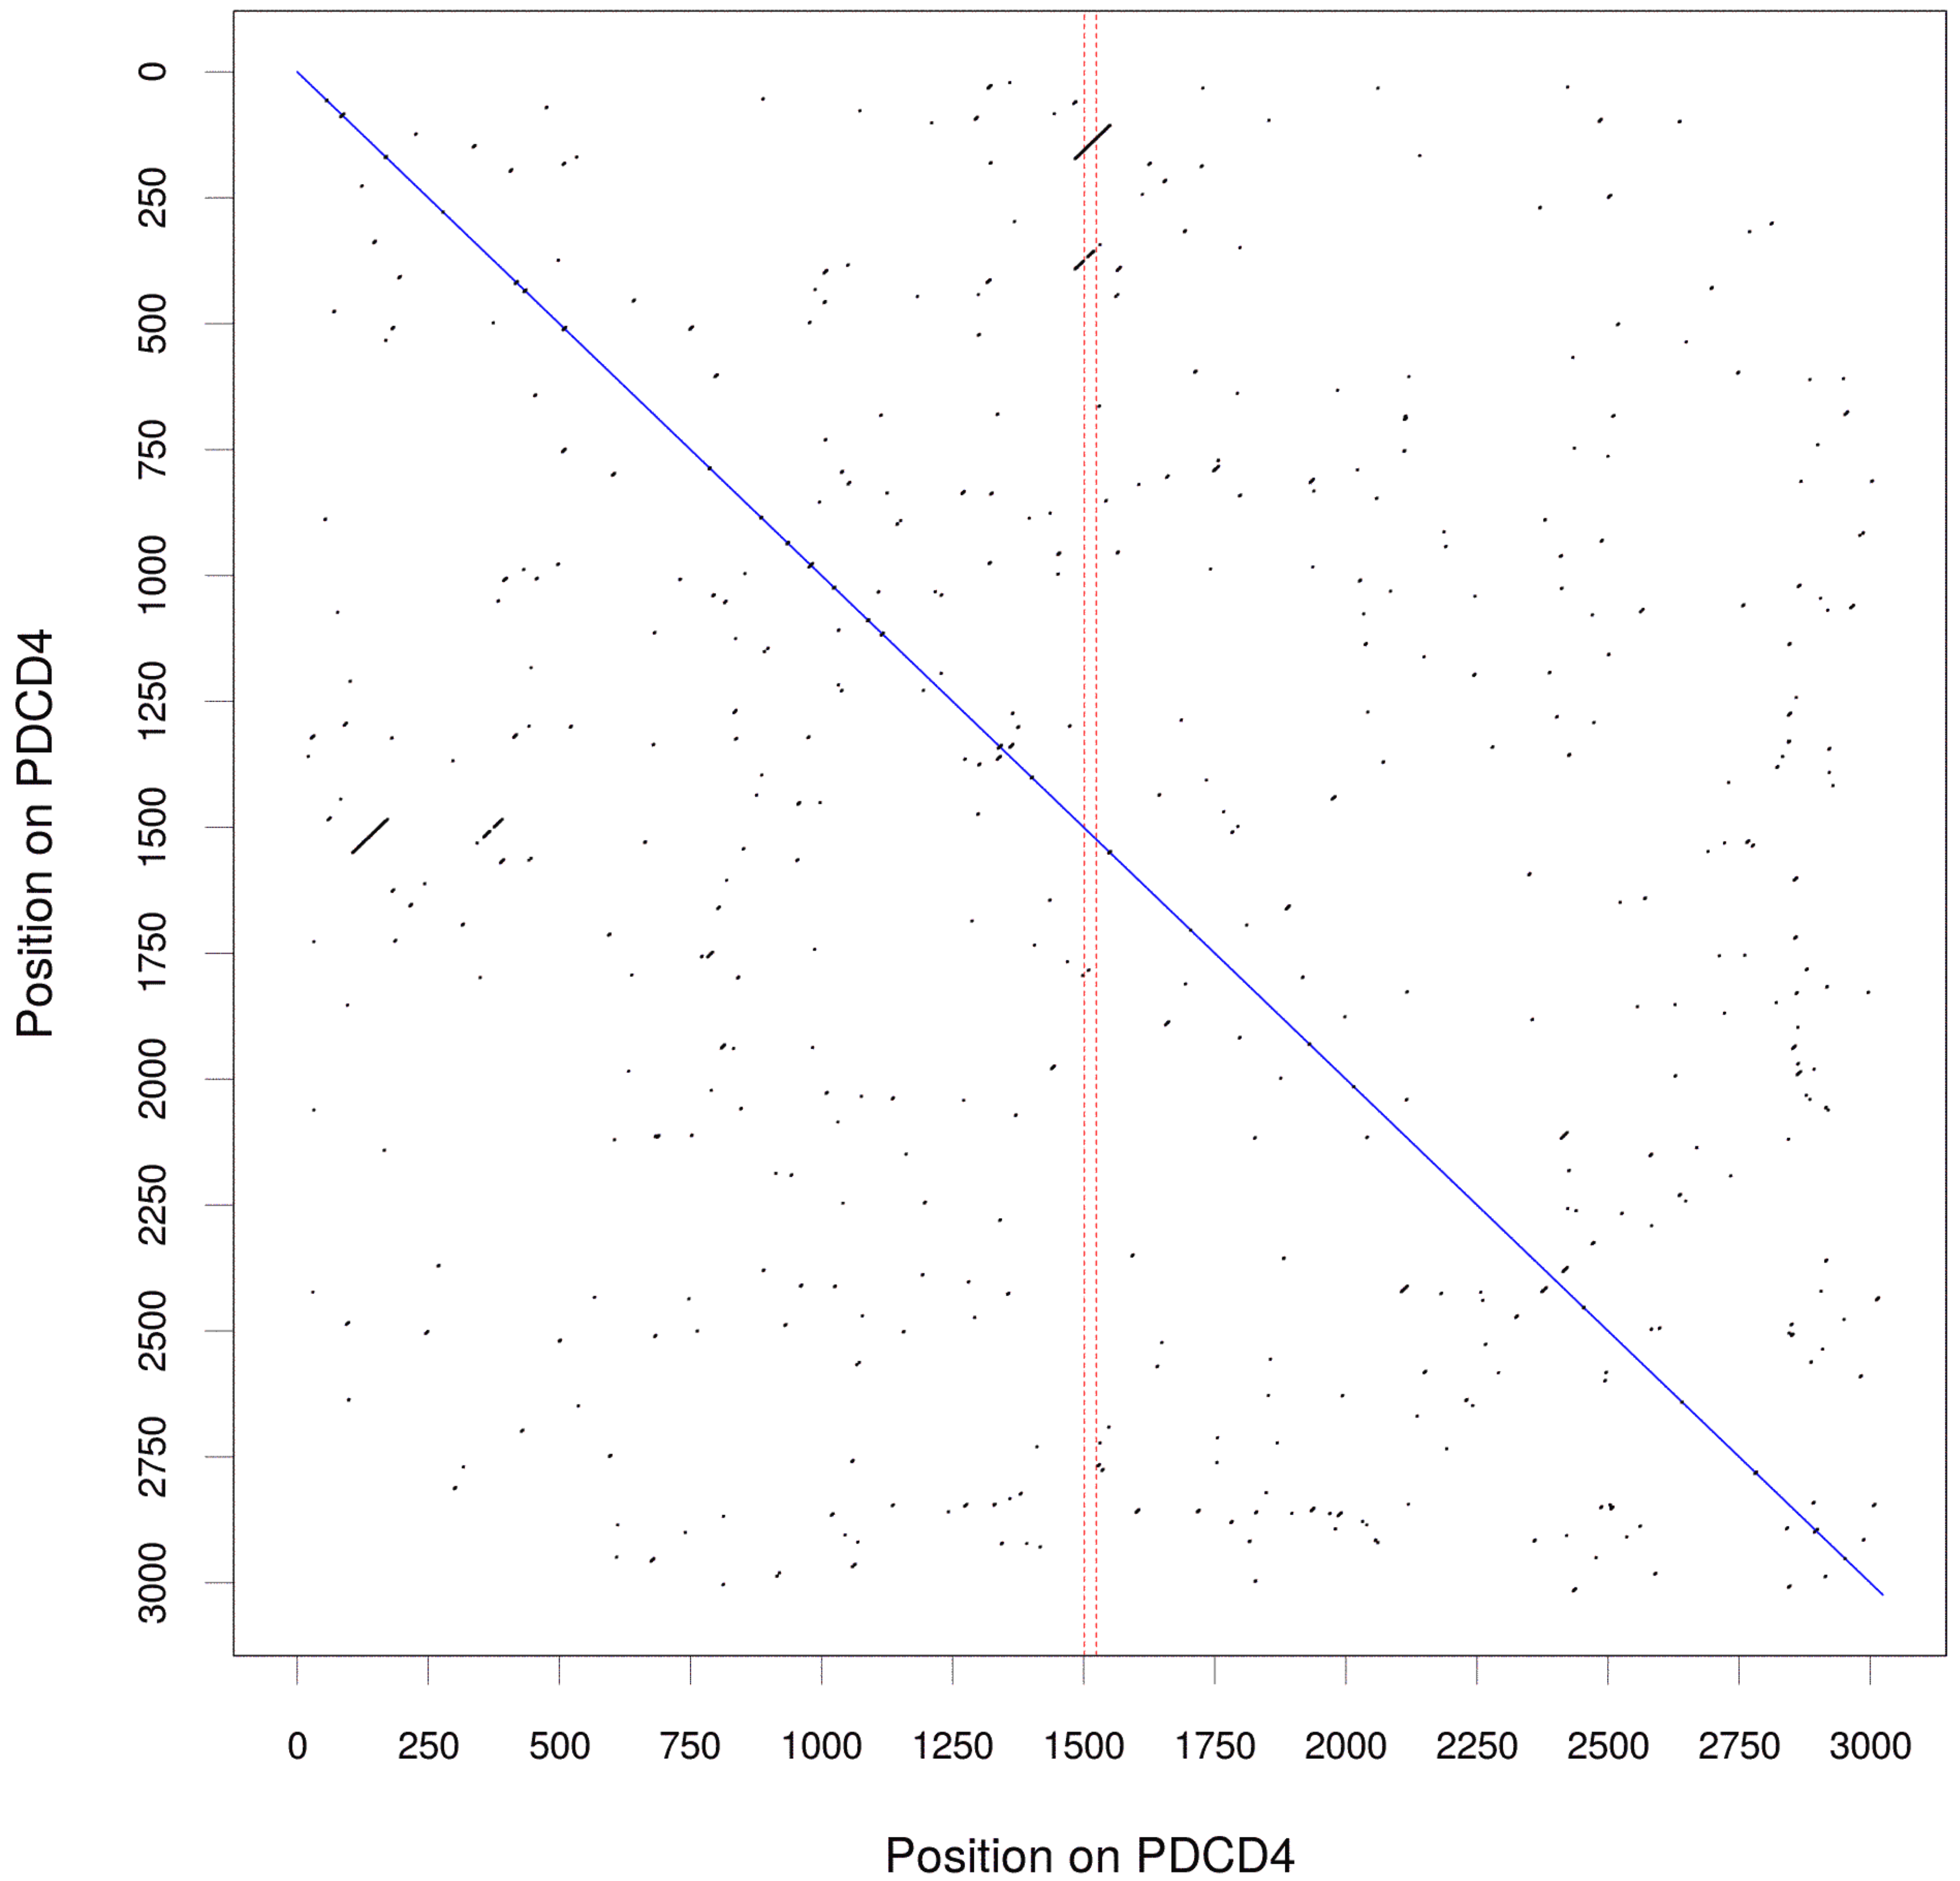

# PDPN

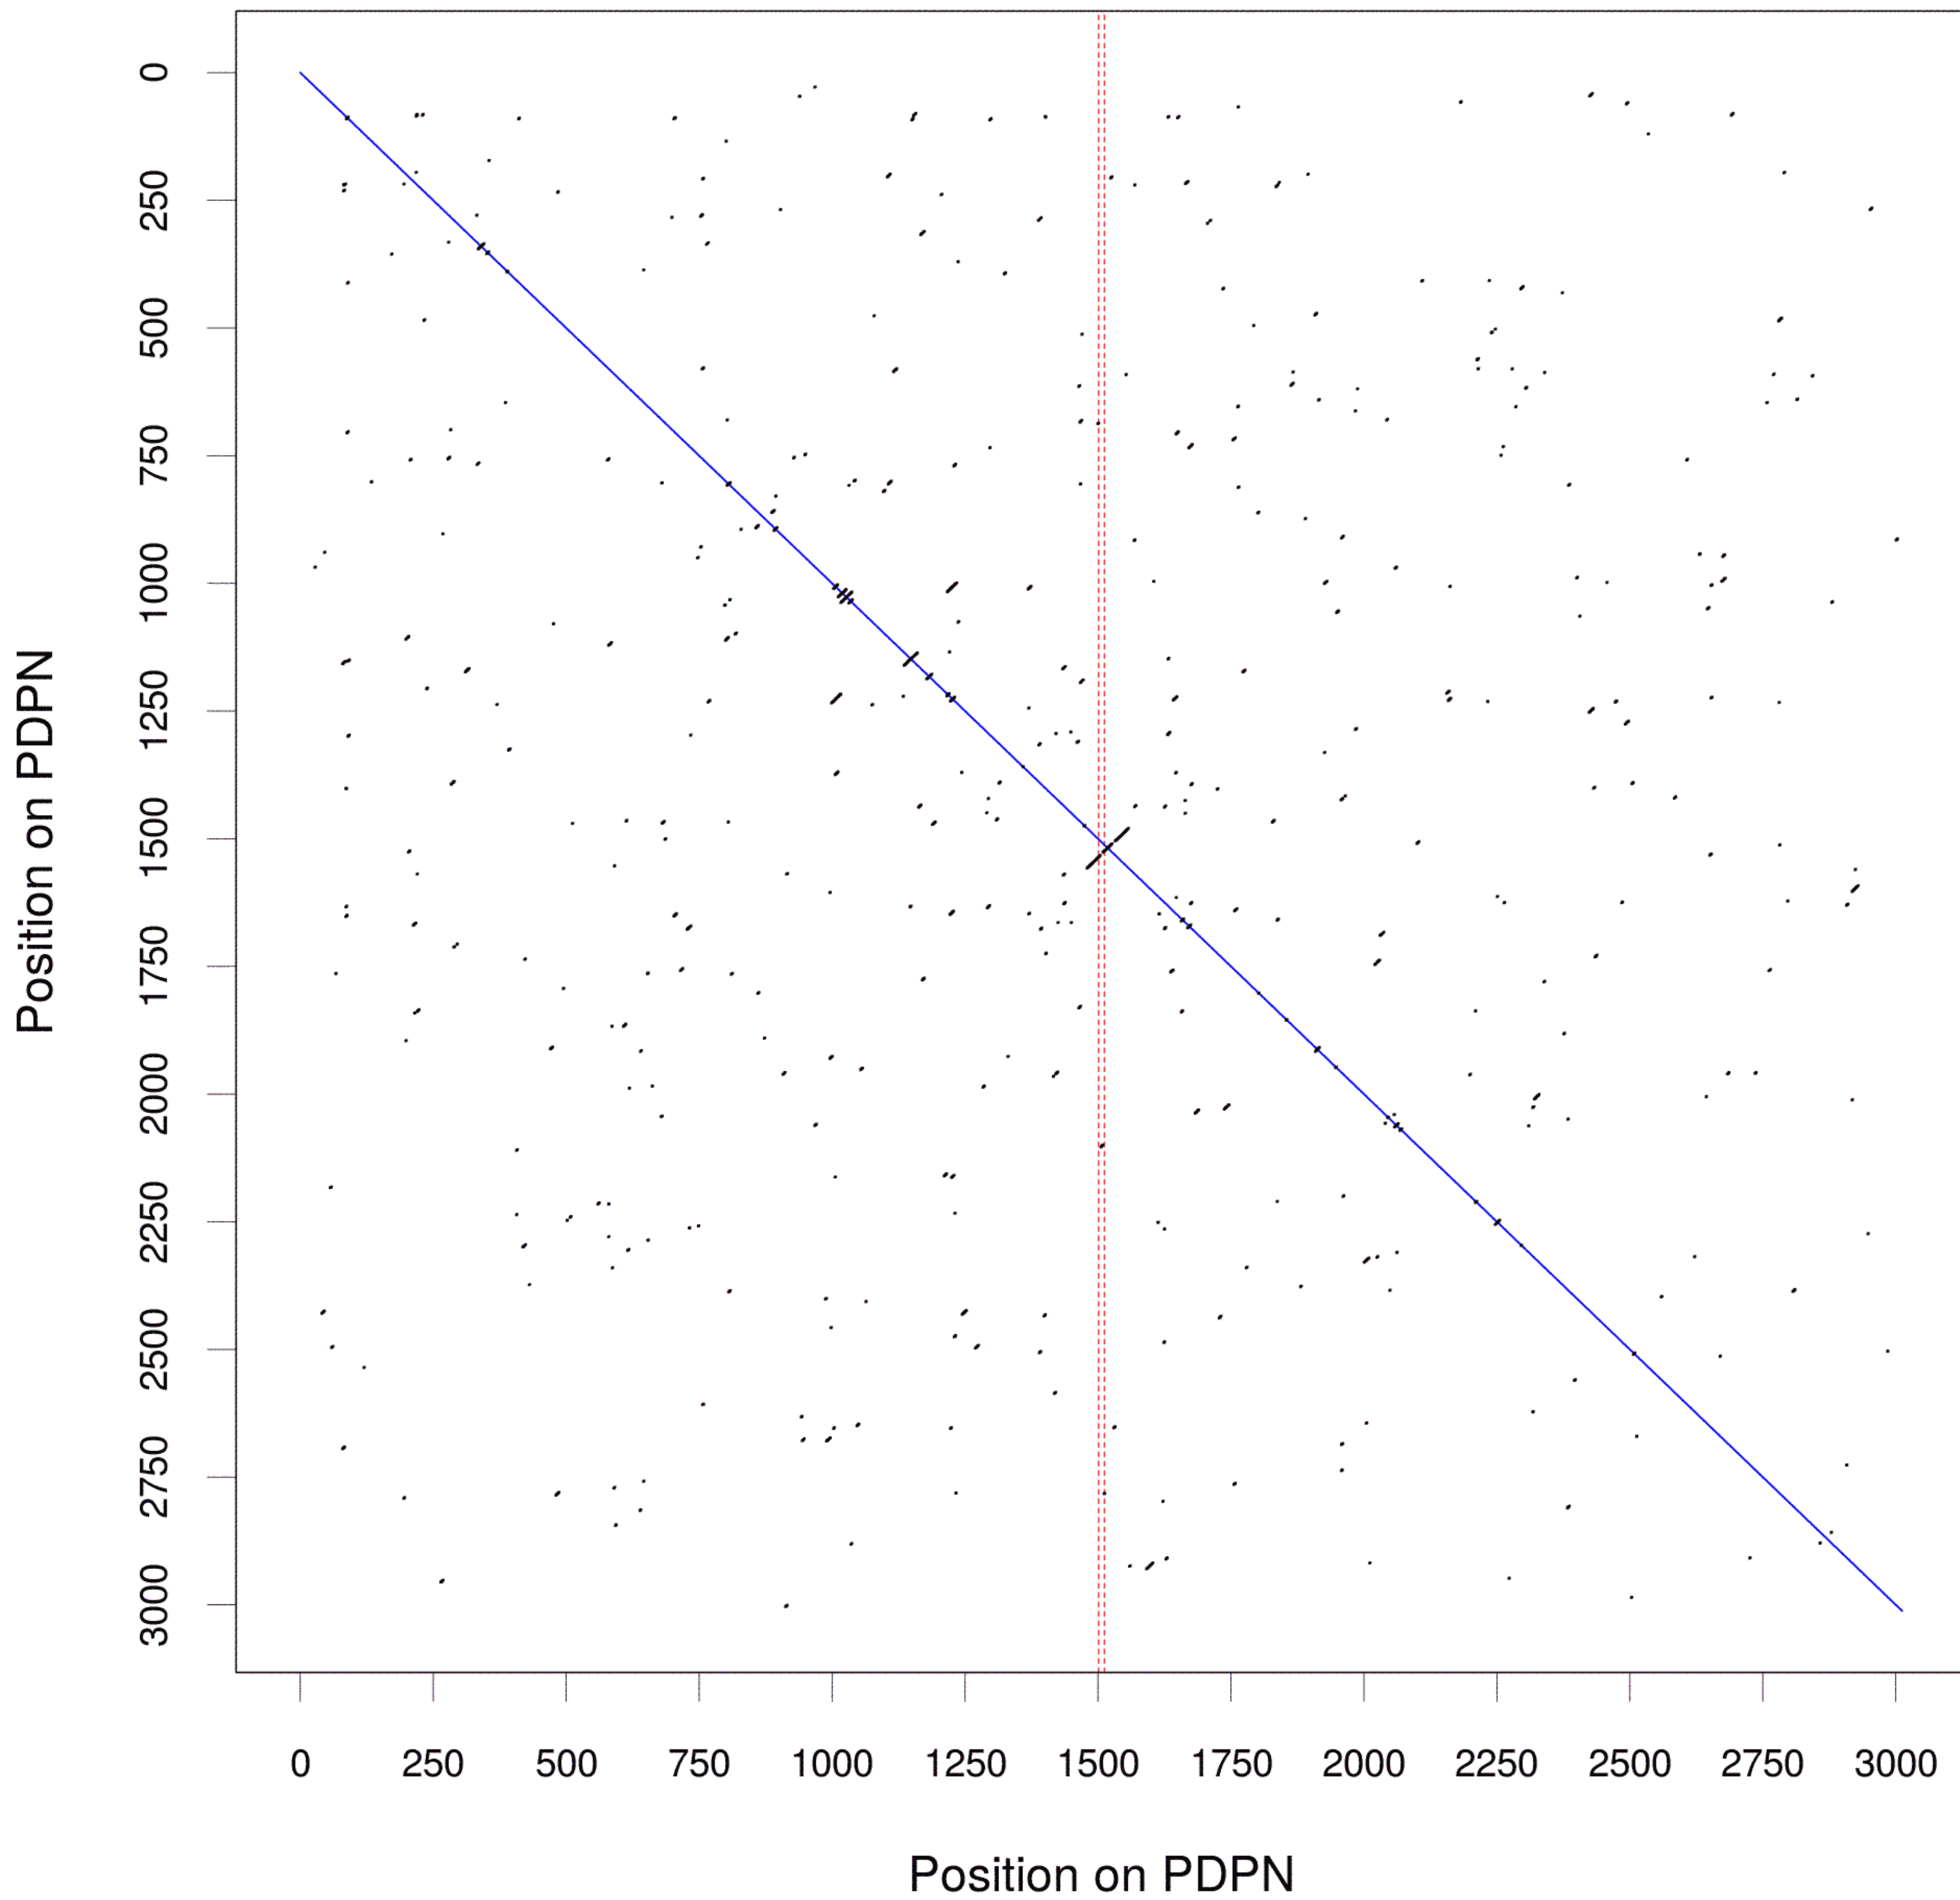

# PEX6

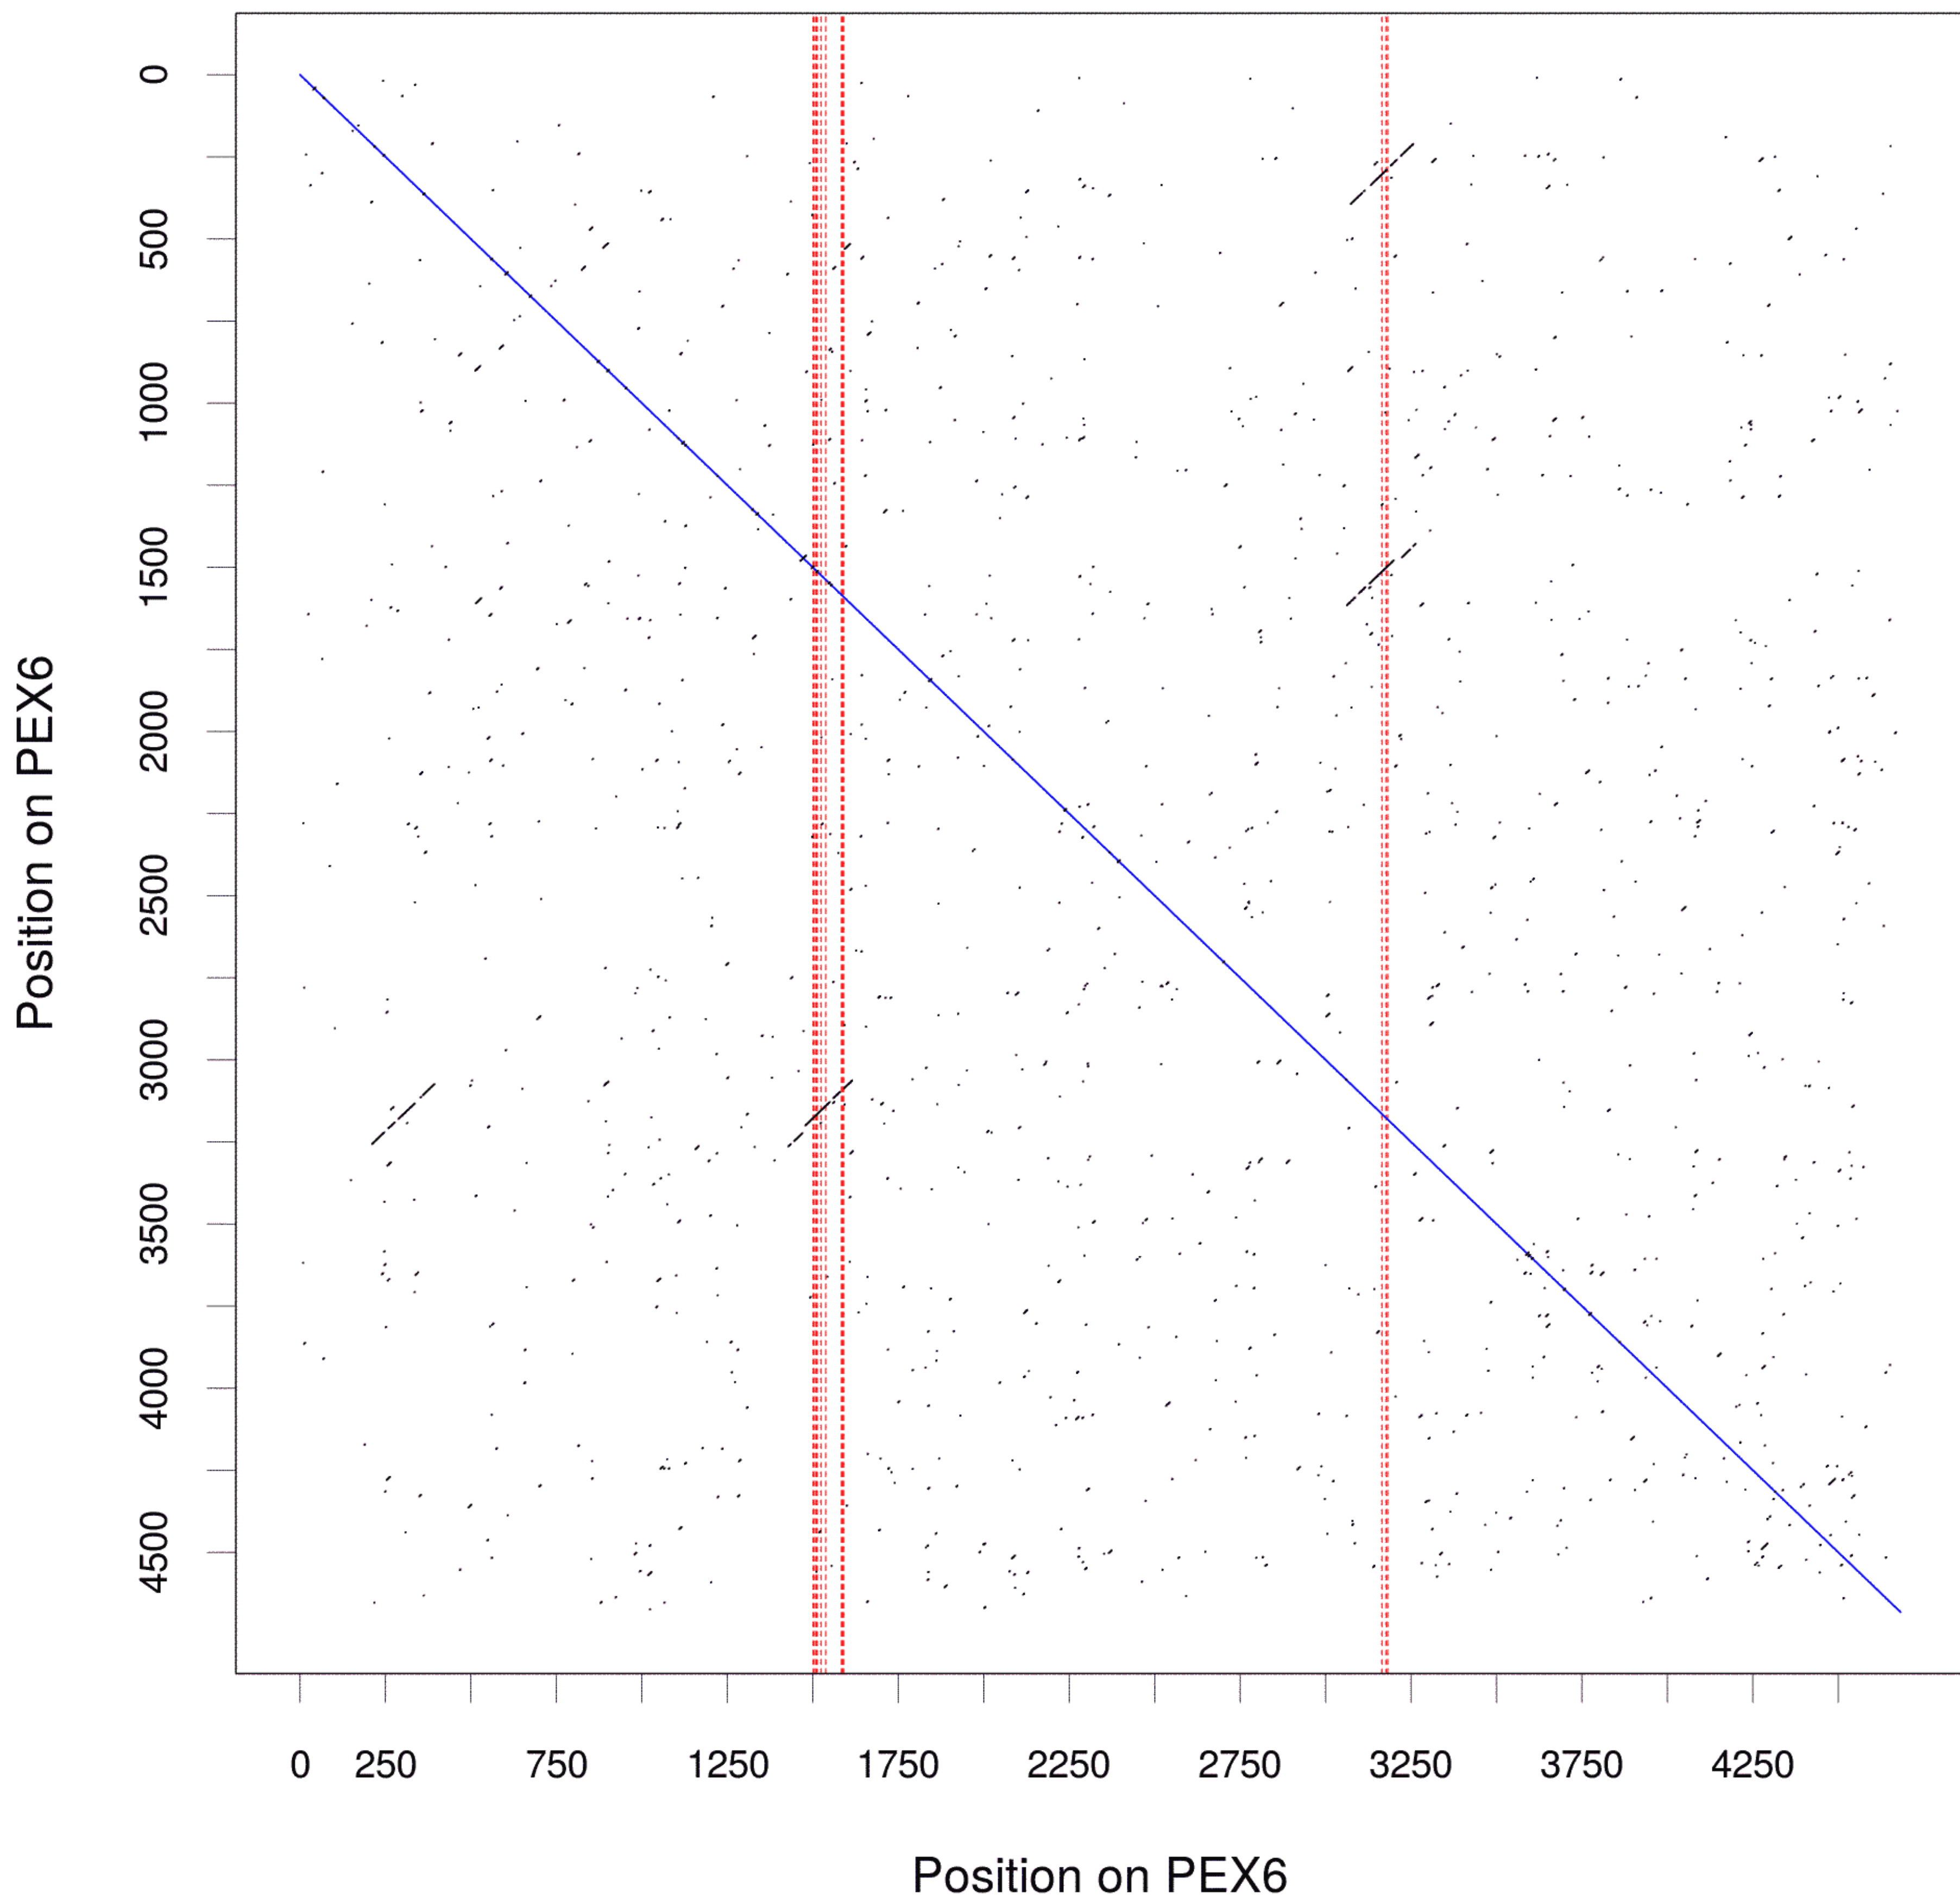



# PEX11G

Position on PEX11G

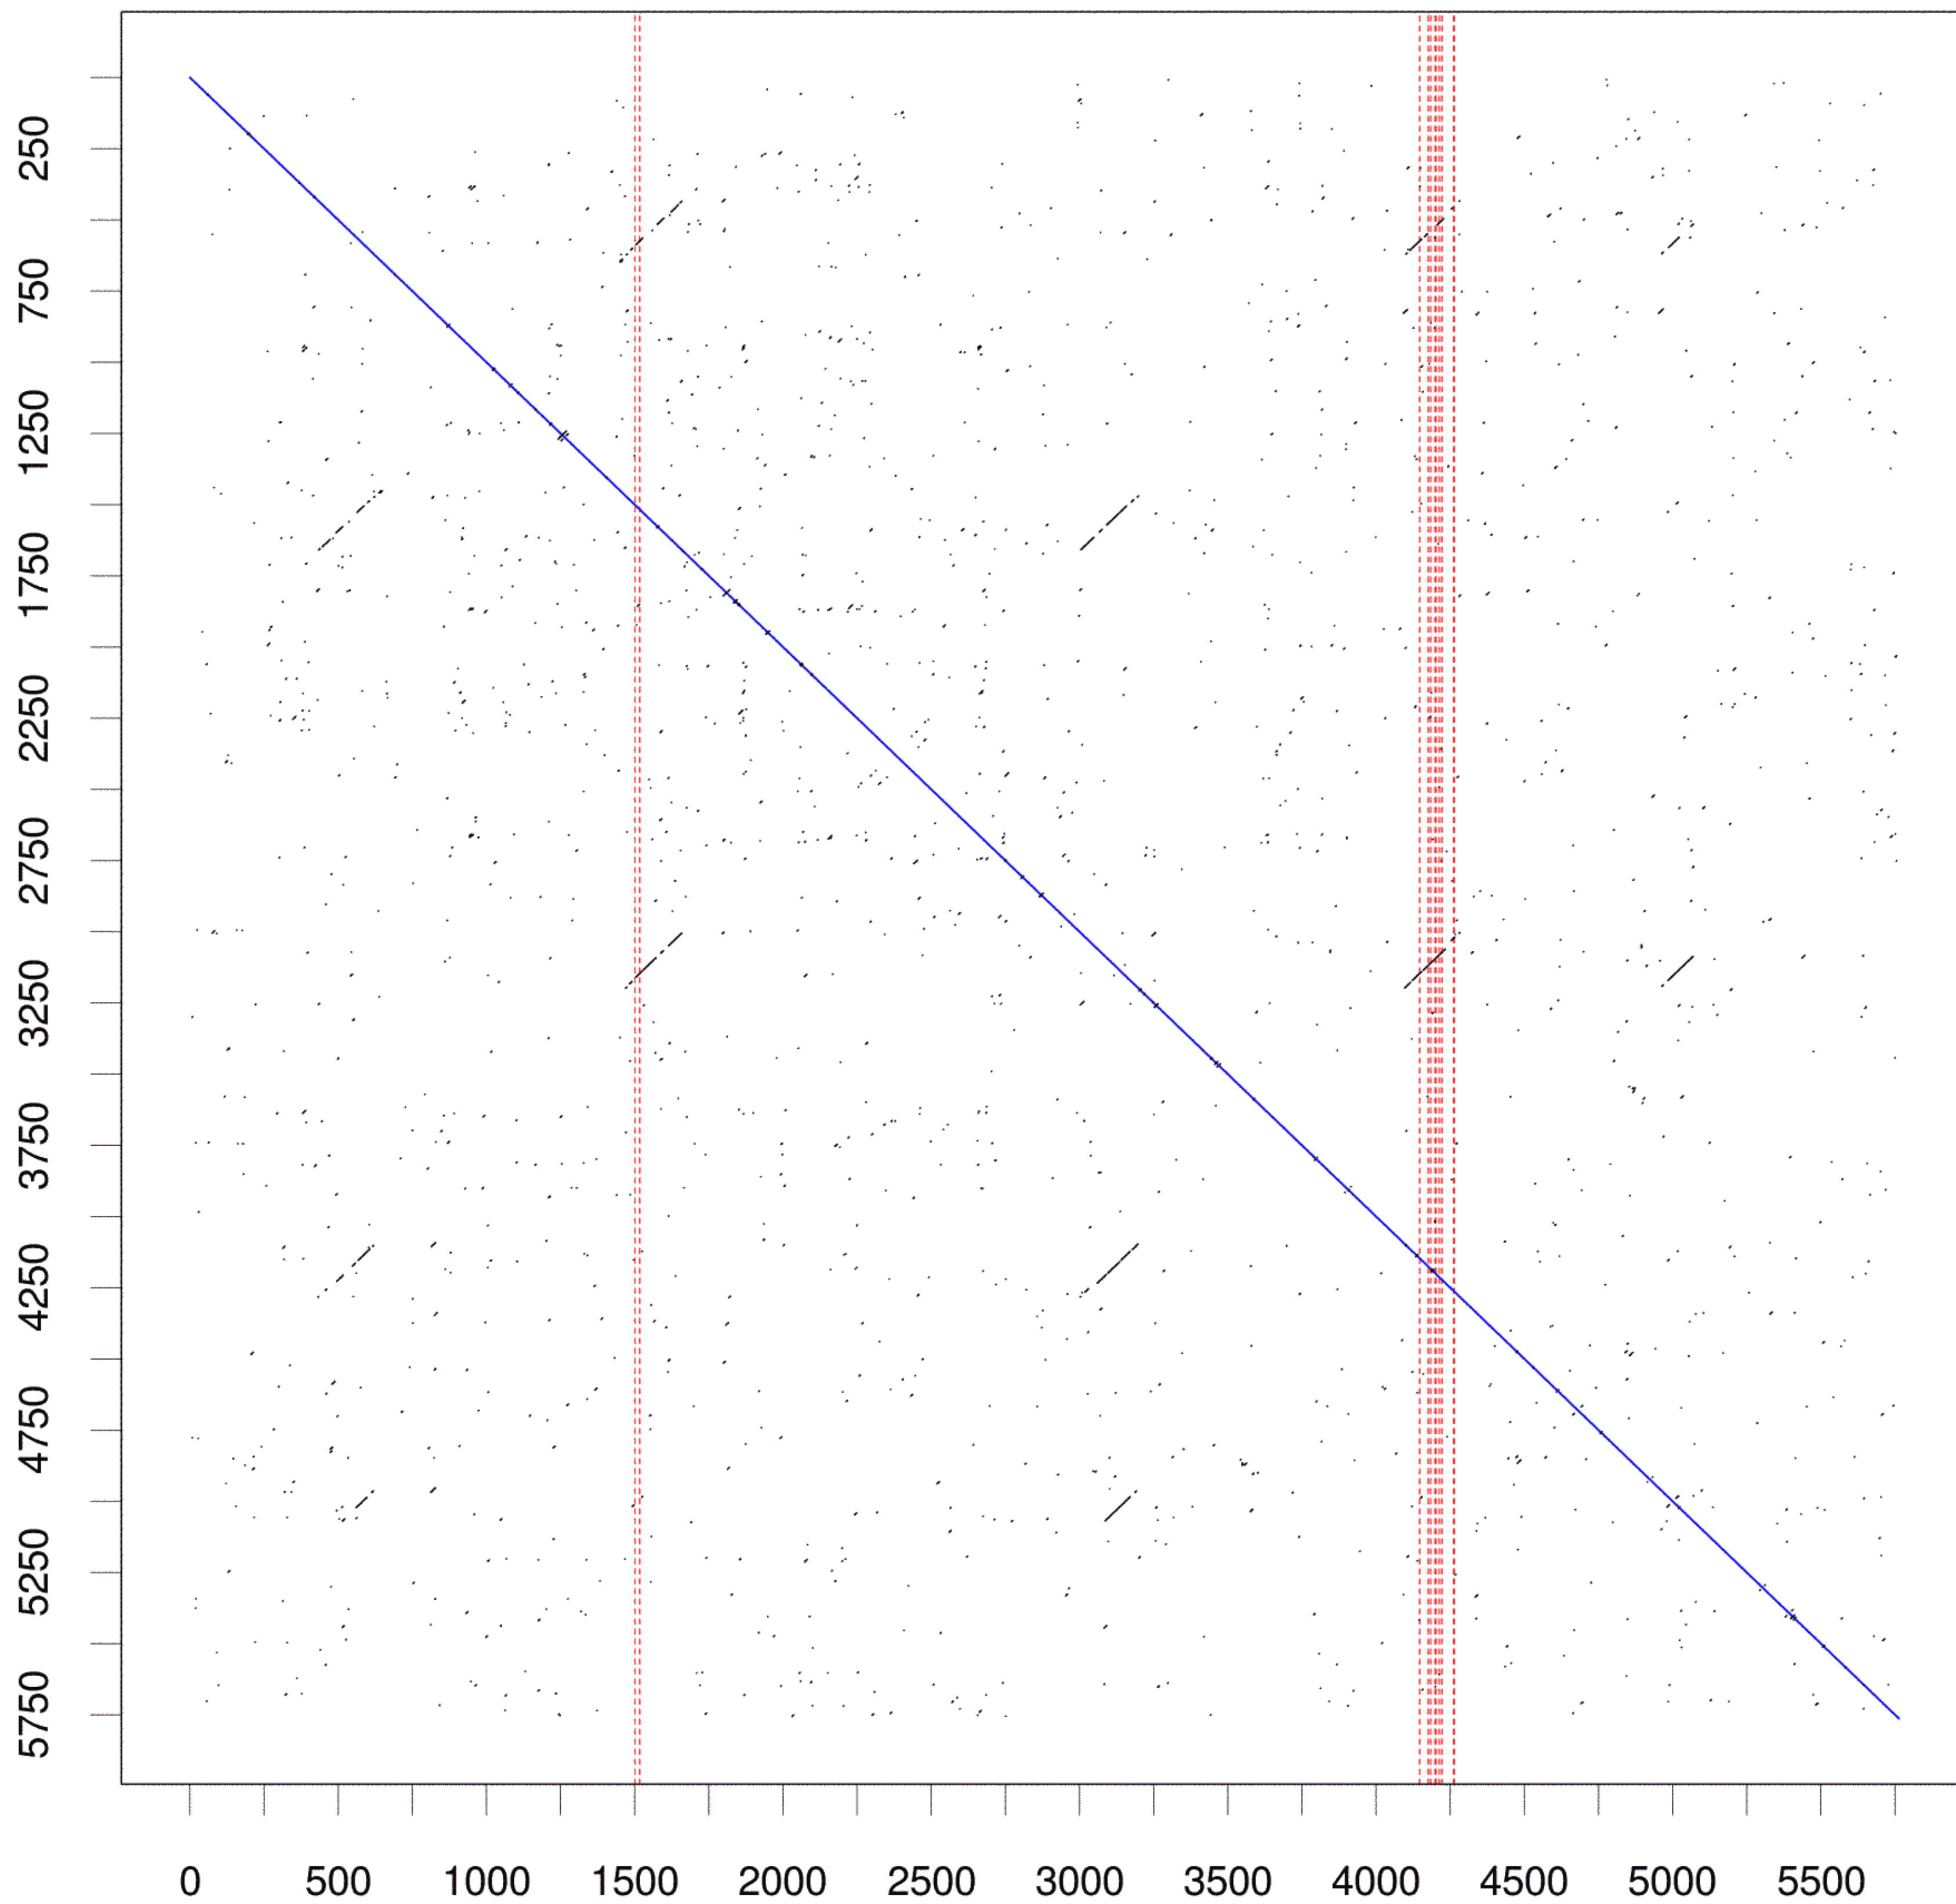

Position on PEX11G

# PFKFB2

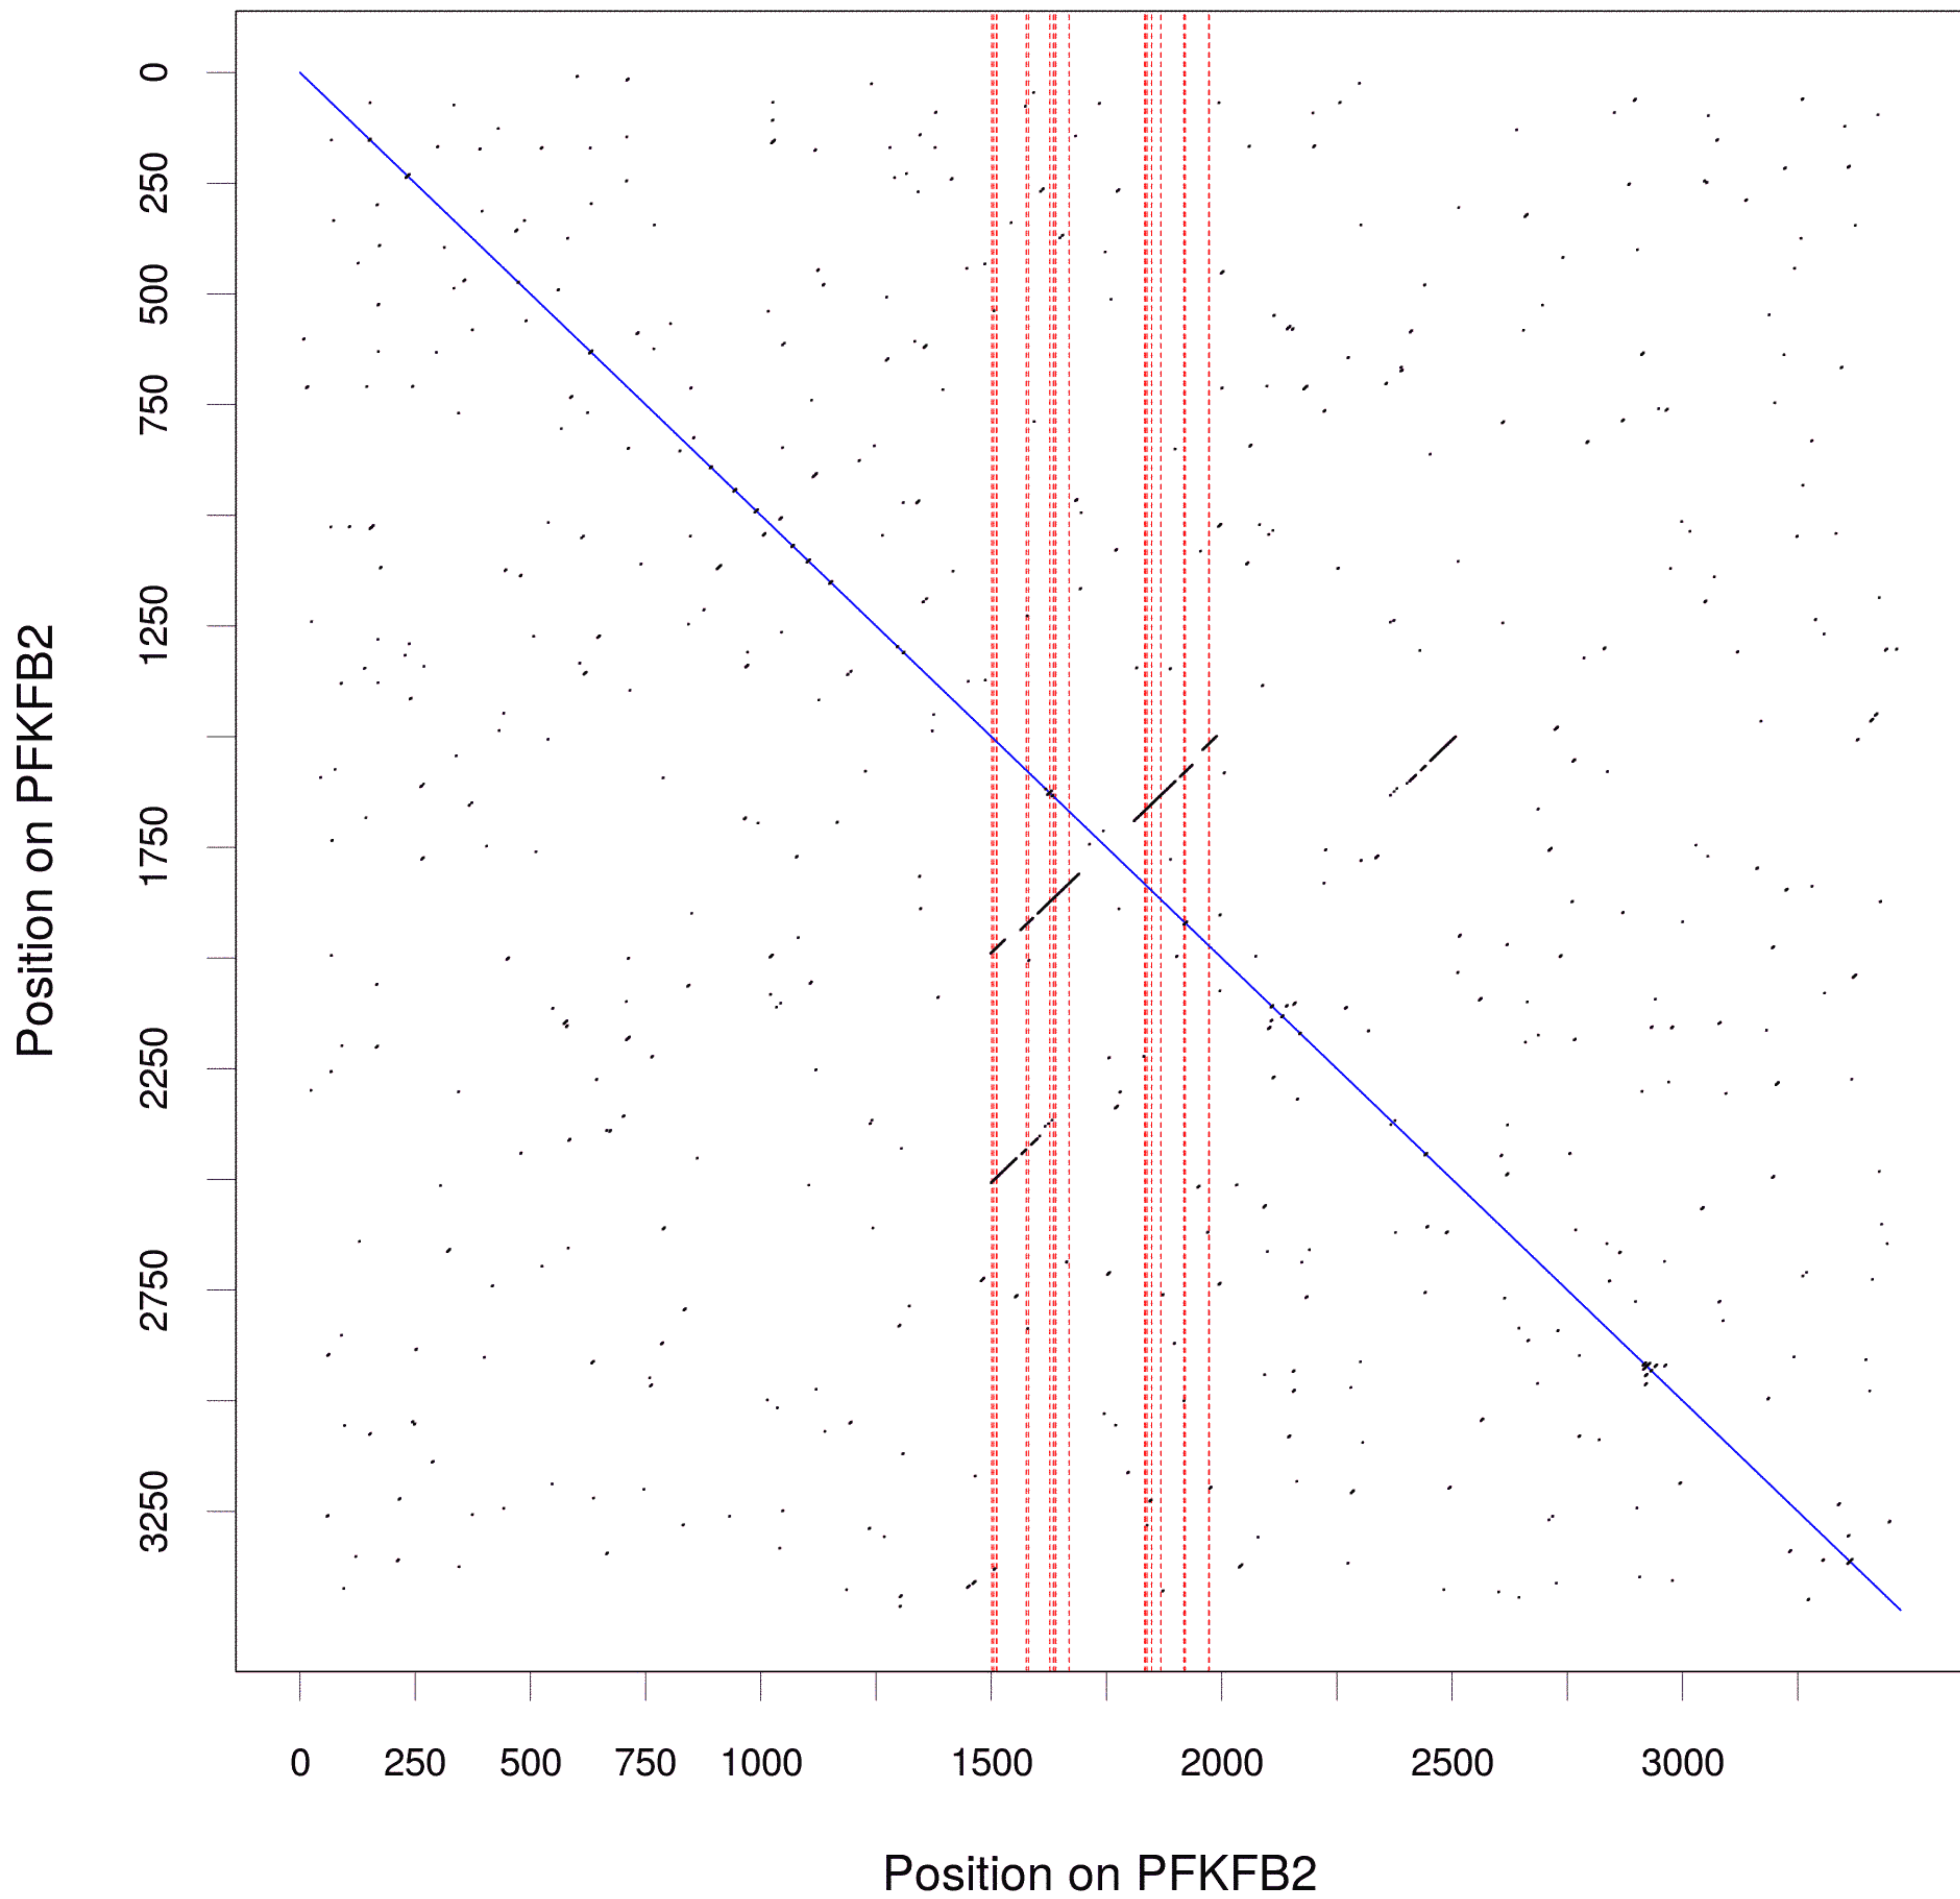

# PGPEP1

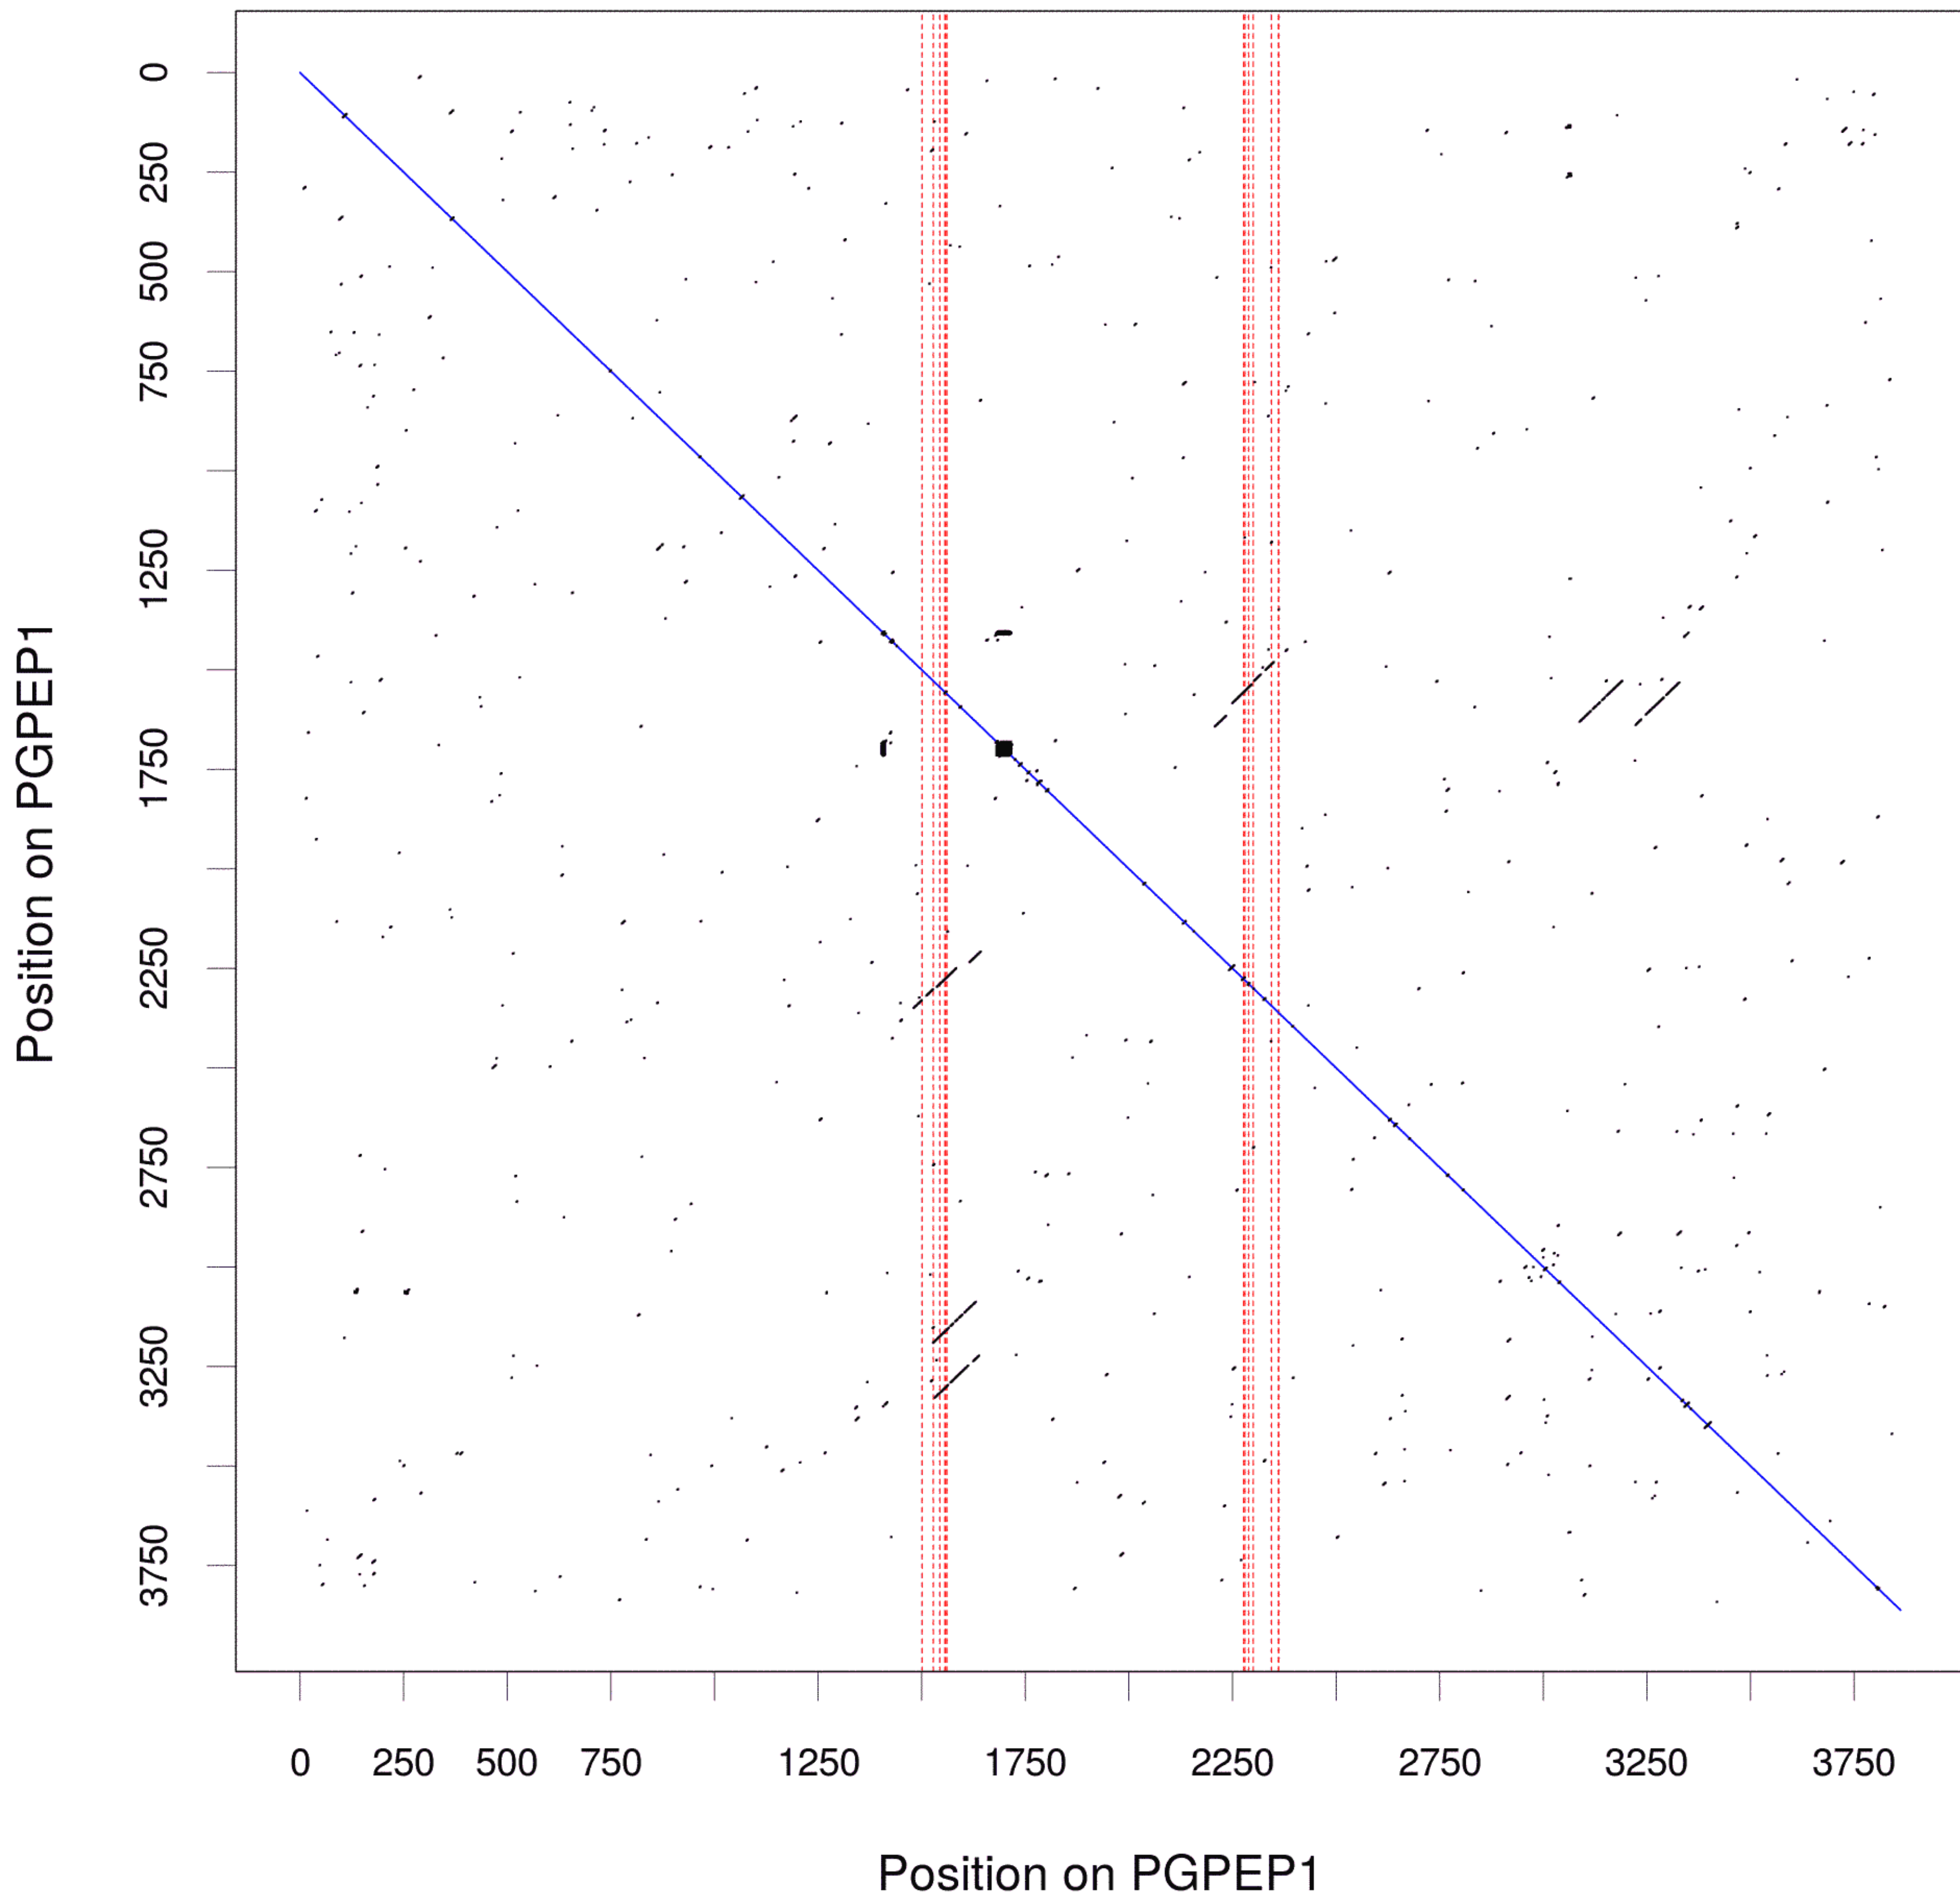

# PHF5A

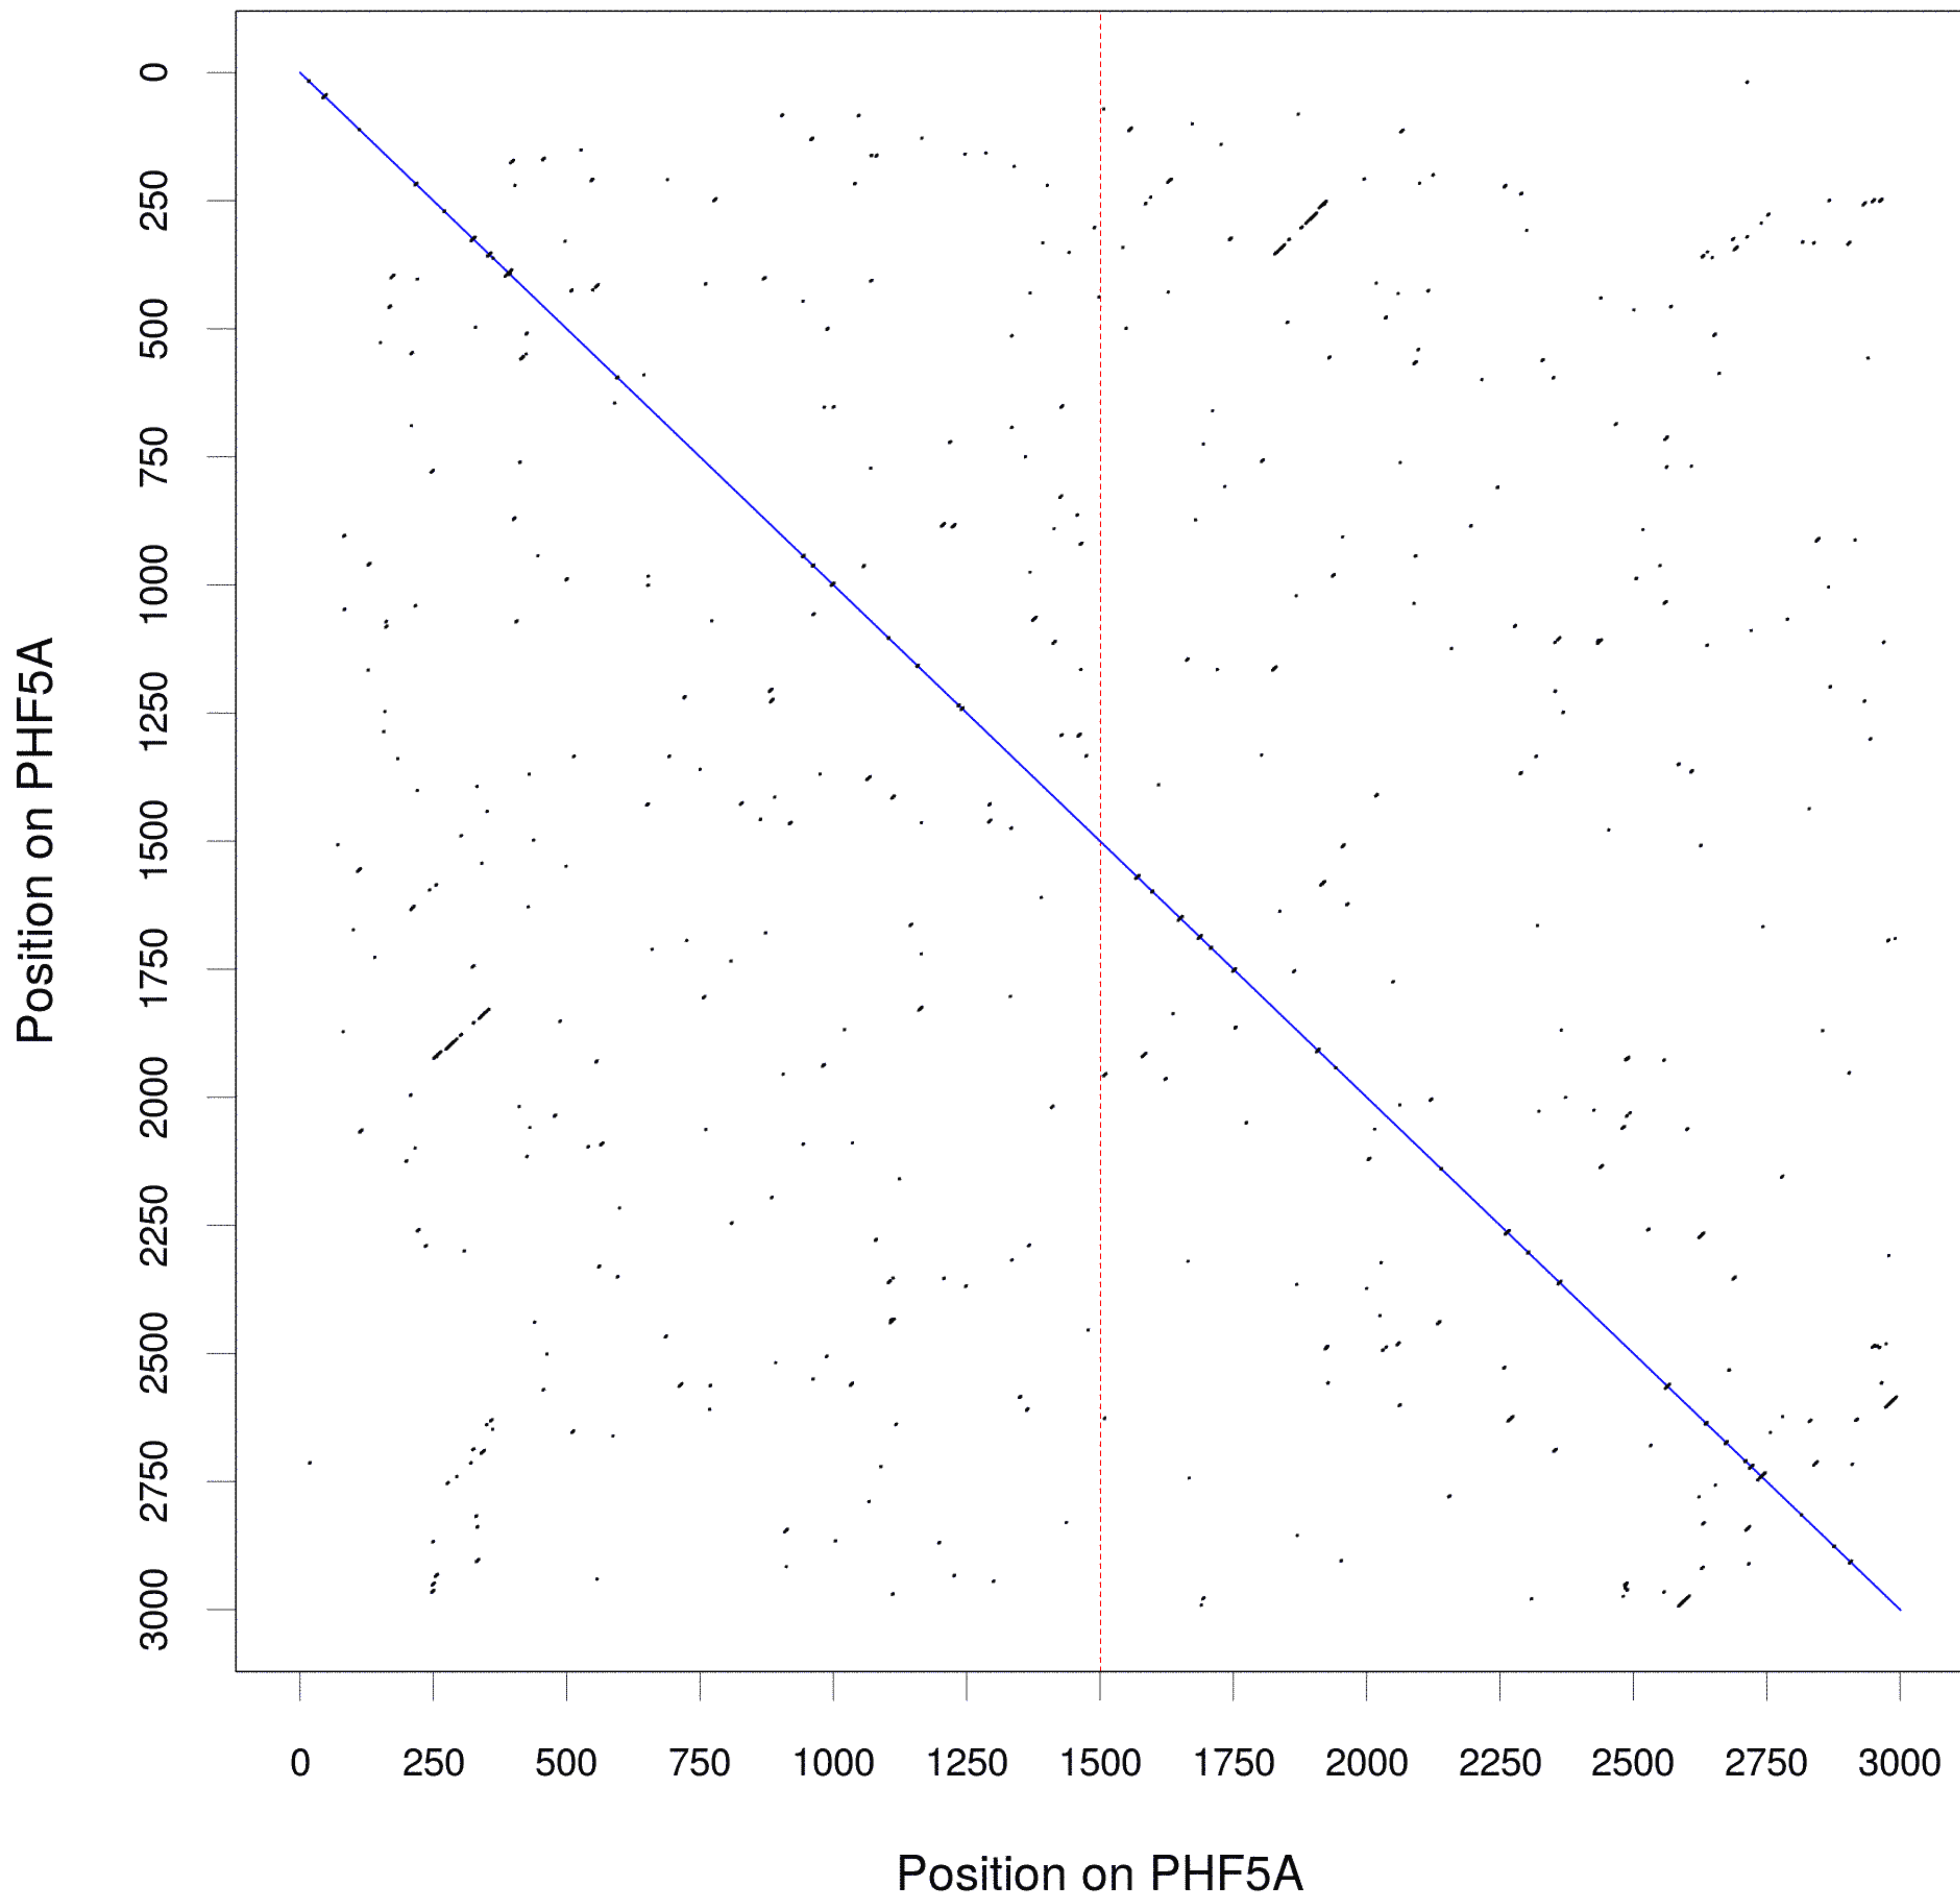

# PHF11

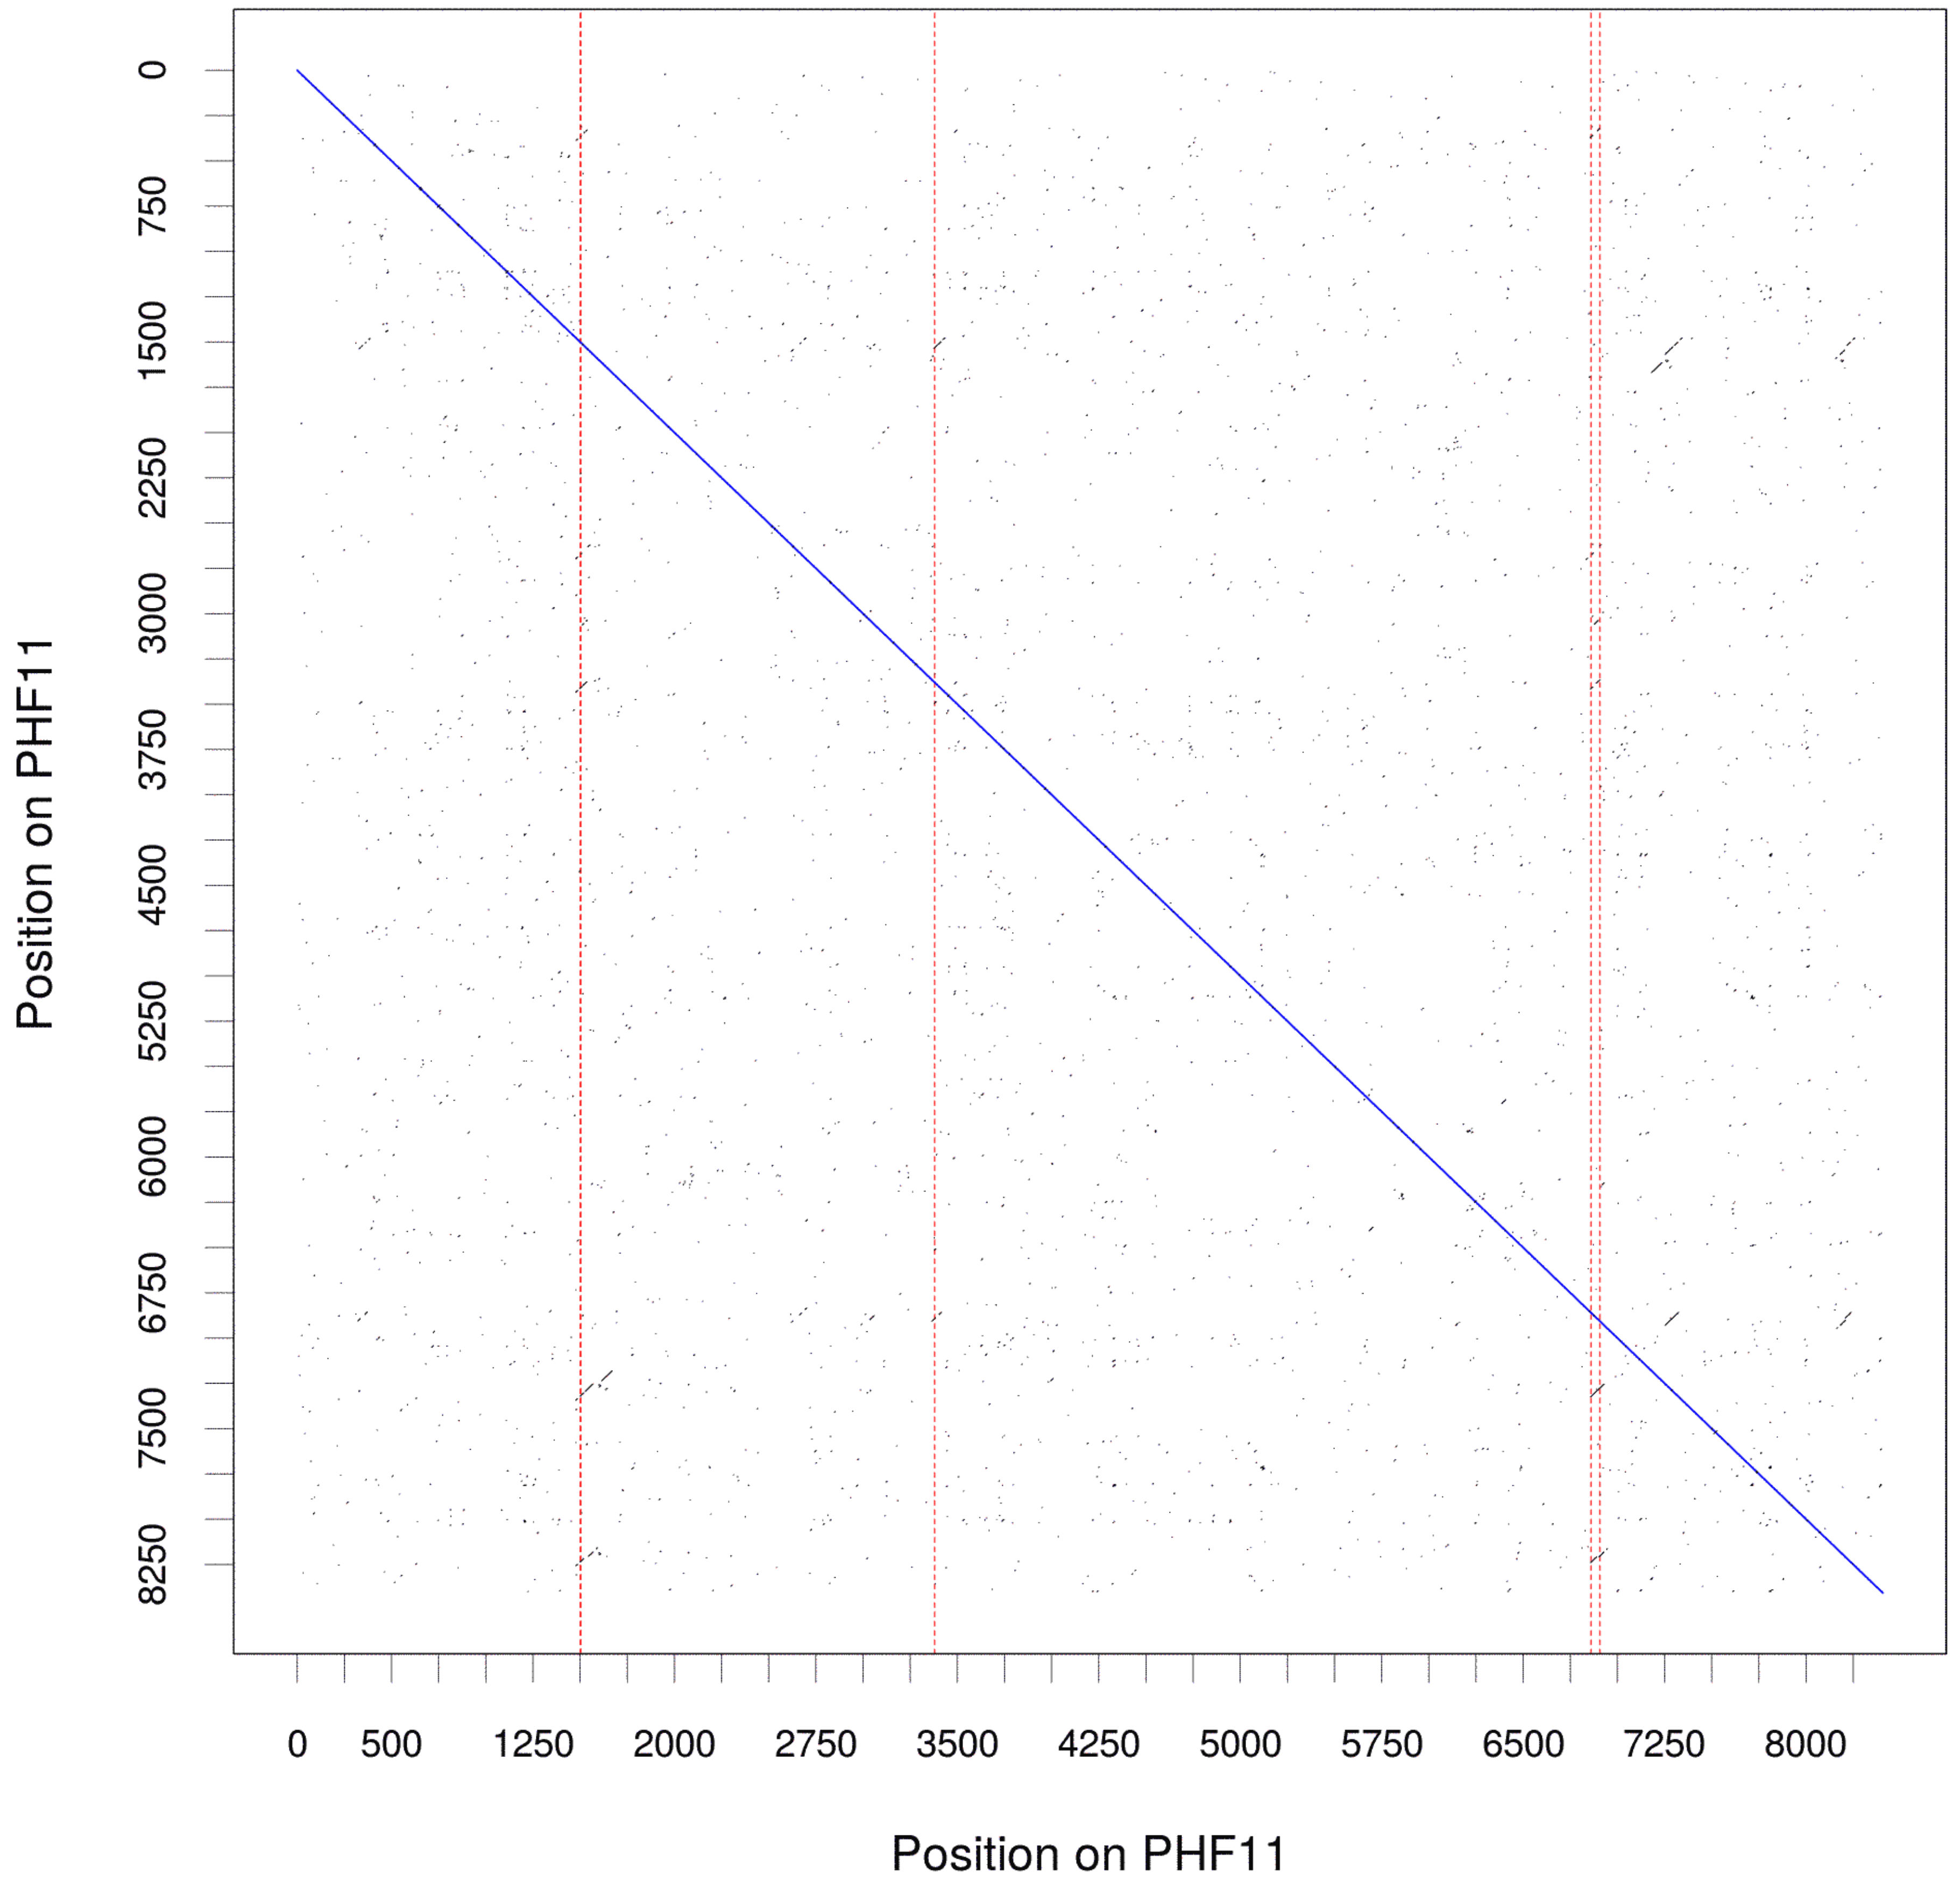

# PIGS

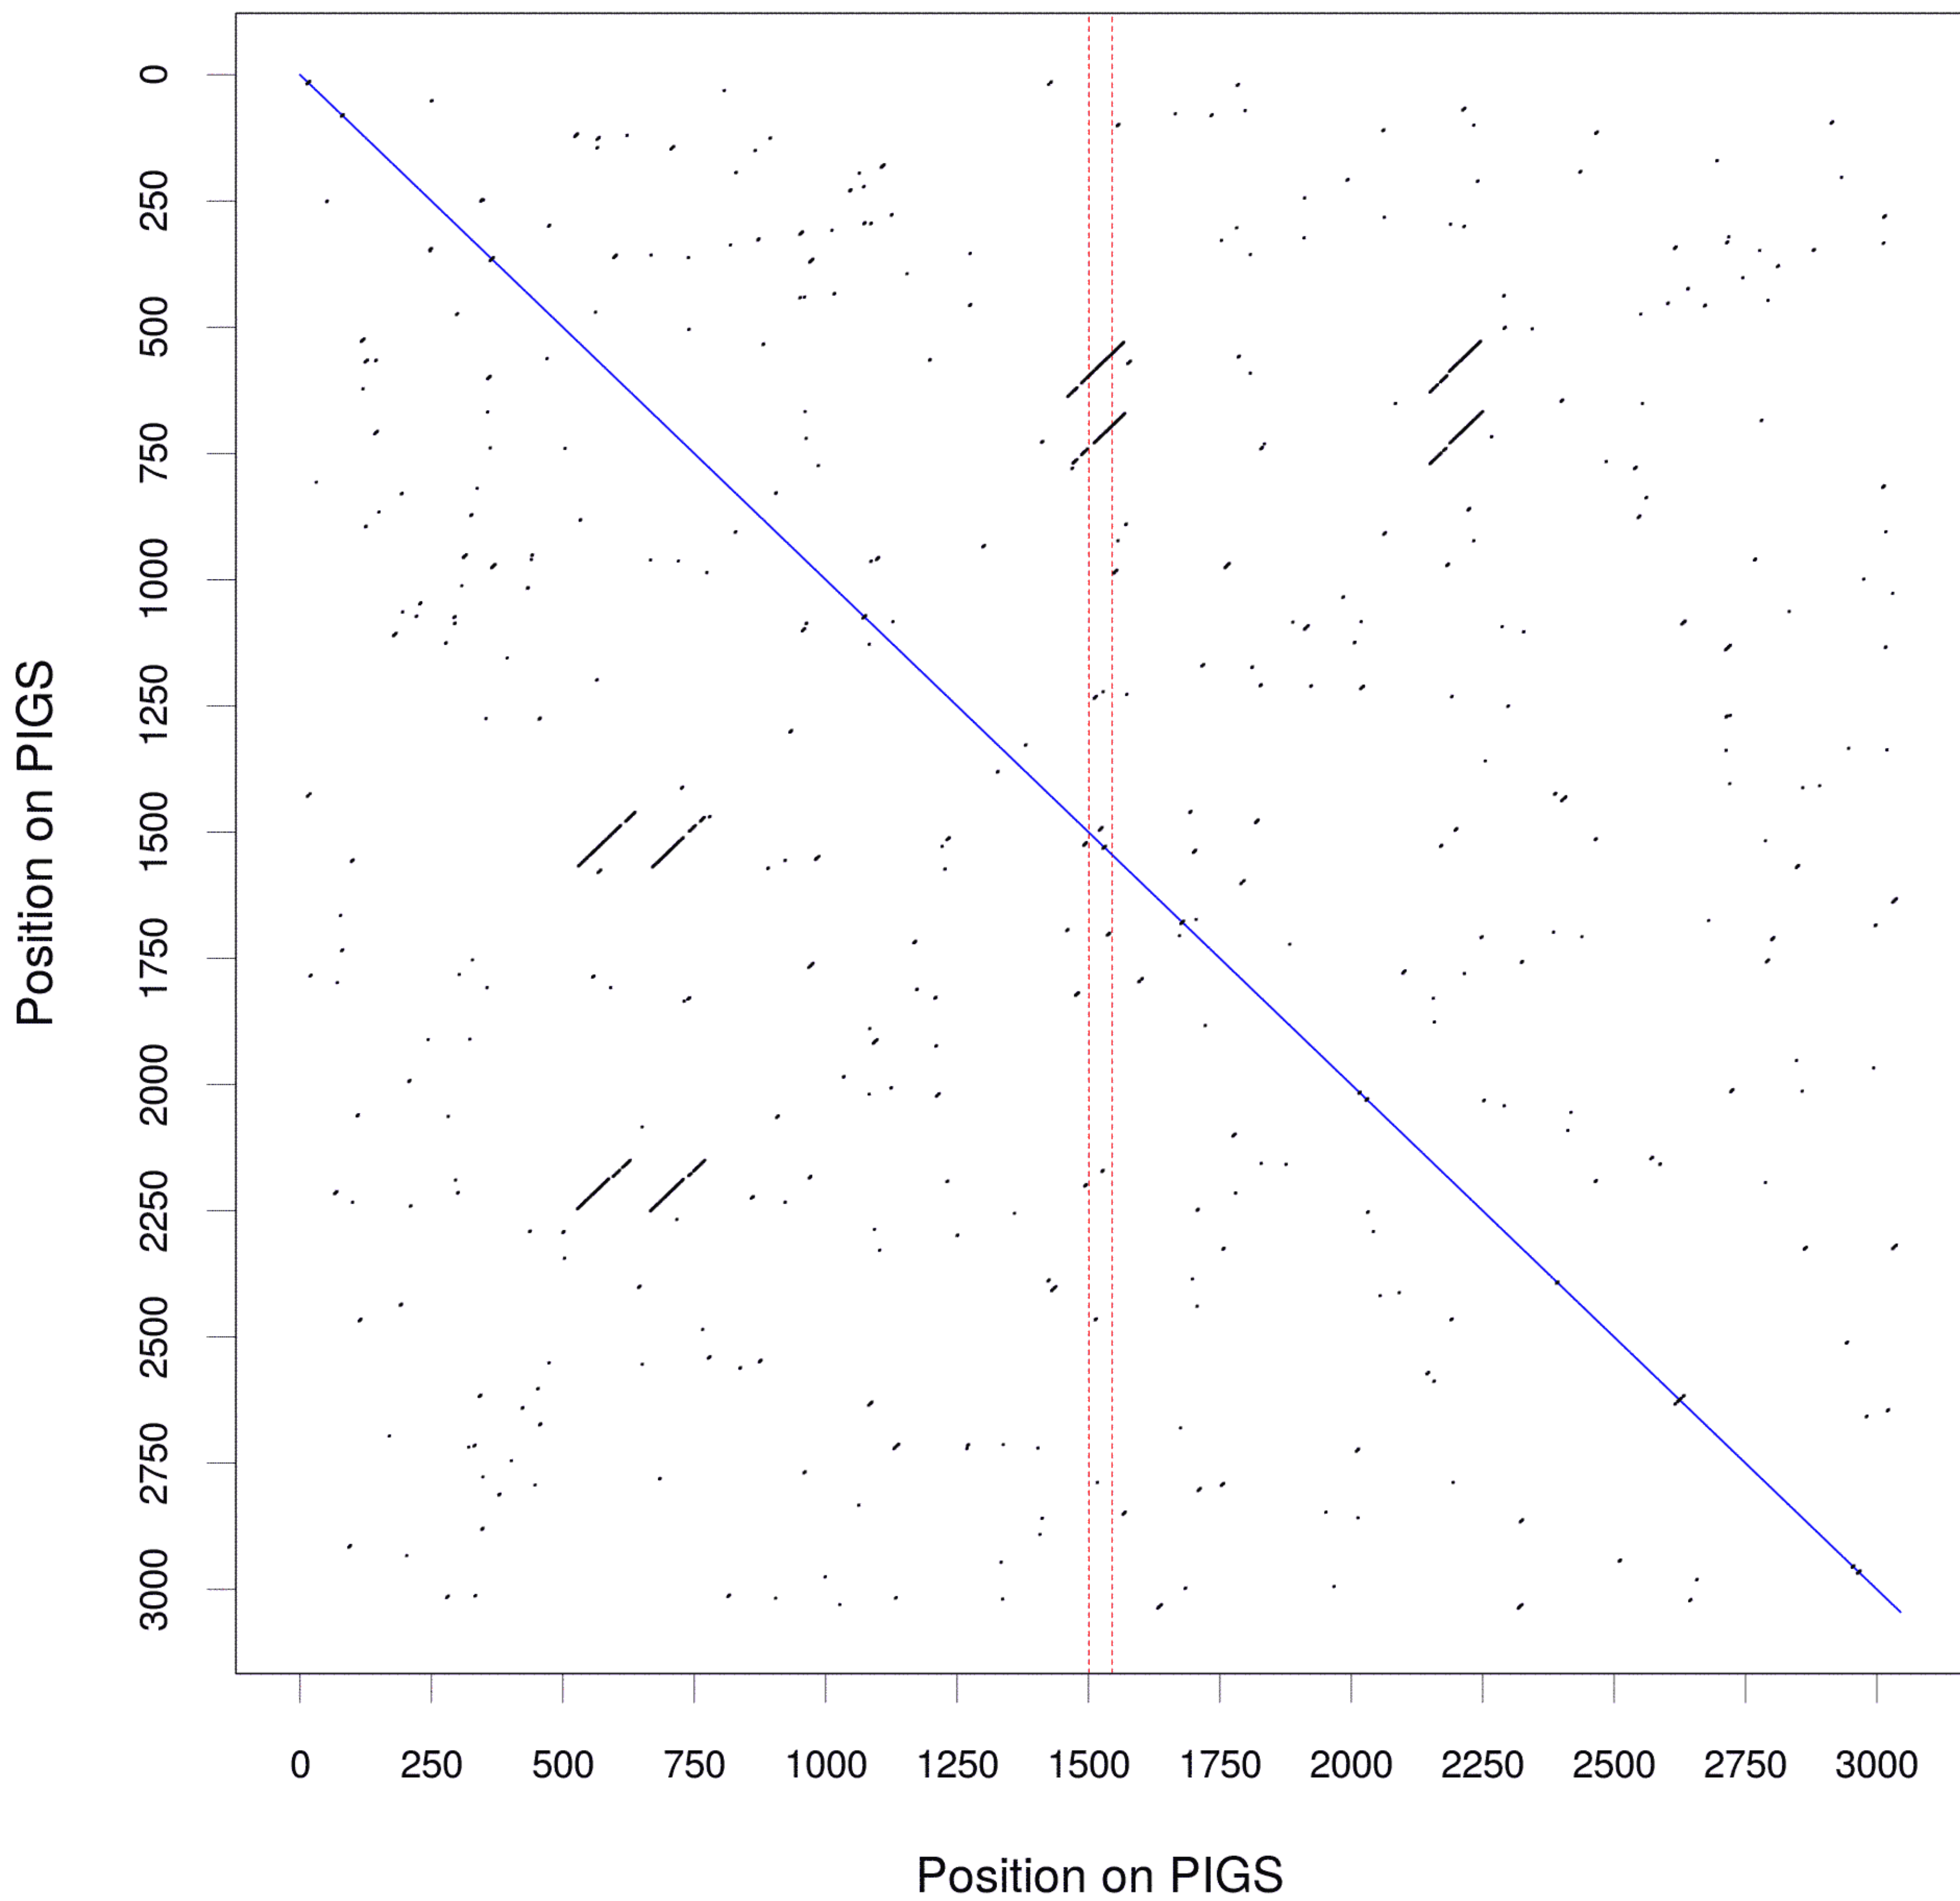

# PIGZ

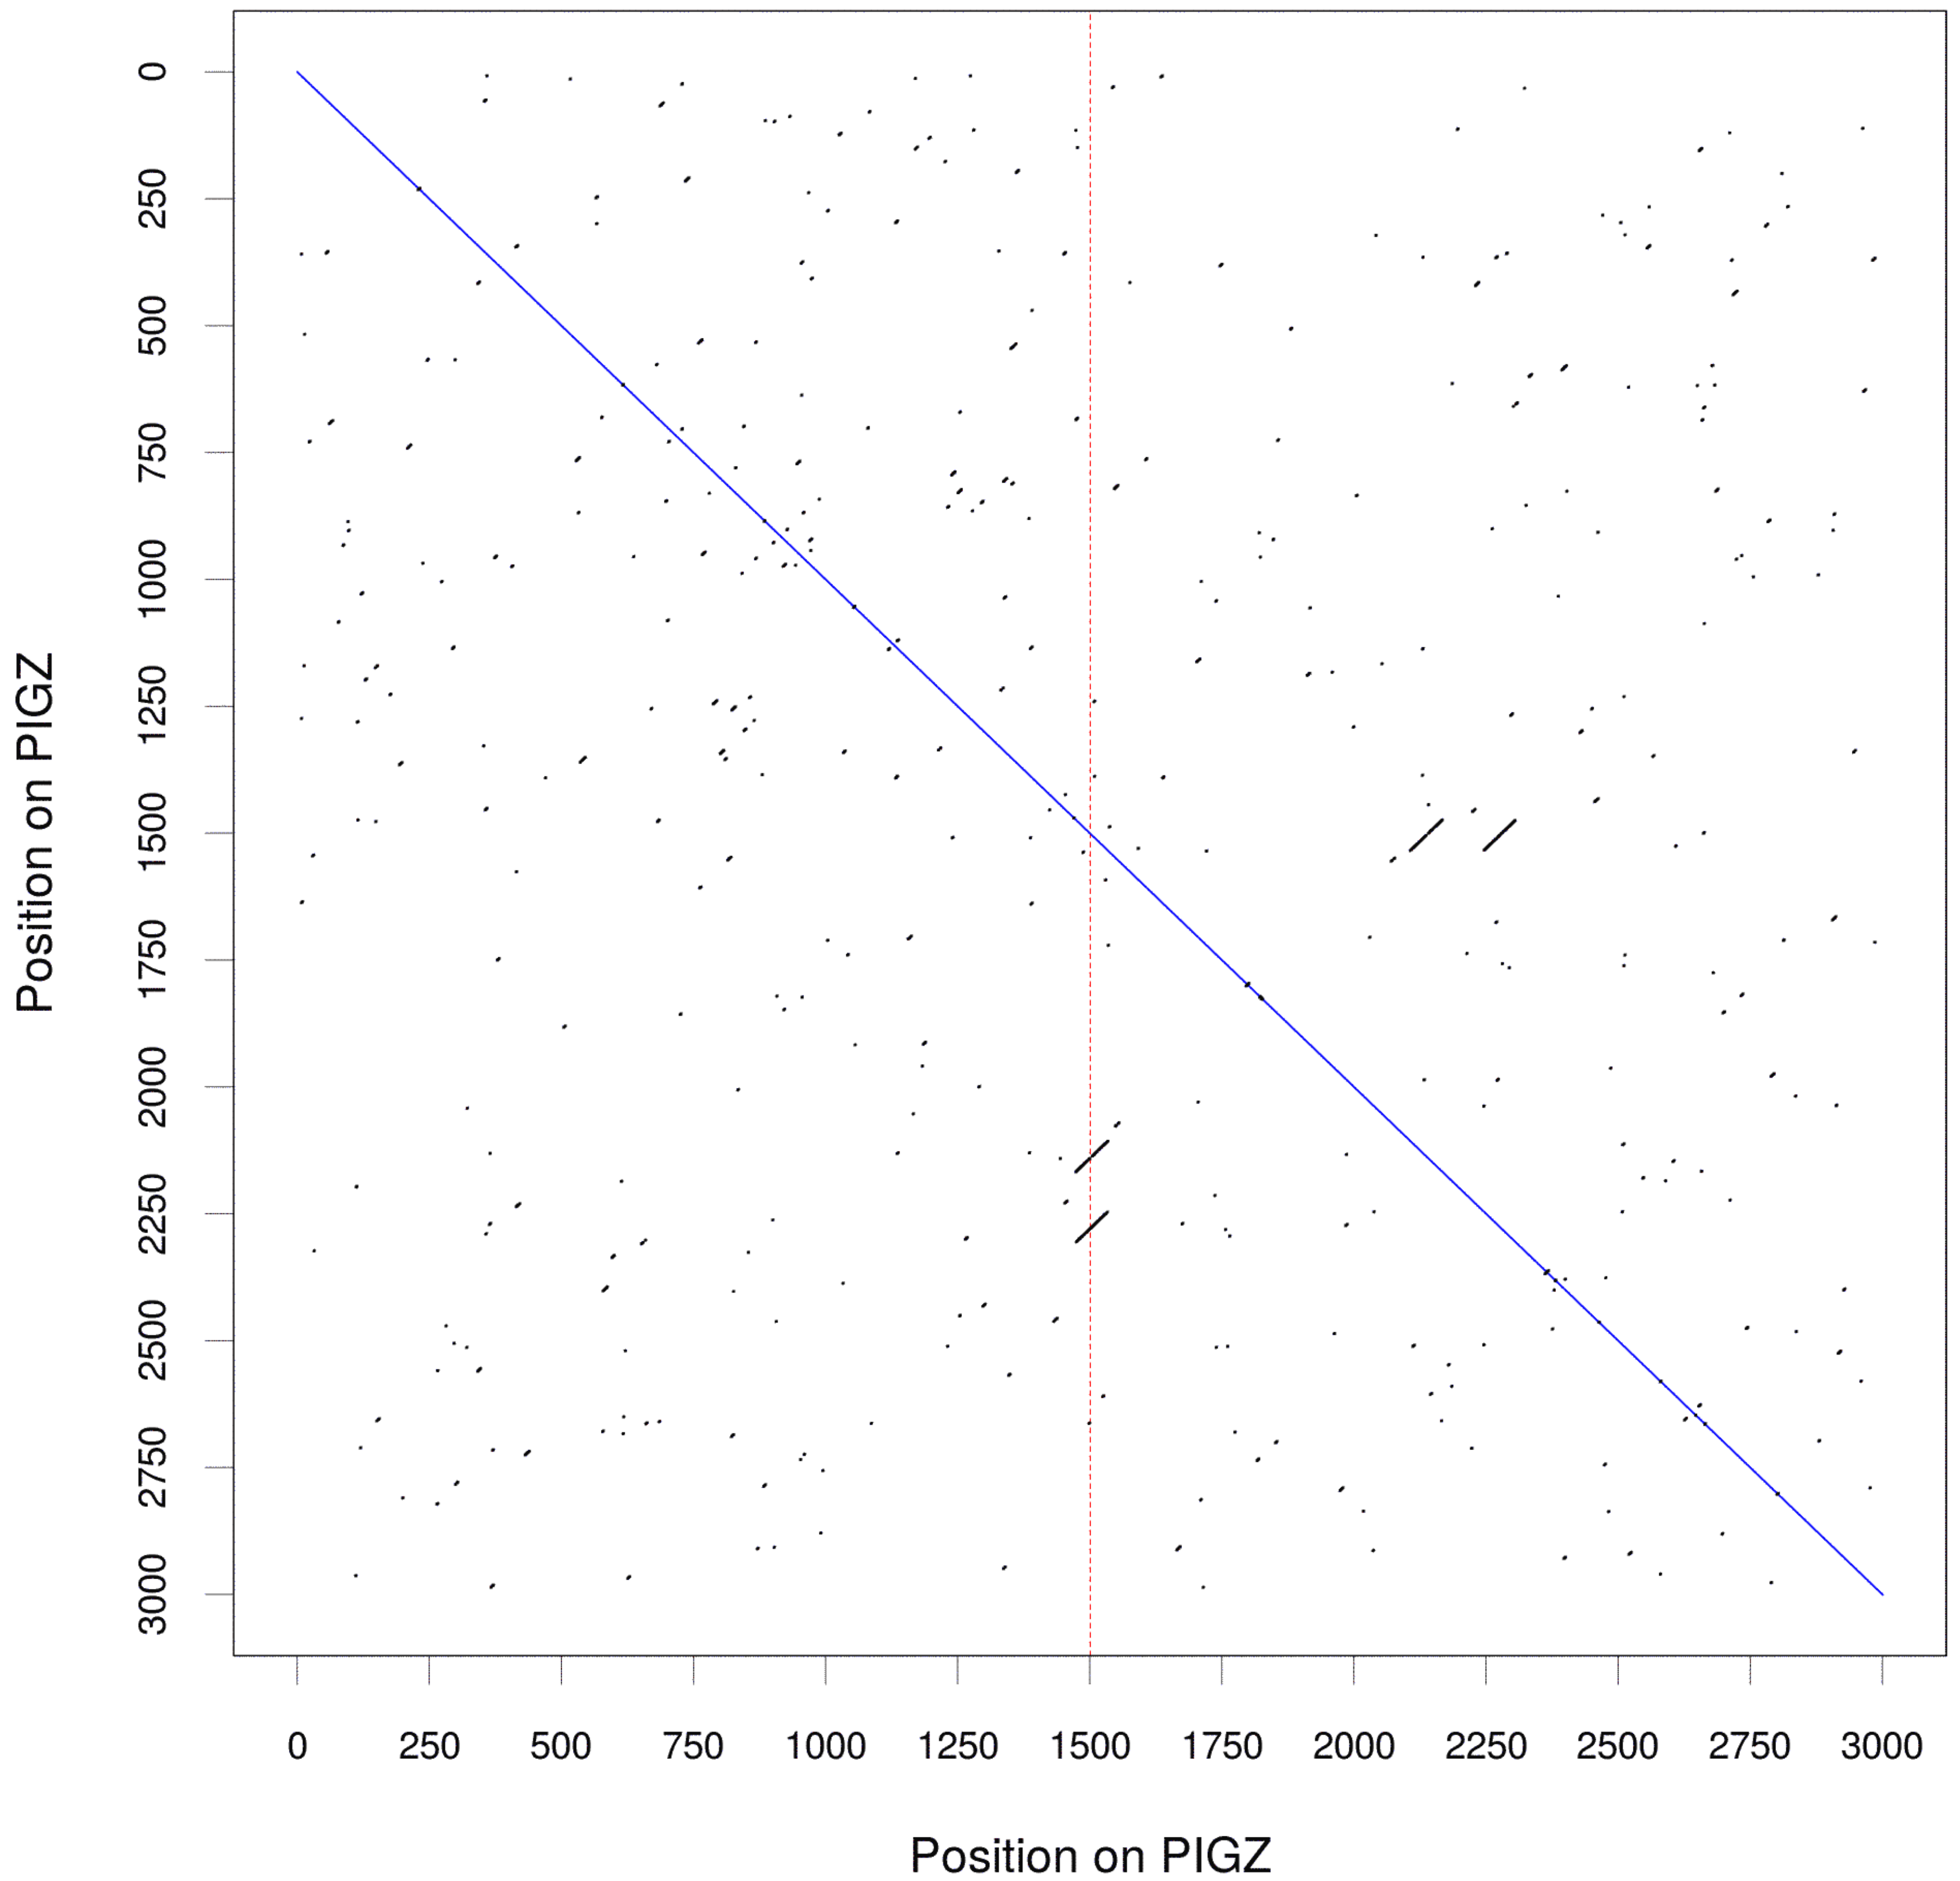

# PLEC

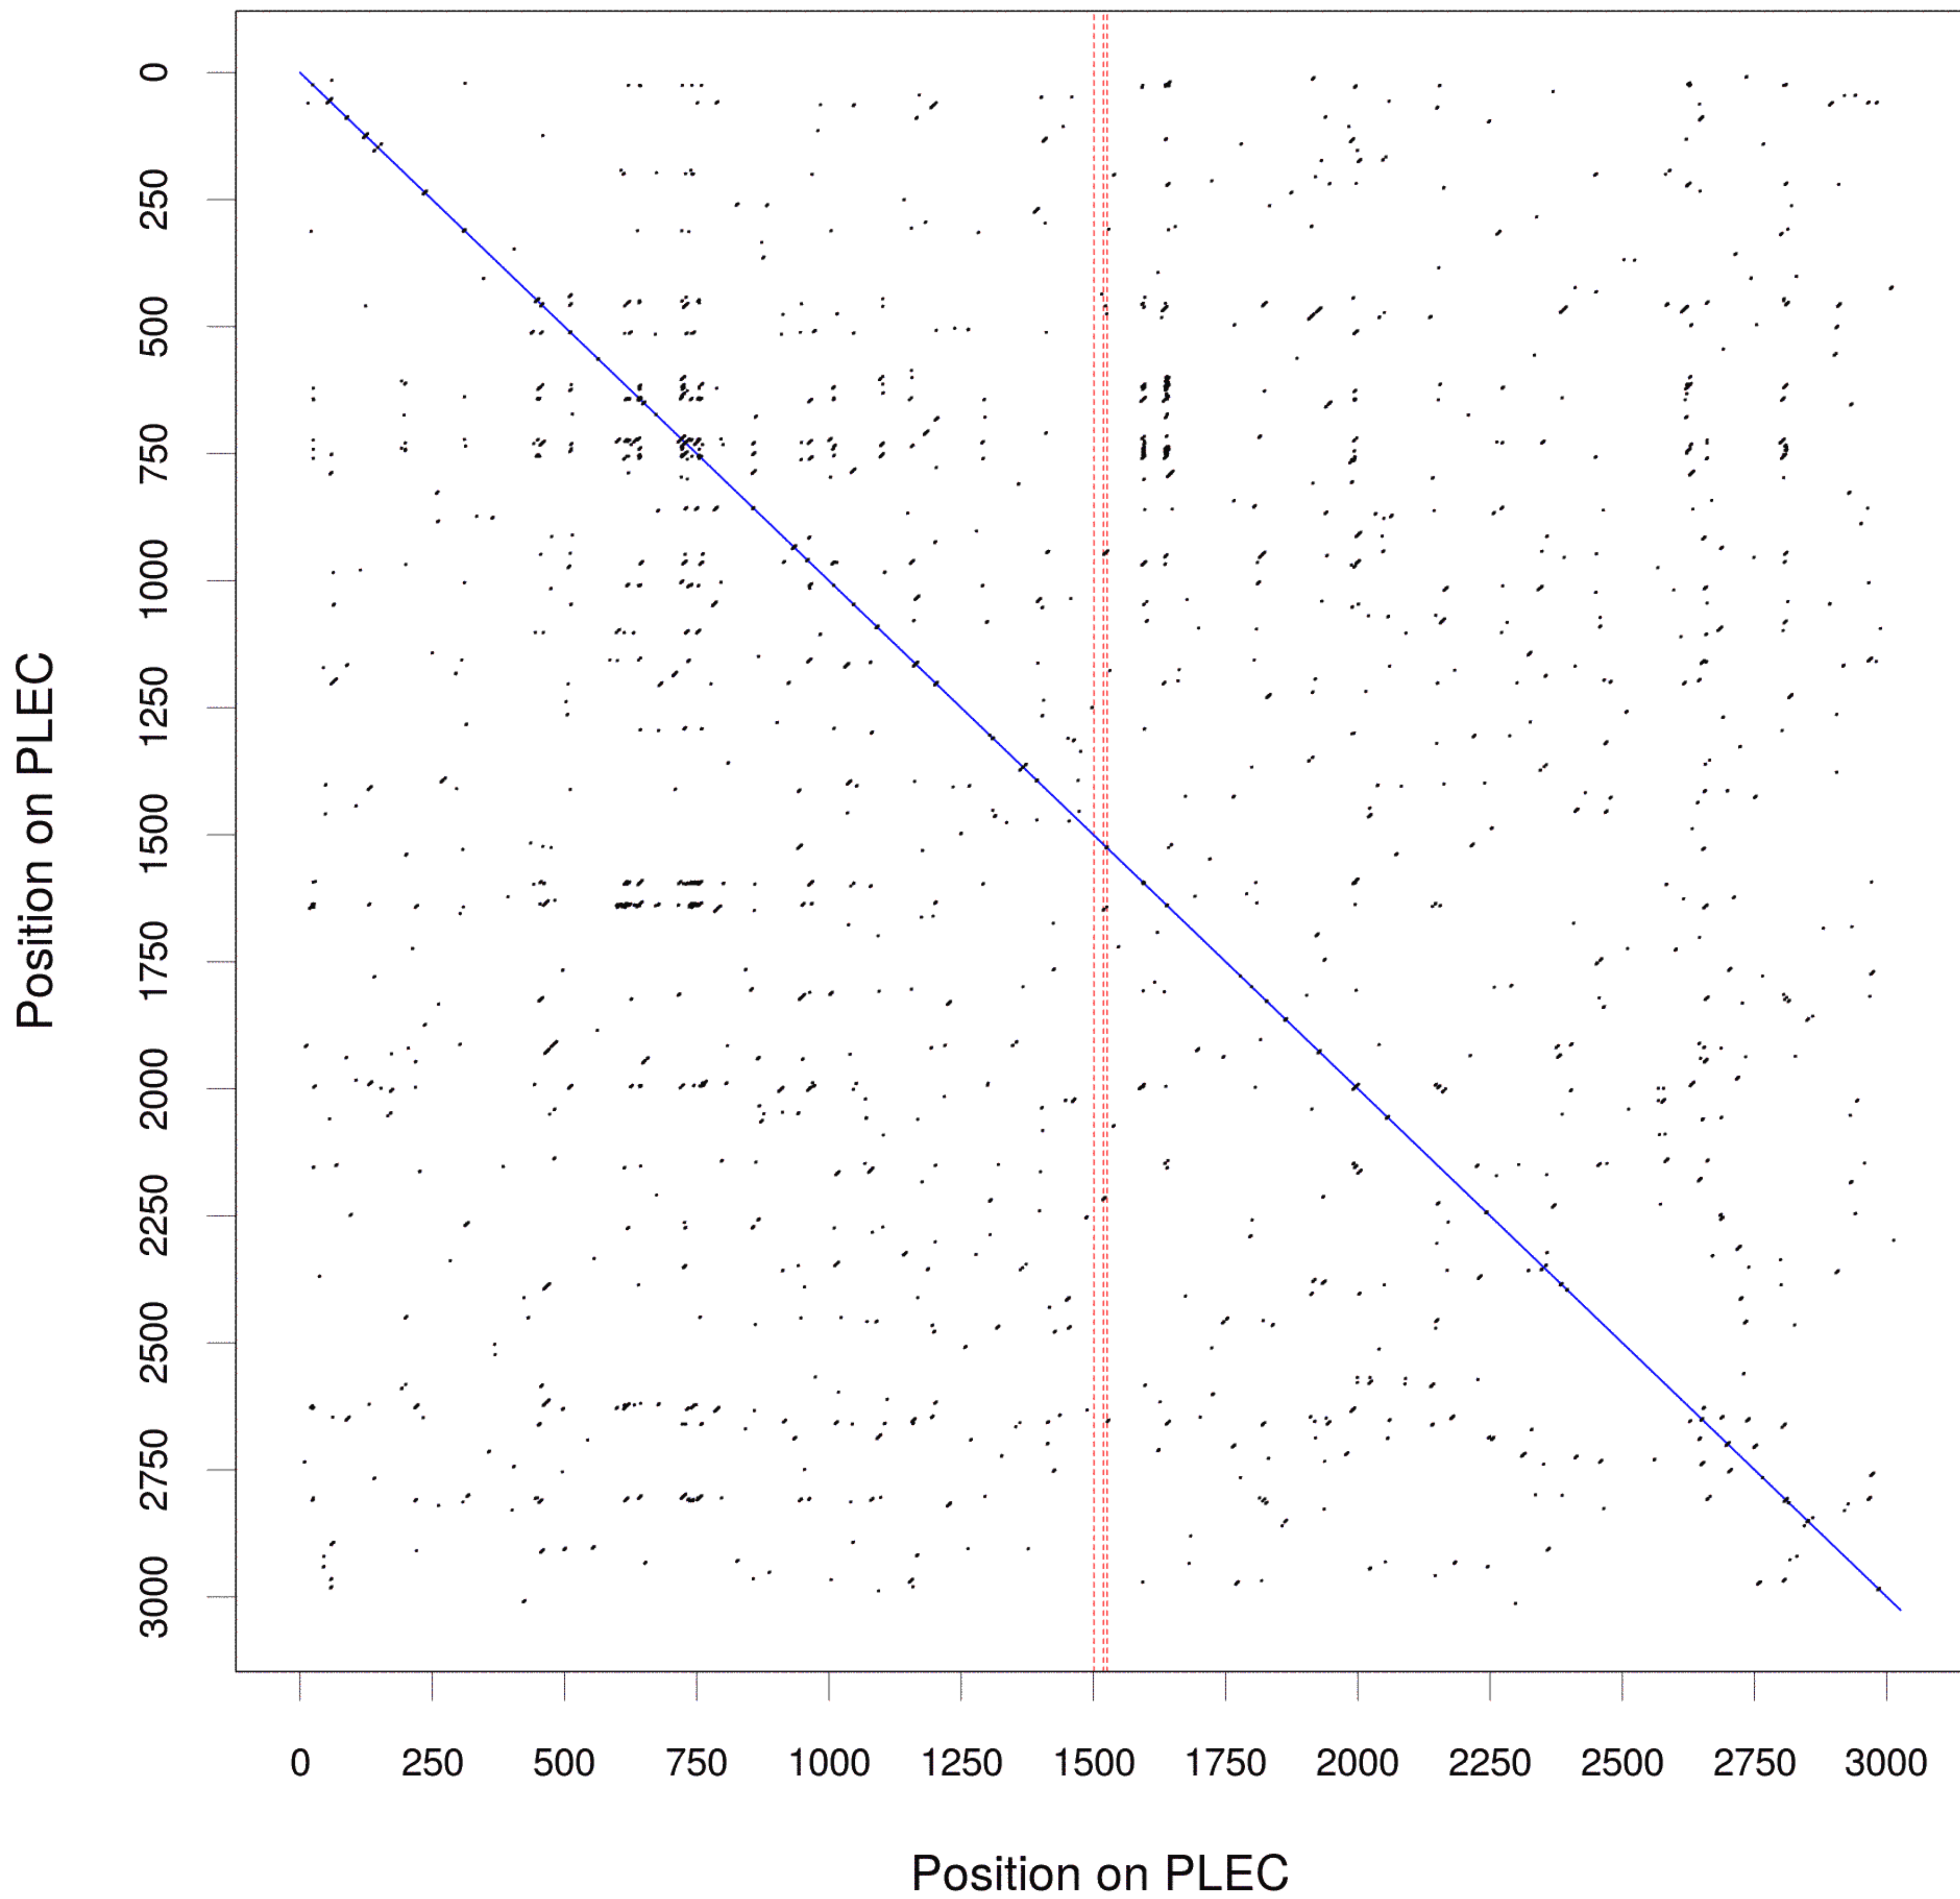



# PLIN1

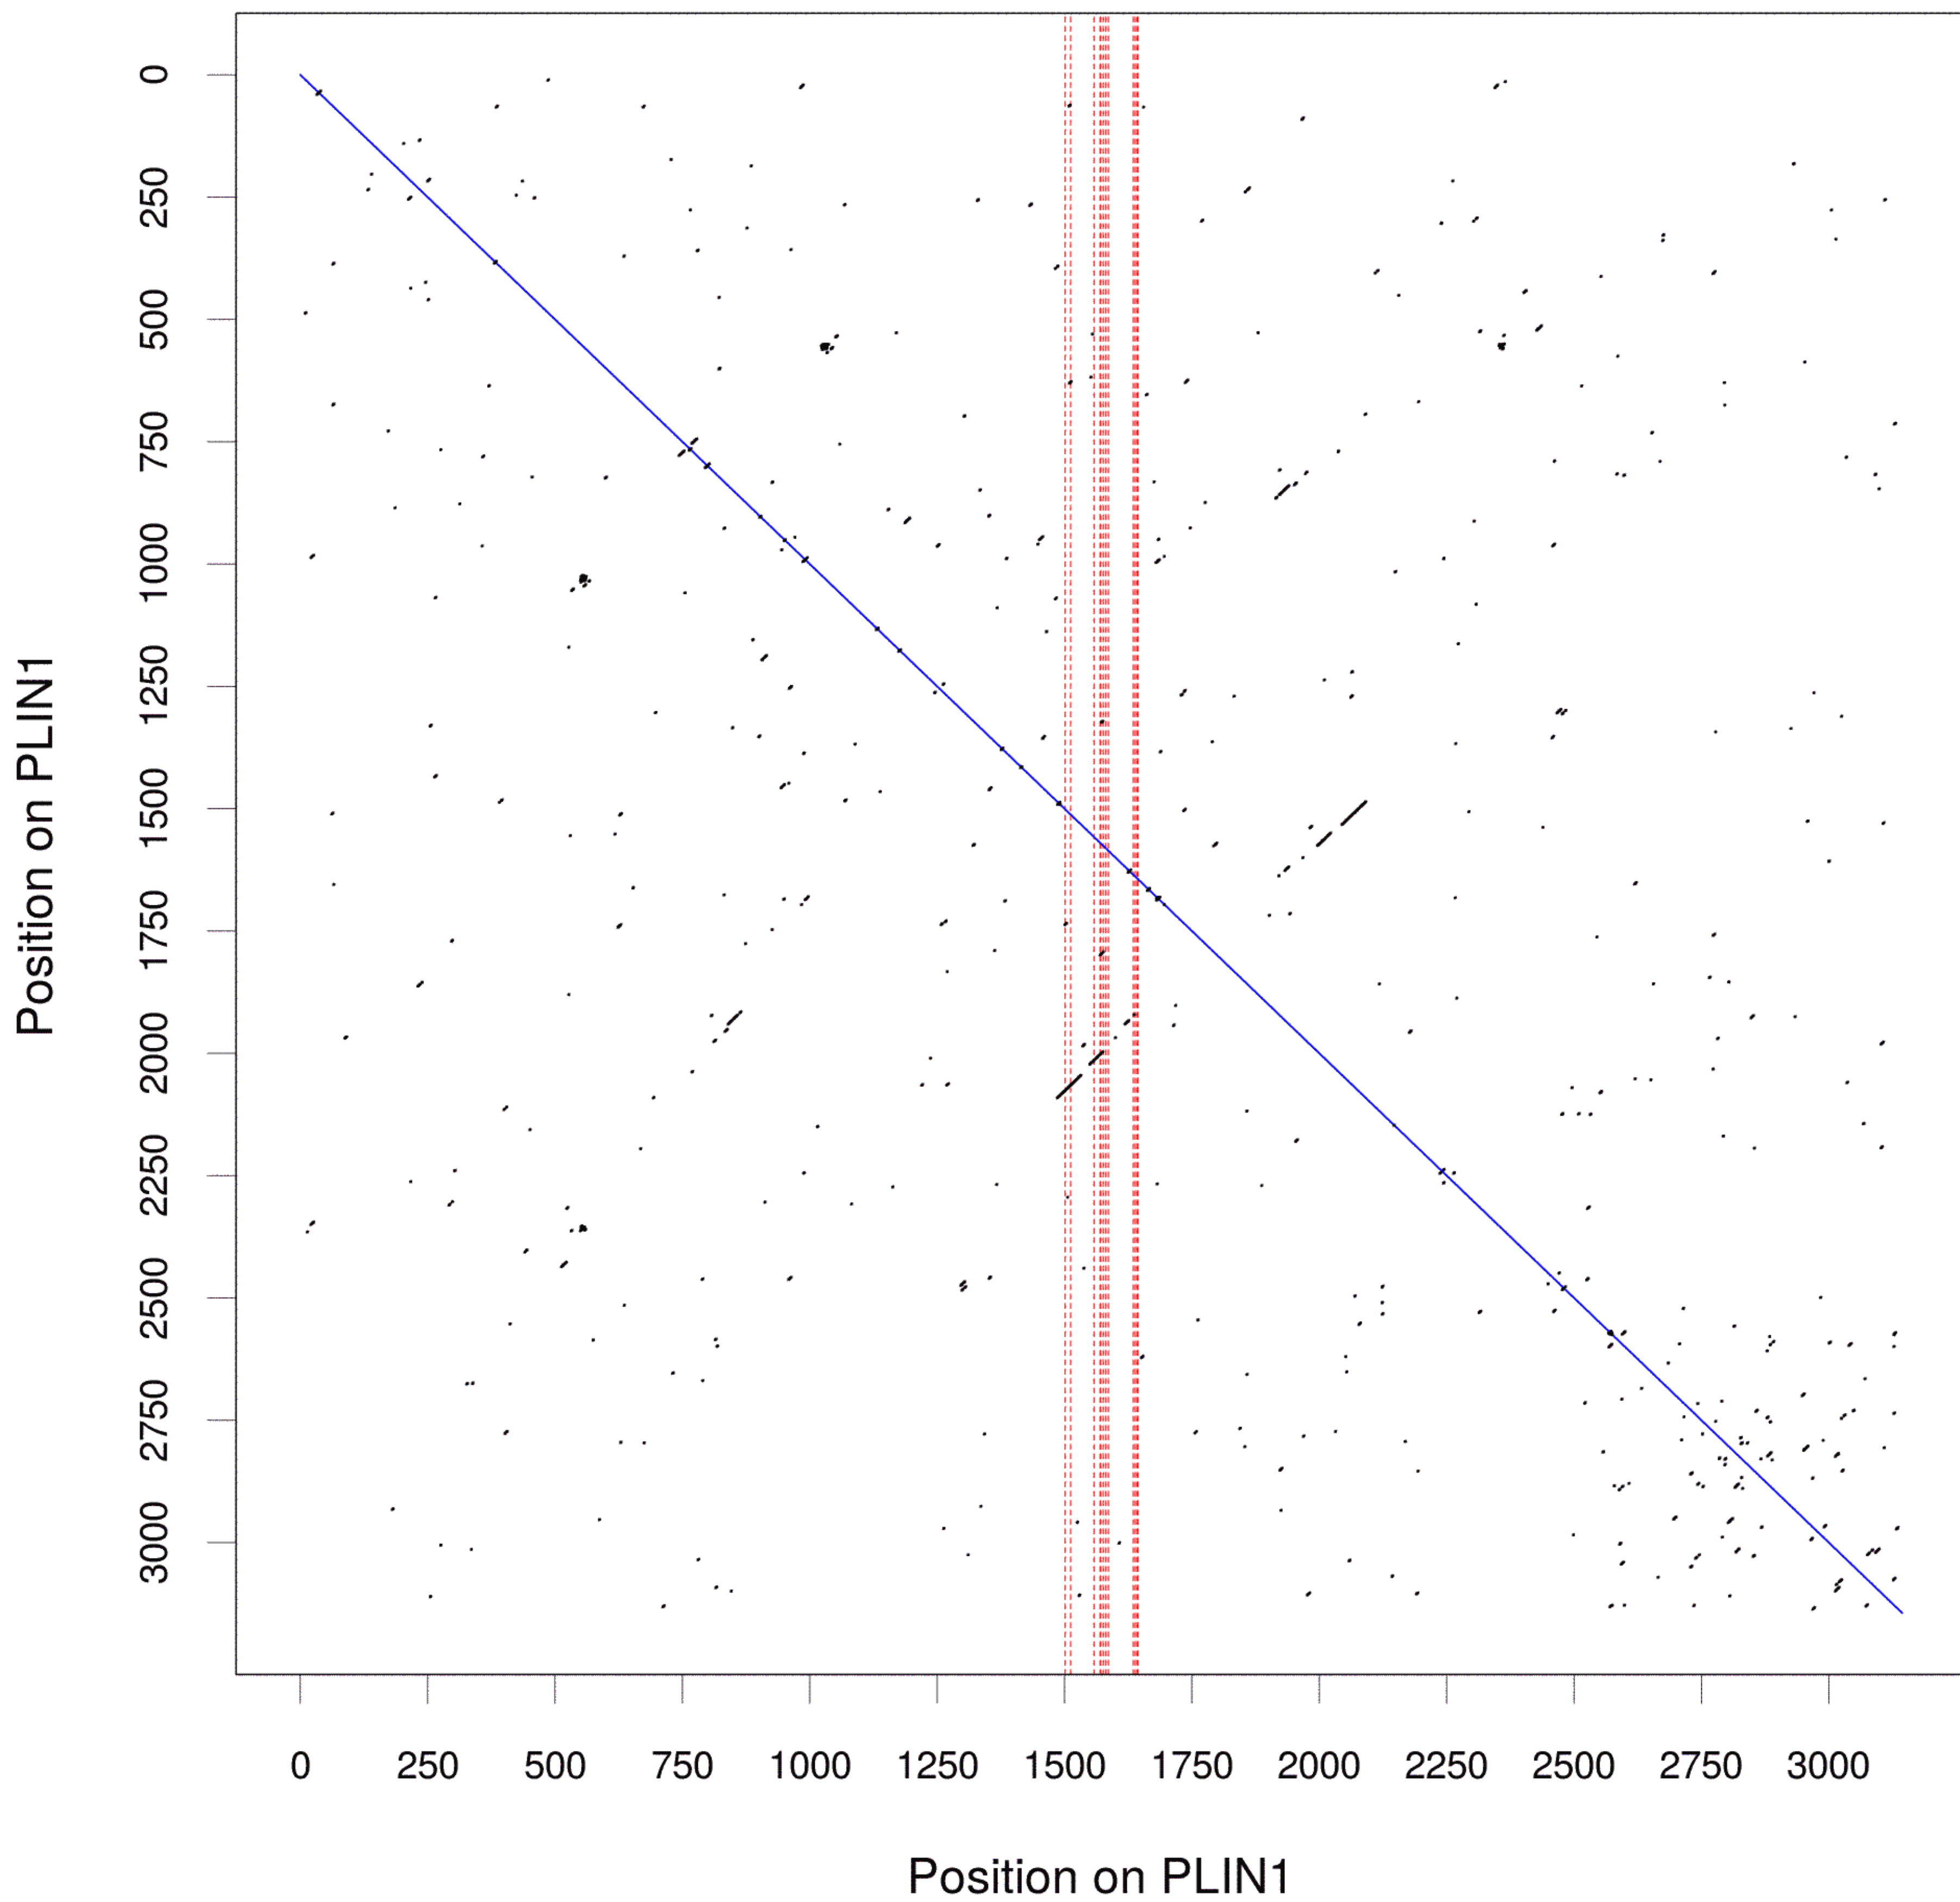

# PLIN3

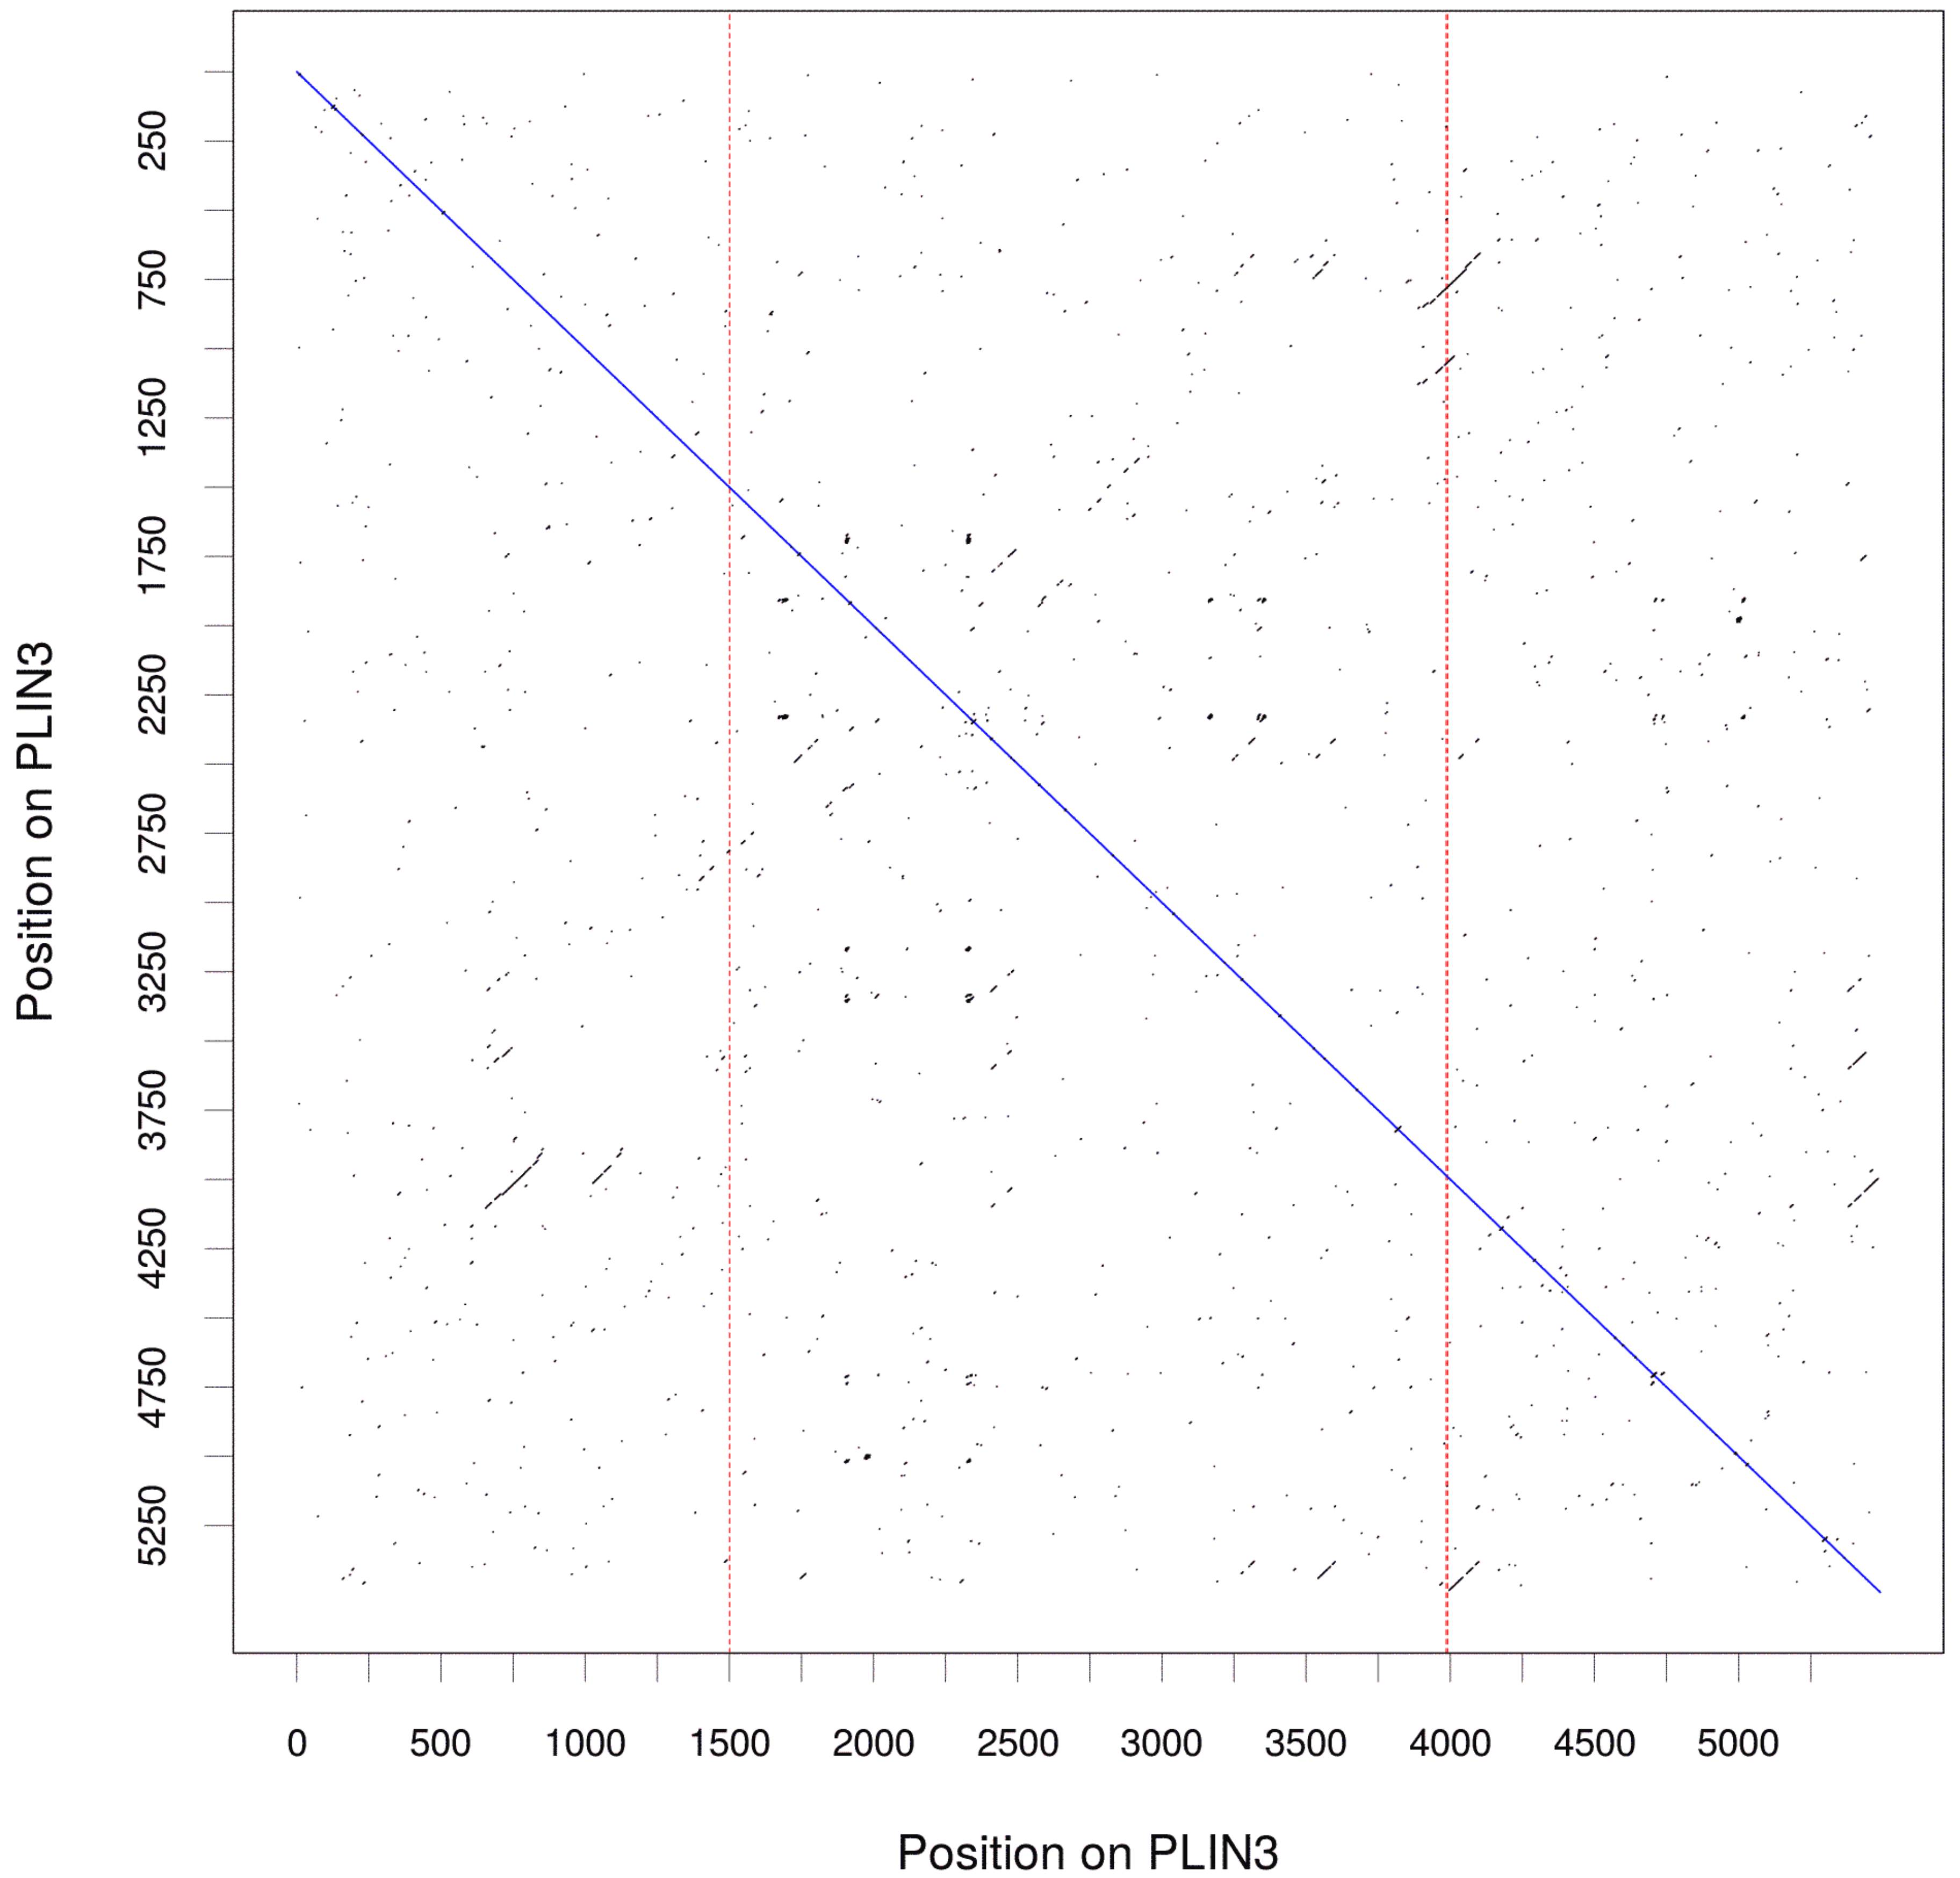

# PMPCB

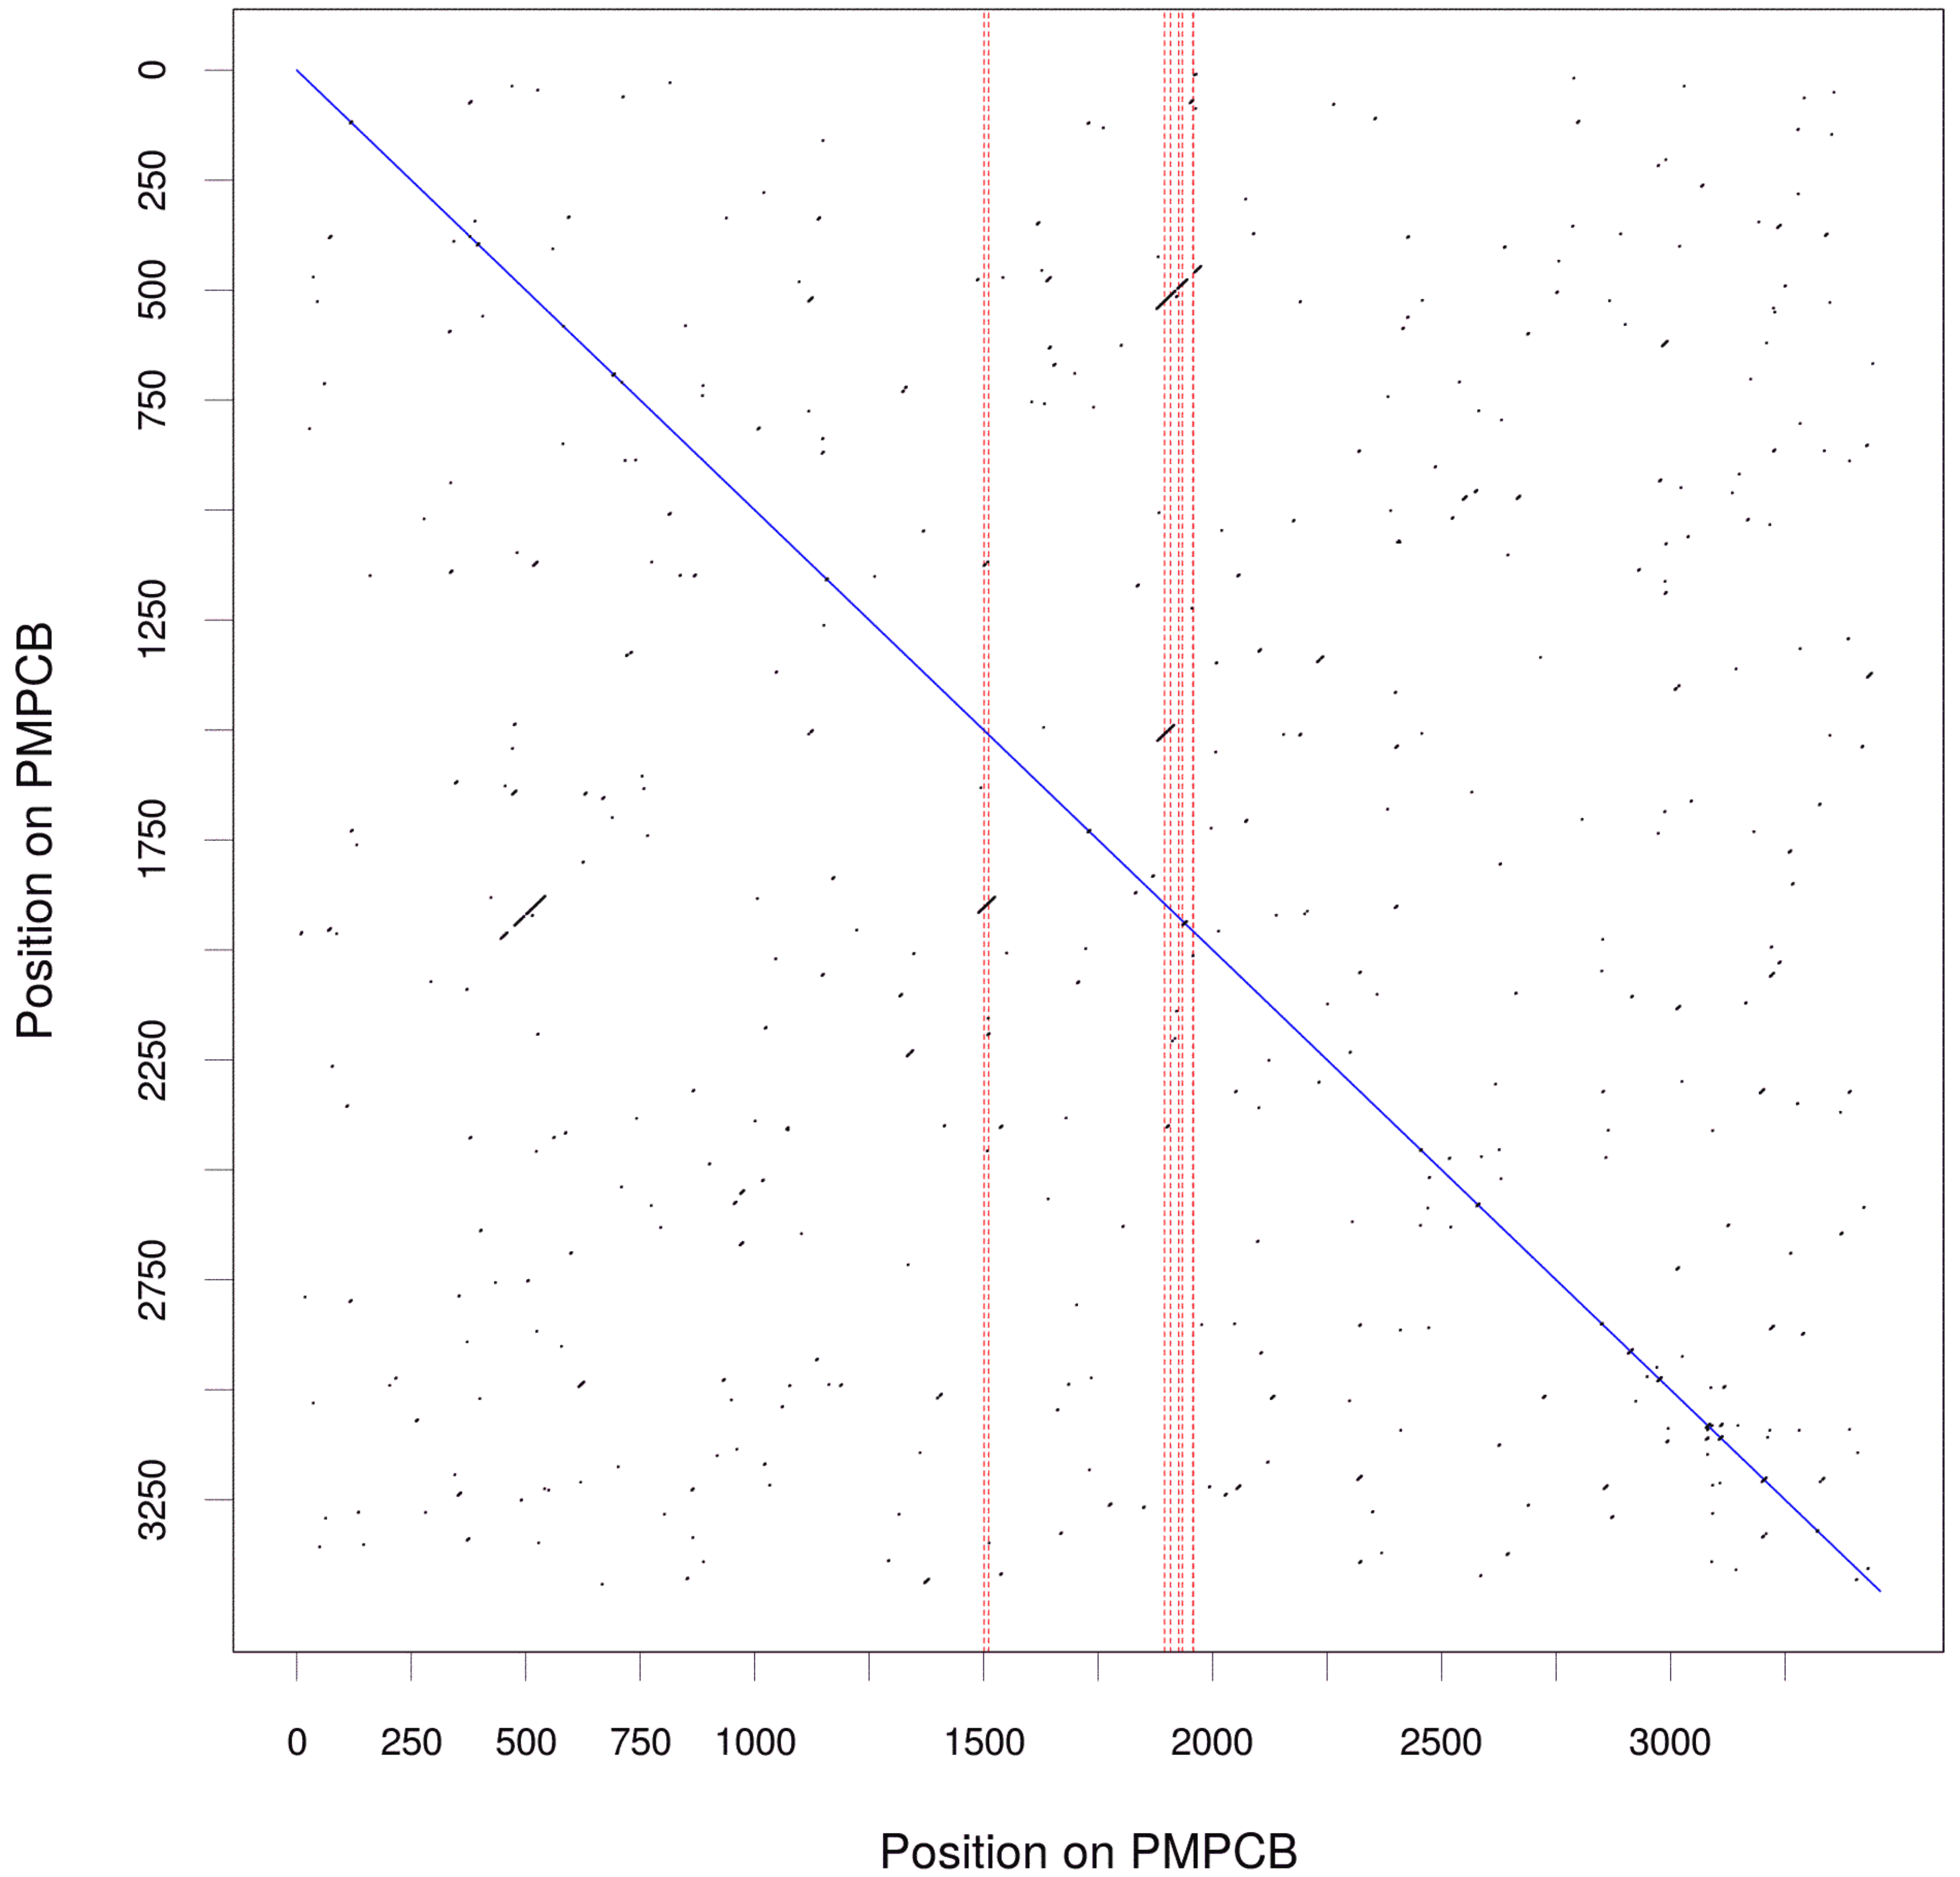

# PNPLA3

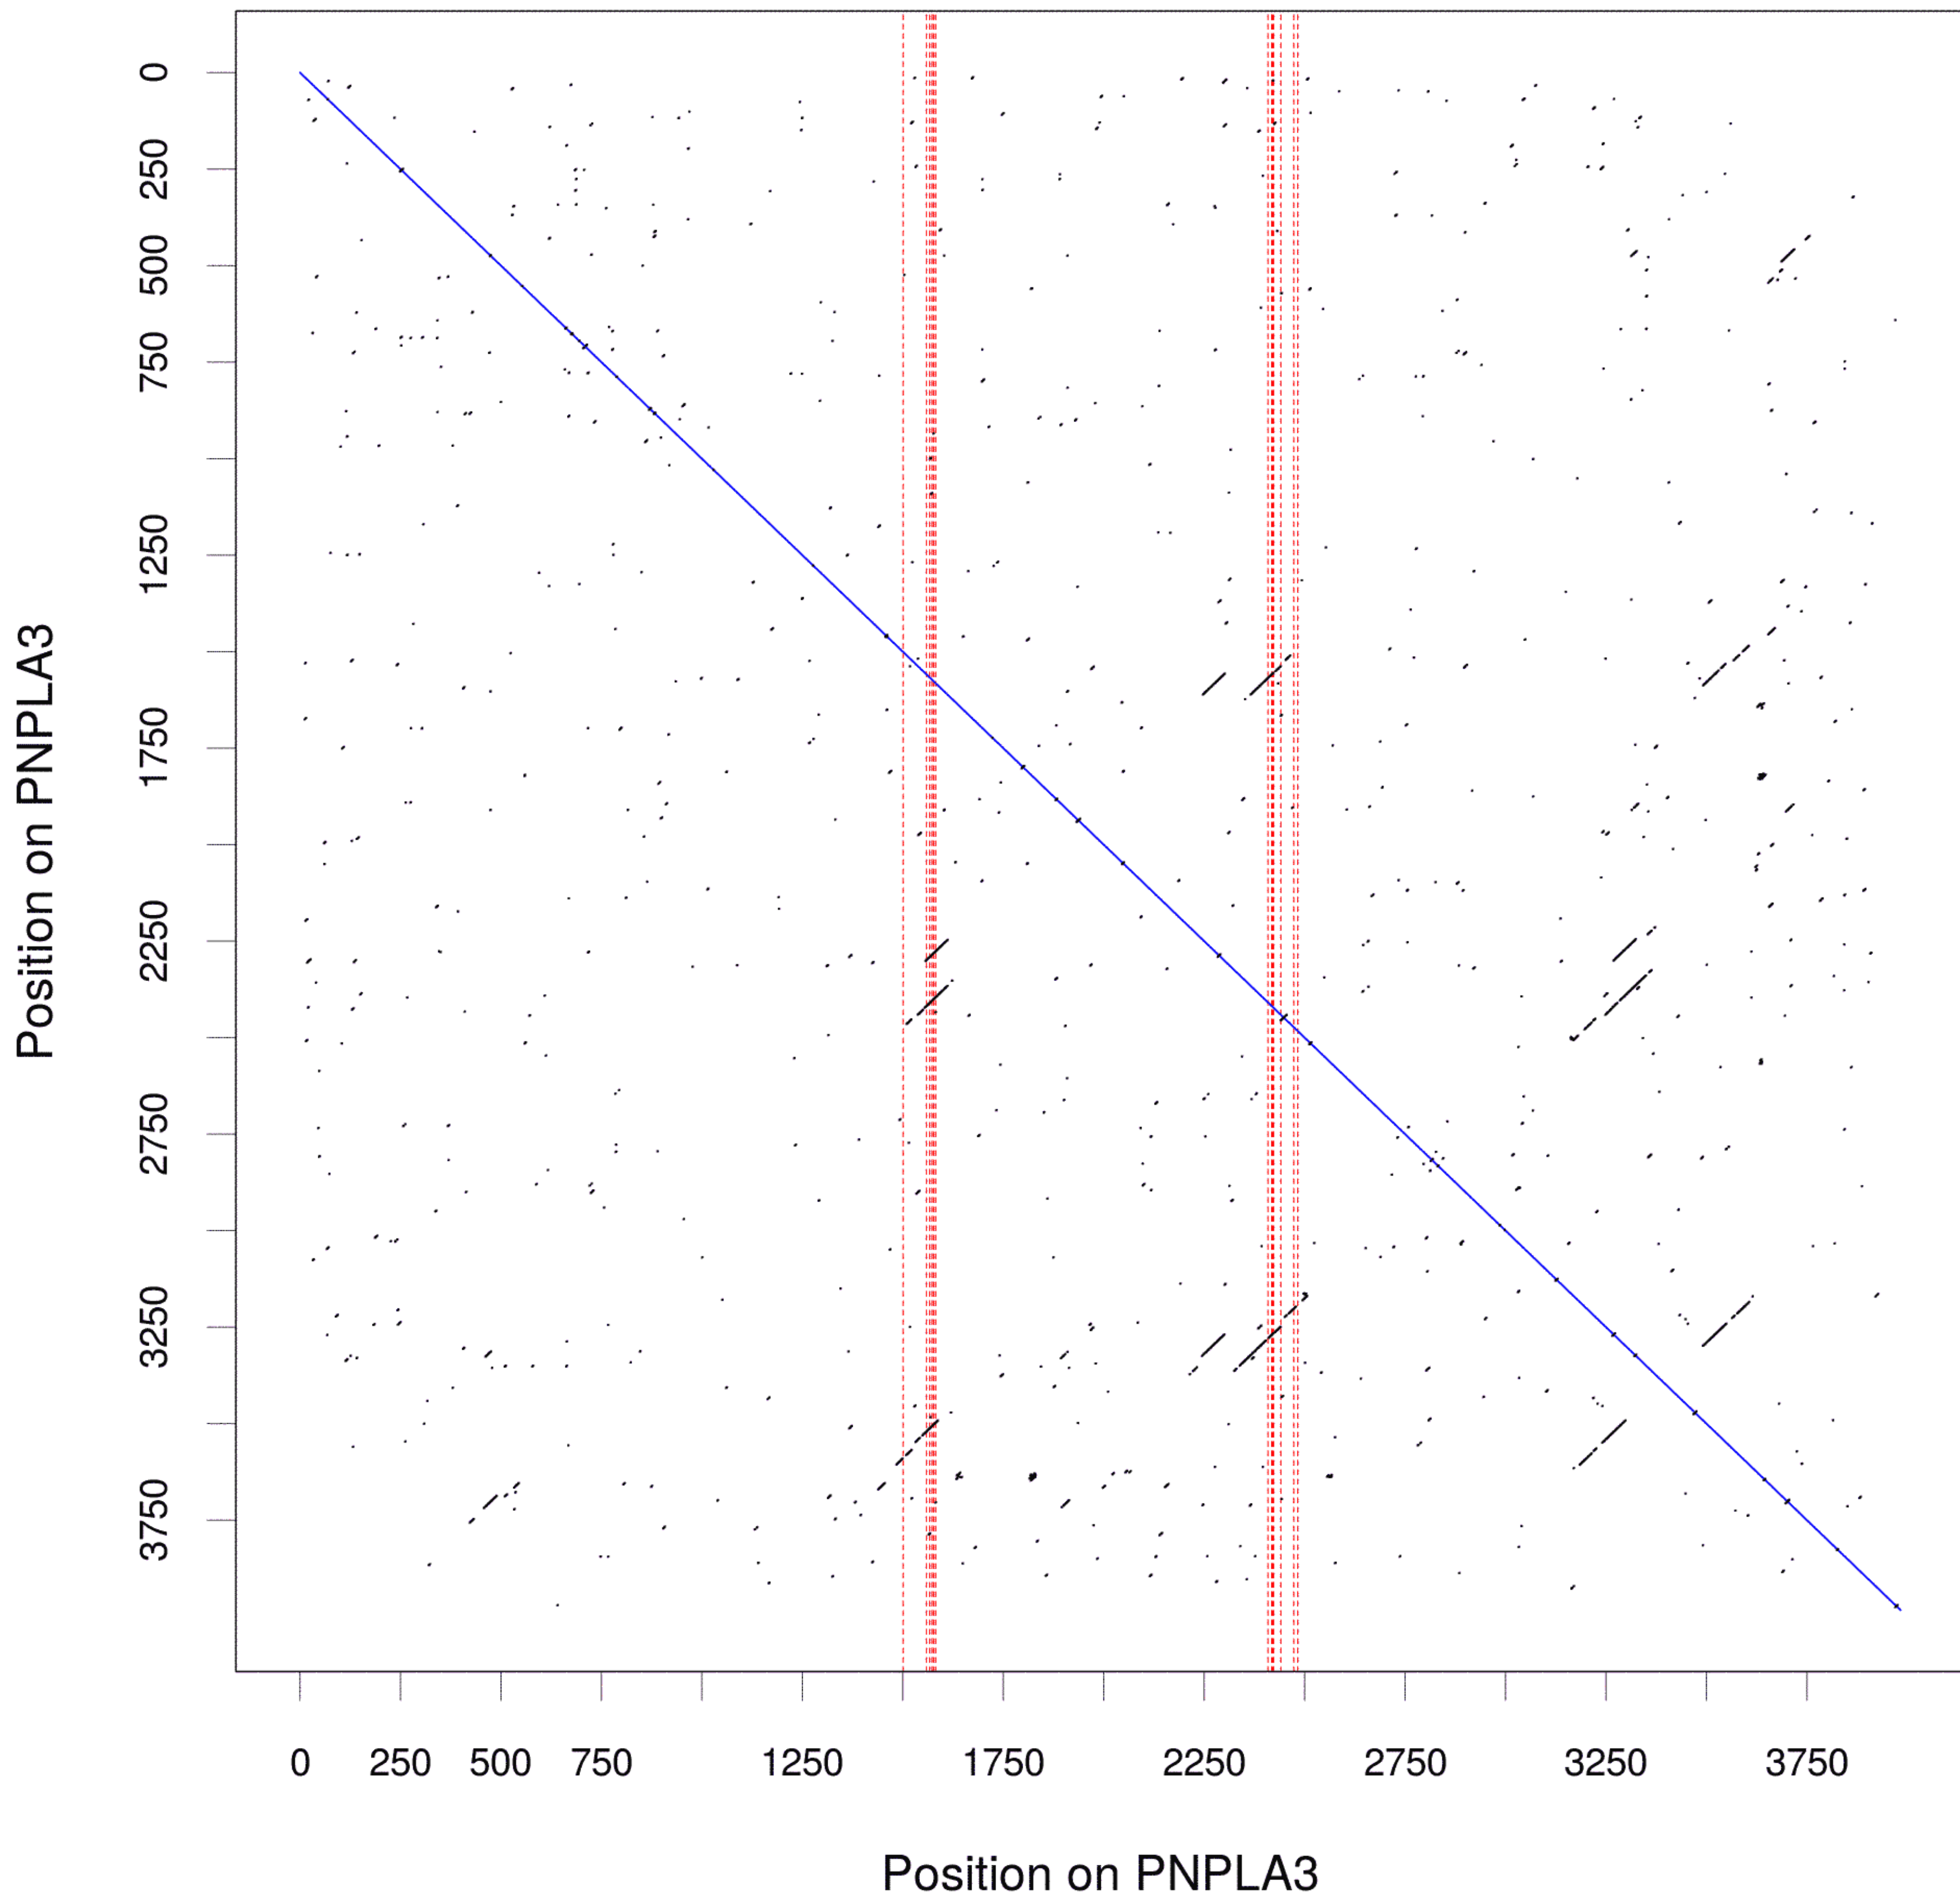

# PODNL1

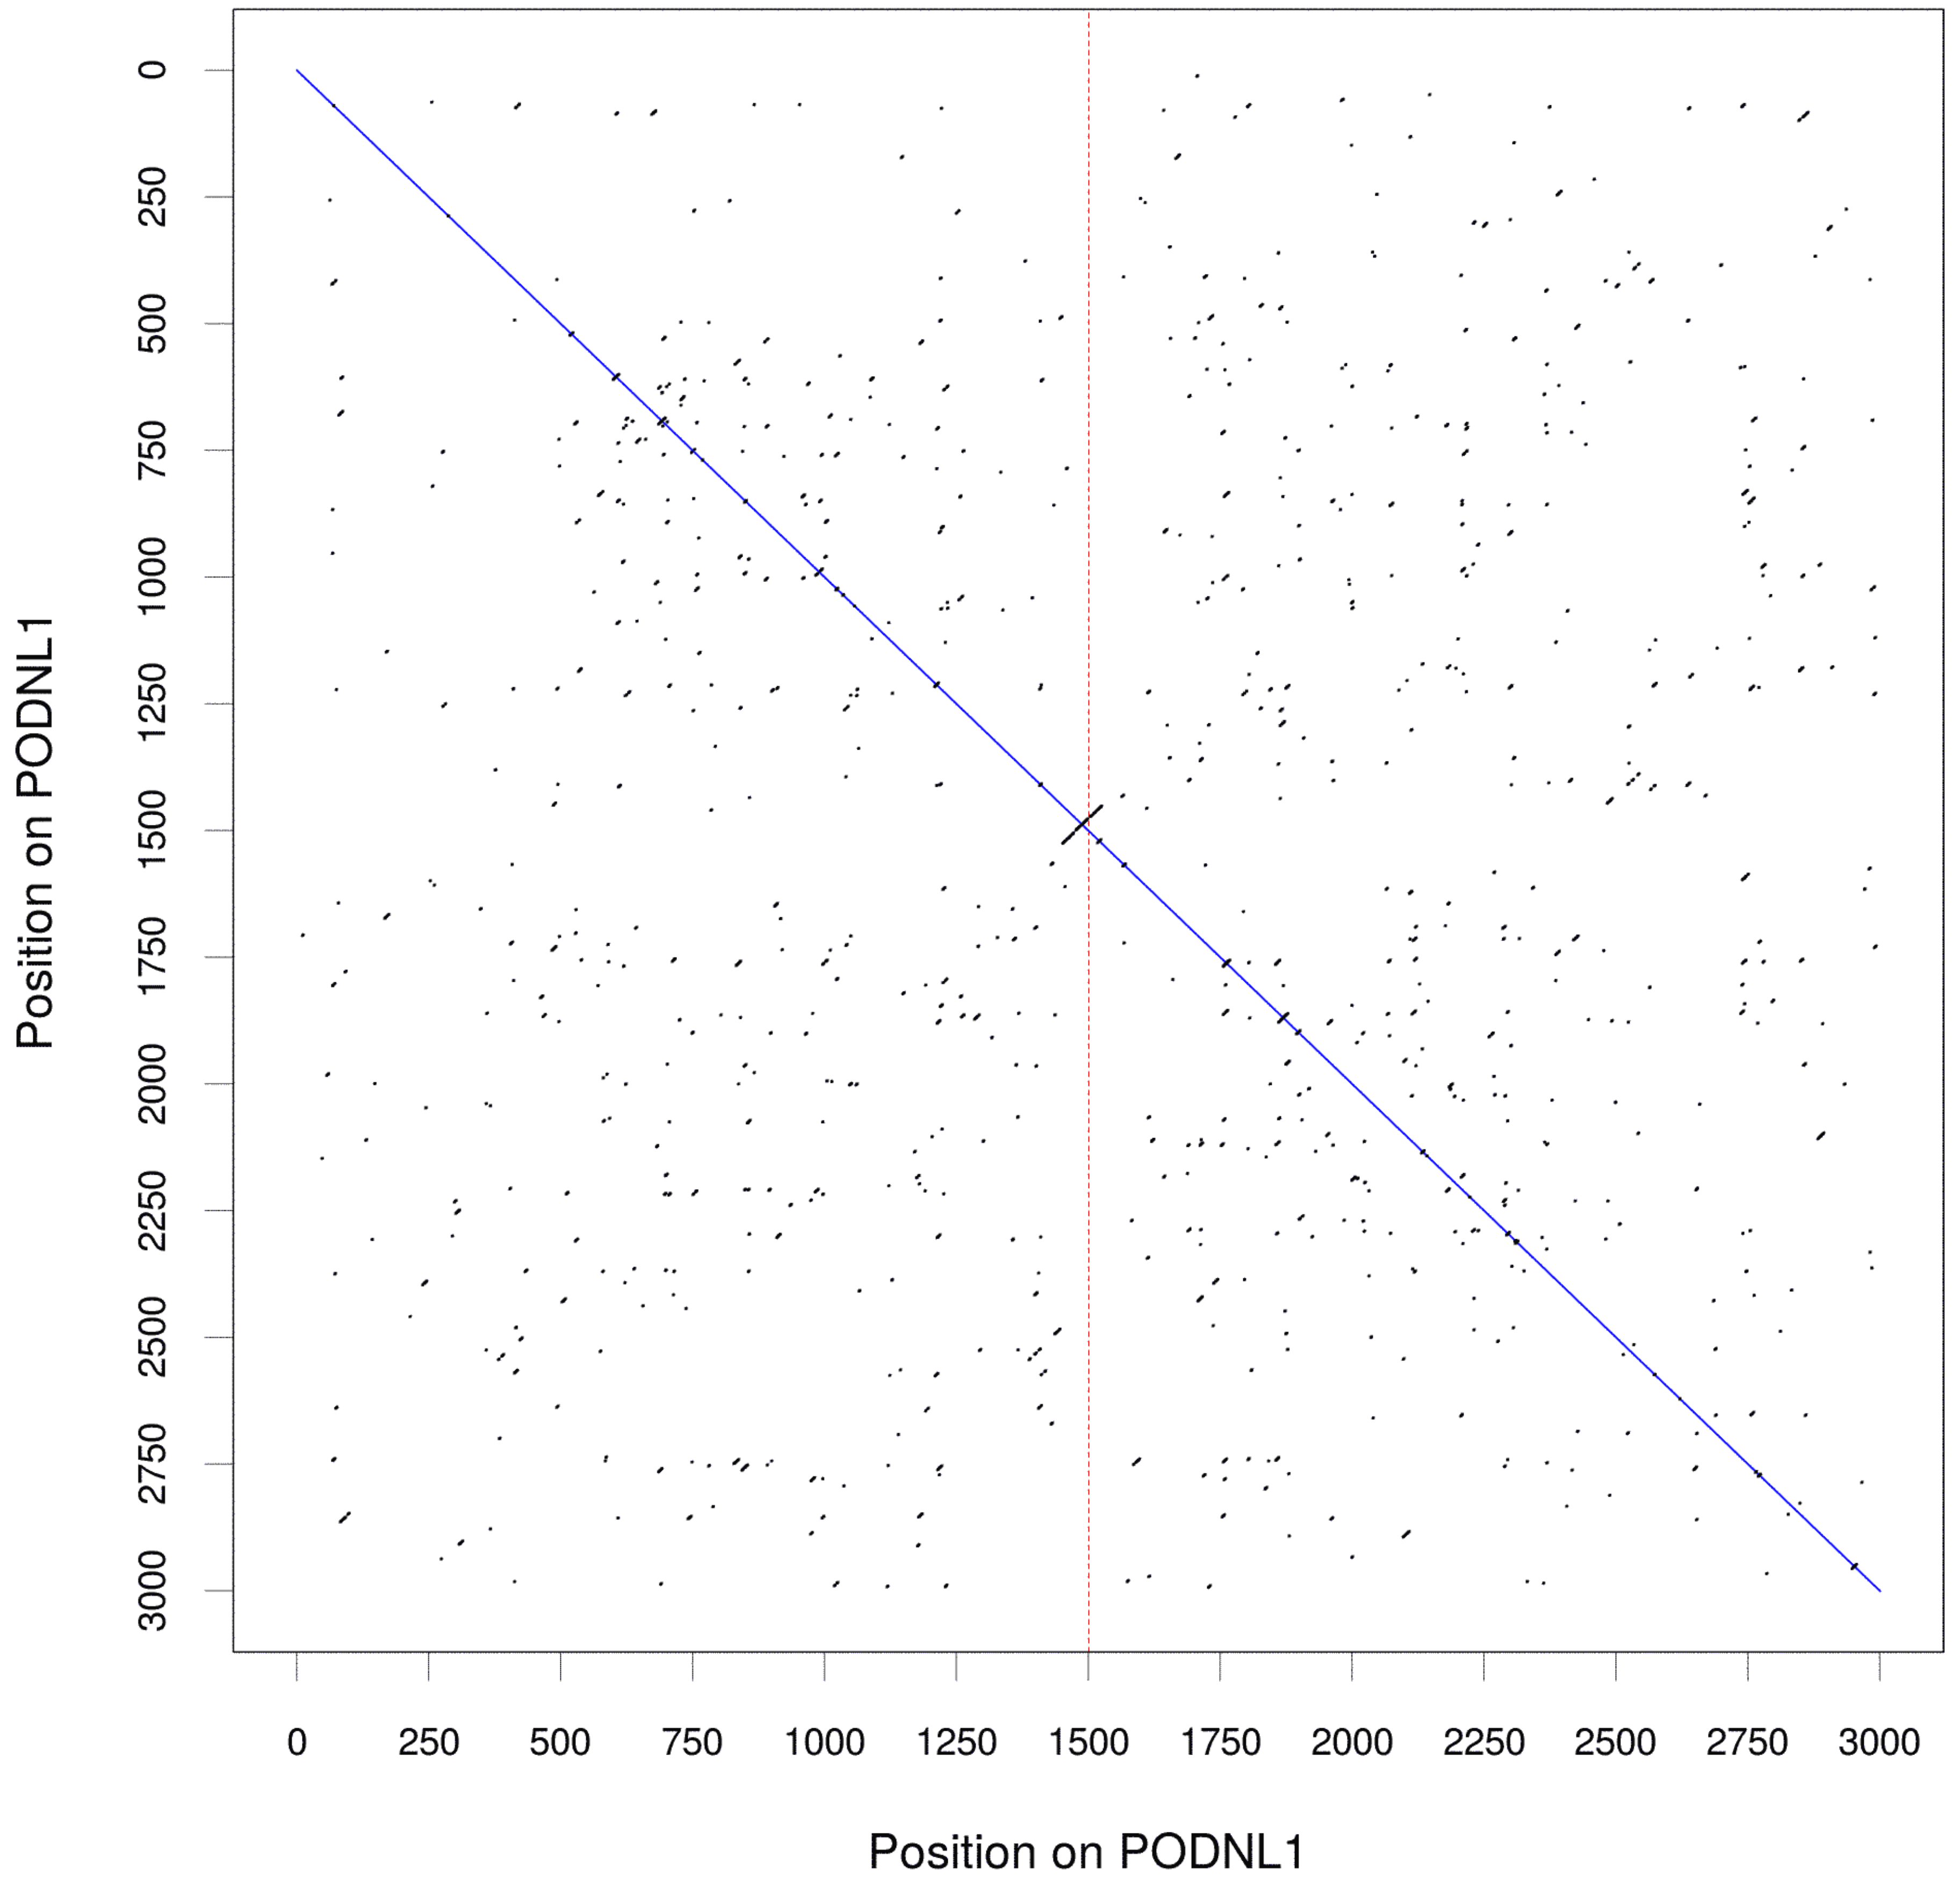

# POLI

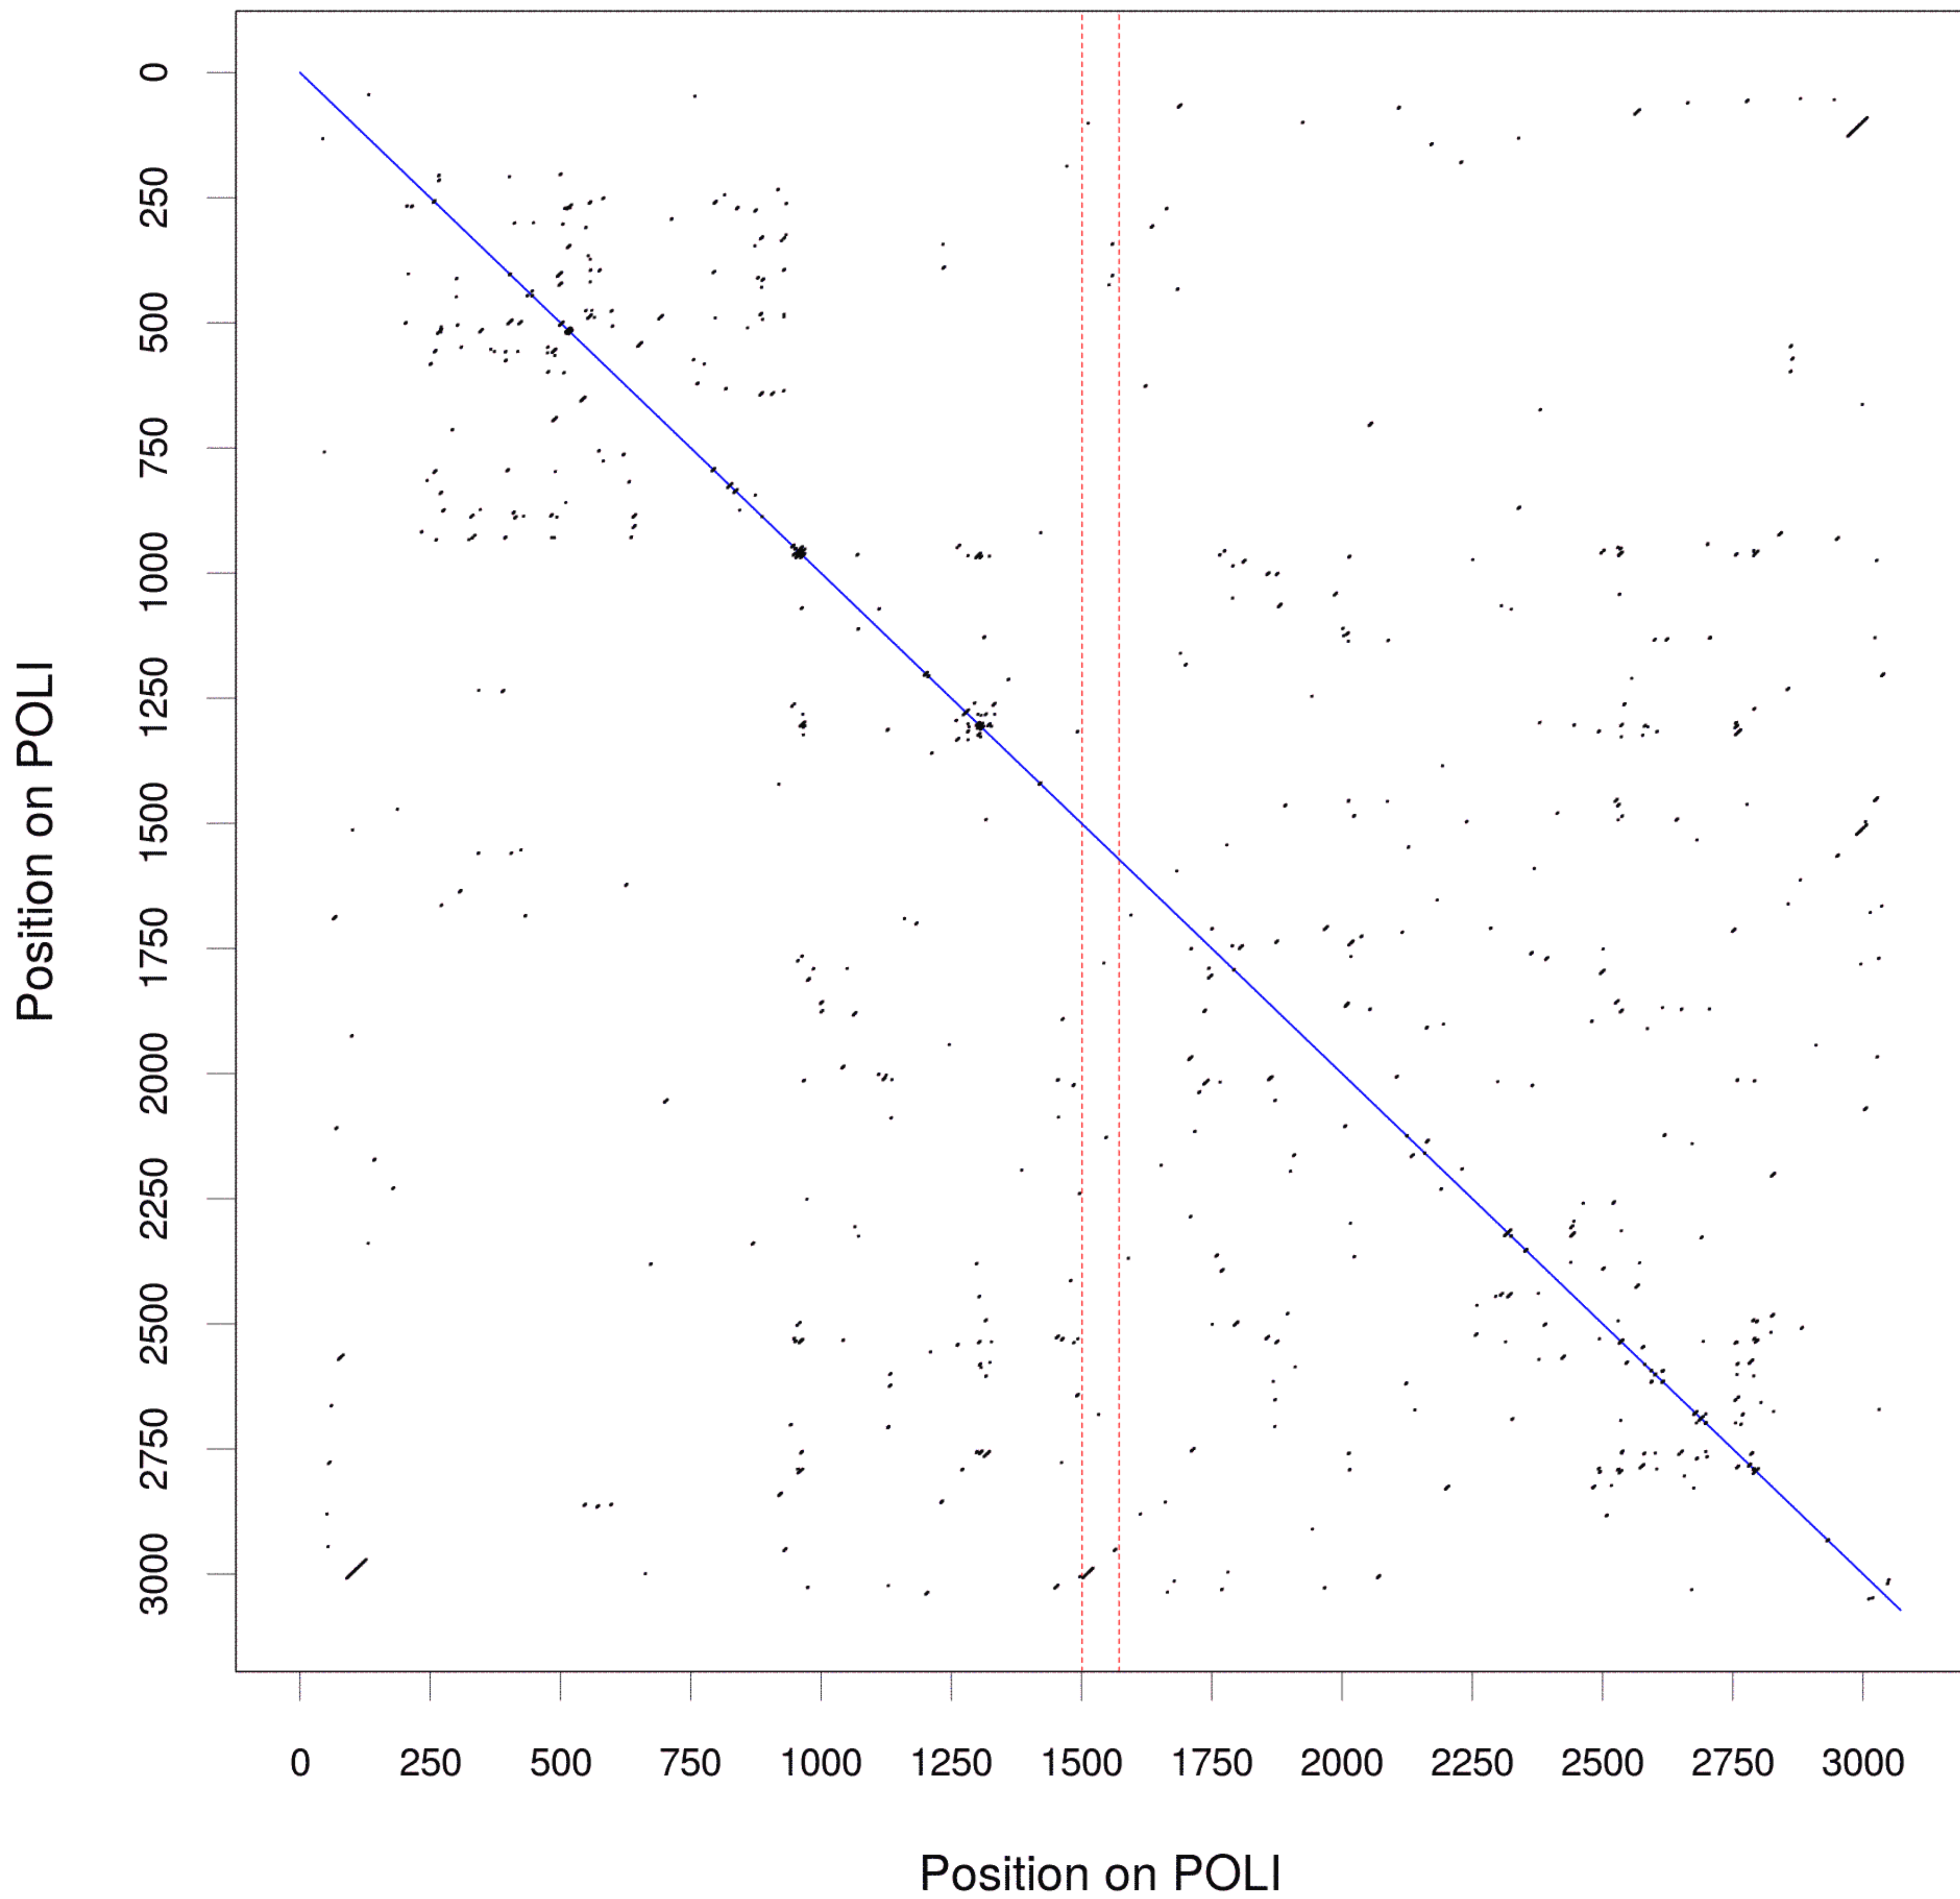

# PPAT

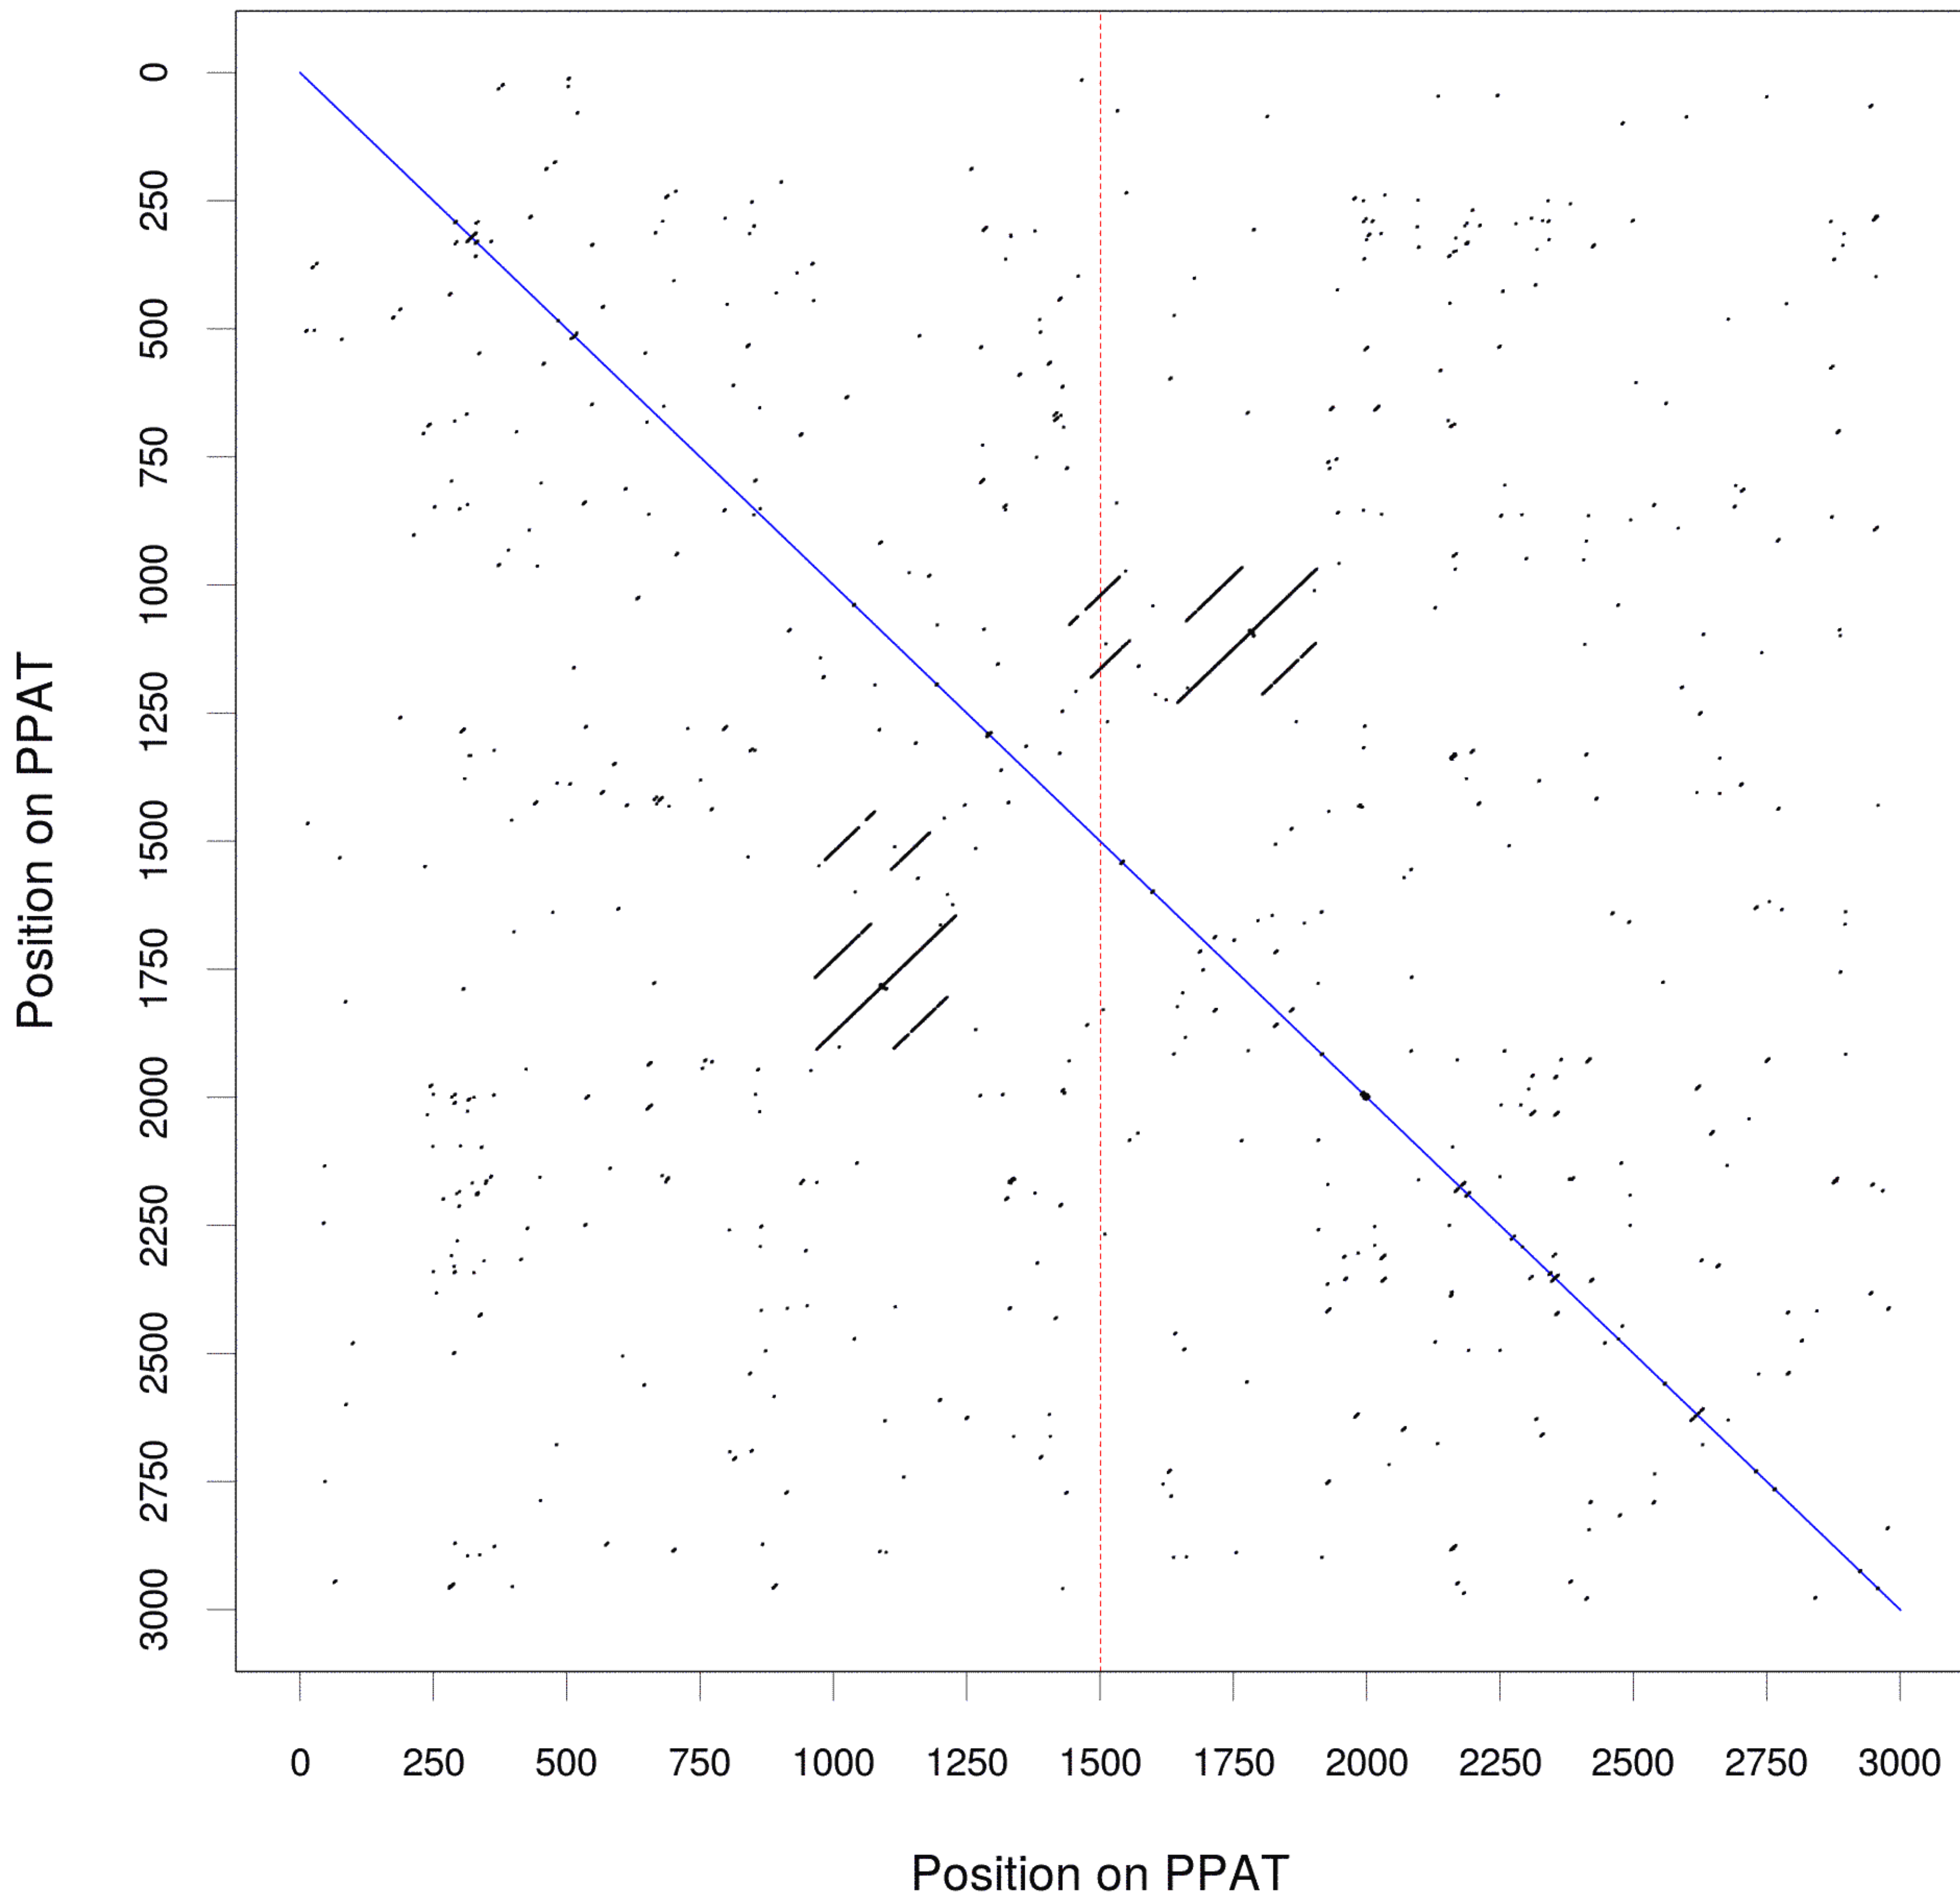

# PPT2

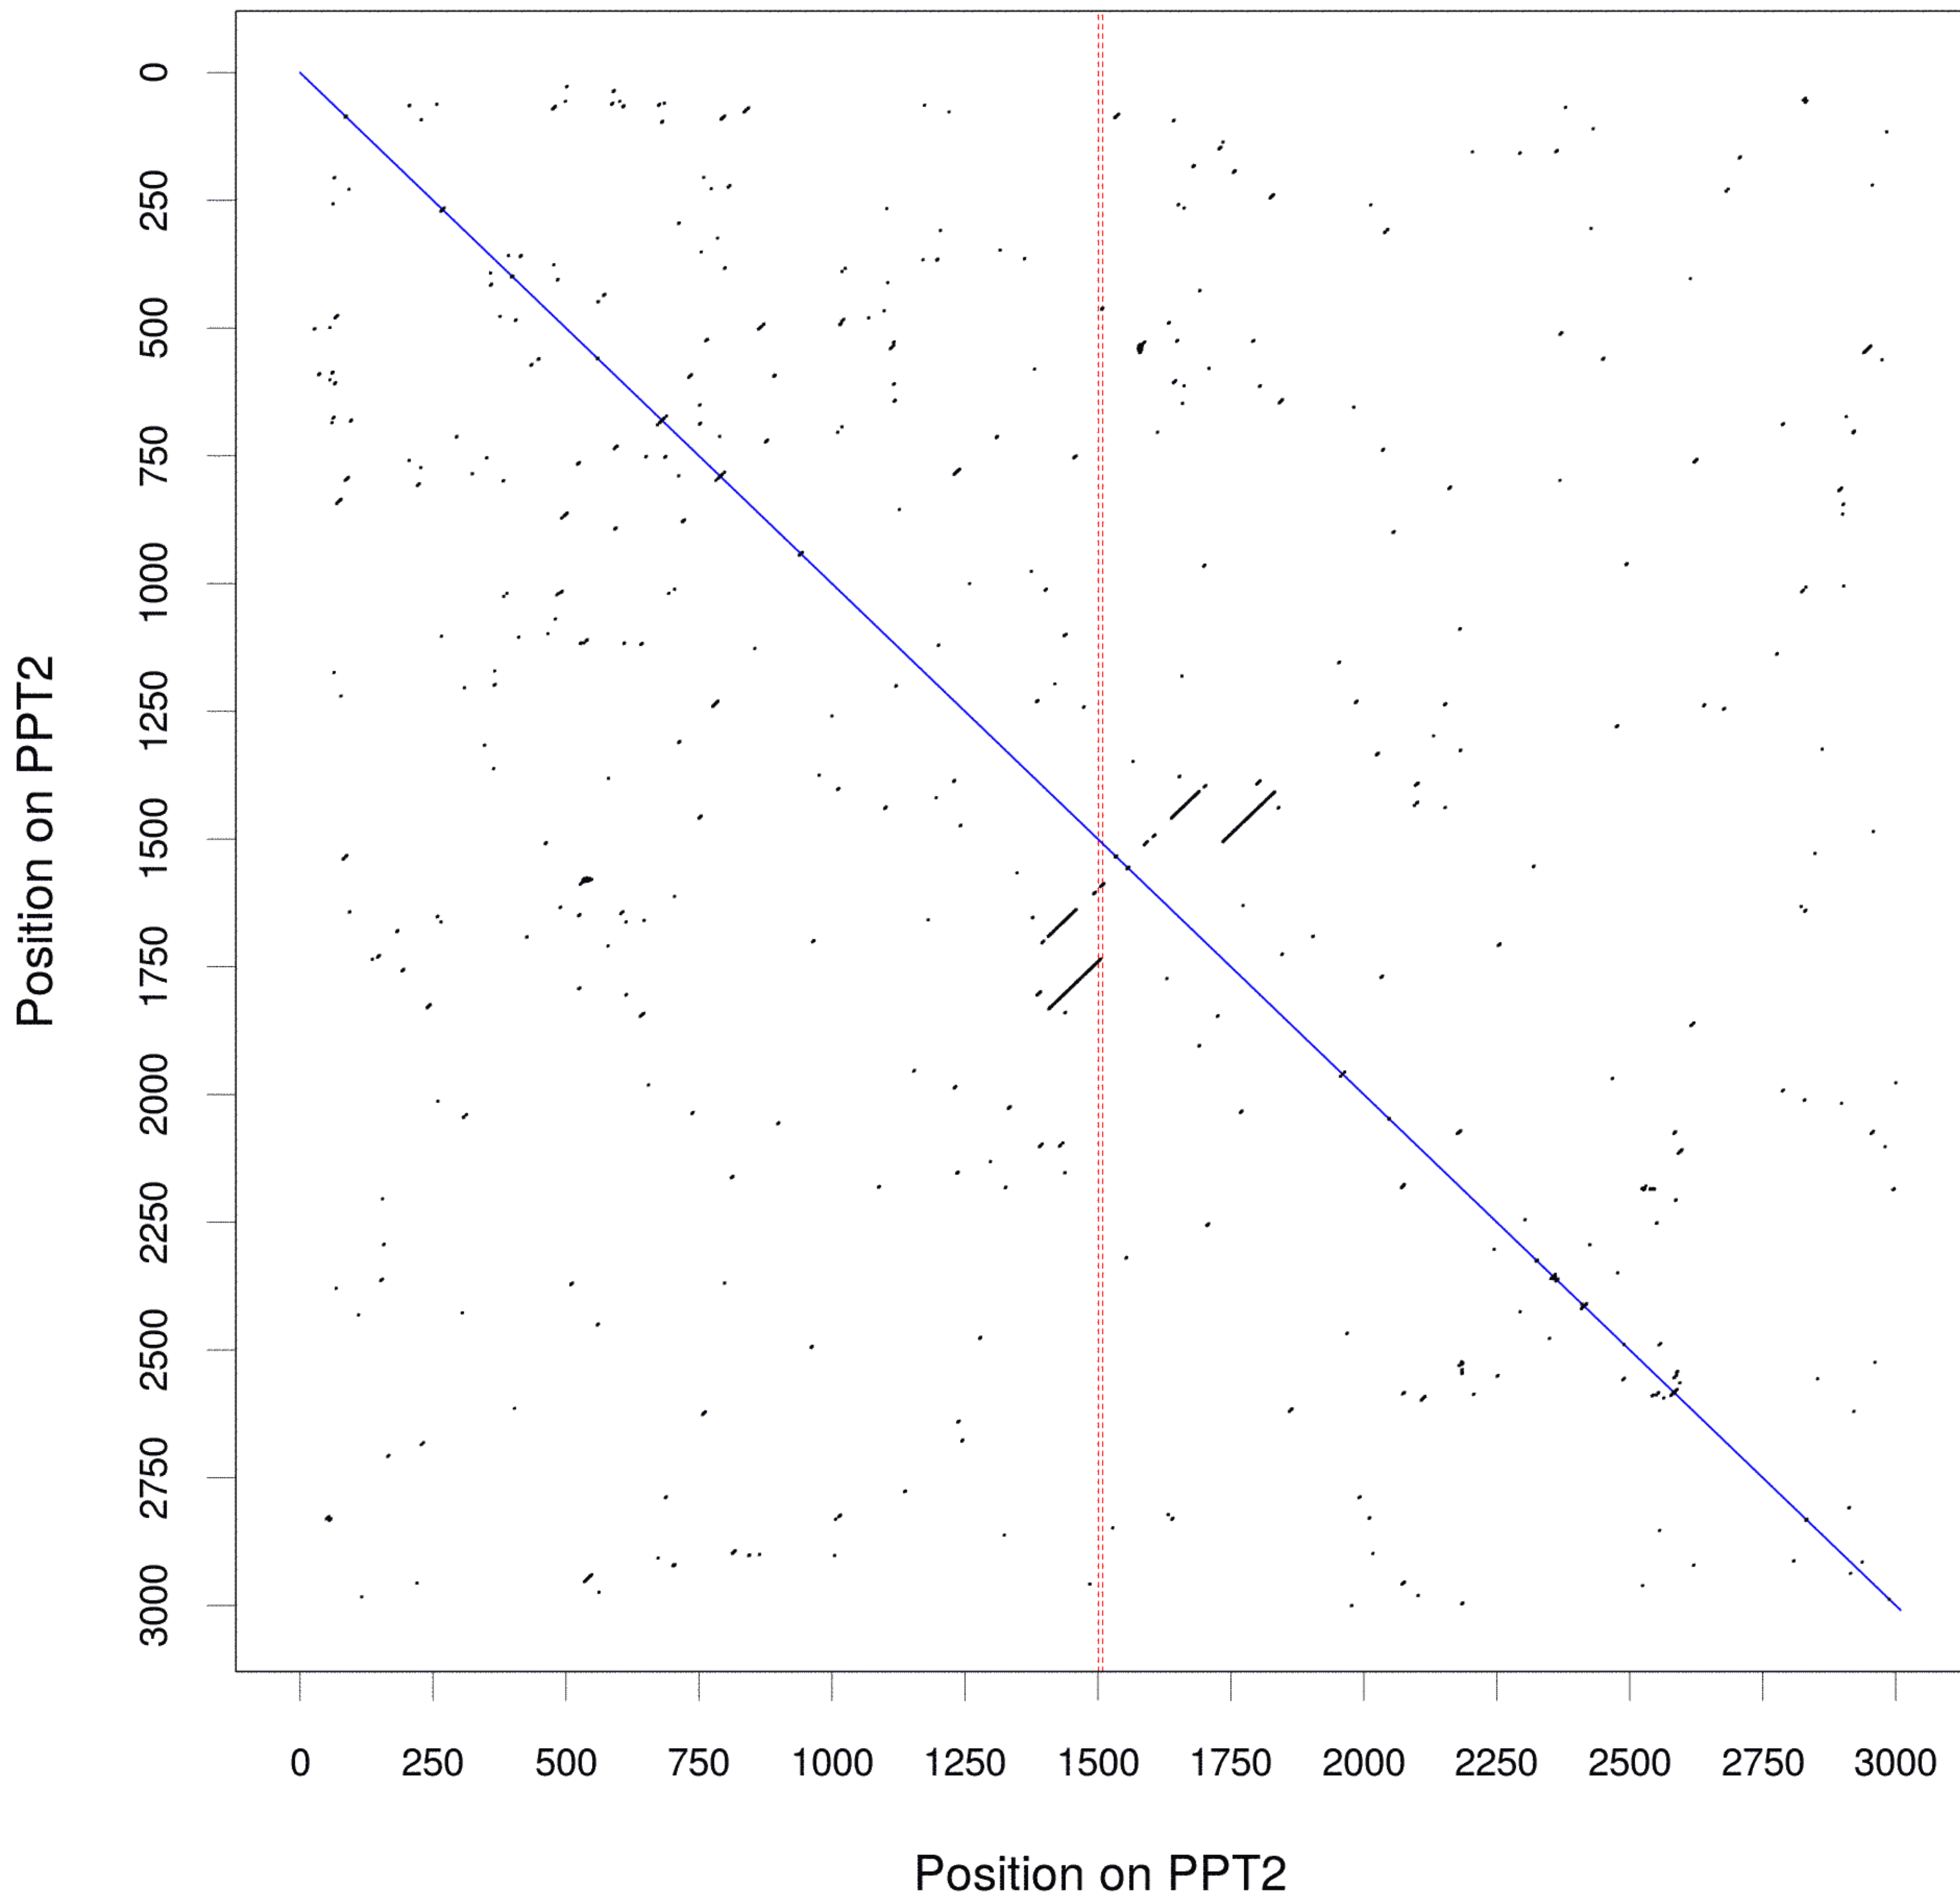



# PSAT1

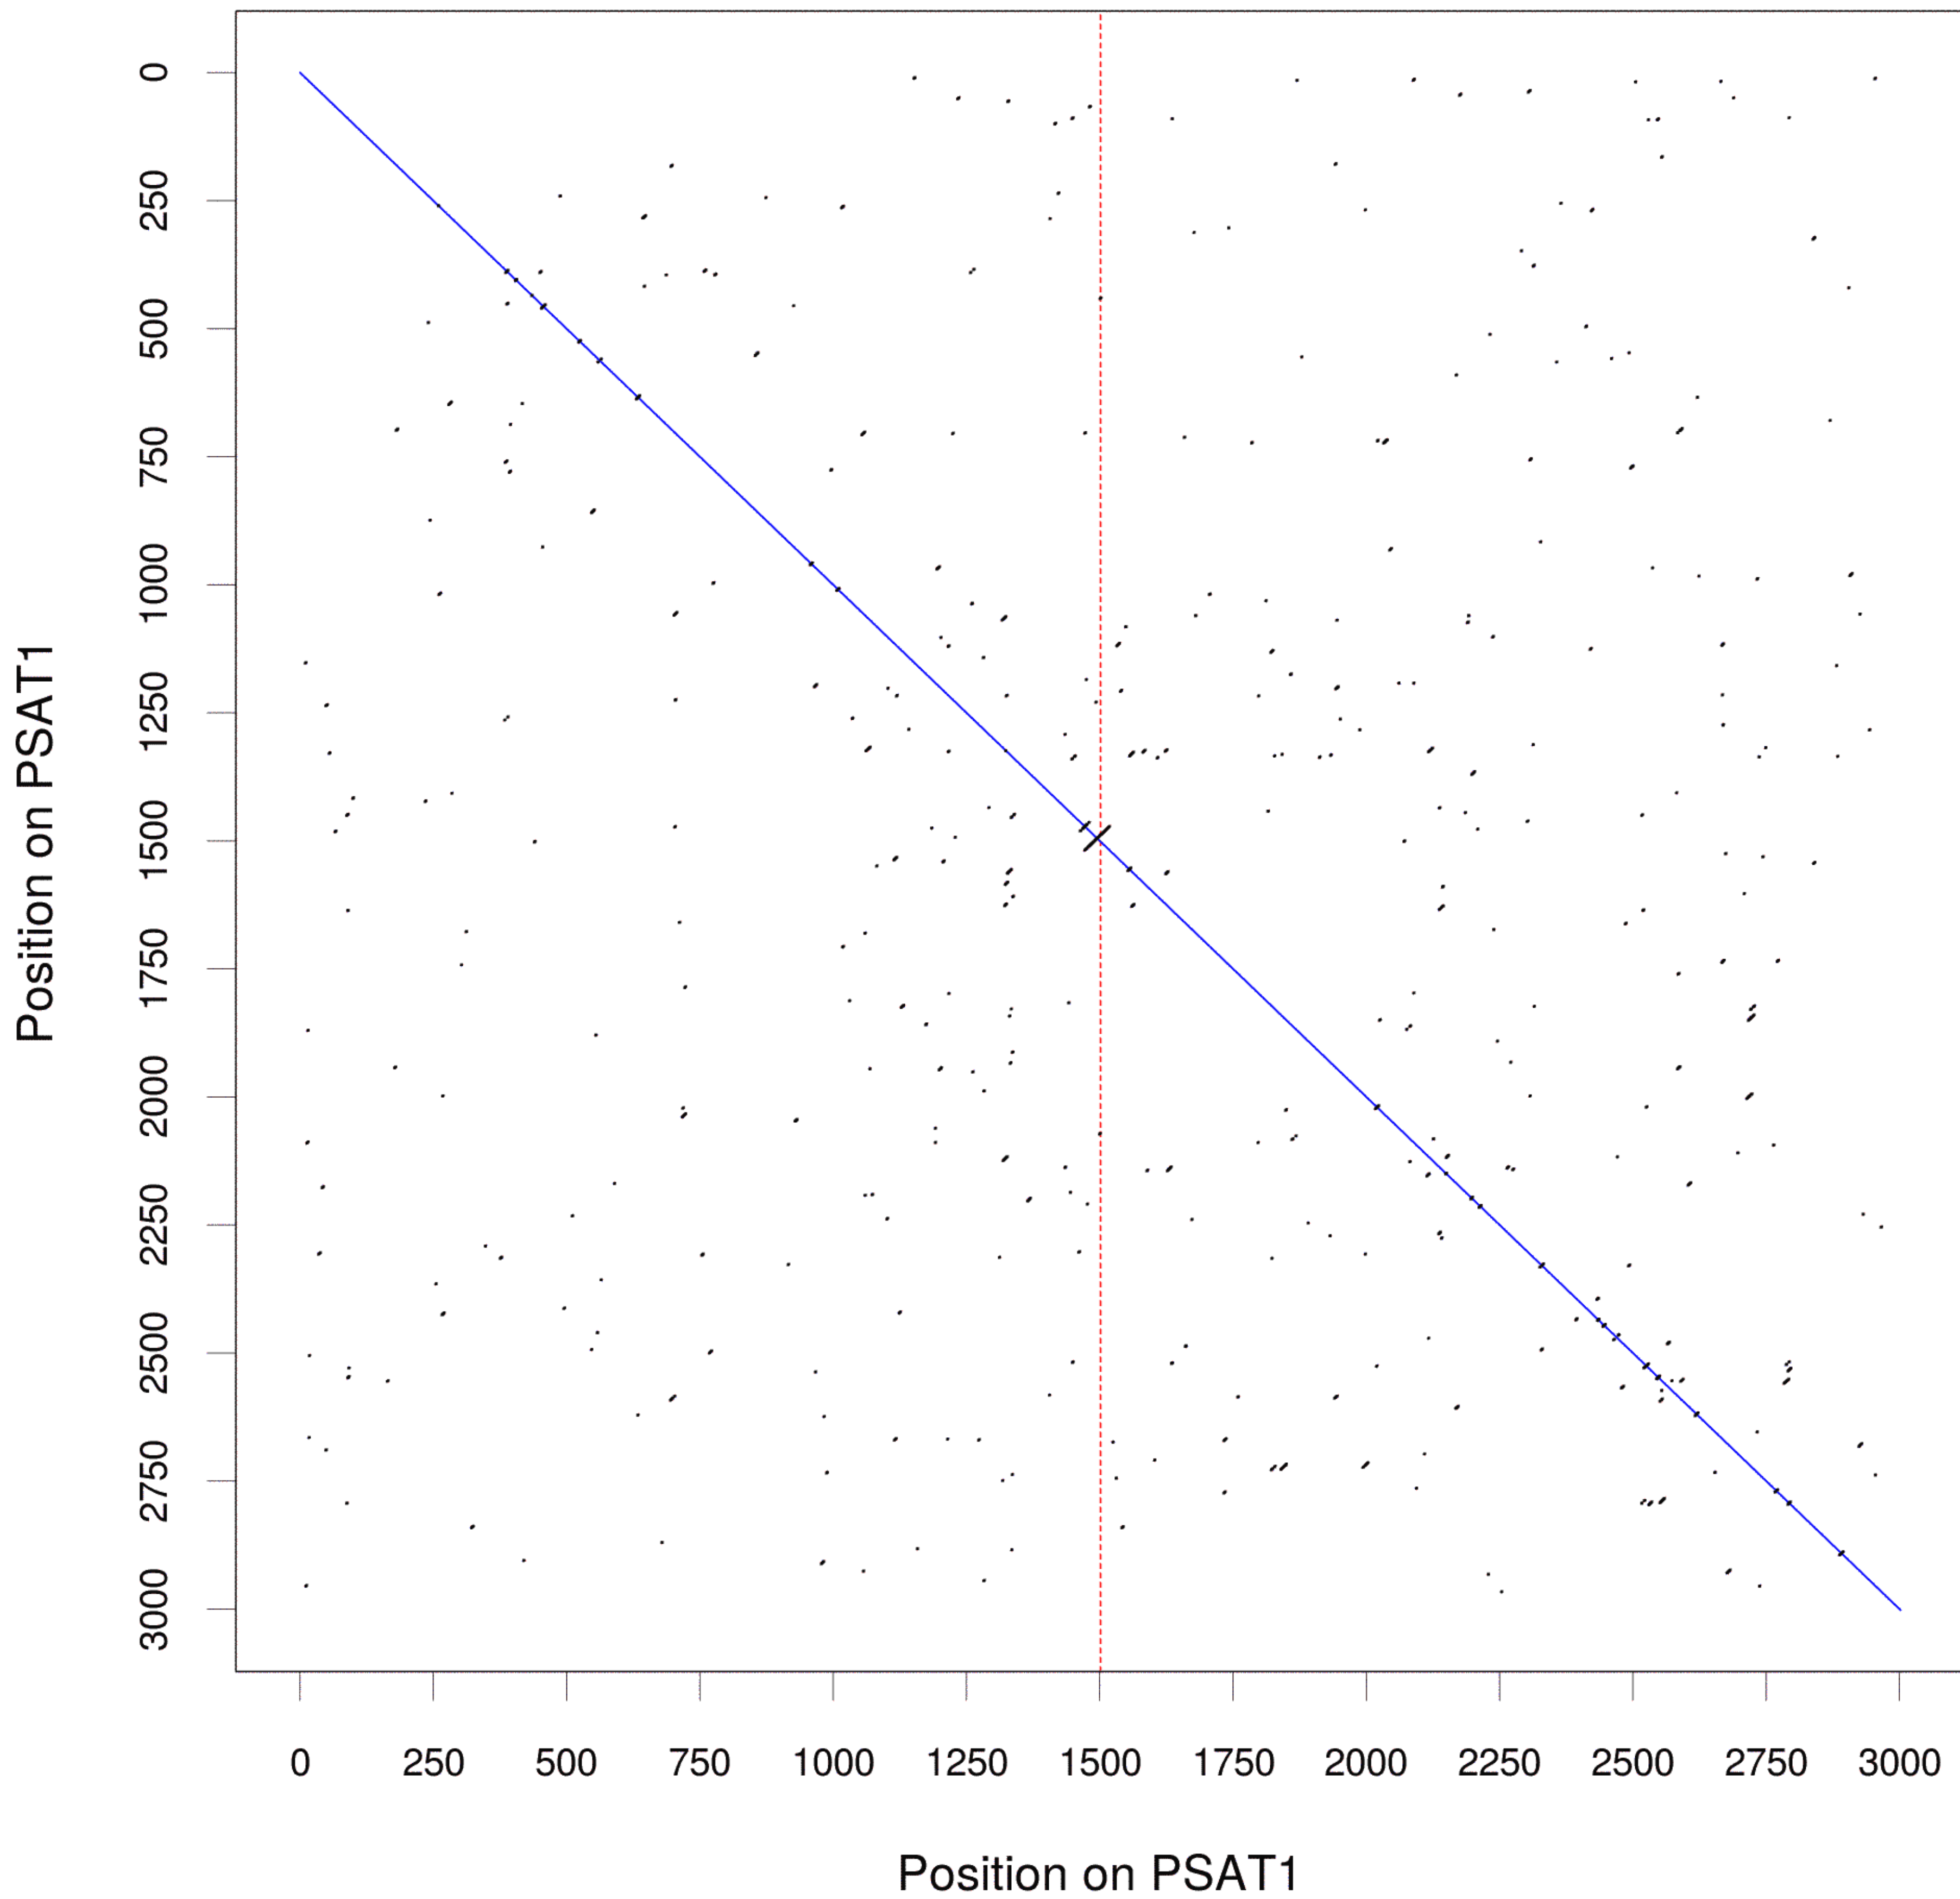

# PSPC1

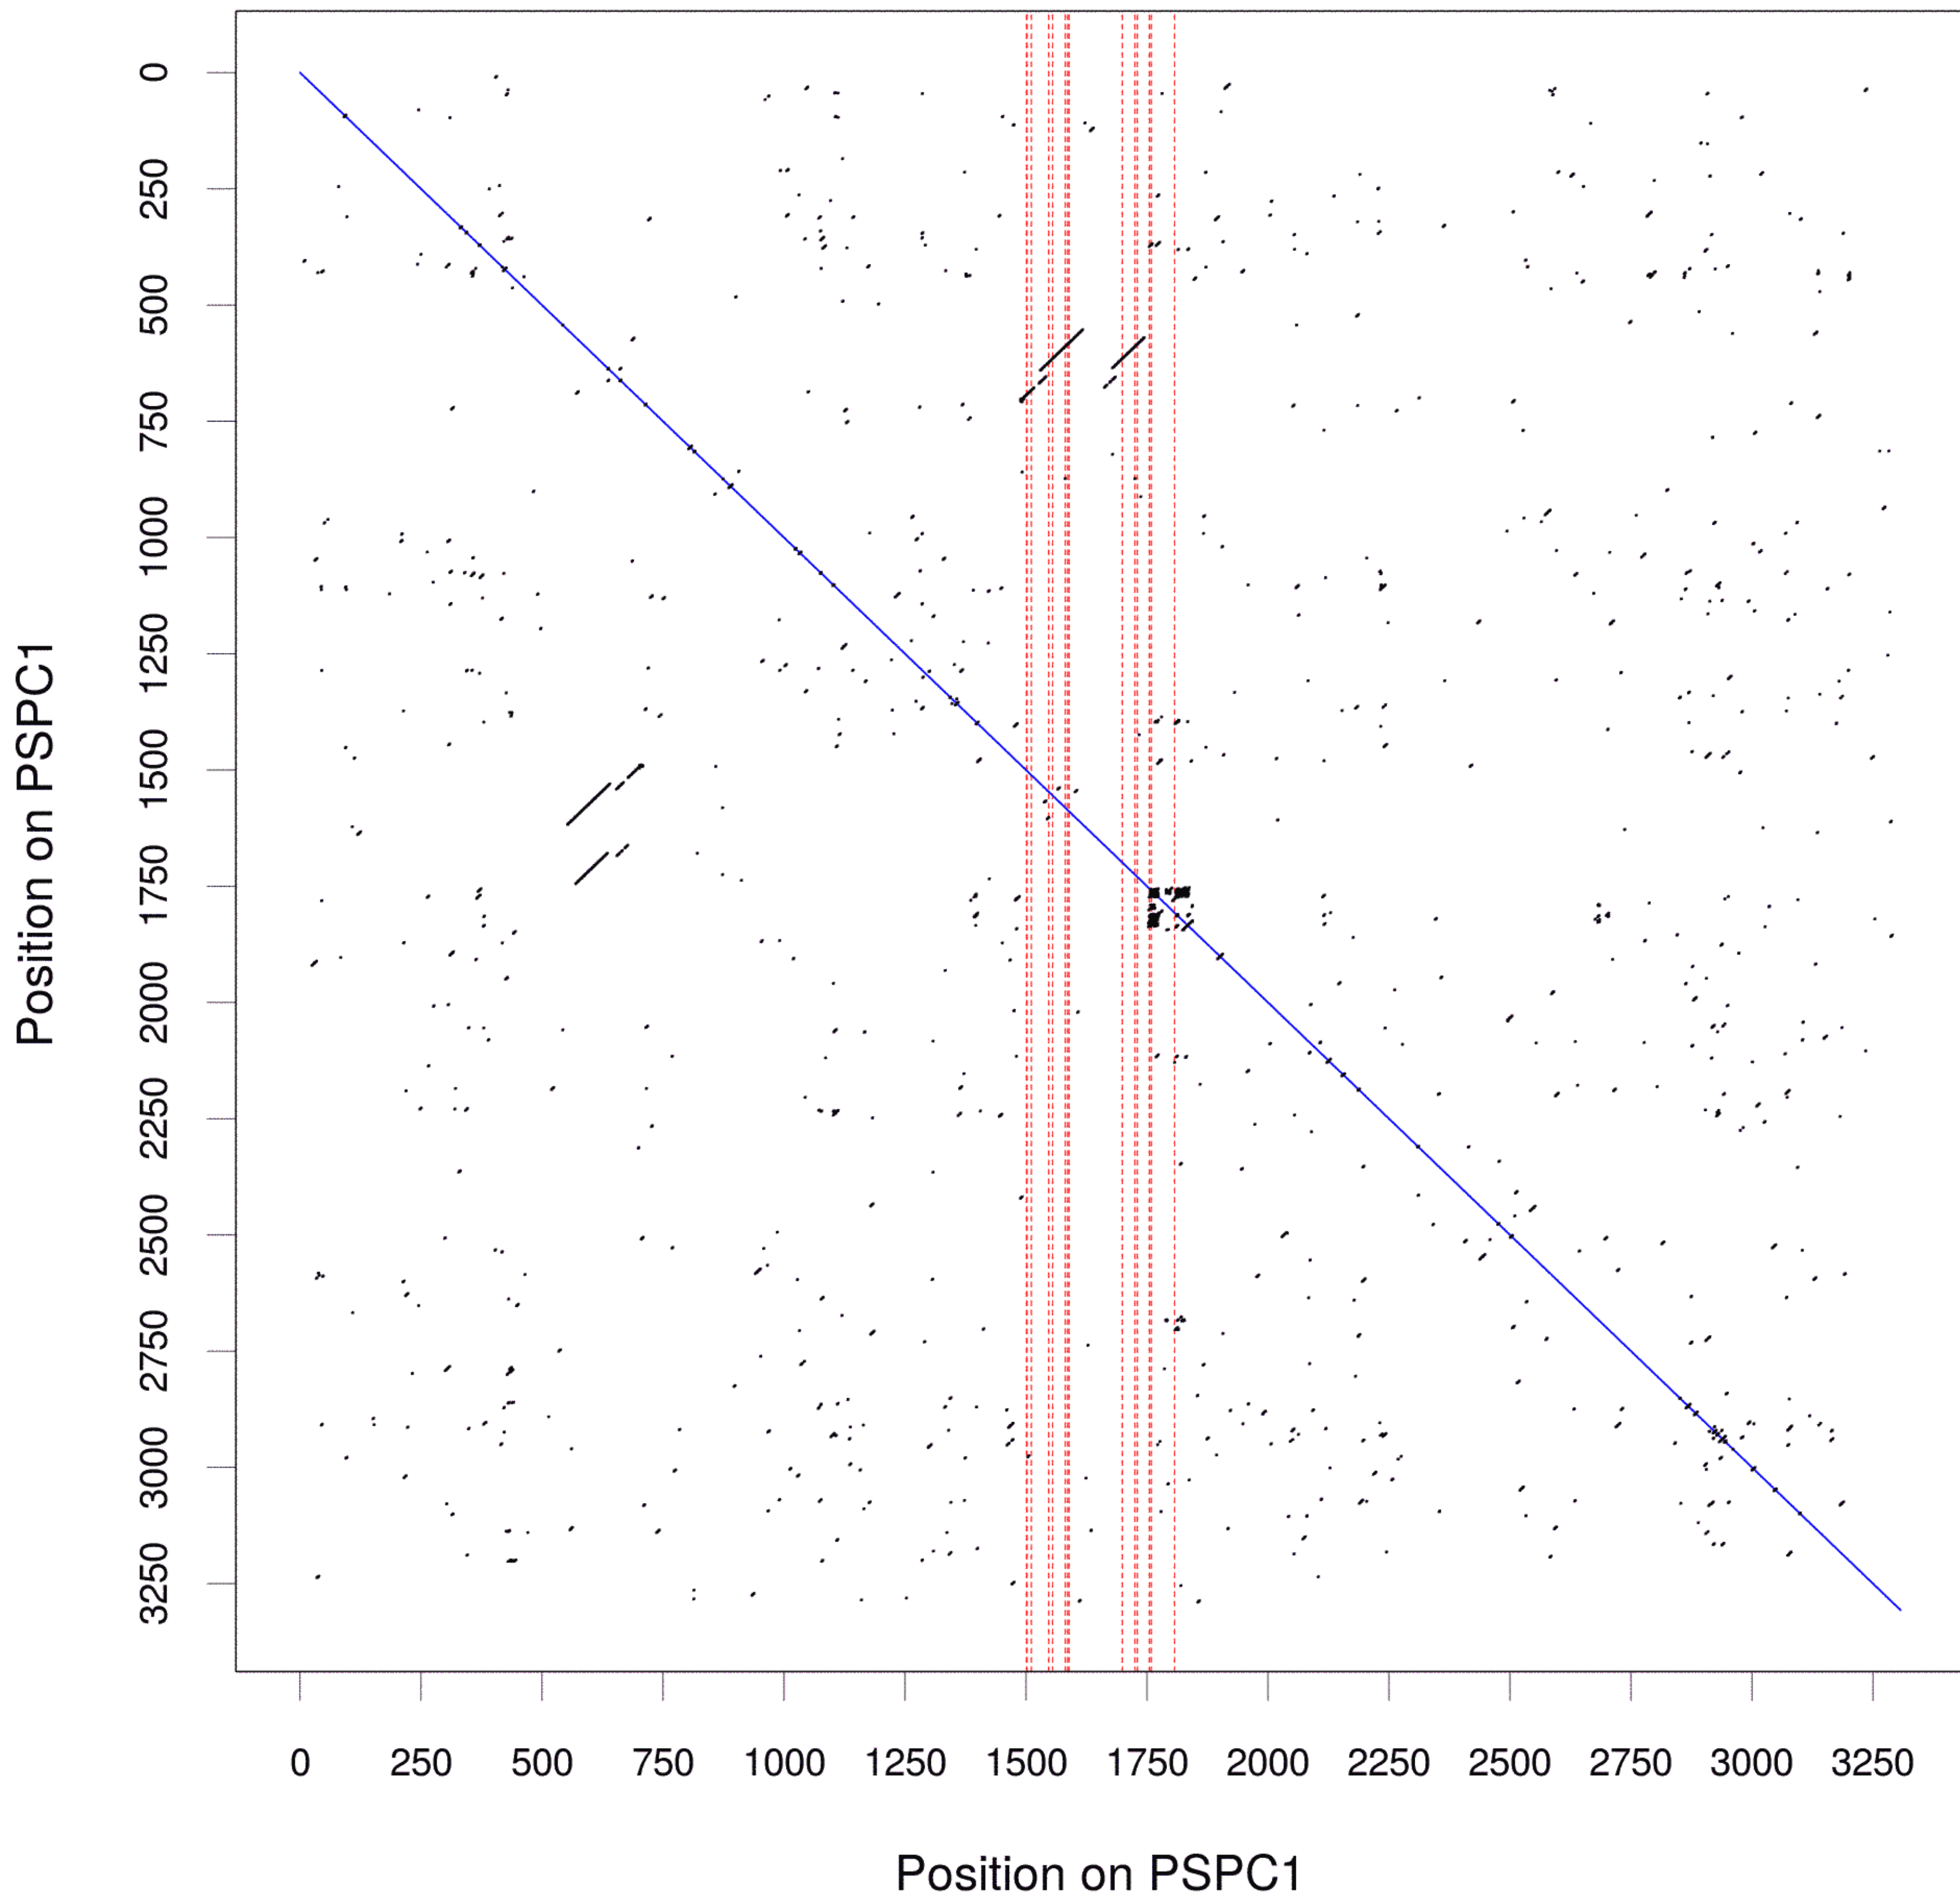

# PTK2B

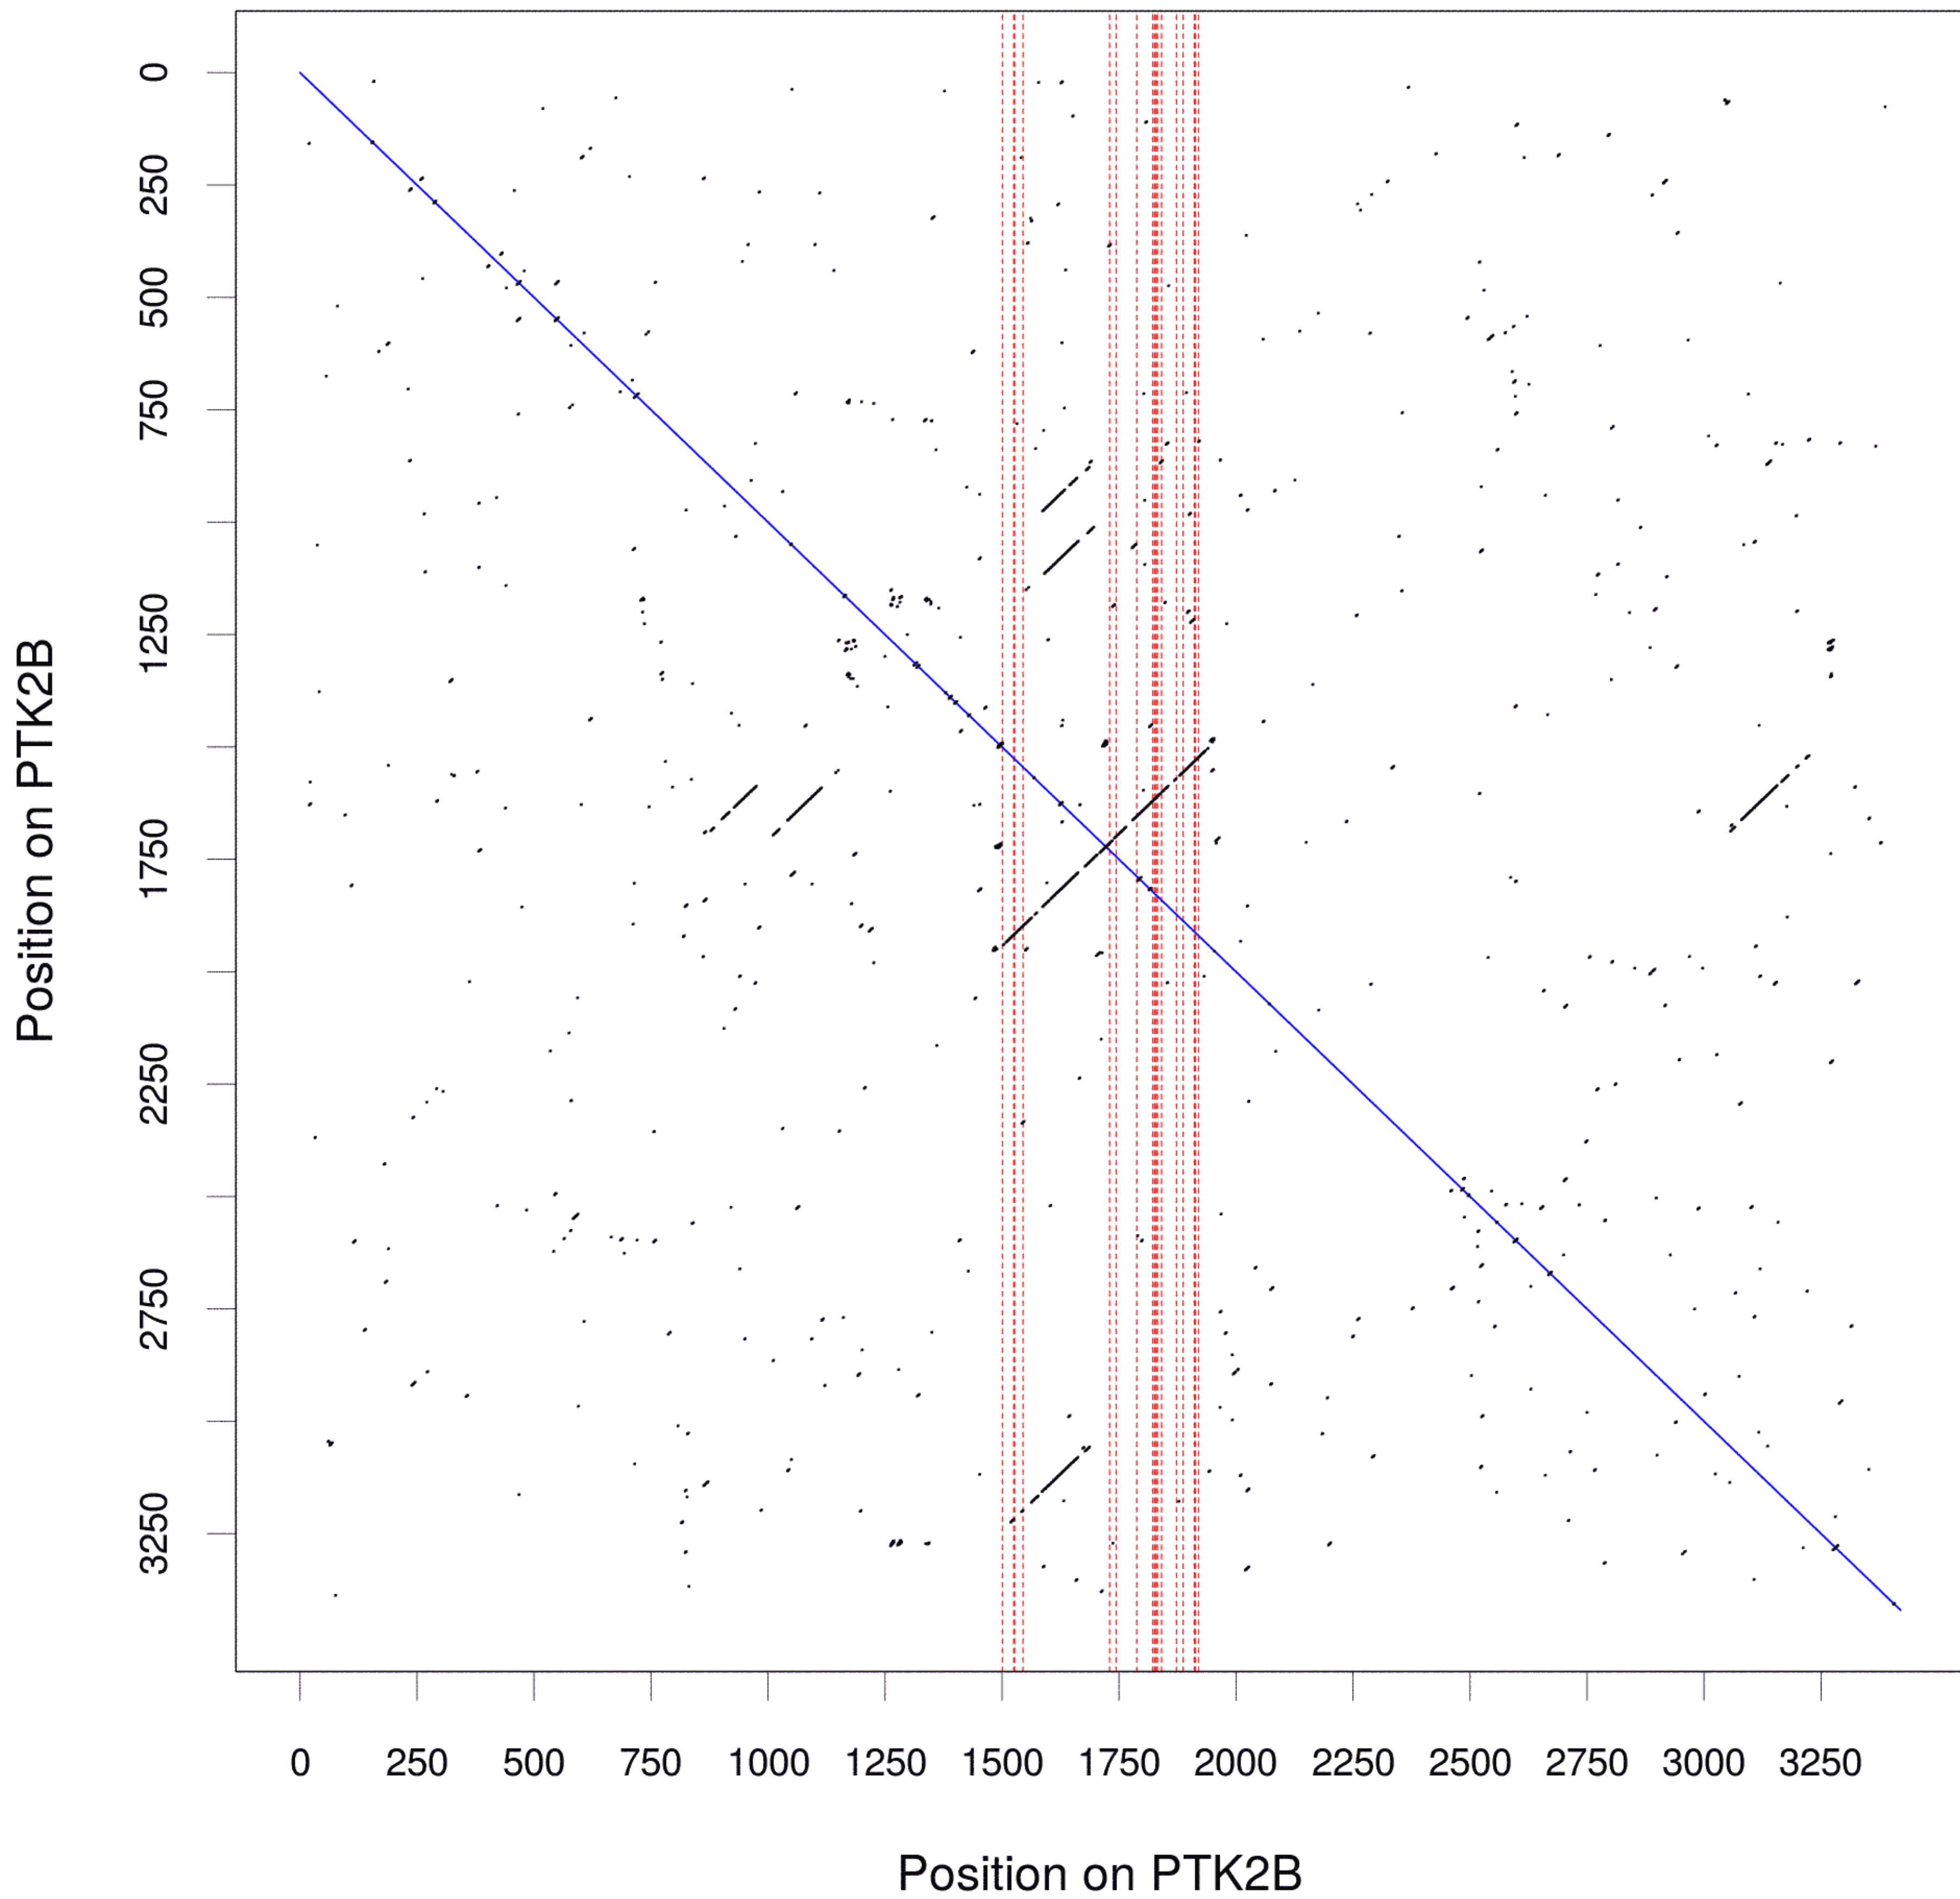

# PTS

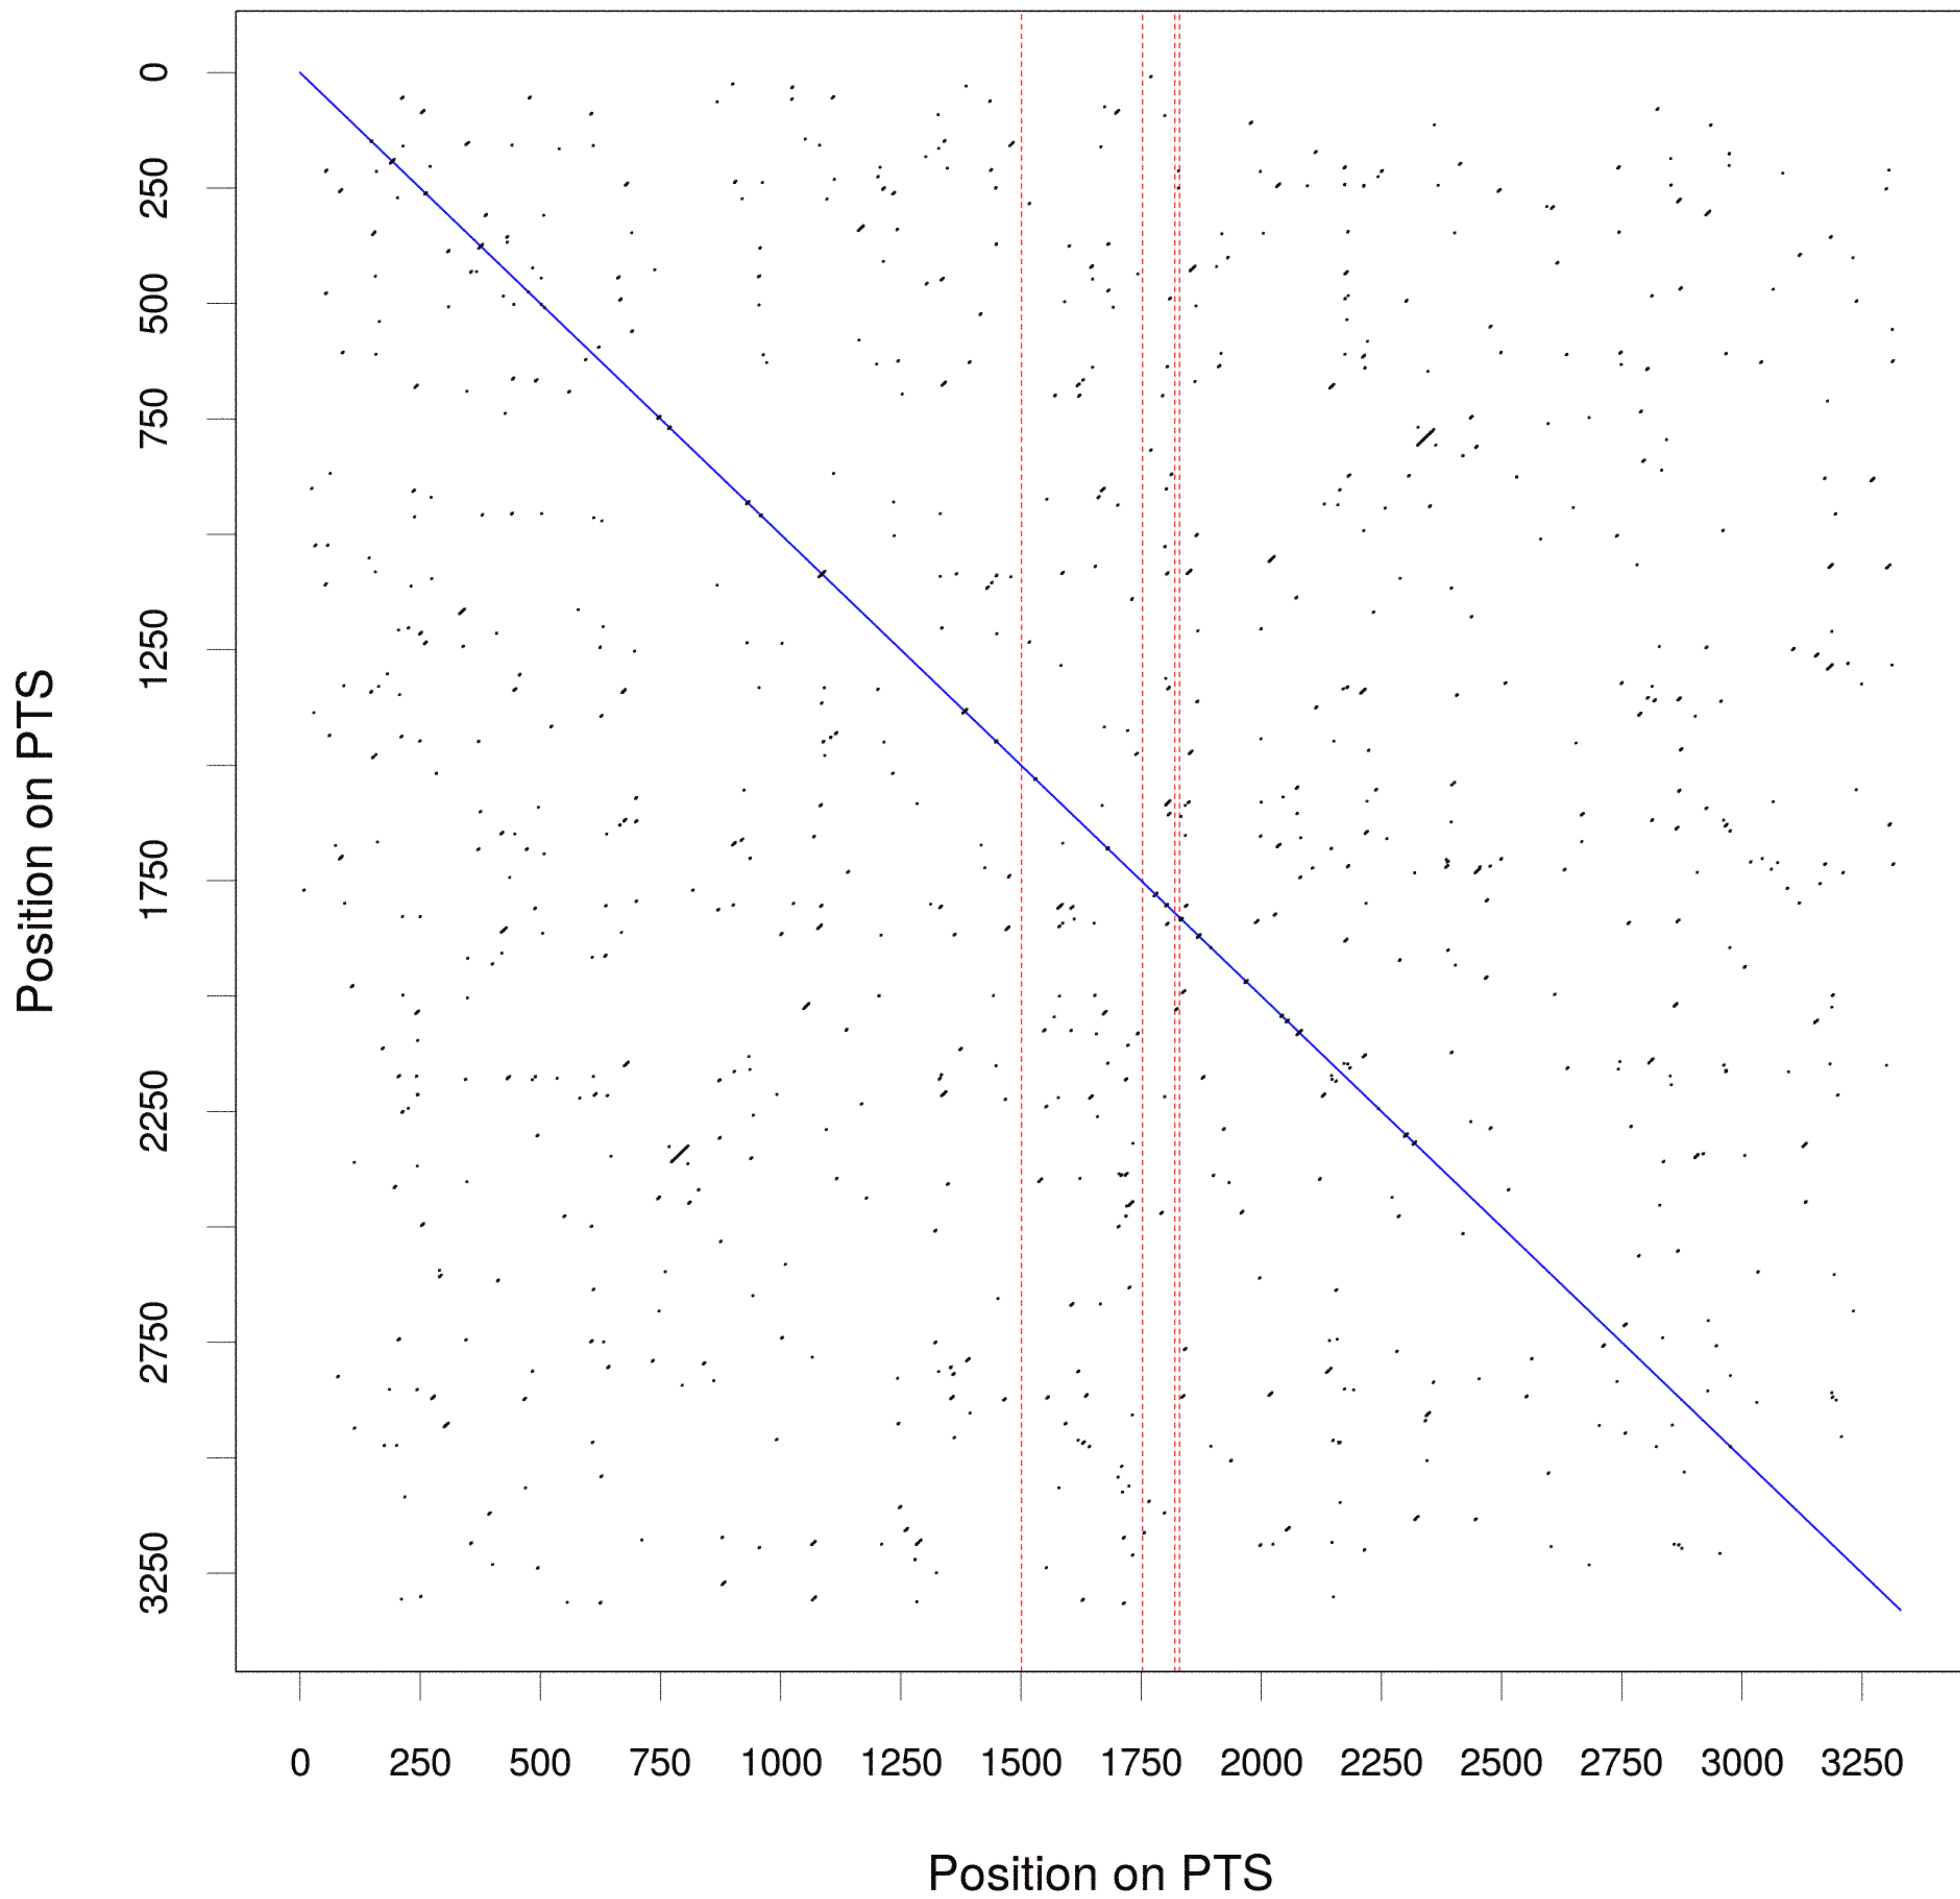

# RAB3IP

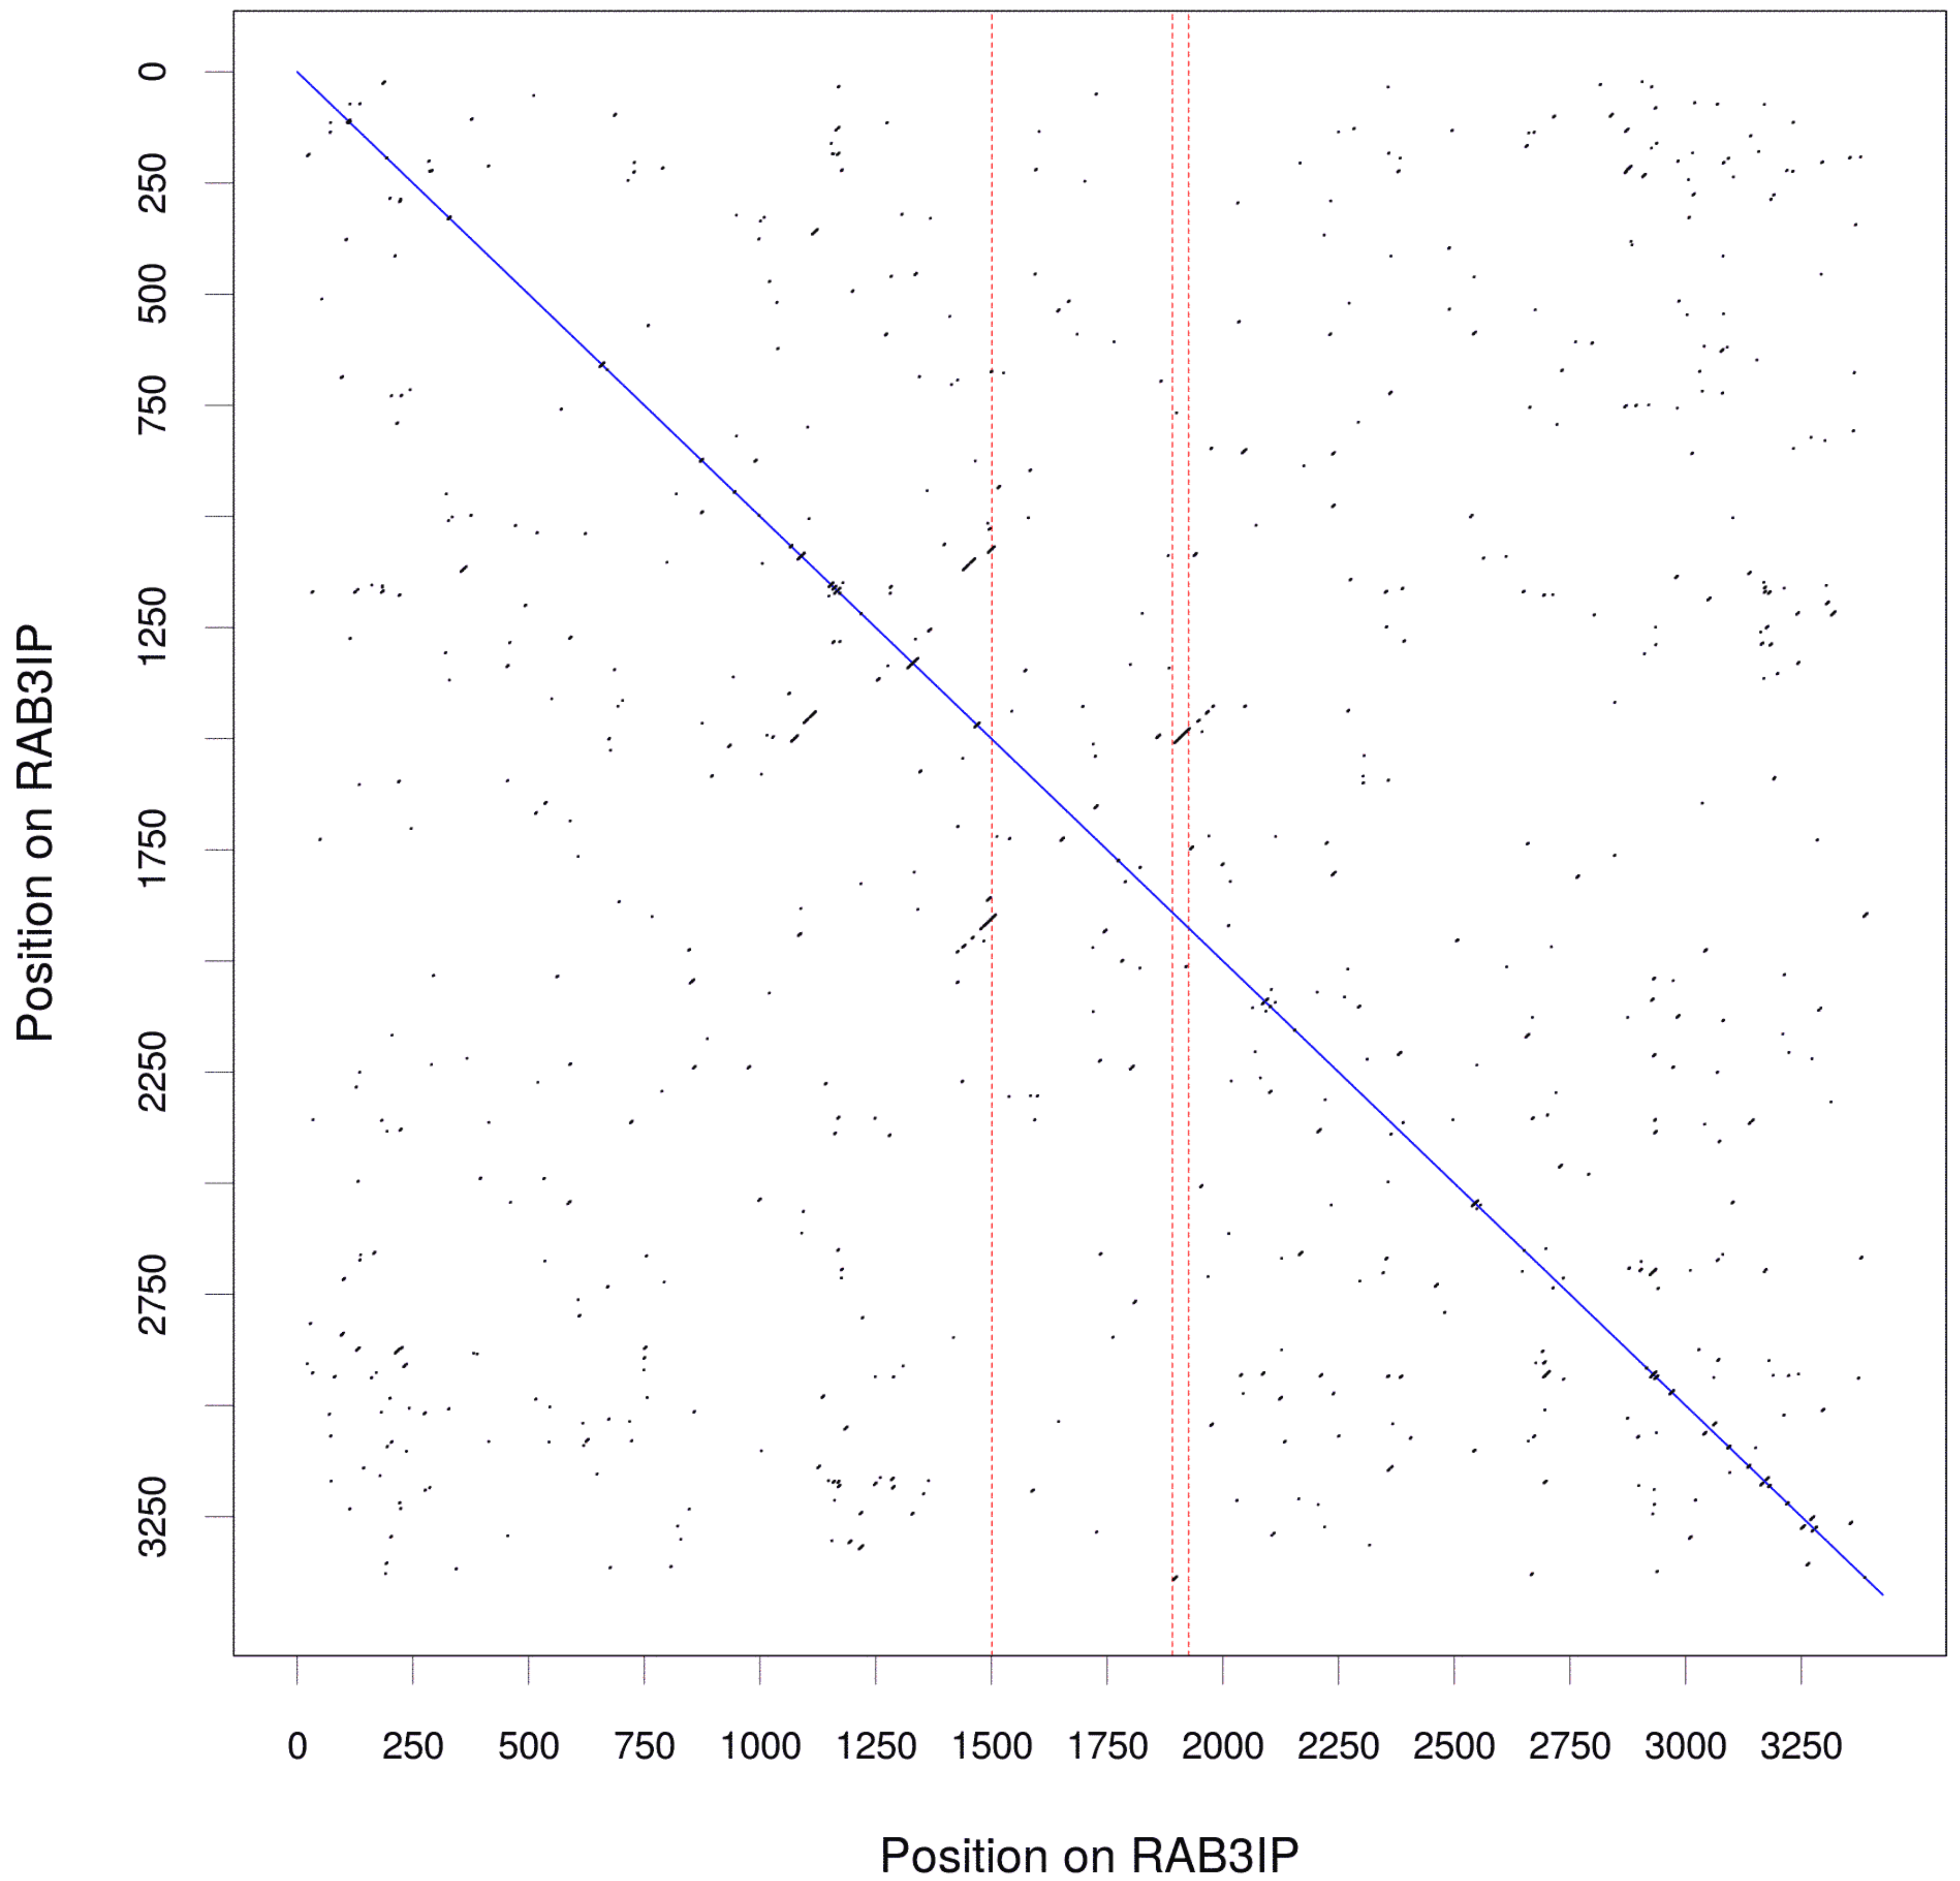

# RAB12

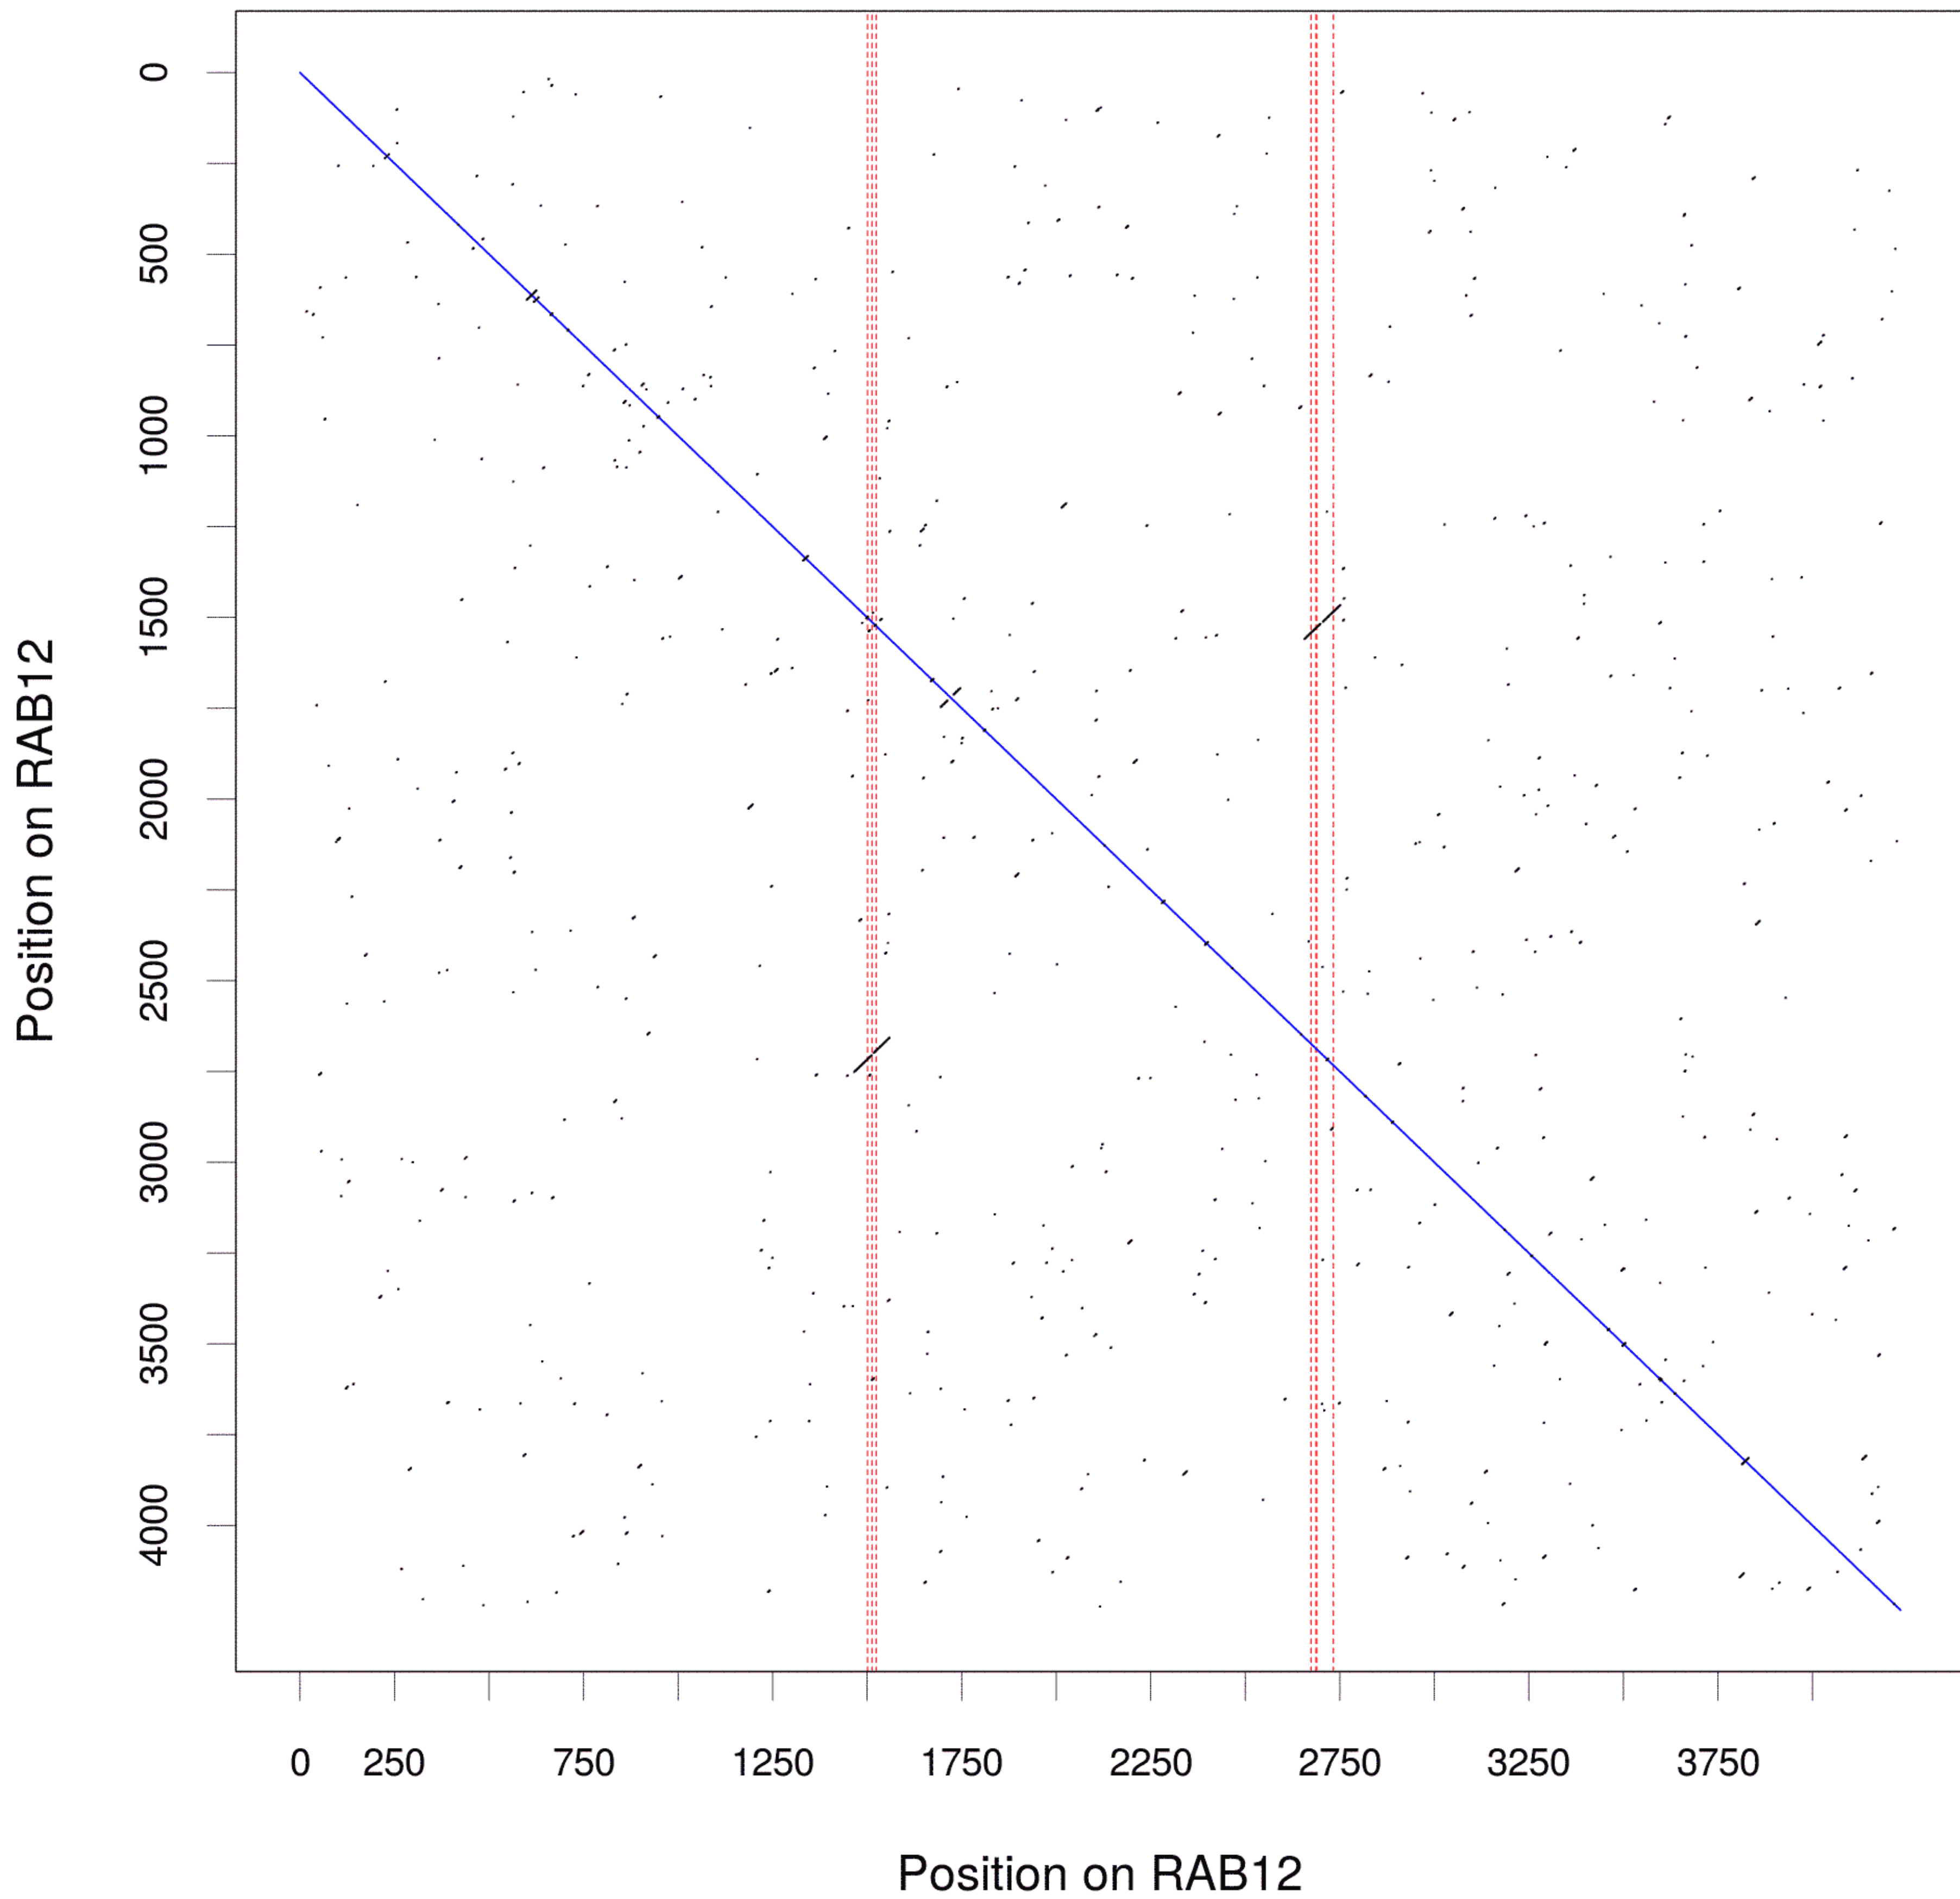

# RAB18

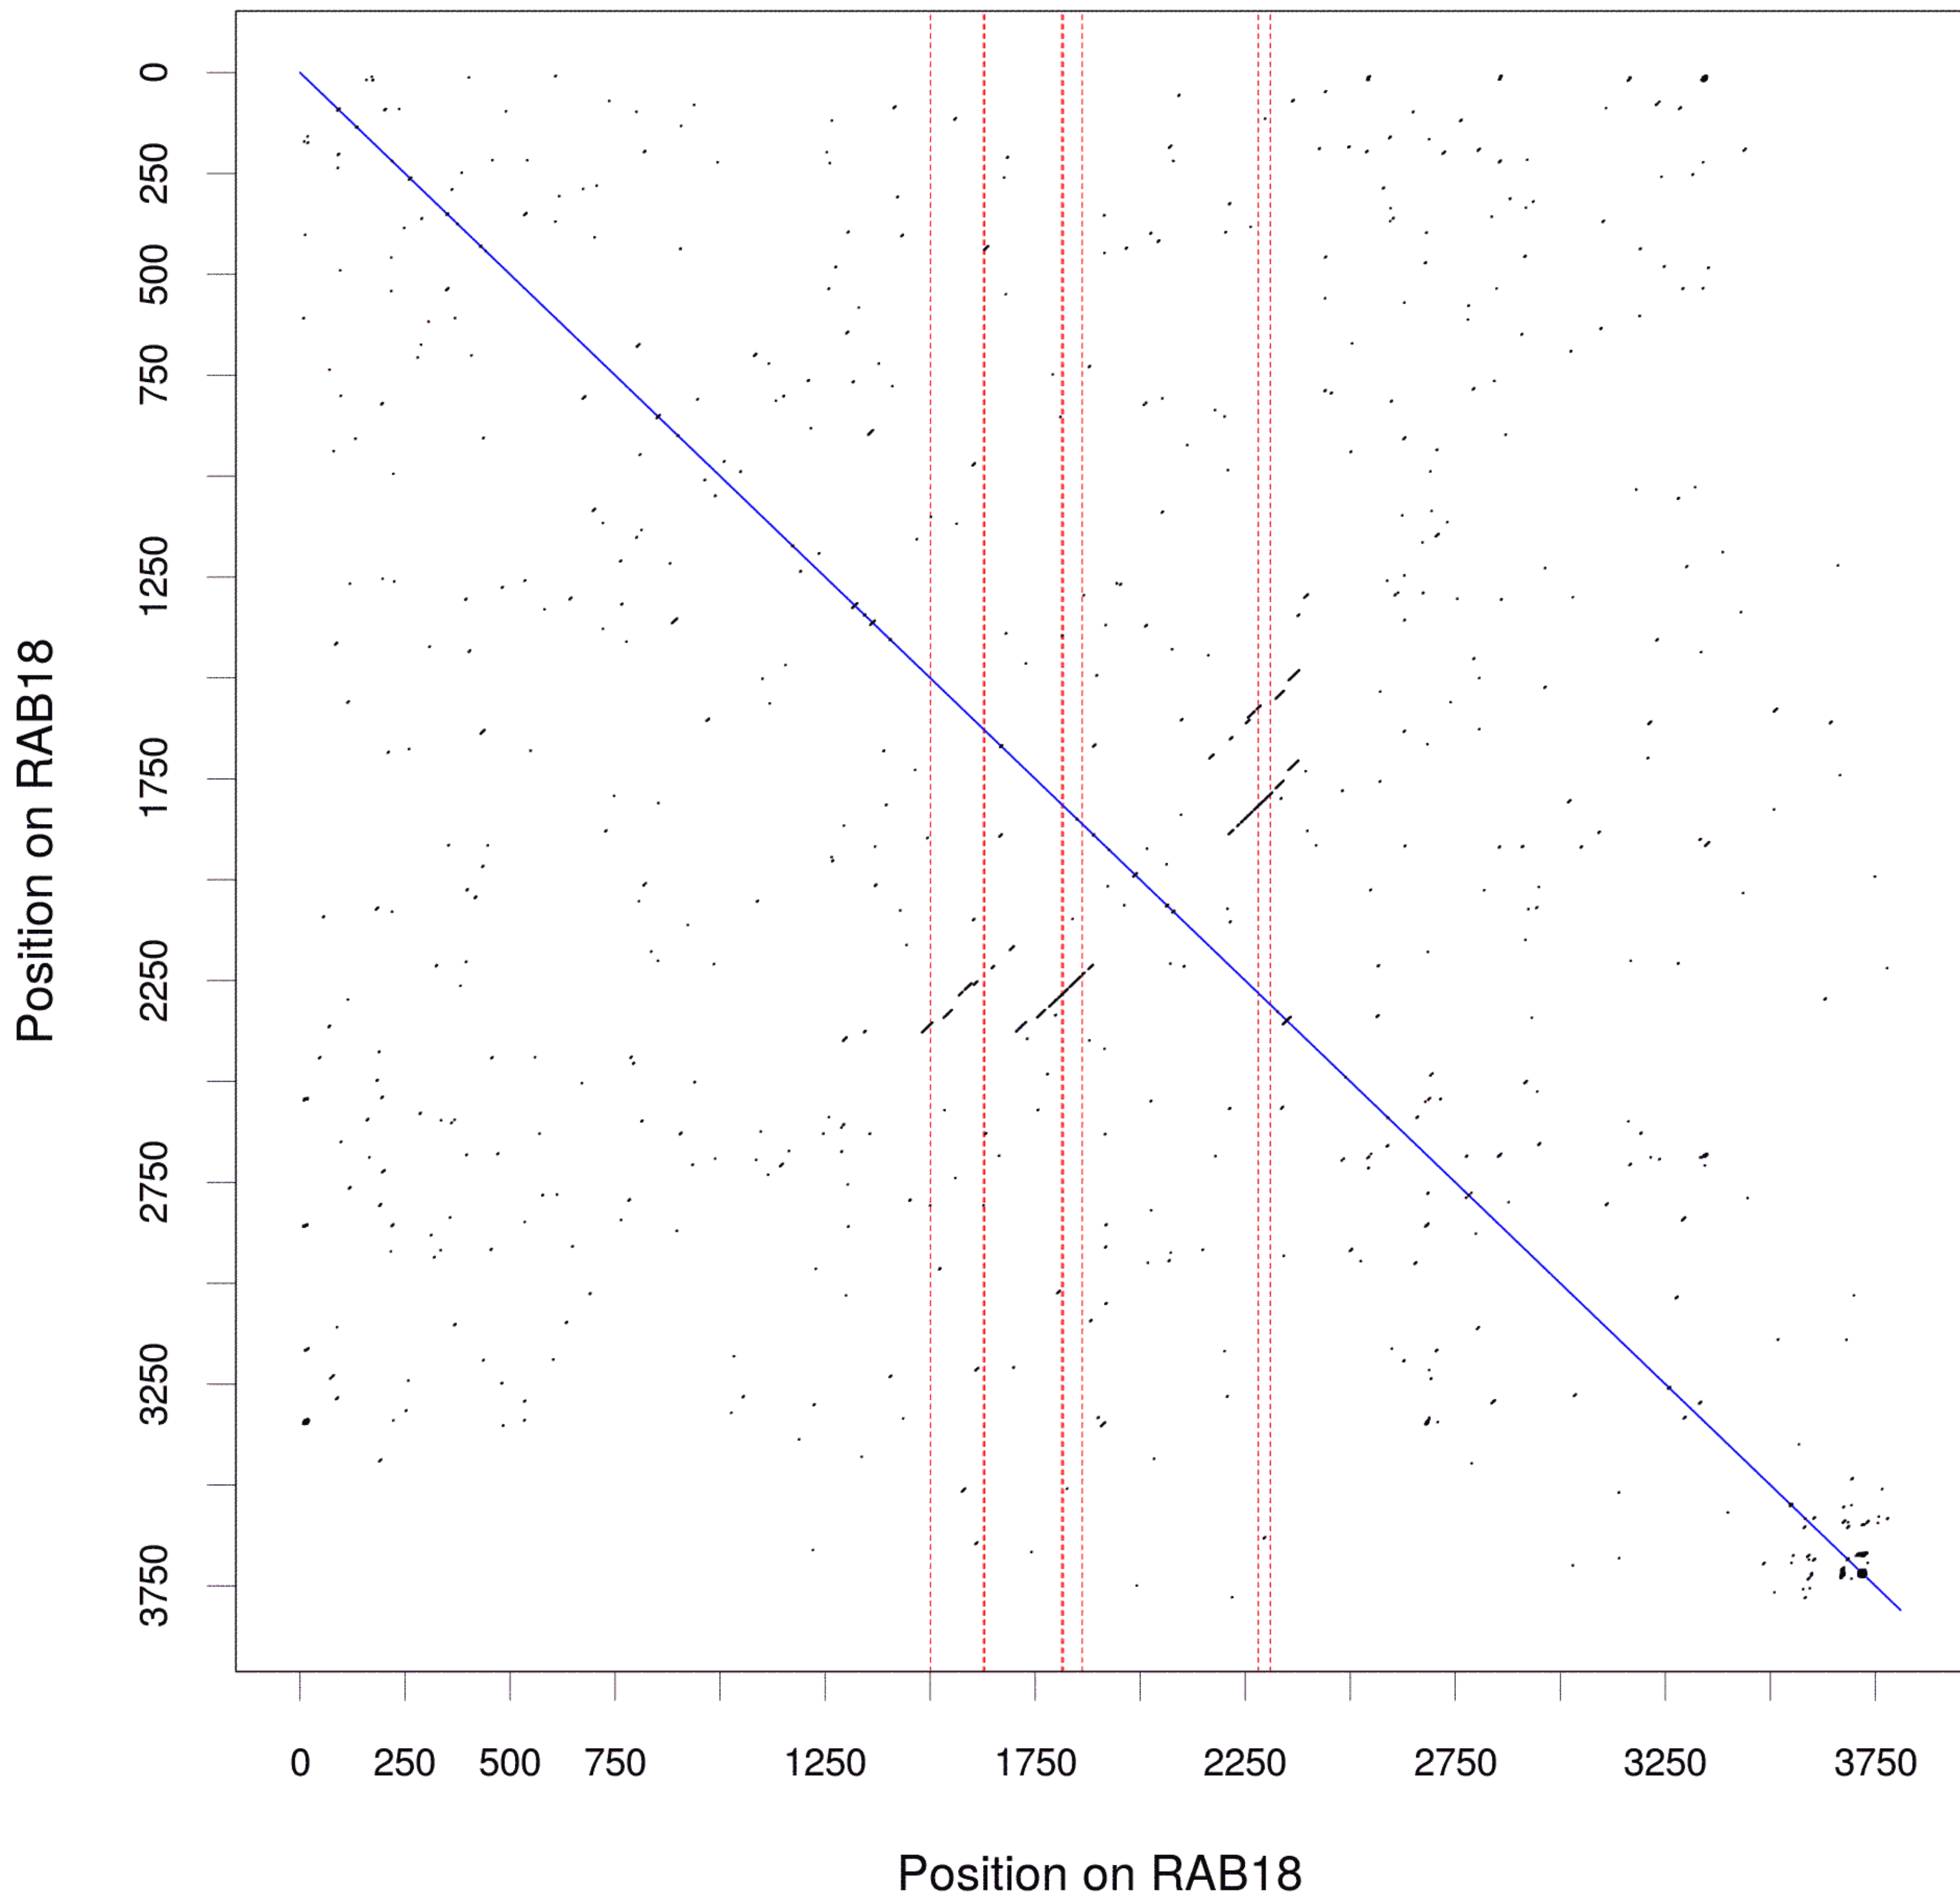

# RAD51D

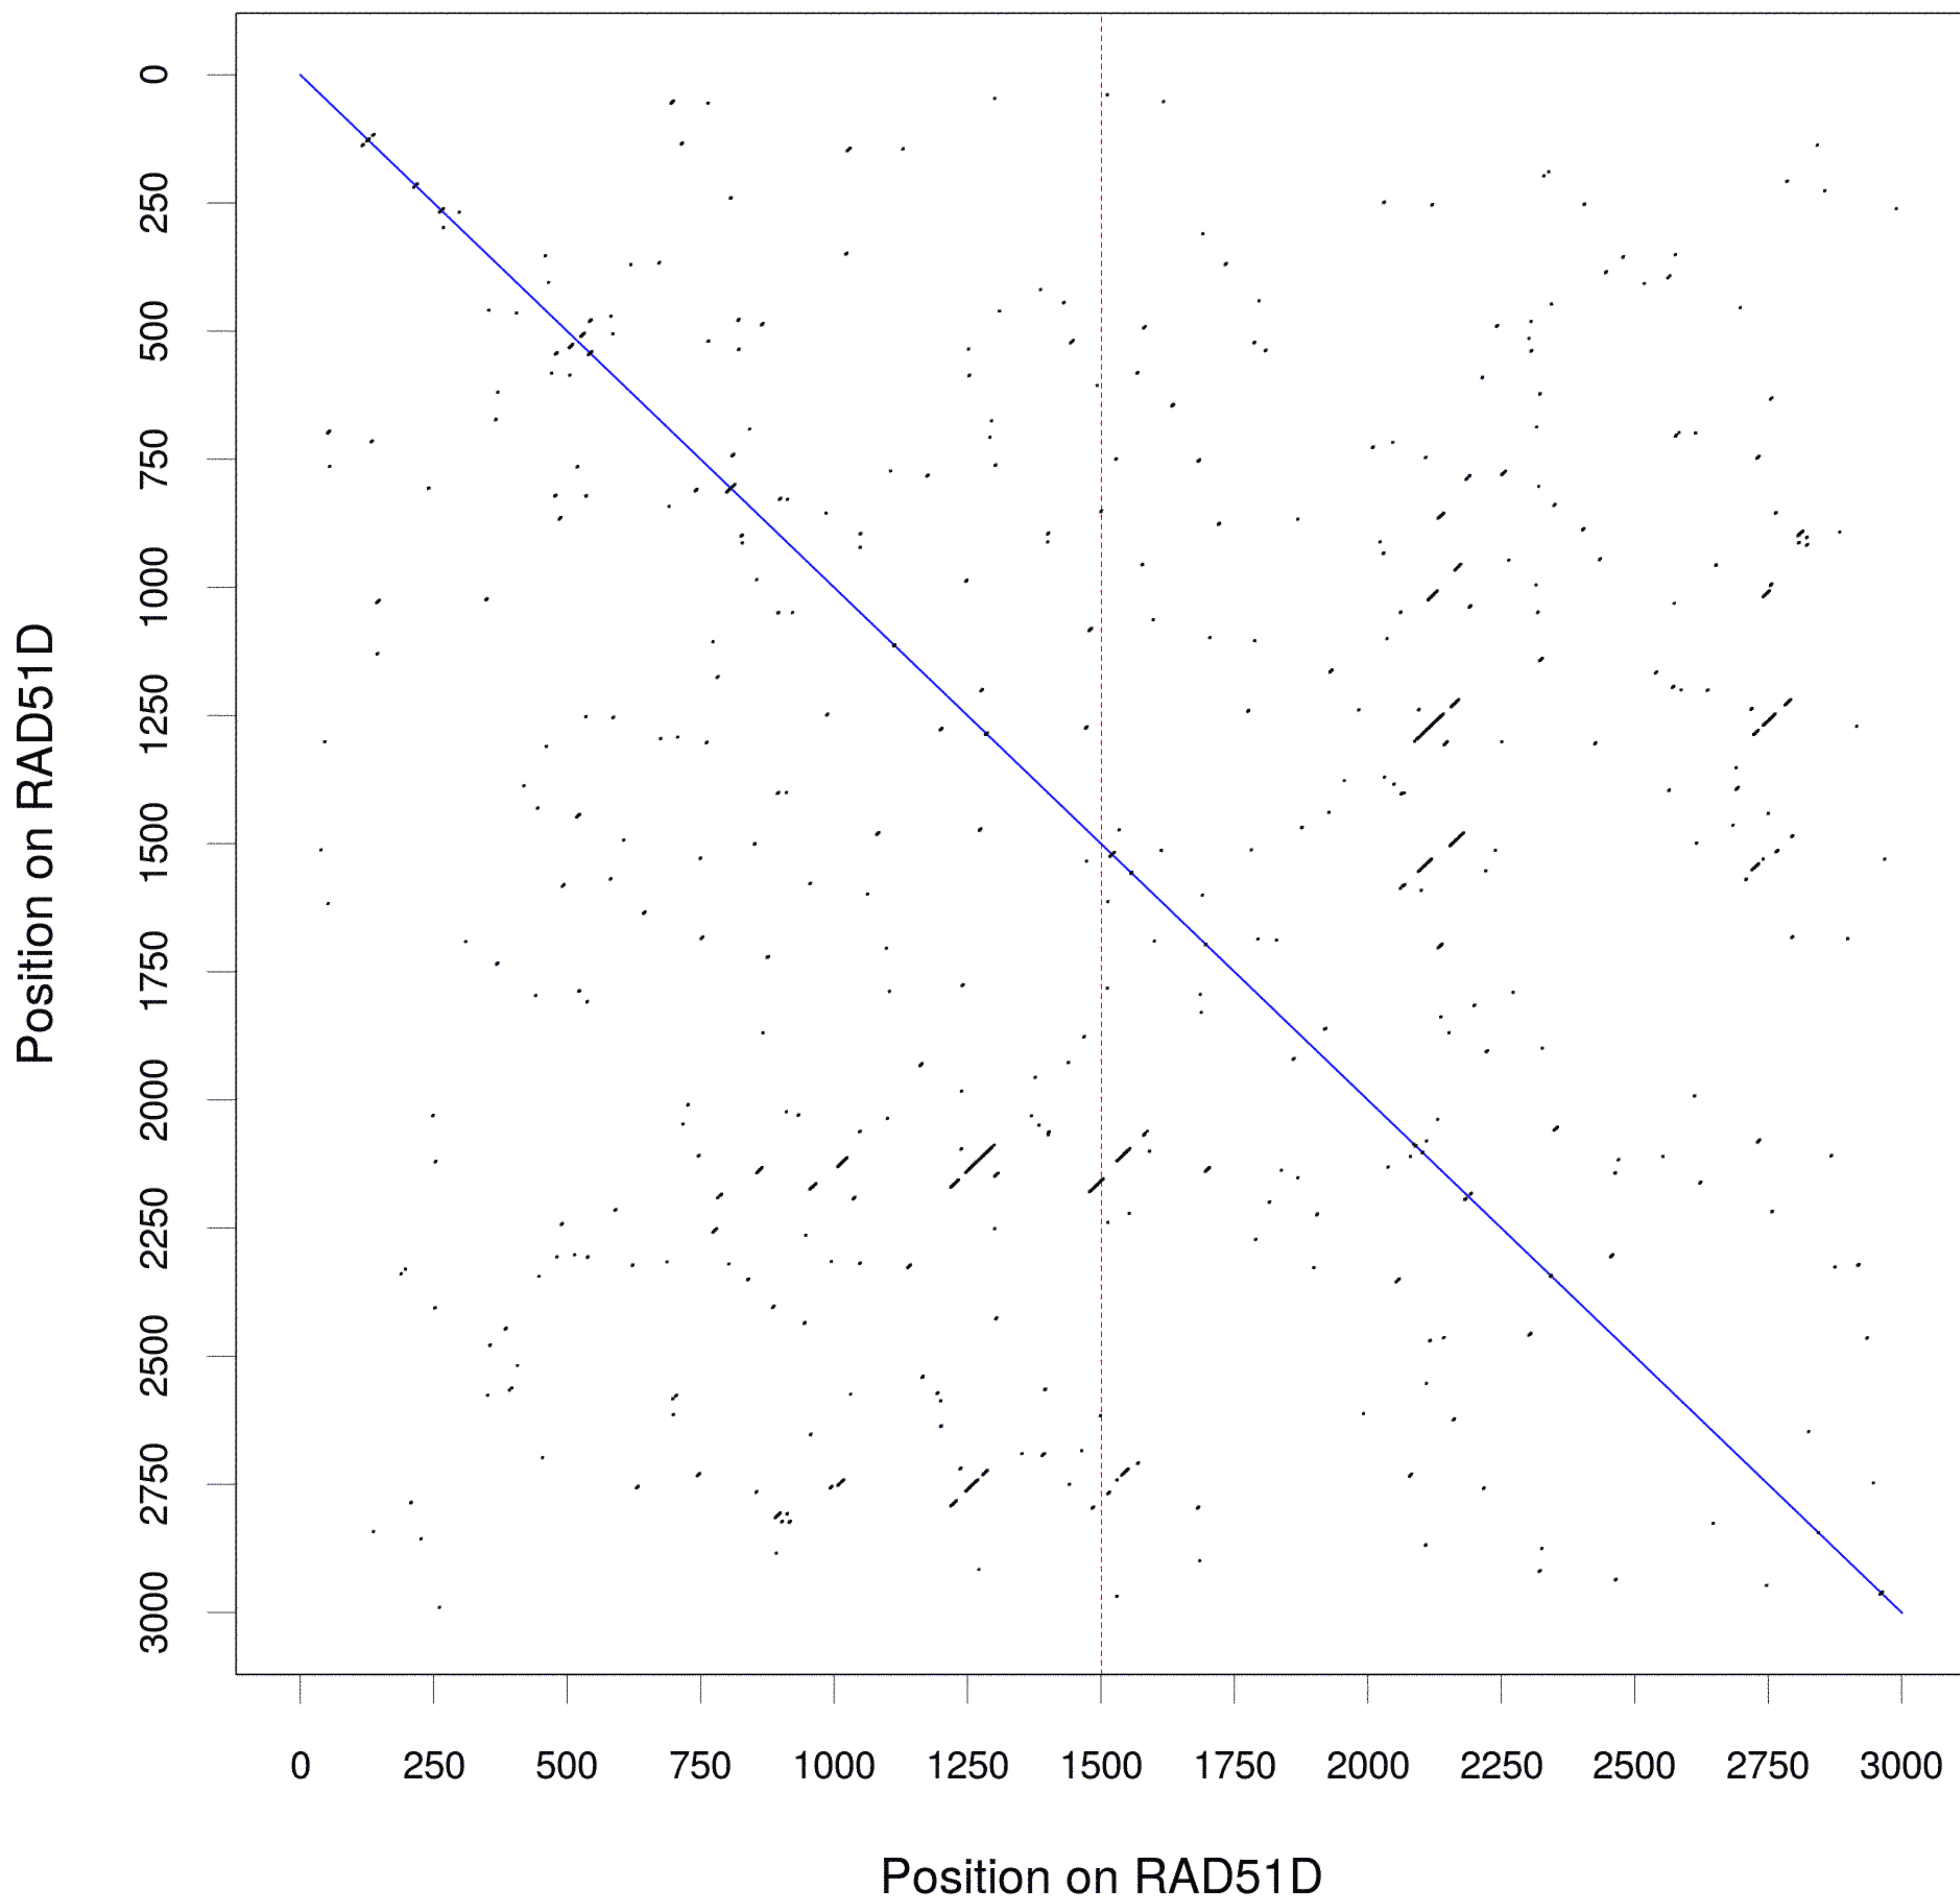



# RAMP3

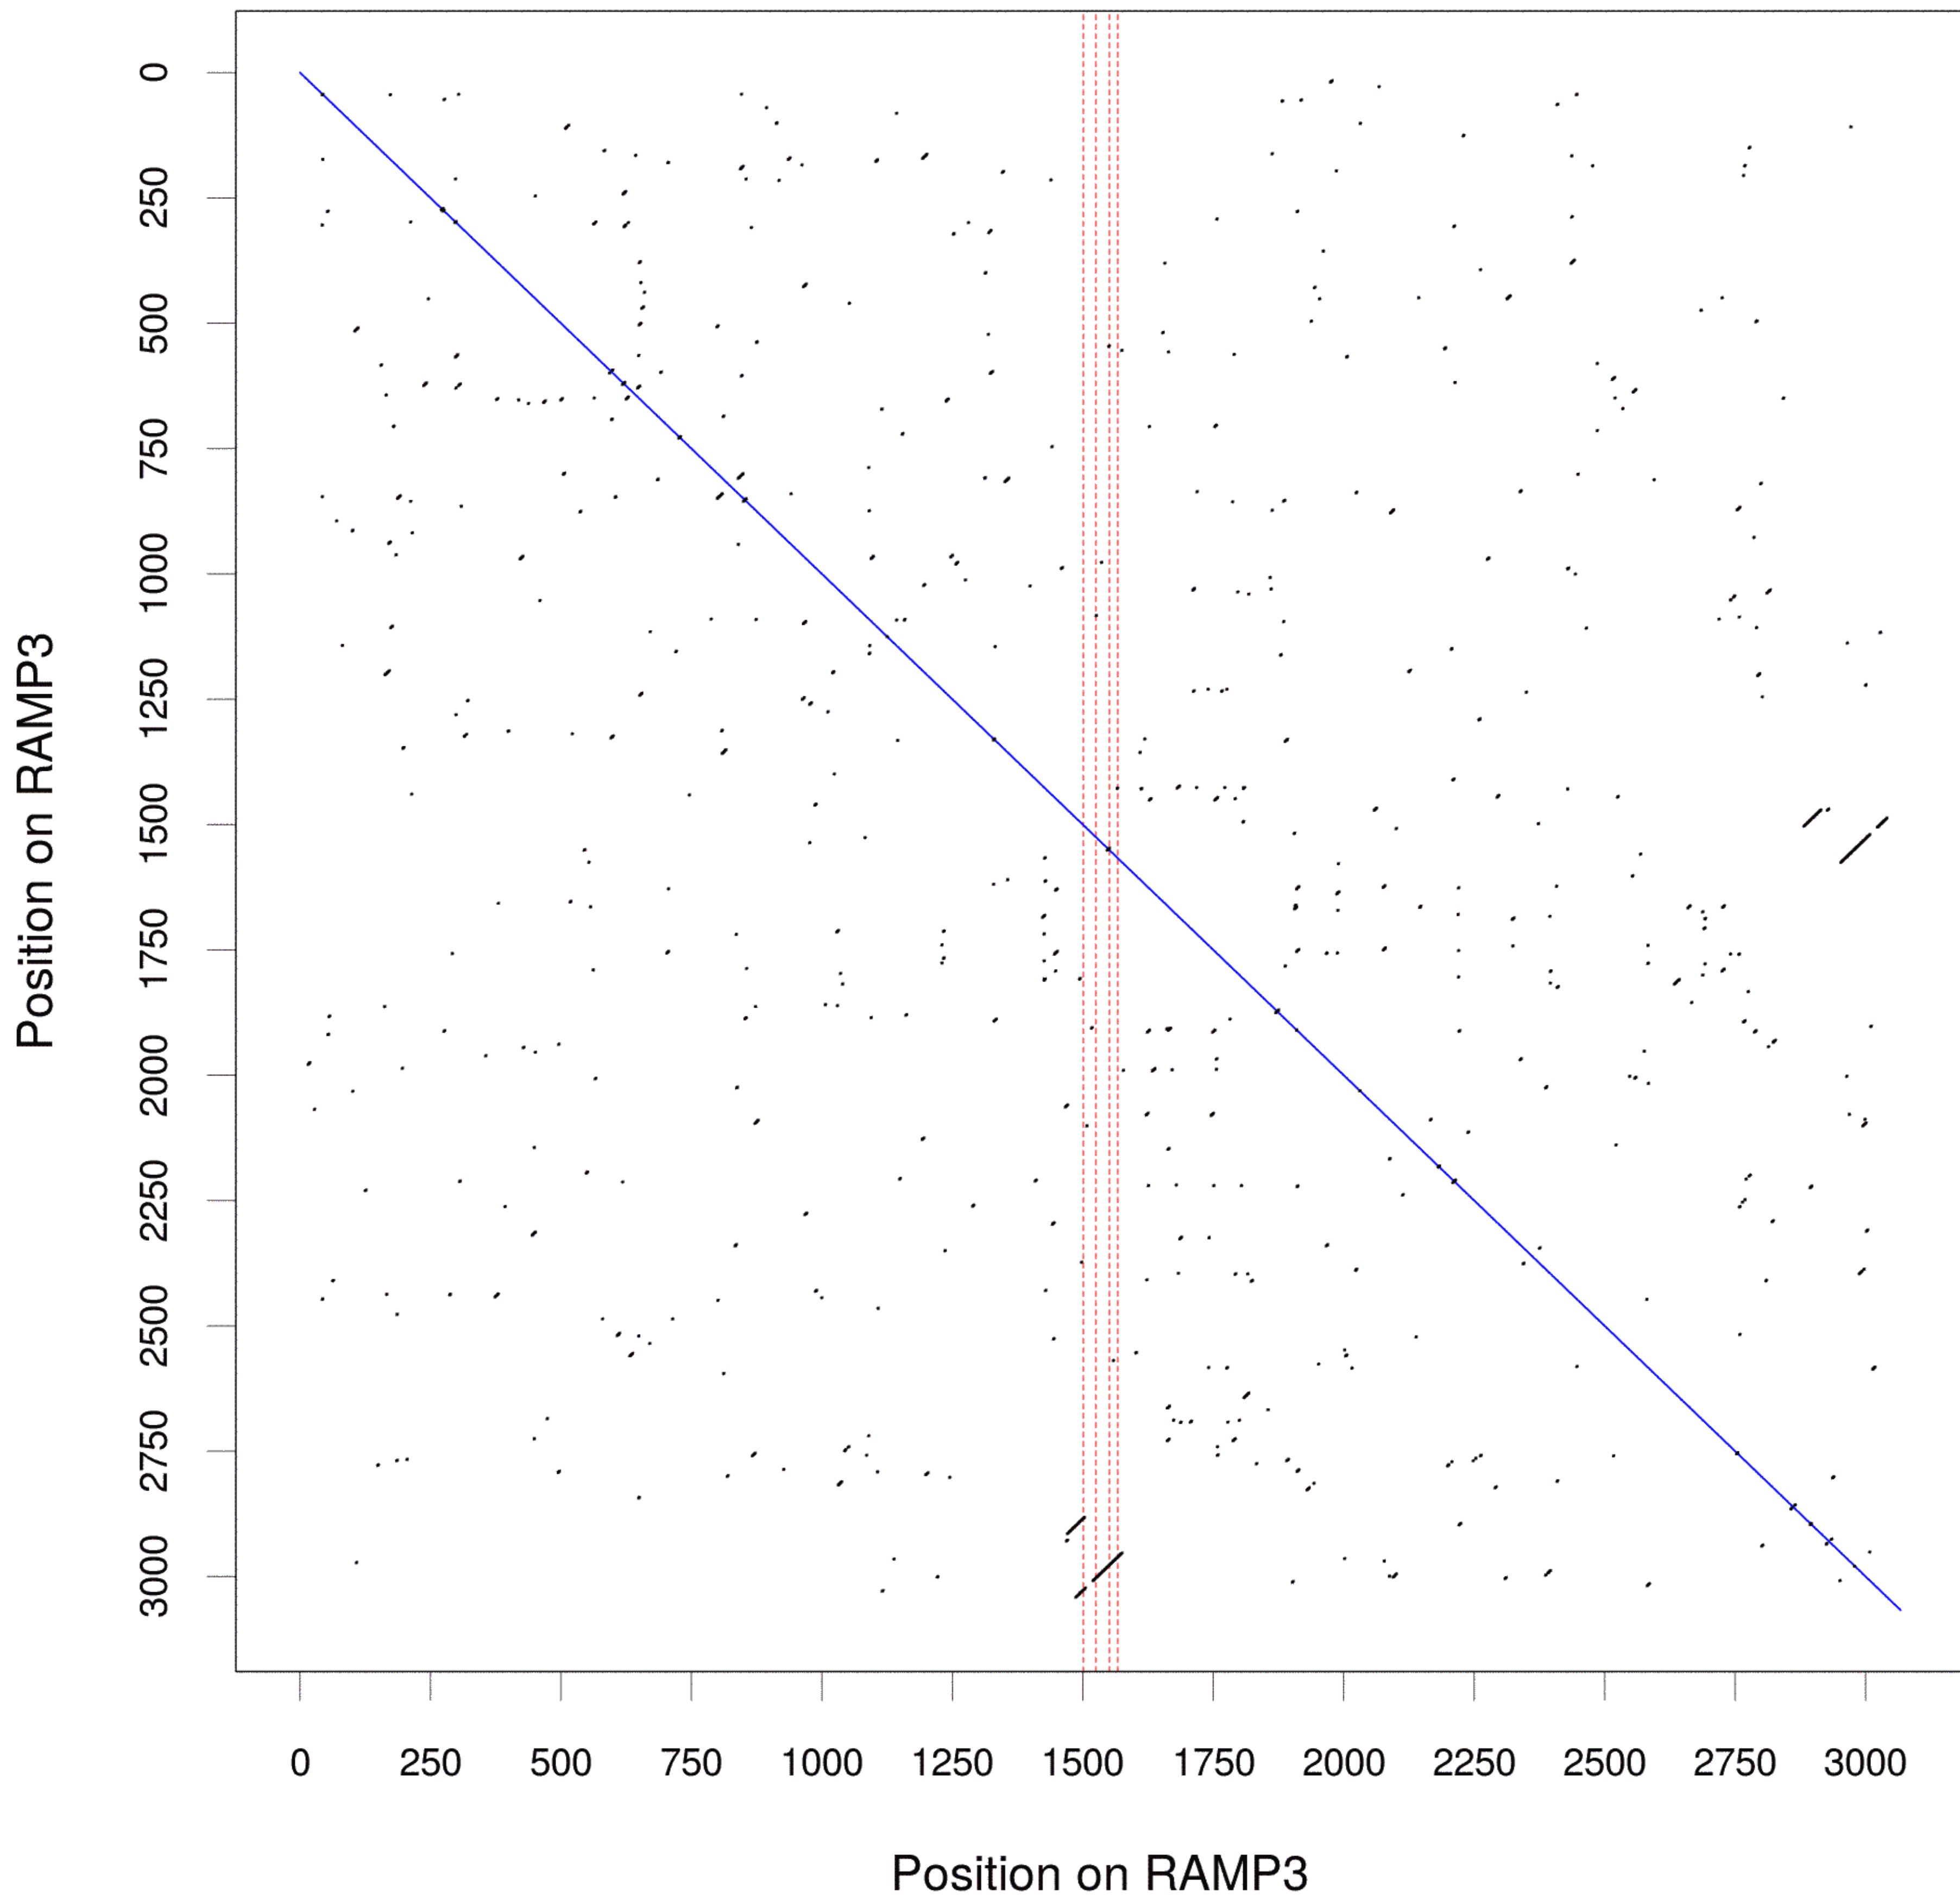

# RASGEF1B

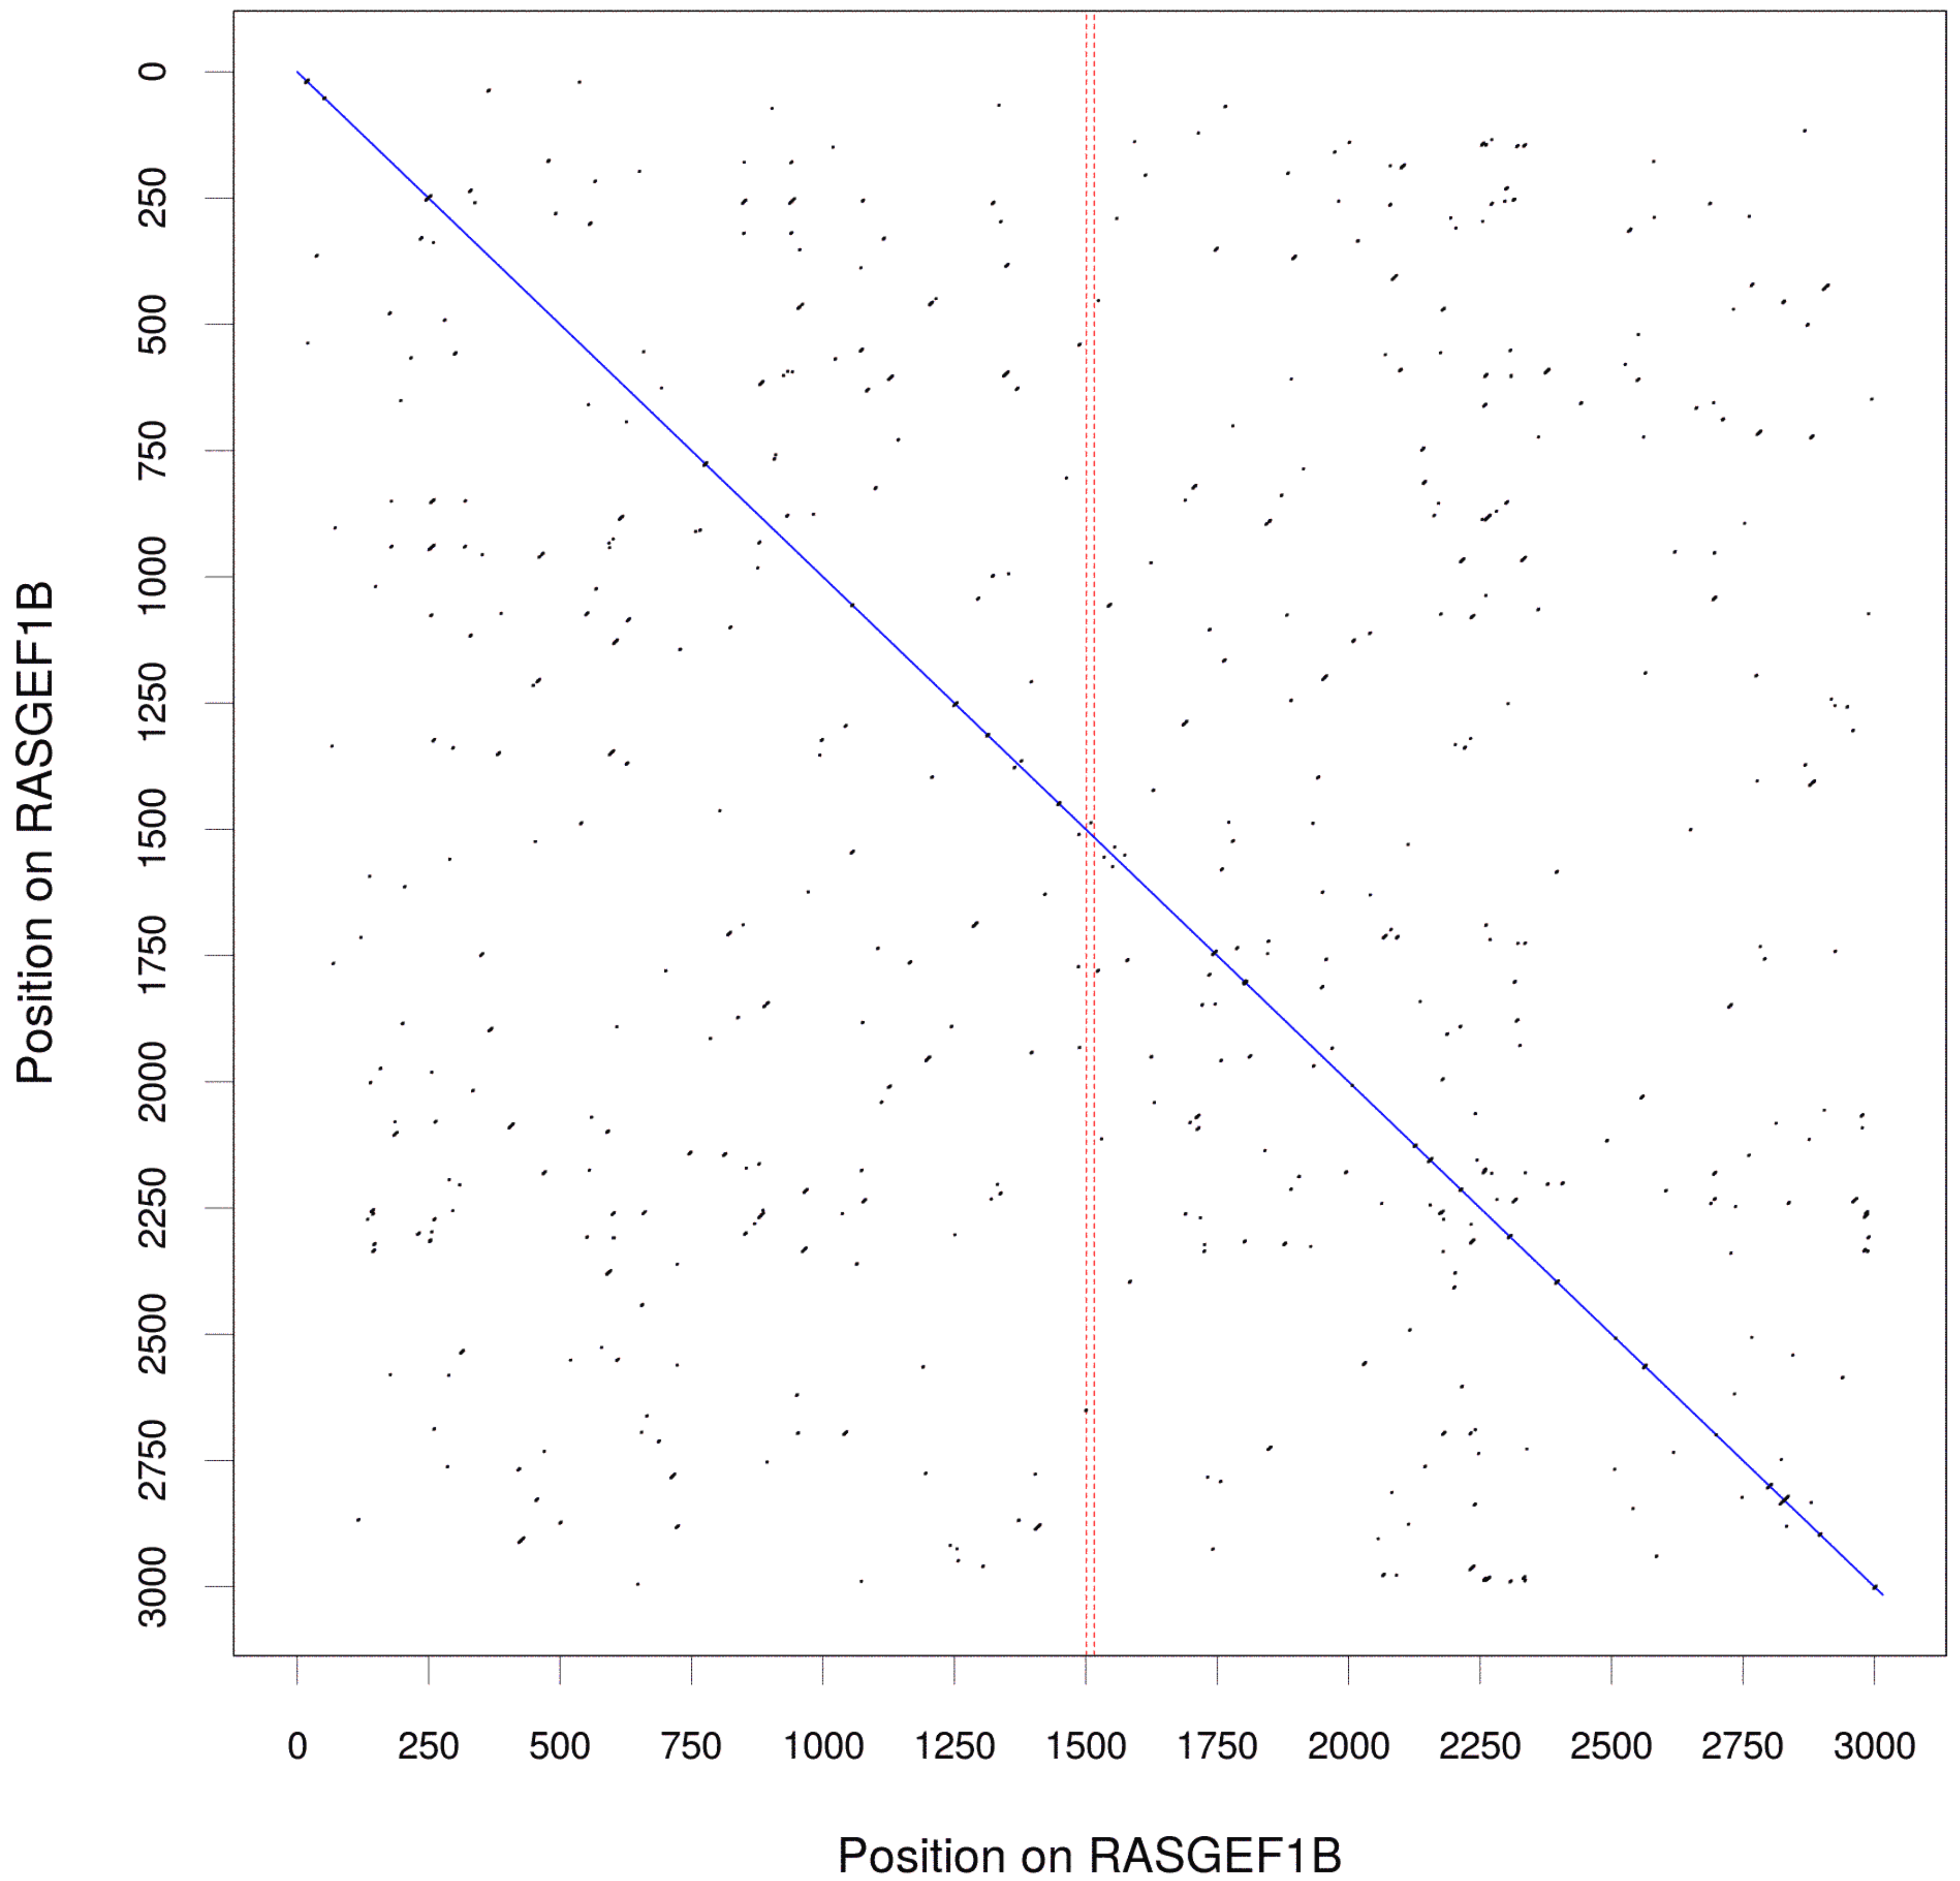

# RASSF4

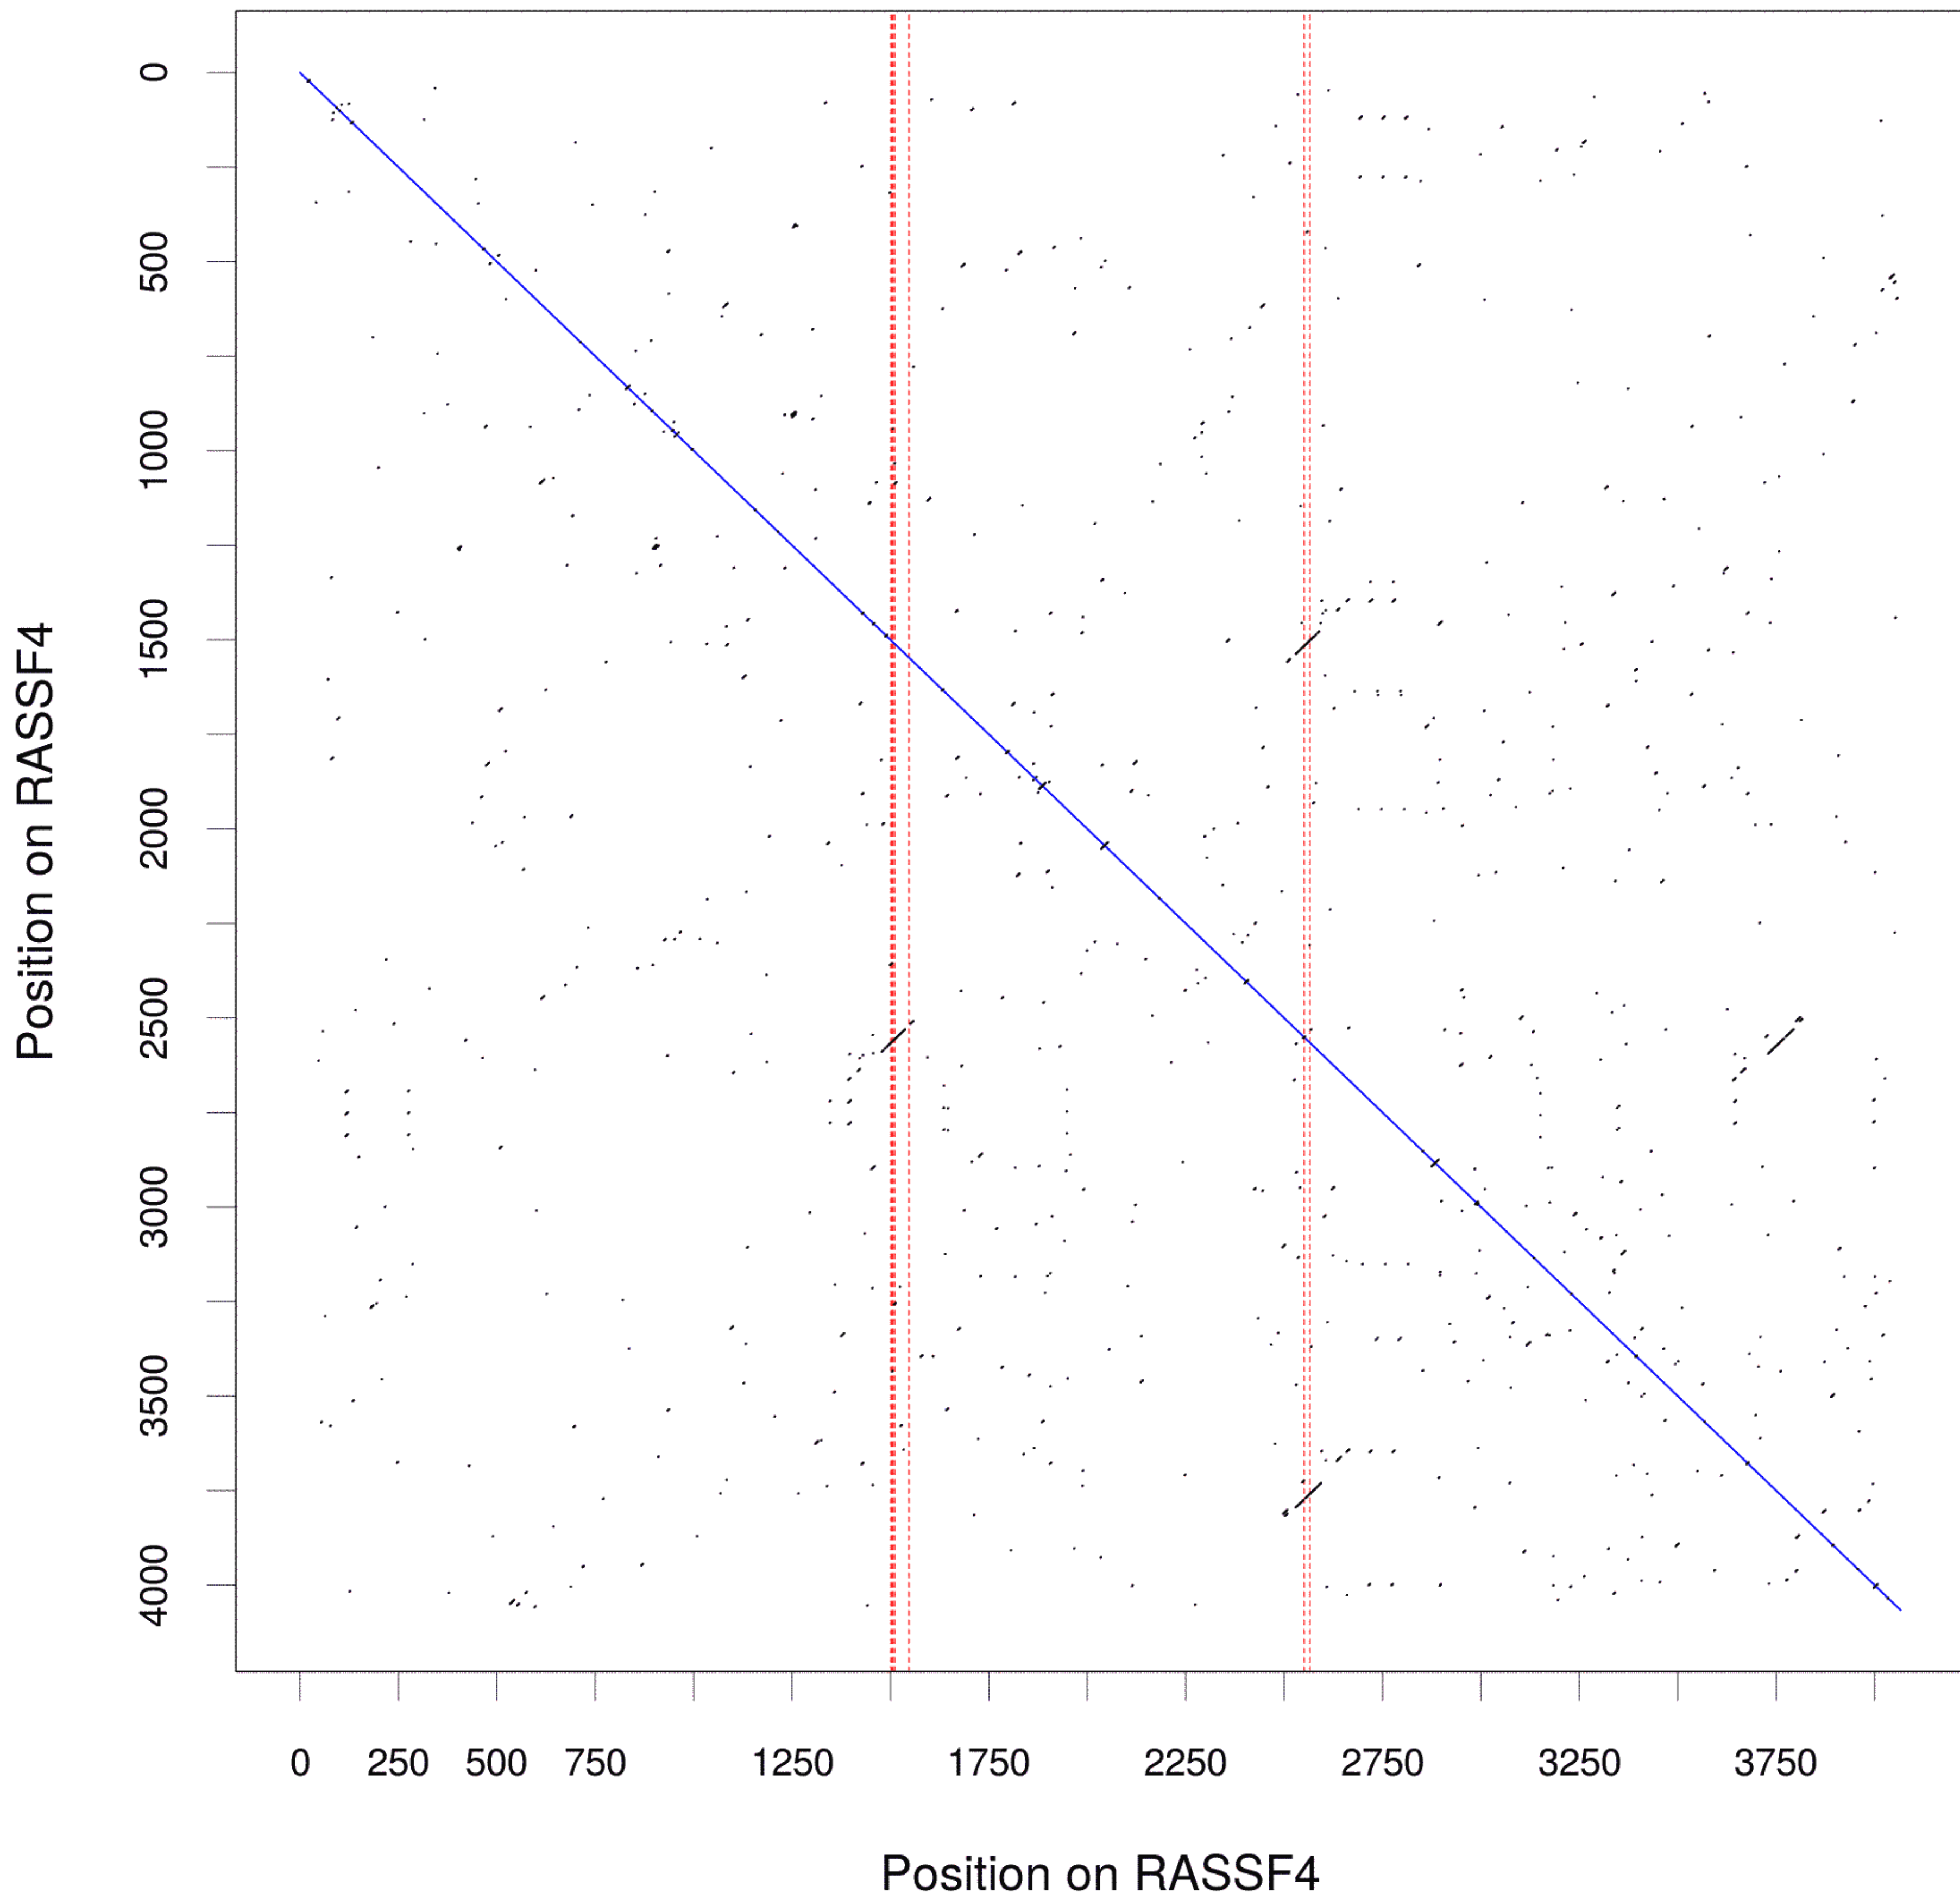

# RBL1

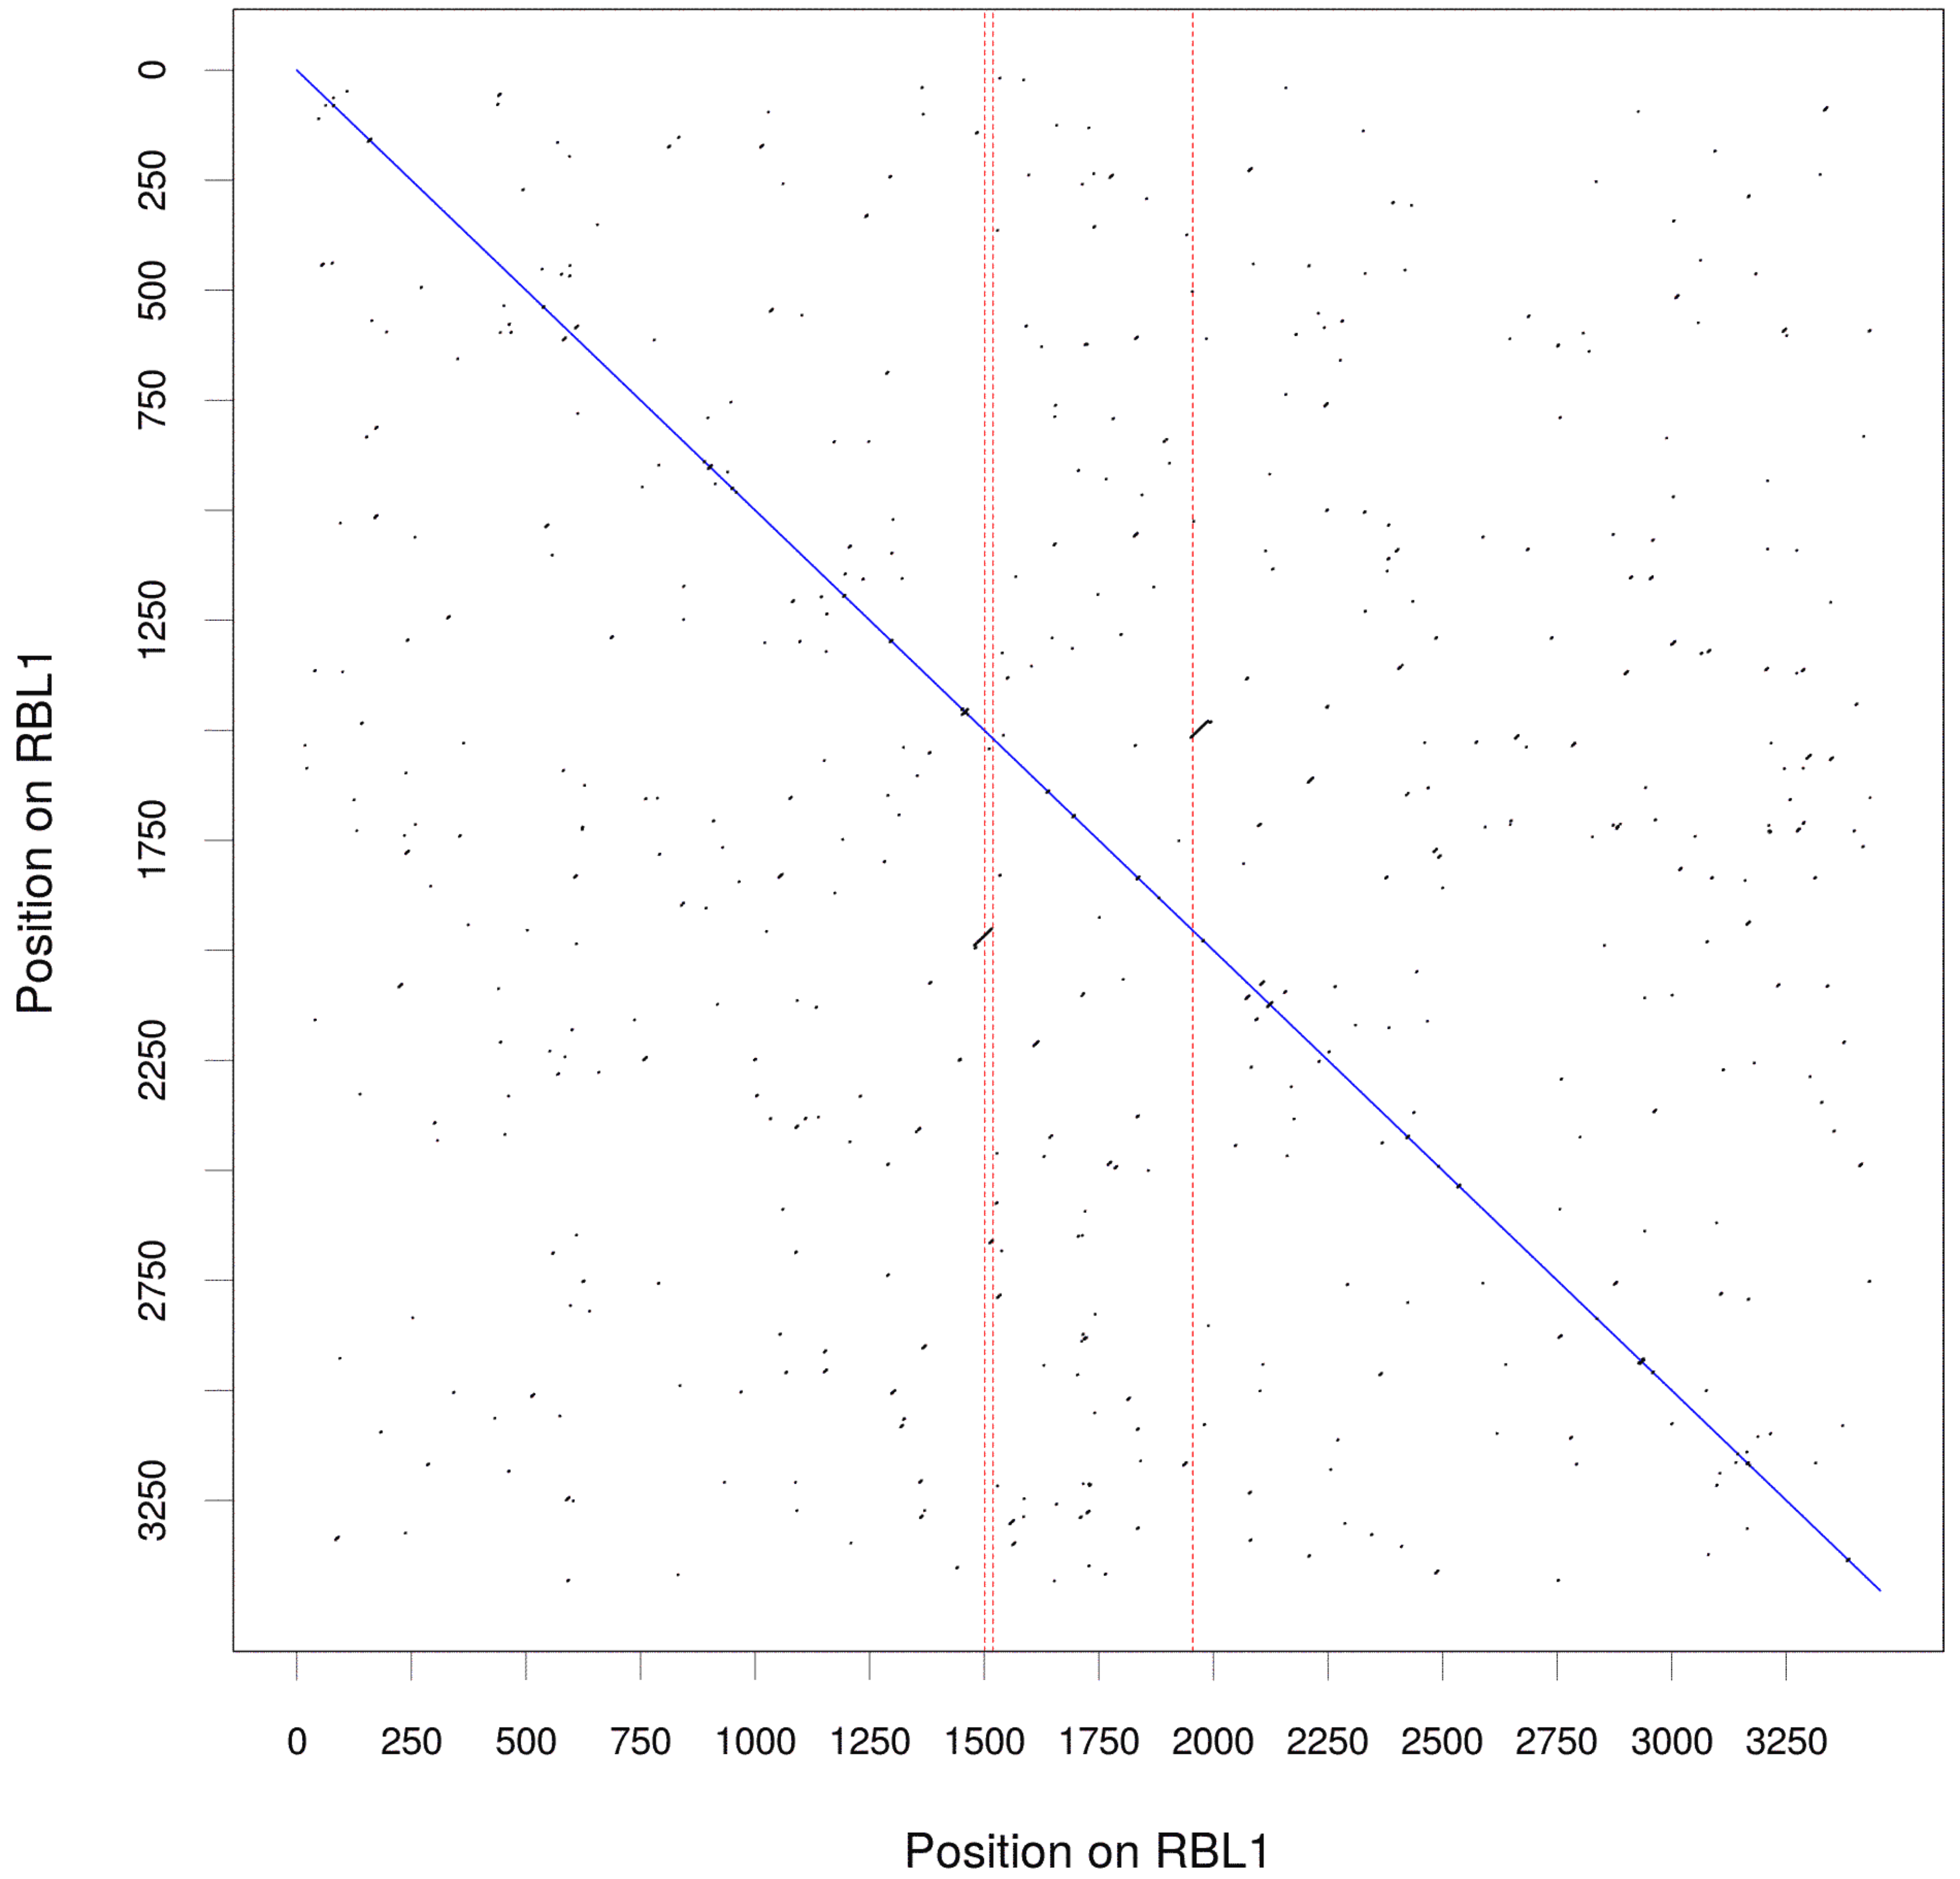

# RBM14

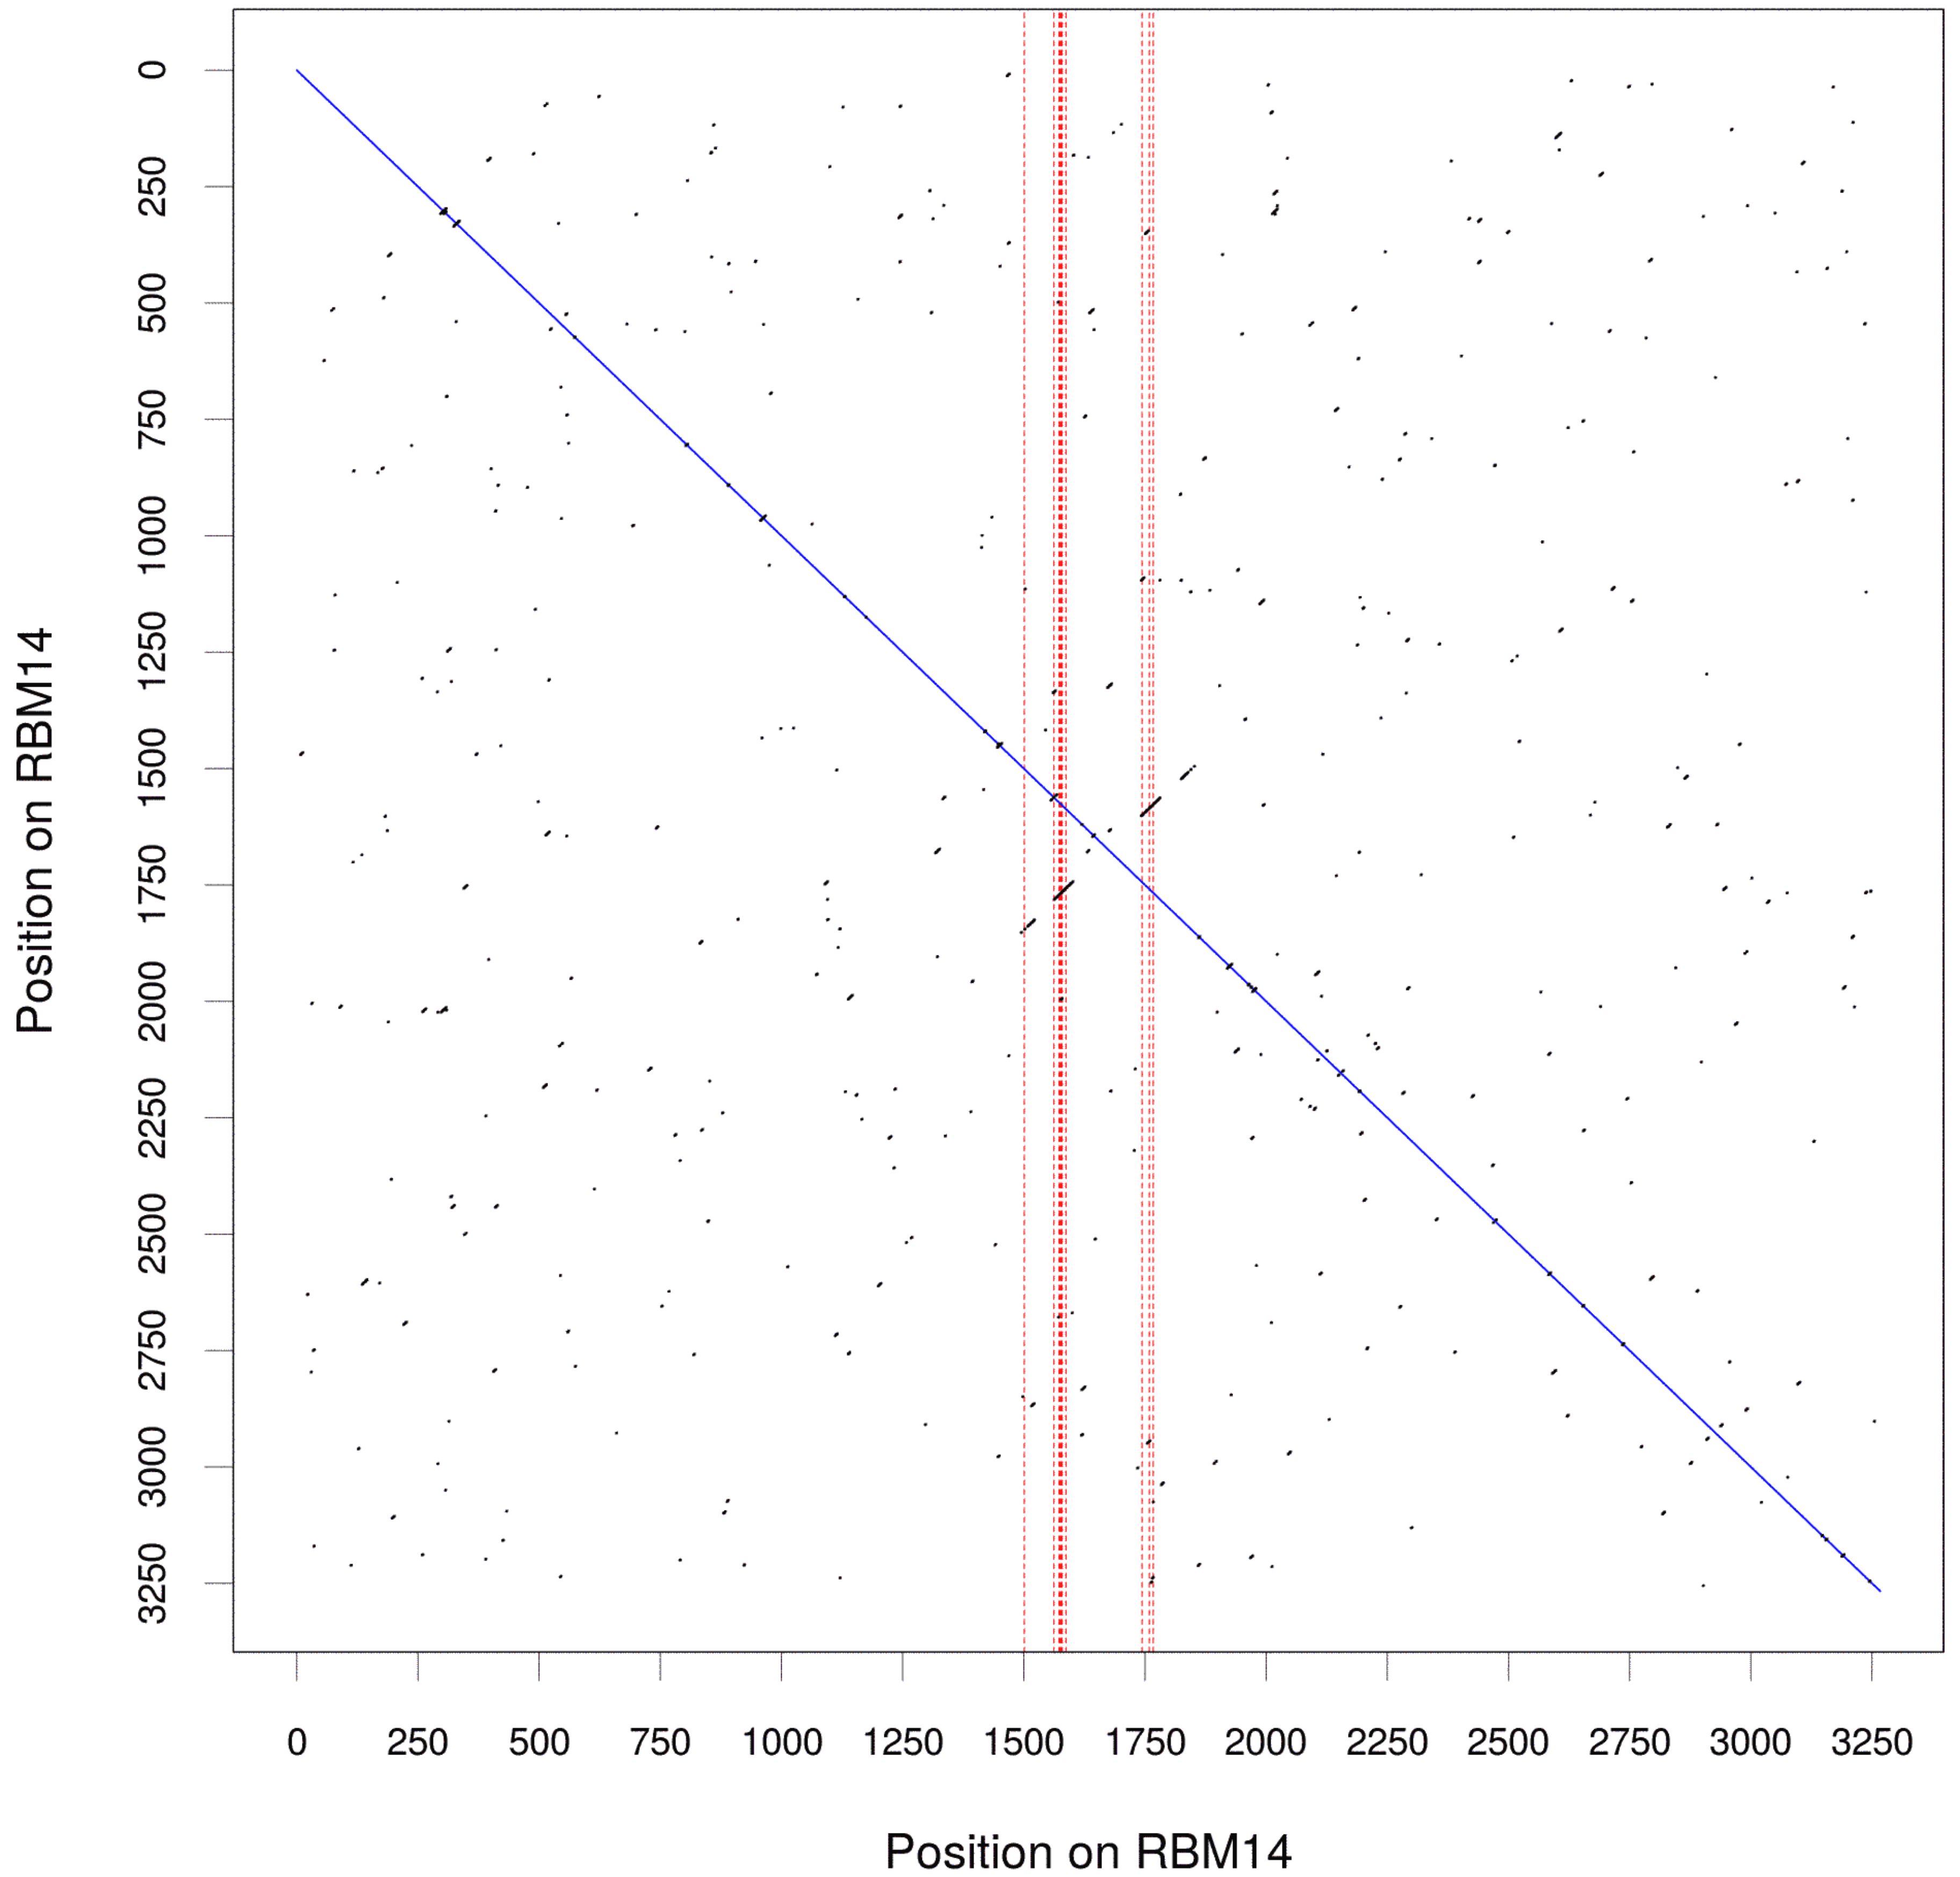

# RBP7

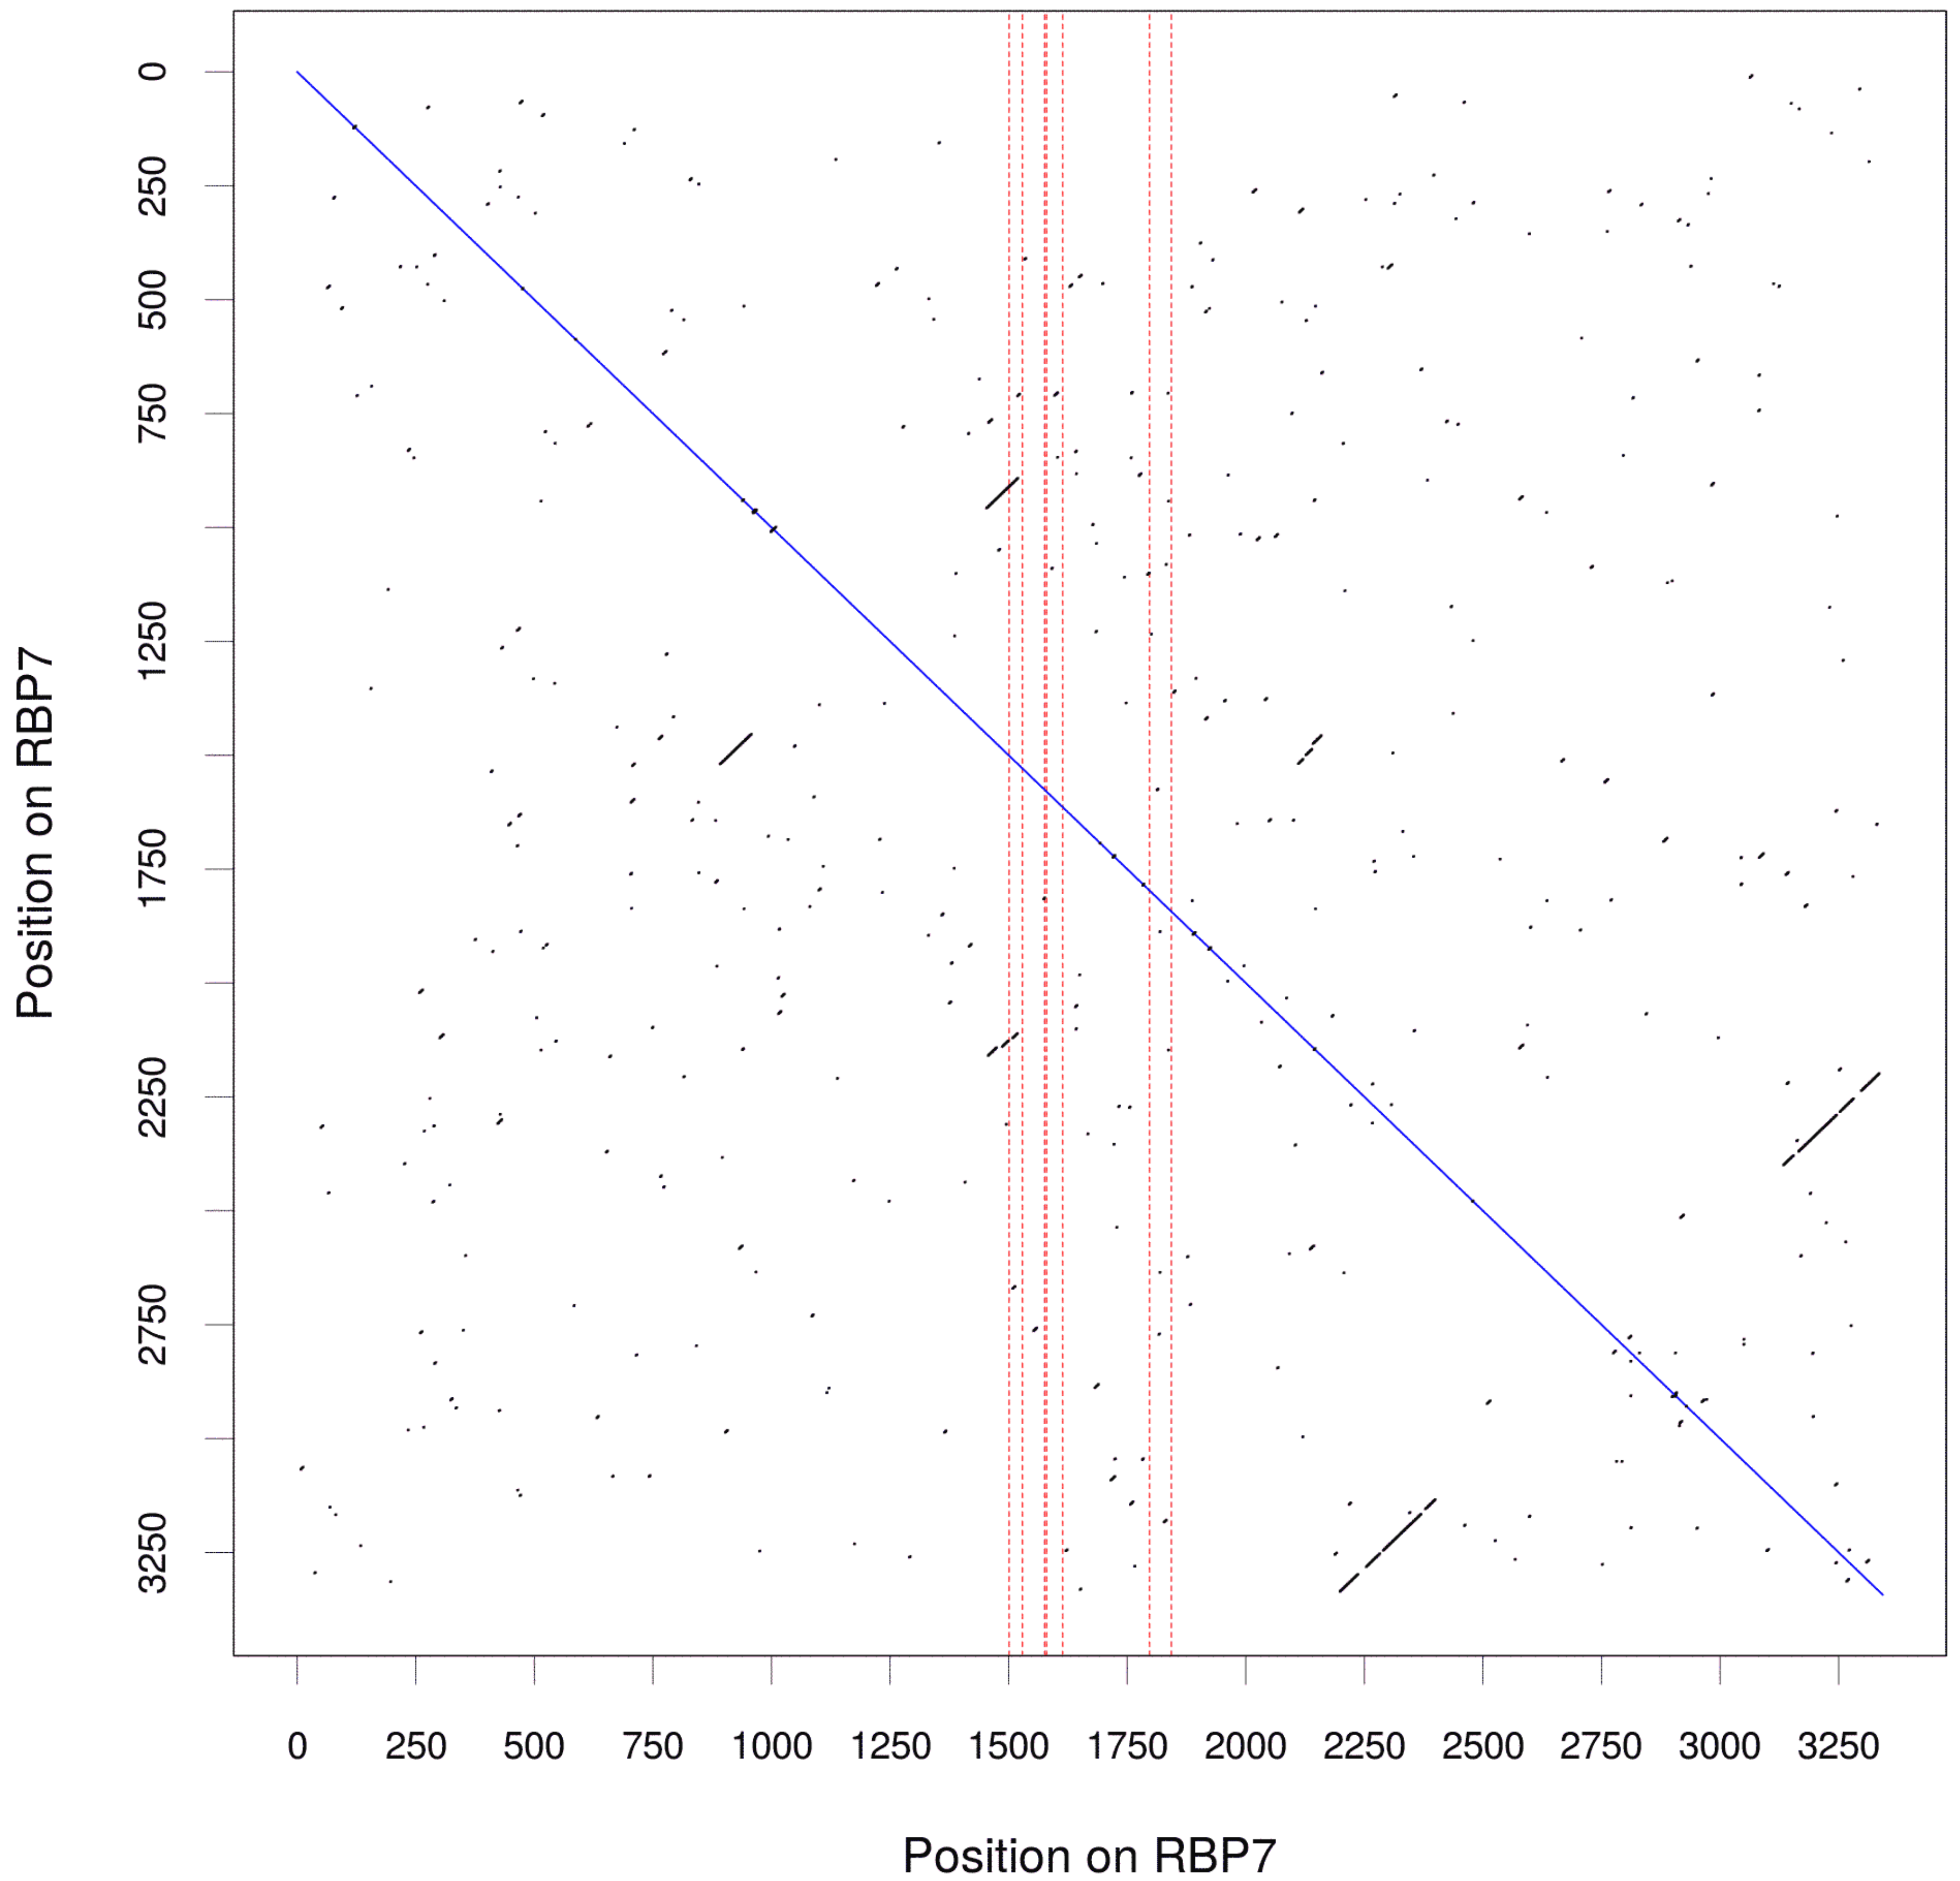

# RCHY1

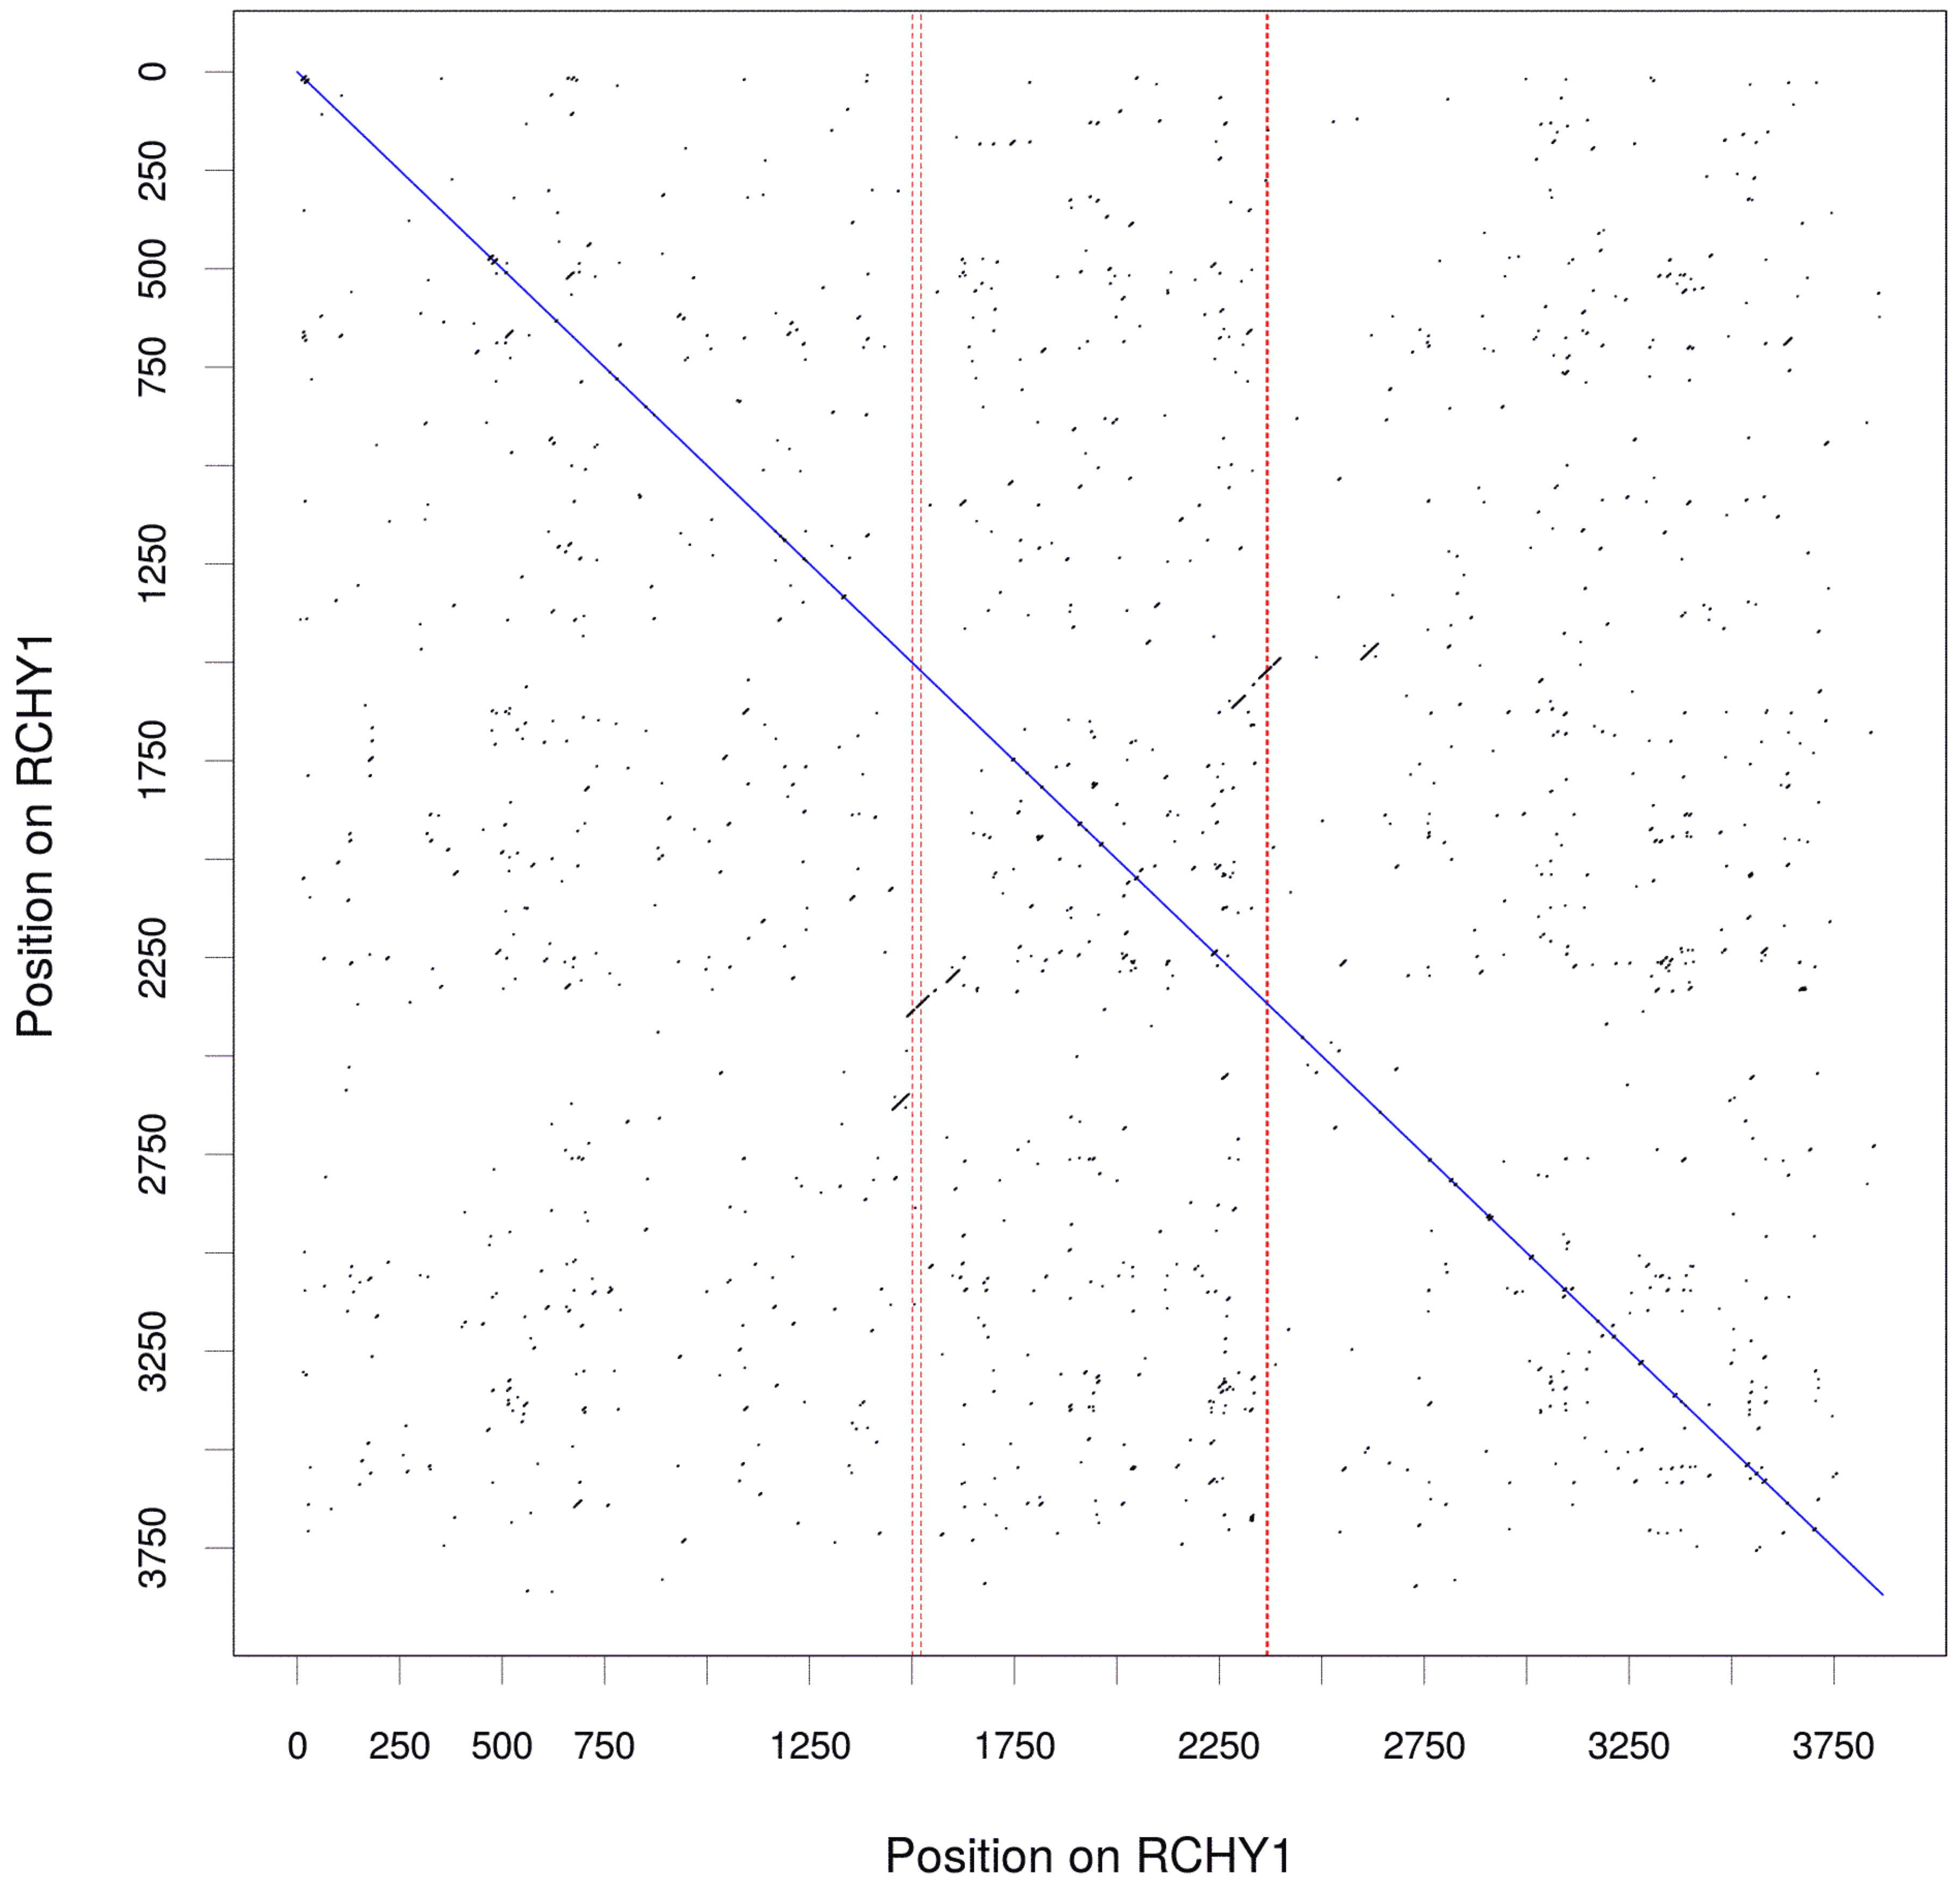

# RETSAT

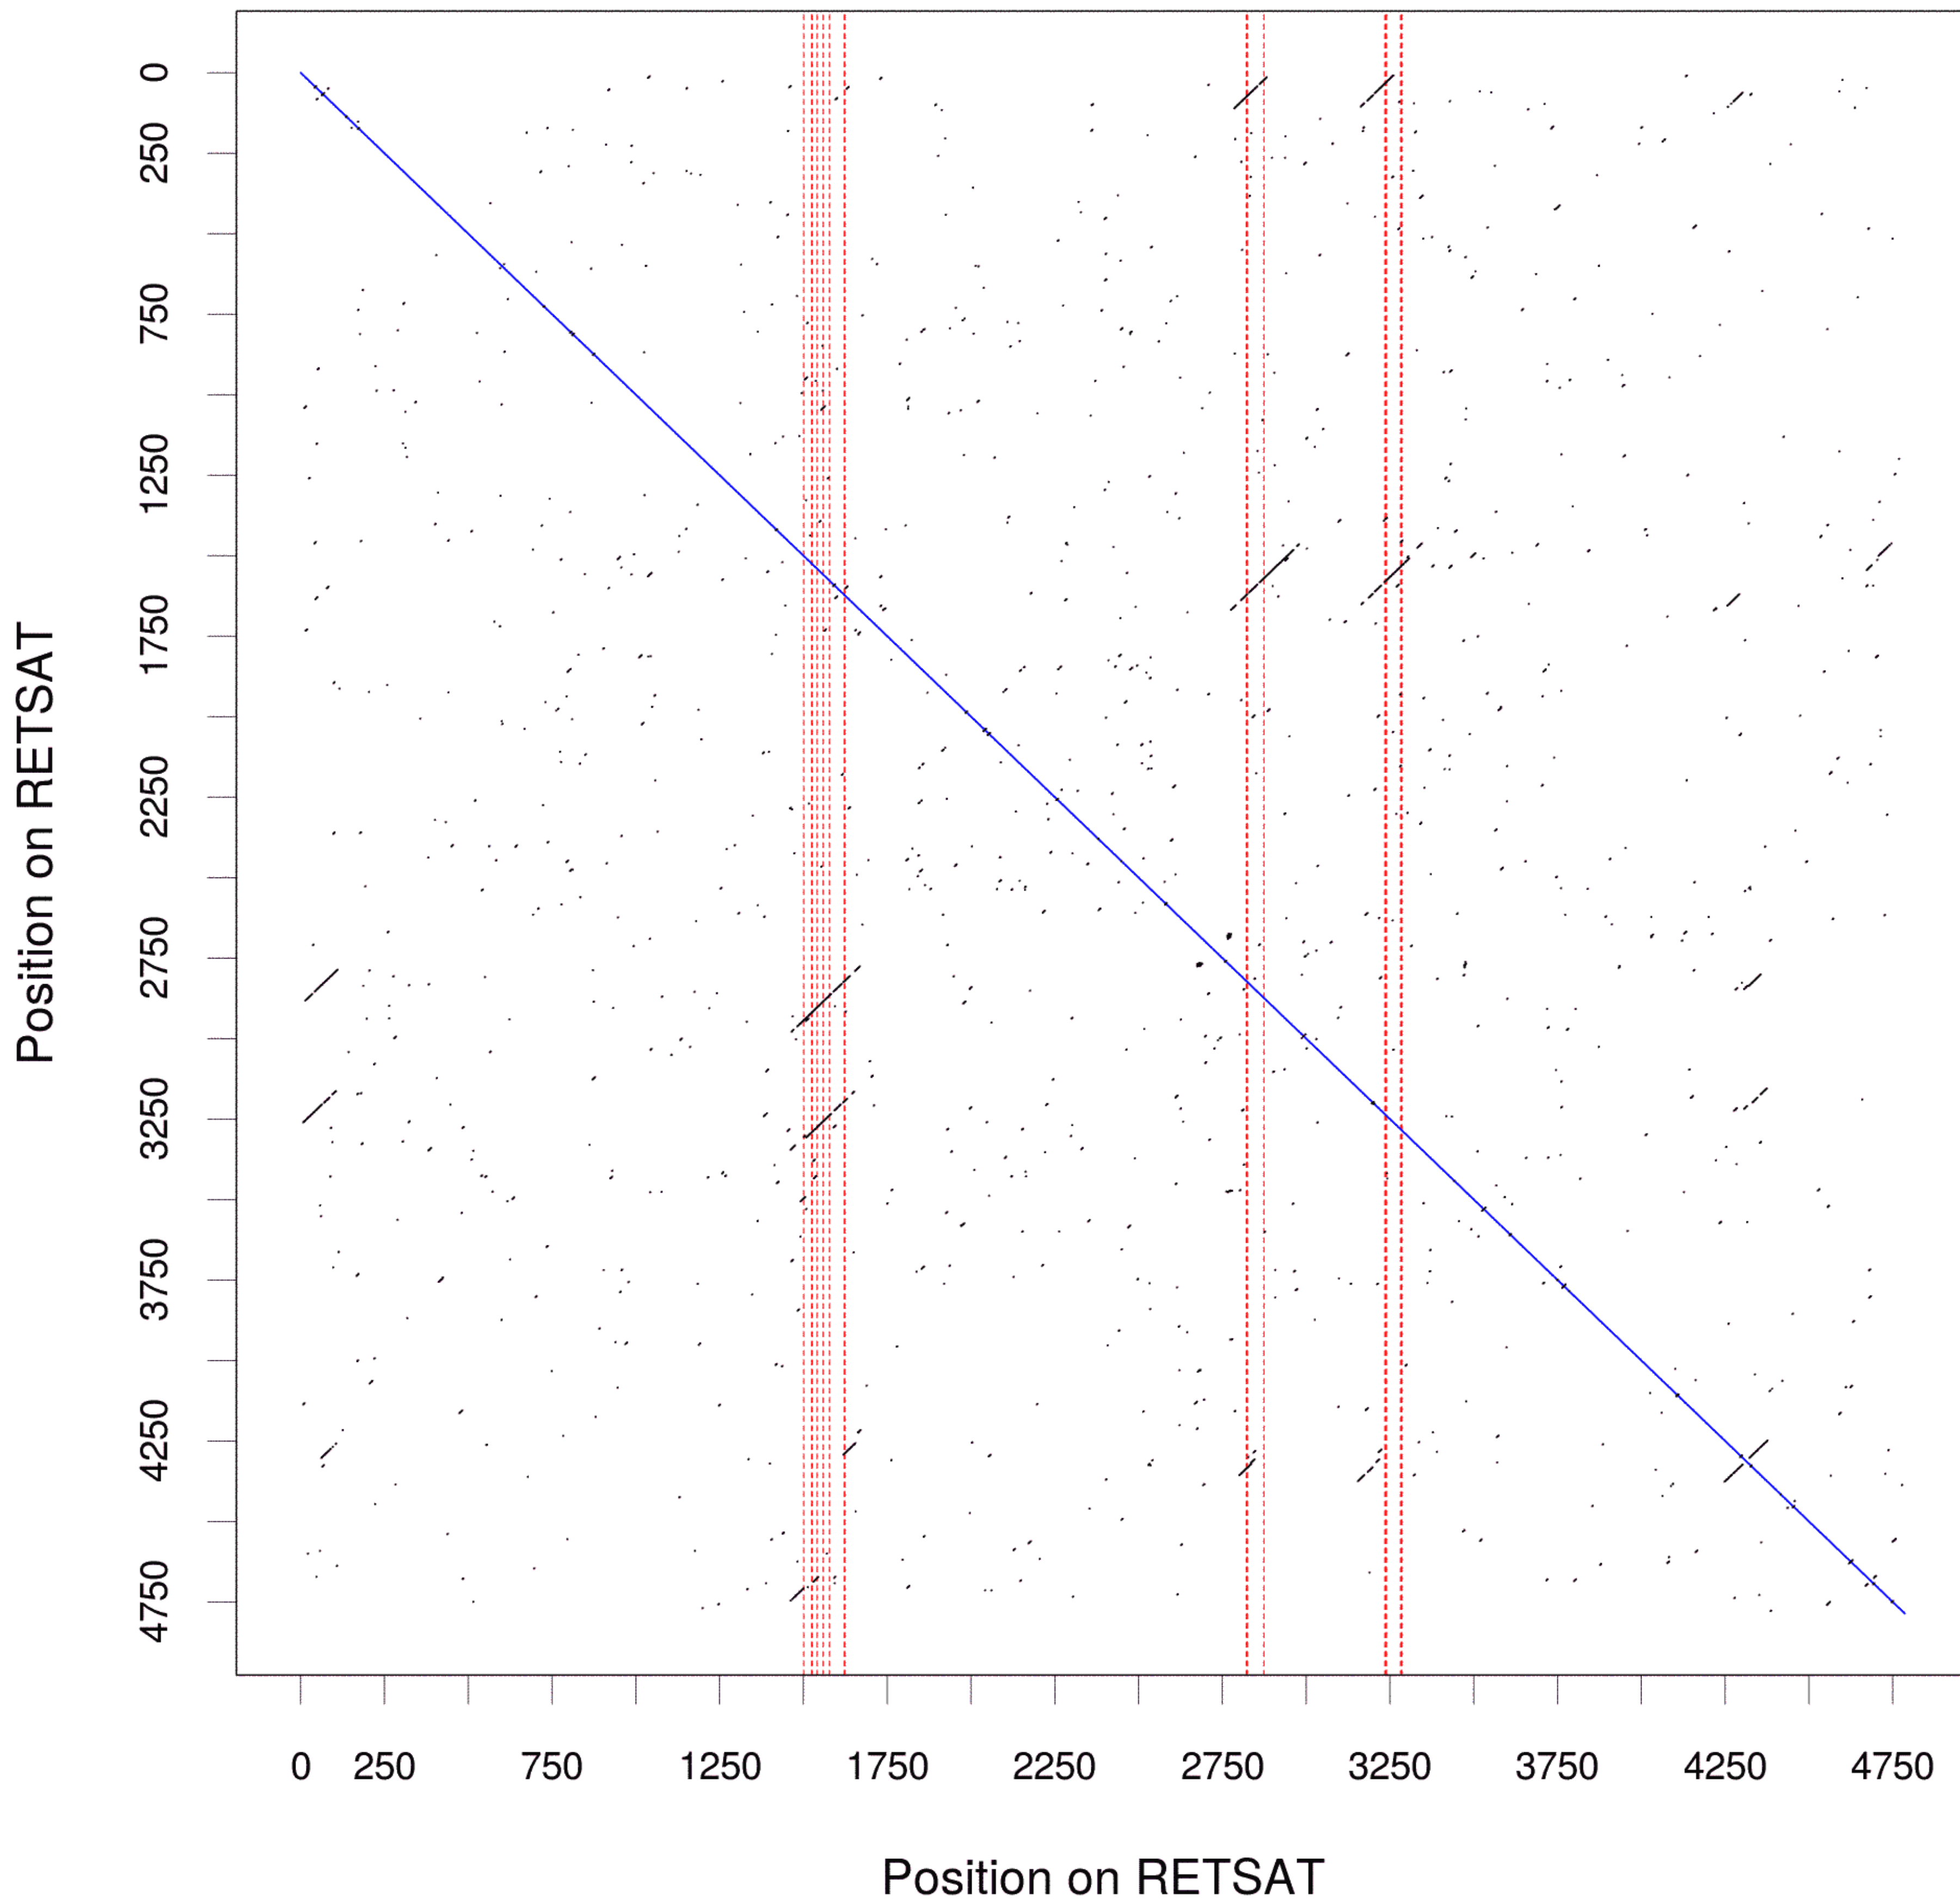



# RGCC

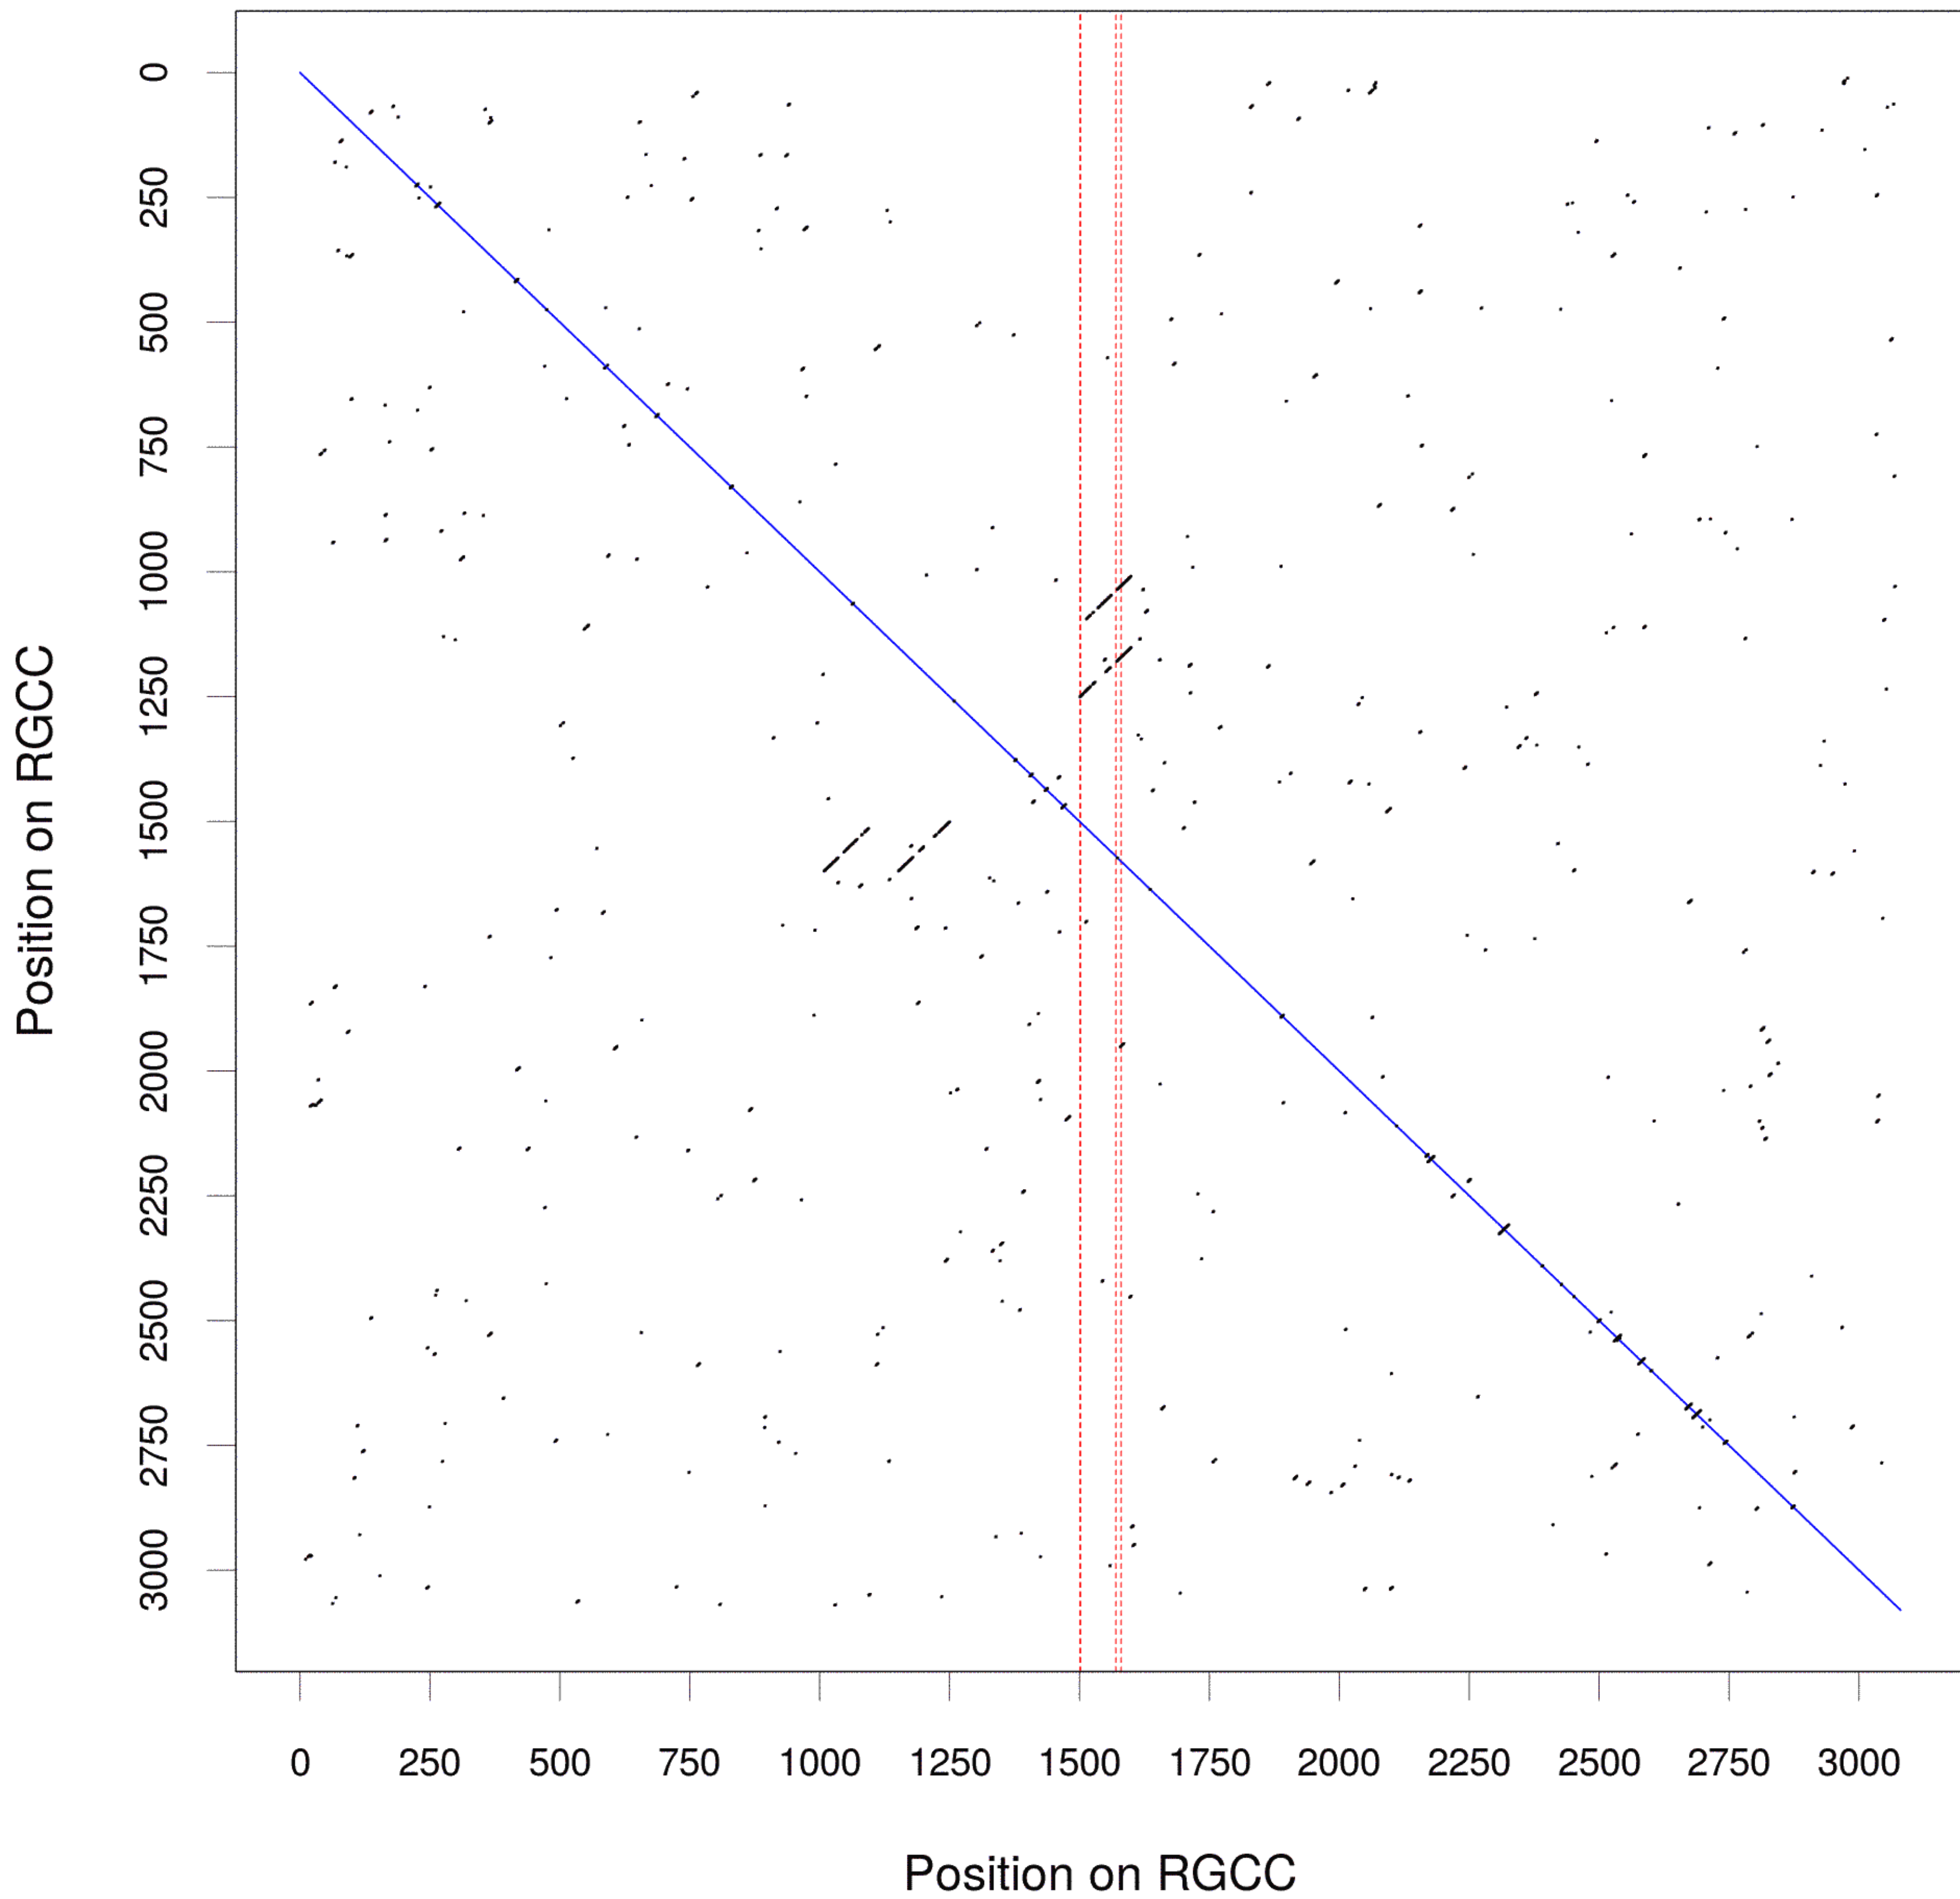

# RHBDF1

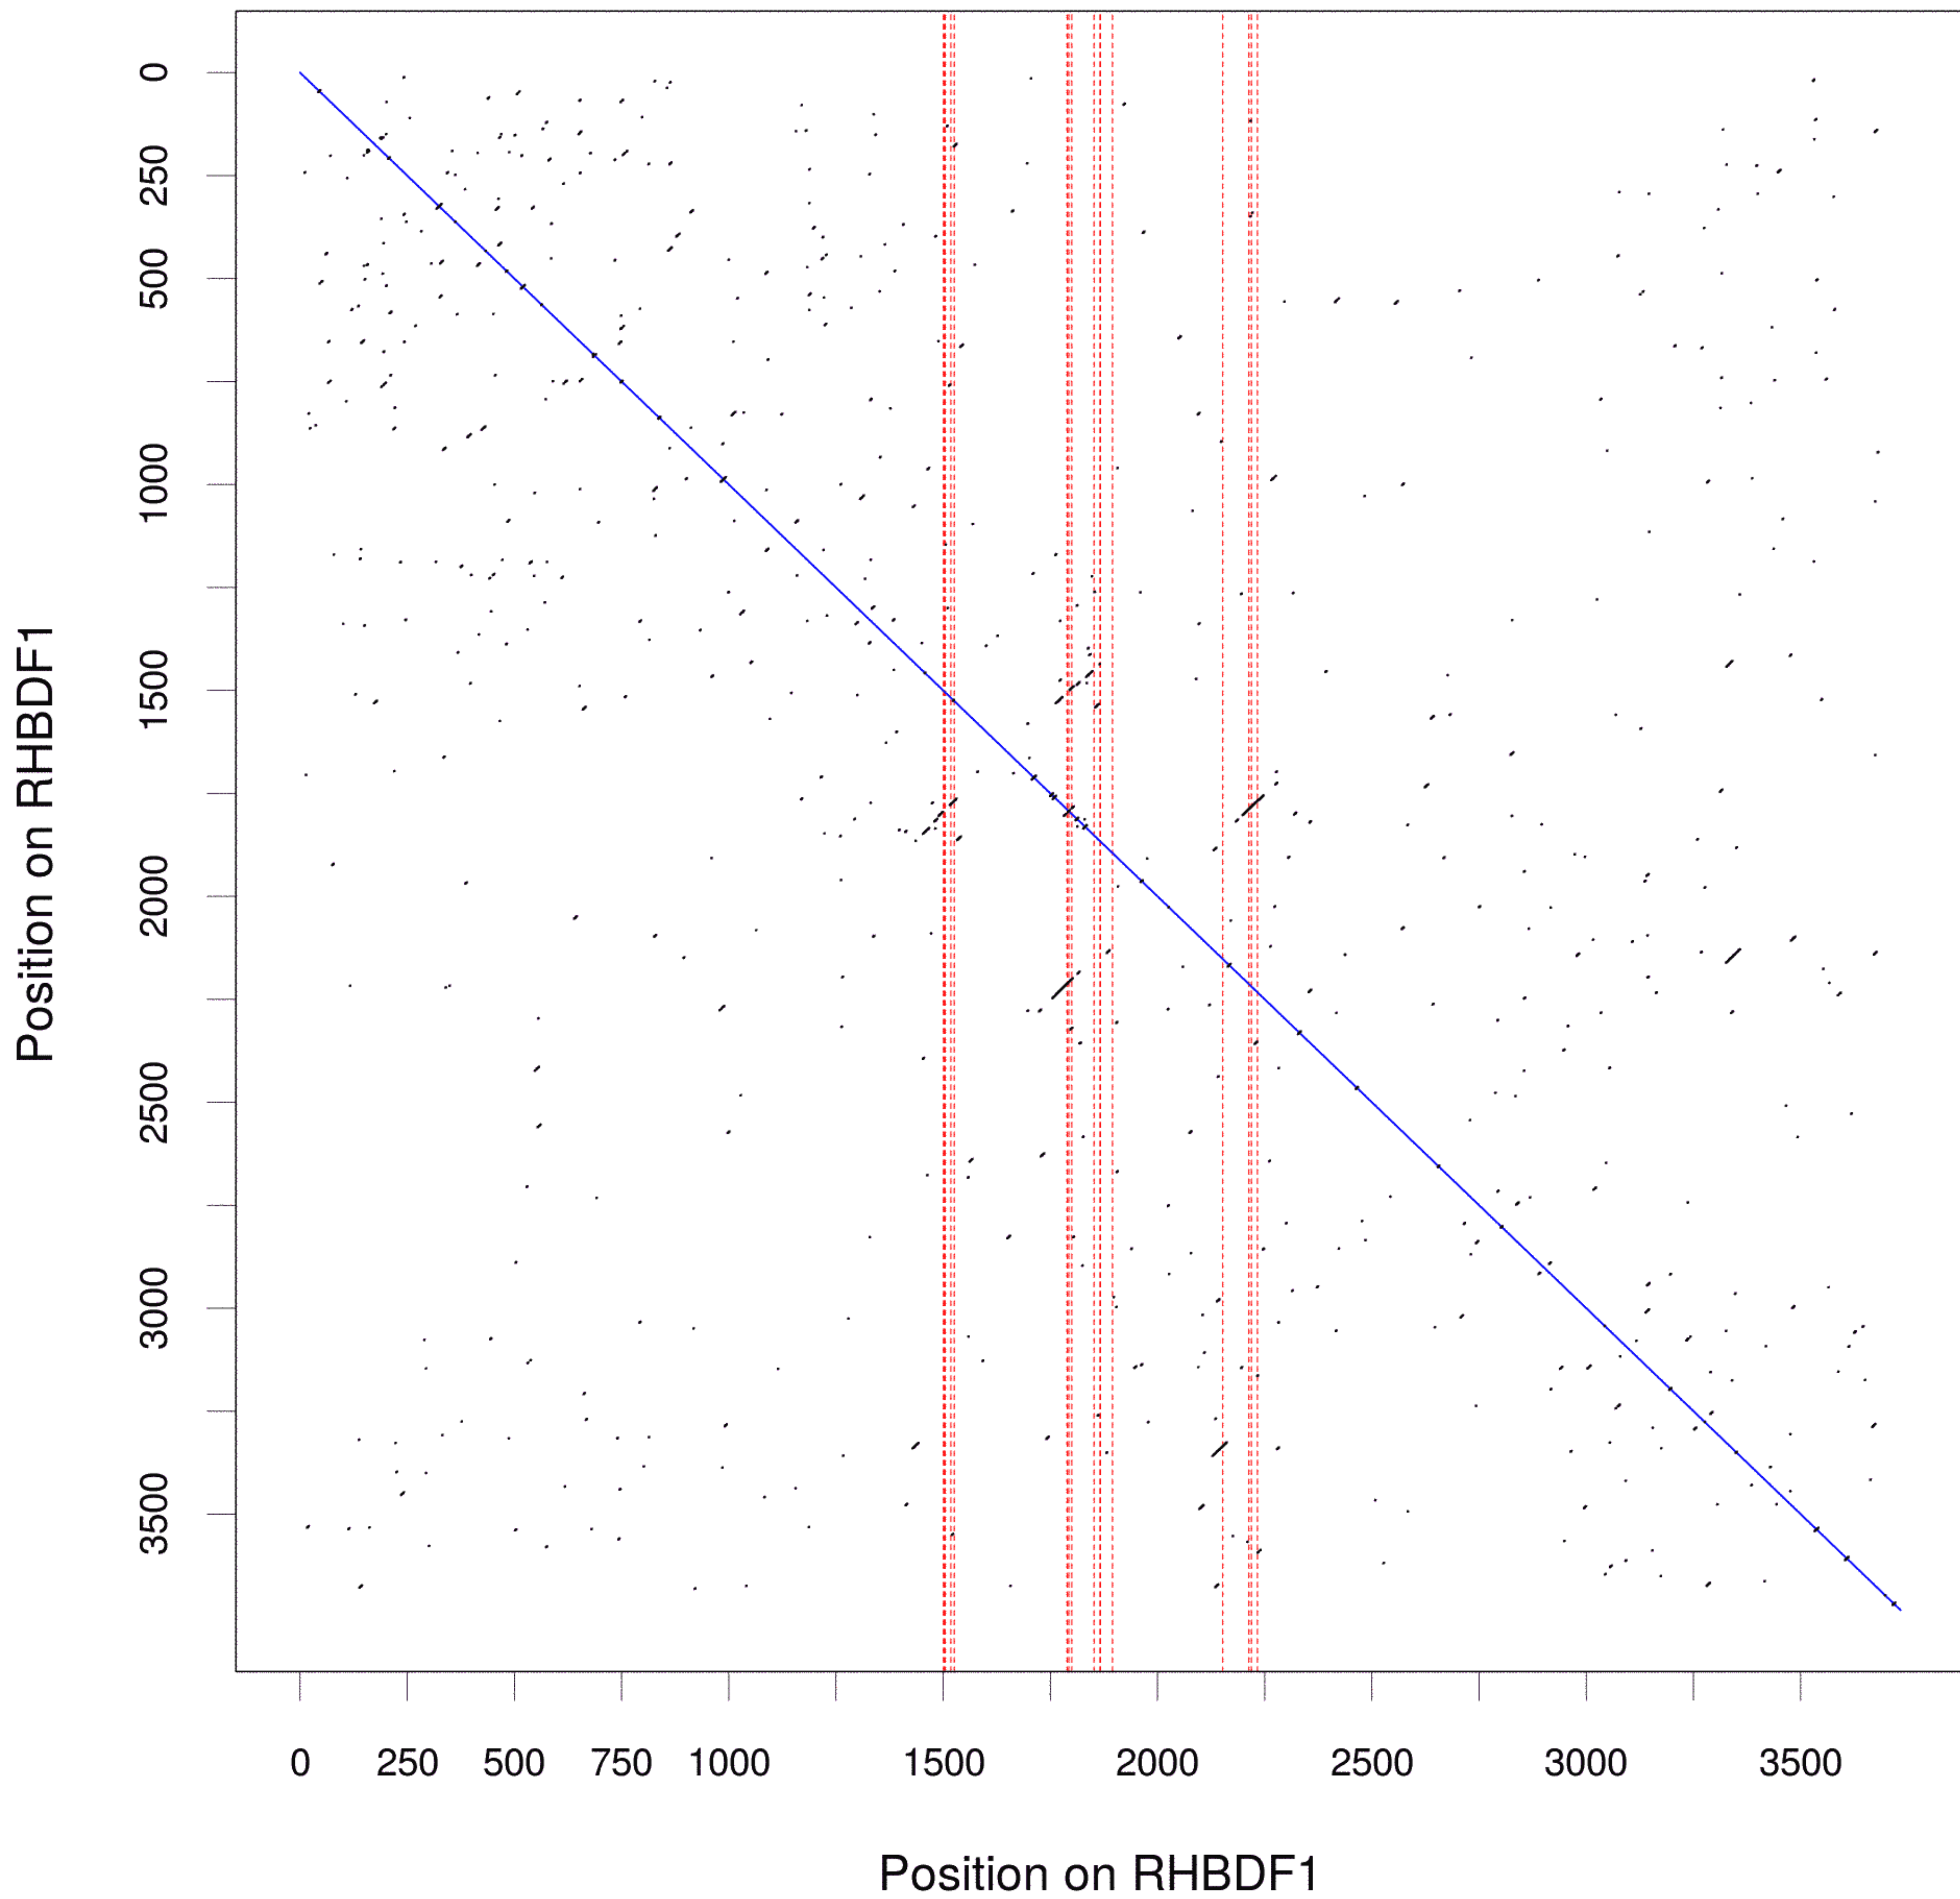

# RNASE4

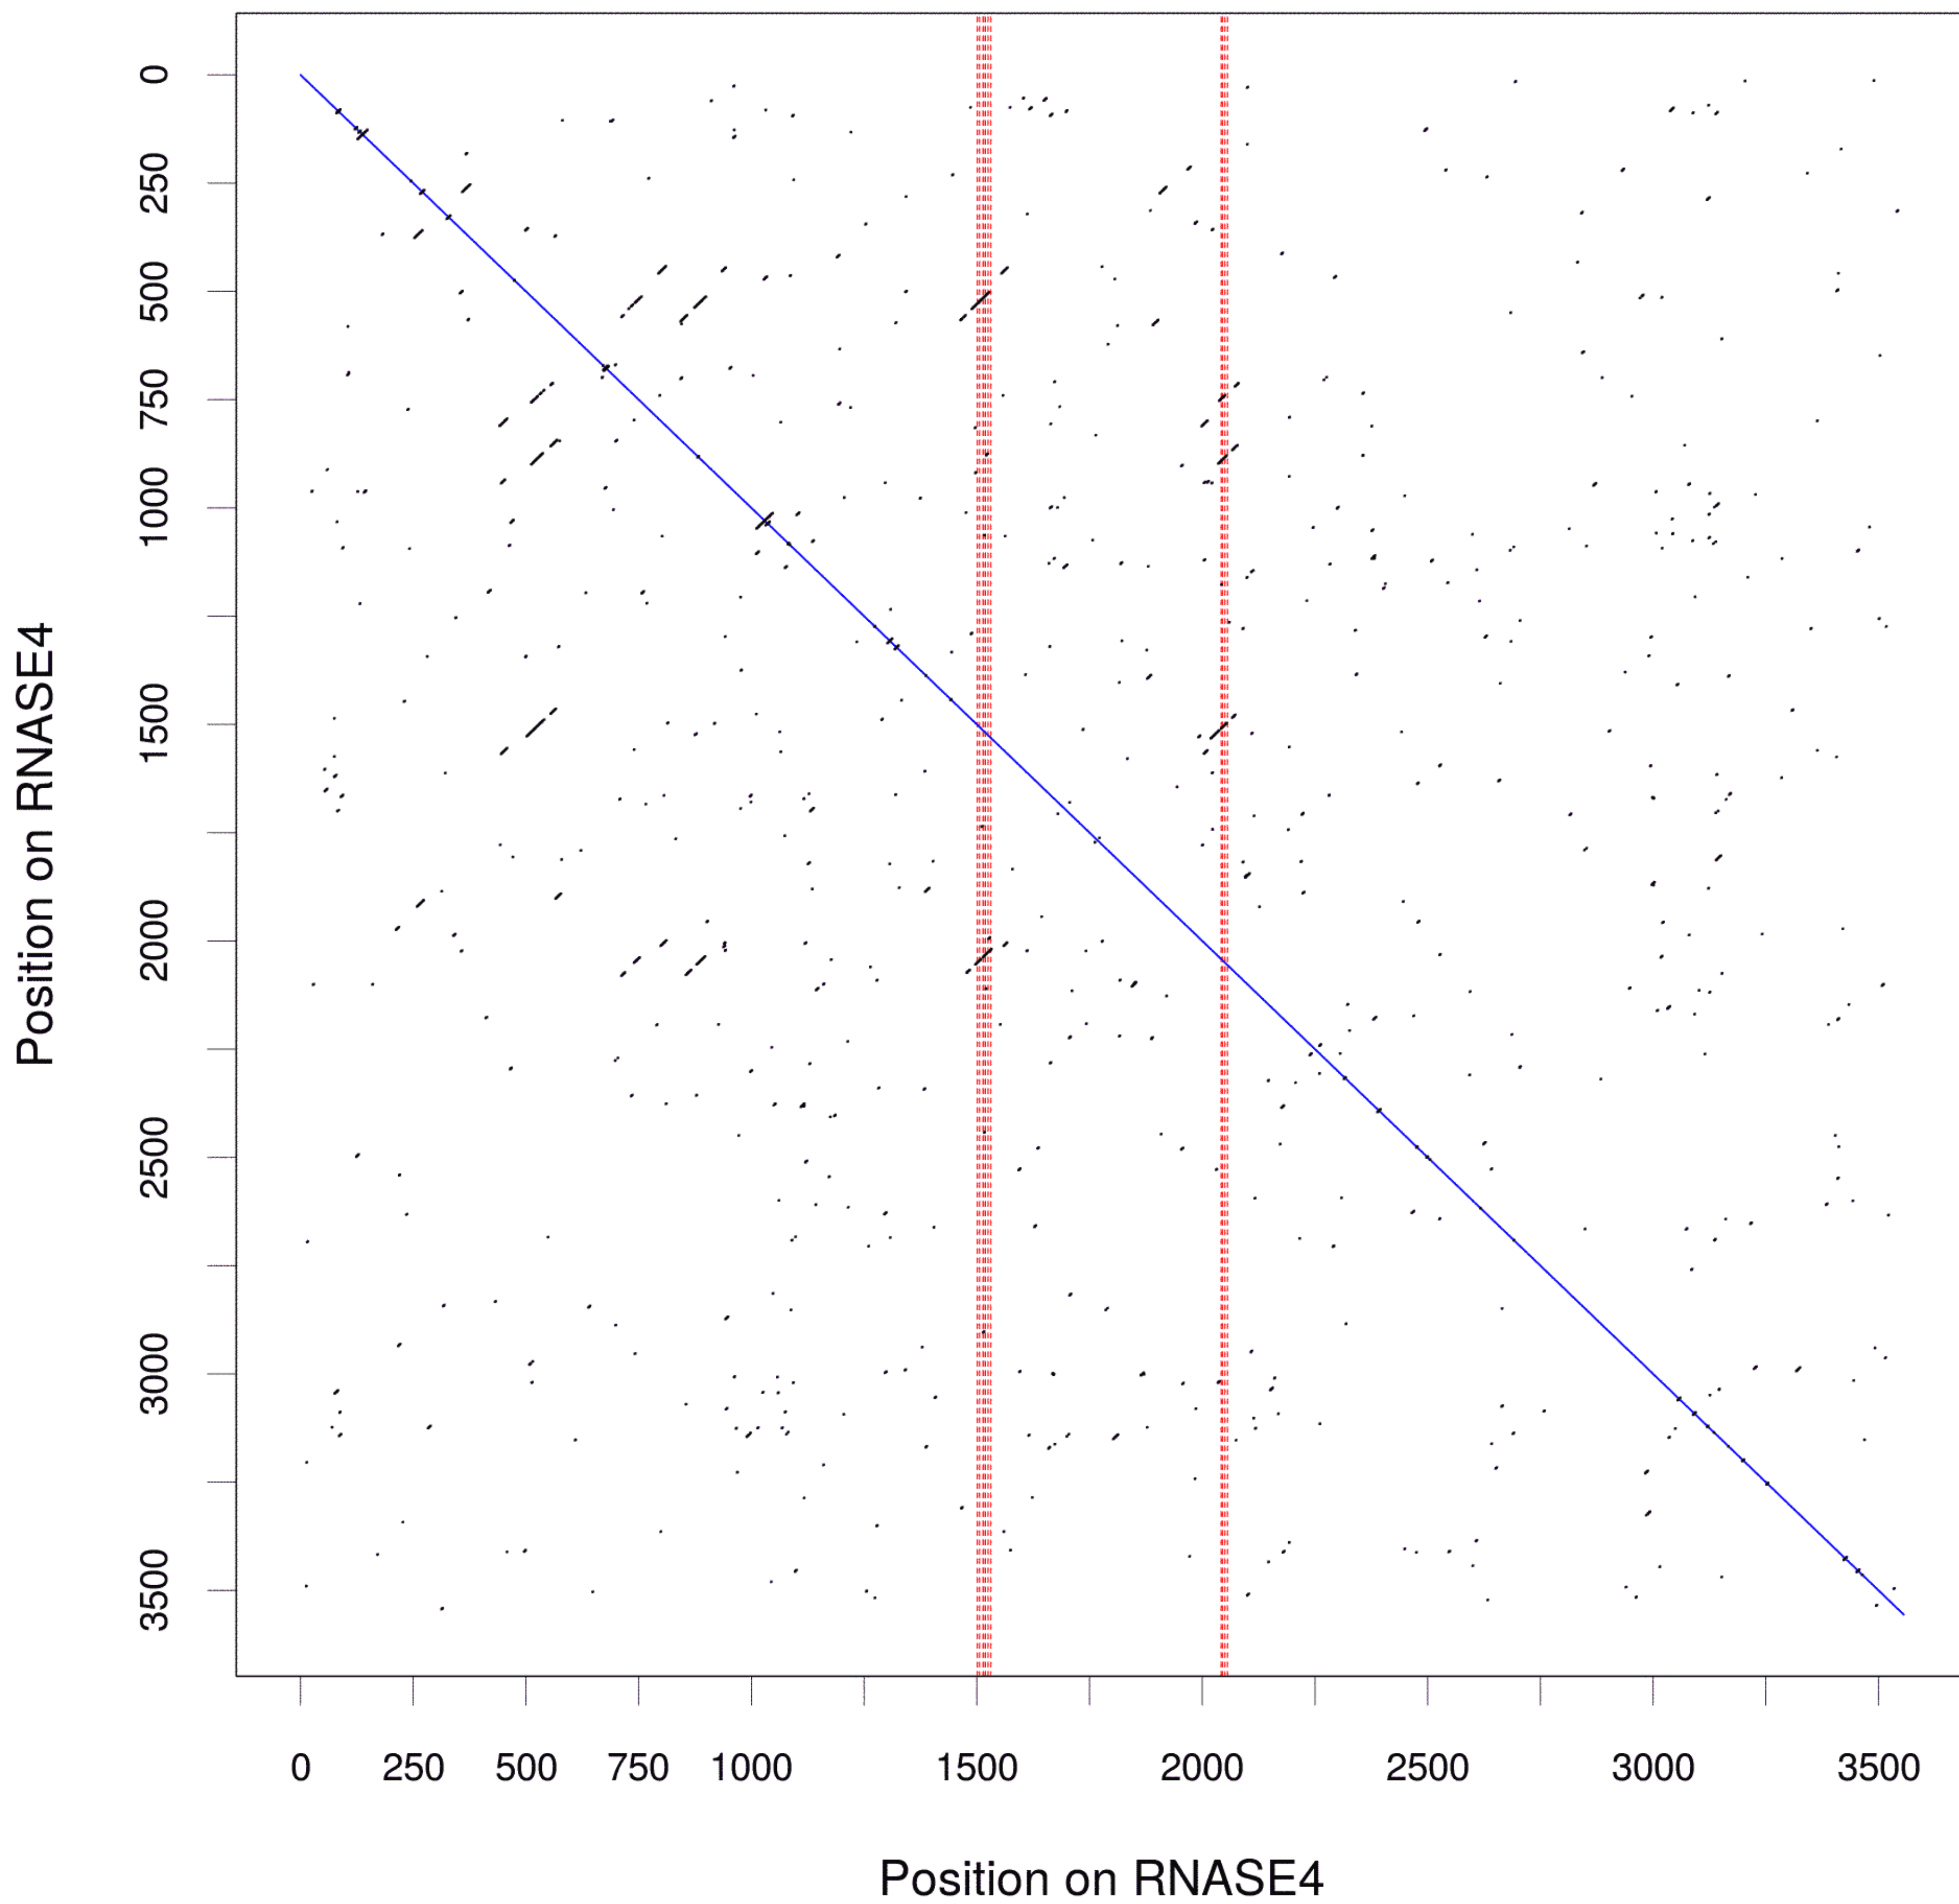

# RNF4

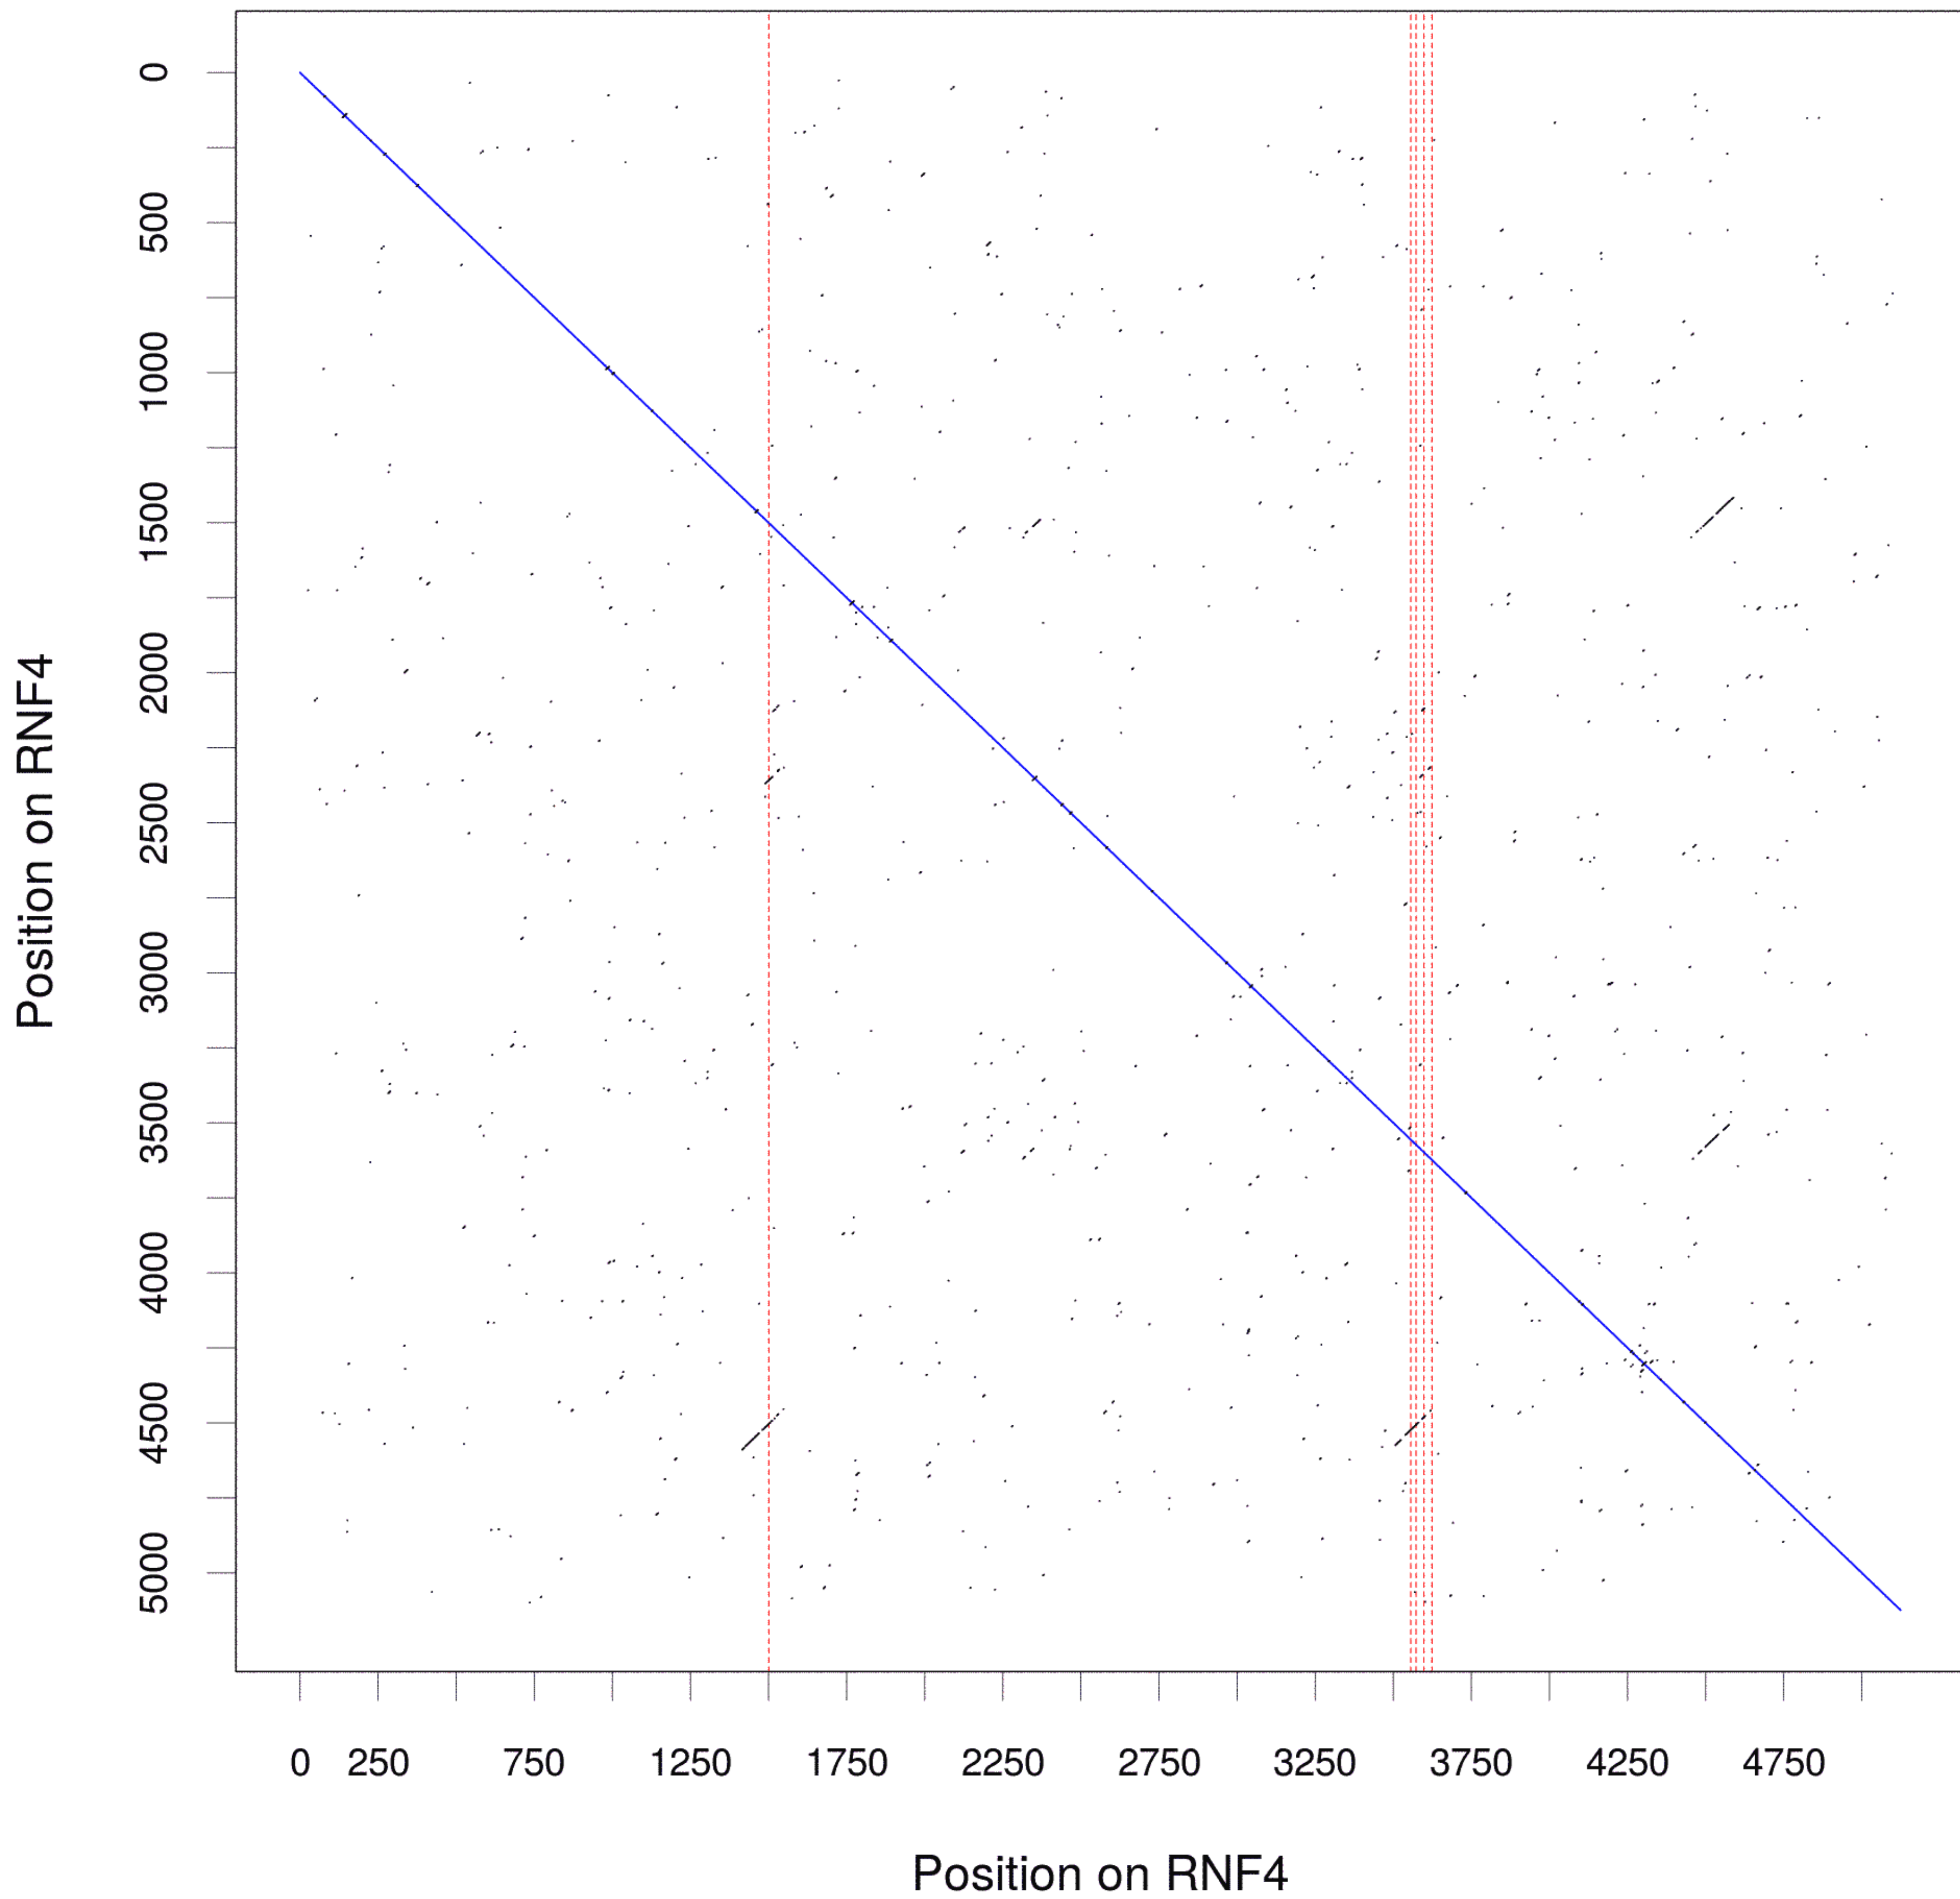

# RNF31

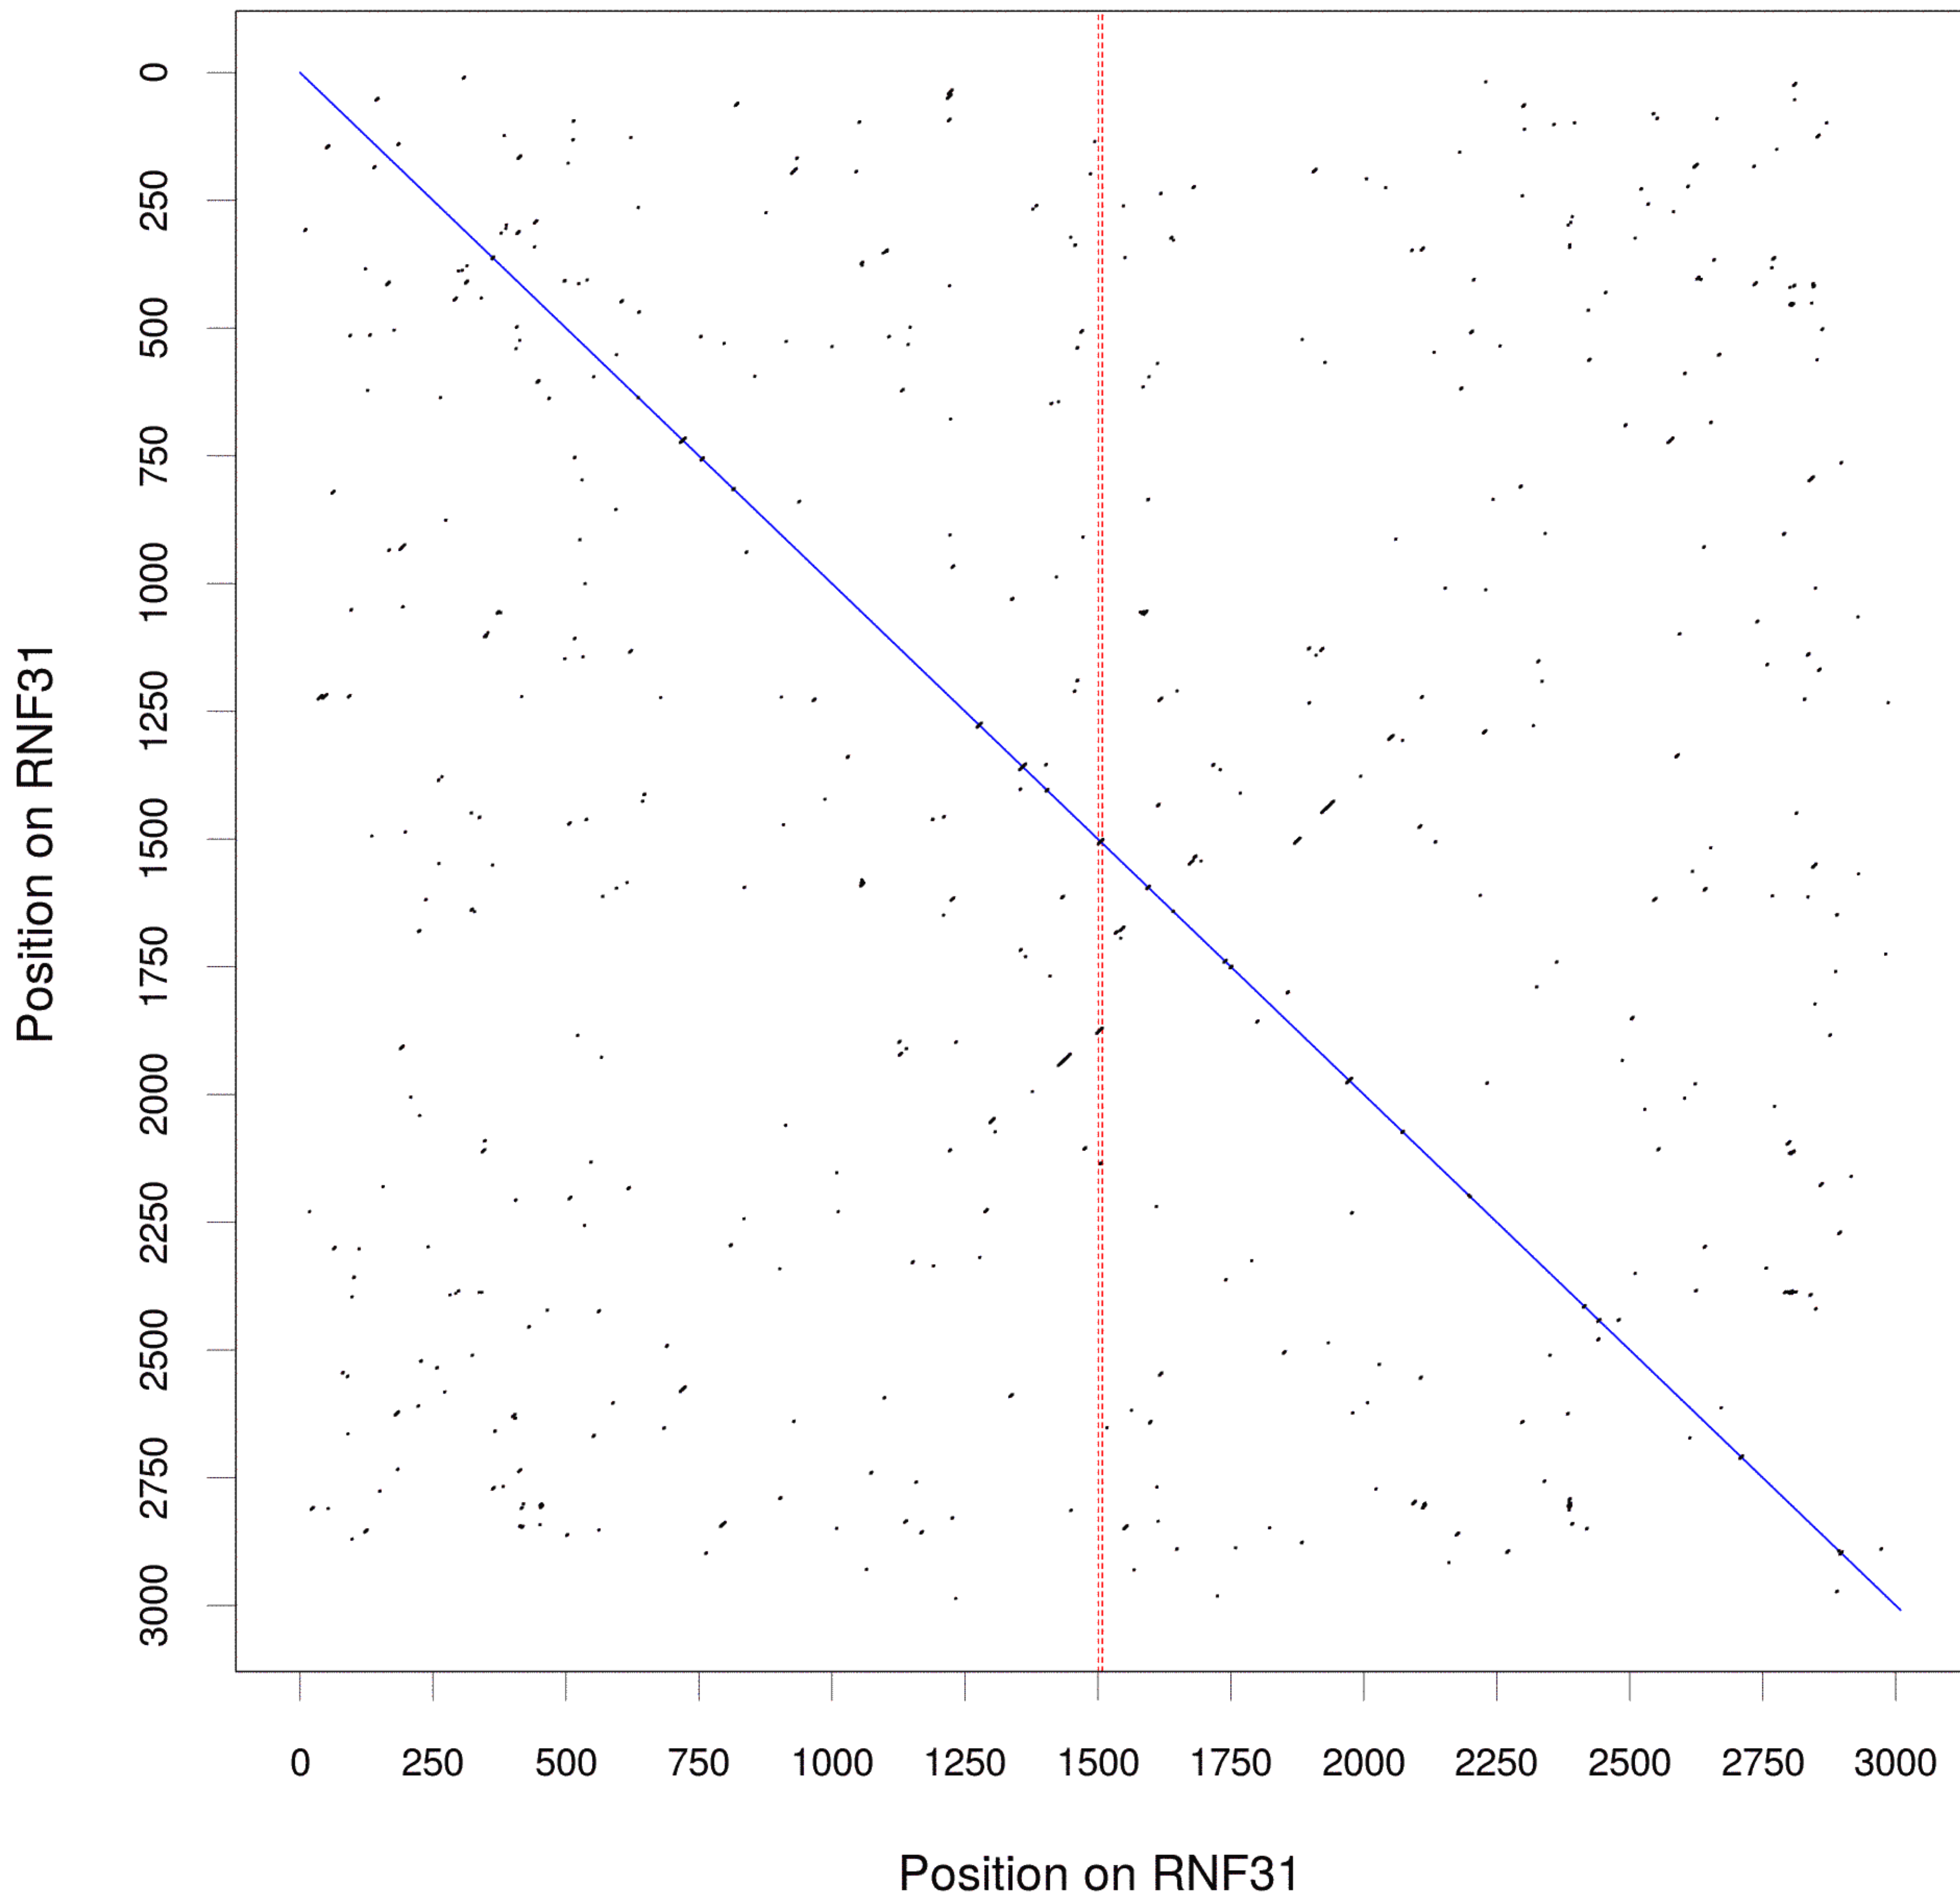

# RNF44

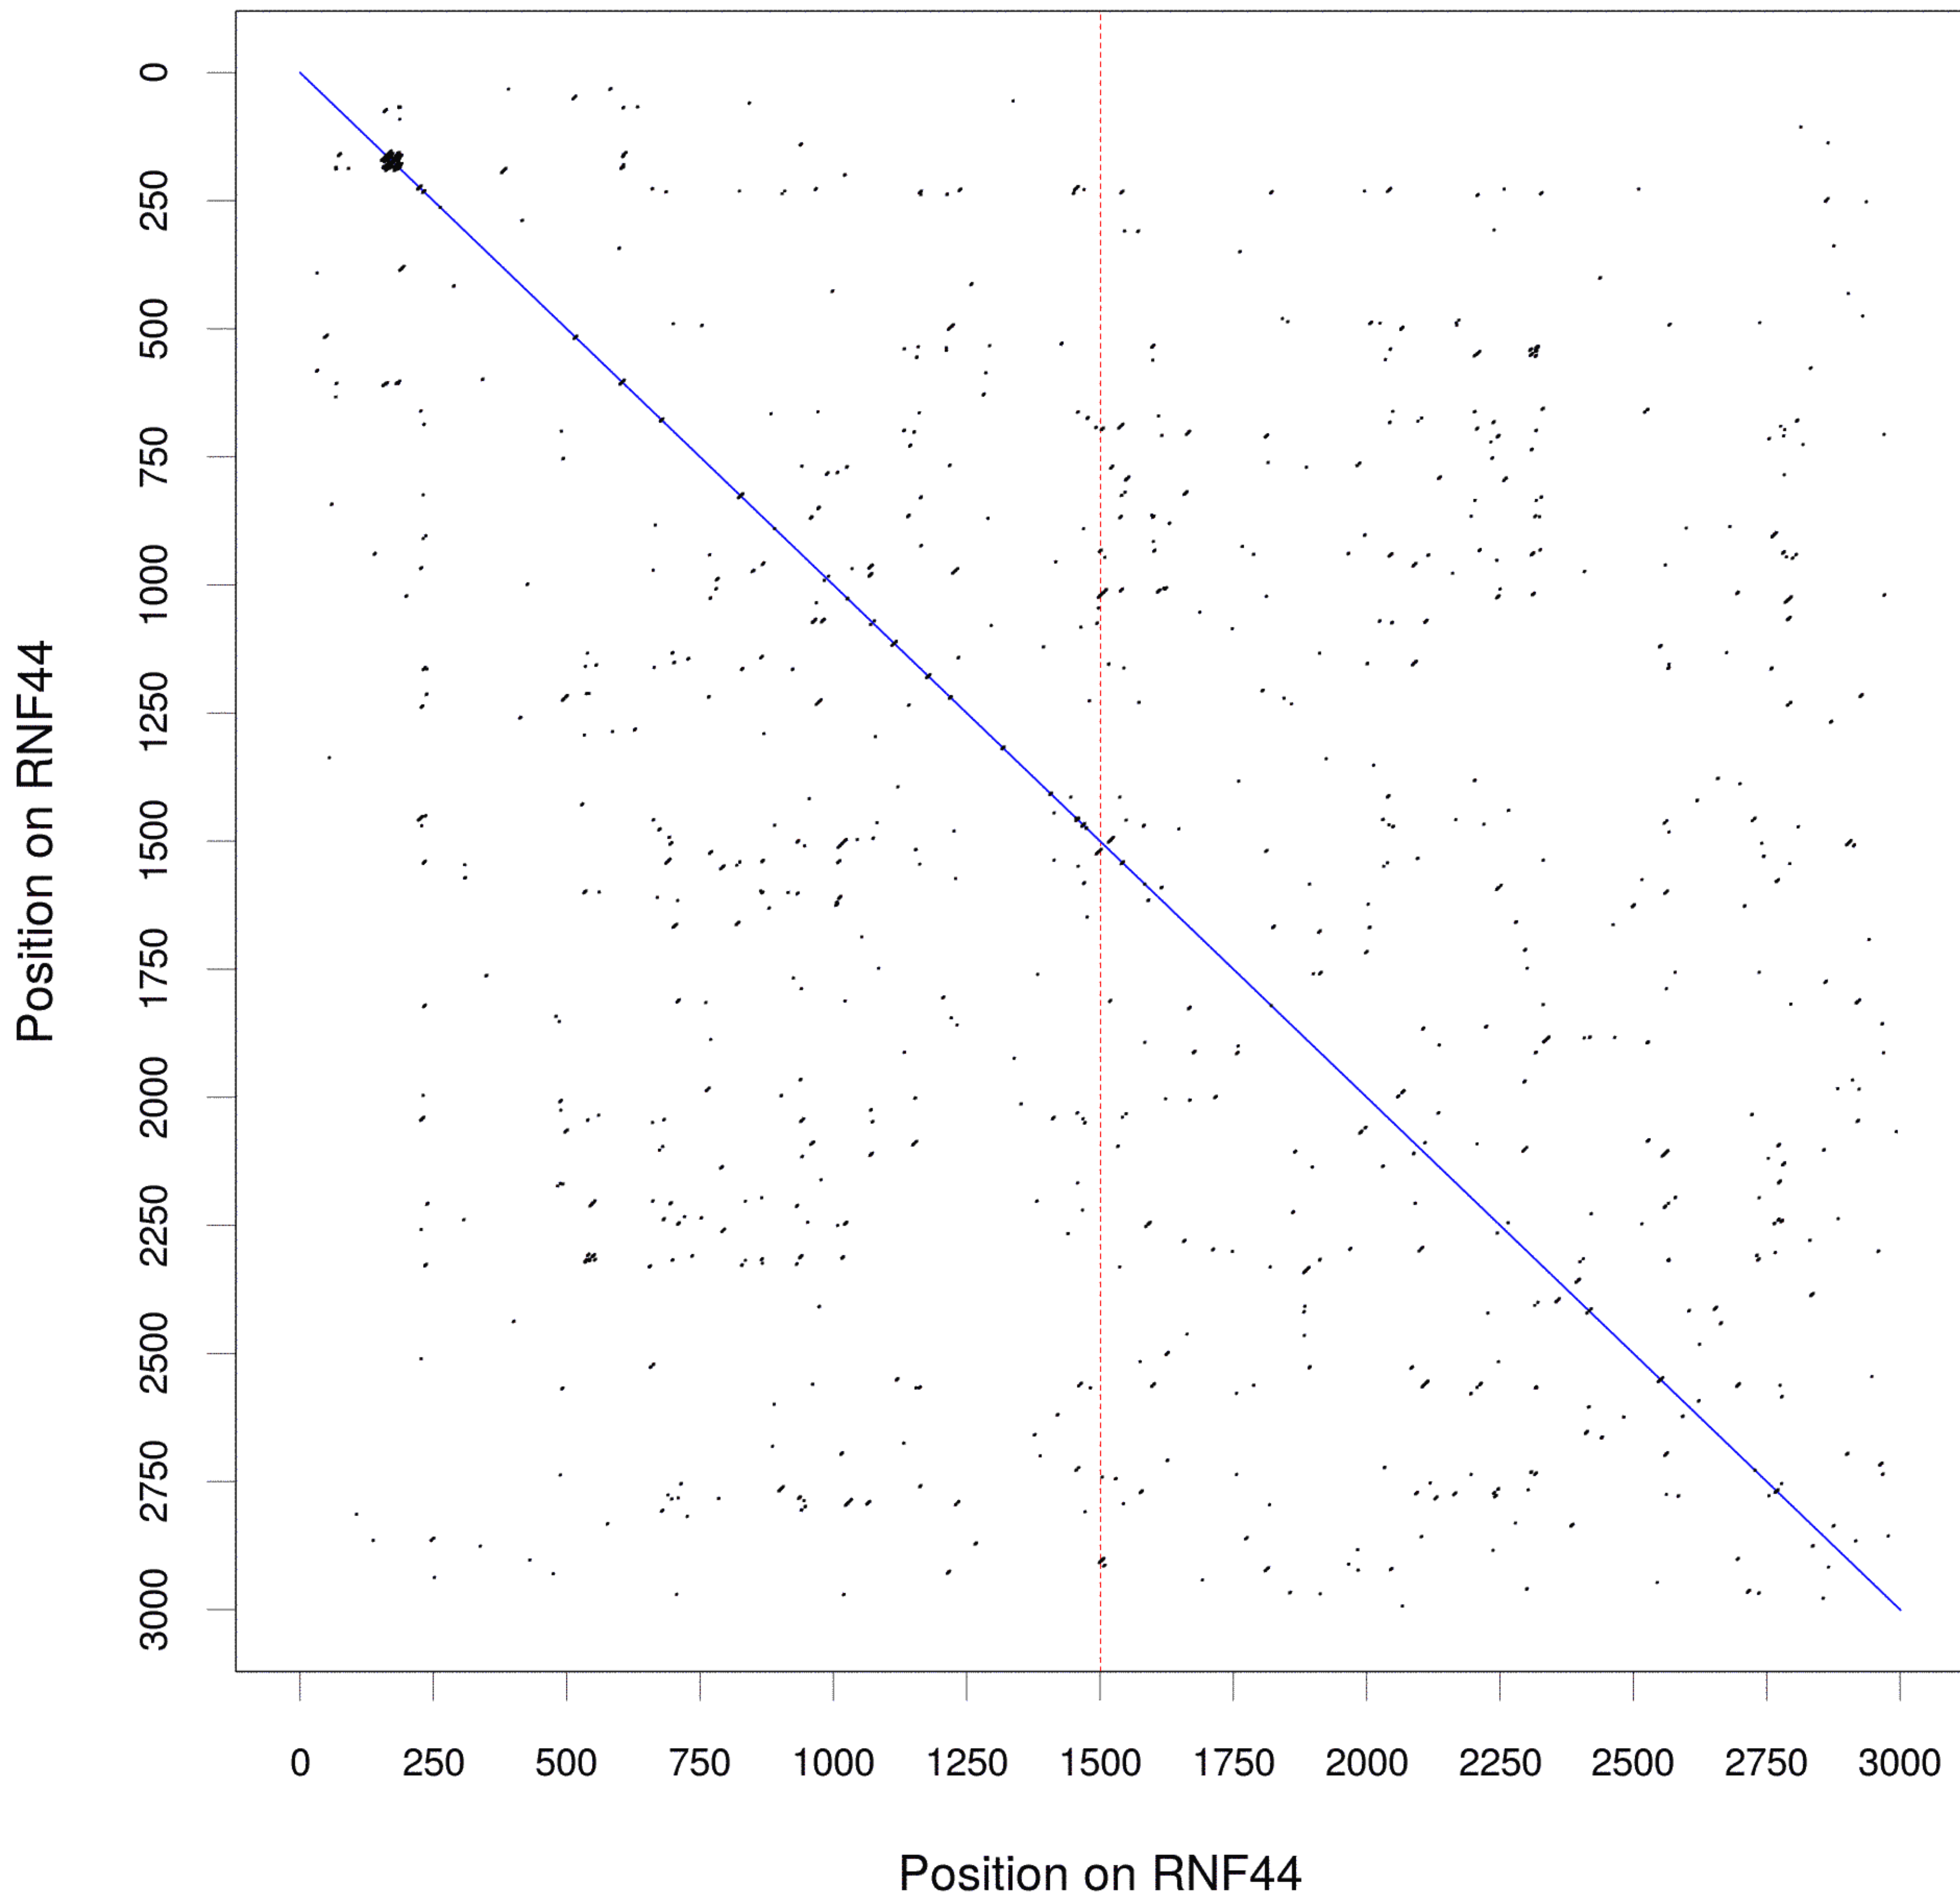

# RNF115

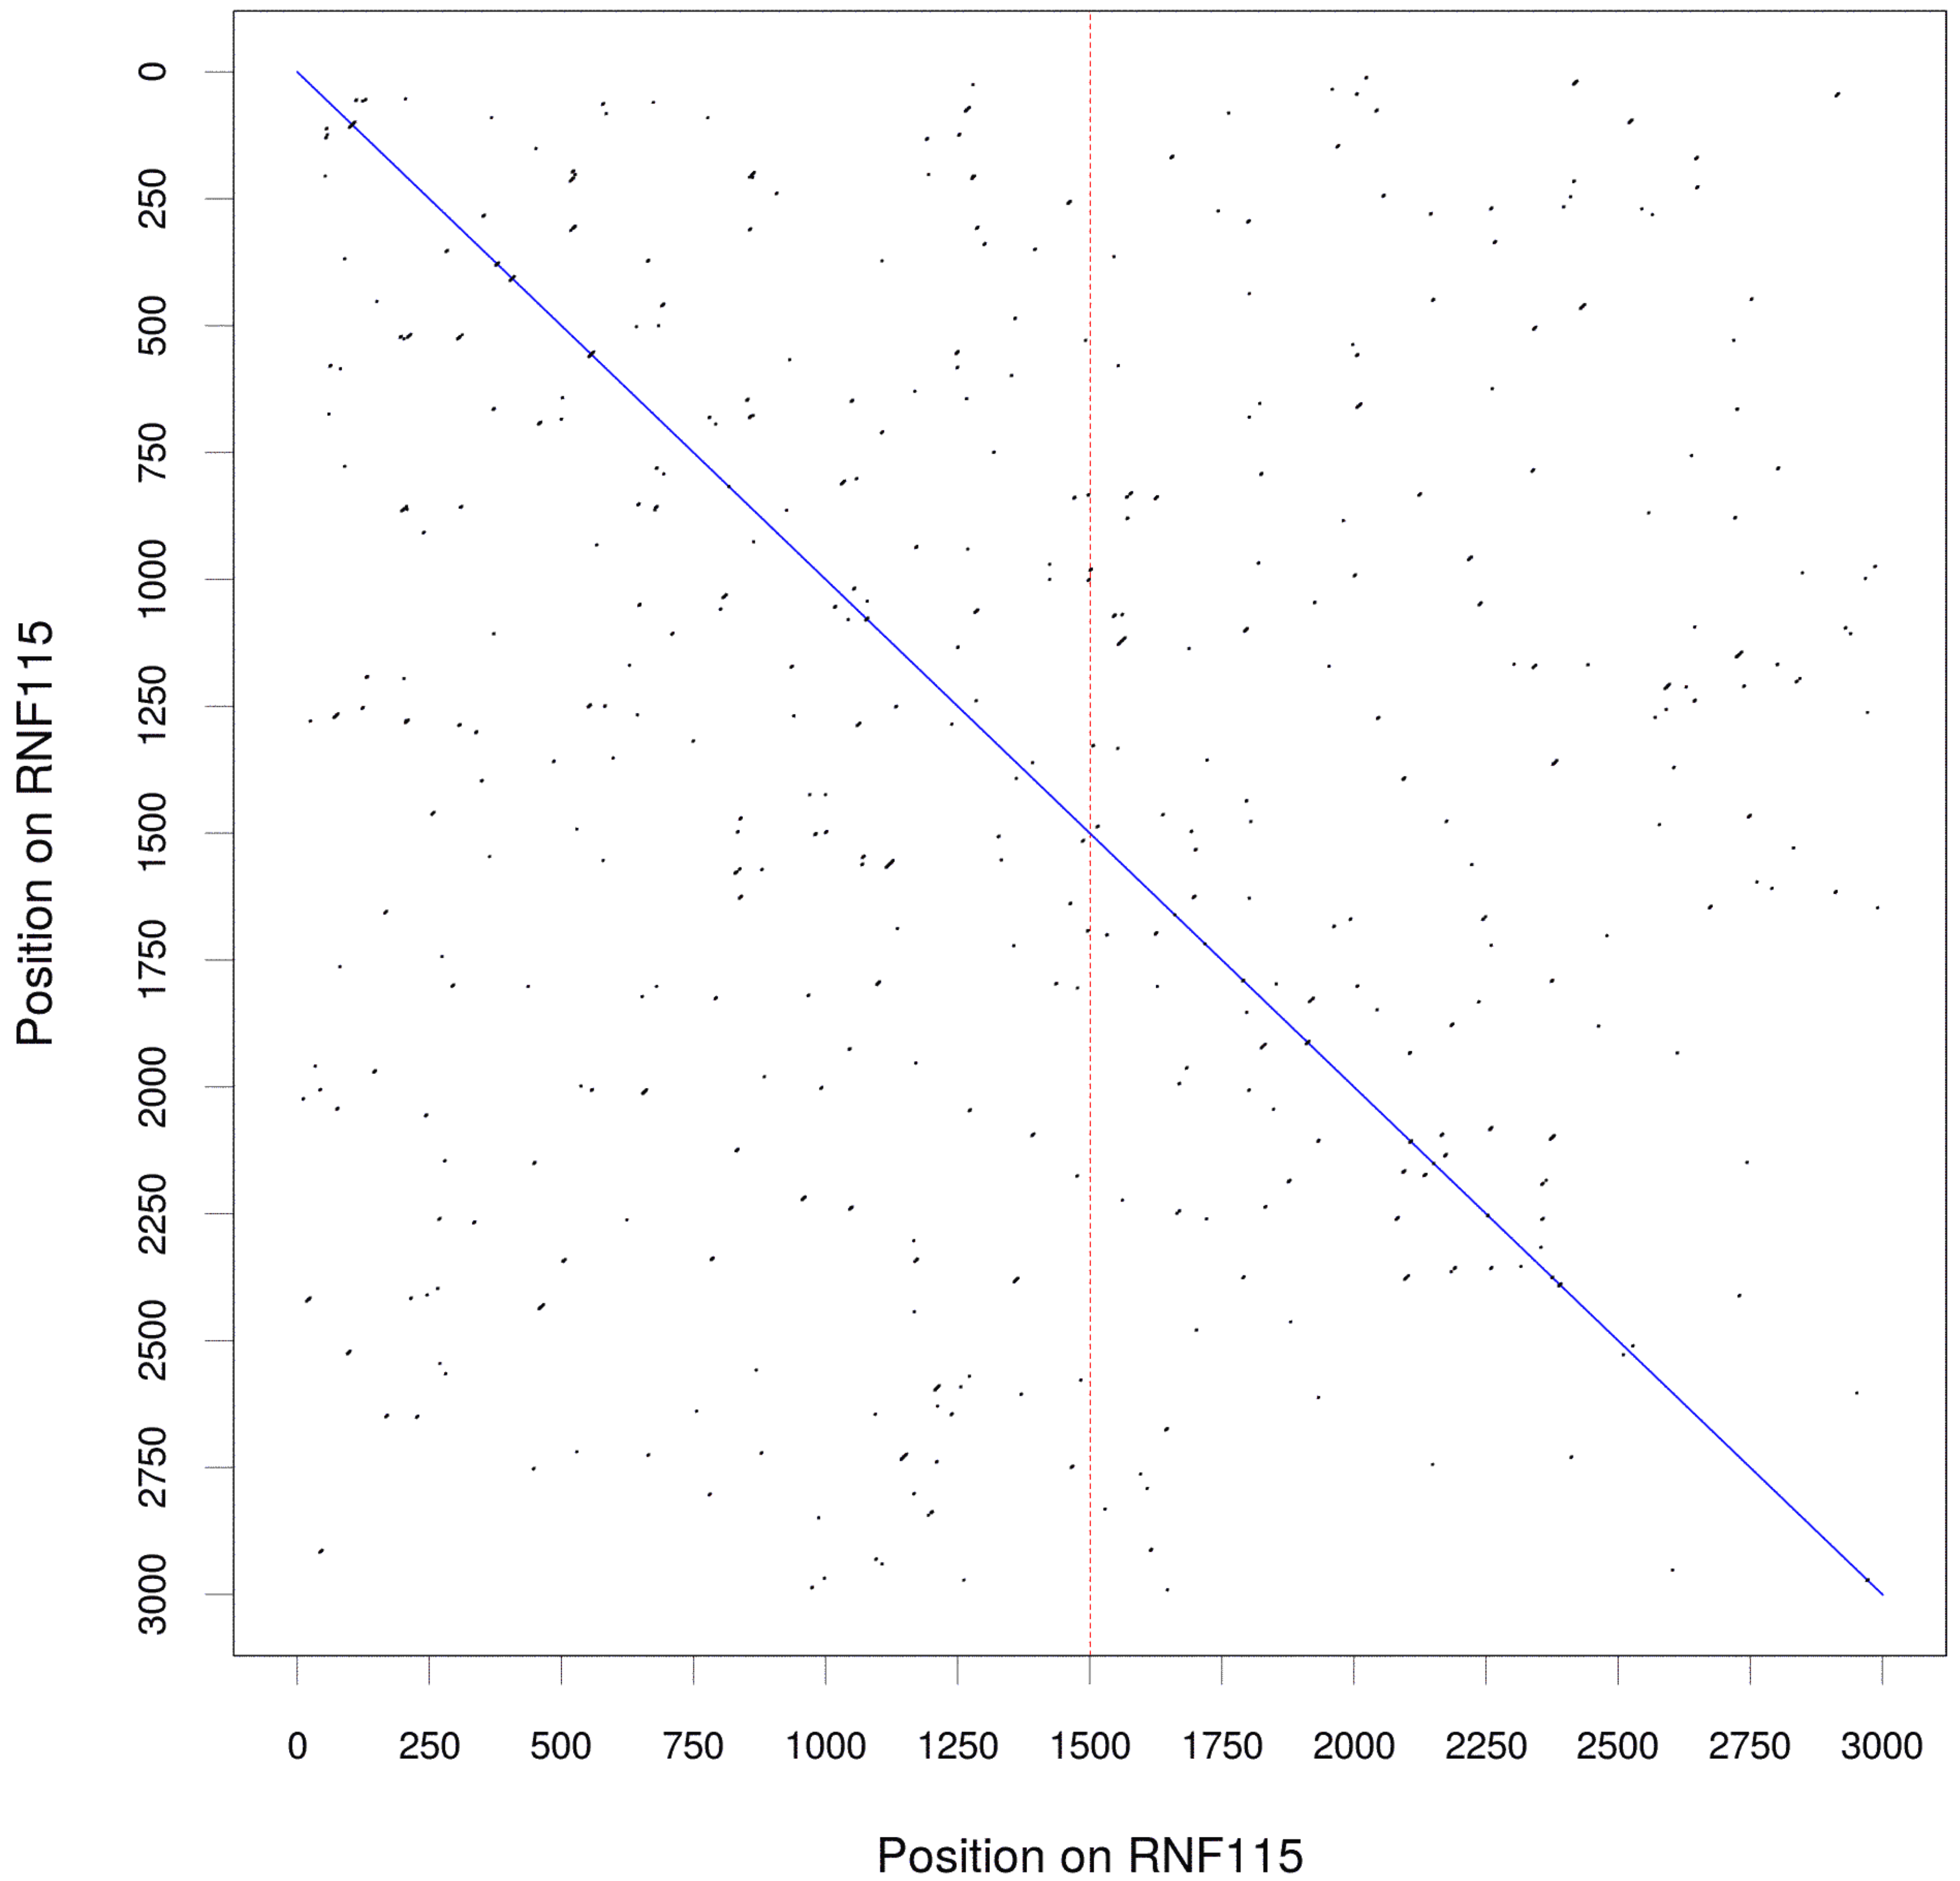

# RNF130

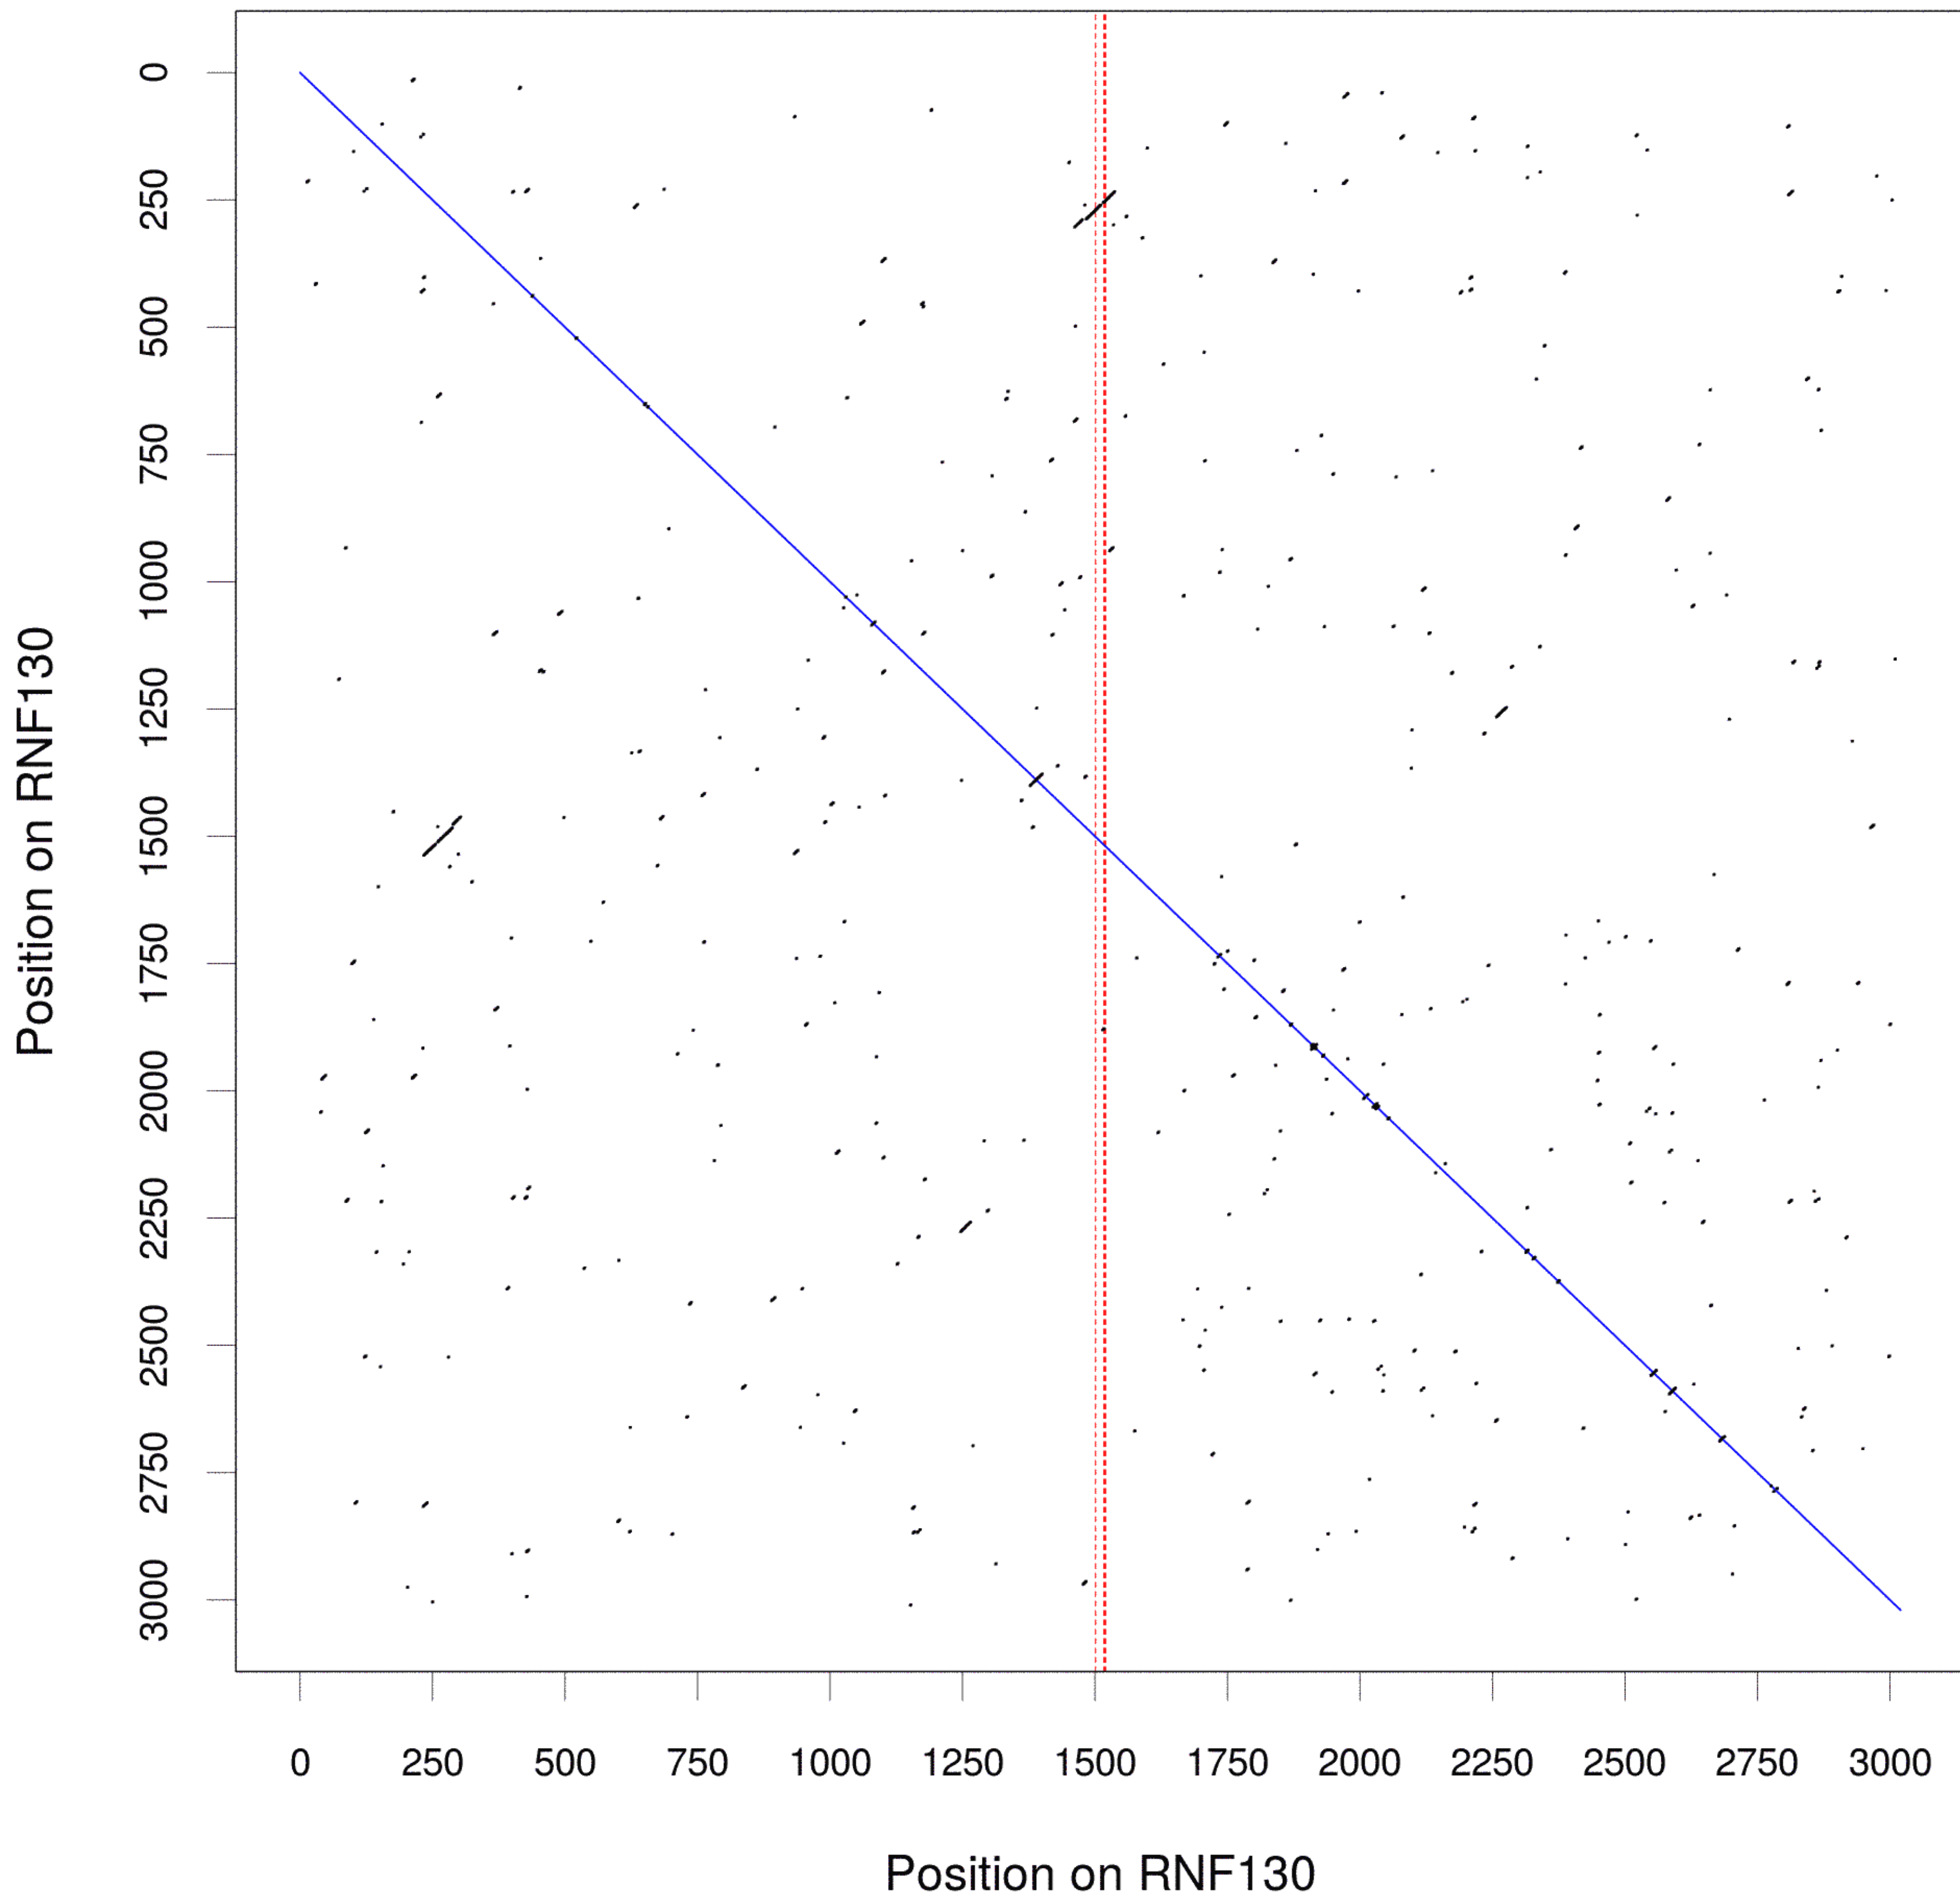



# RNF149

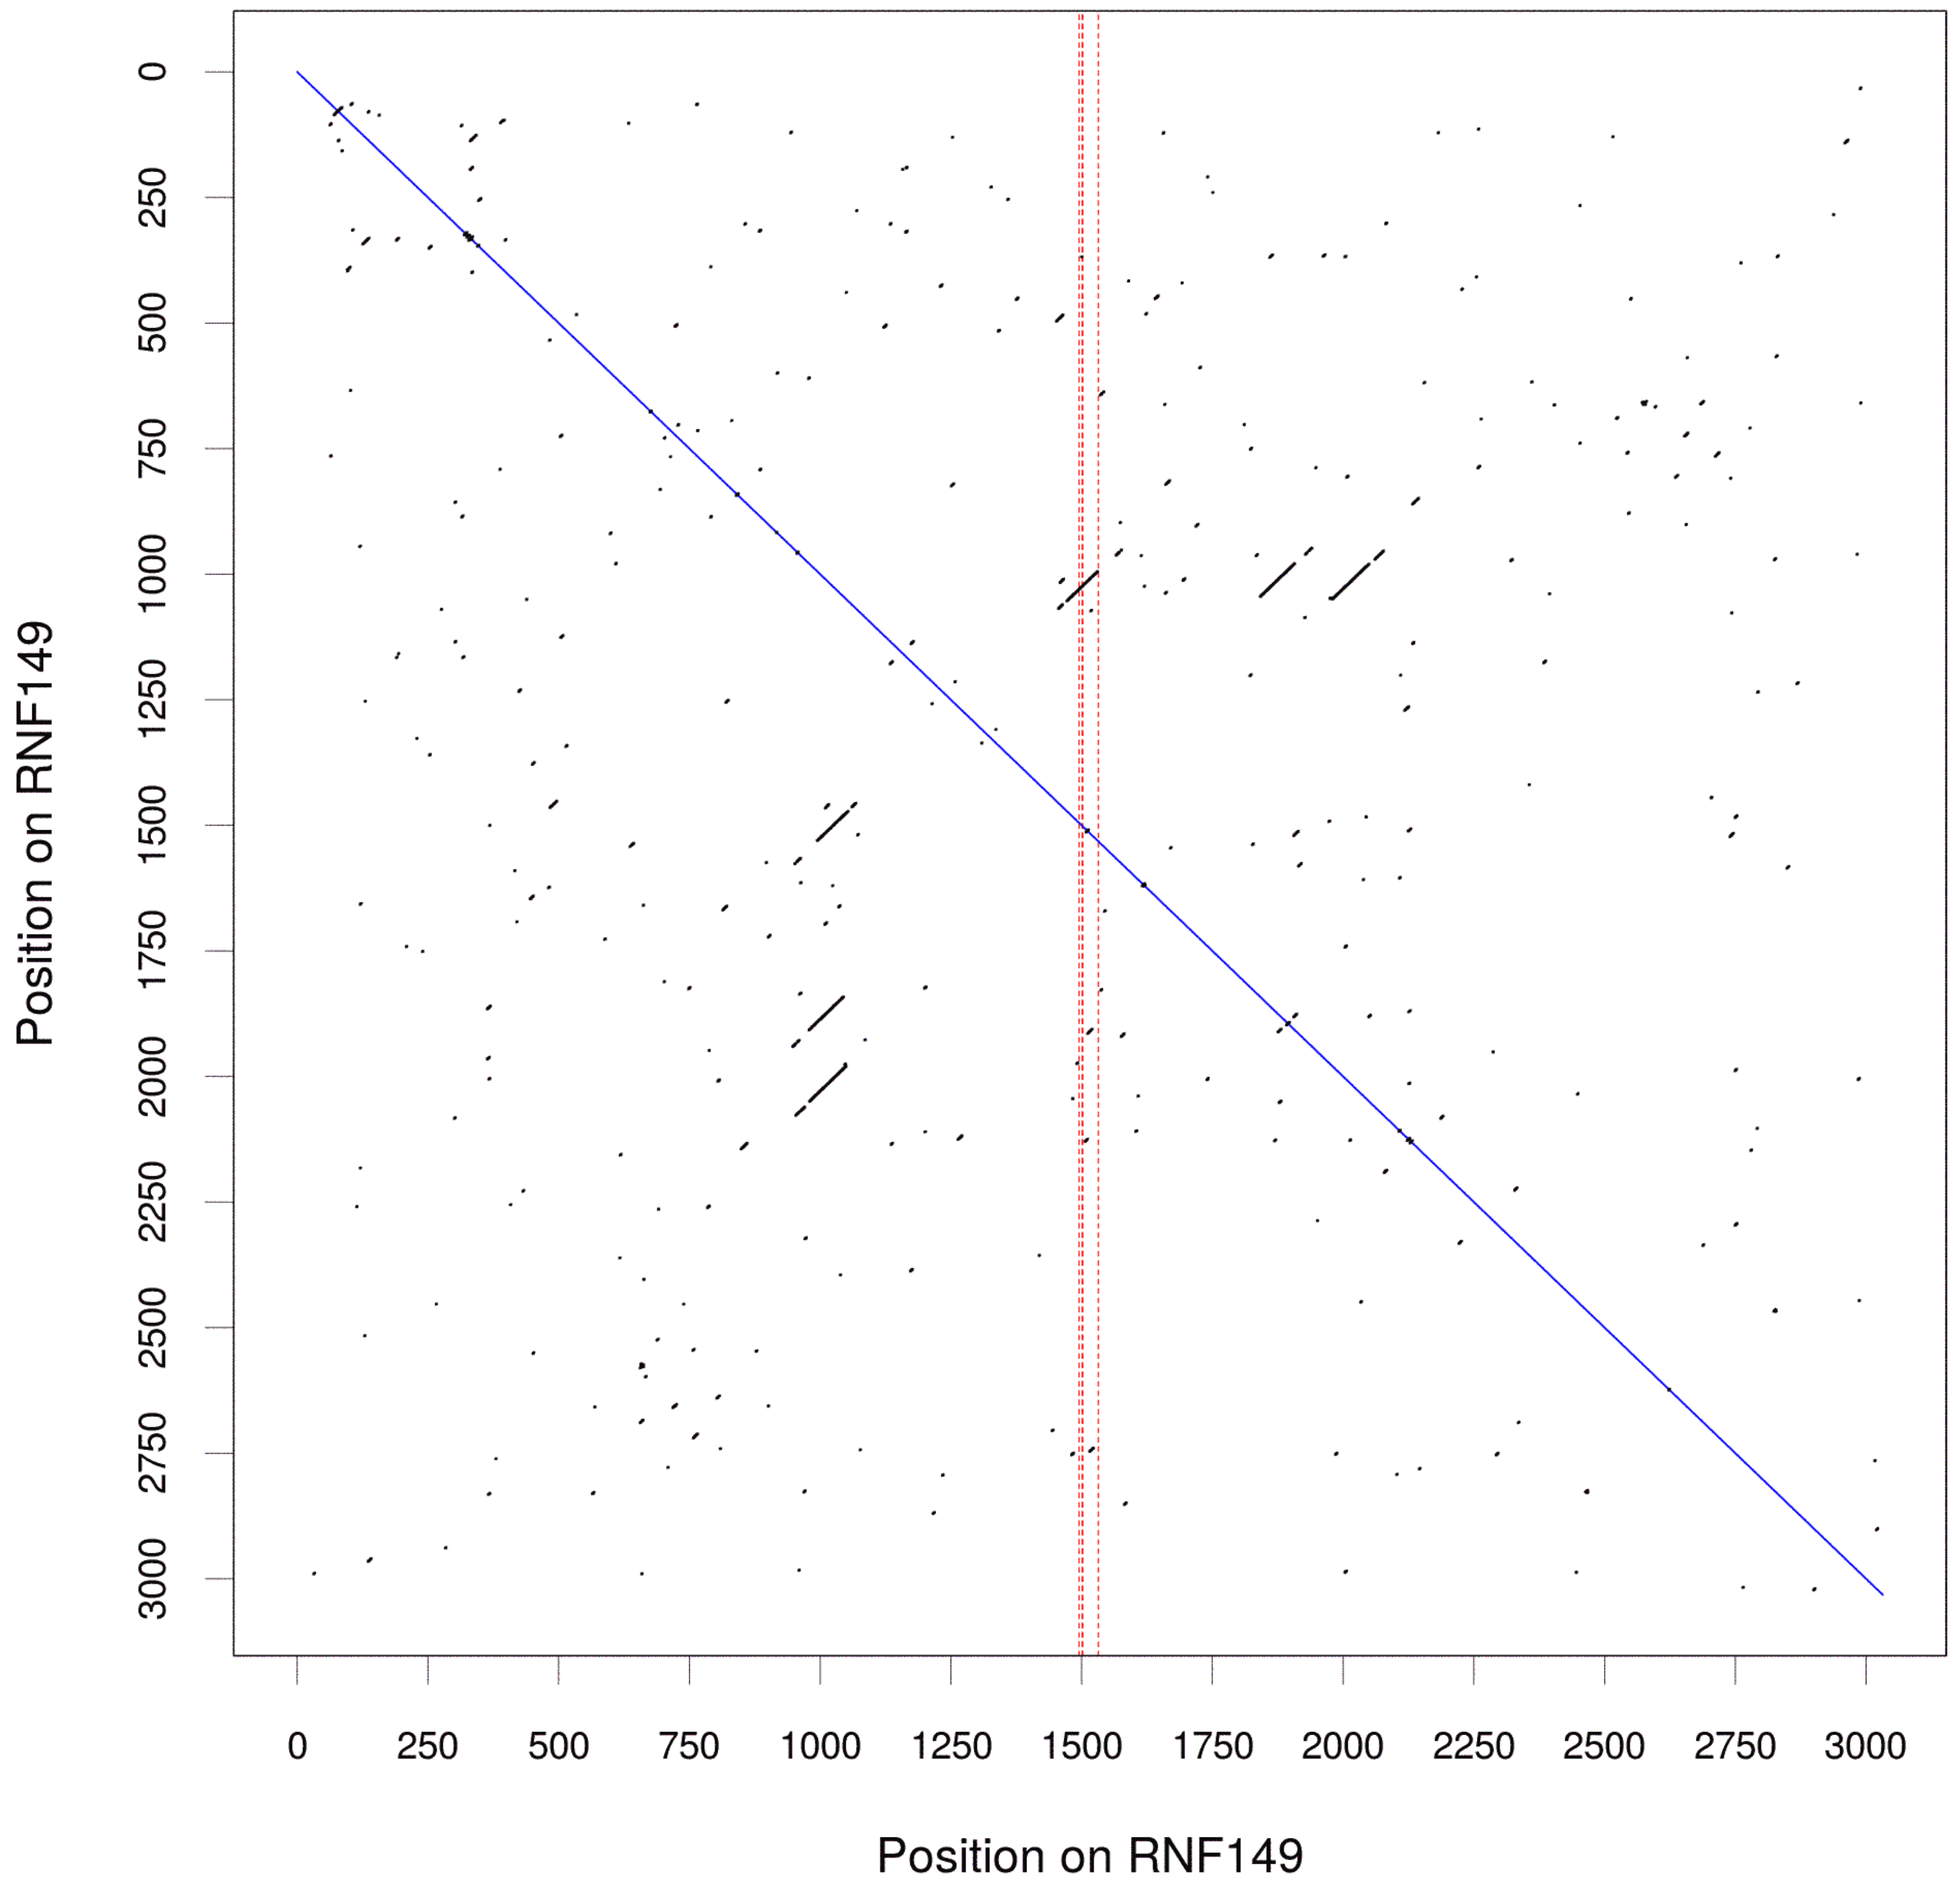

# RNF219

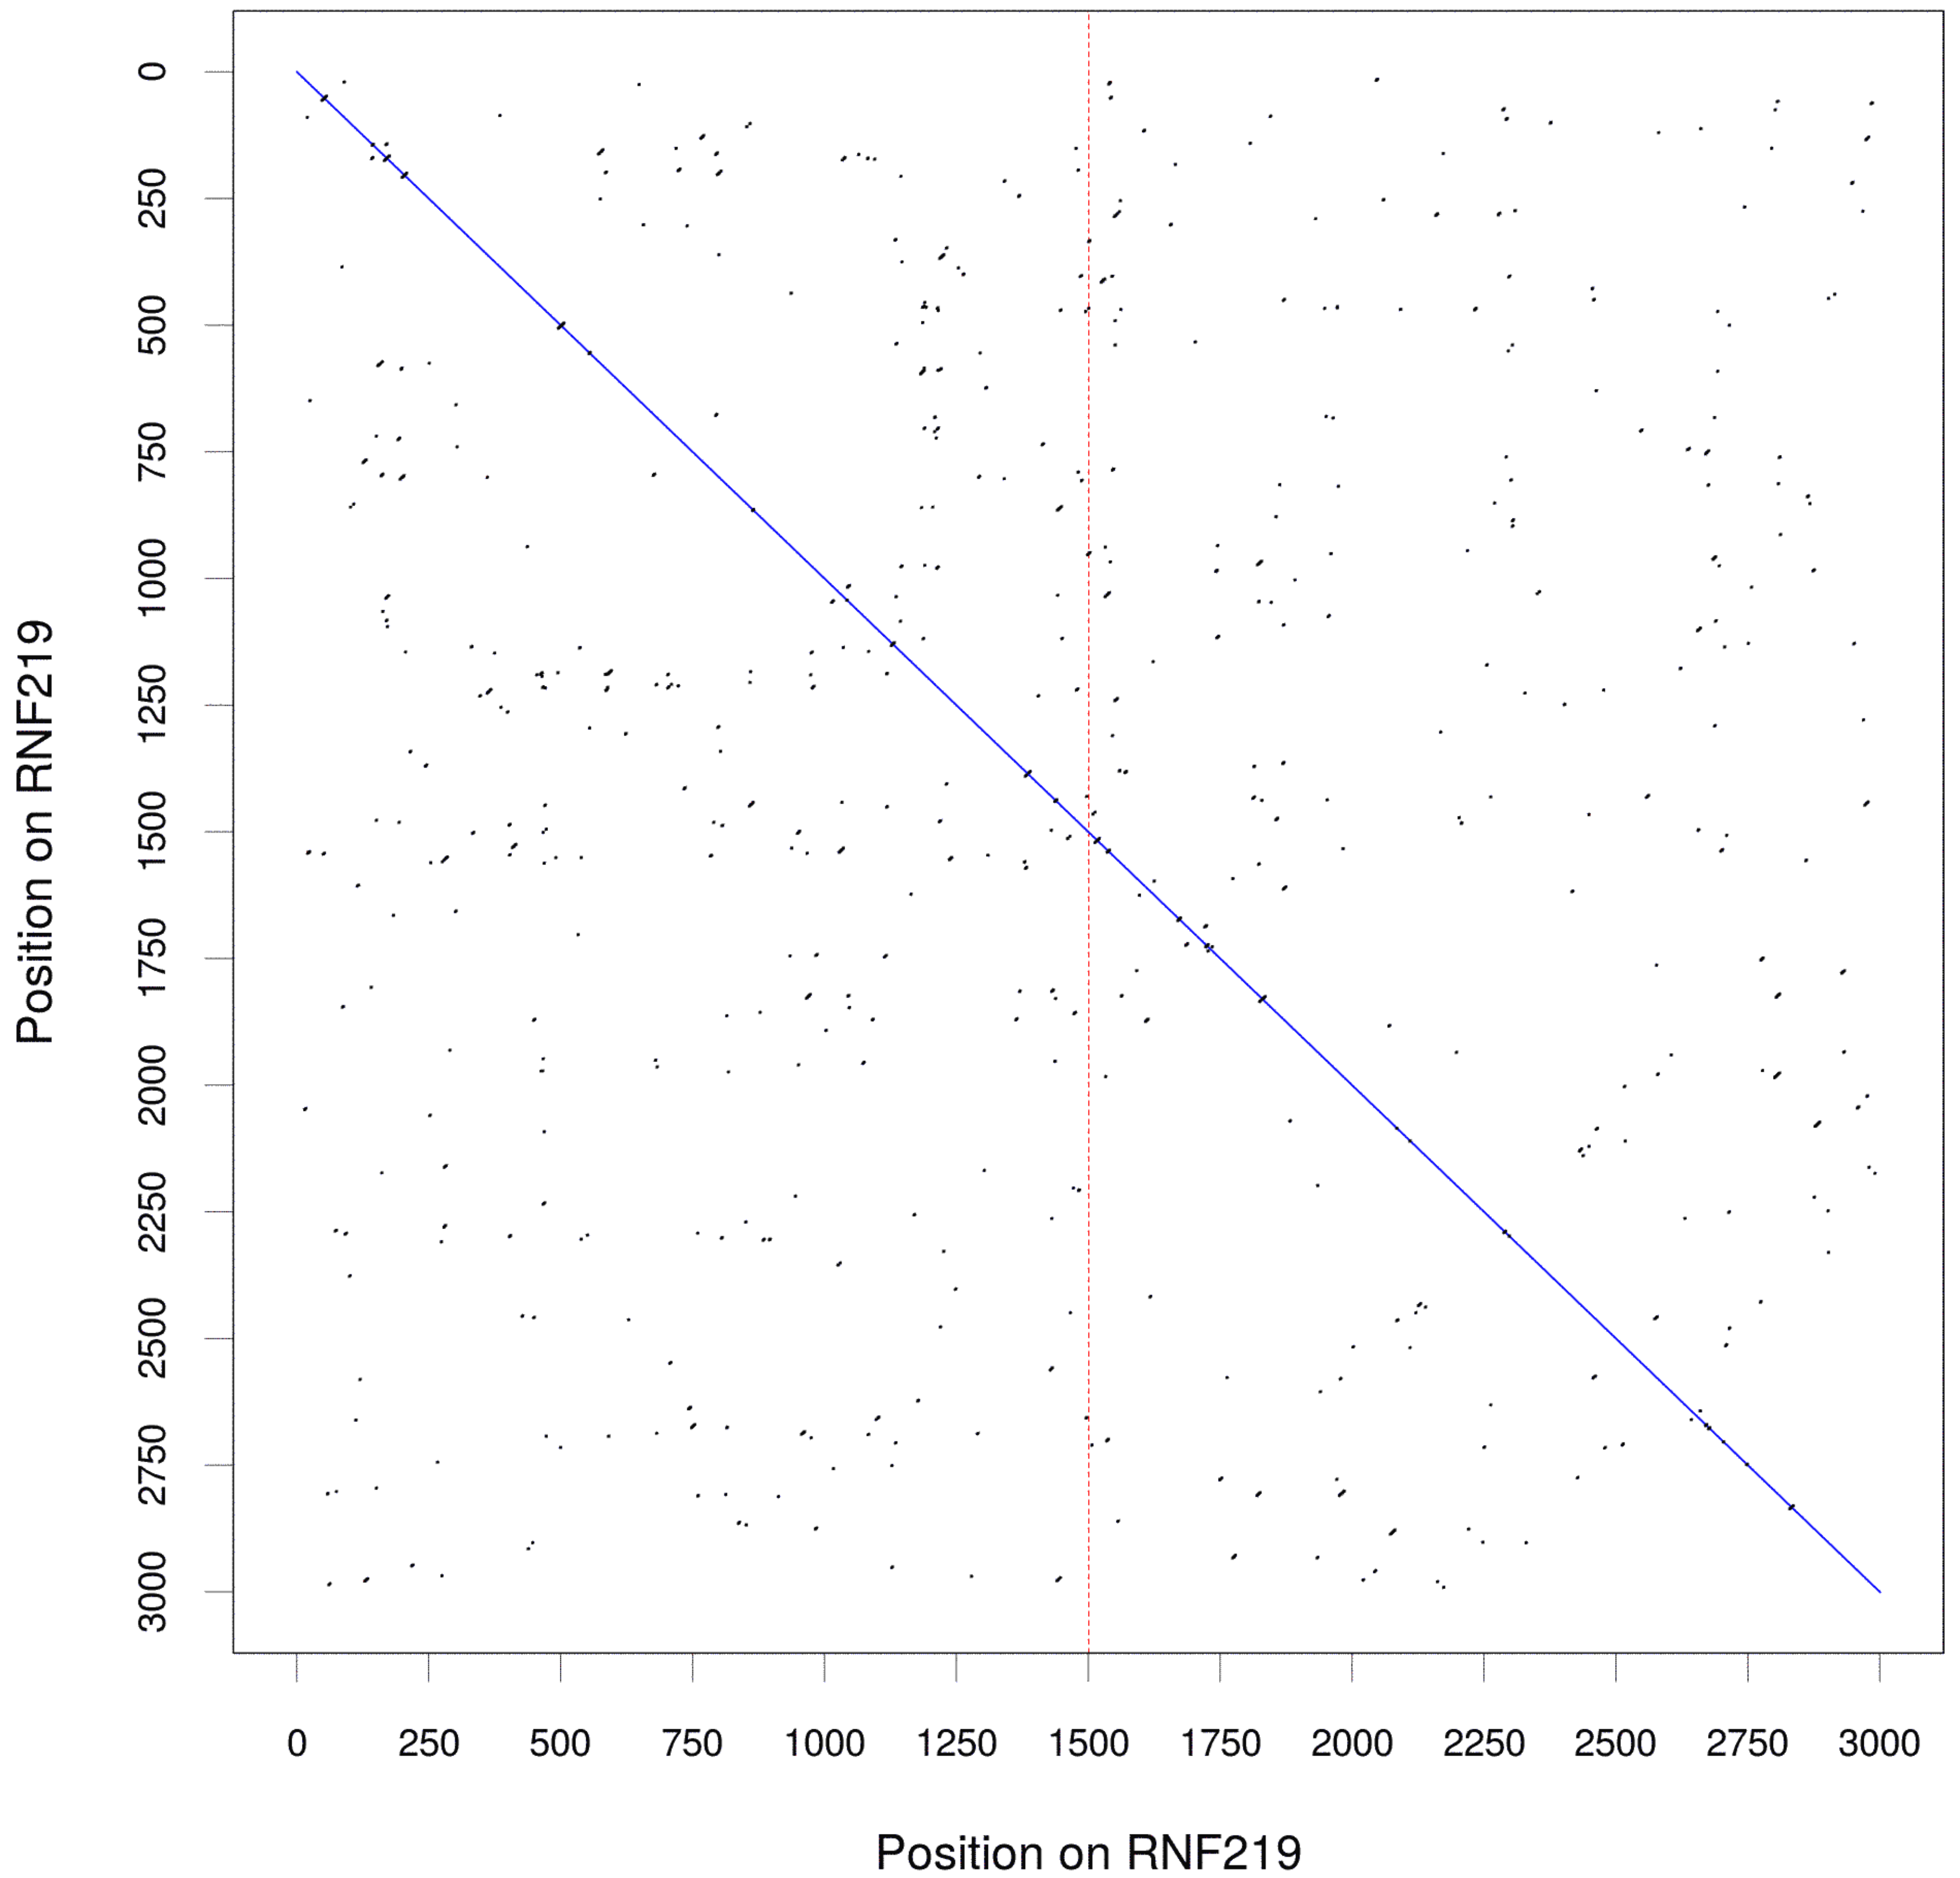

# RPAP2

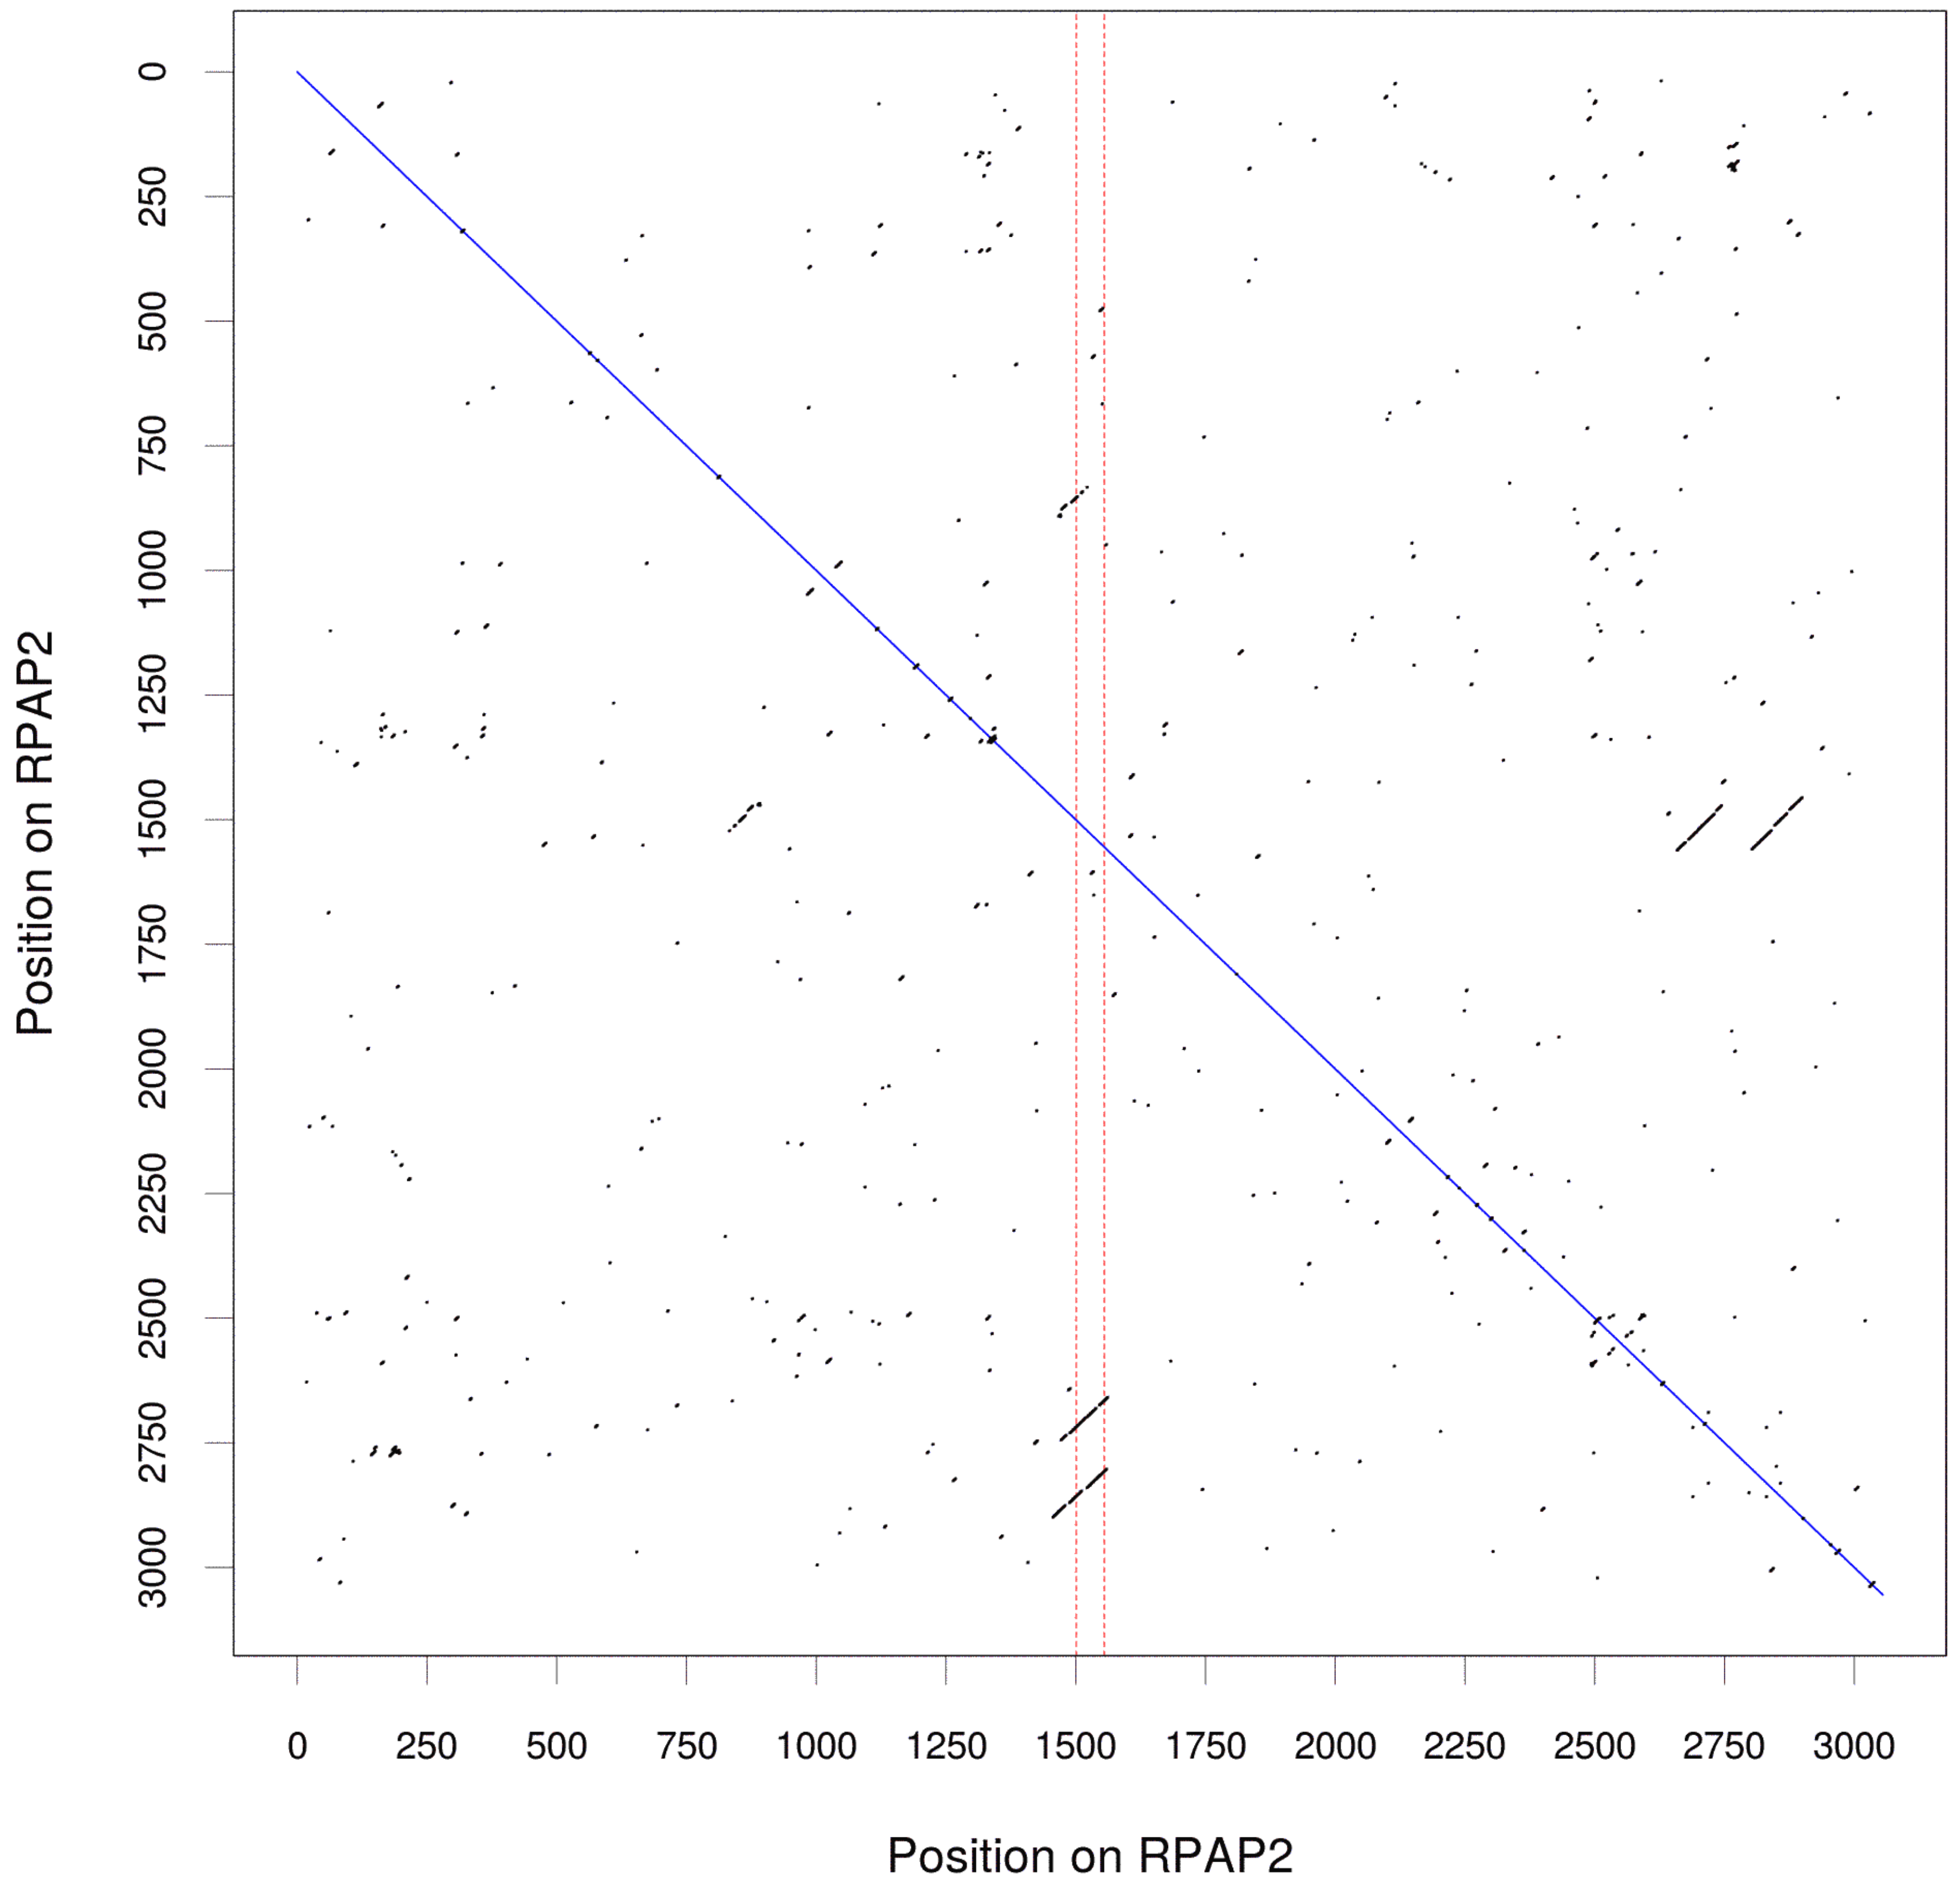

# RPS6KA4

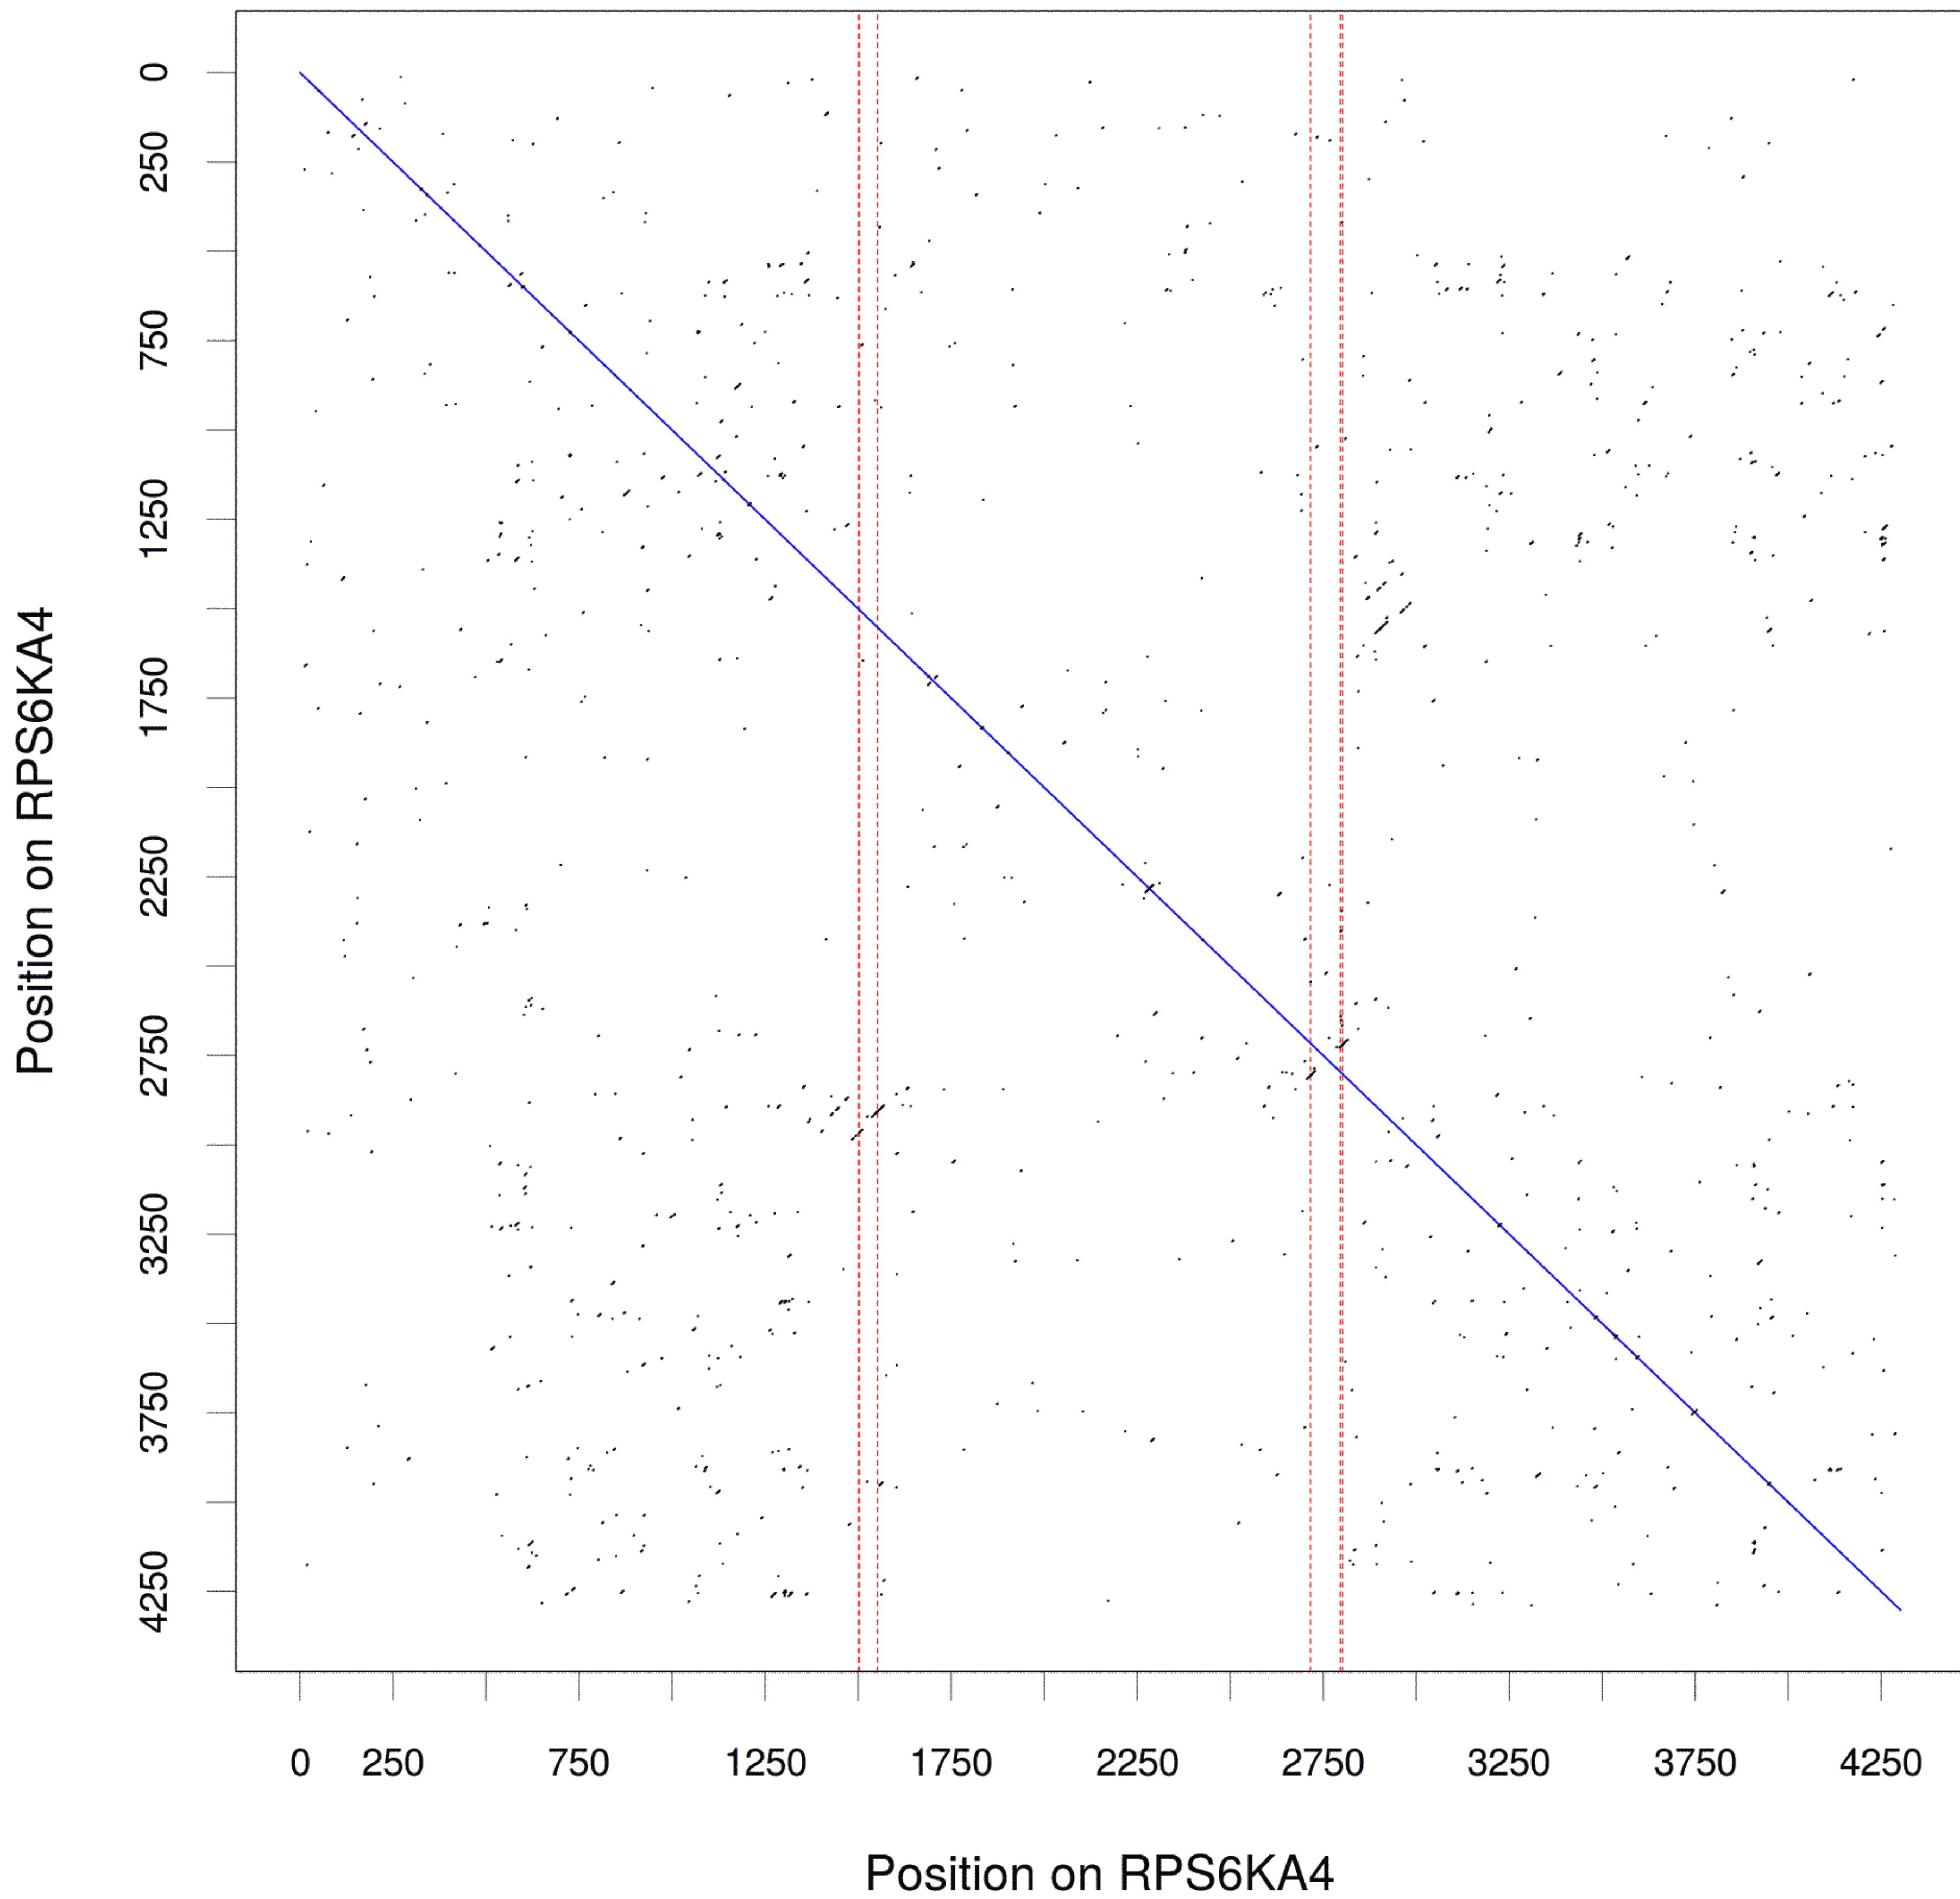

# RPS9

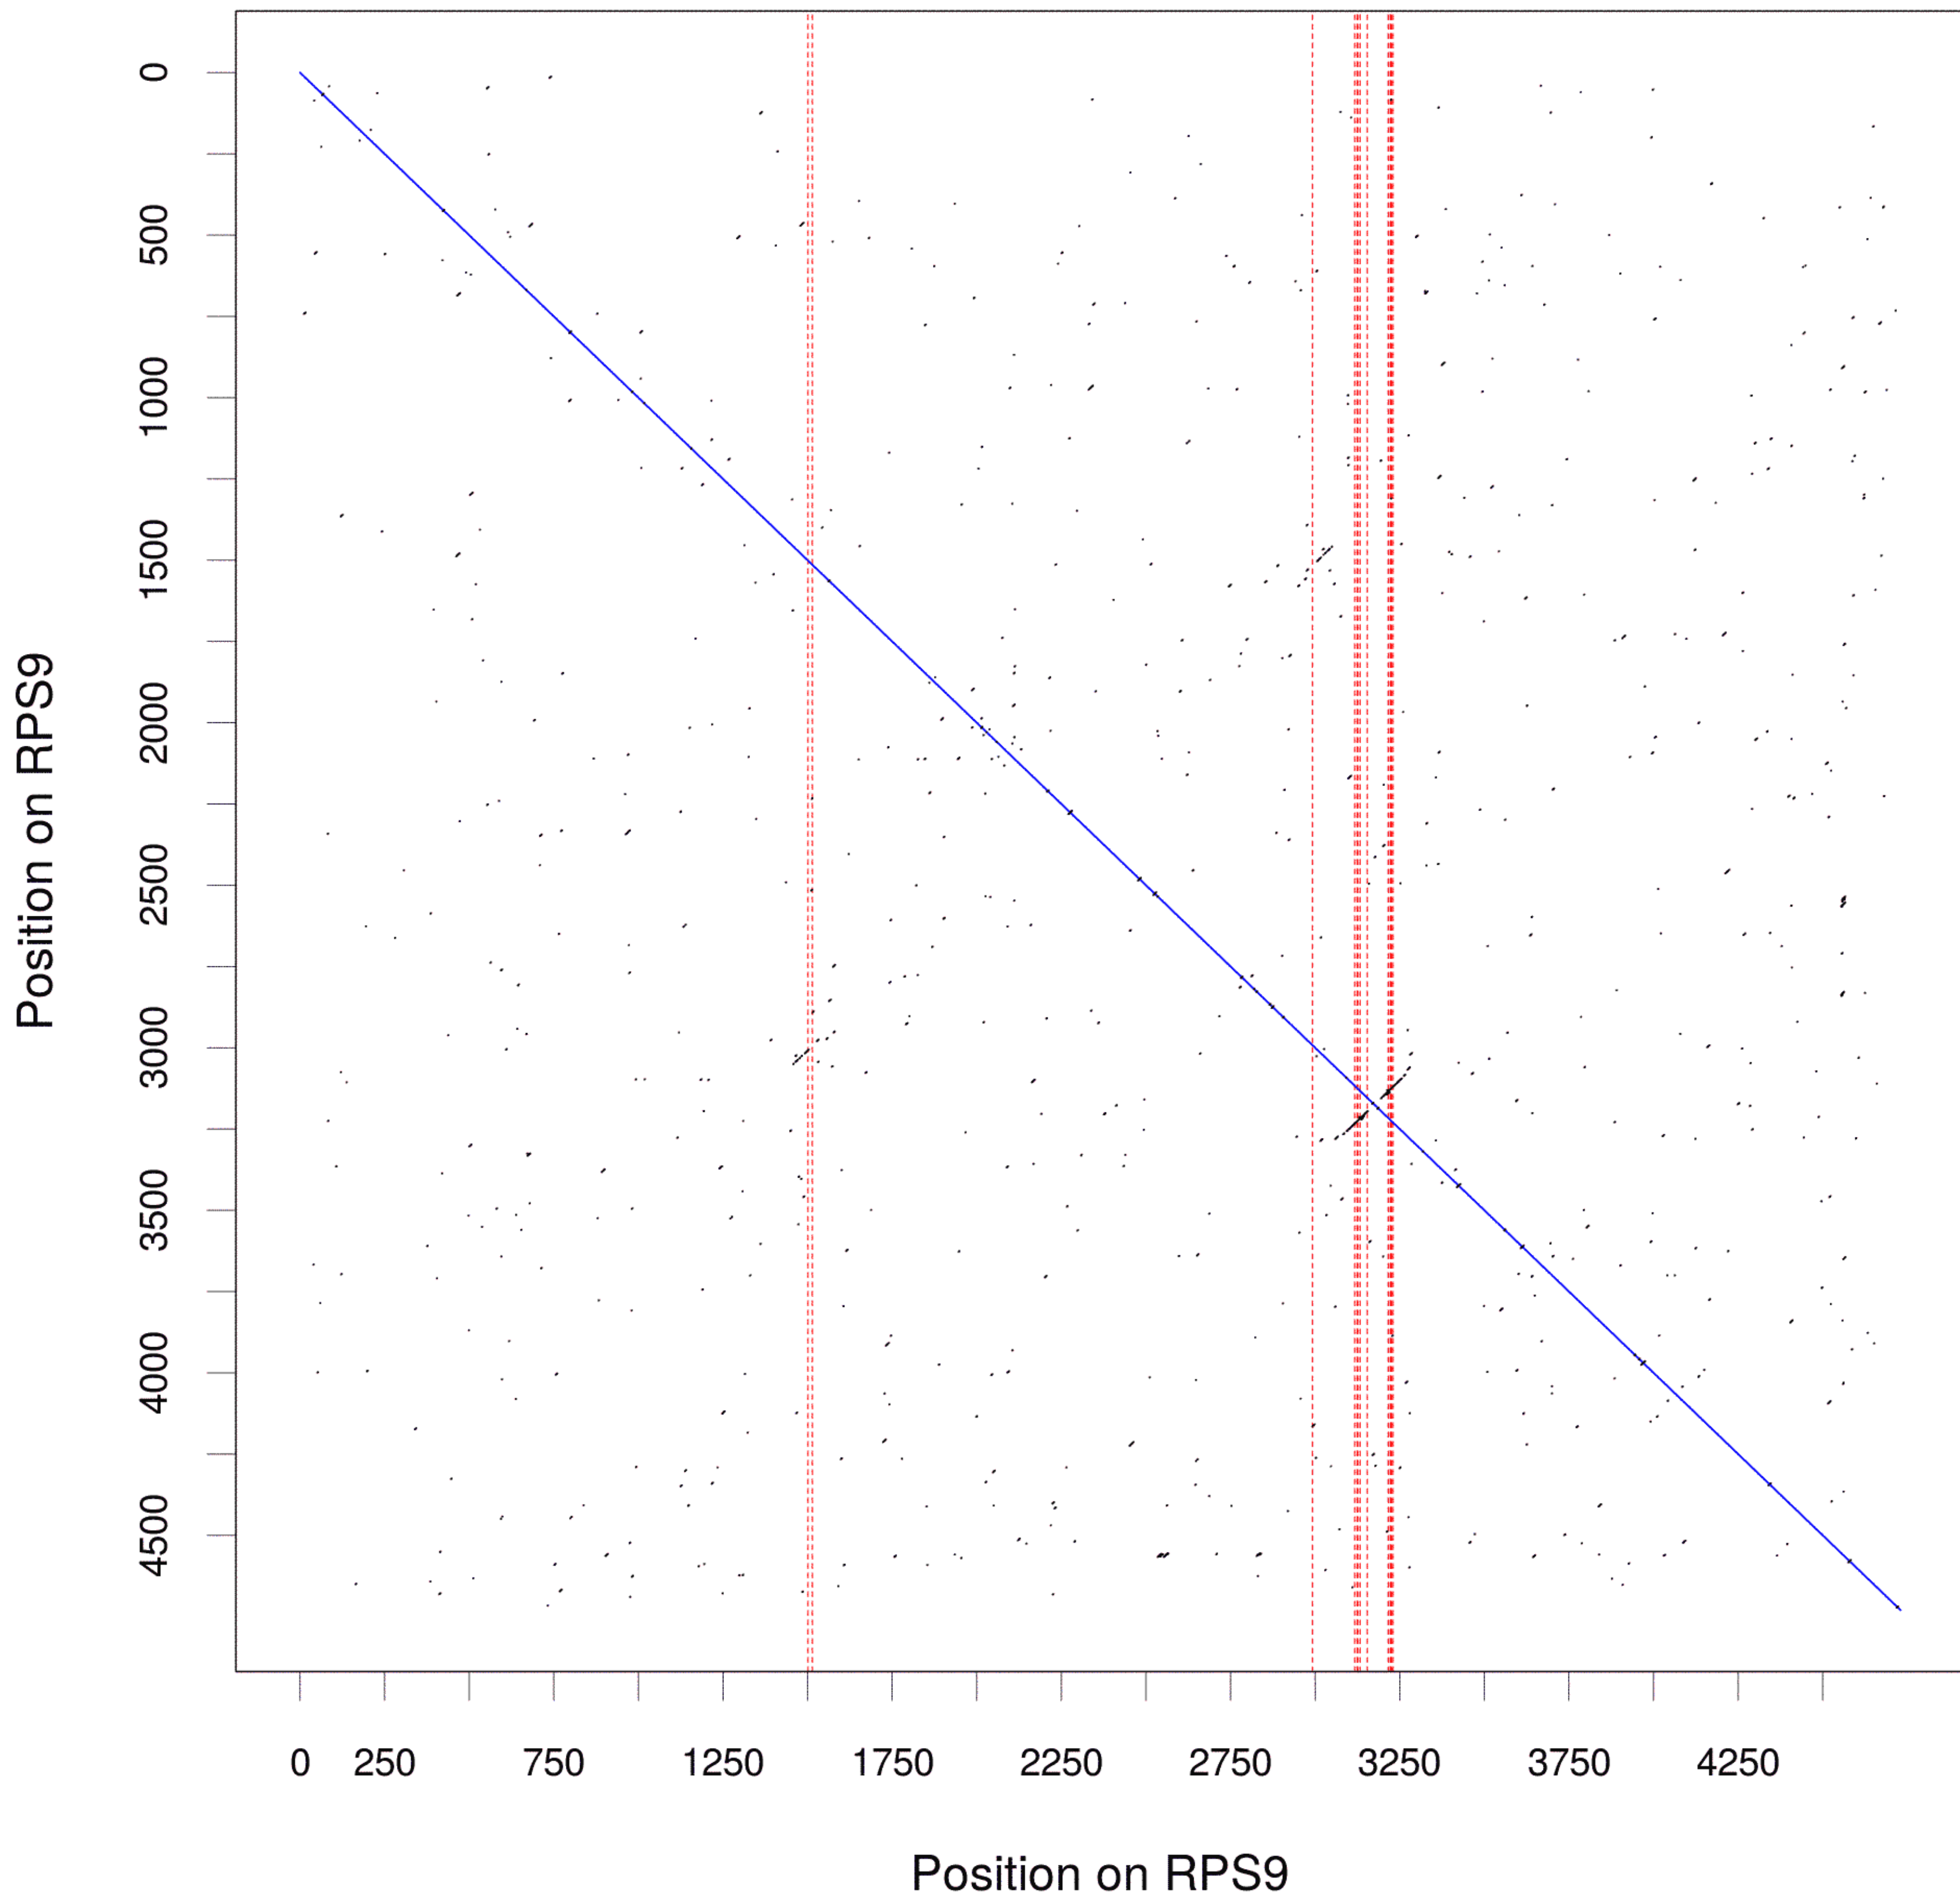

# RPUSD3

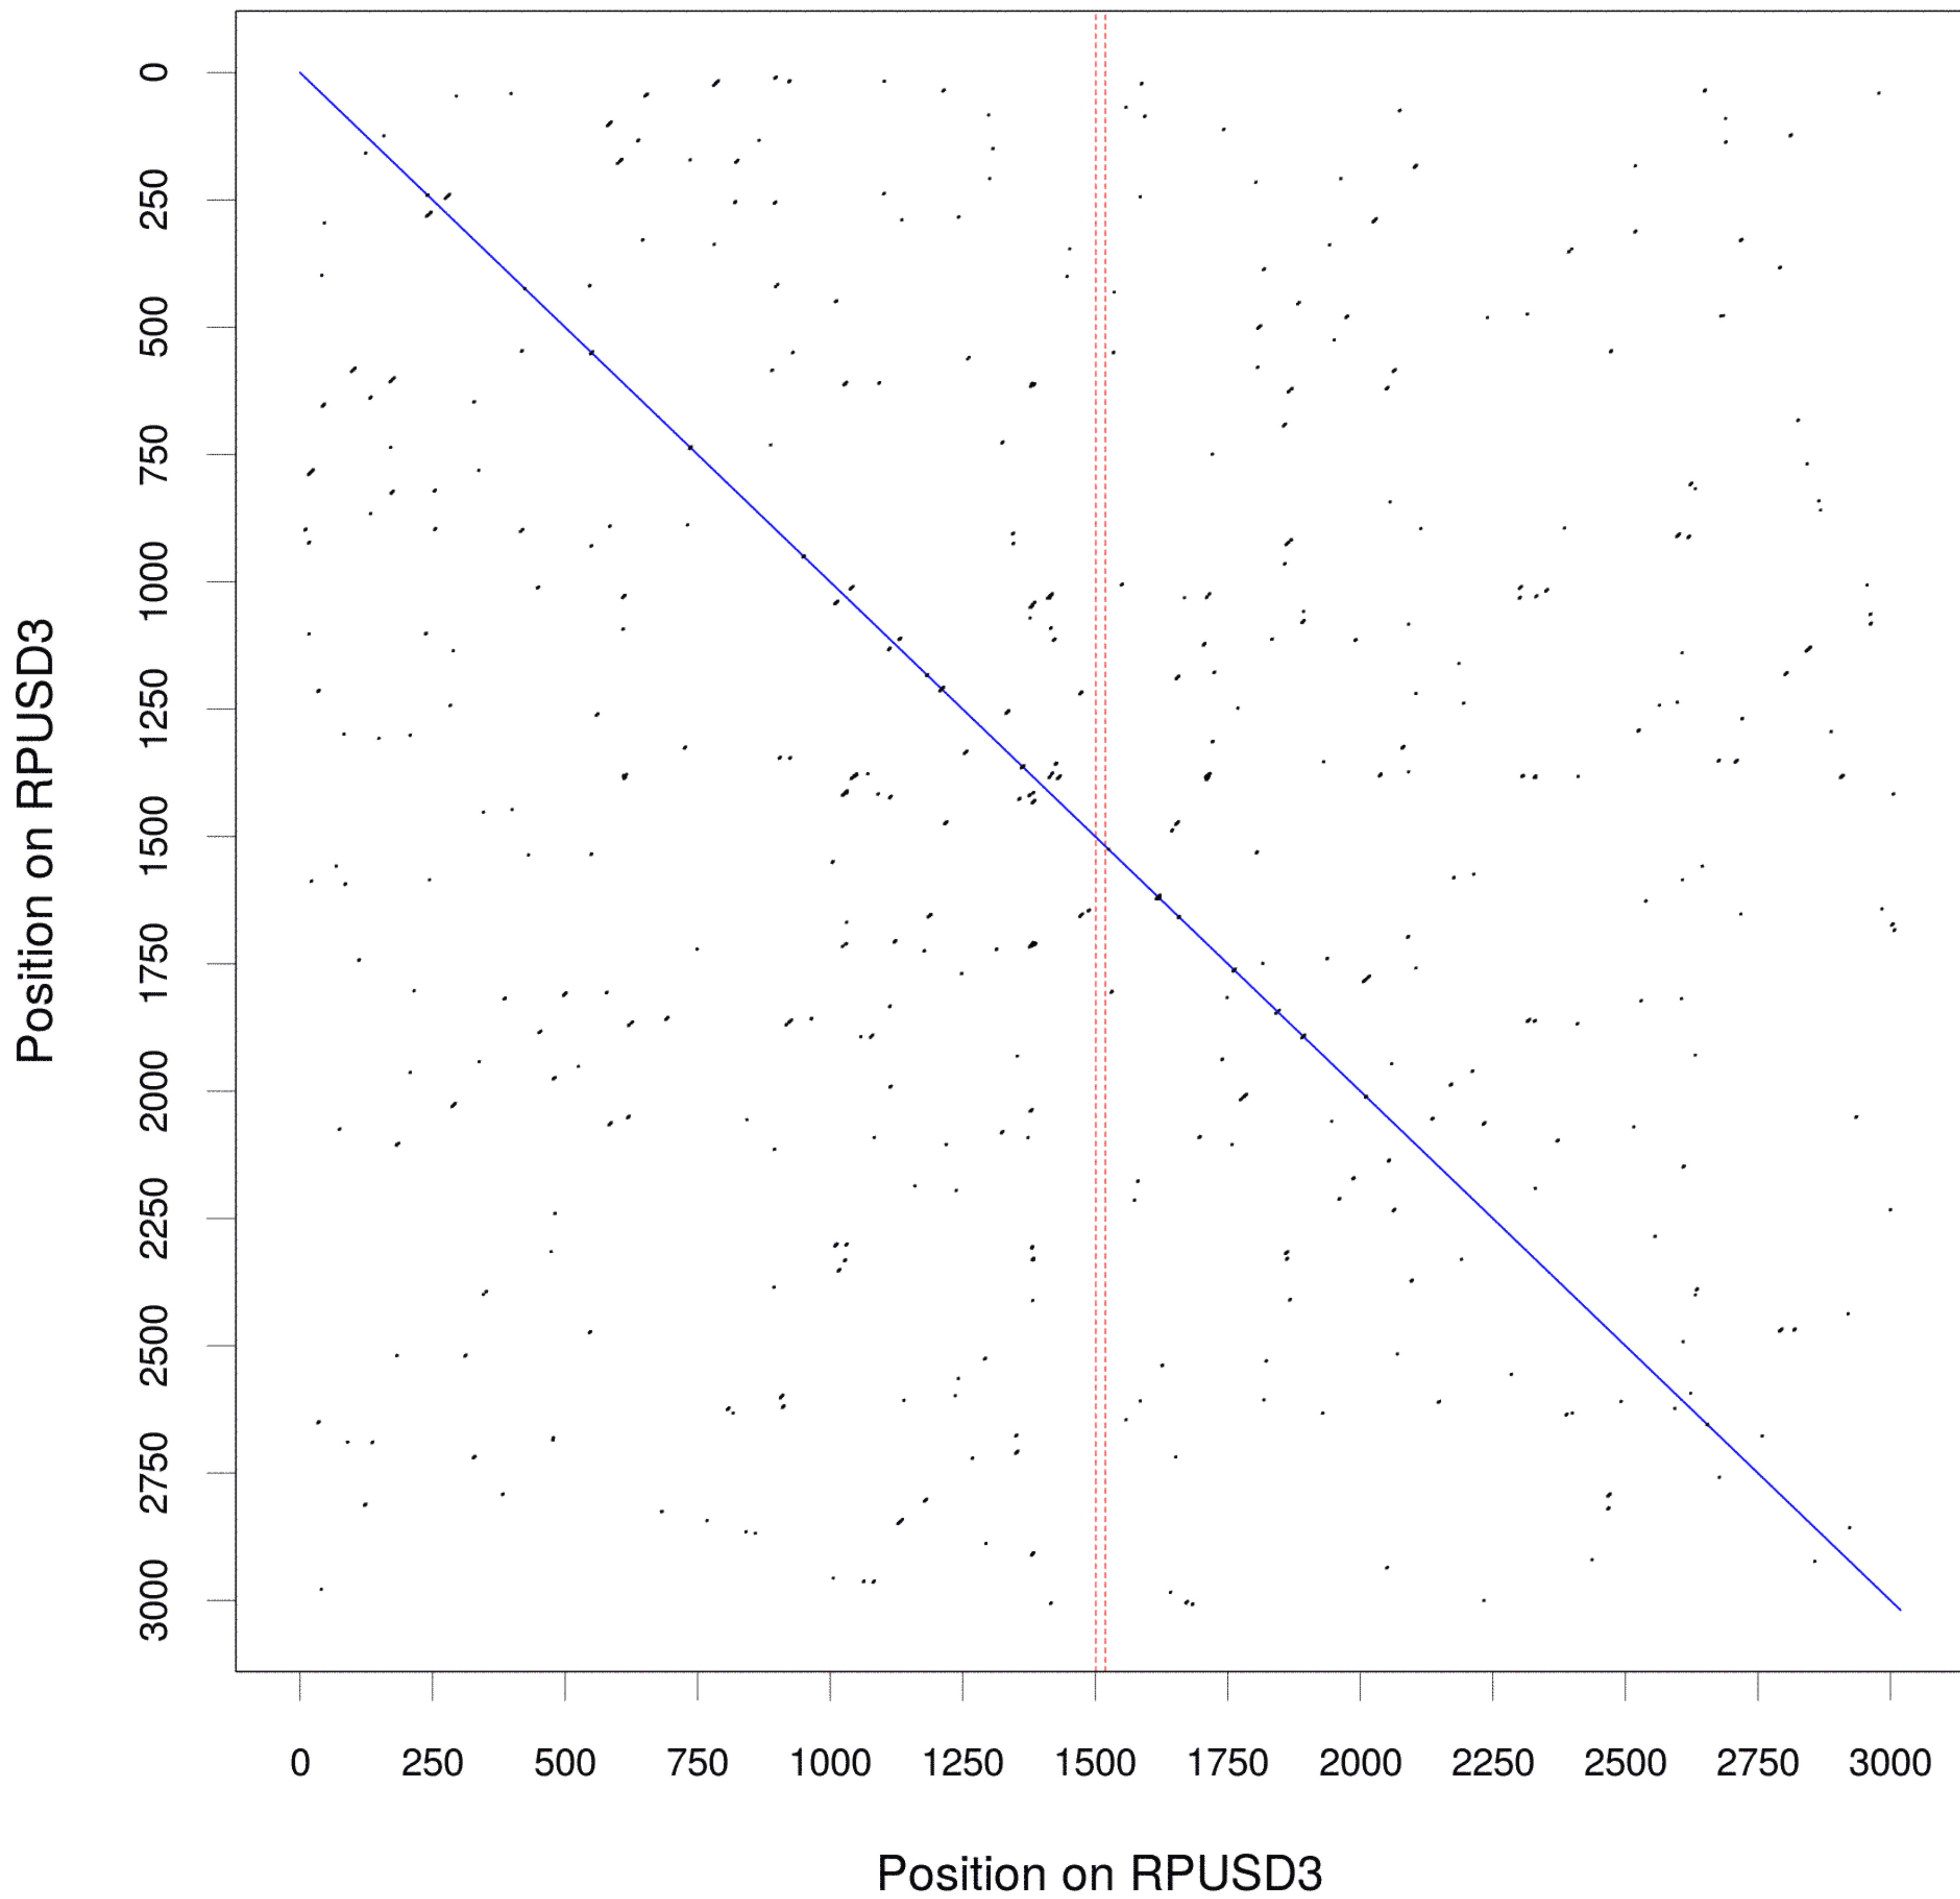

# RRN3

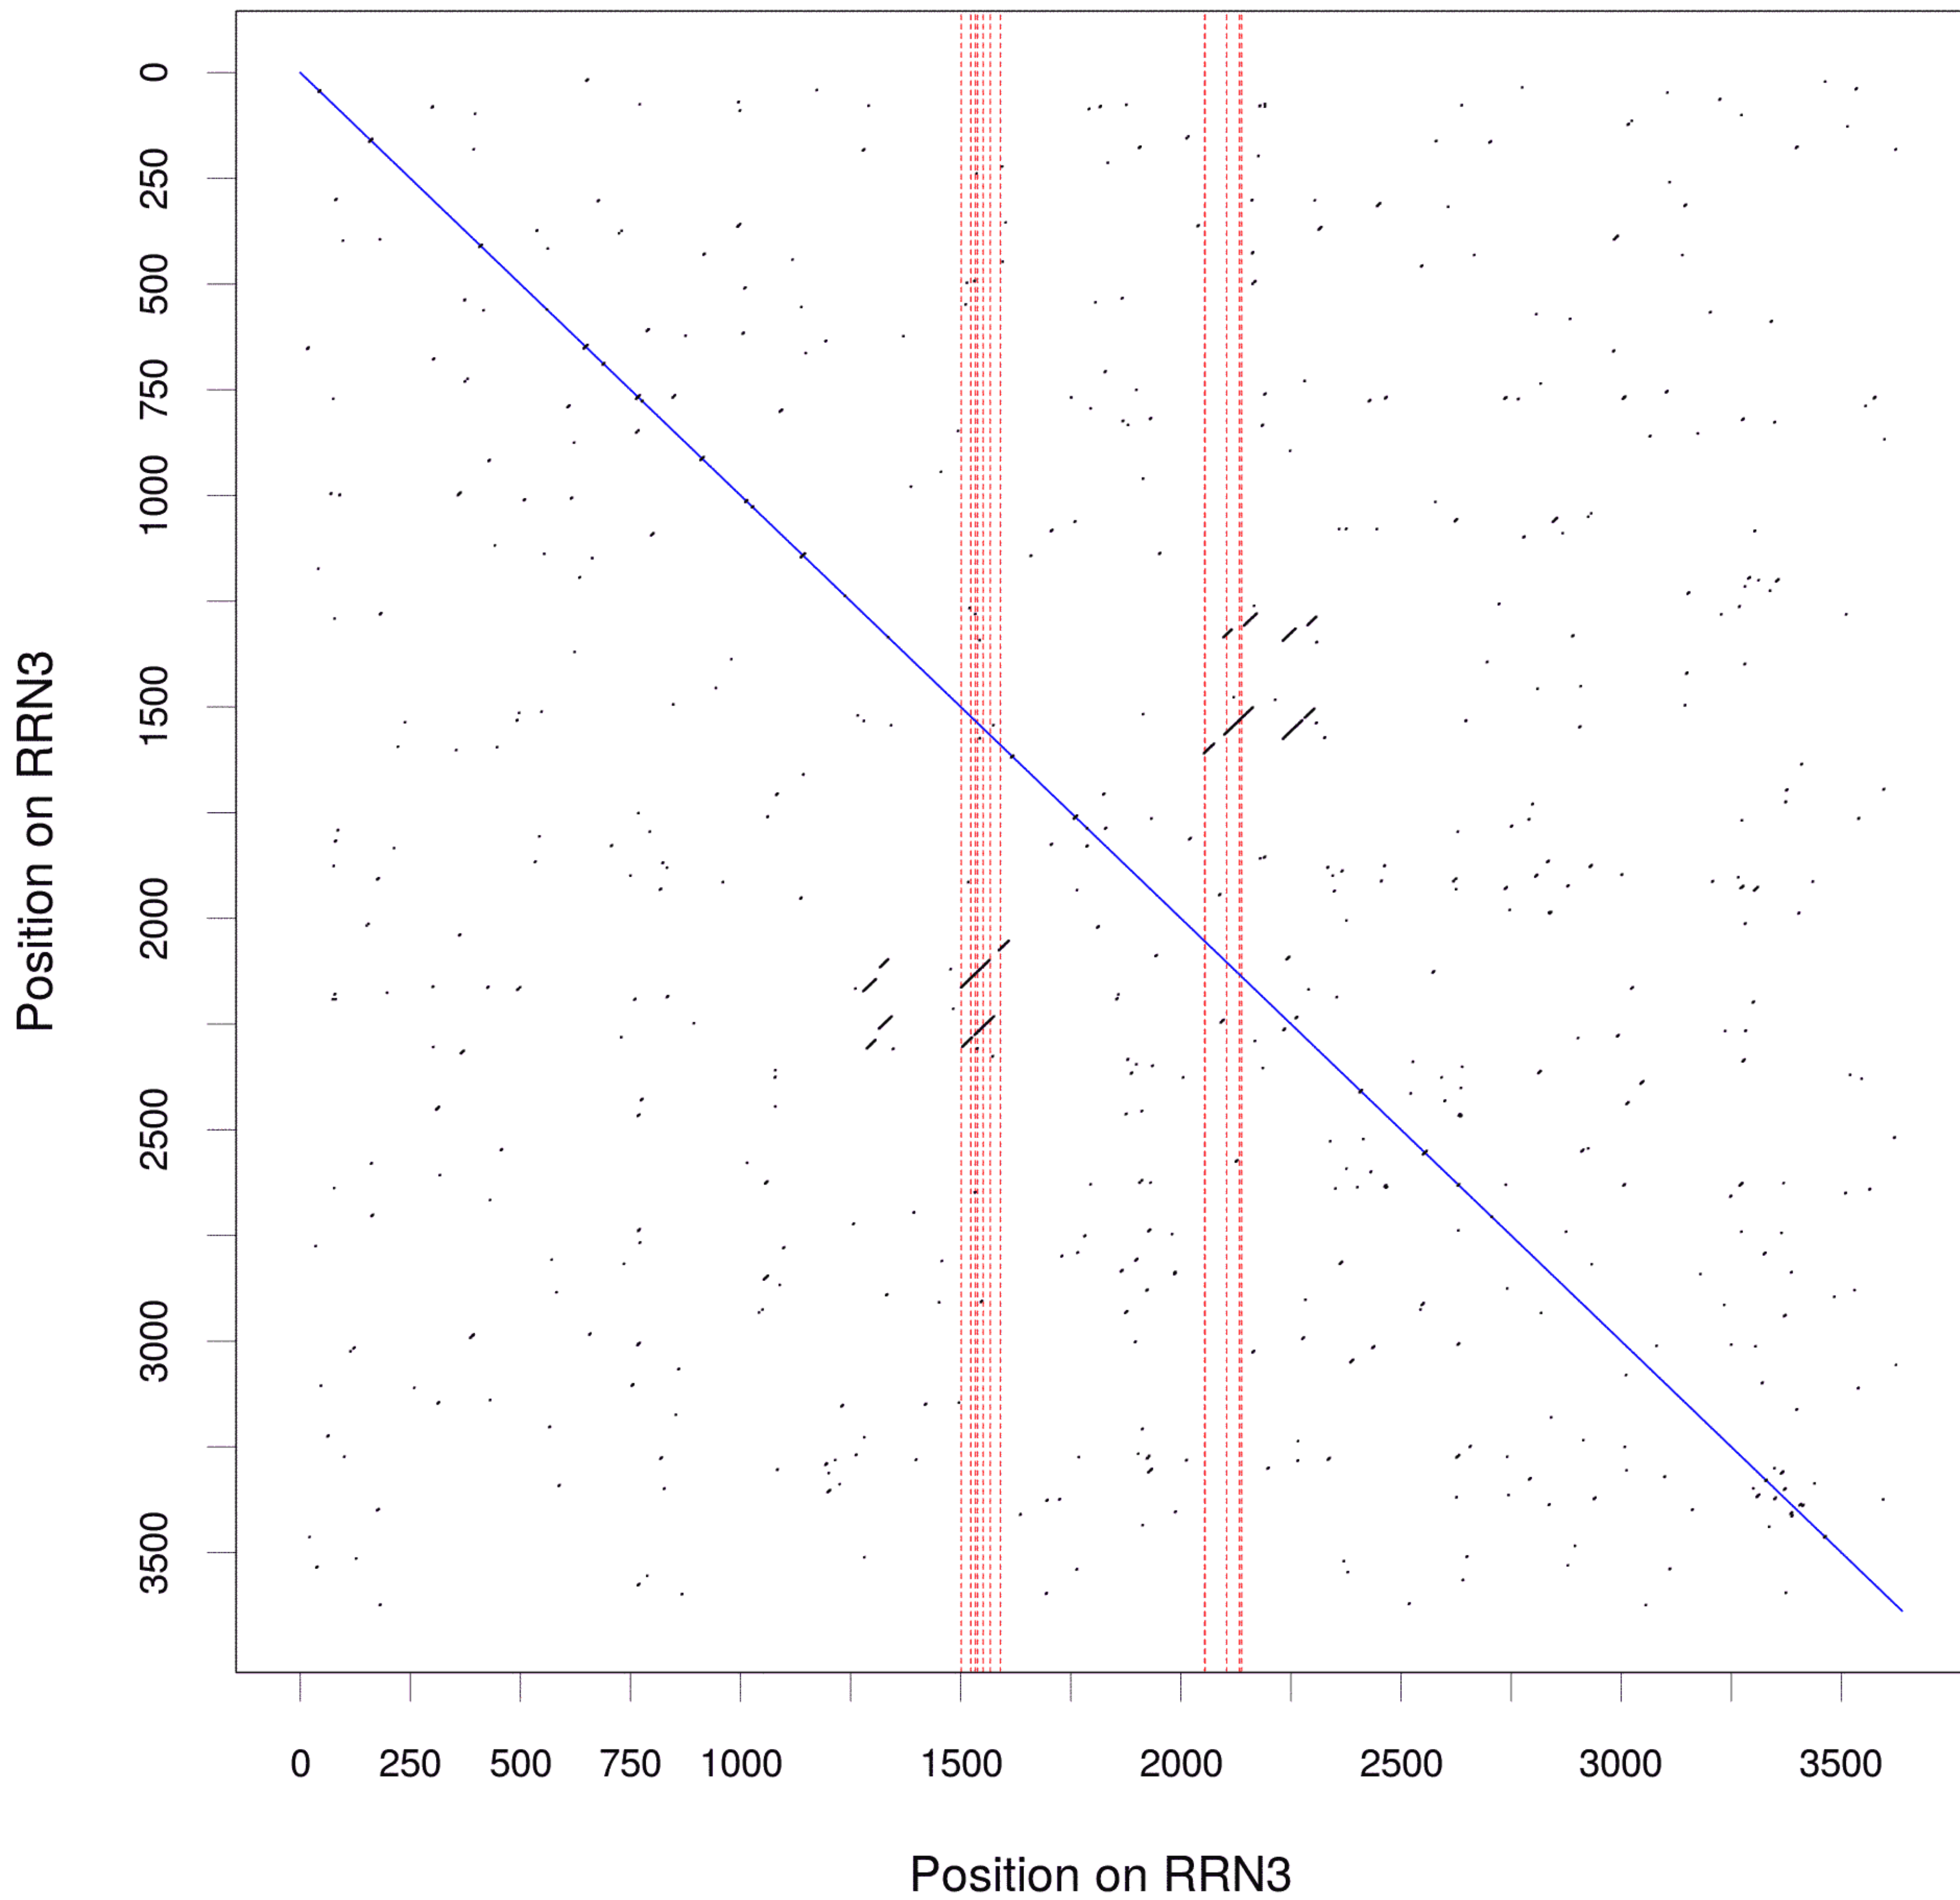

# RUFY3

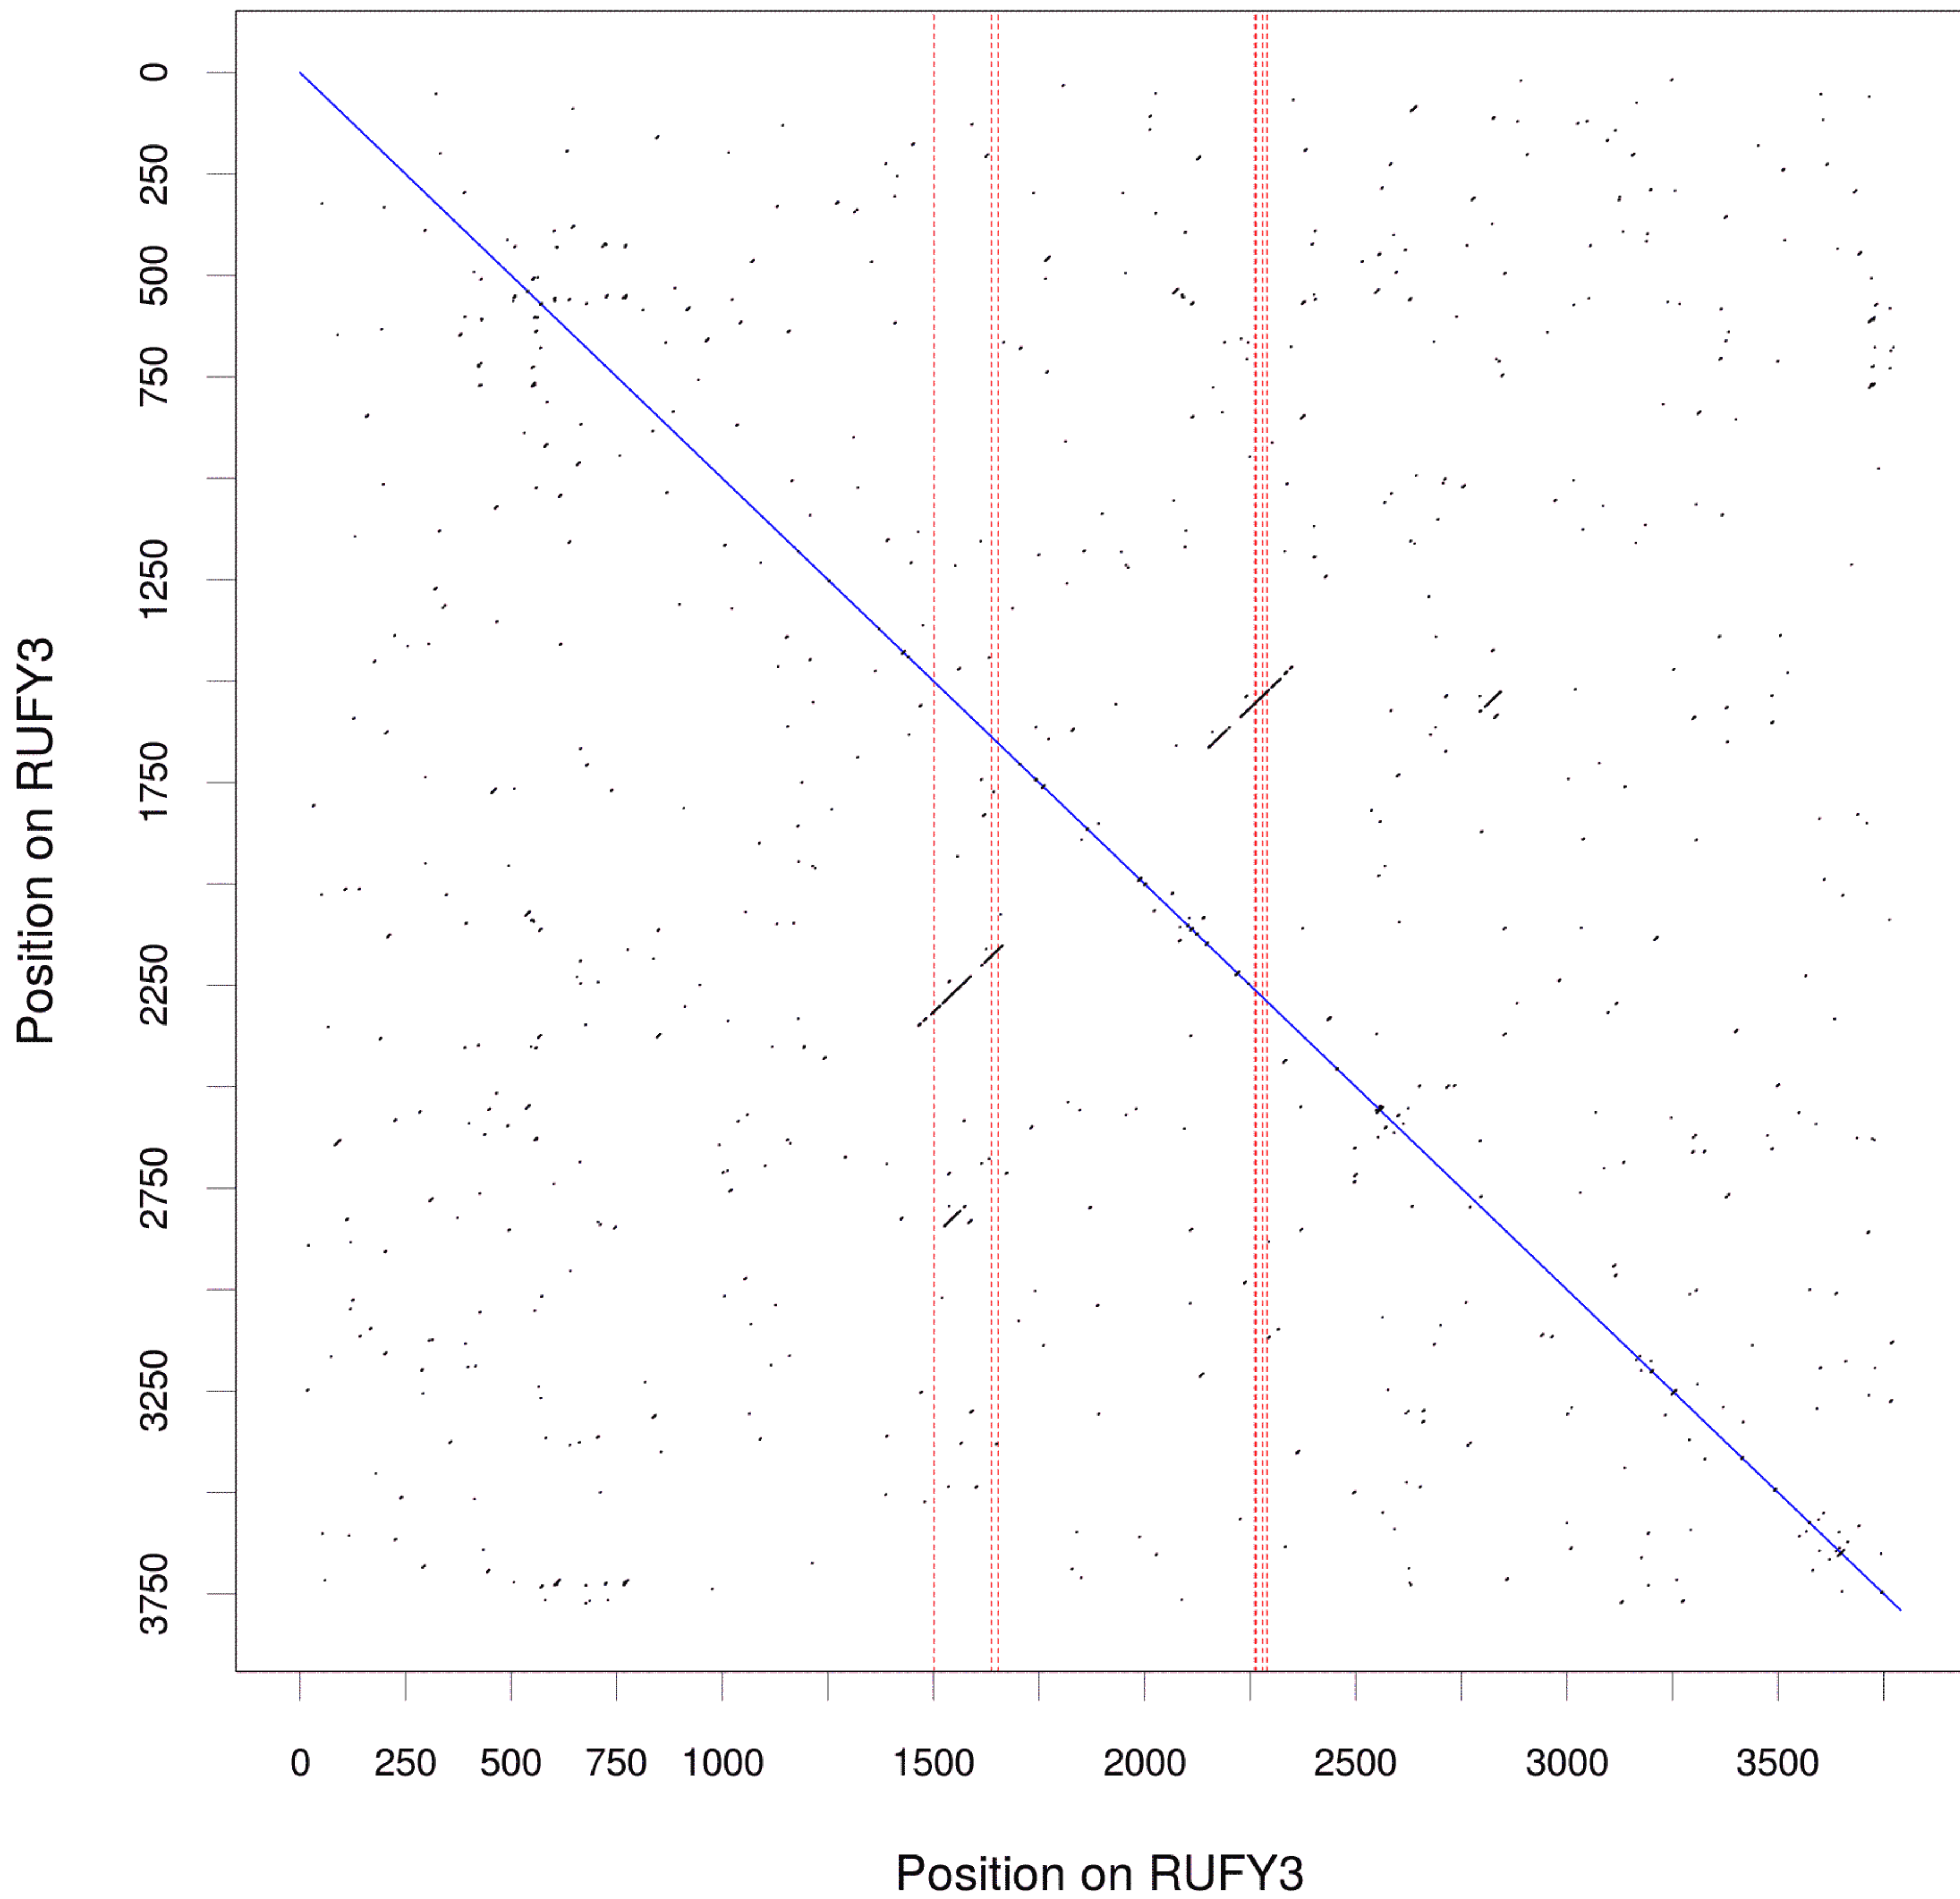



# SAMM50

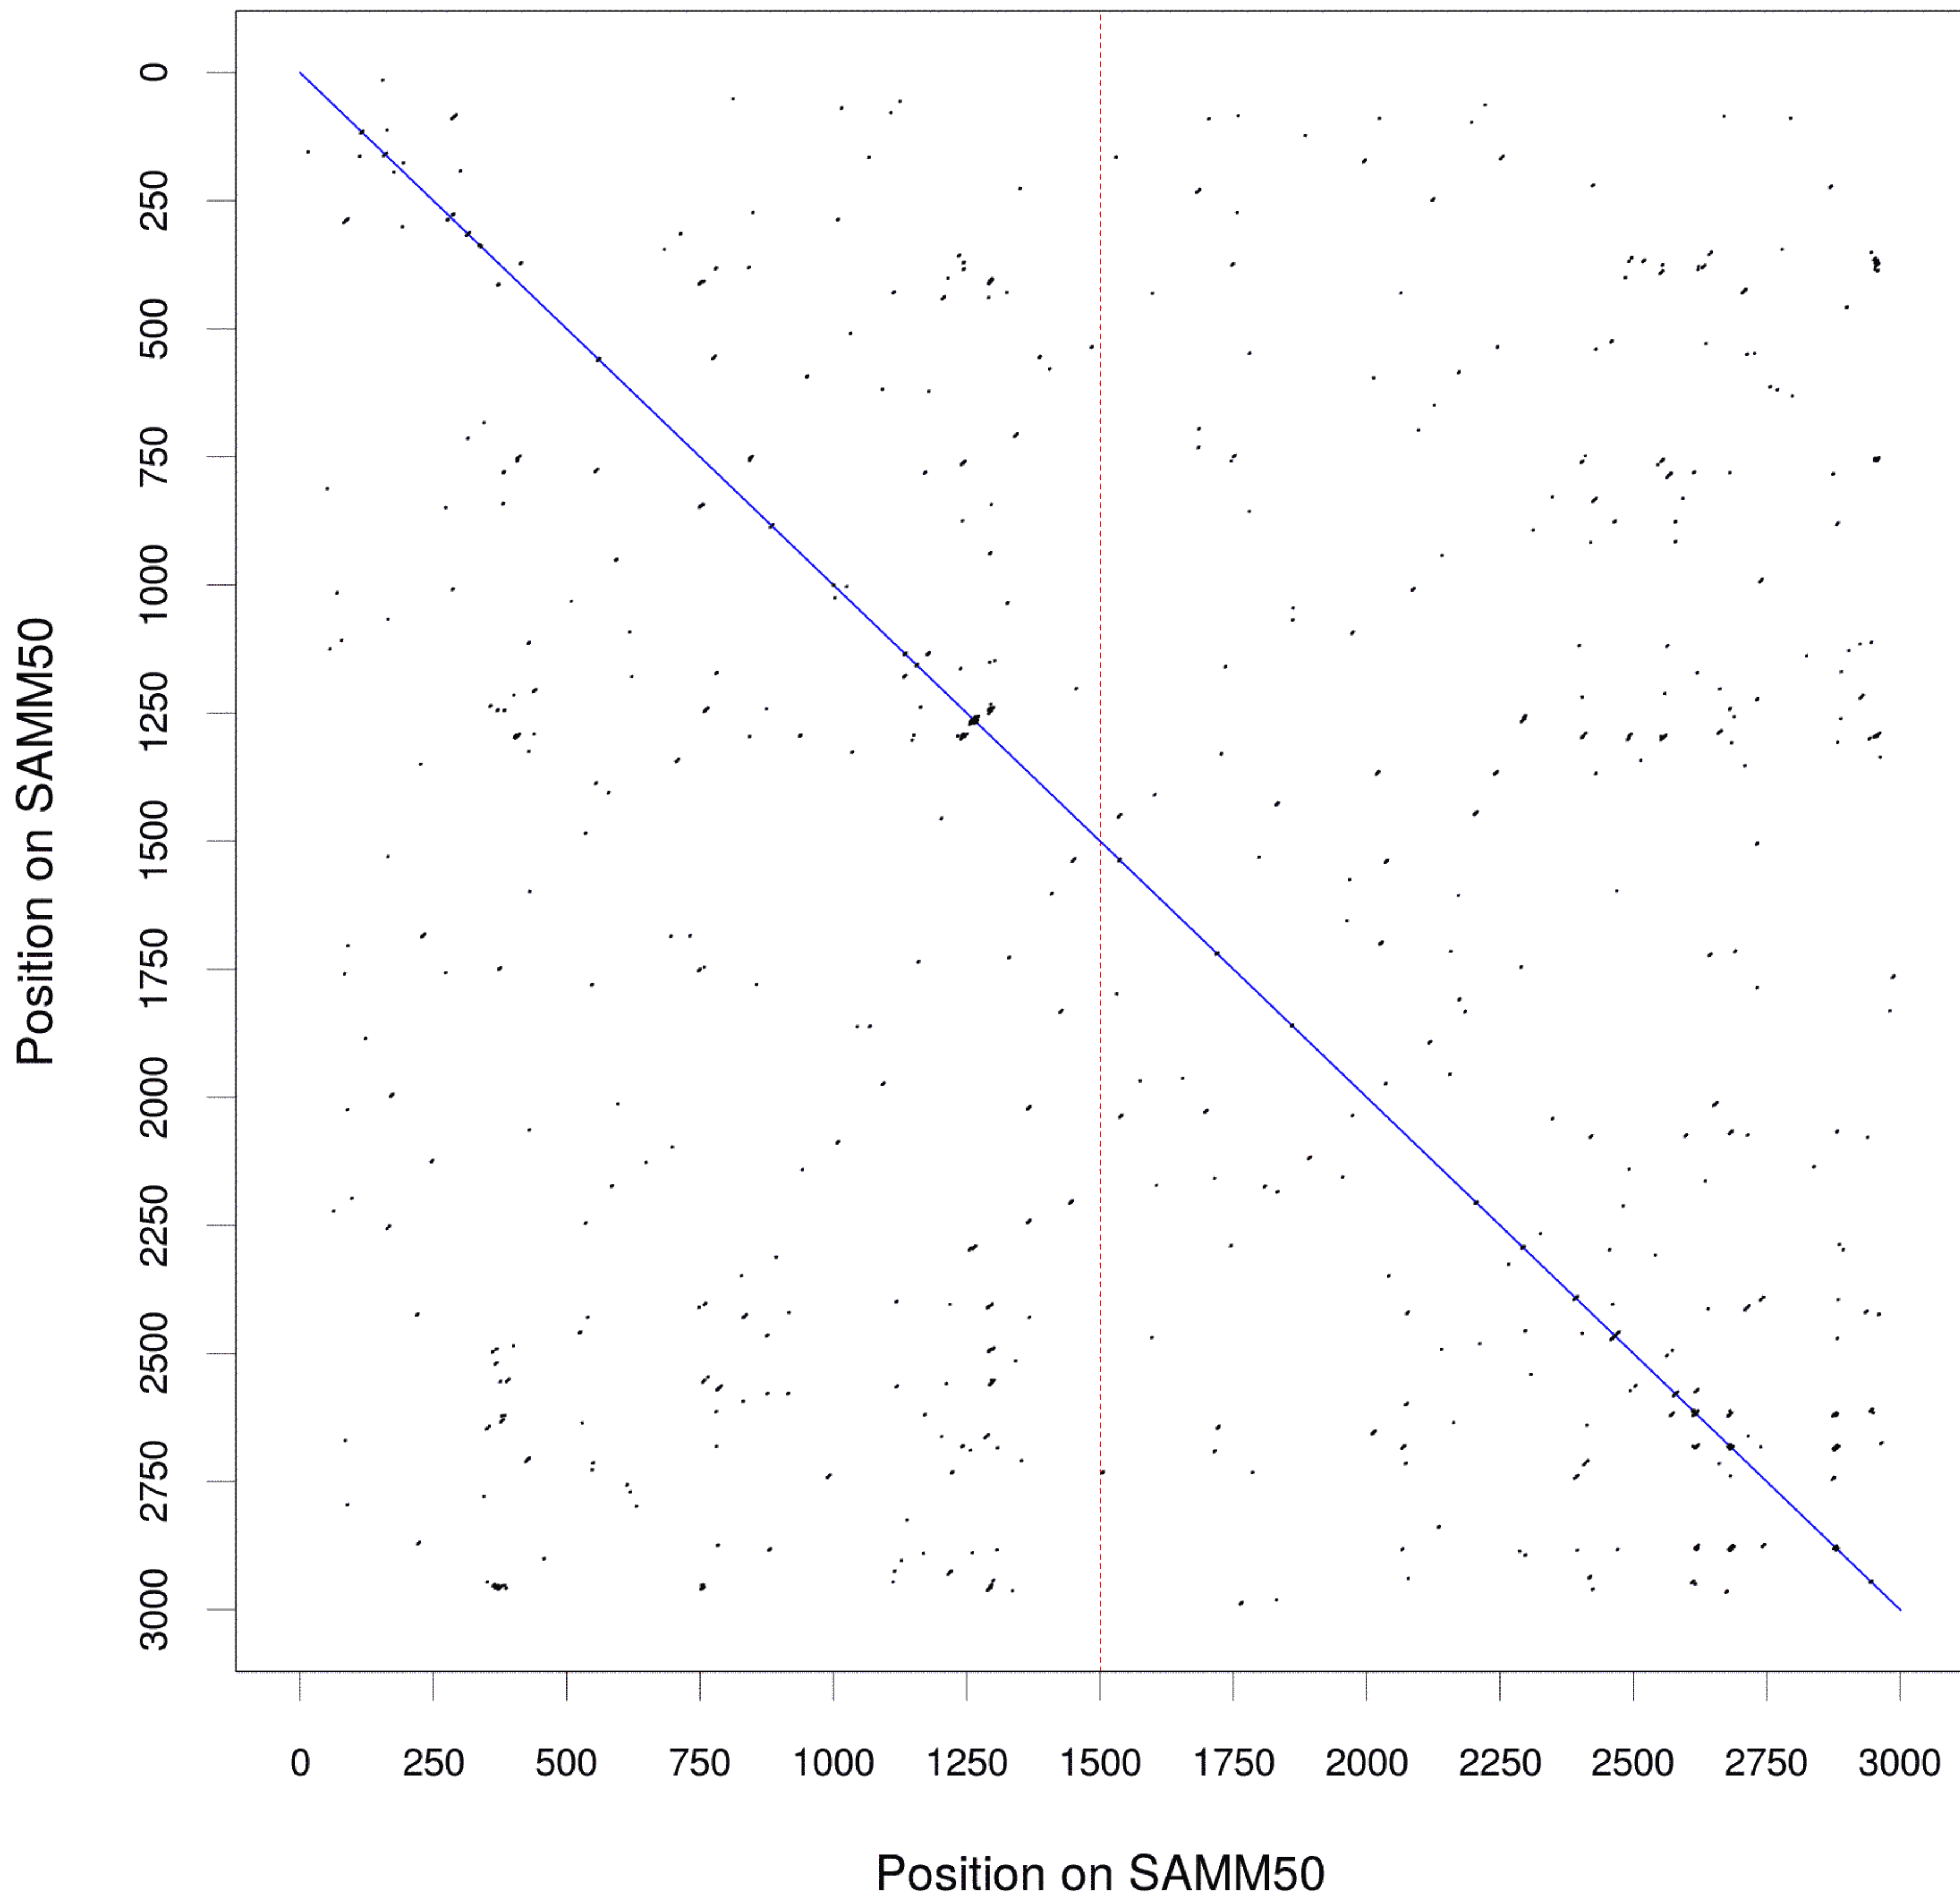

# SCN1B

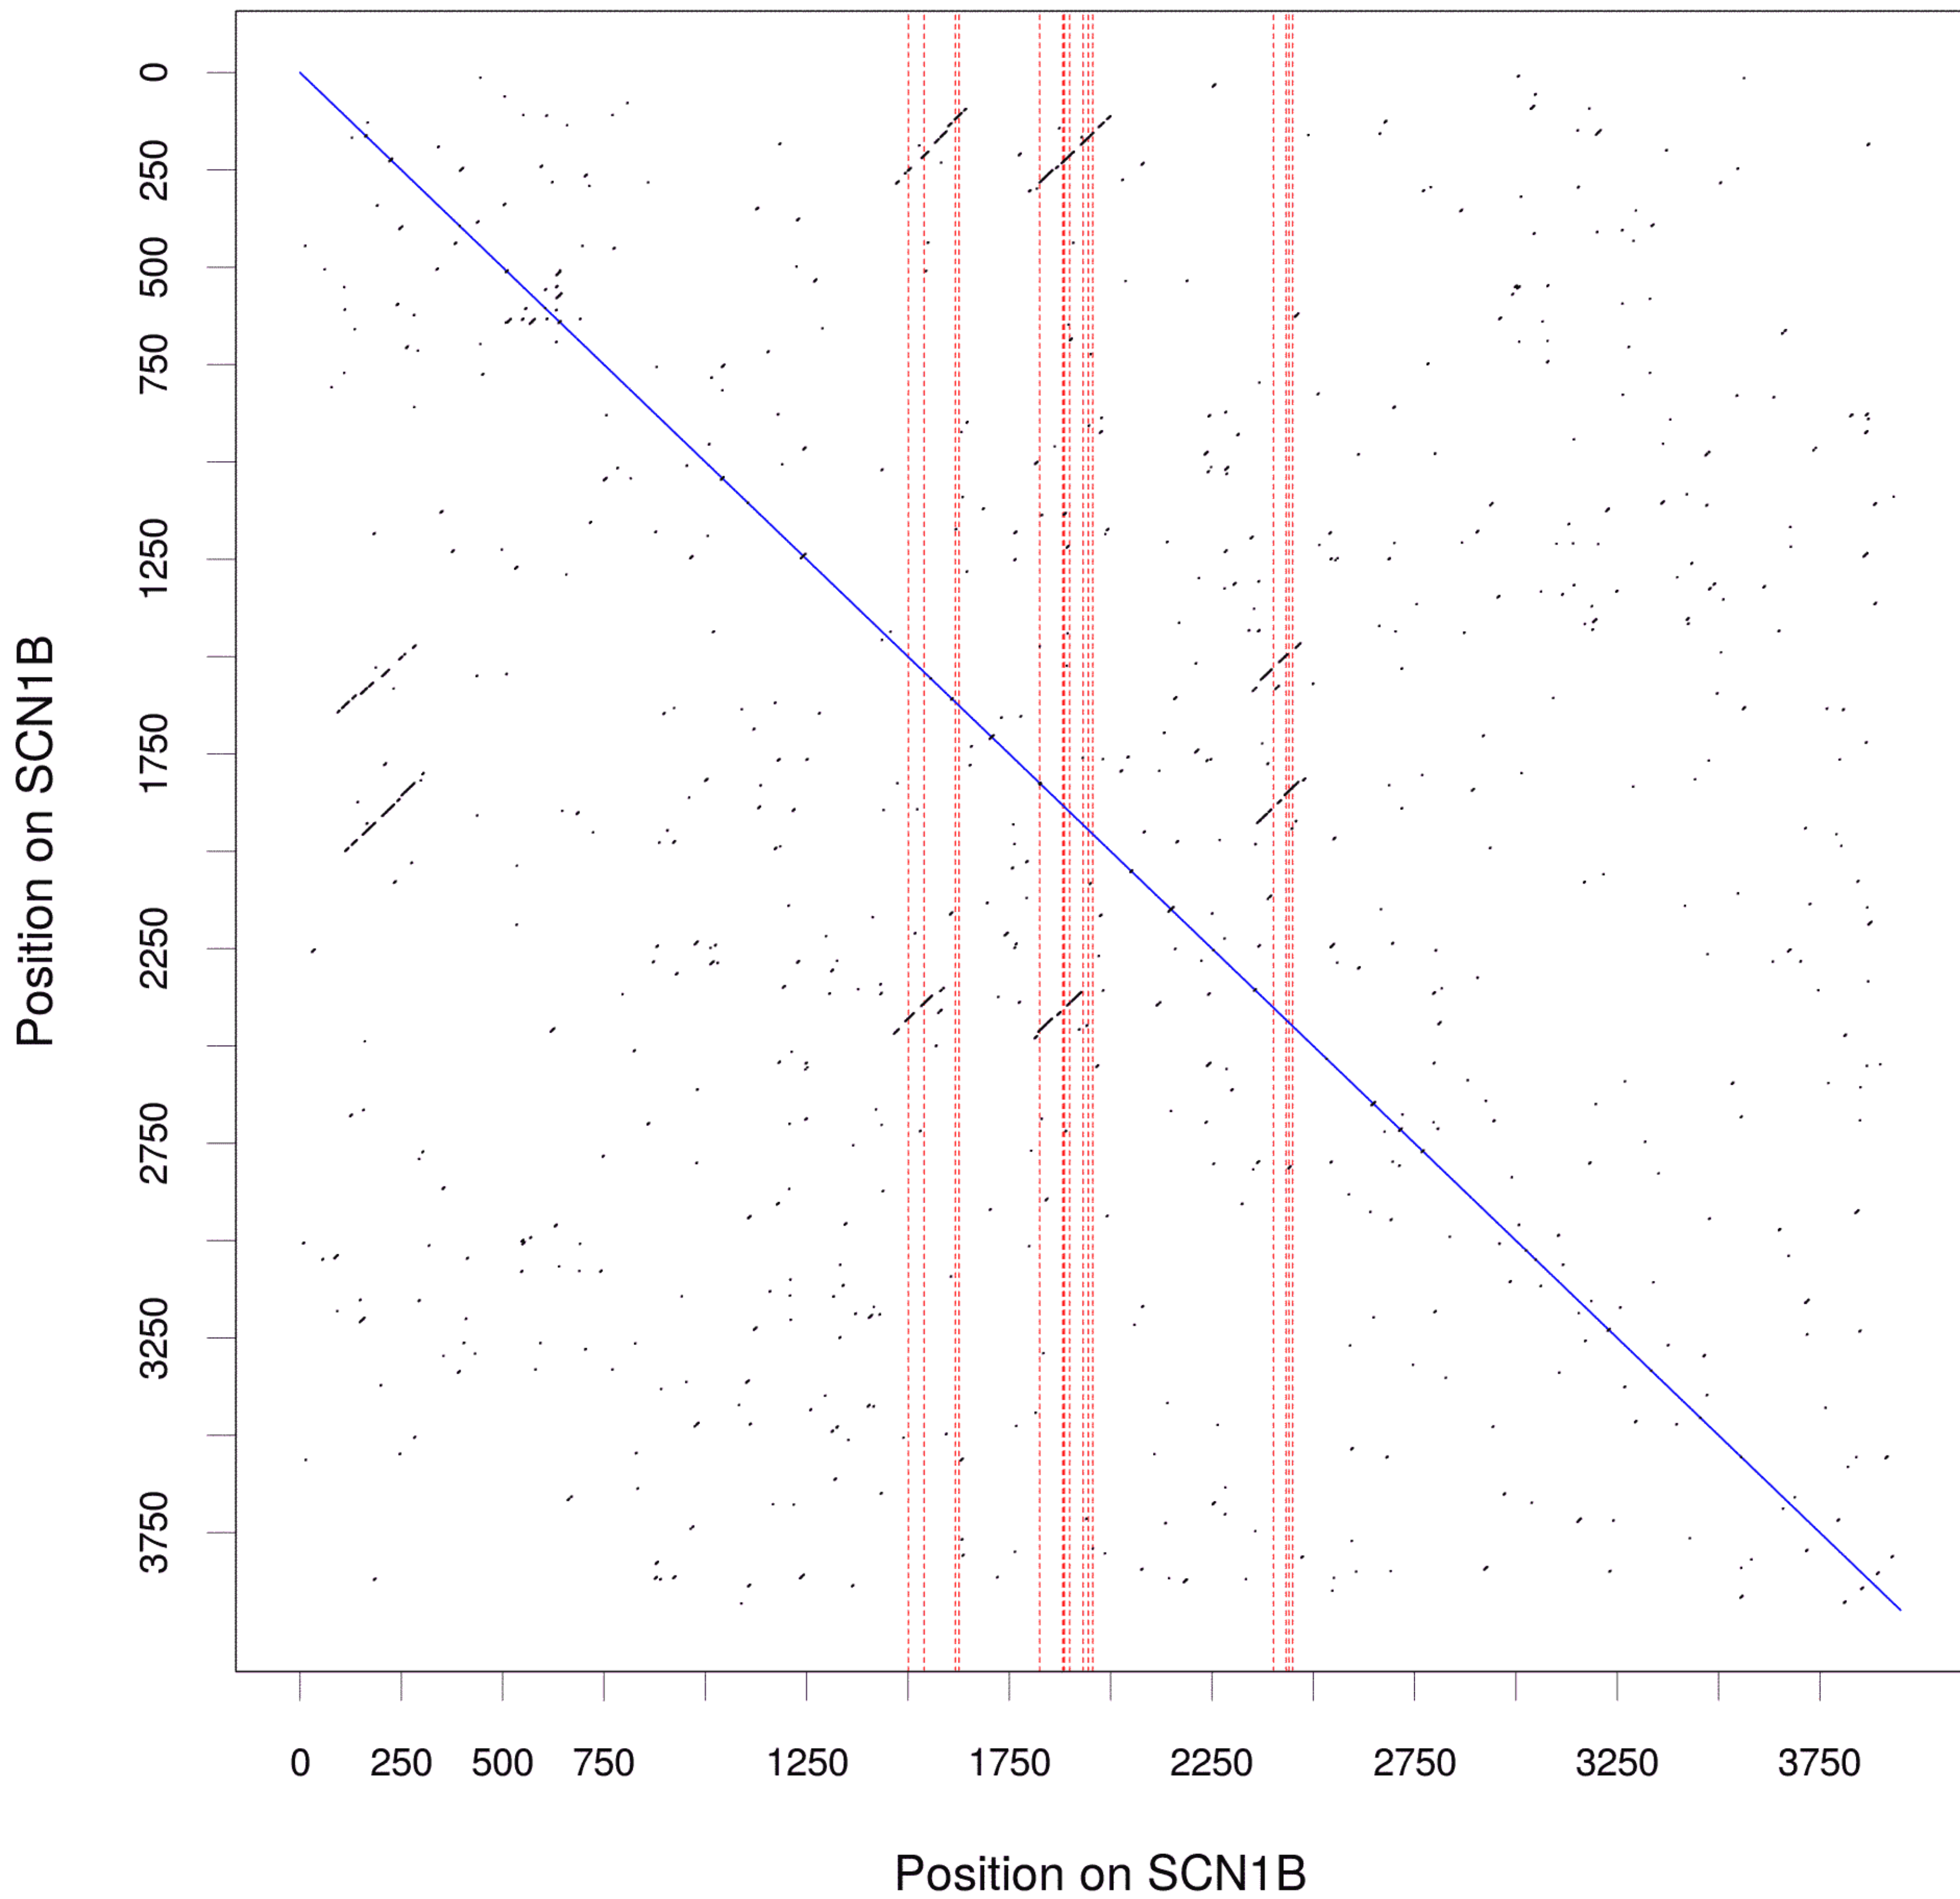

# SEC11C

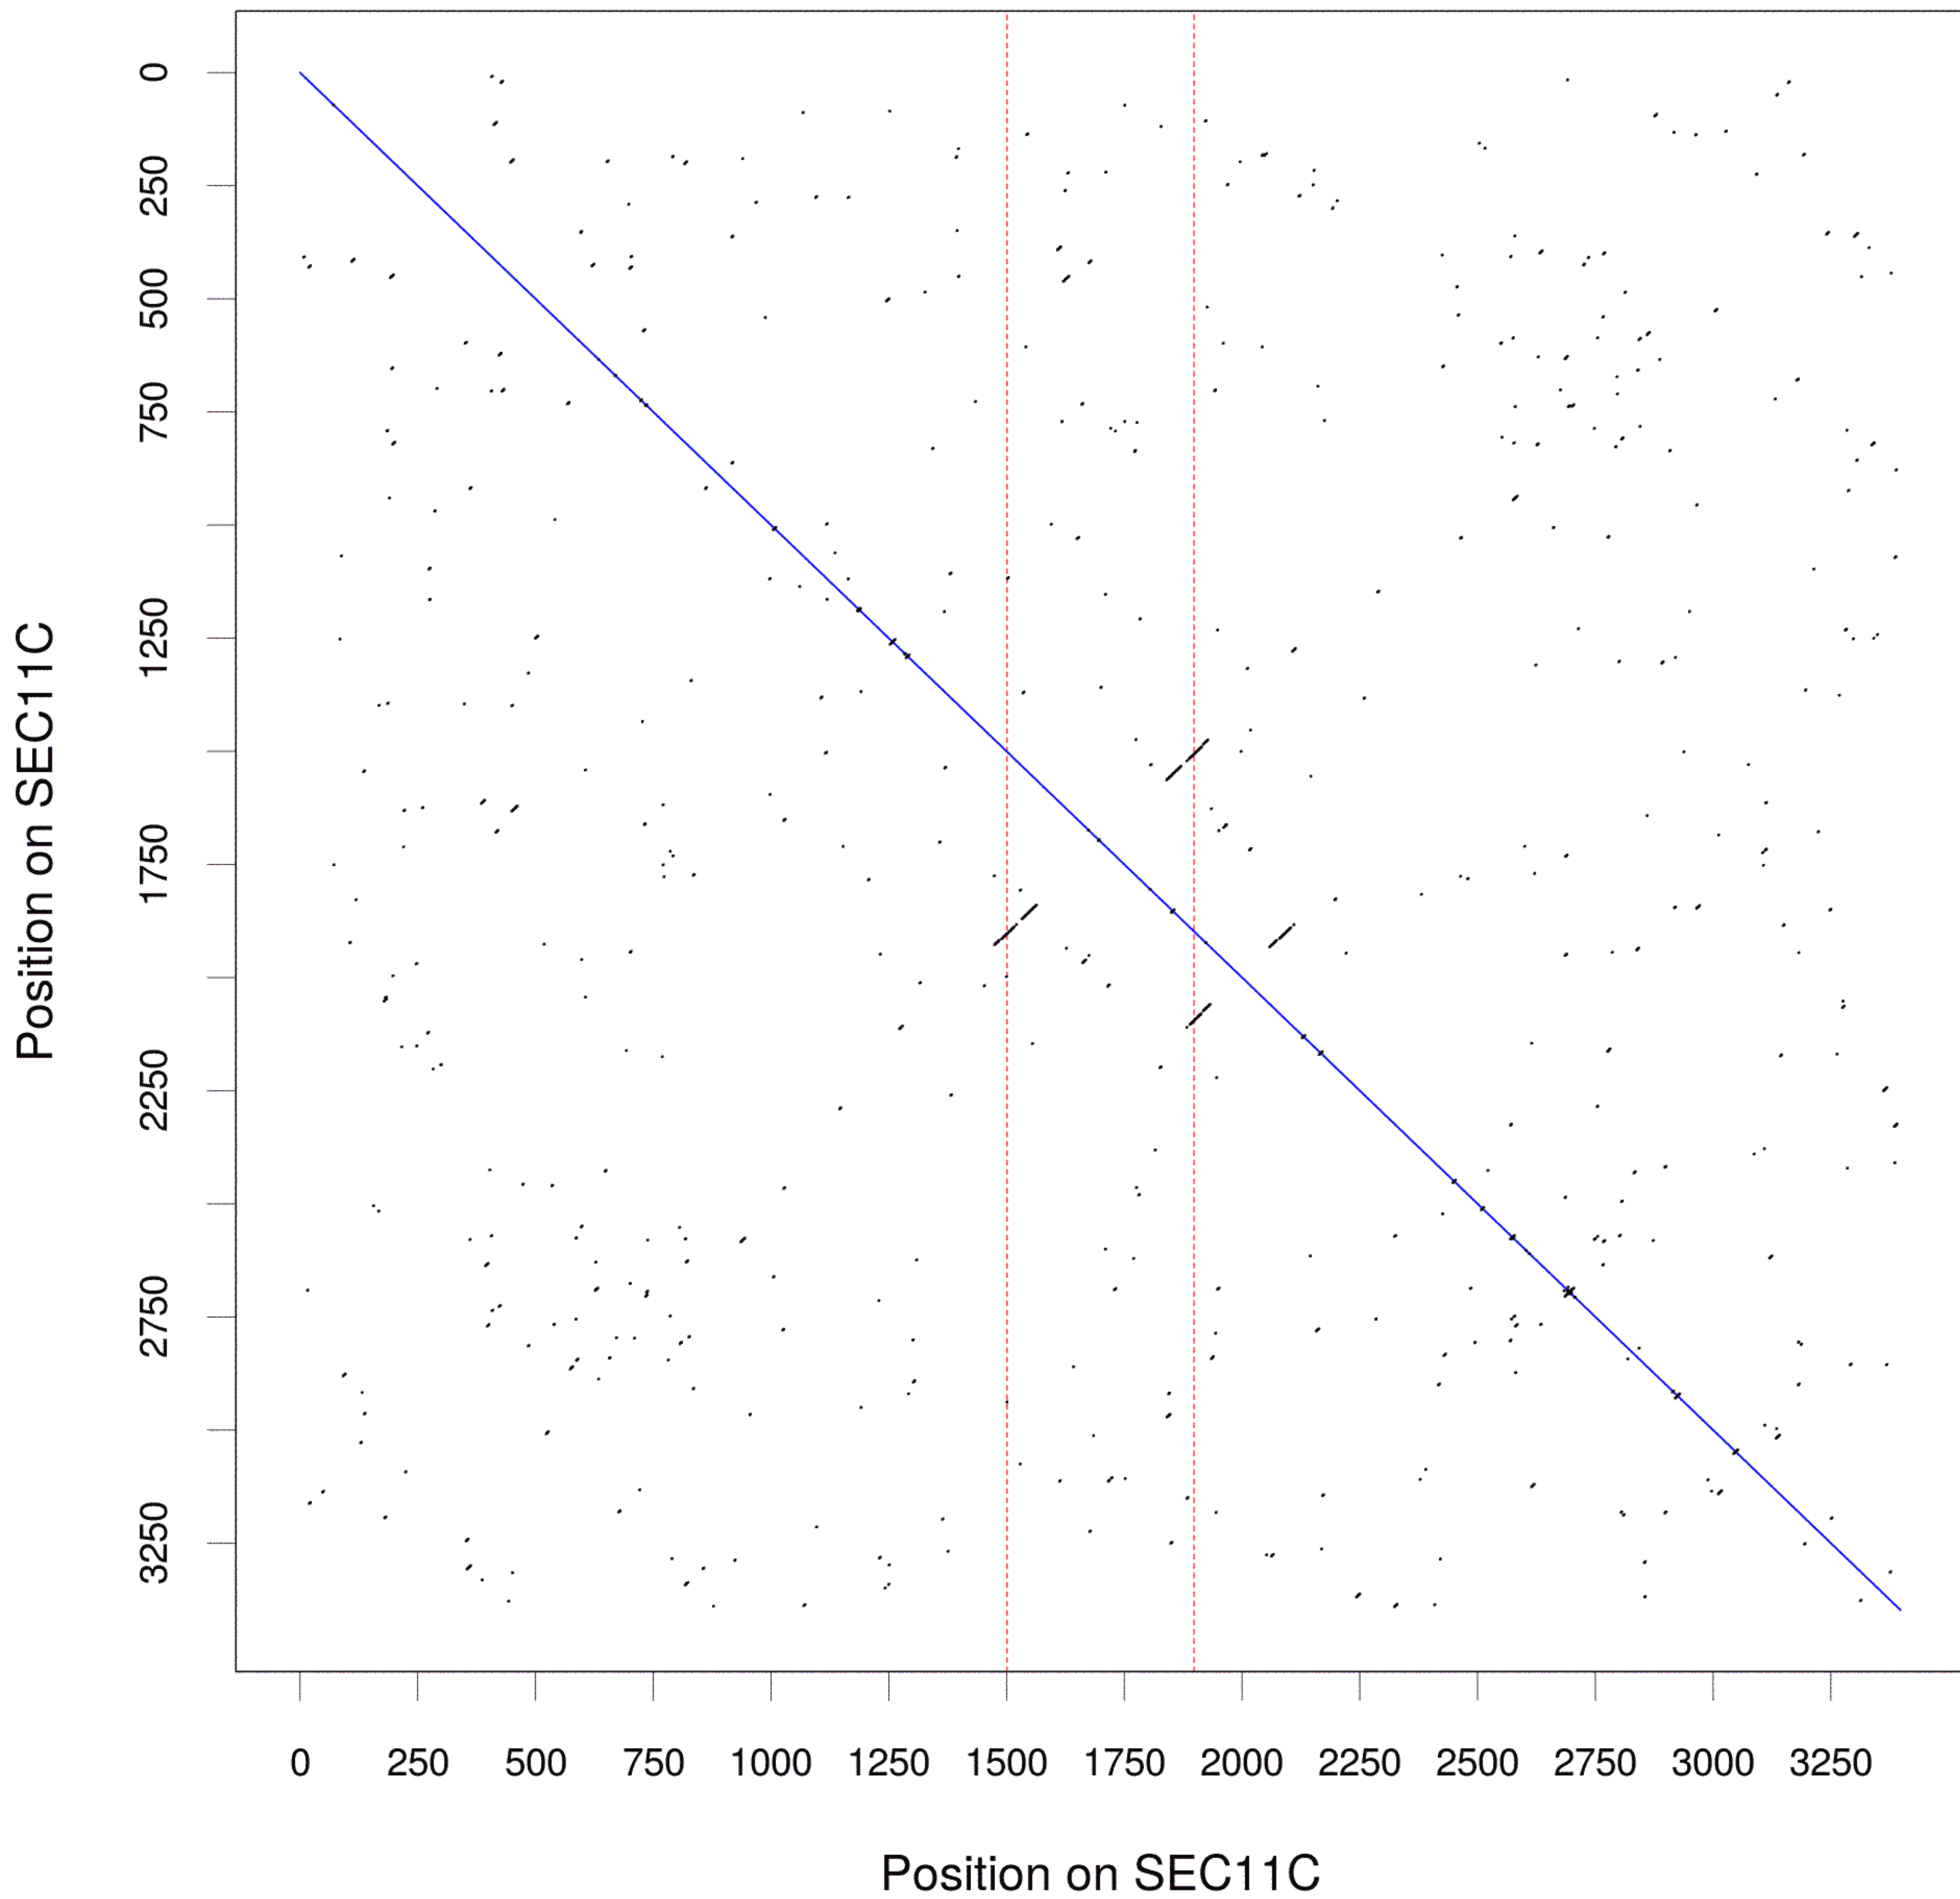

# SEC22B

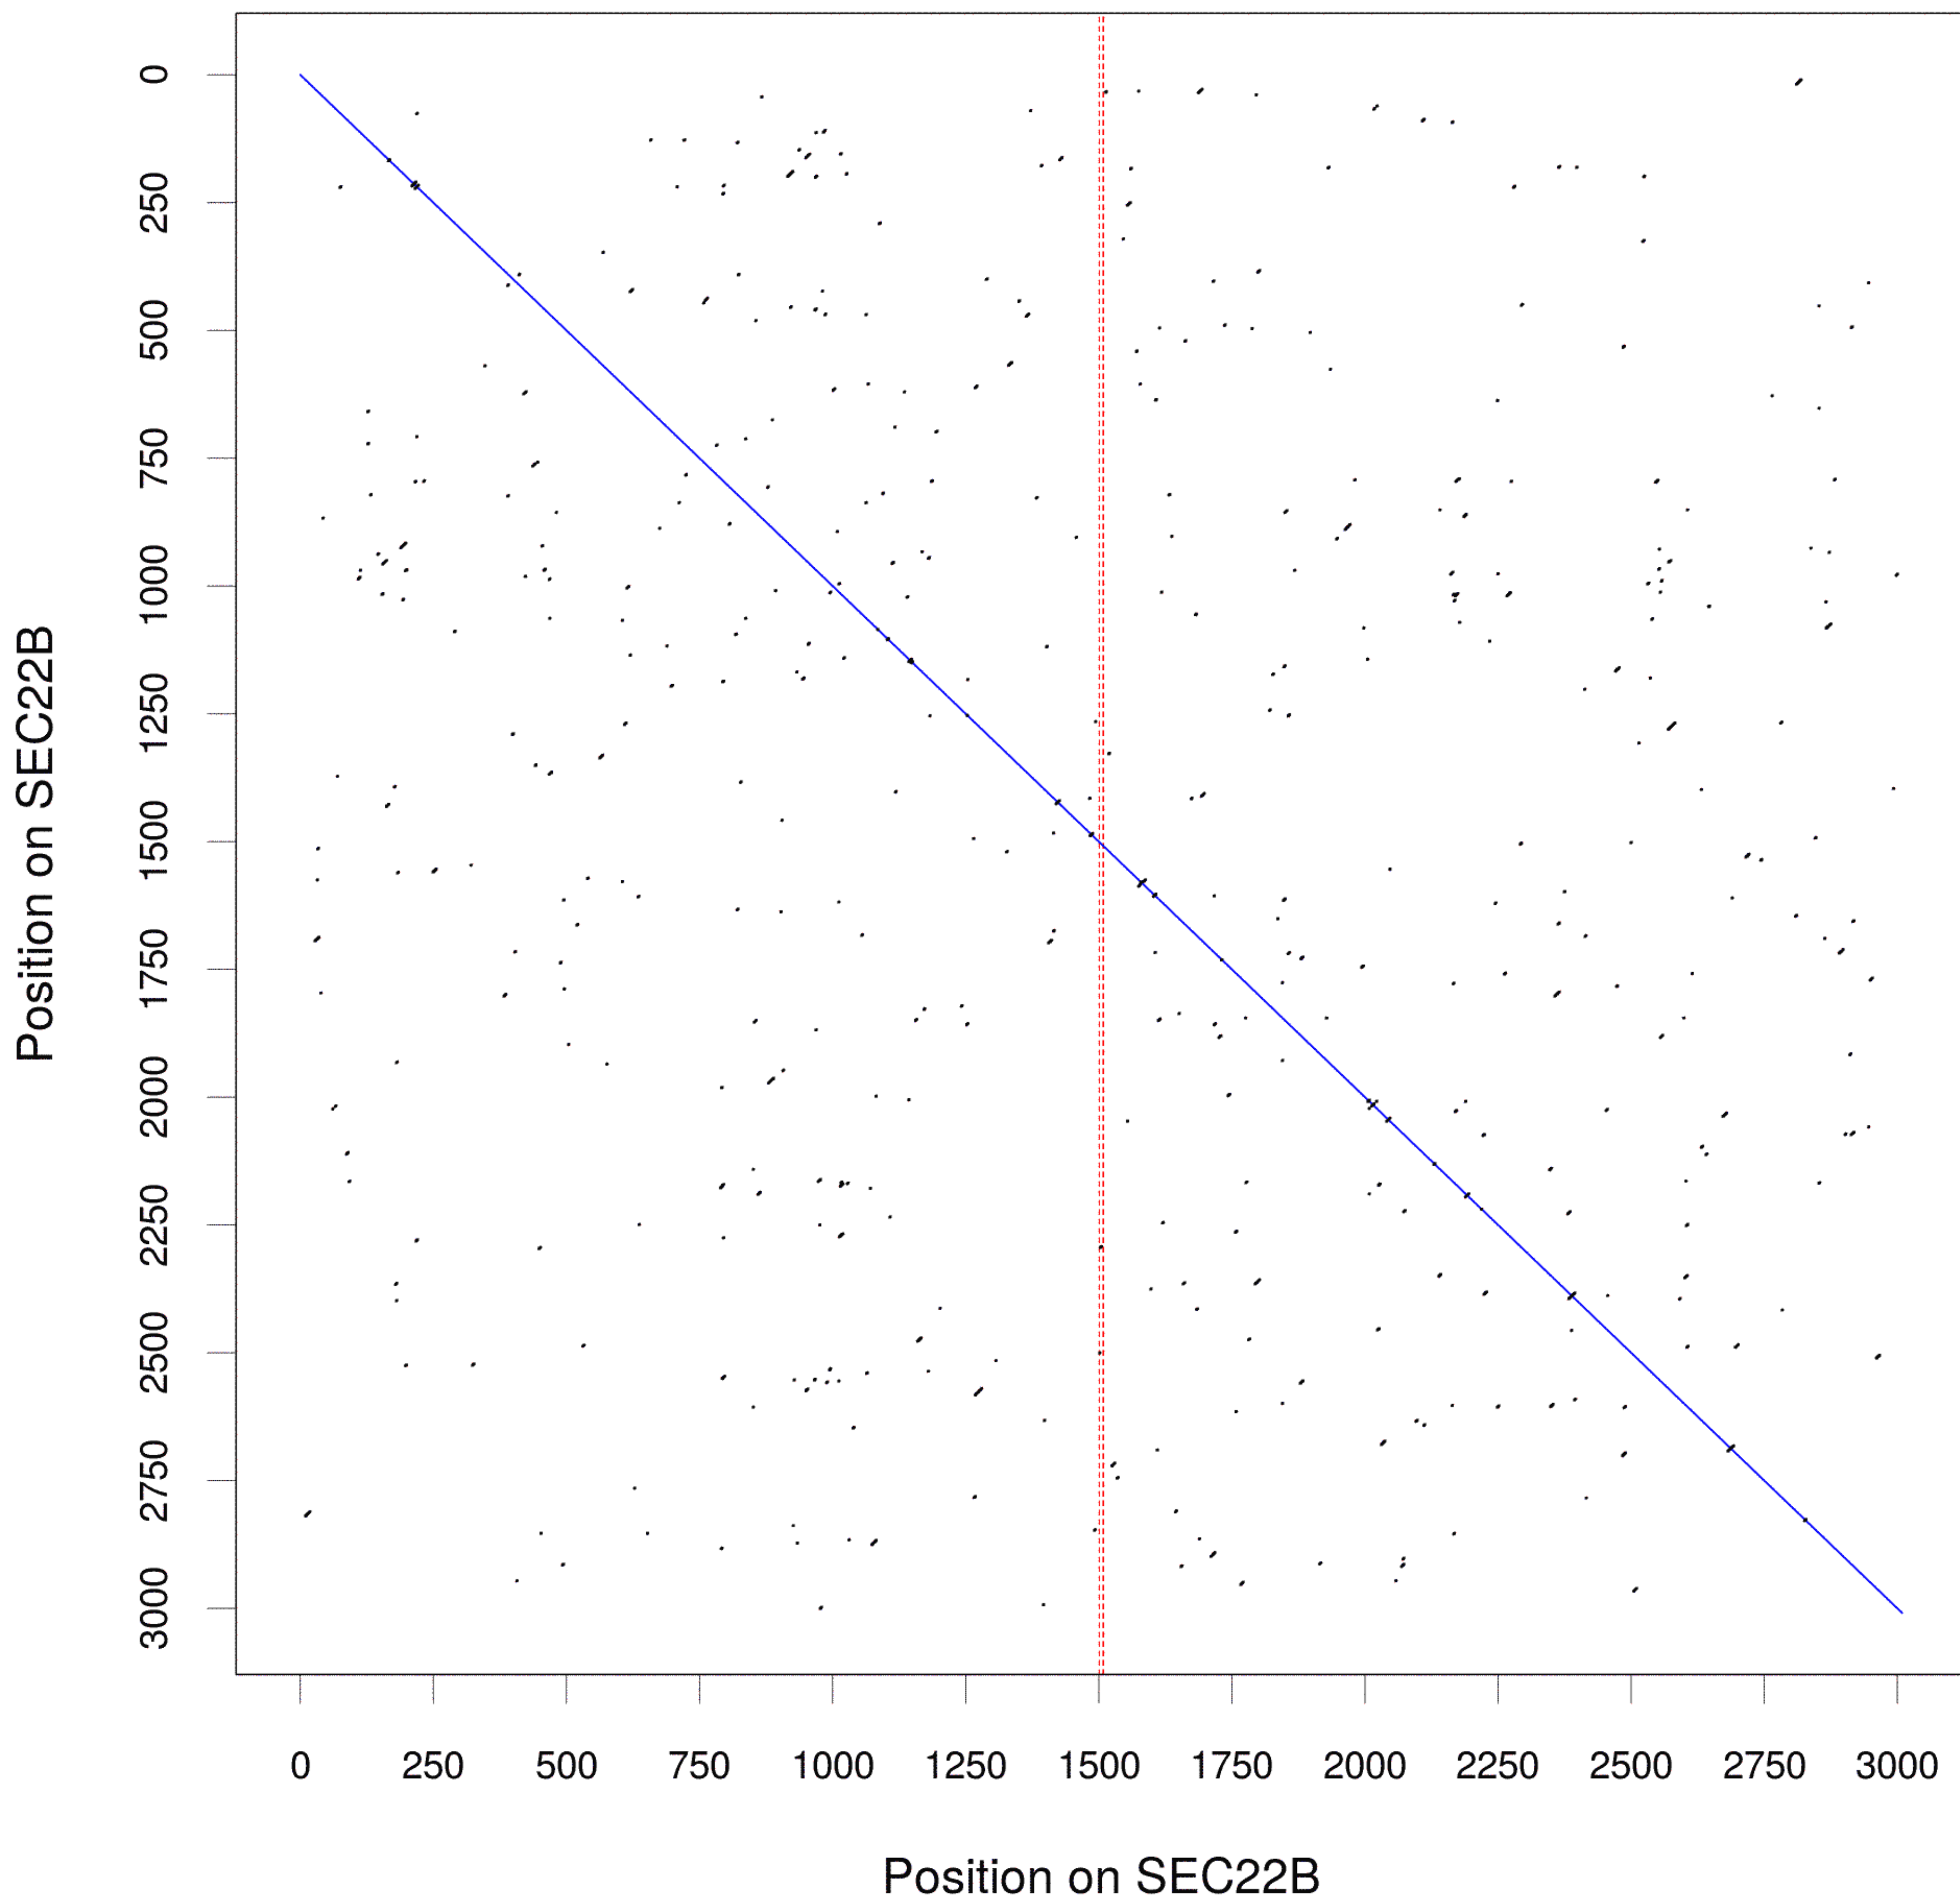

# SEC61A1

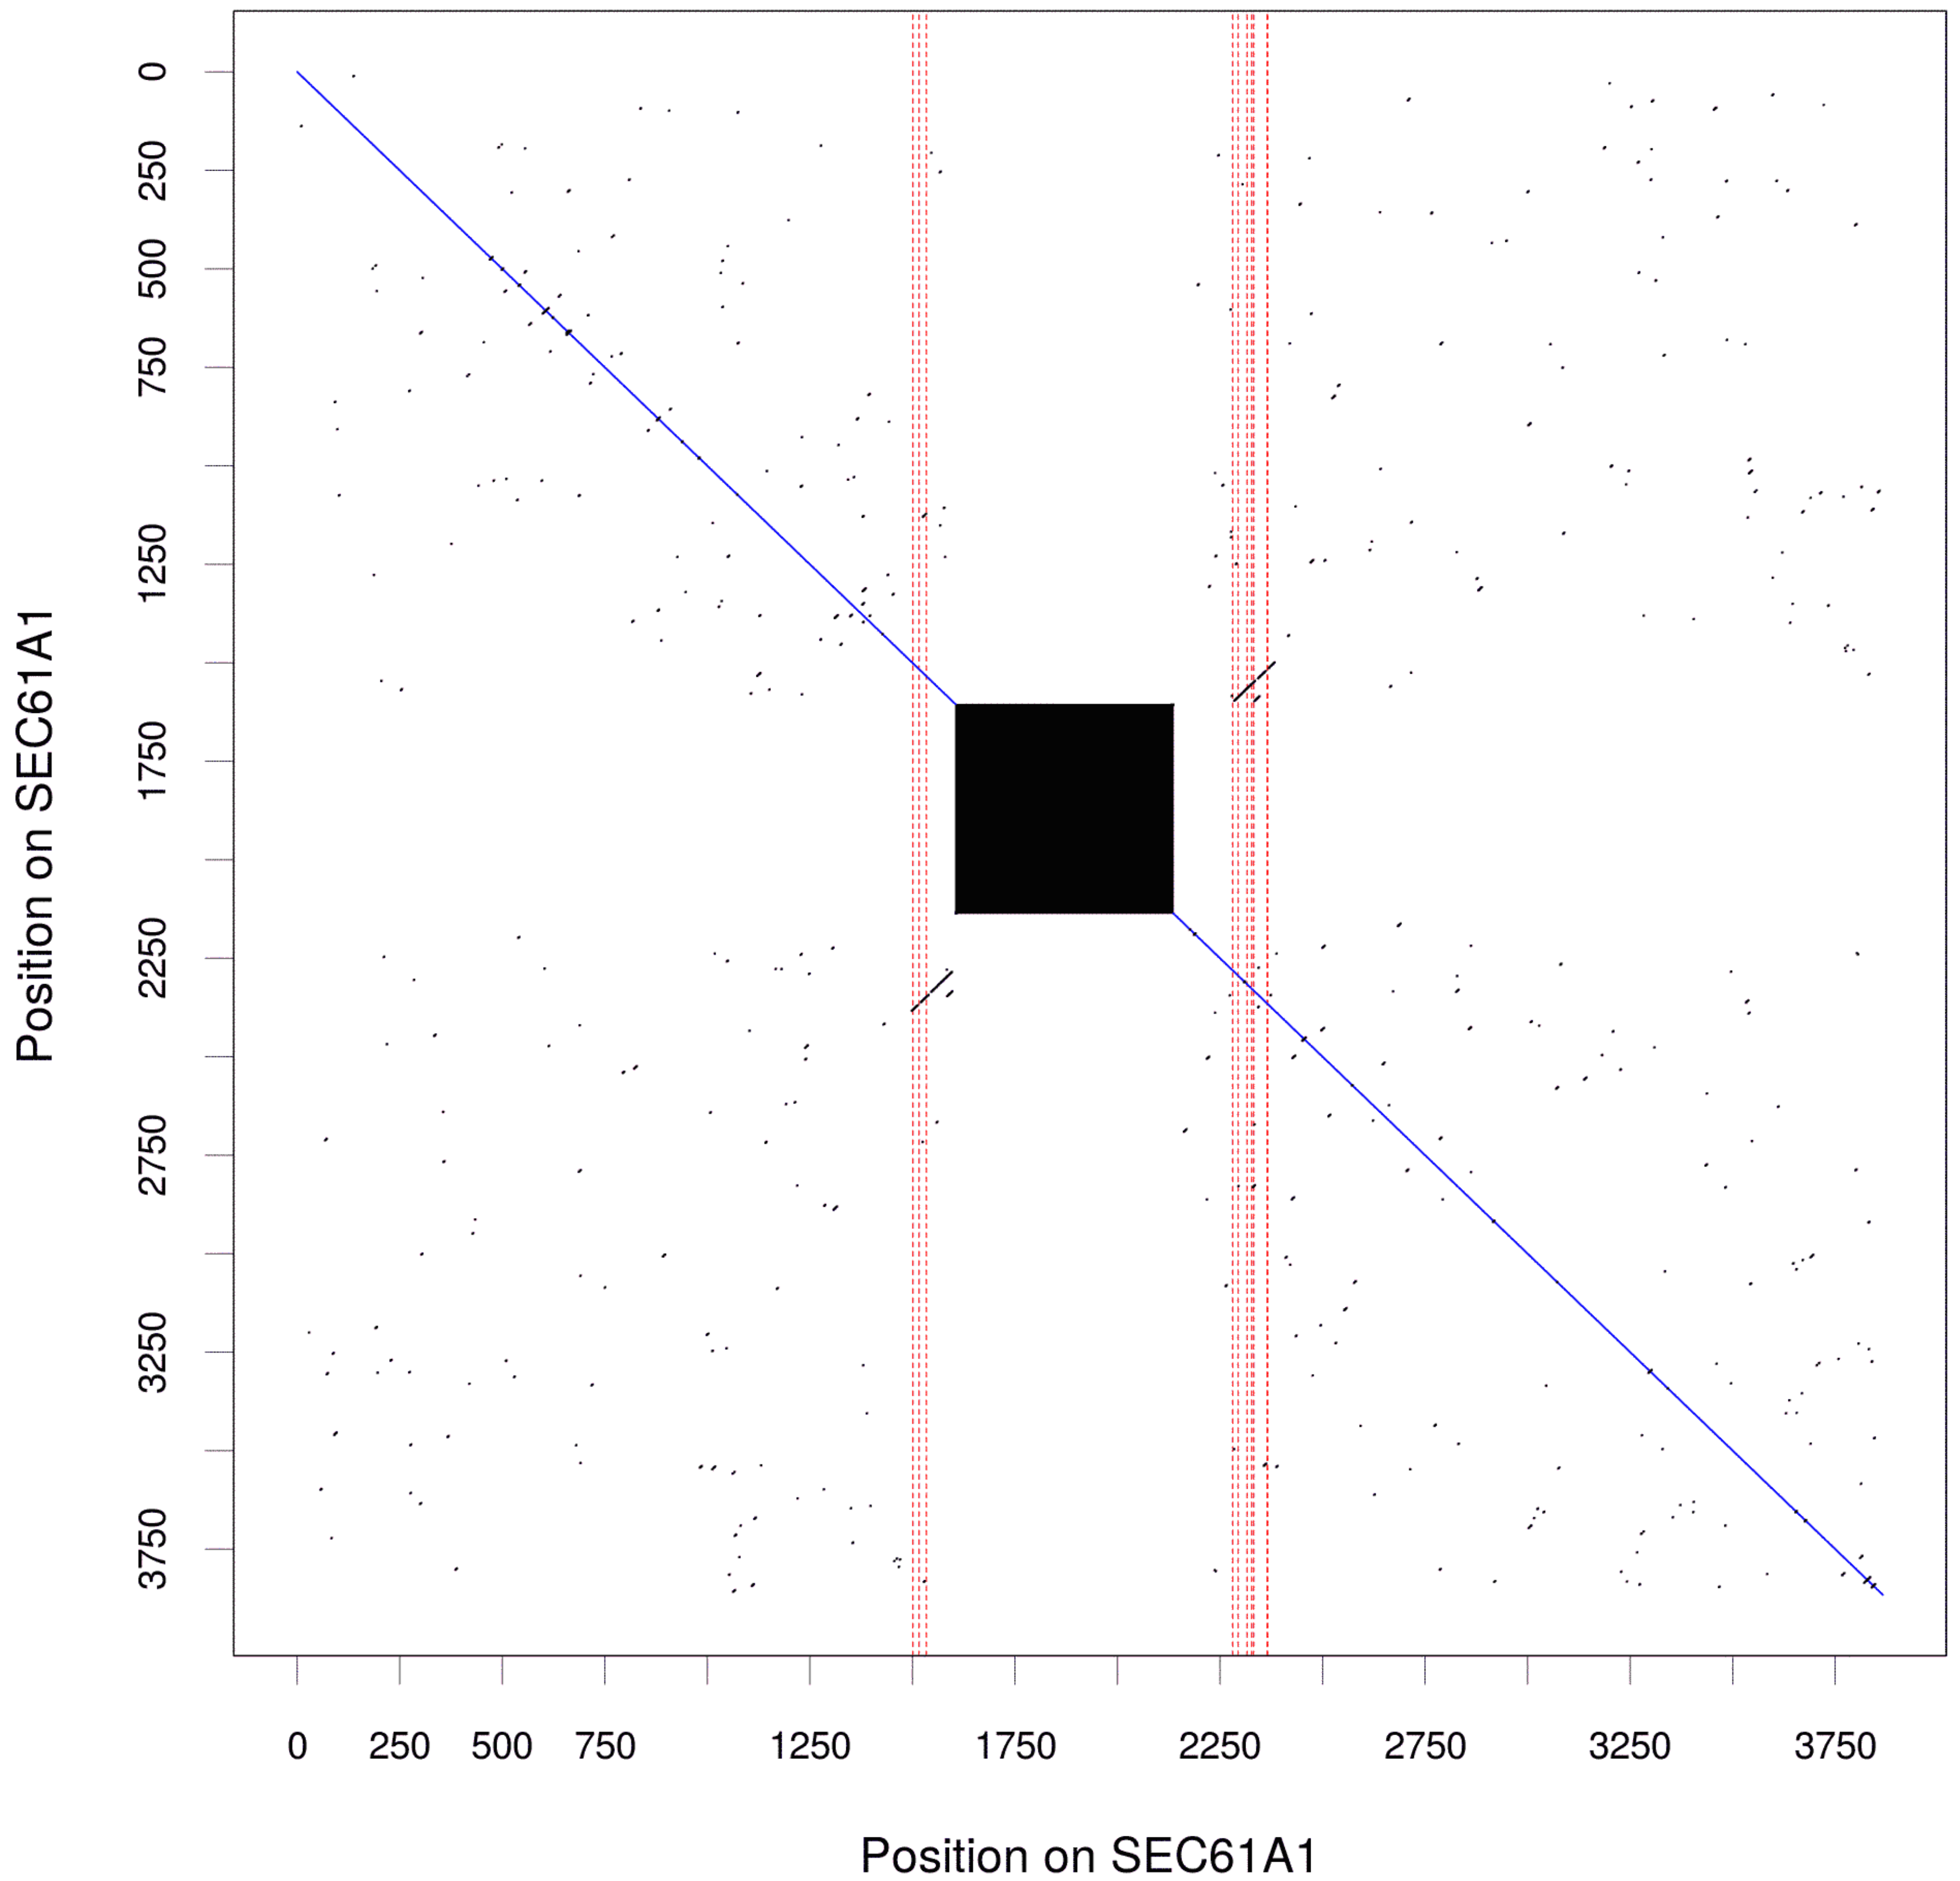

# SEPN1

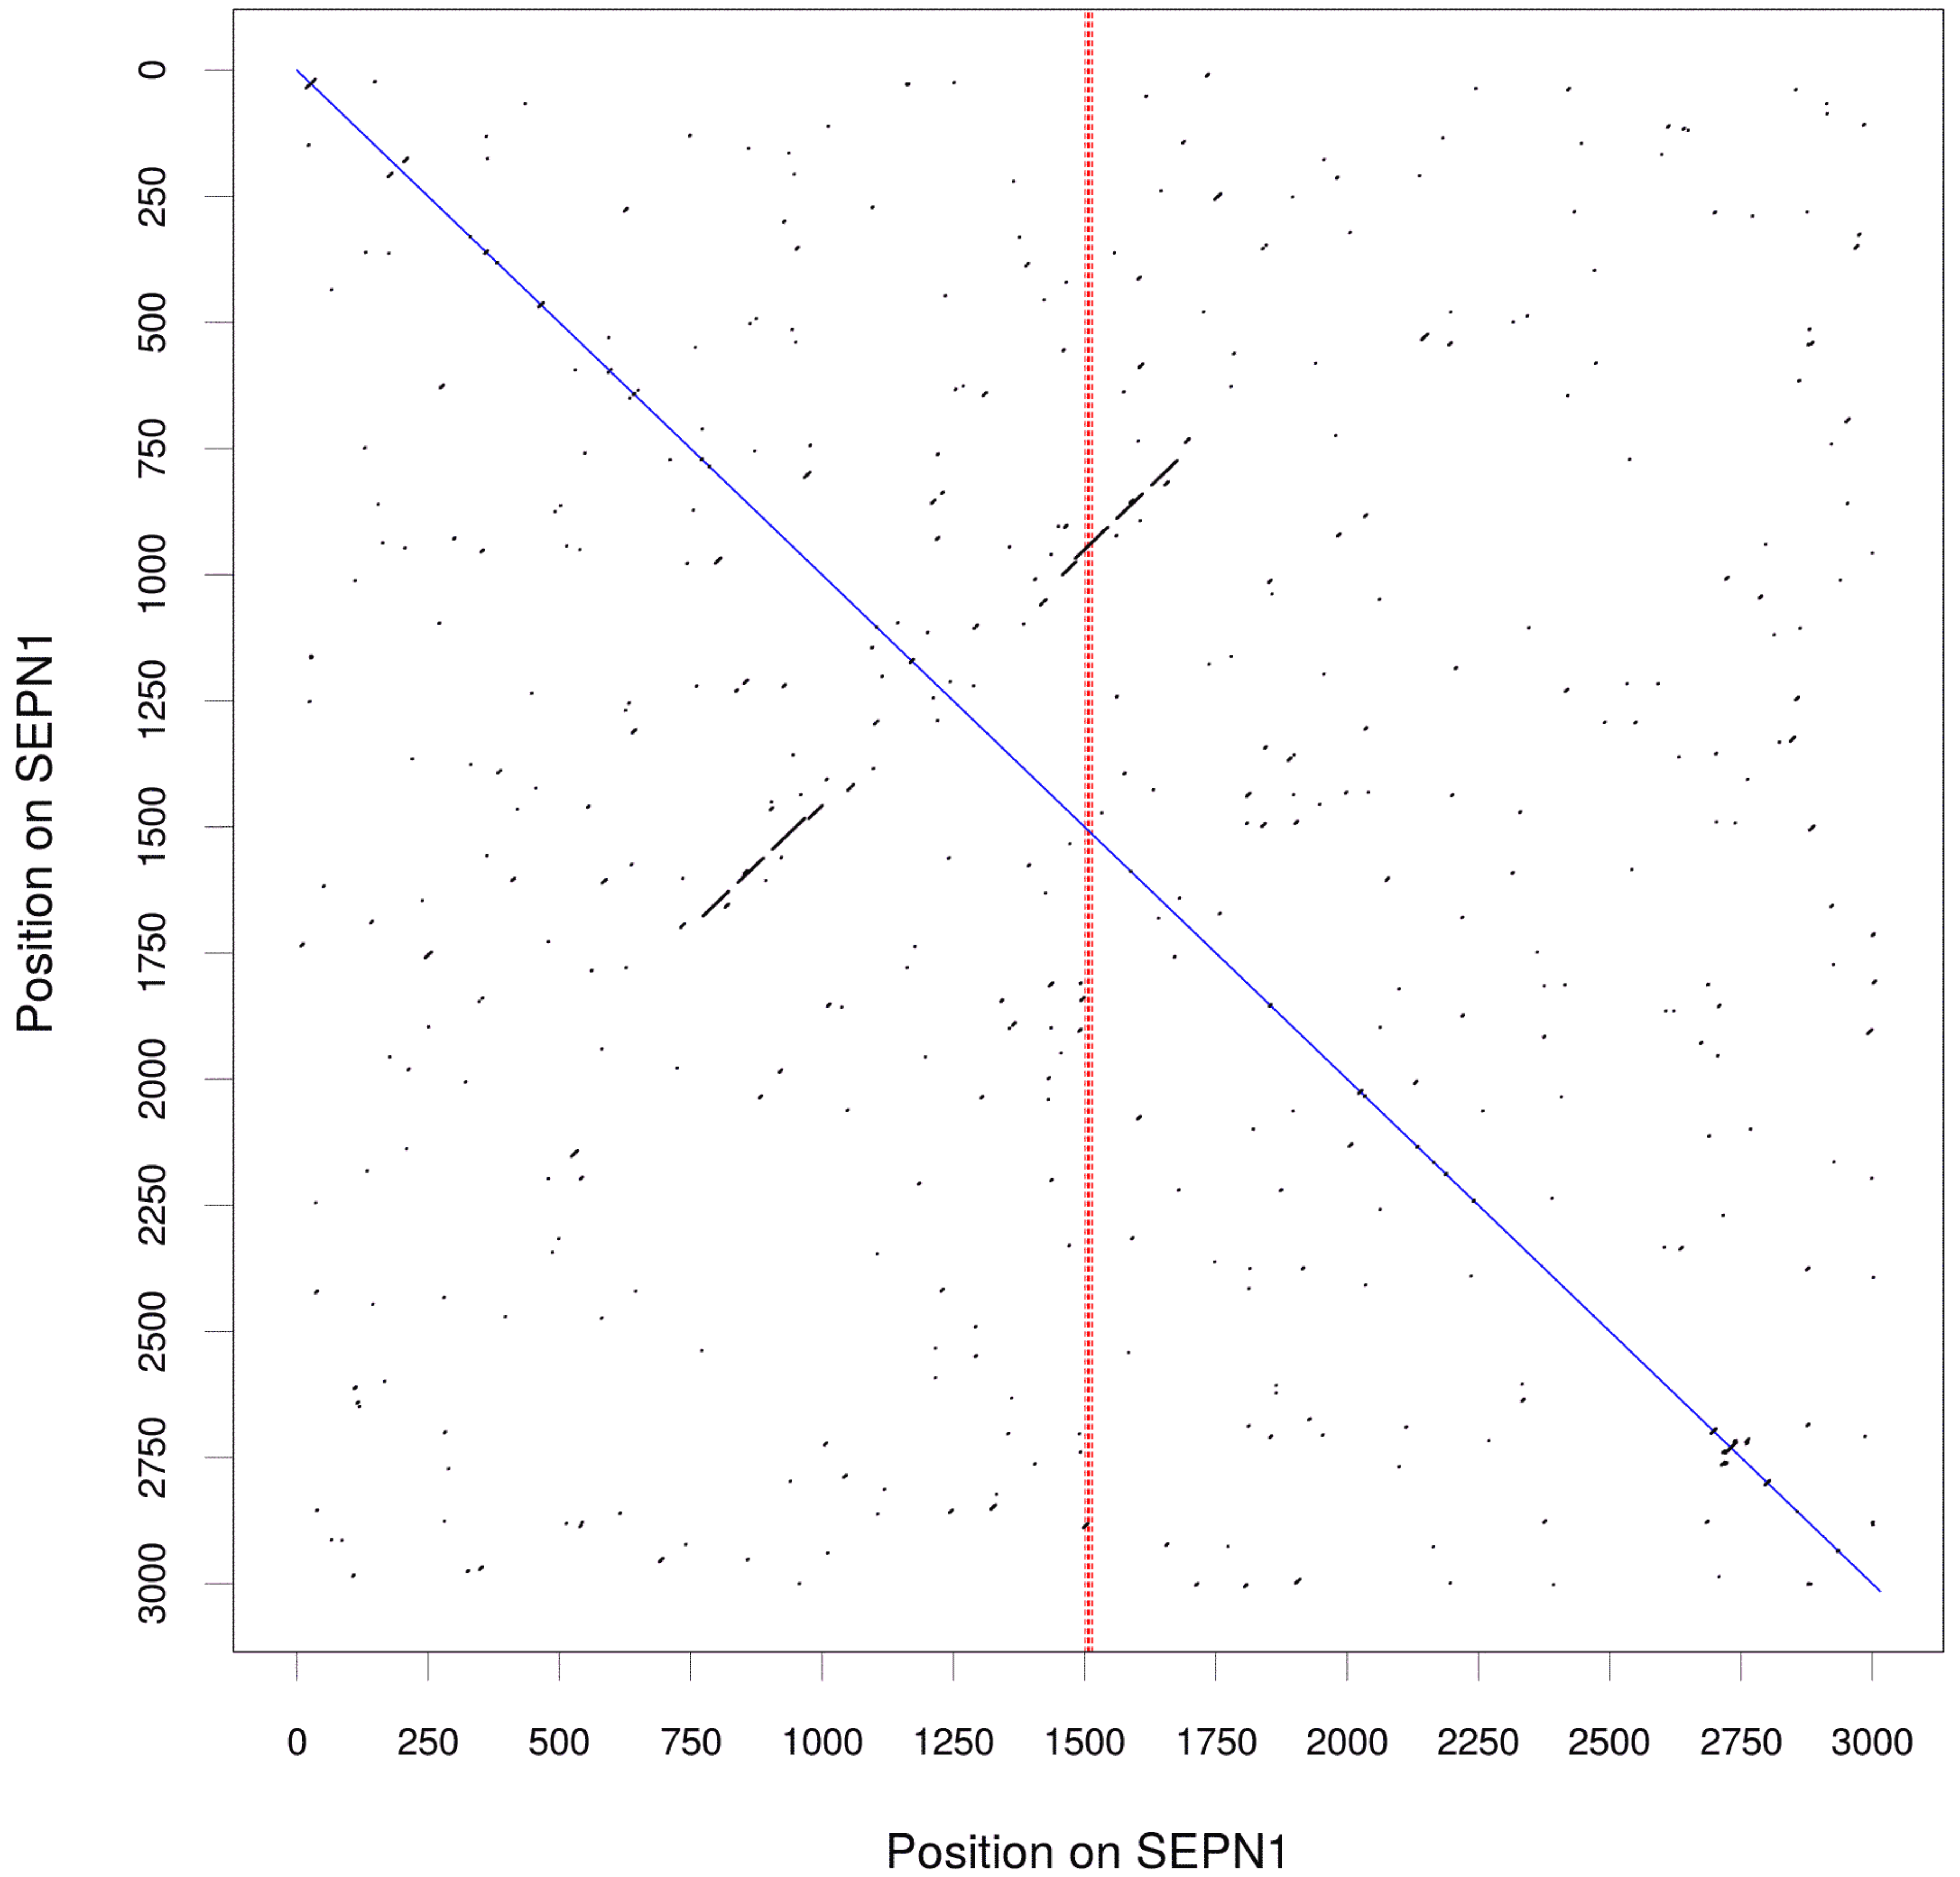

# SEPT4

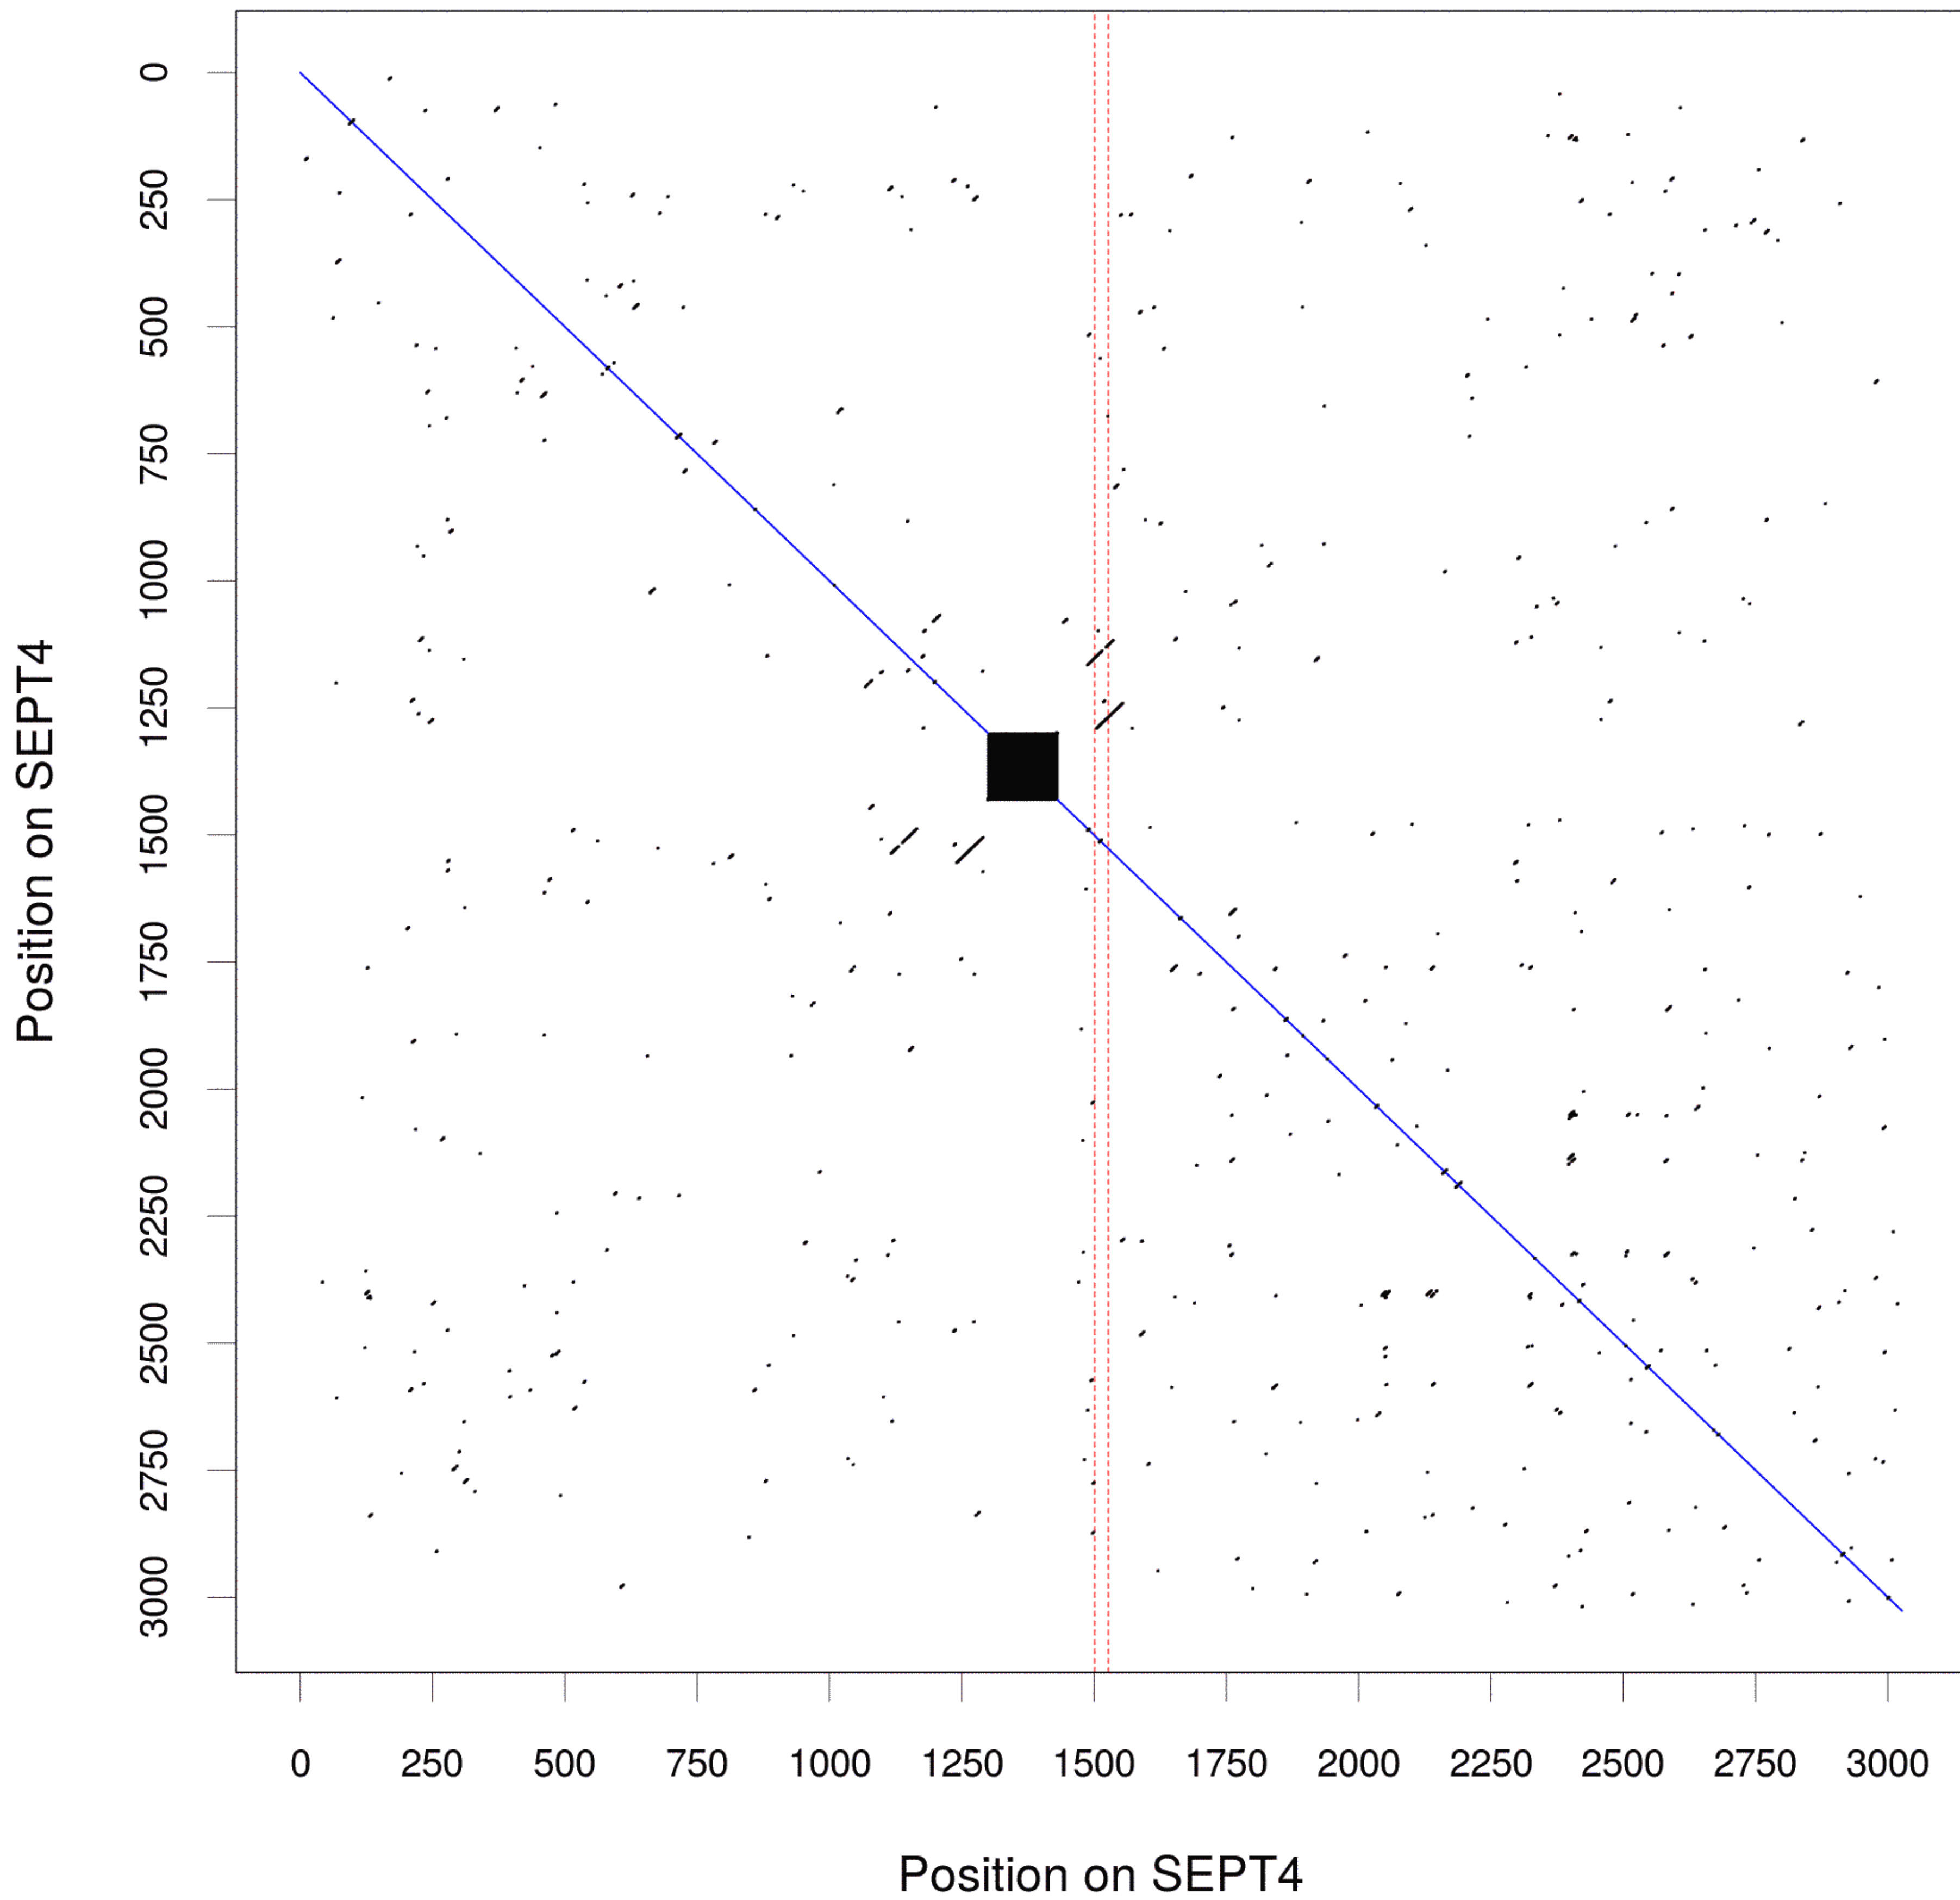

# SETMAR

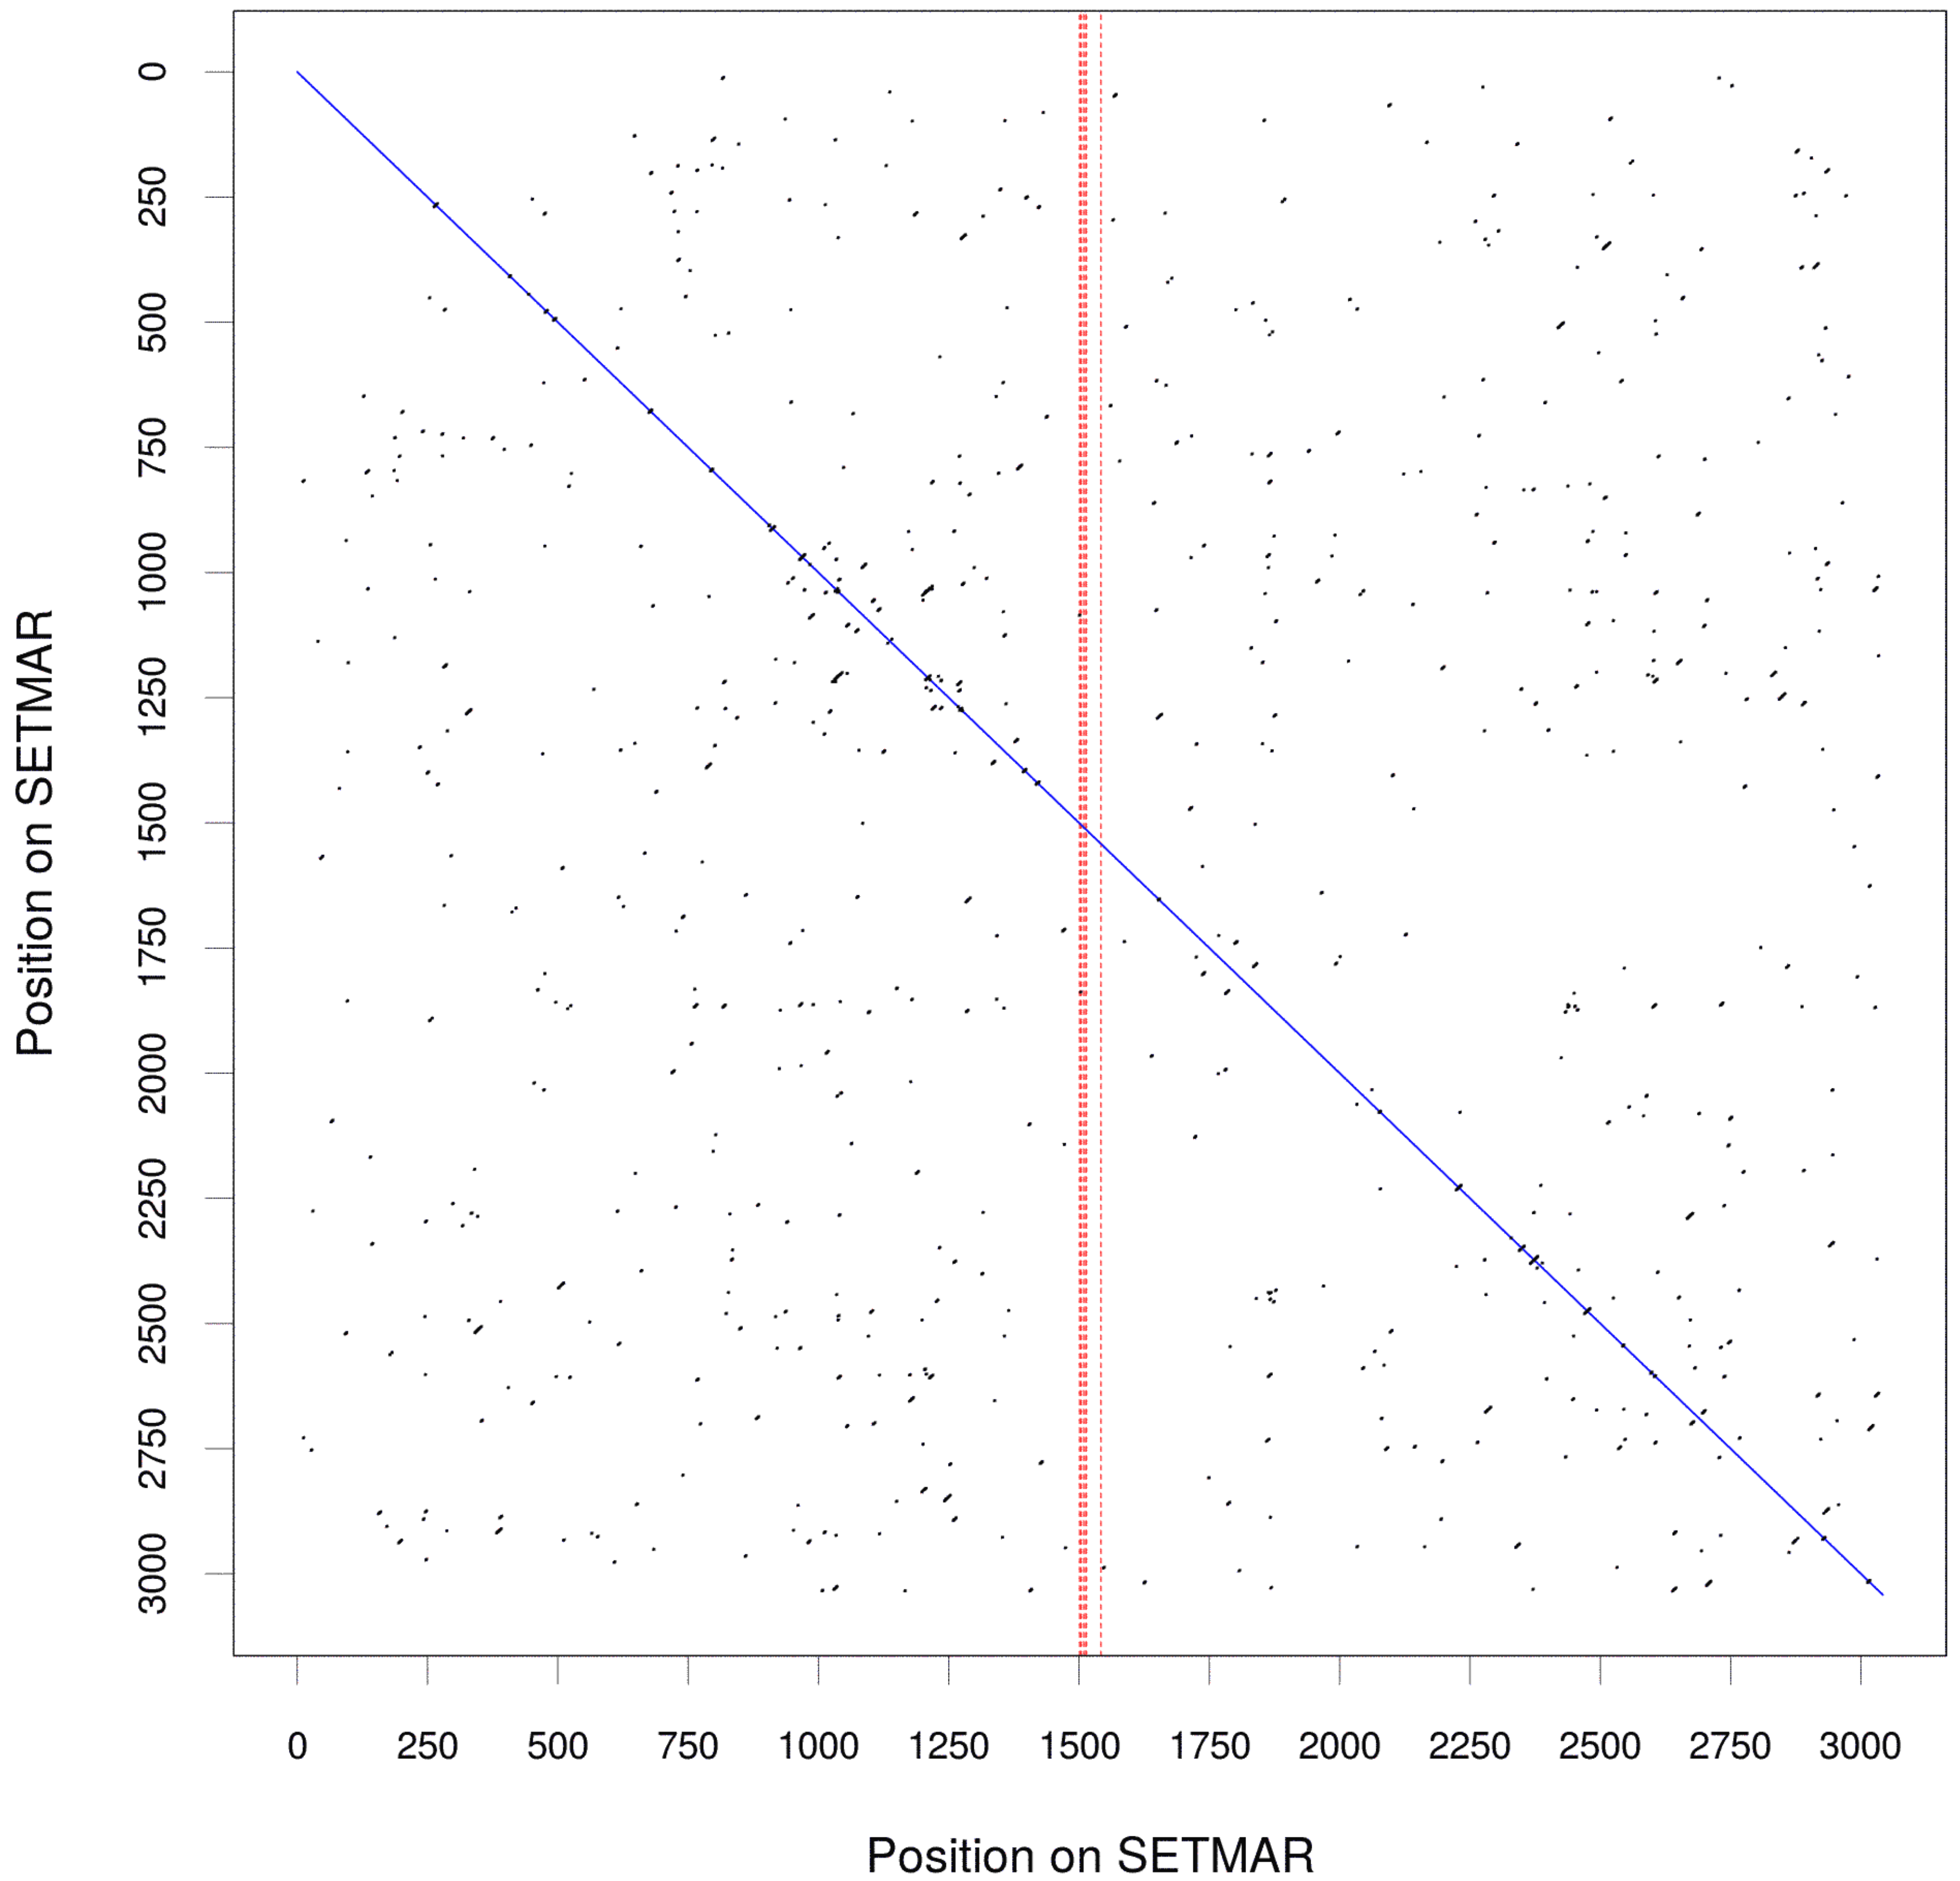



# SGPP1

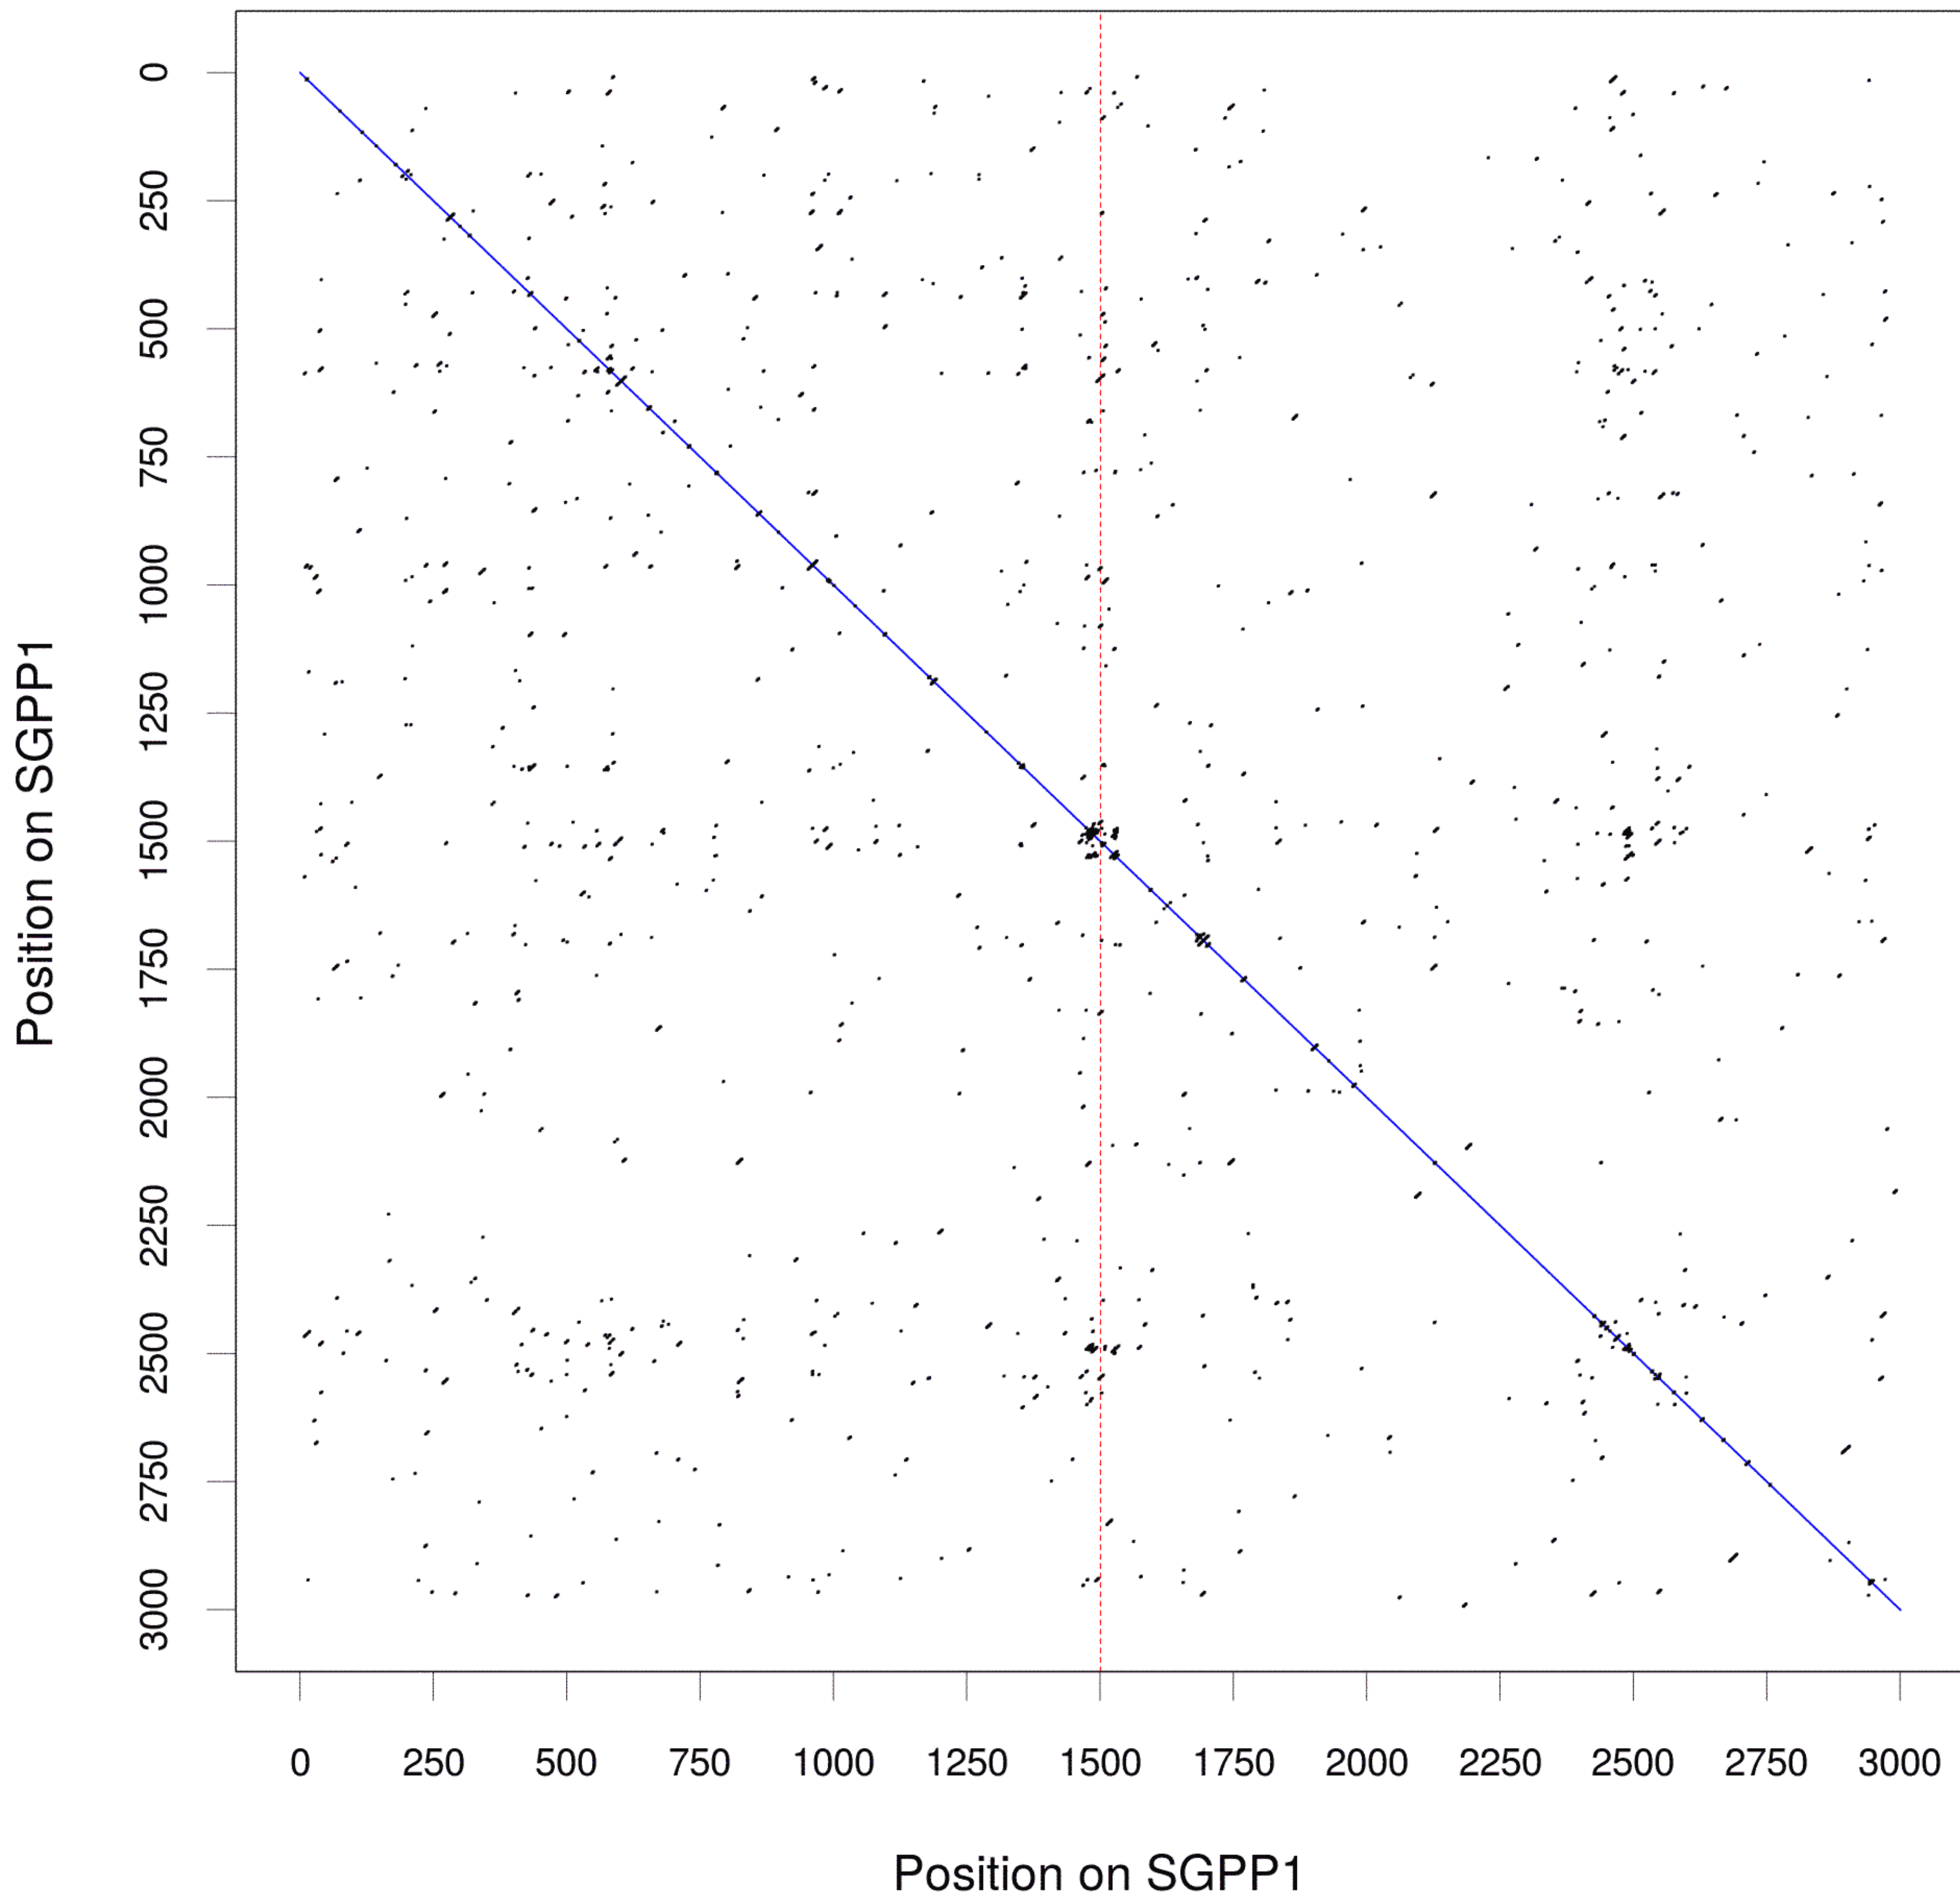

# SH3GLB2

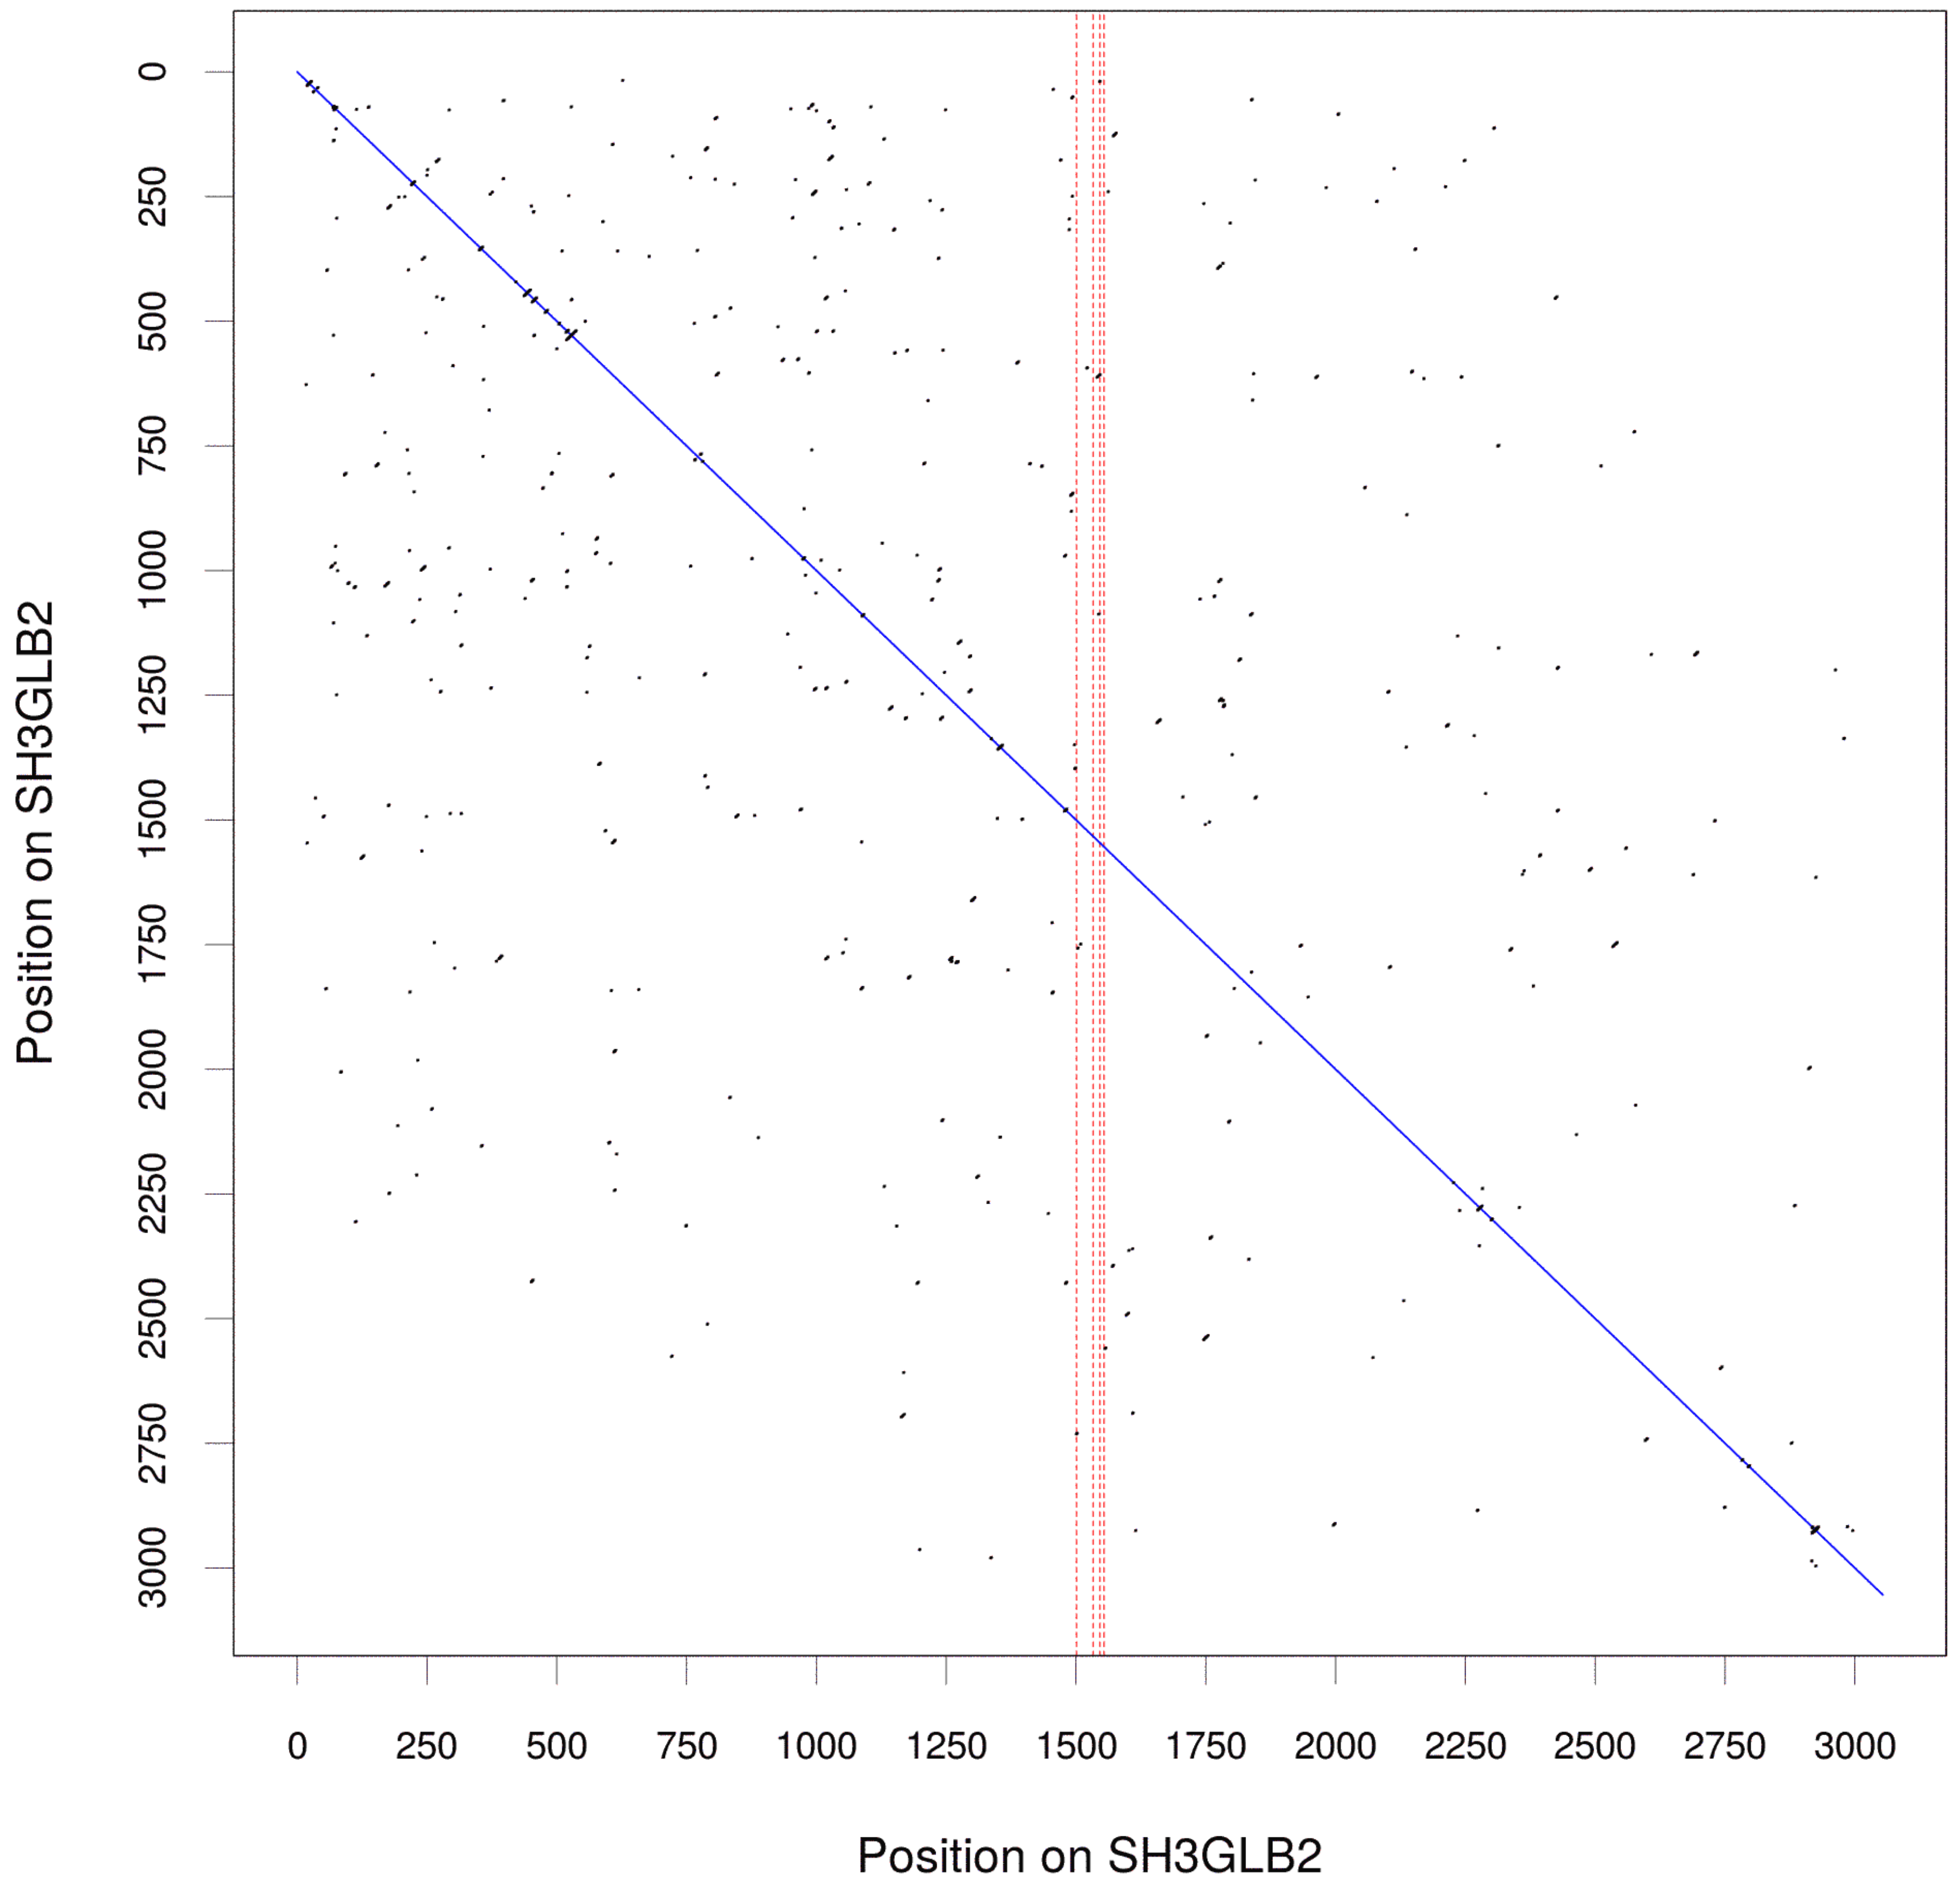

# SLC1A1

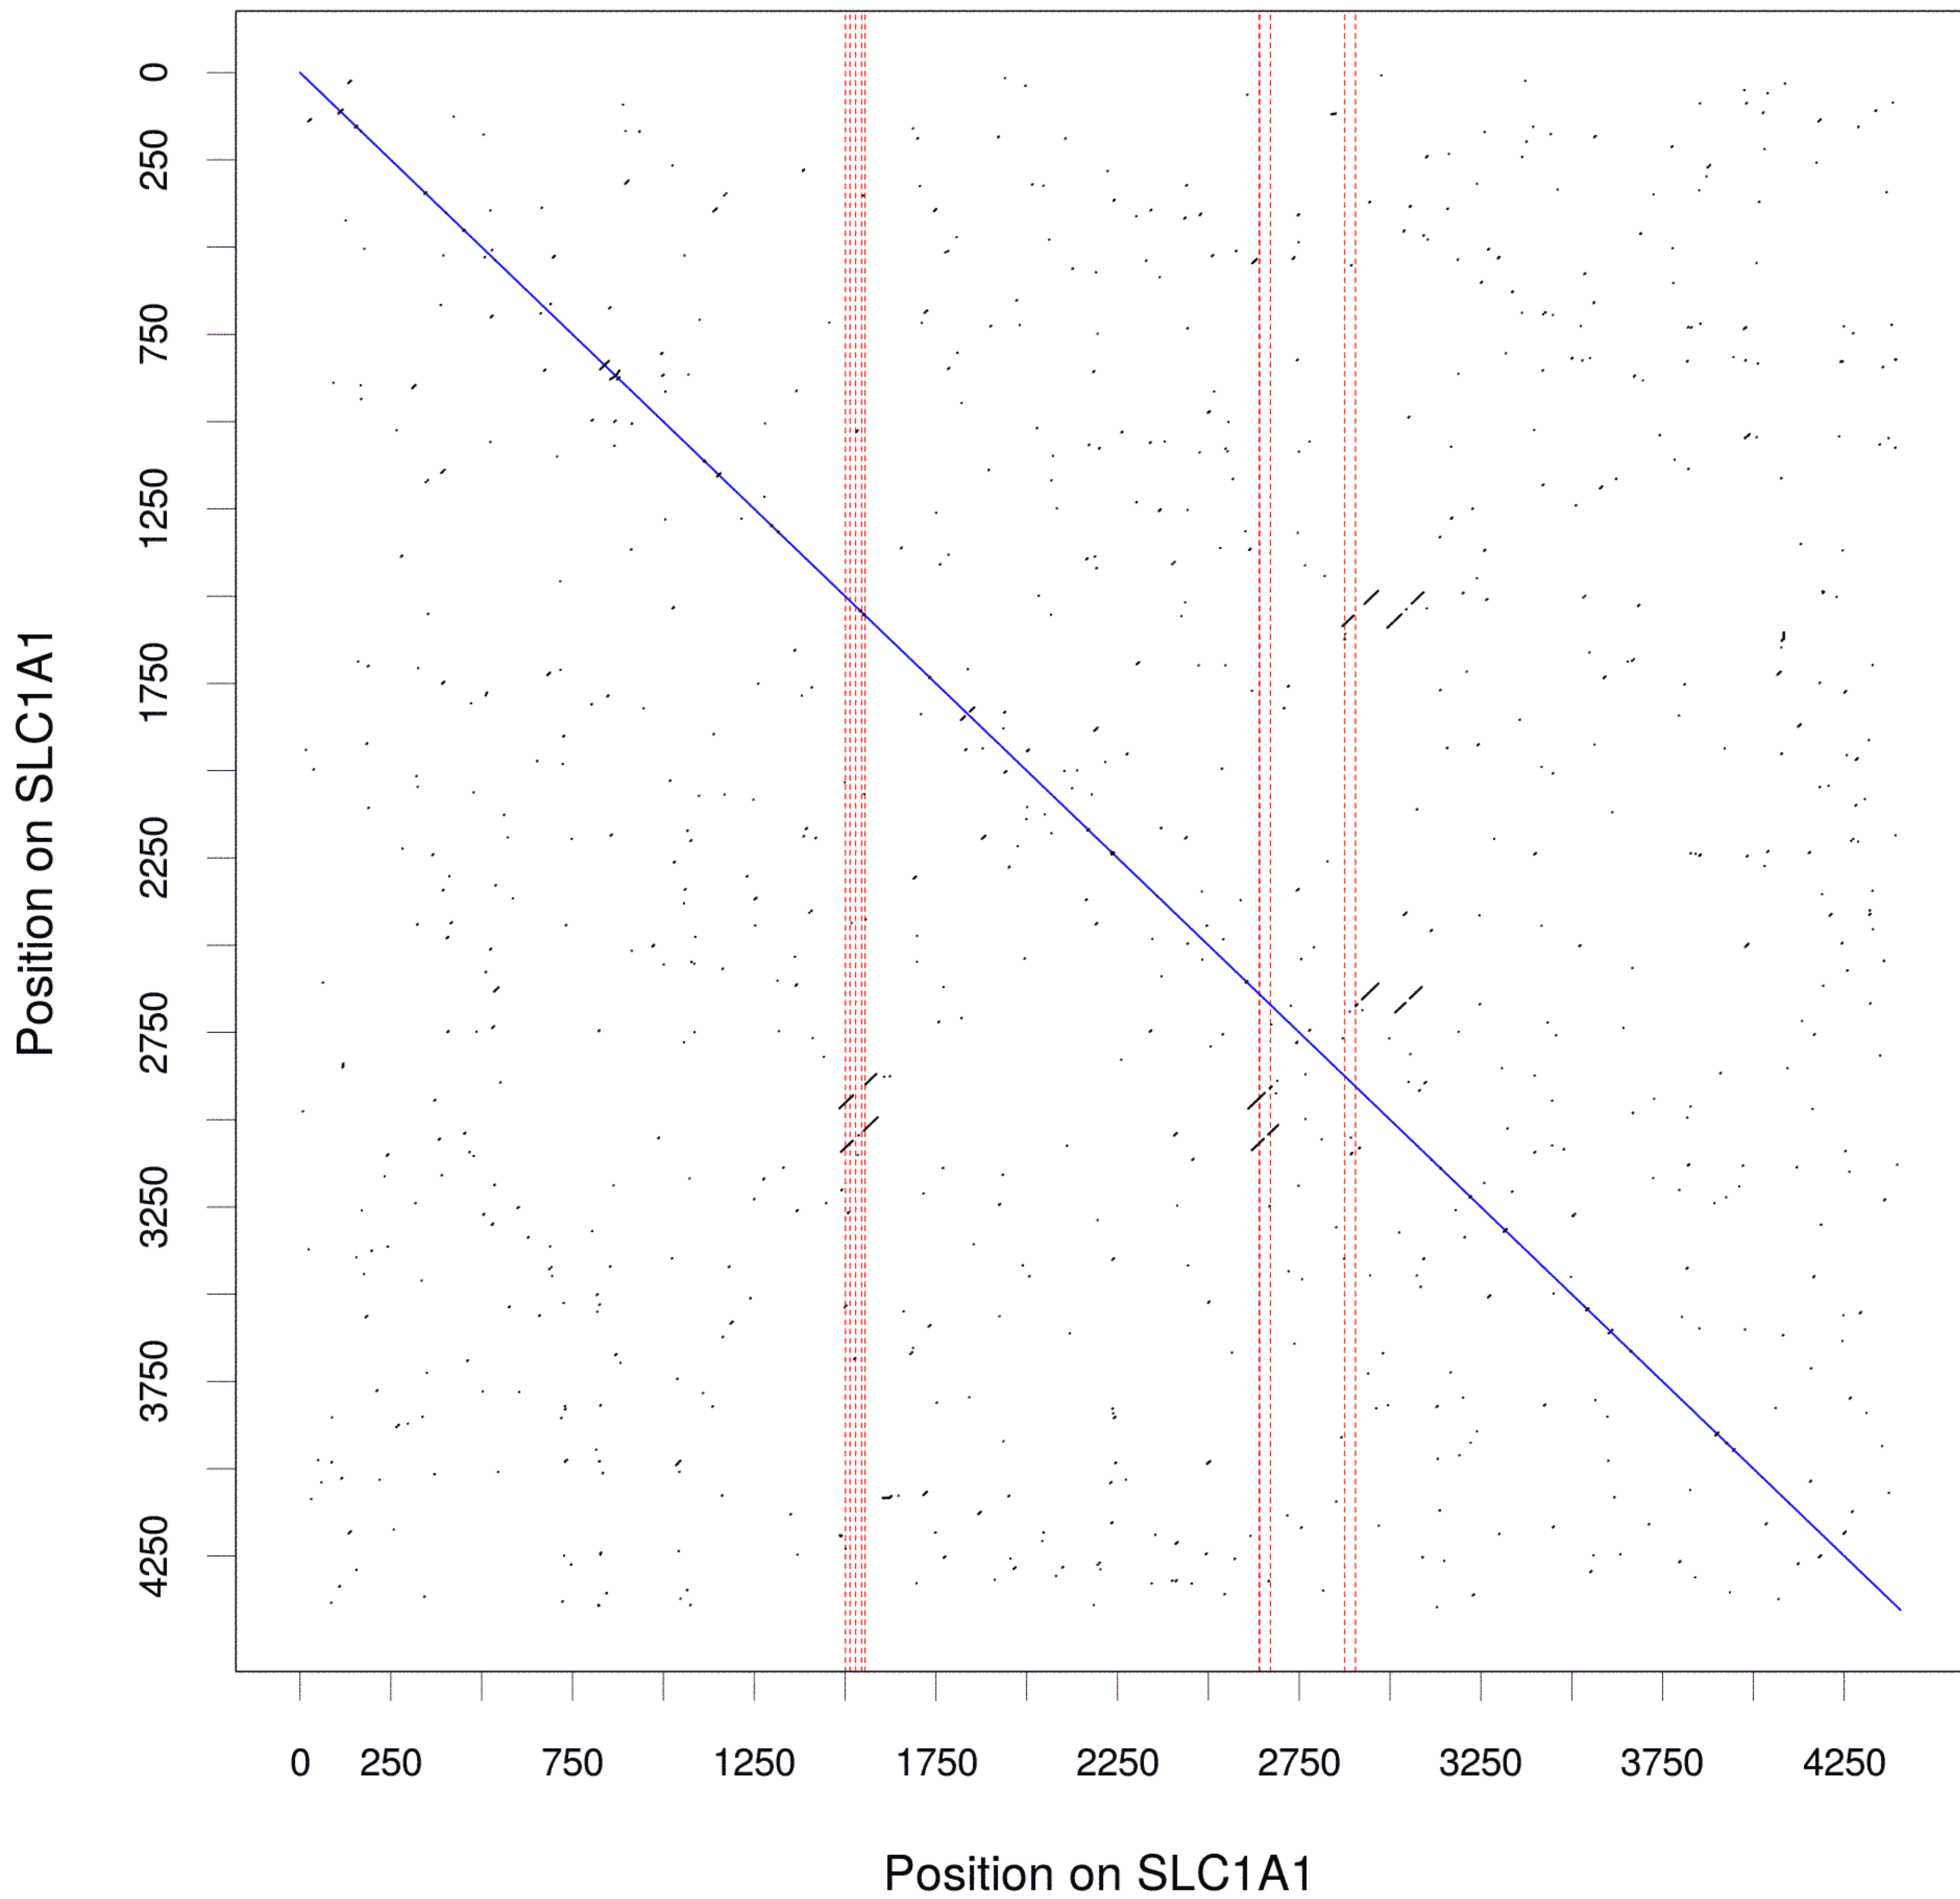

# SLC5A9

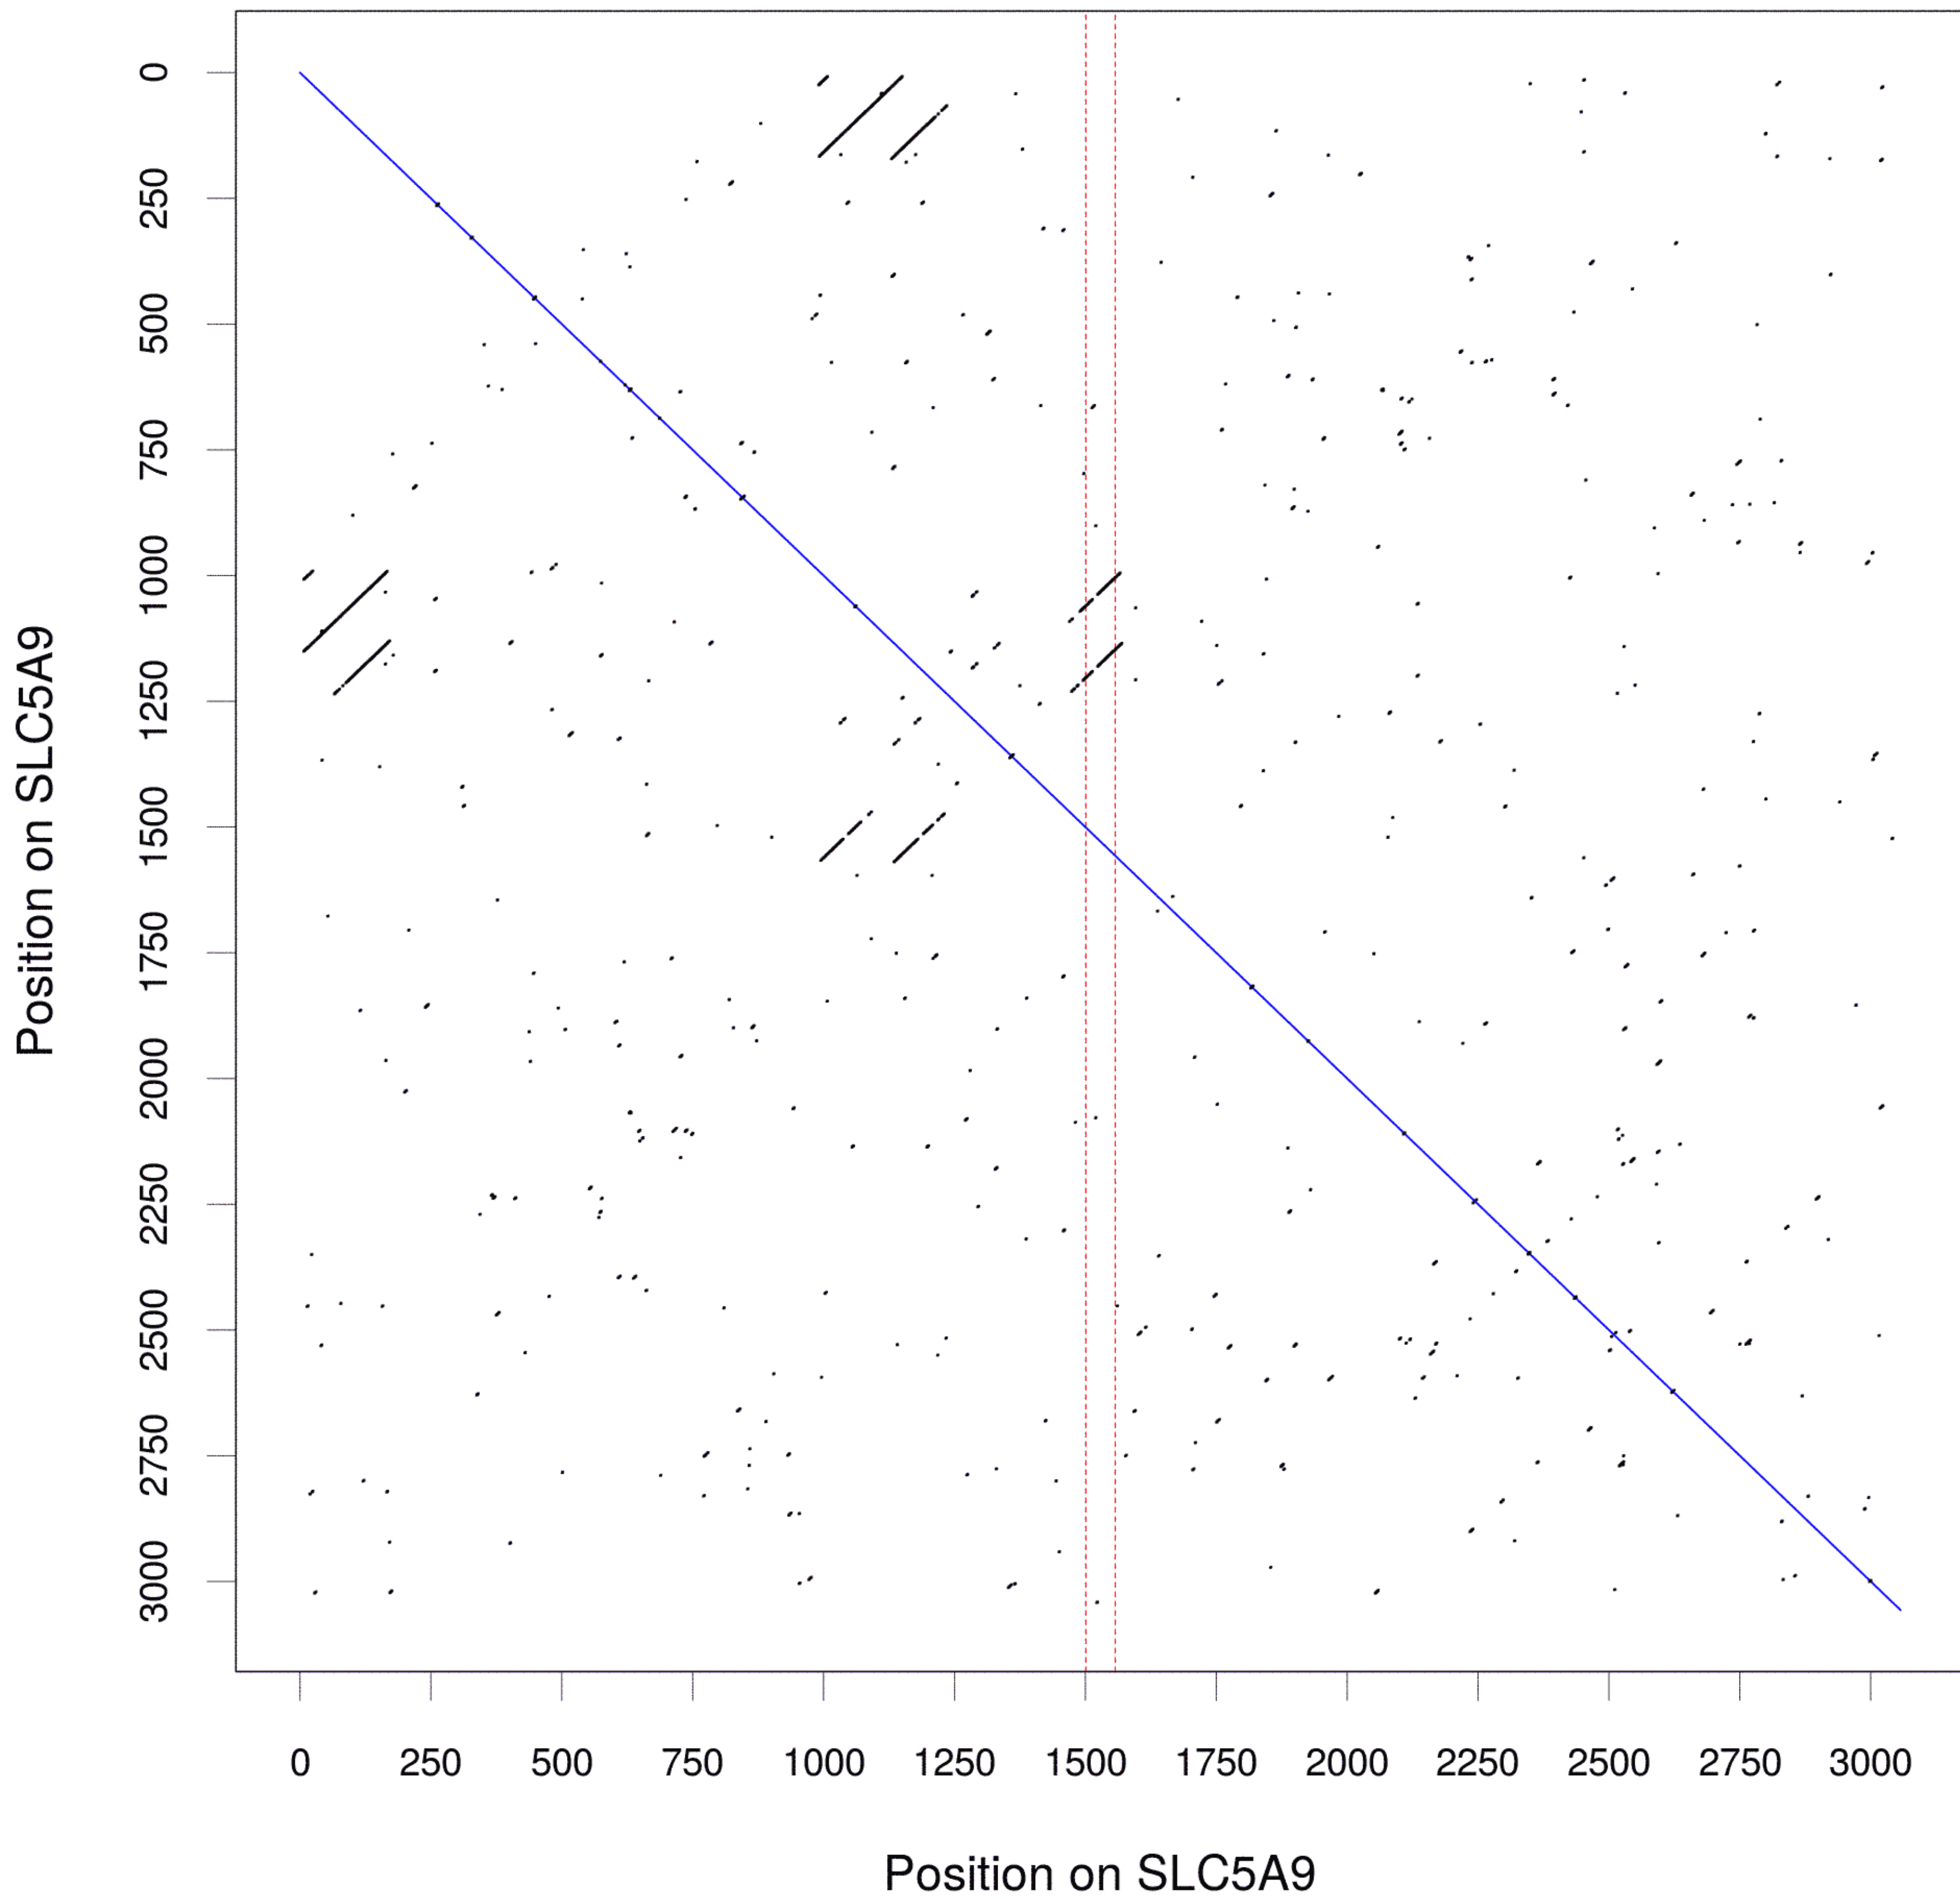

# SLC8B1

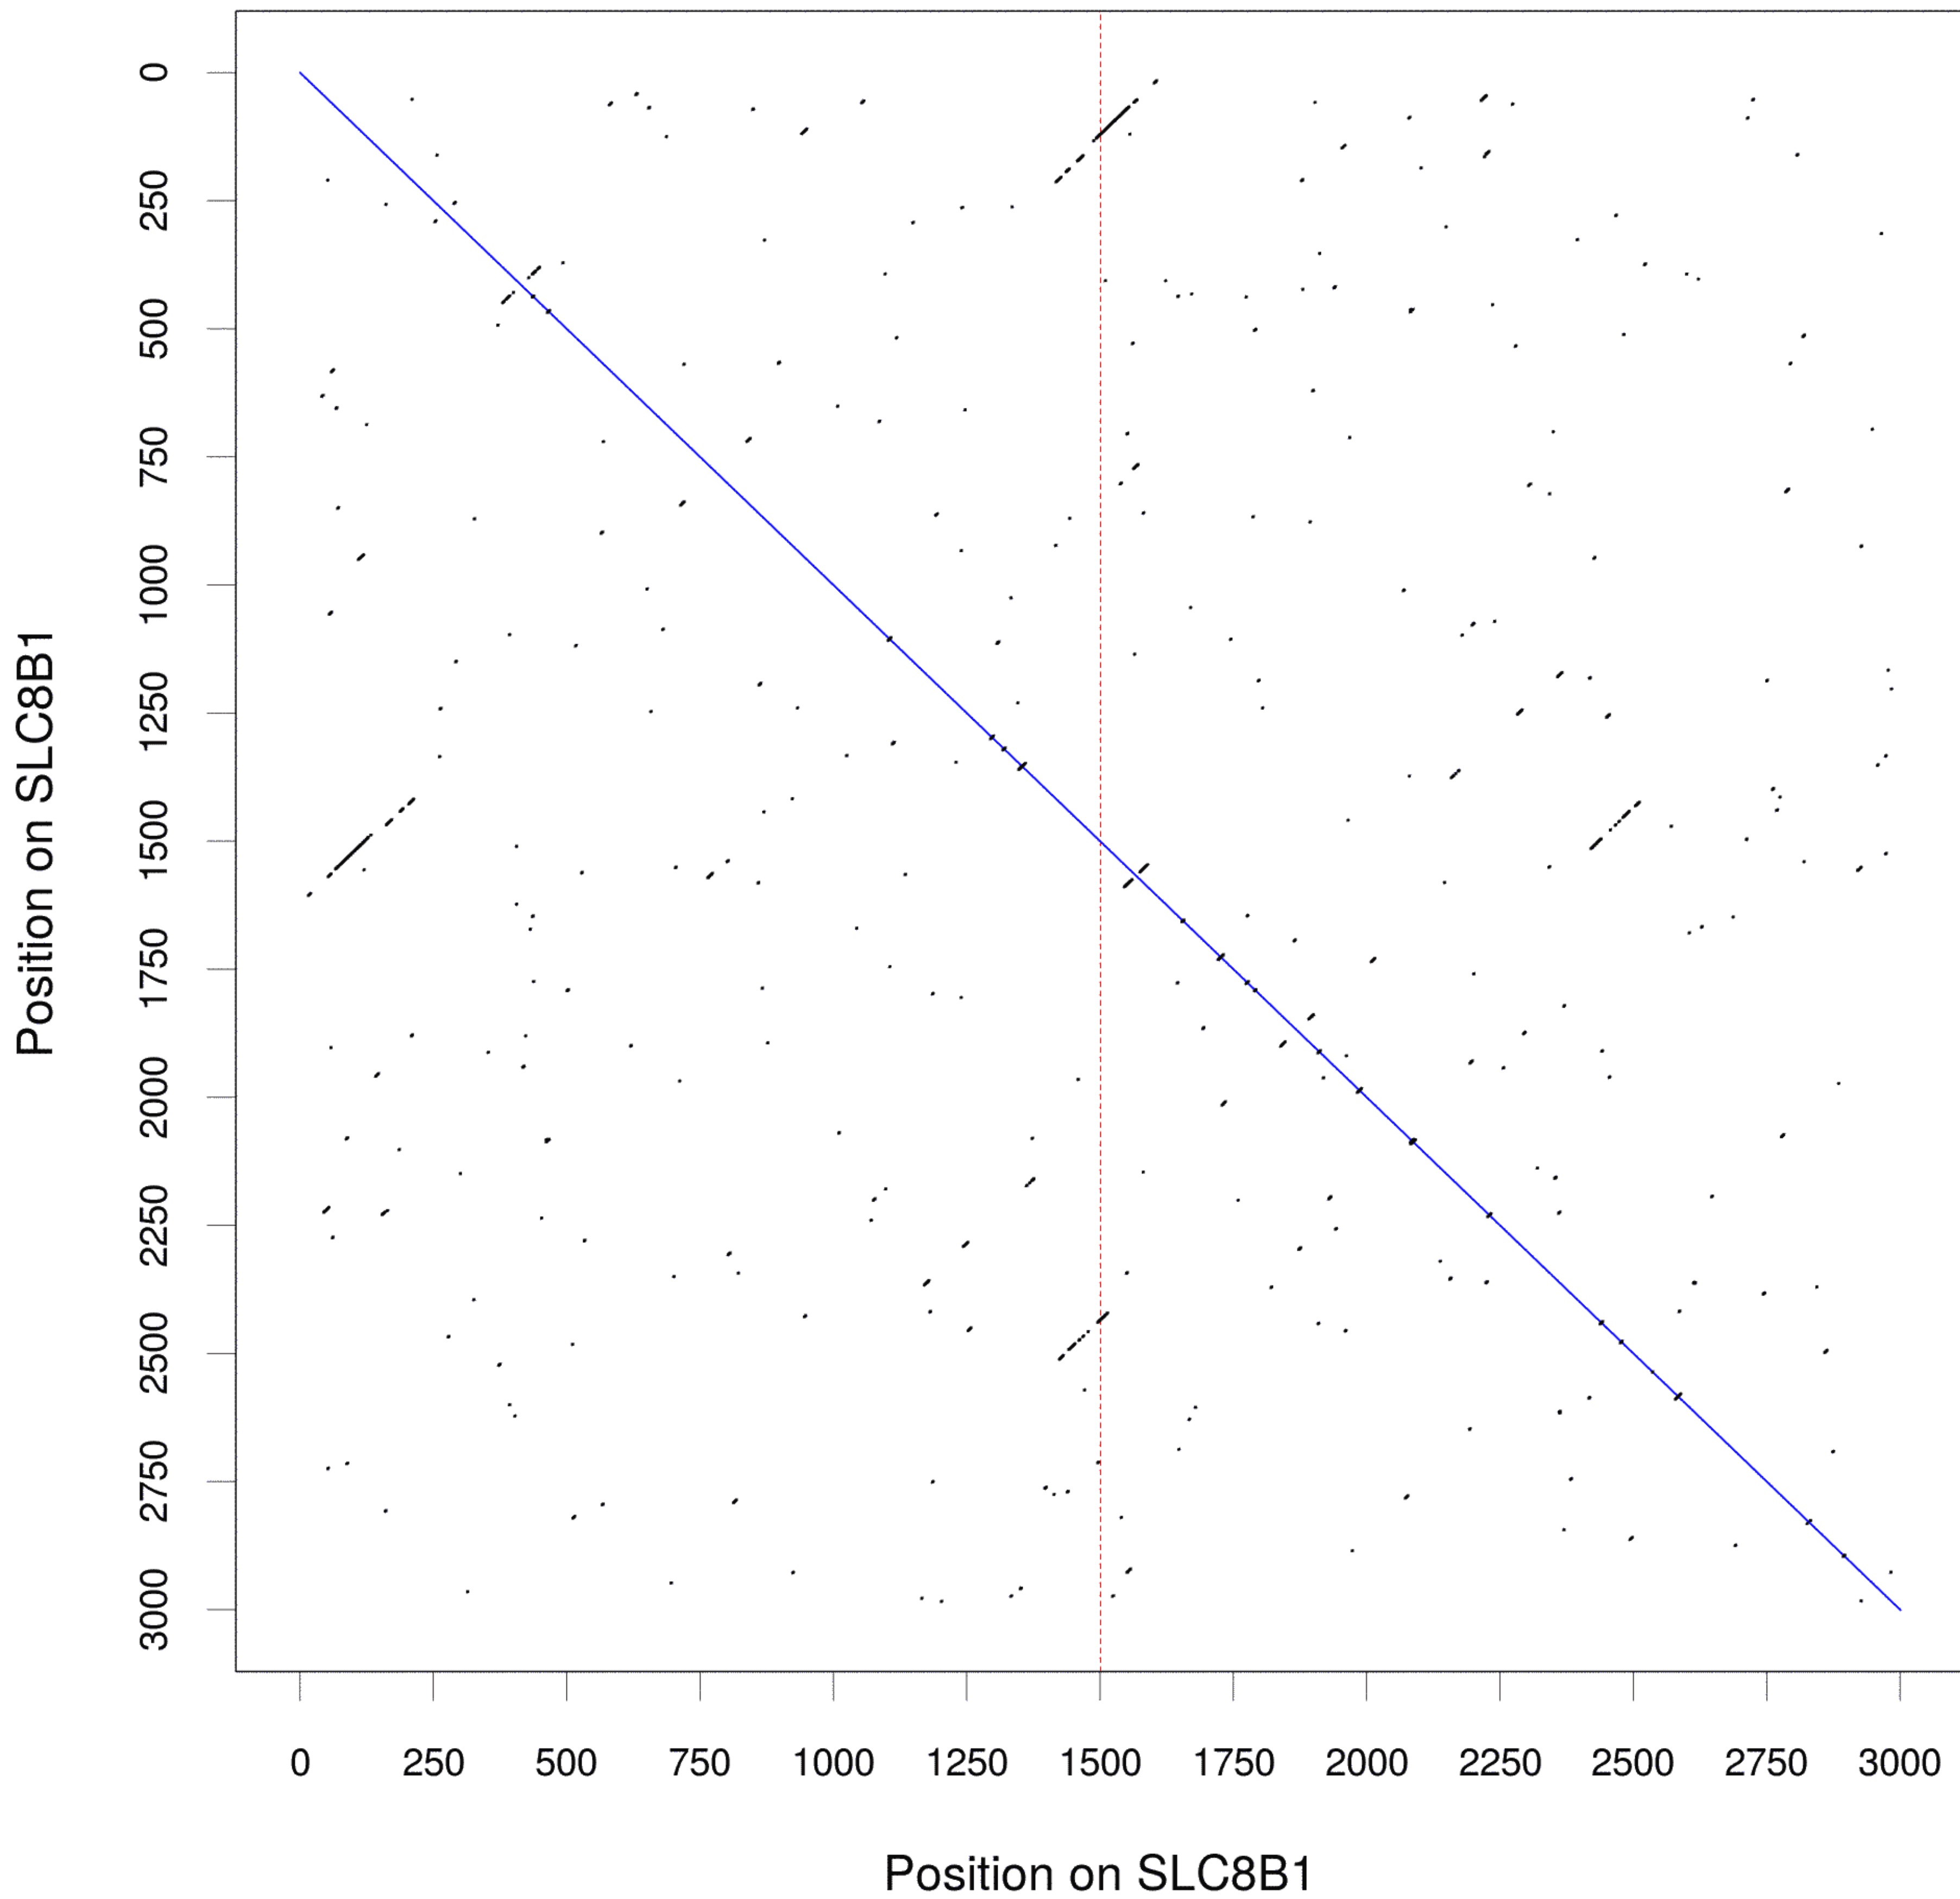

# SLC18B1

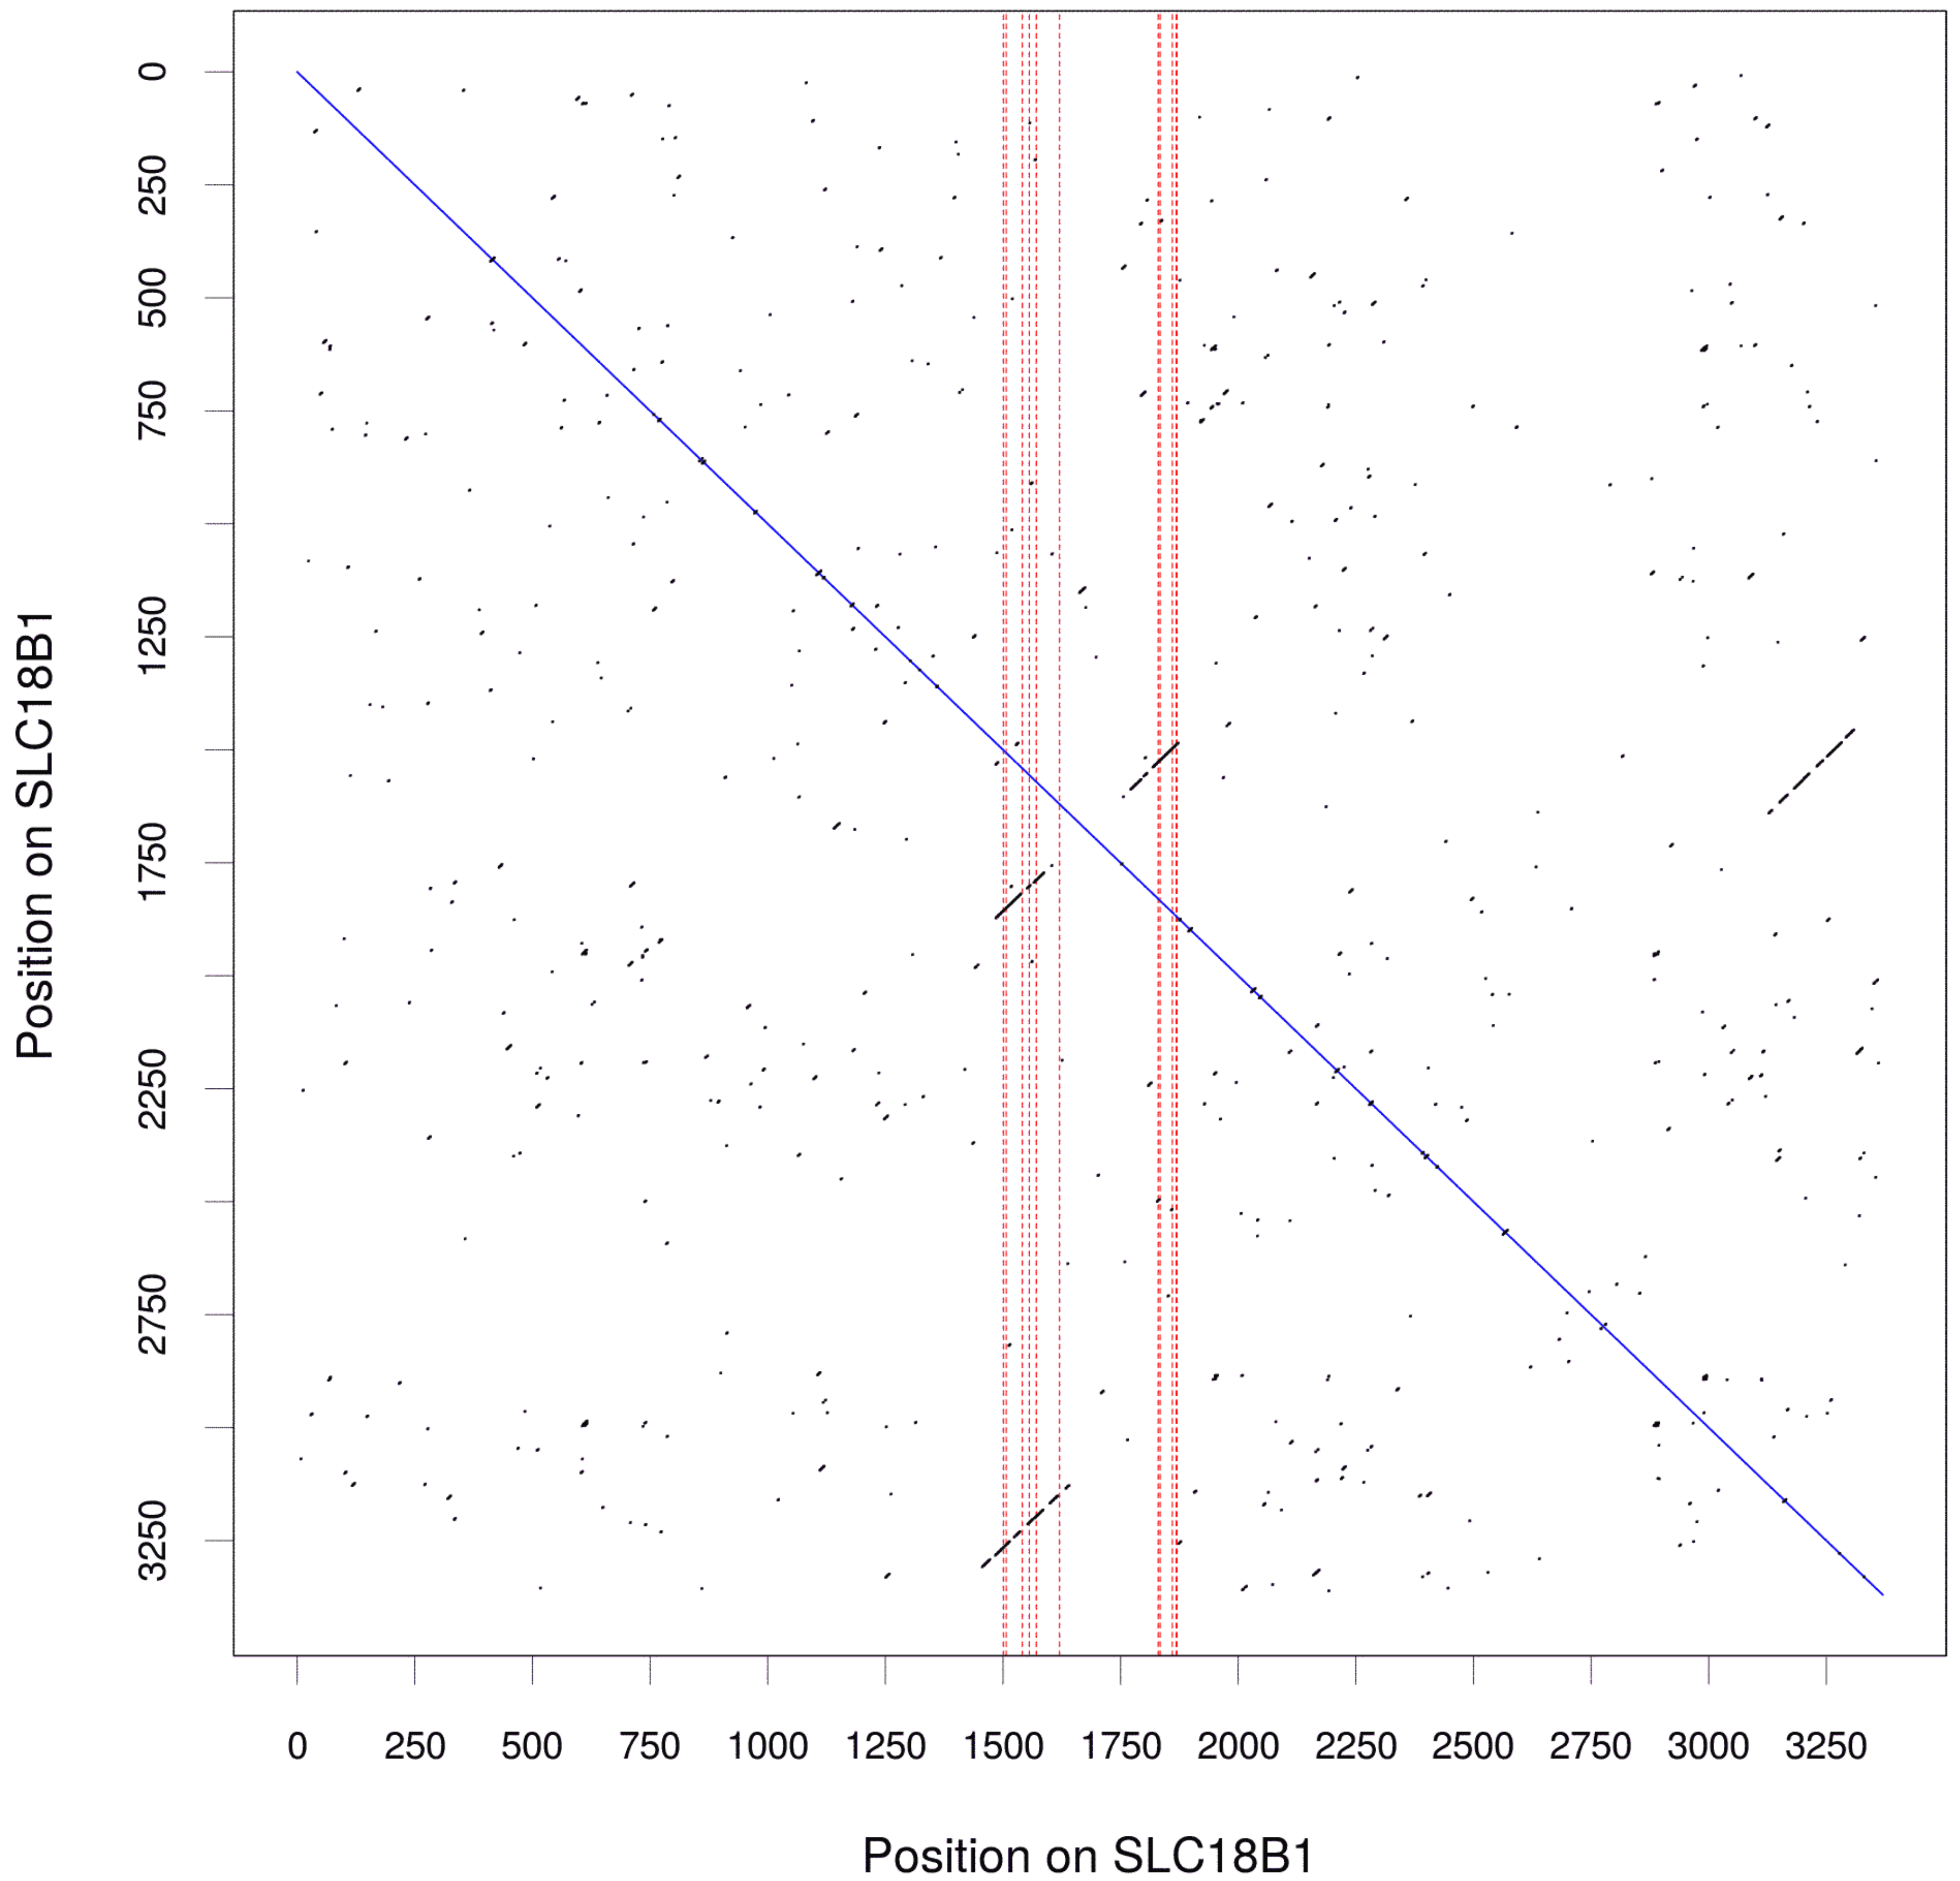

# SLC20A1

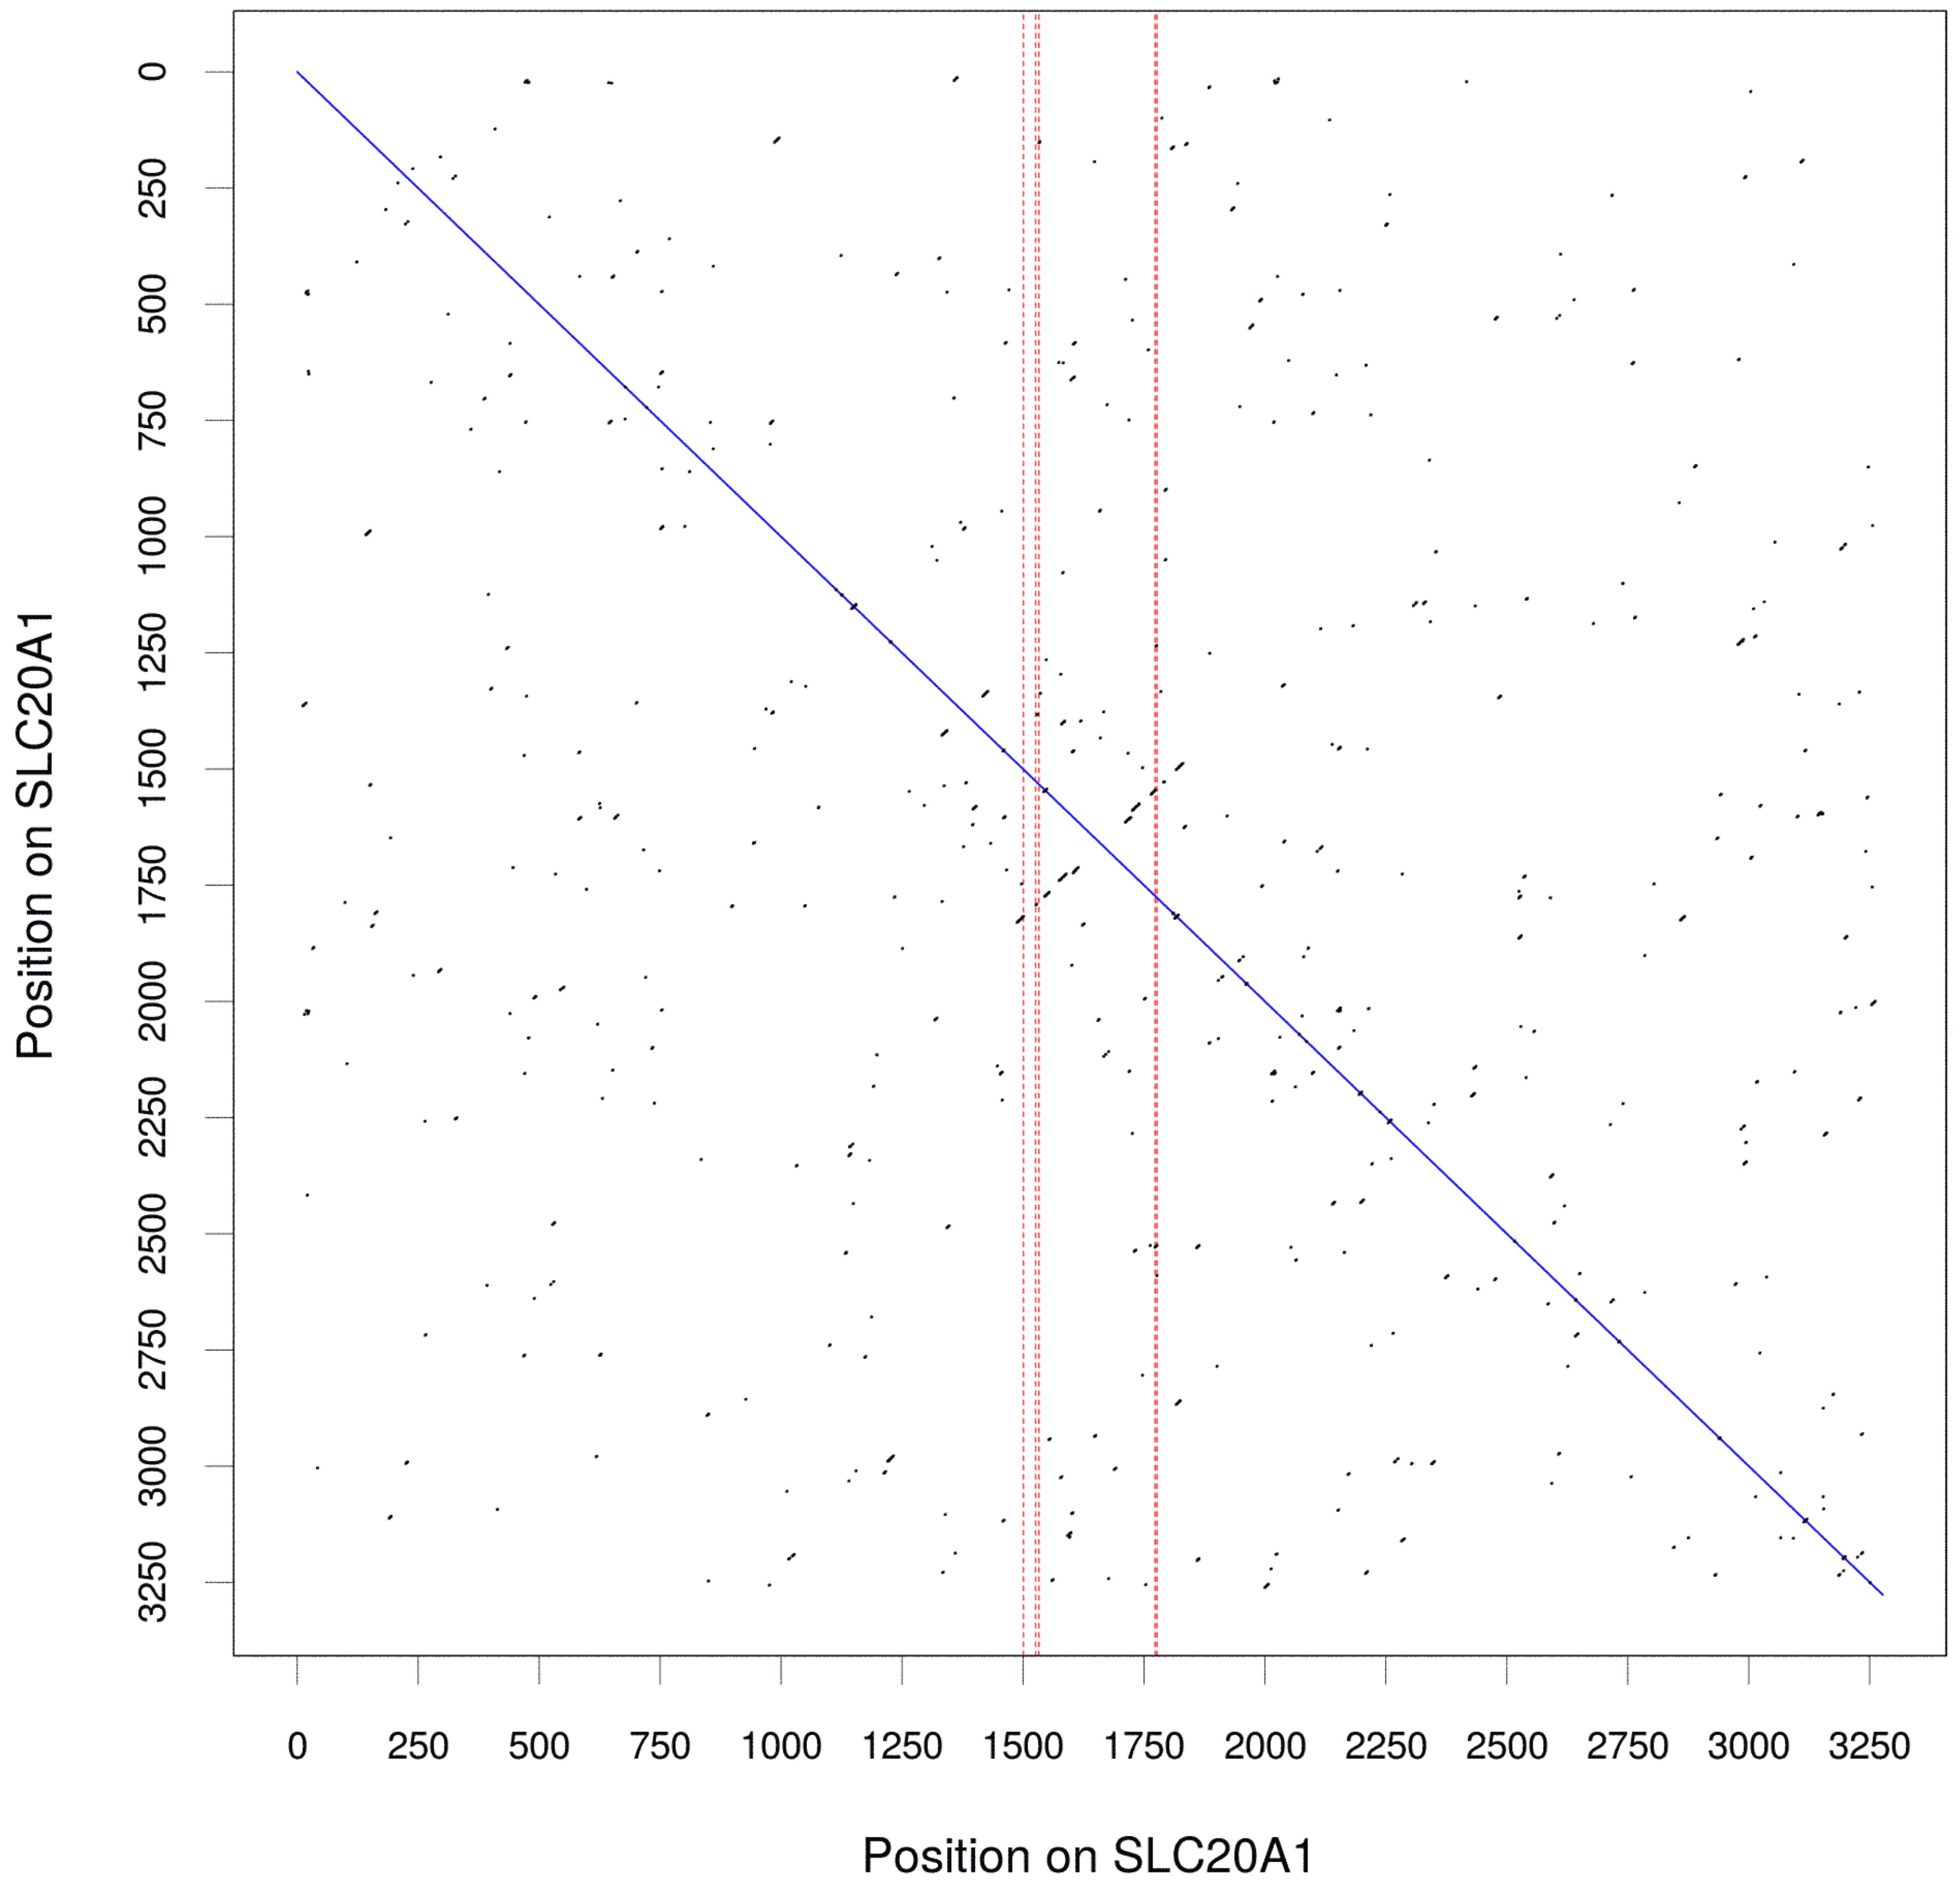

# SLC34A2

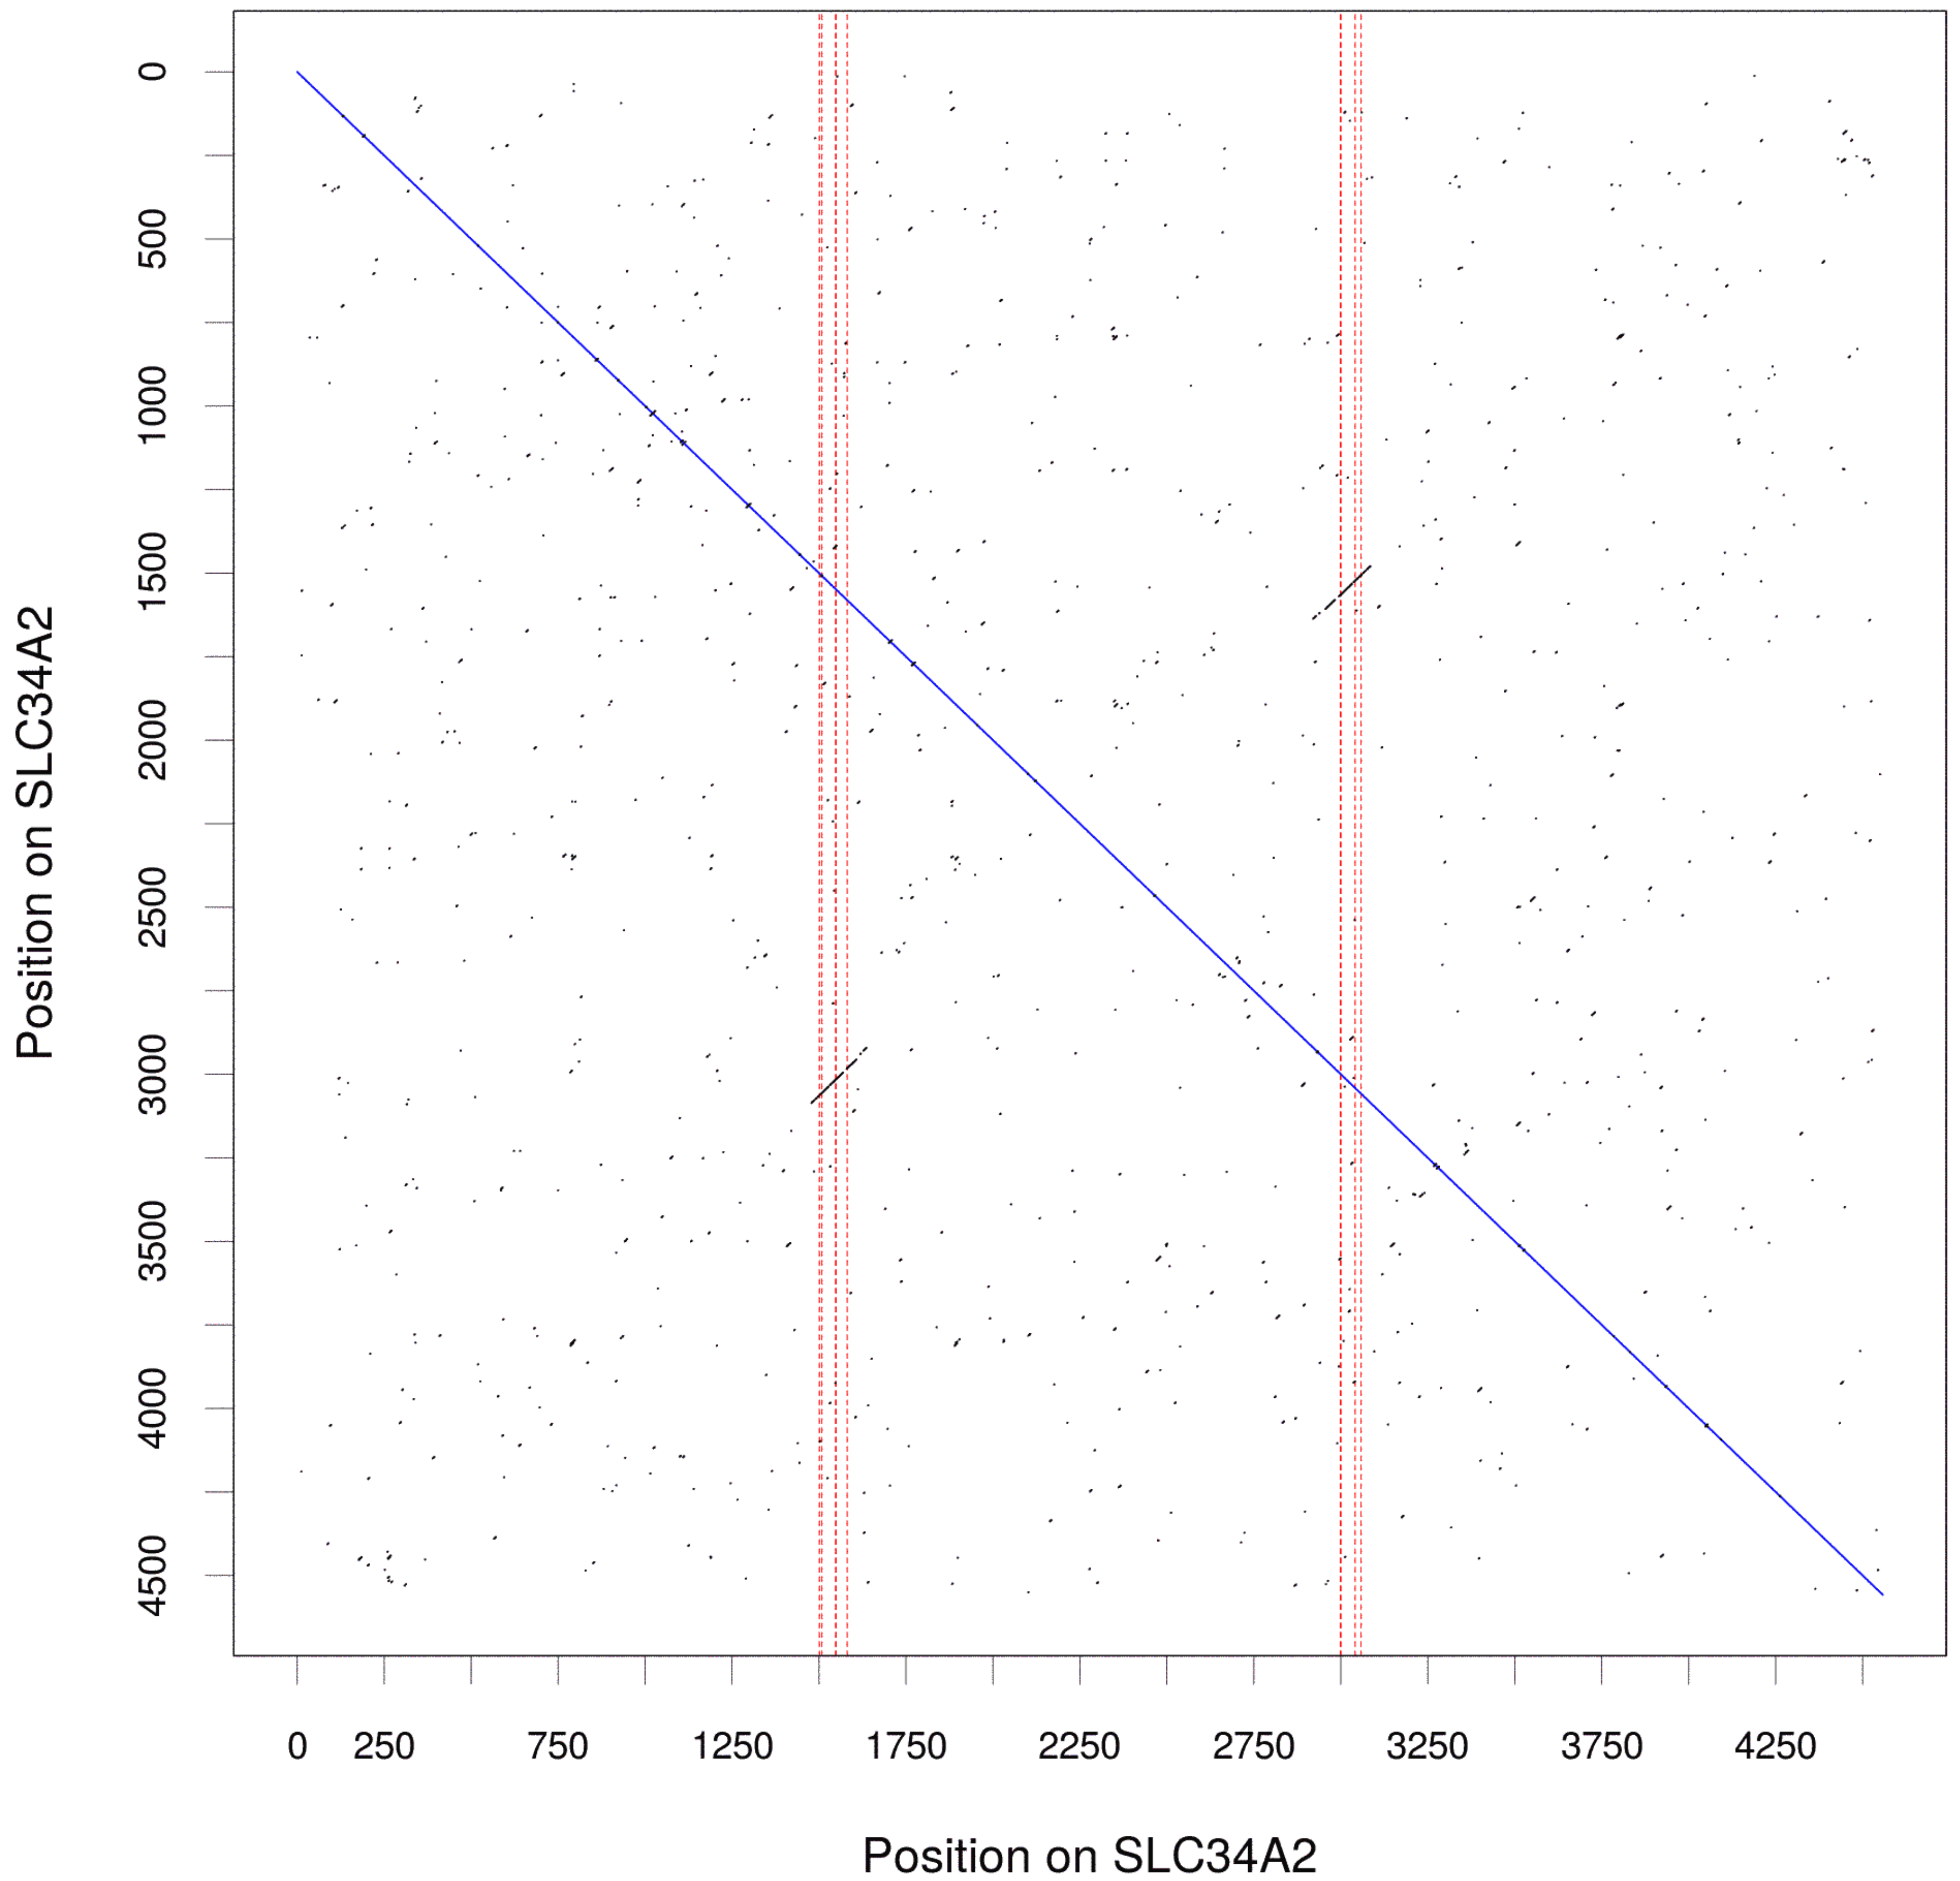



# SLC37A1

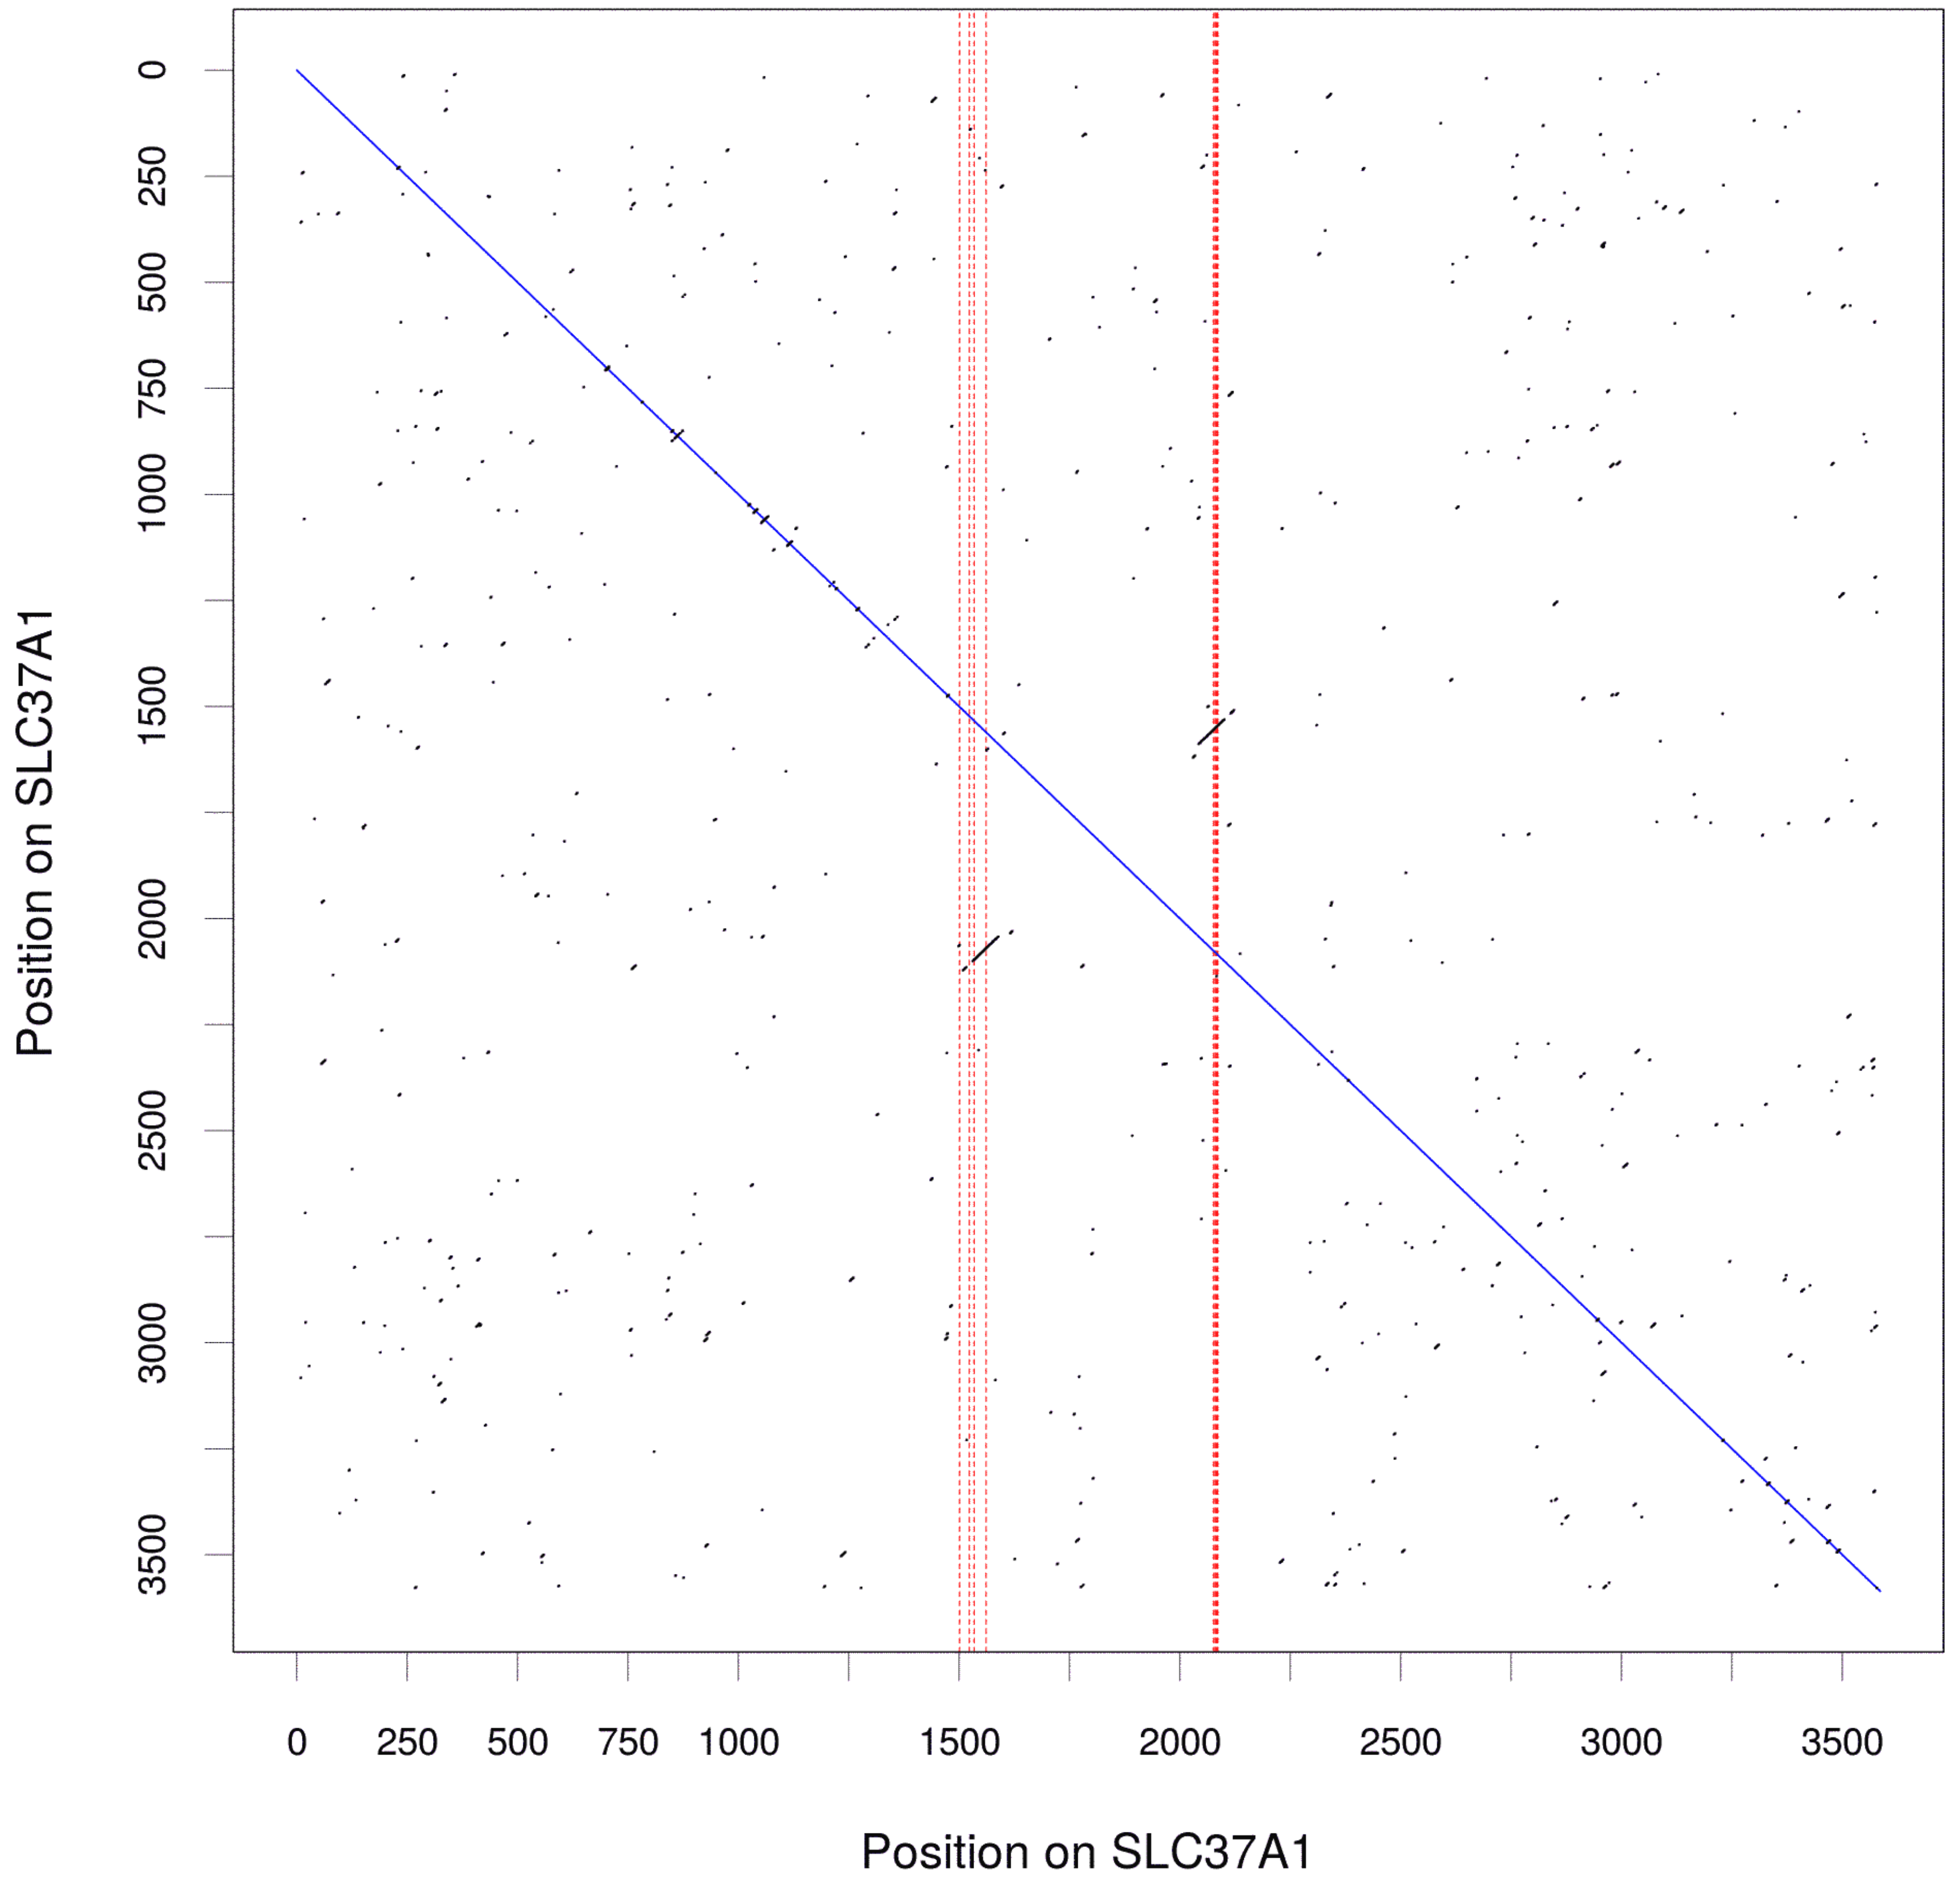

# SLC44A3

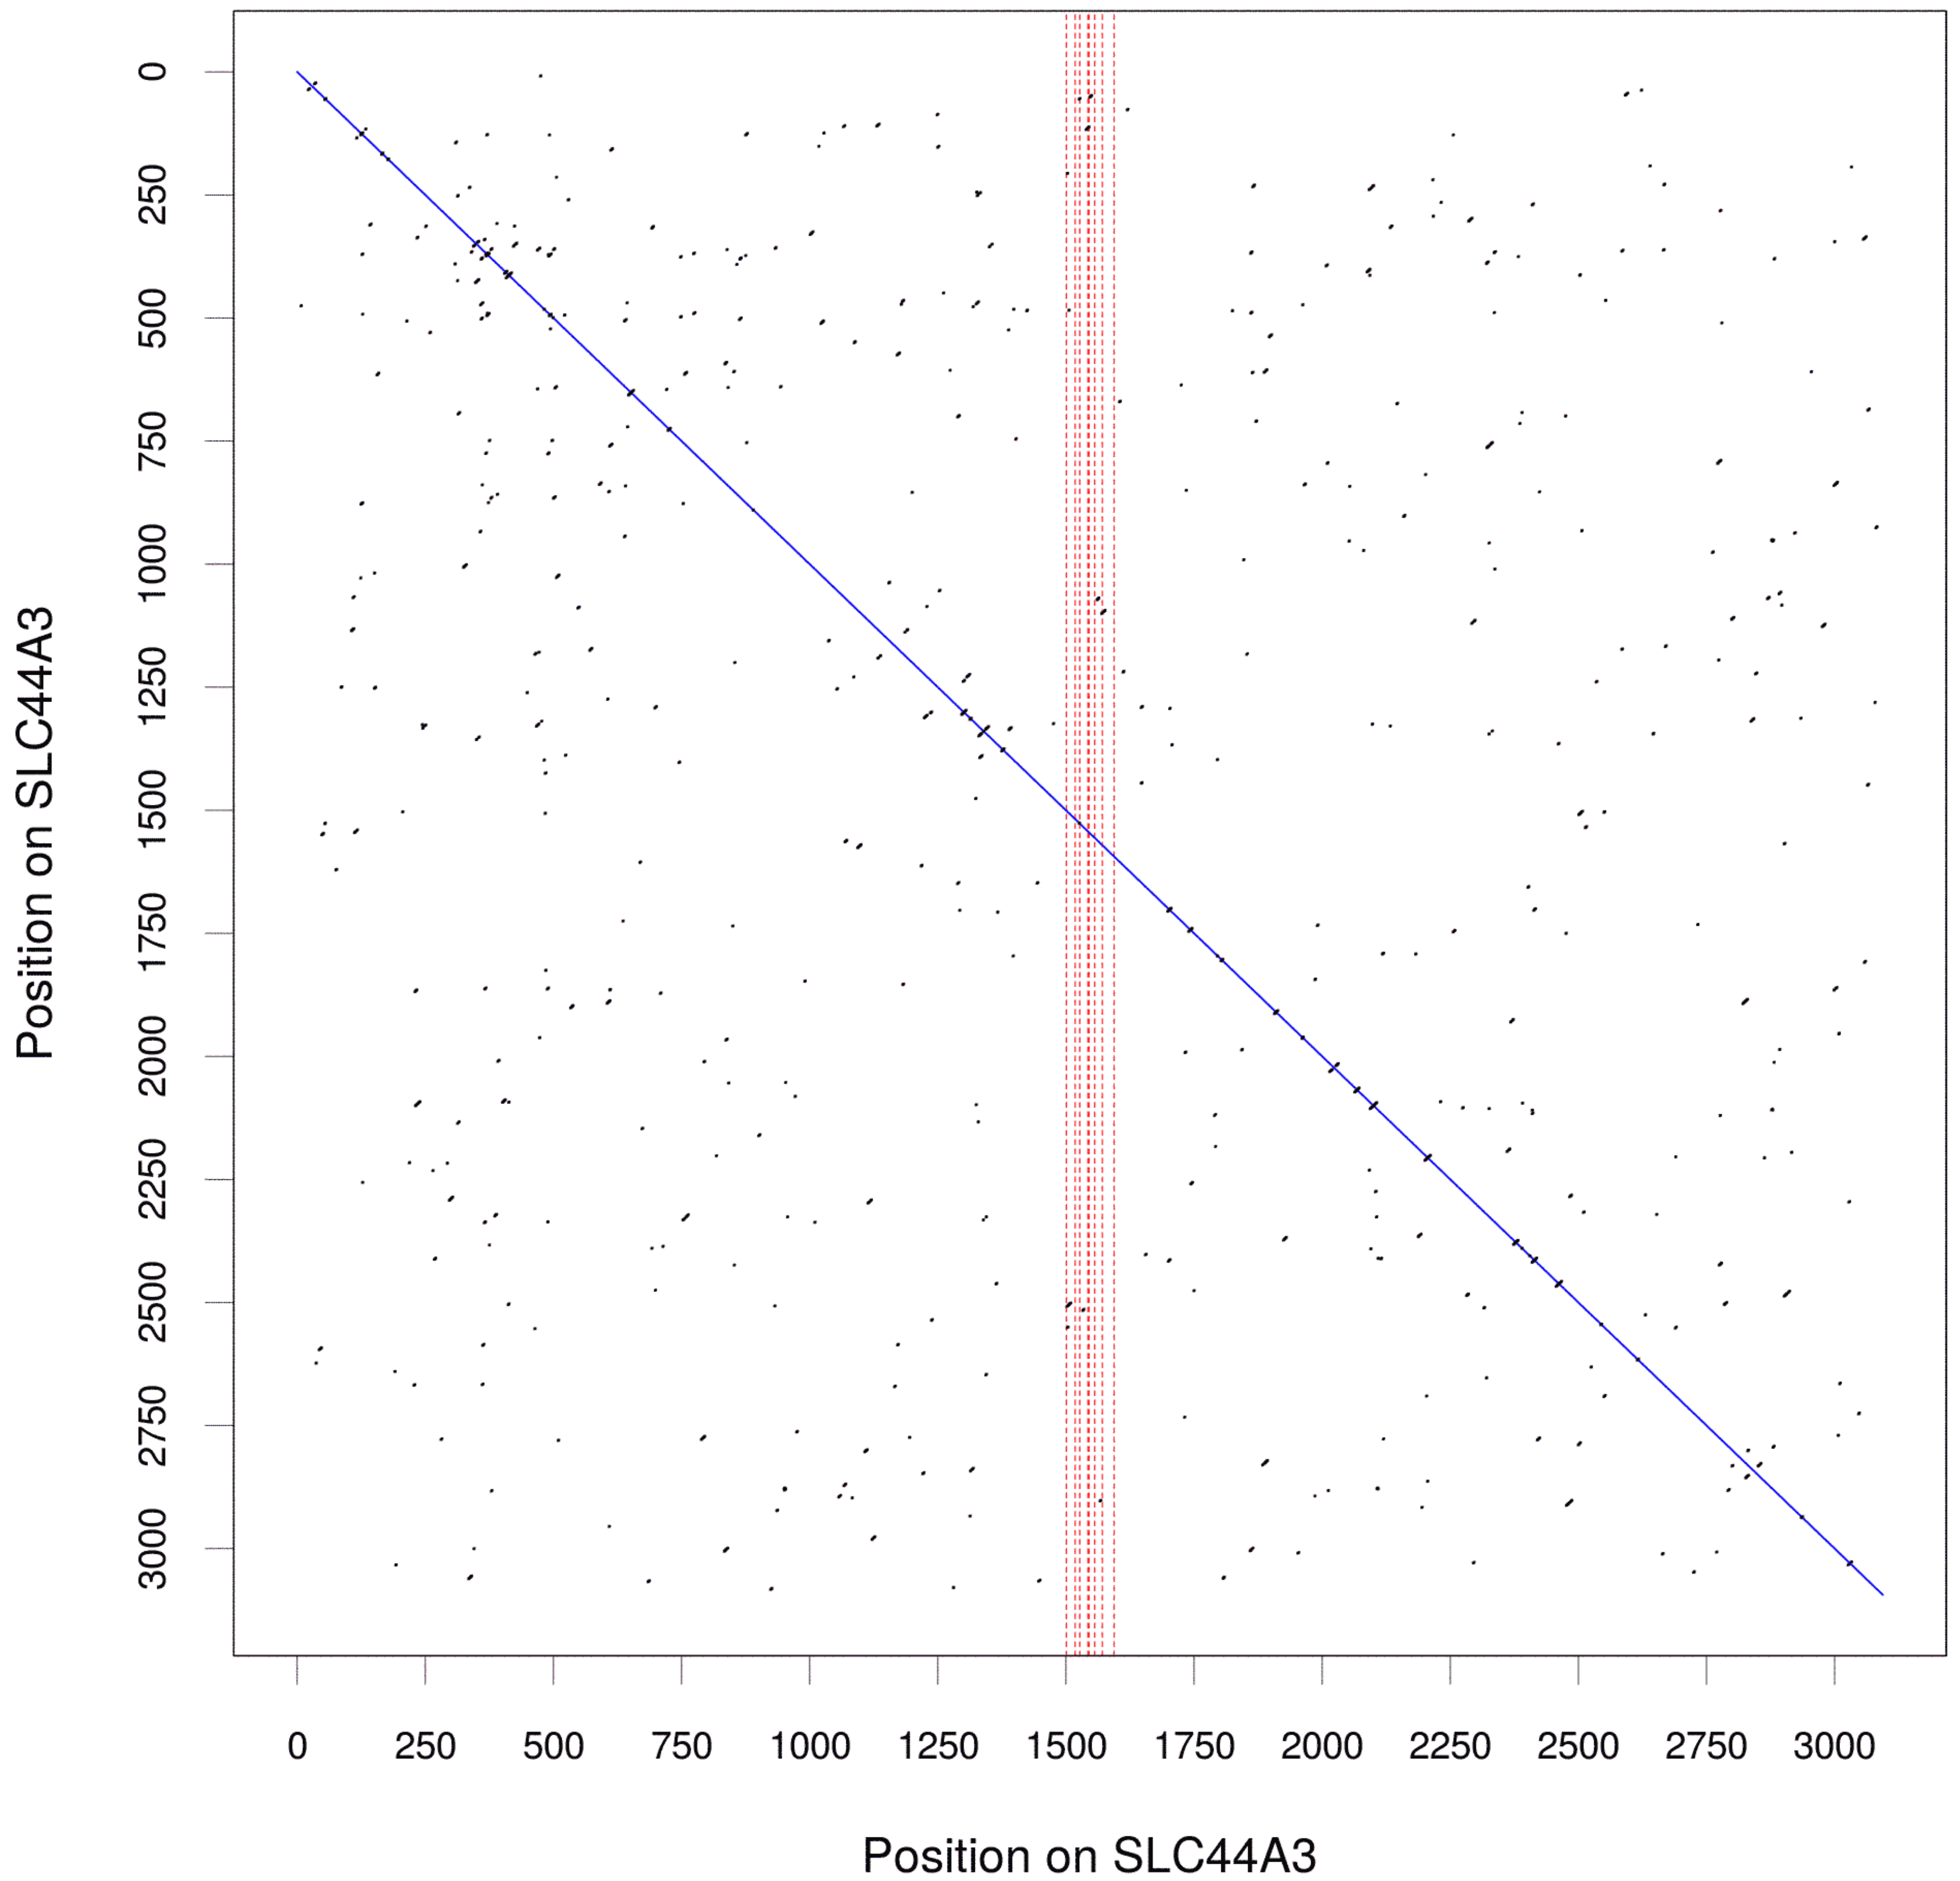

# SMIM19

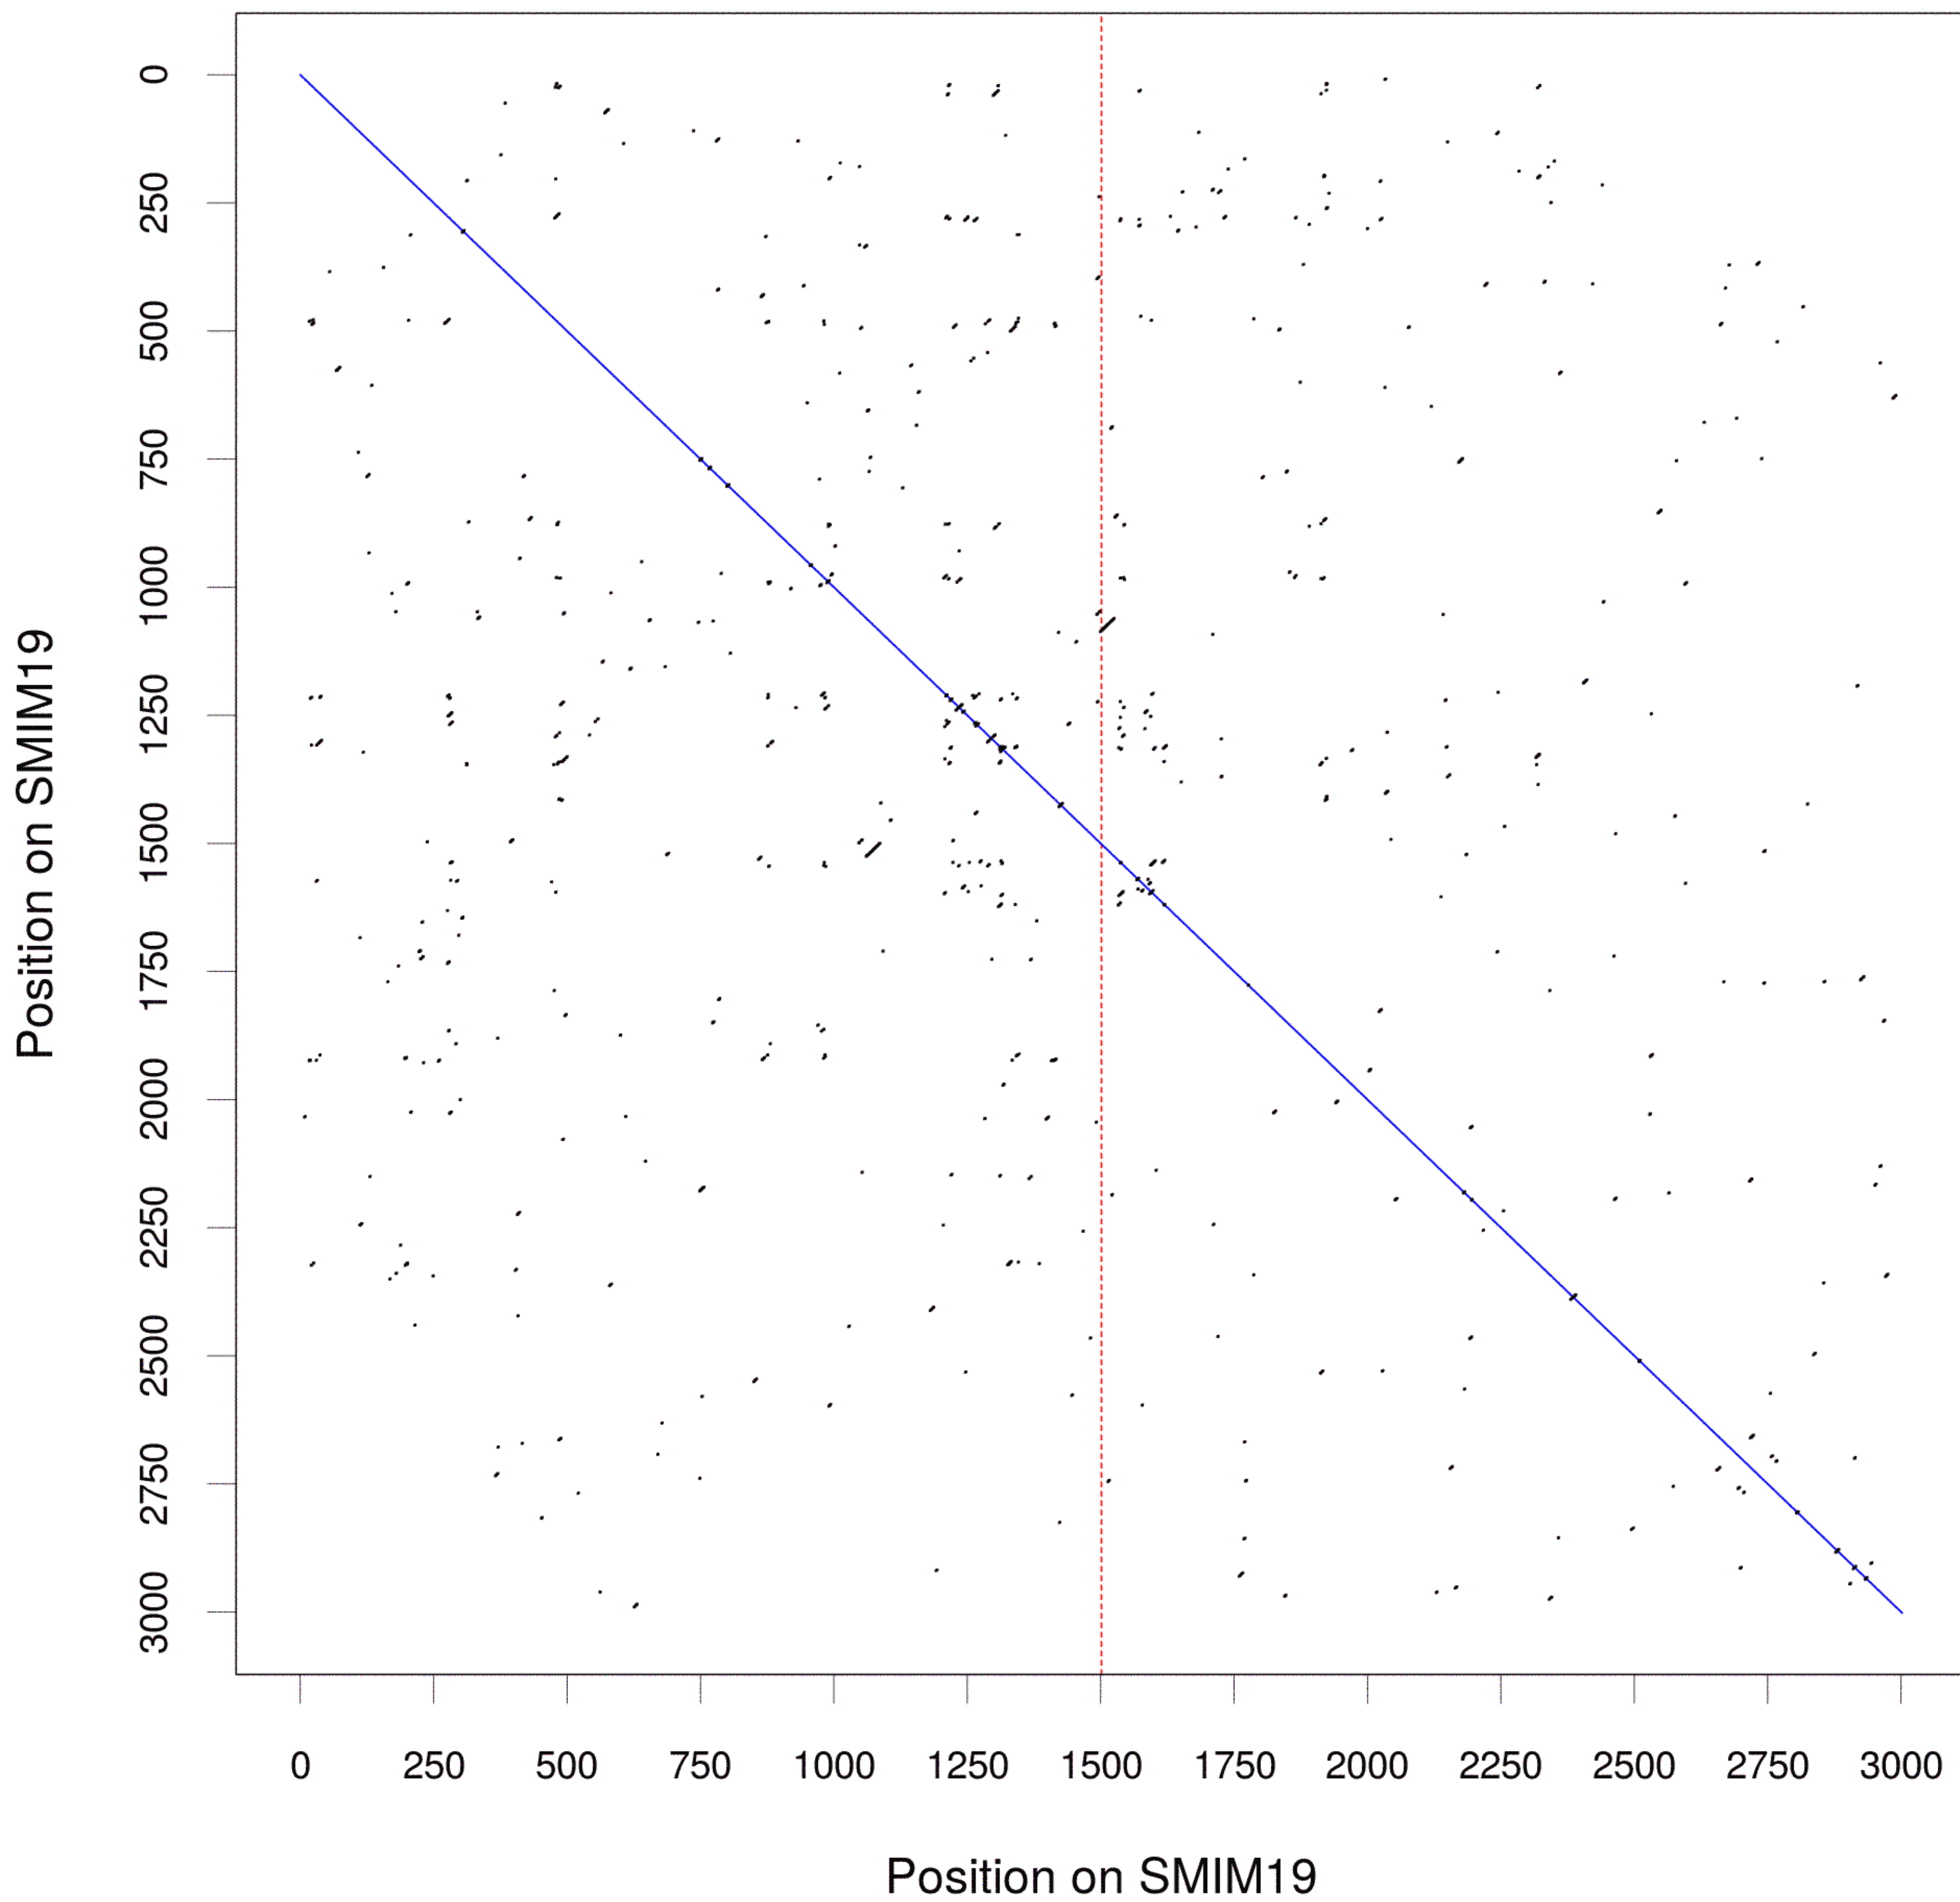

# SNRNP40

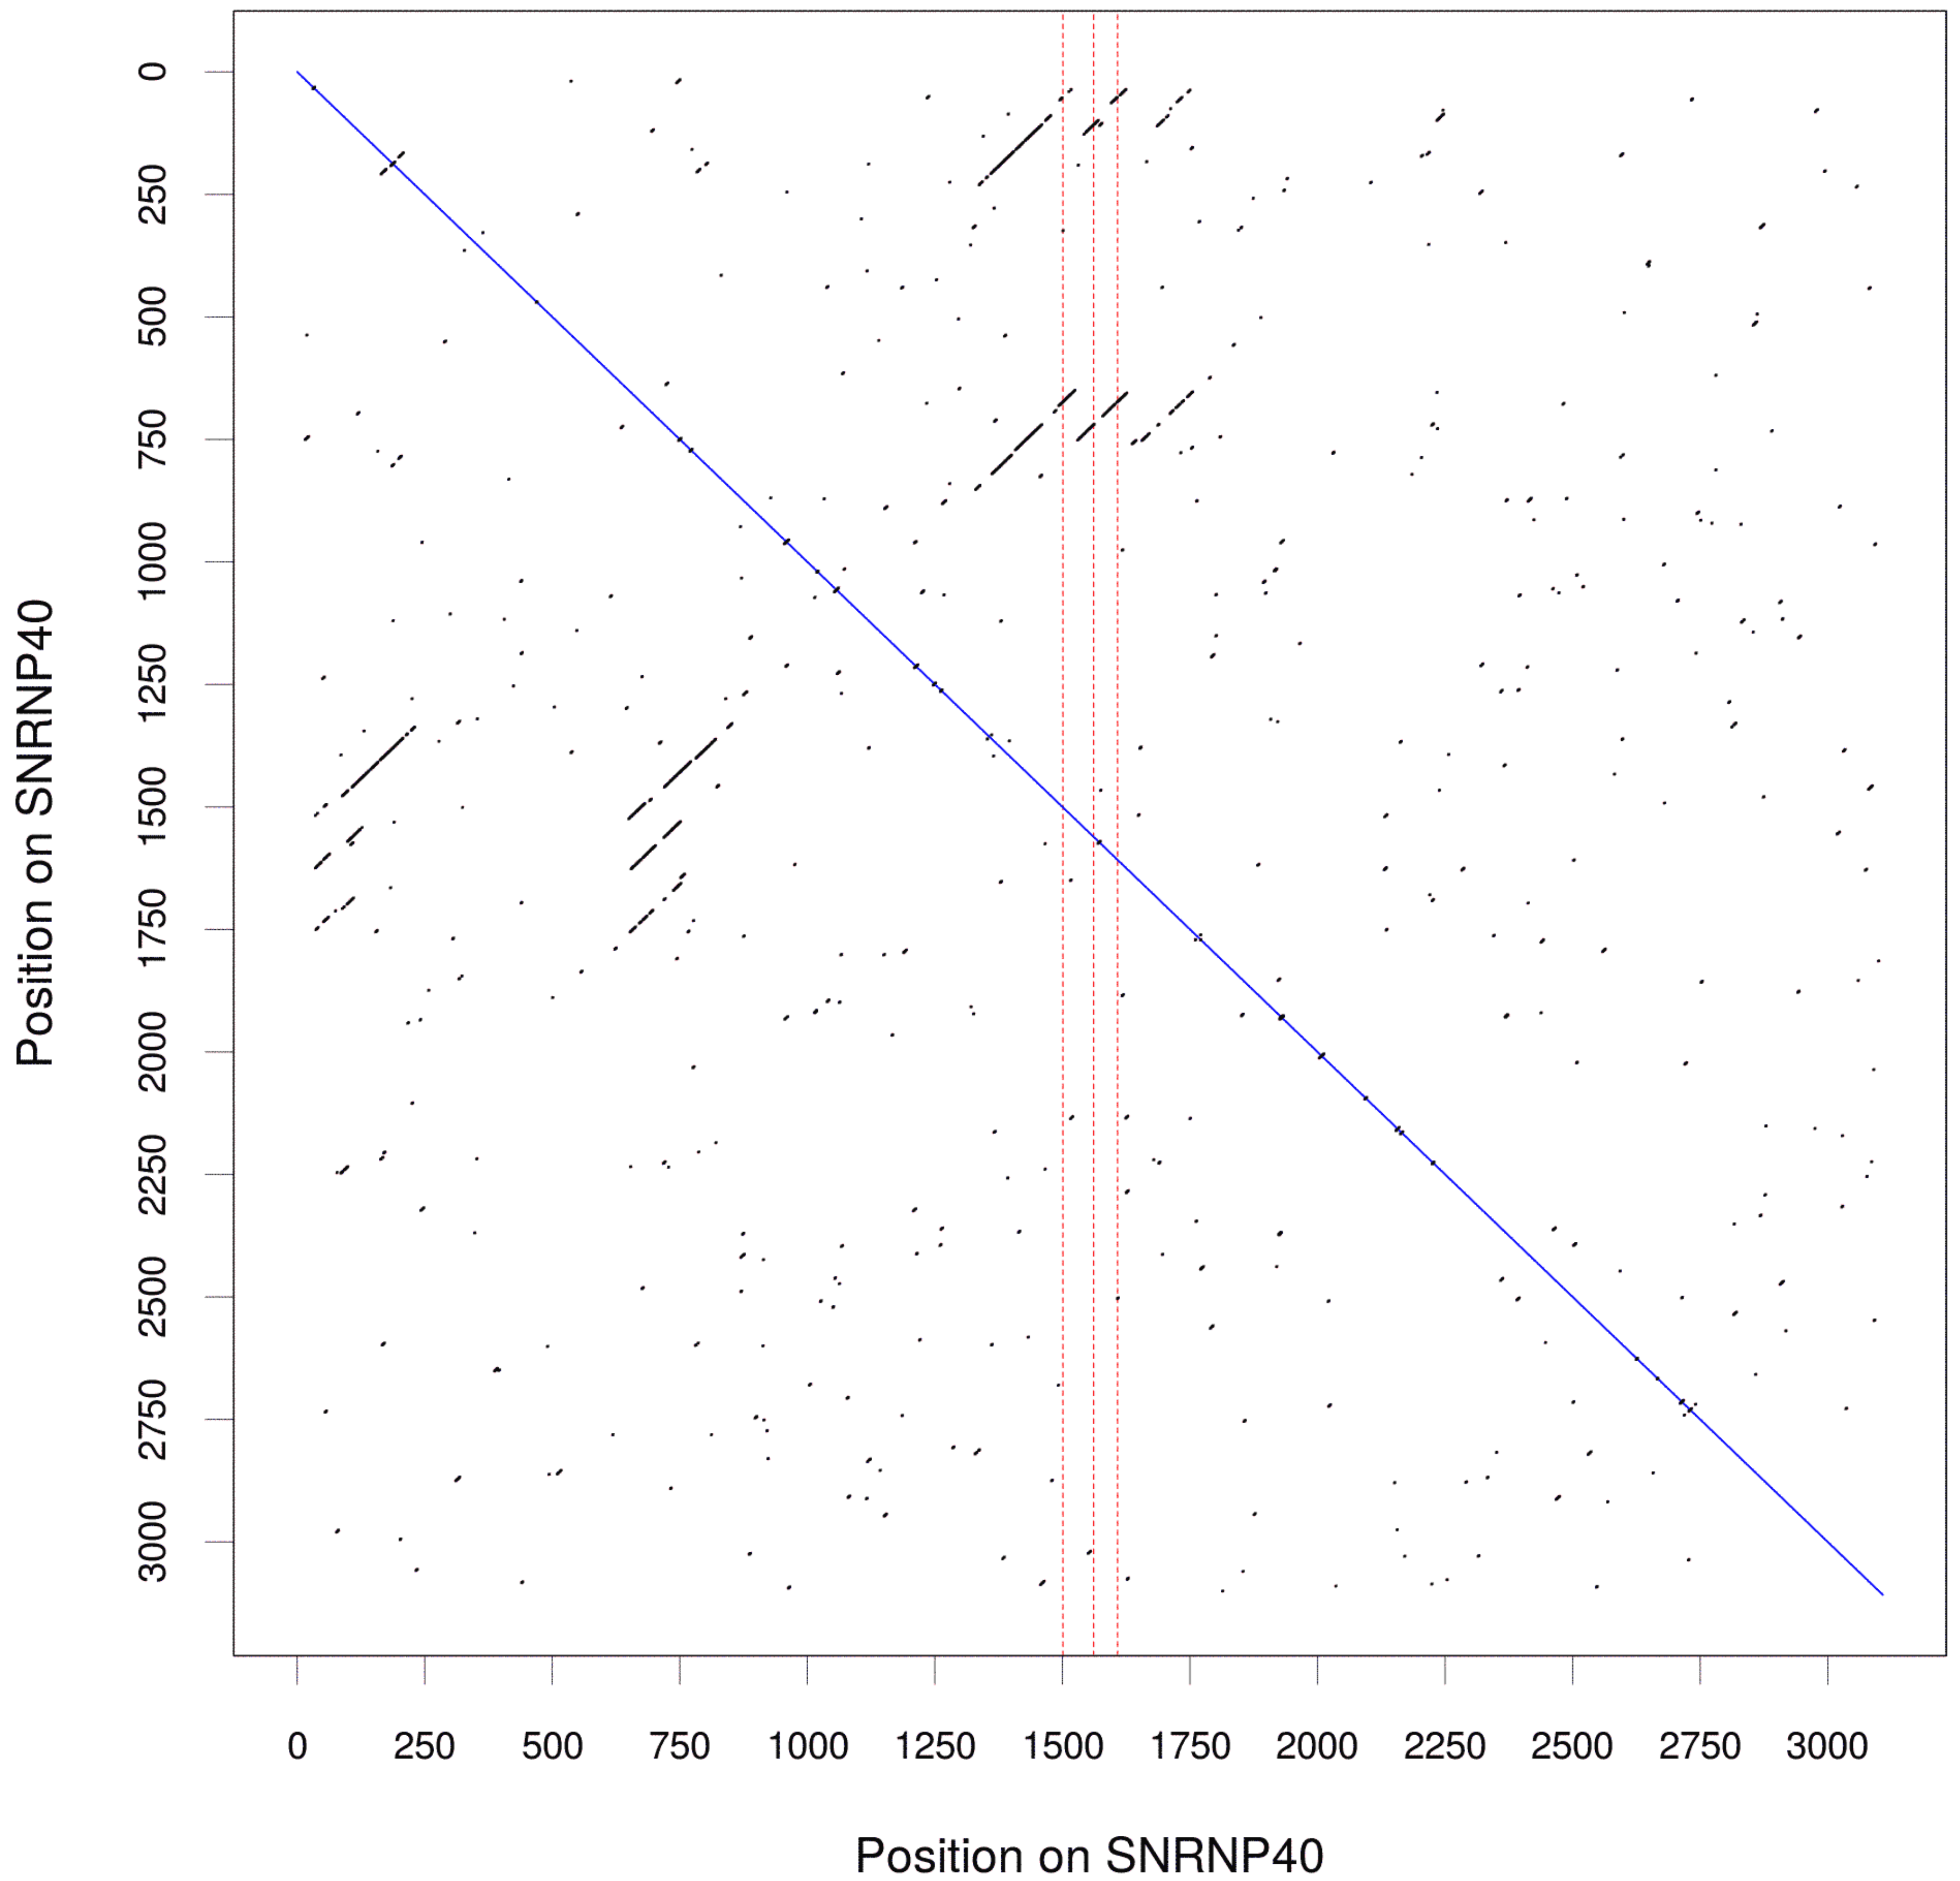

# SON

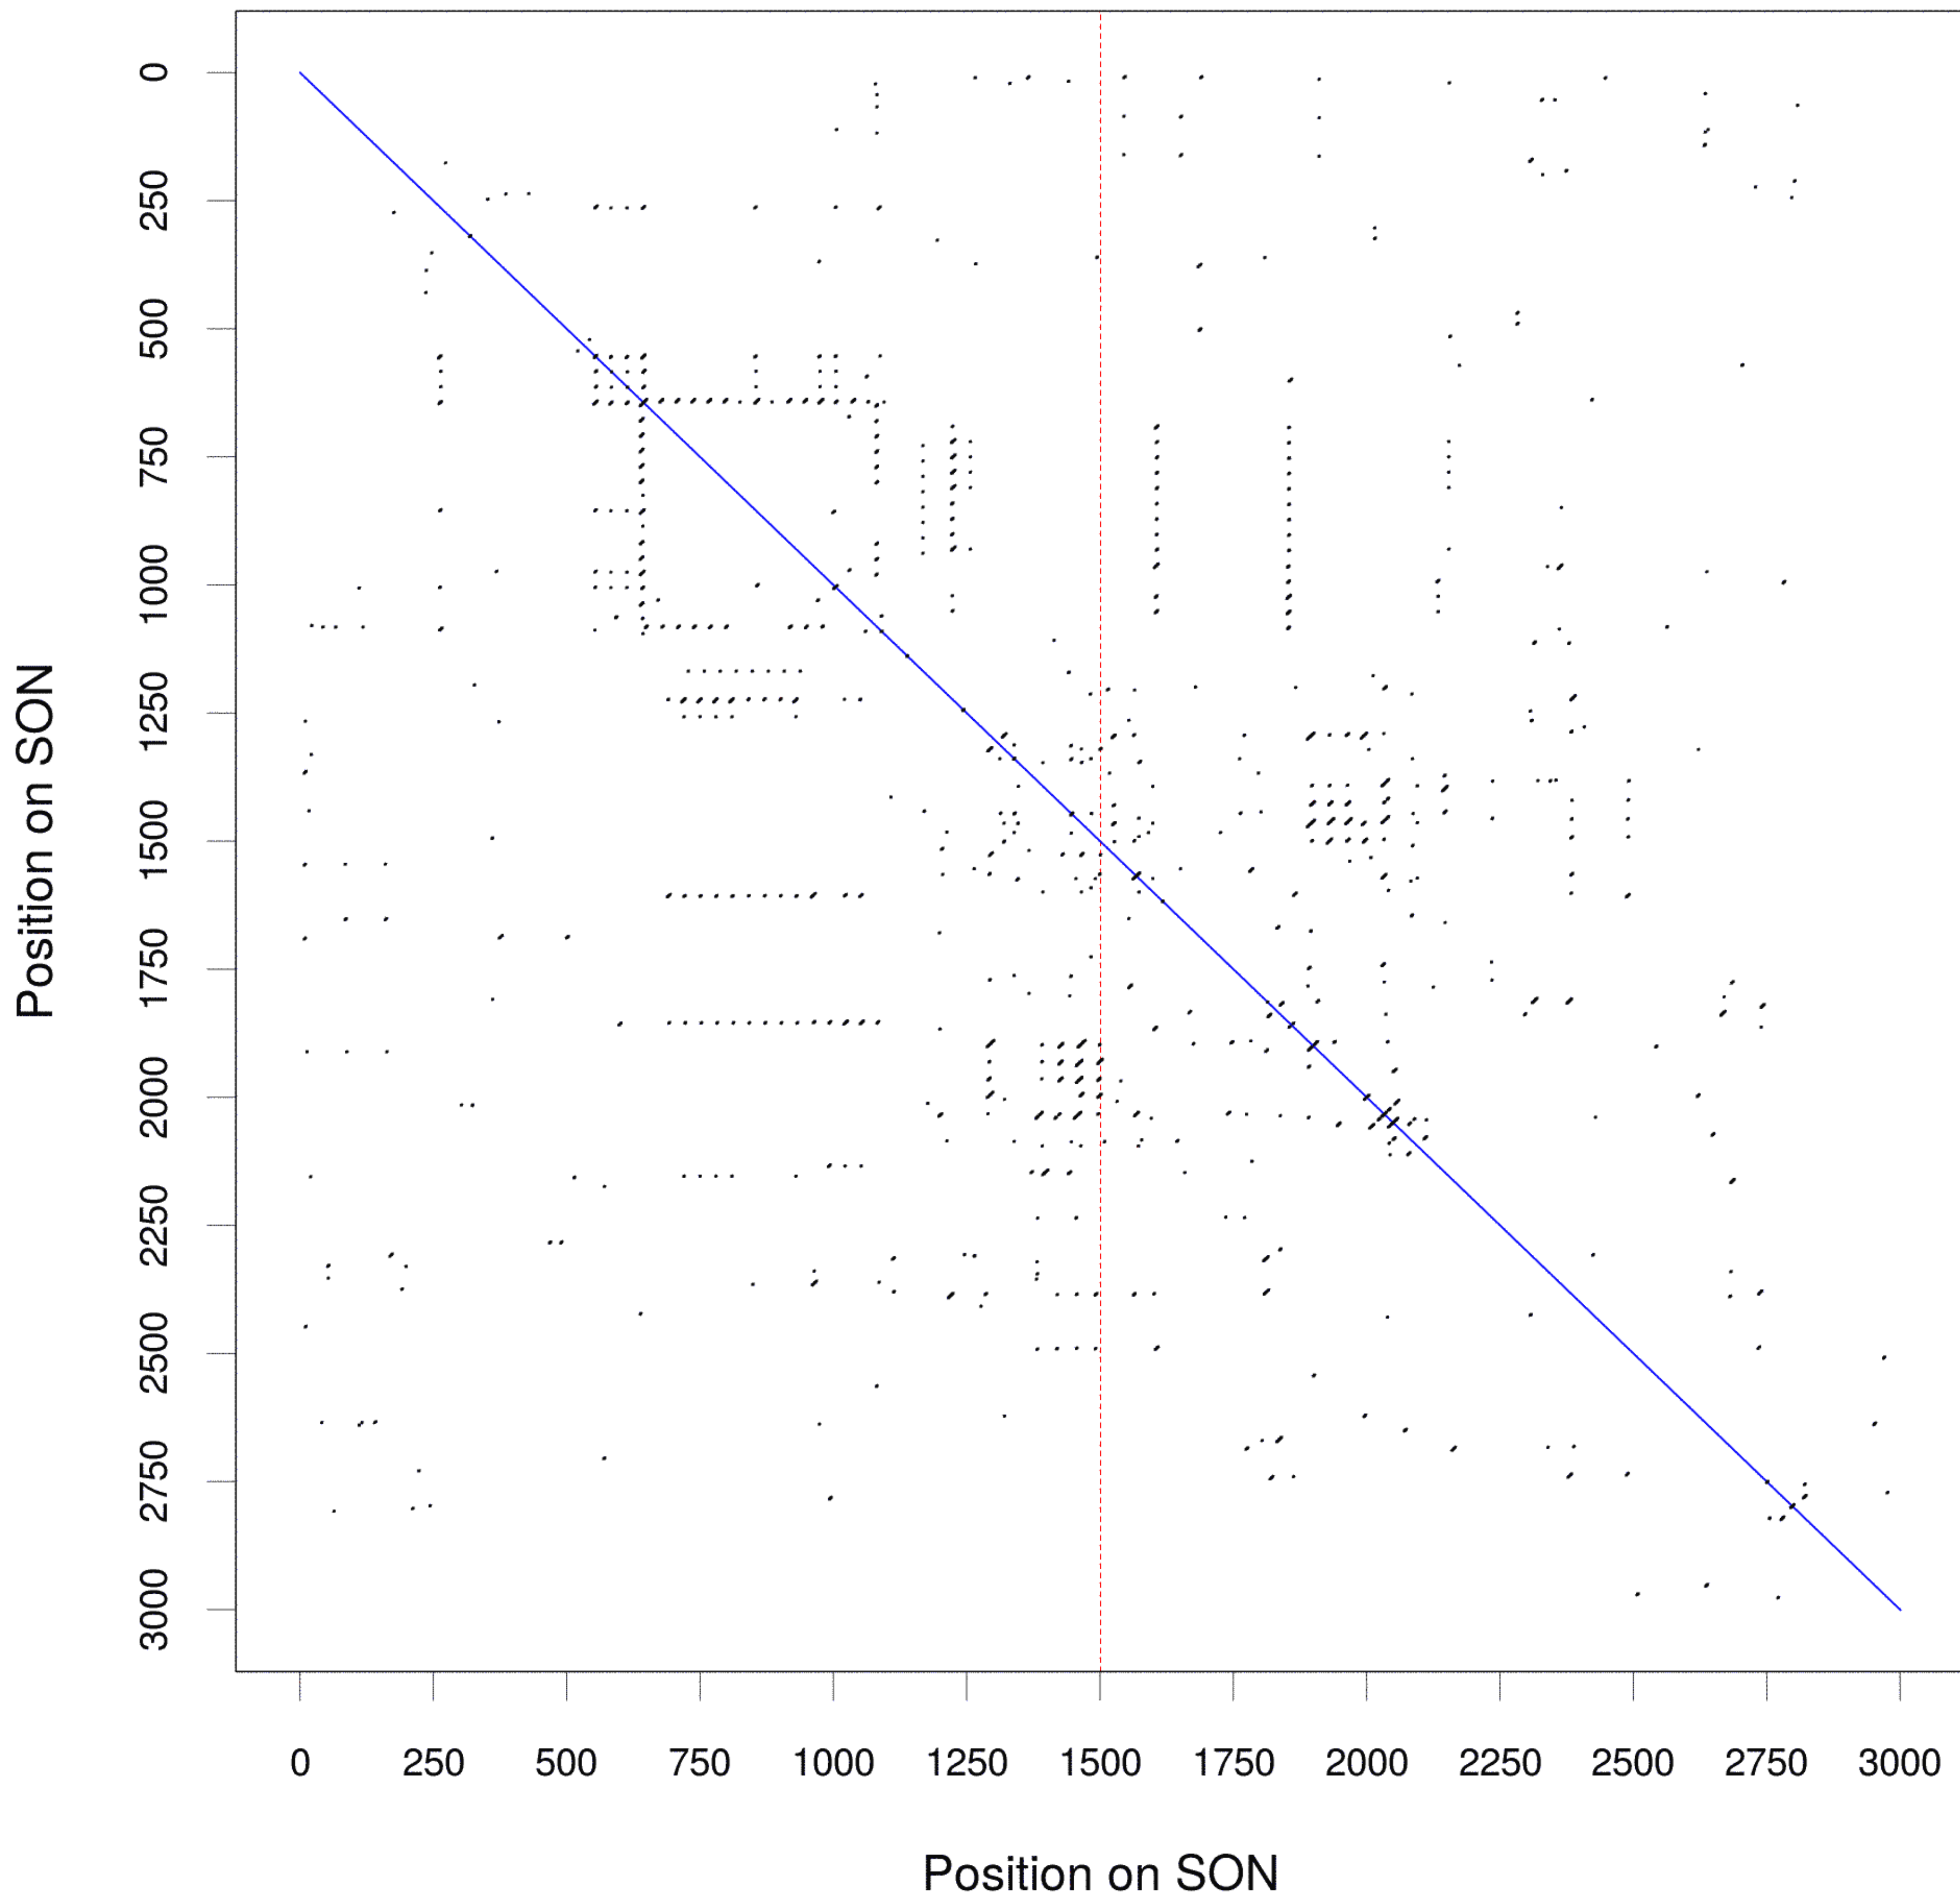

# SORBS3

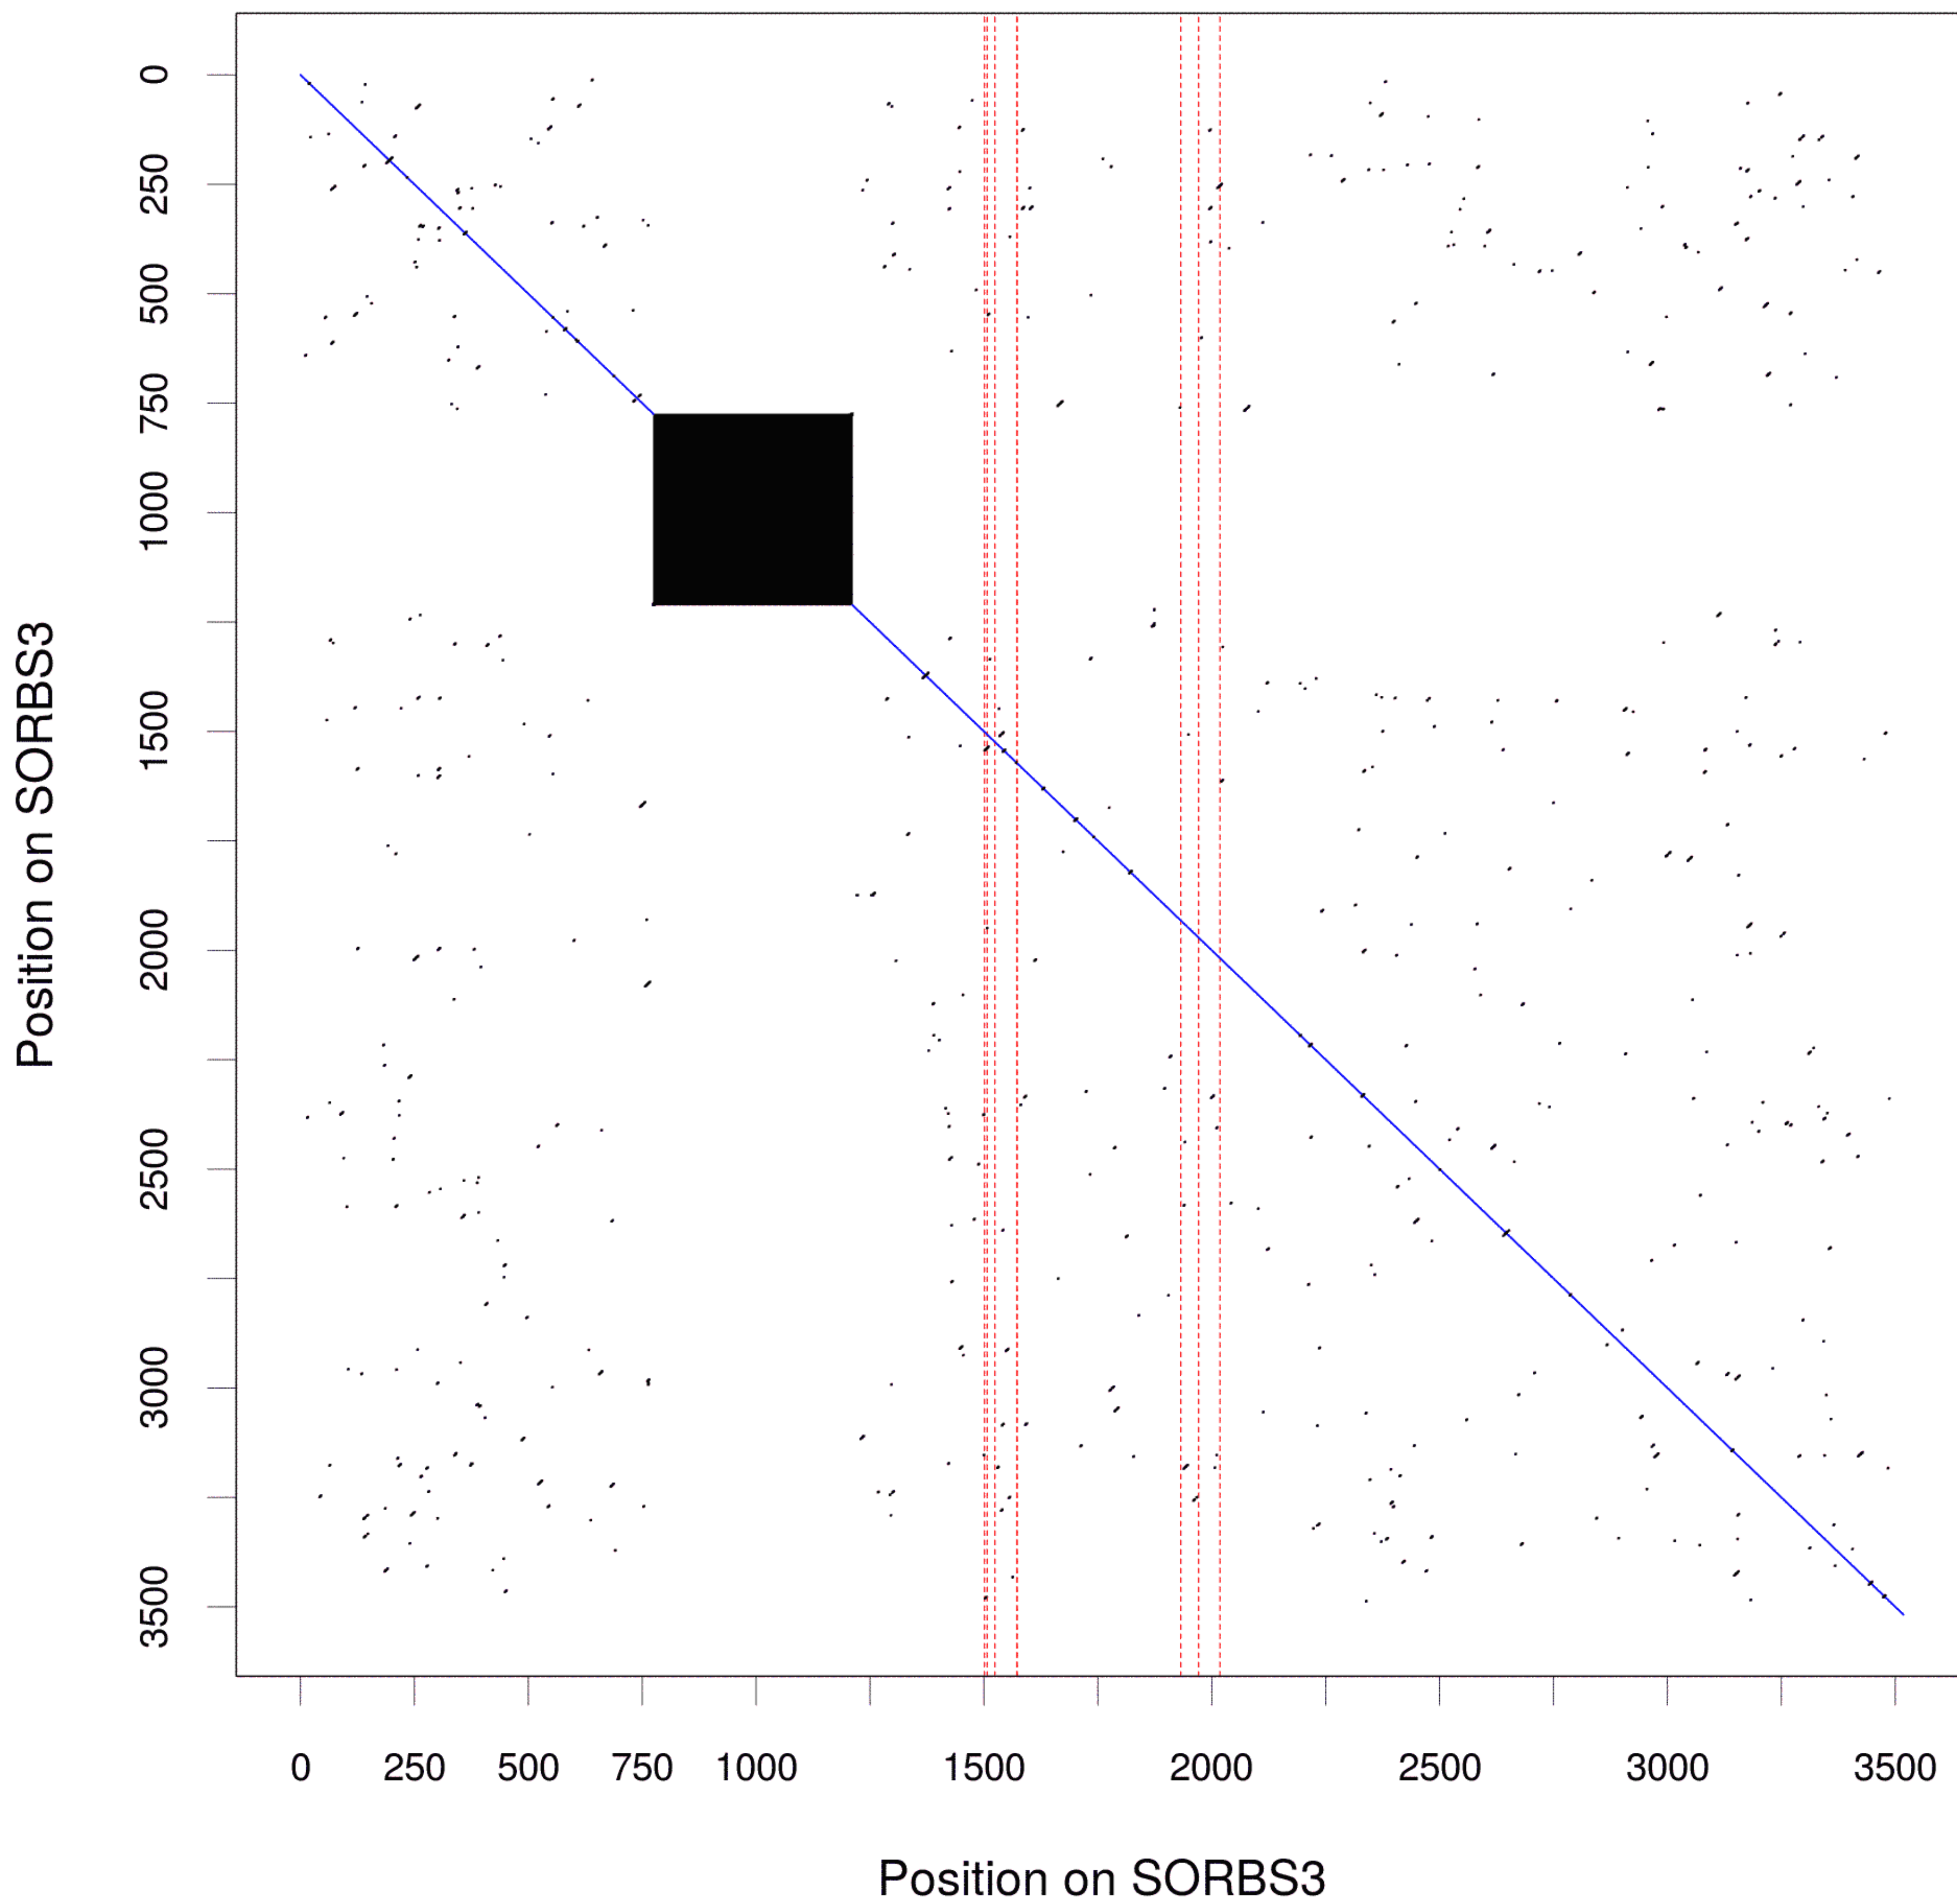

# SPG21

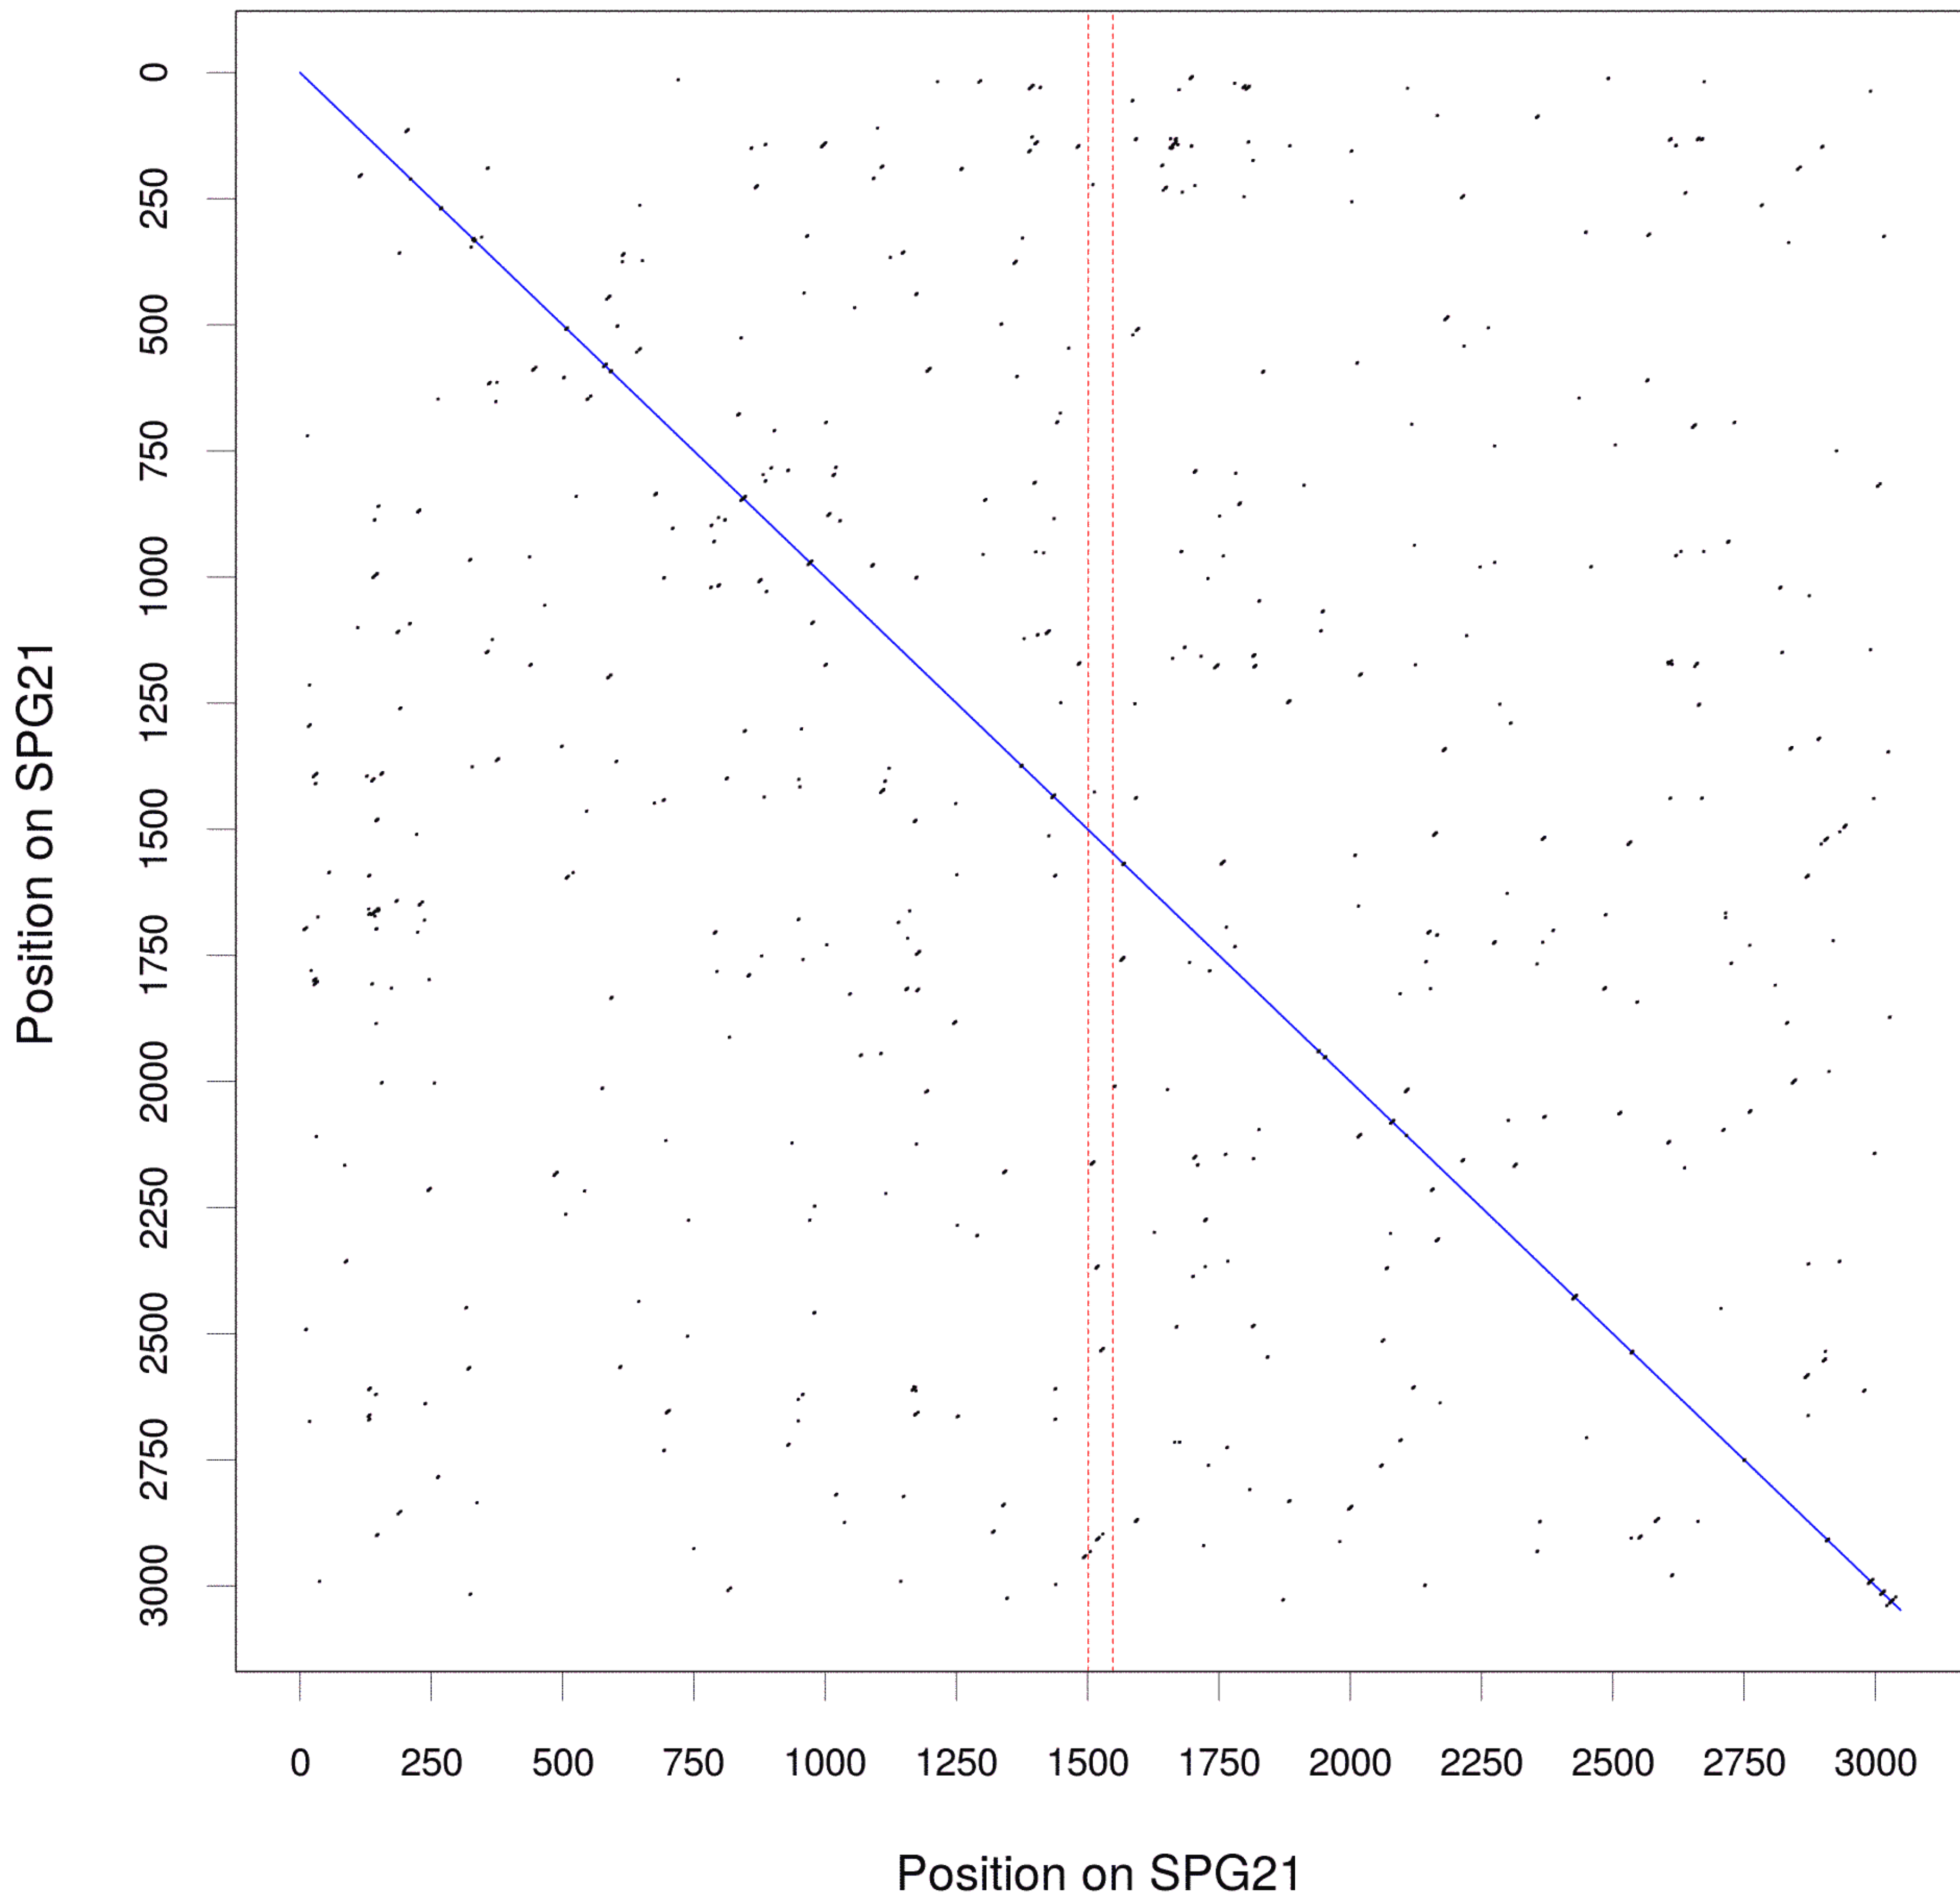

# SPINT2

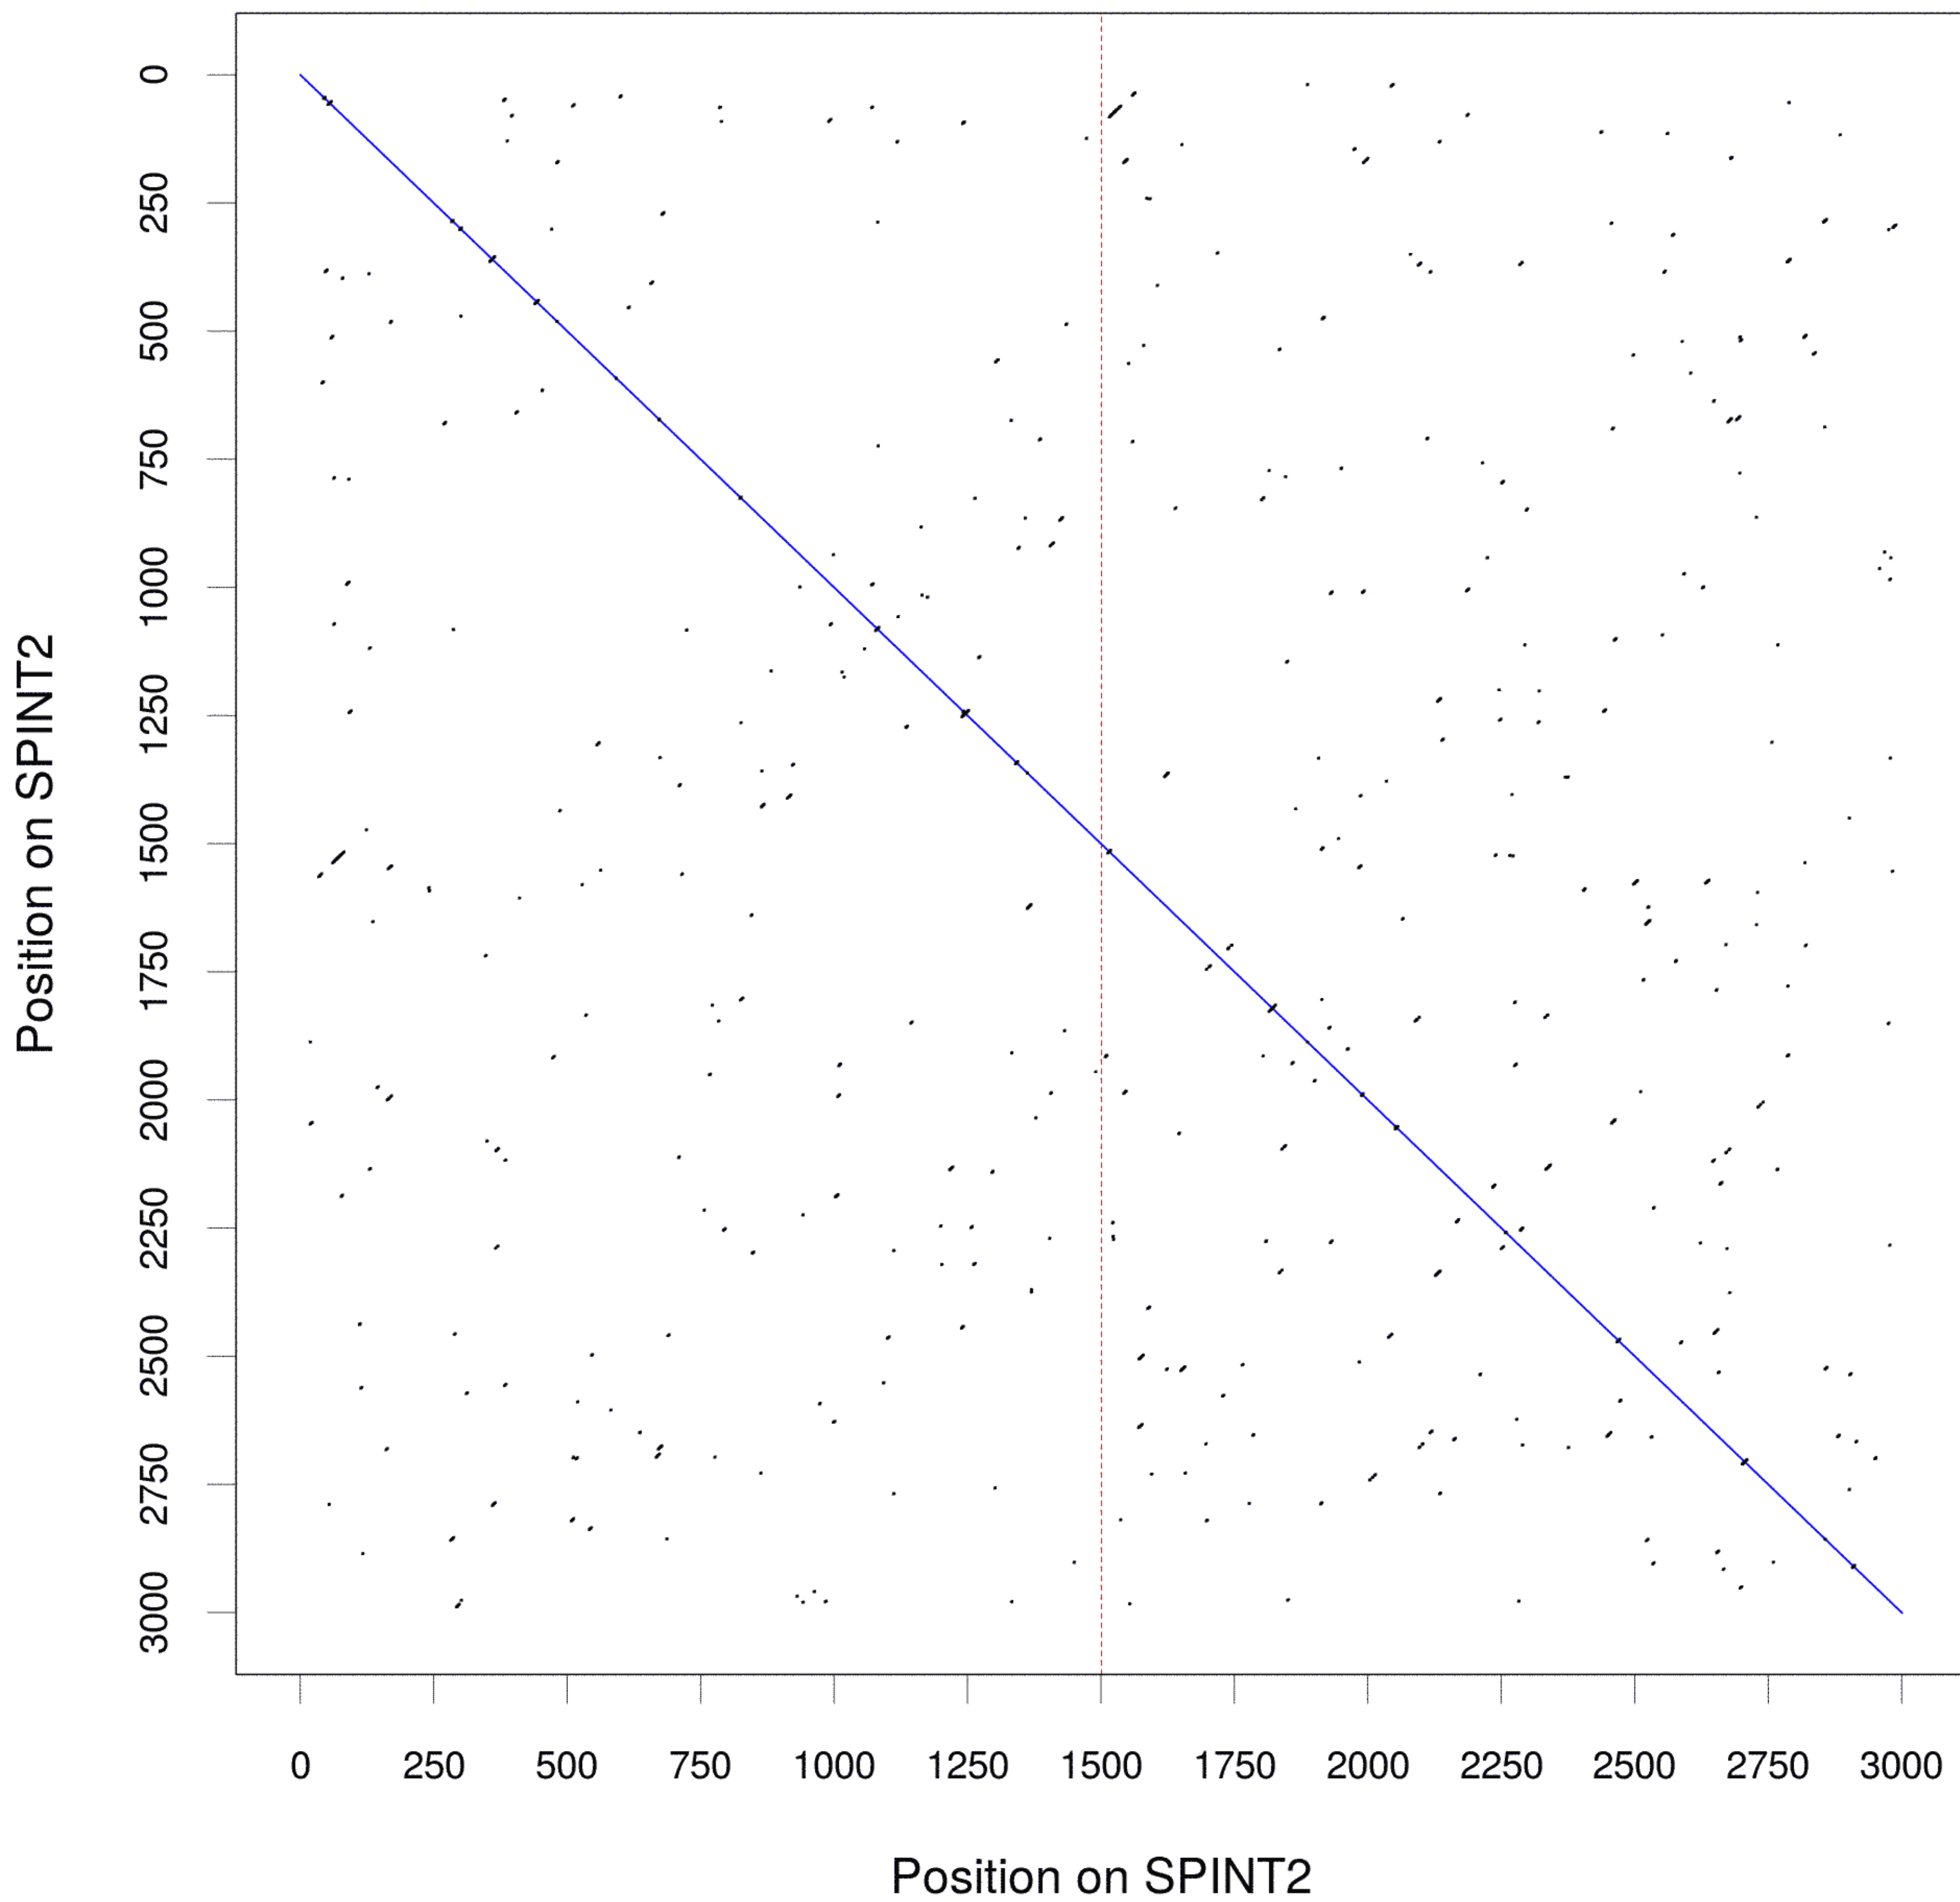



# SPTLC1

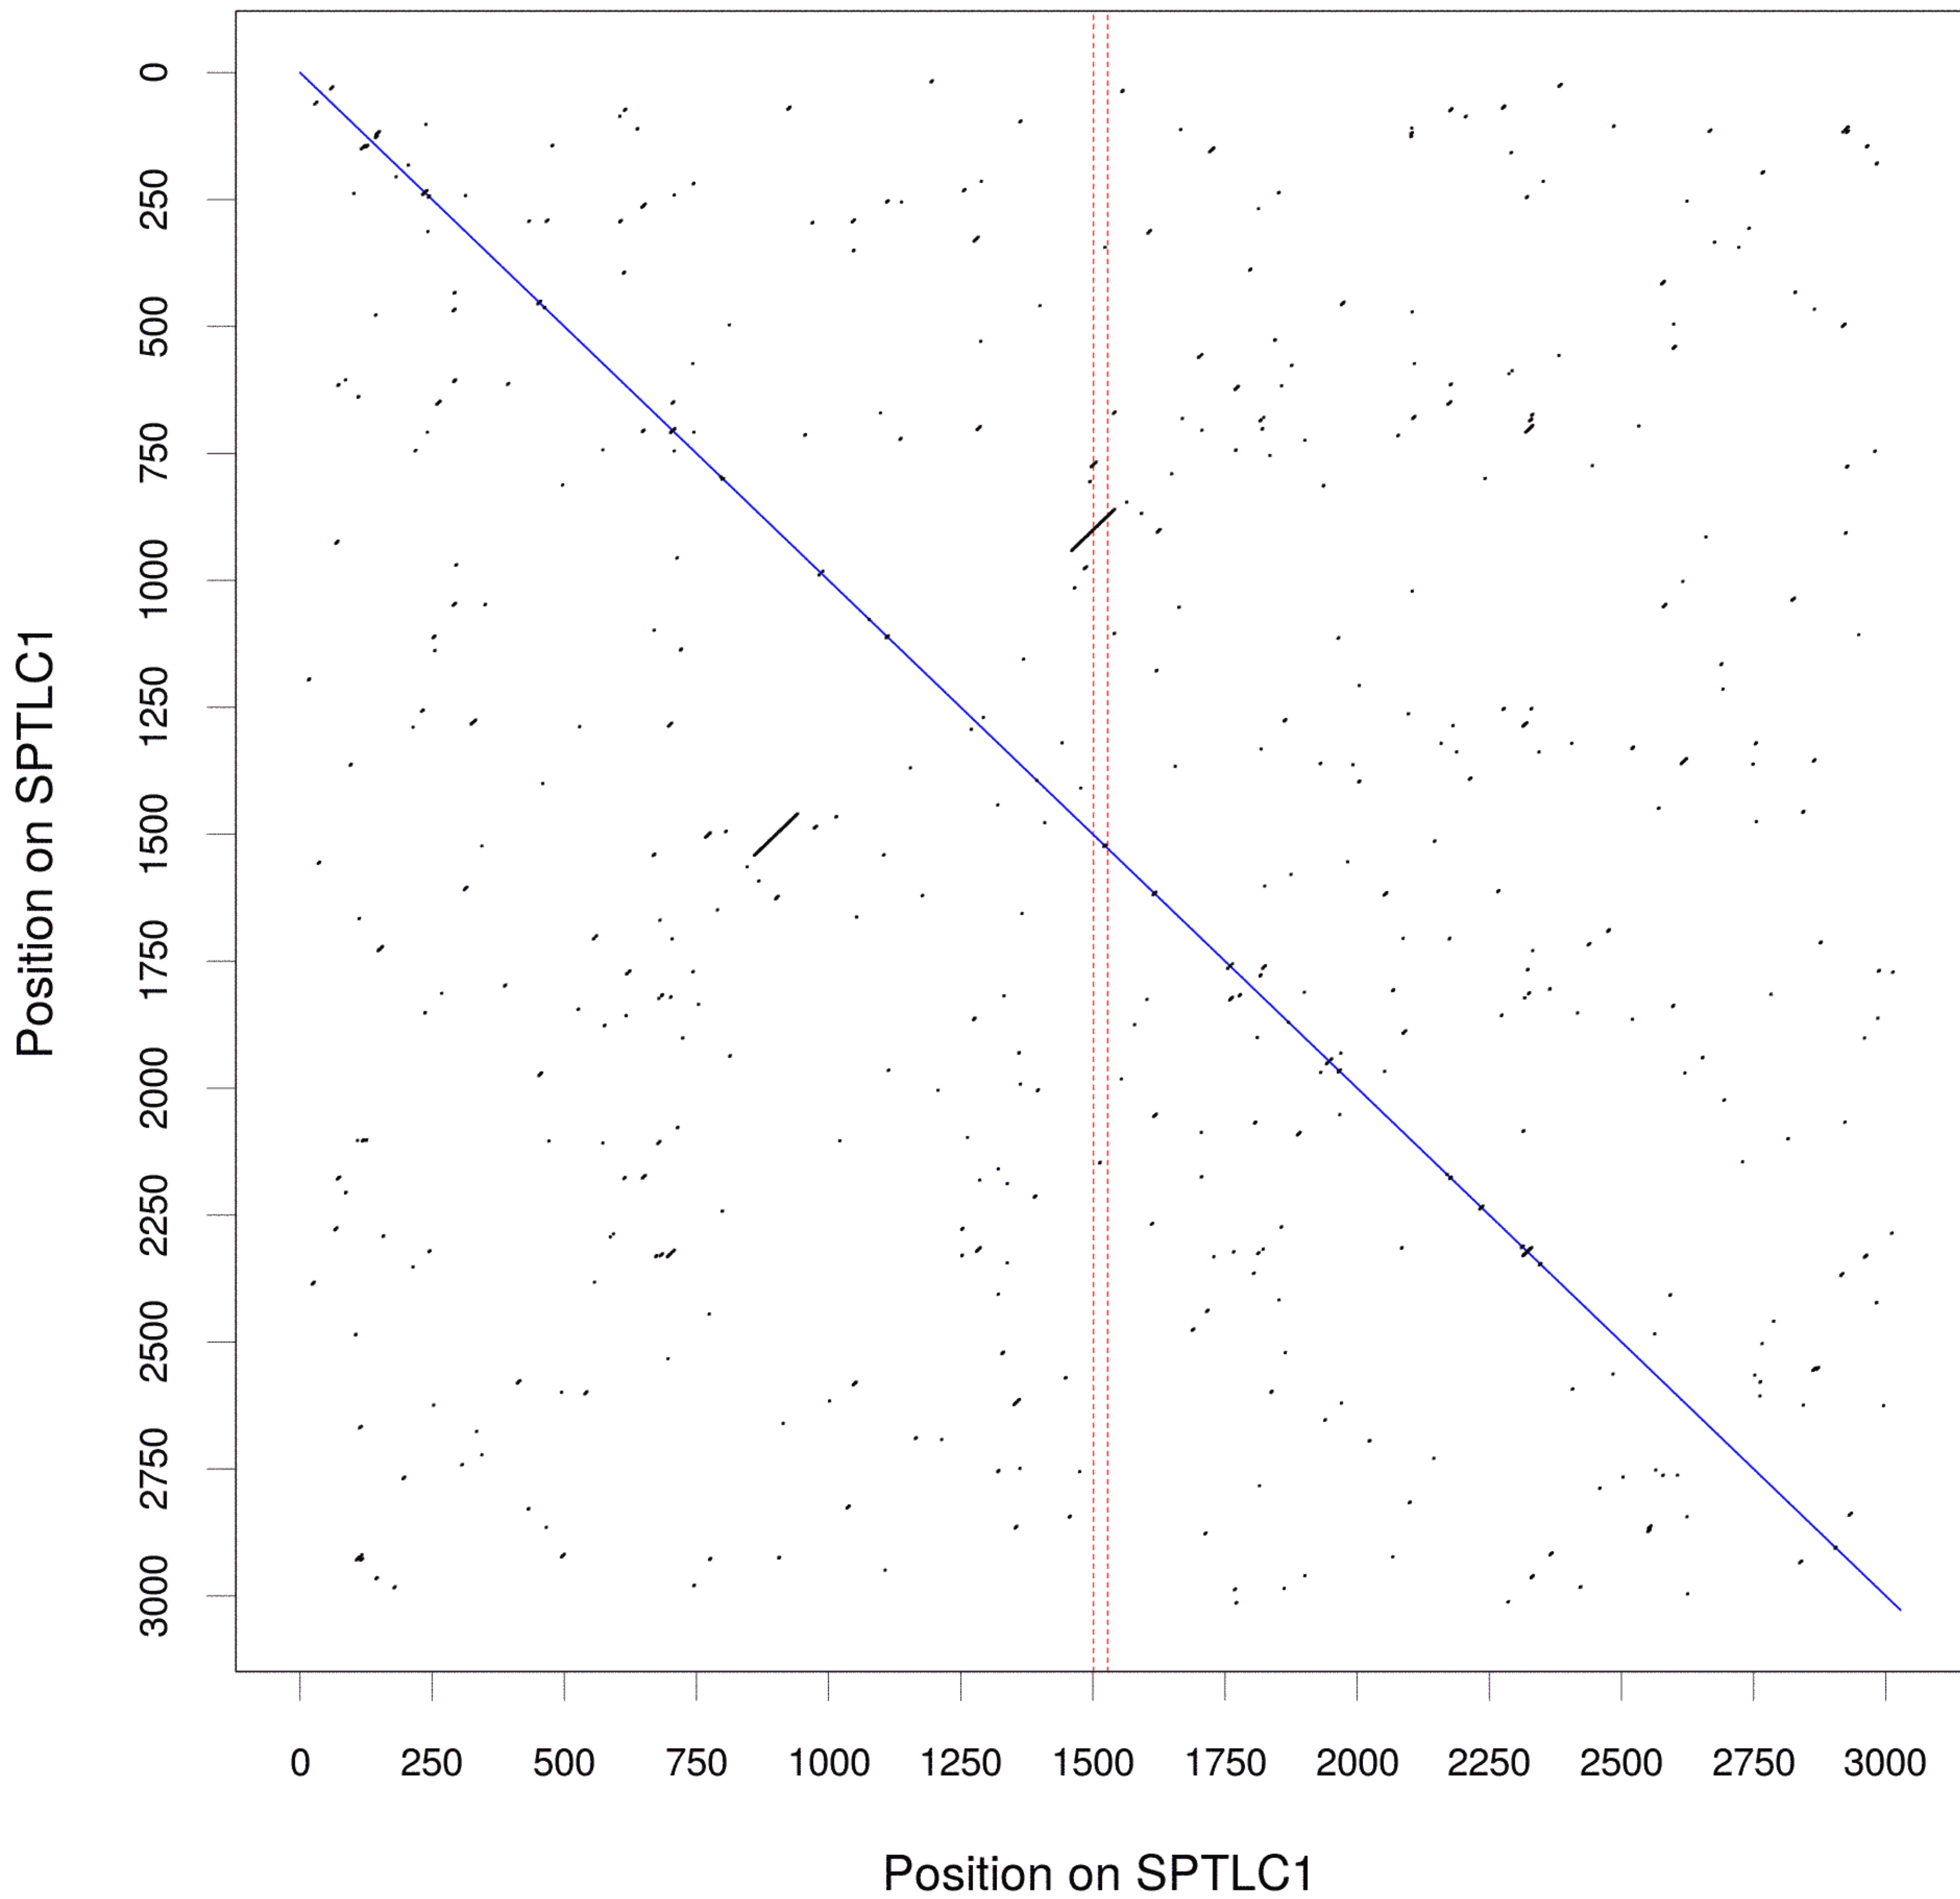

# SPTSSA

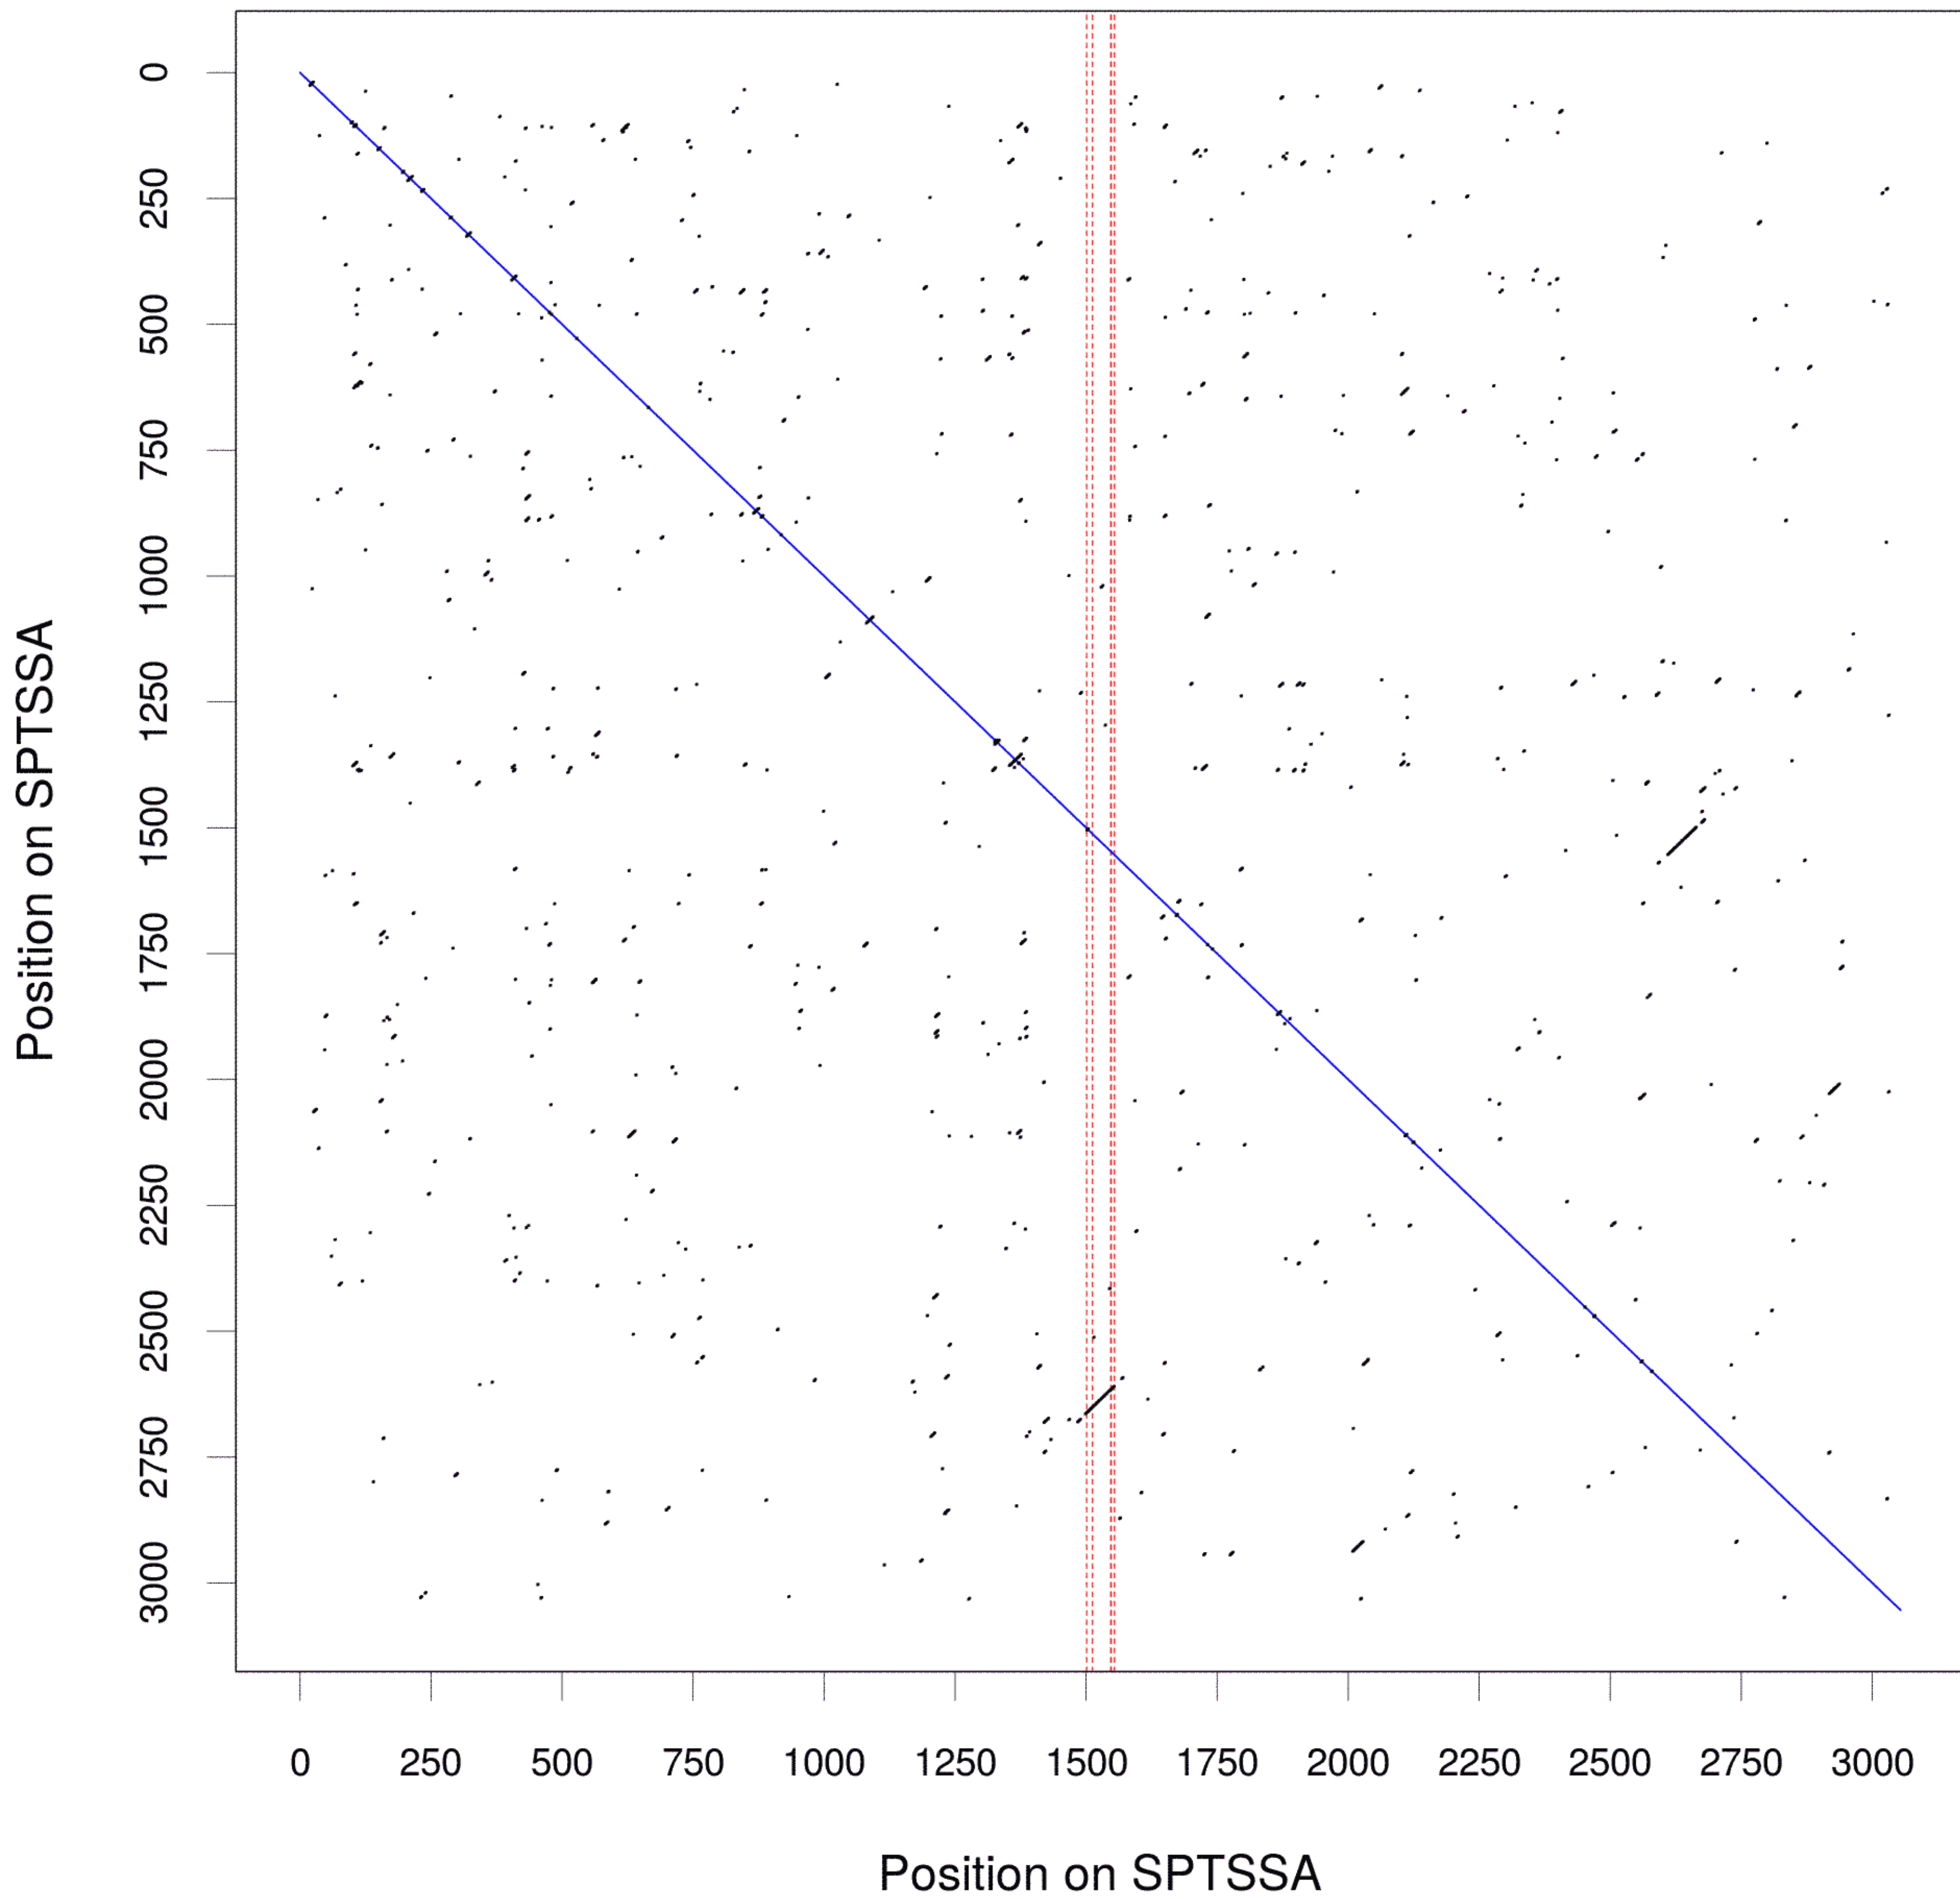

# STAT5A

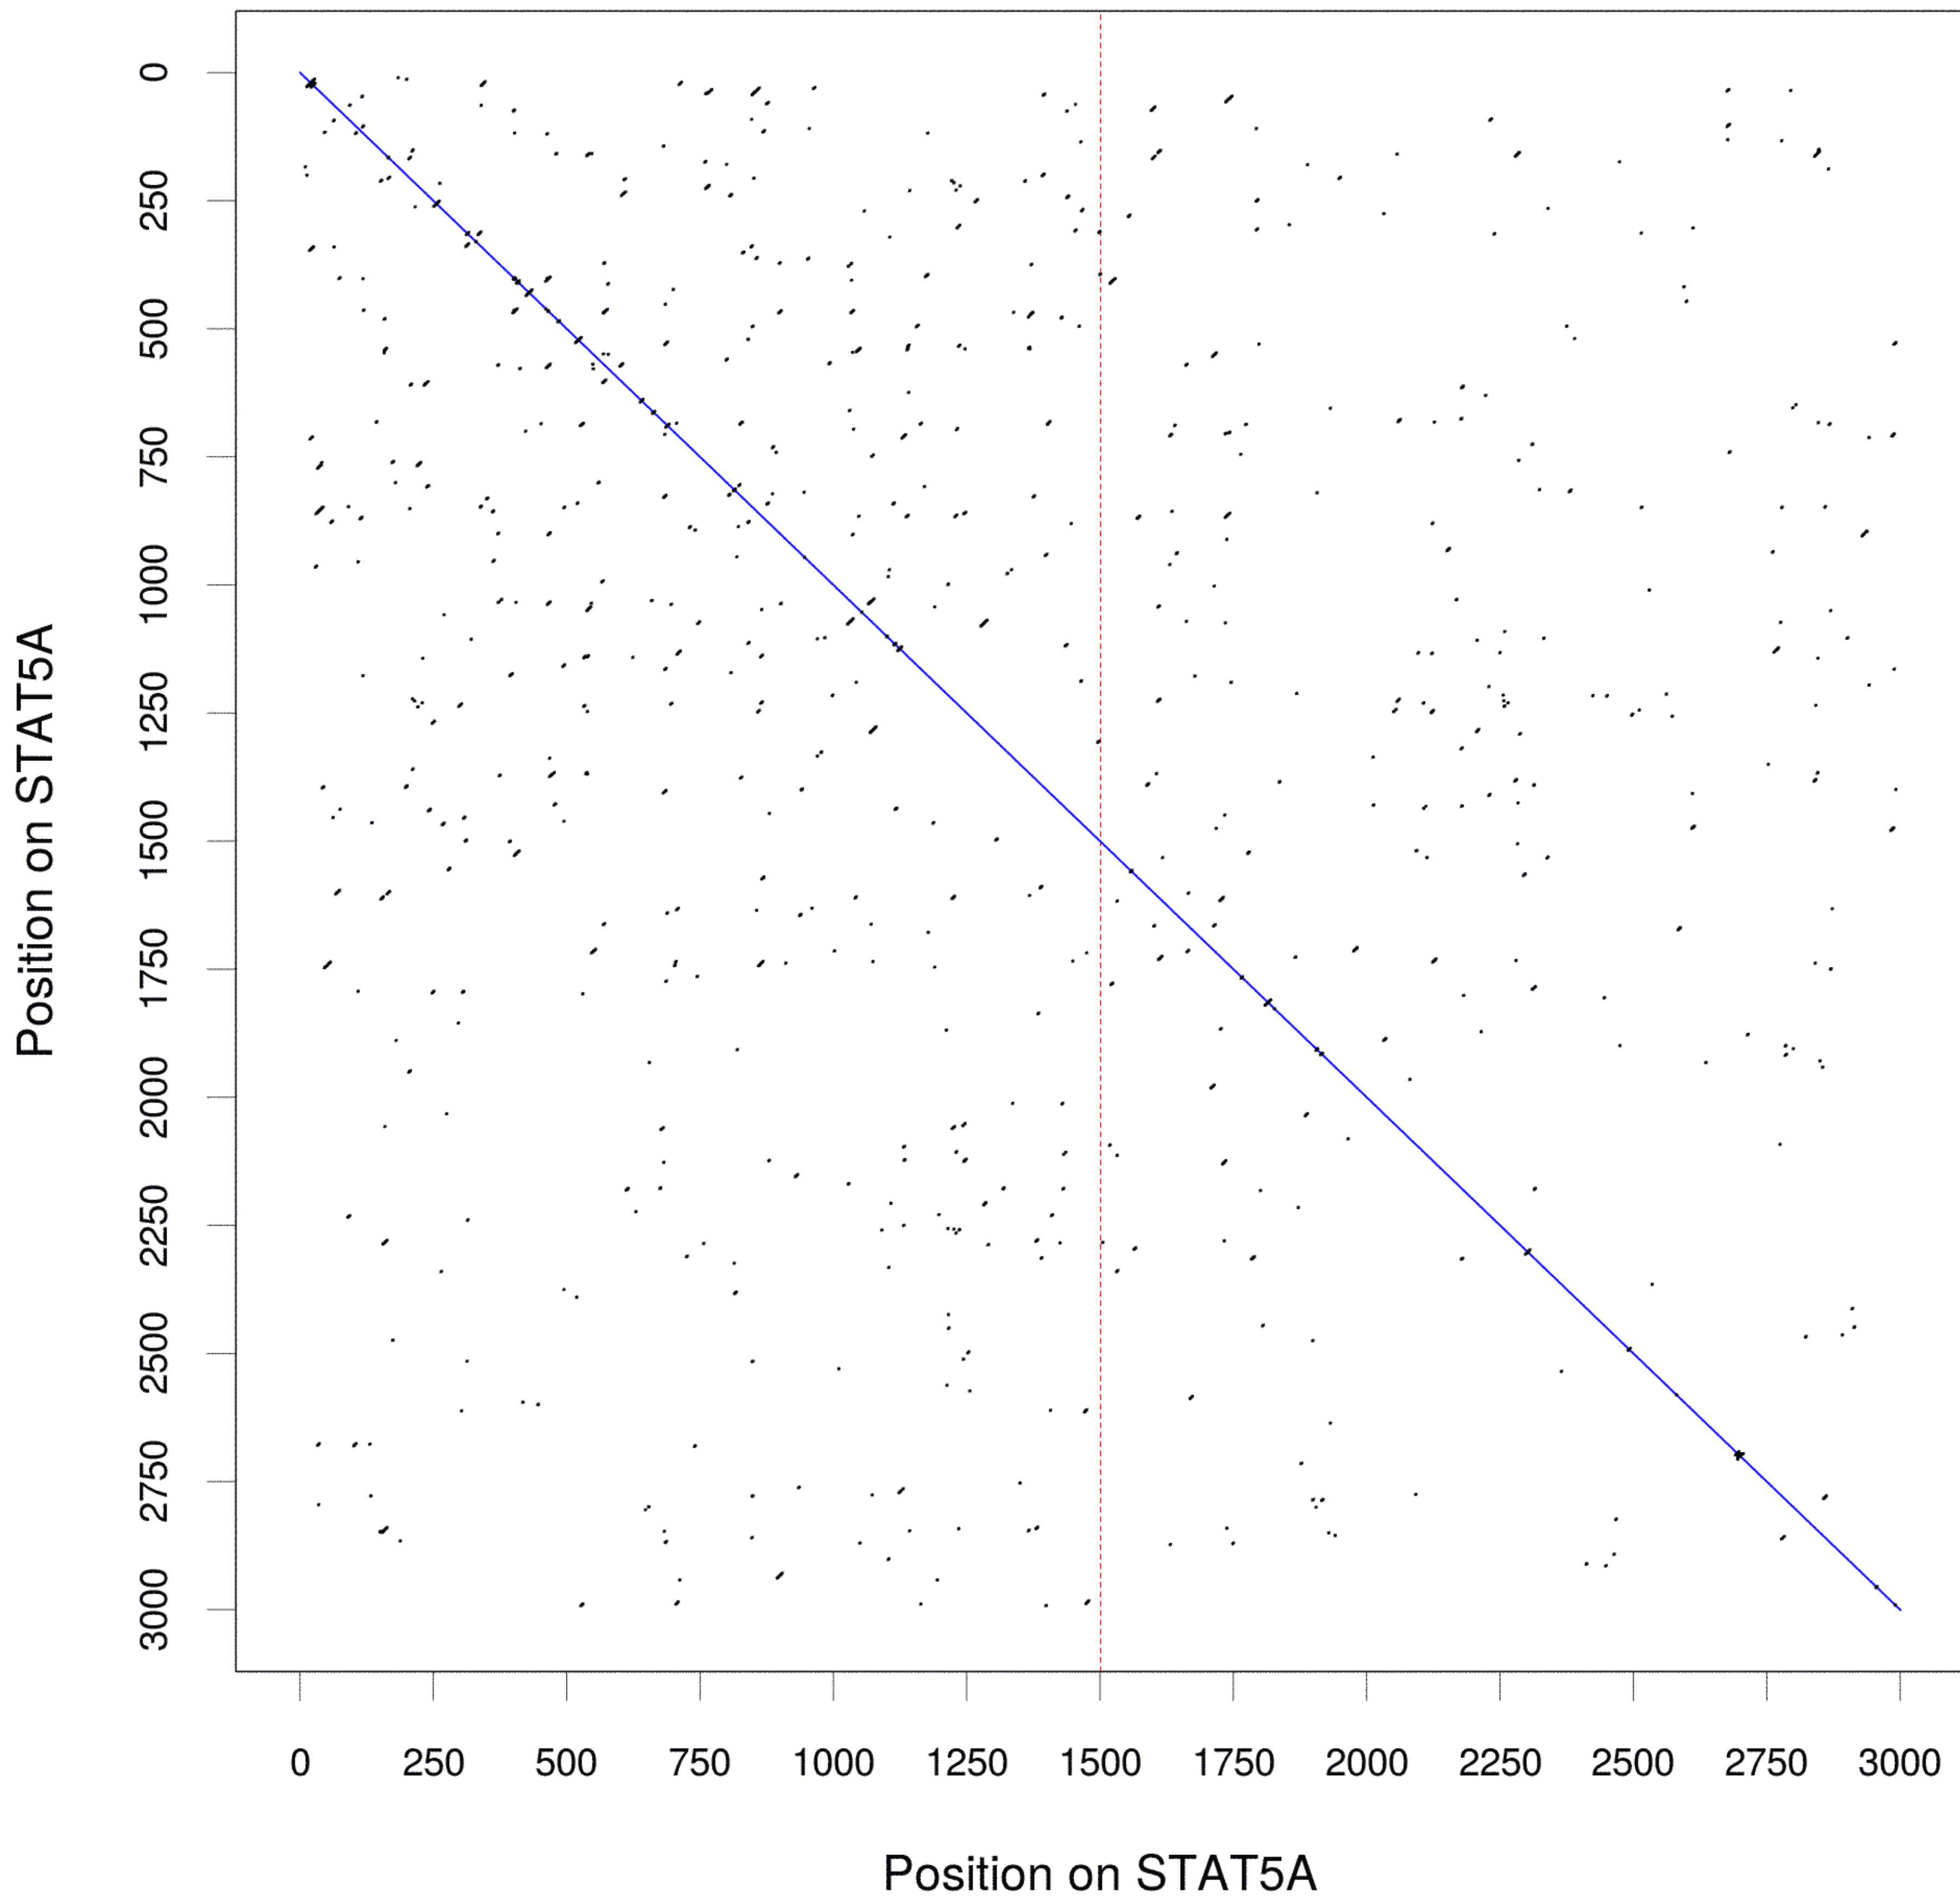

# STAT5B

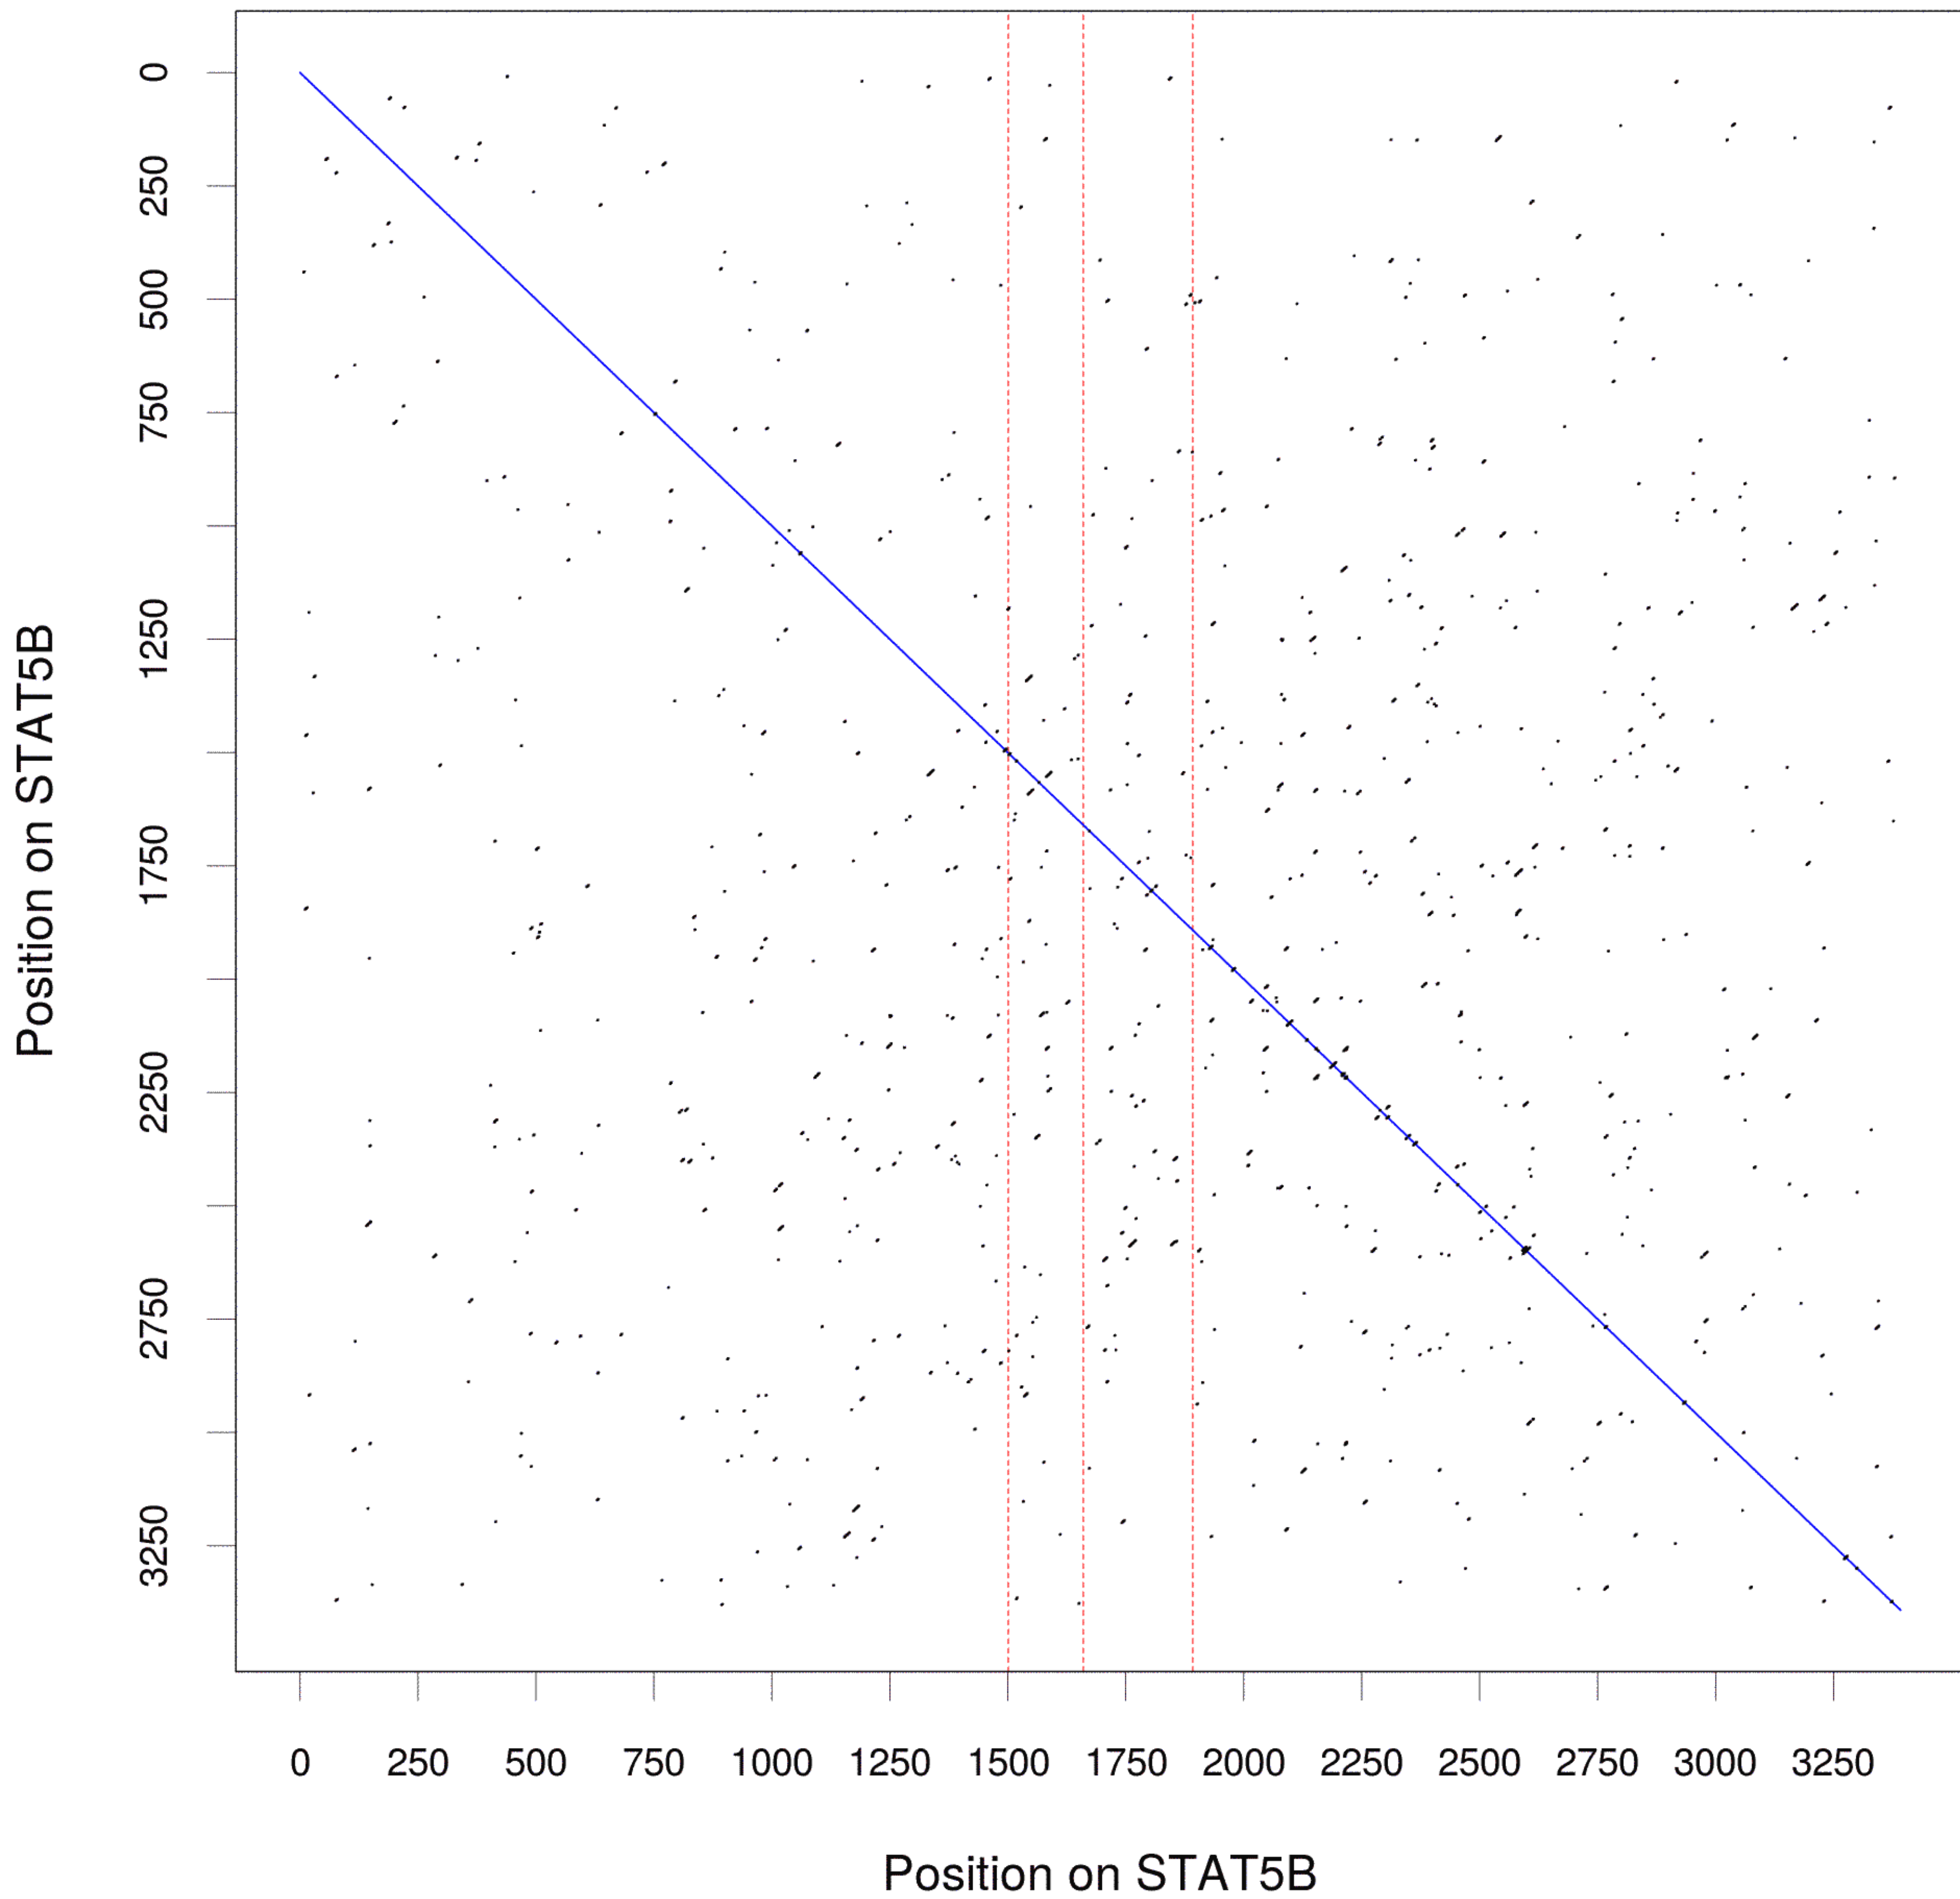

# STK19

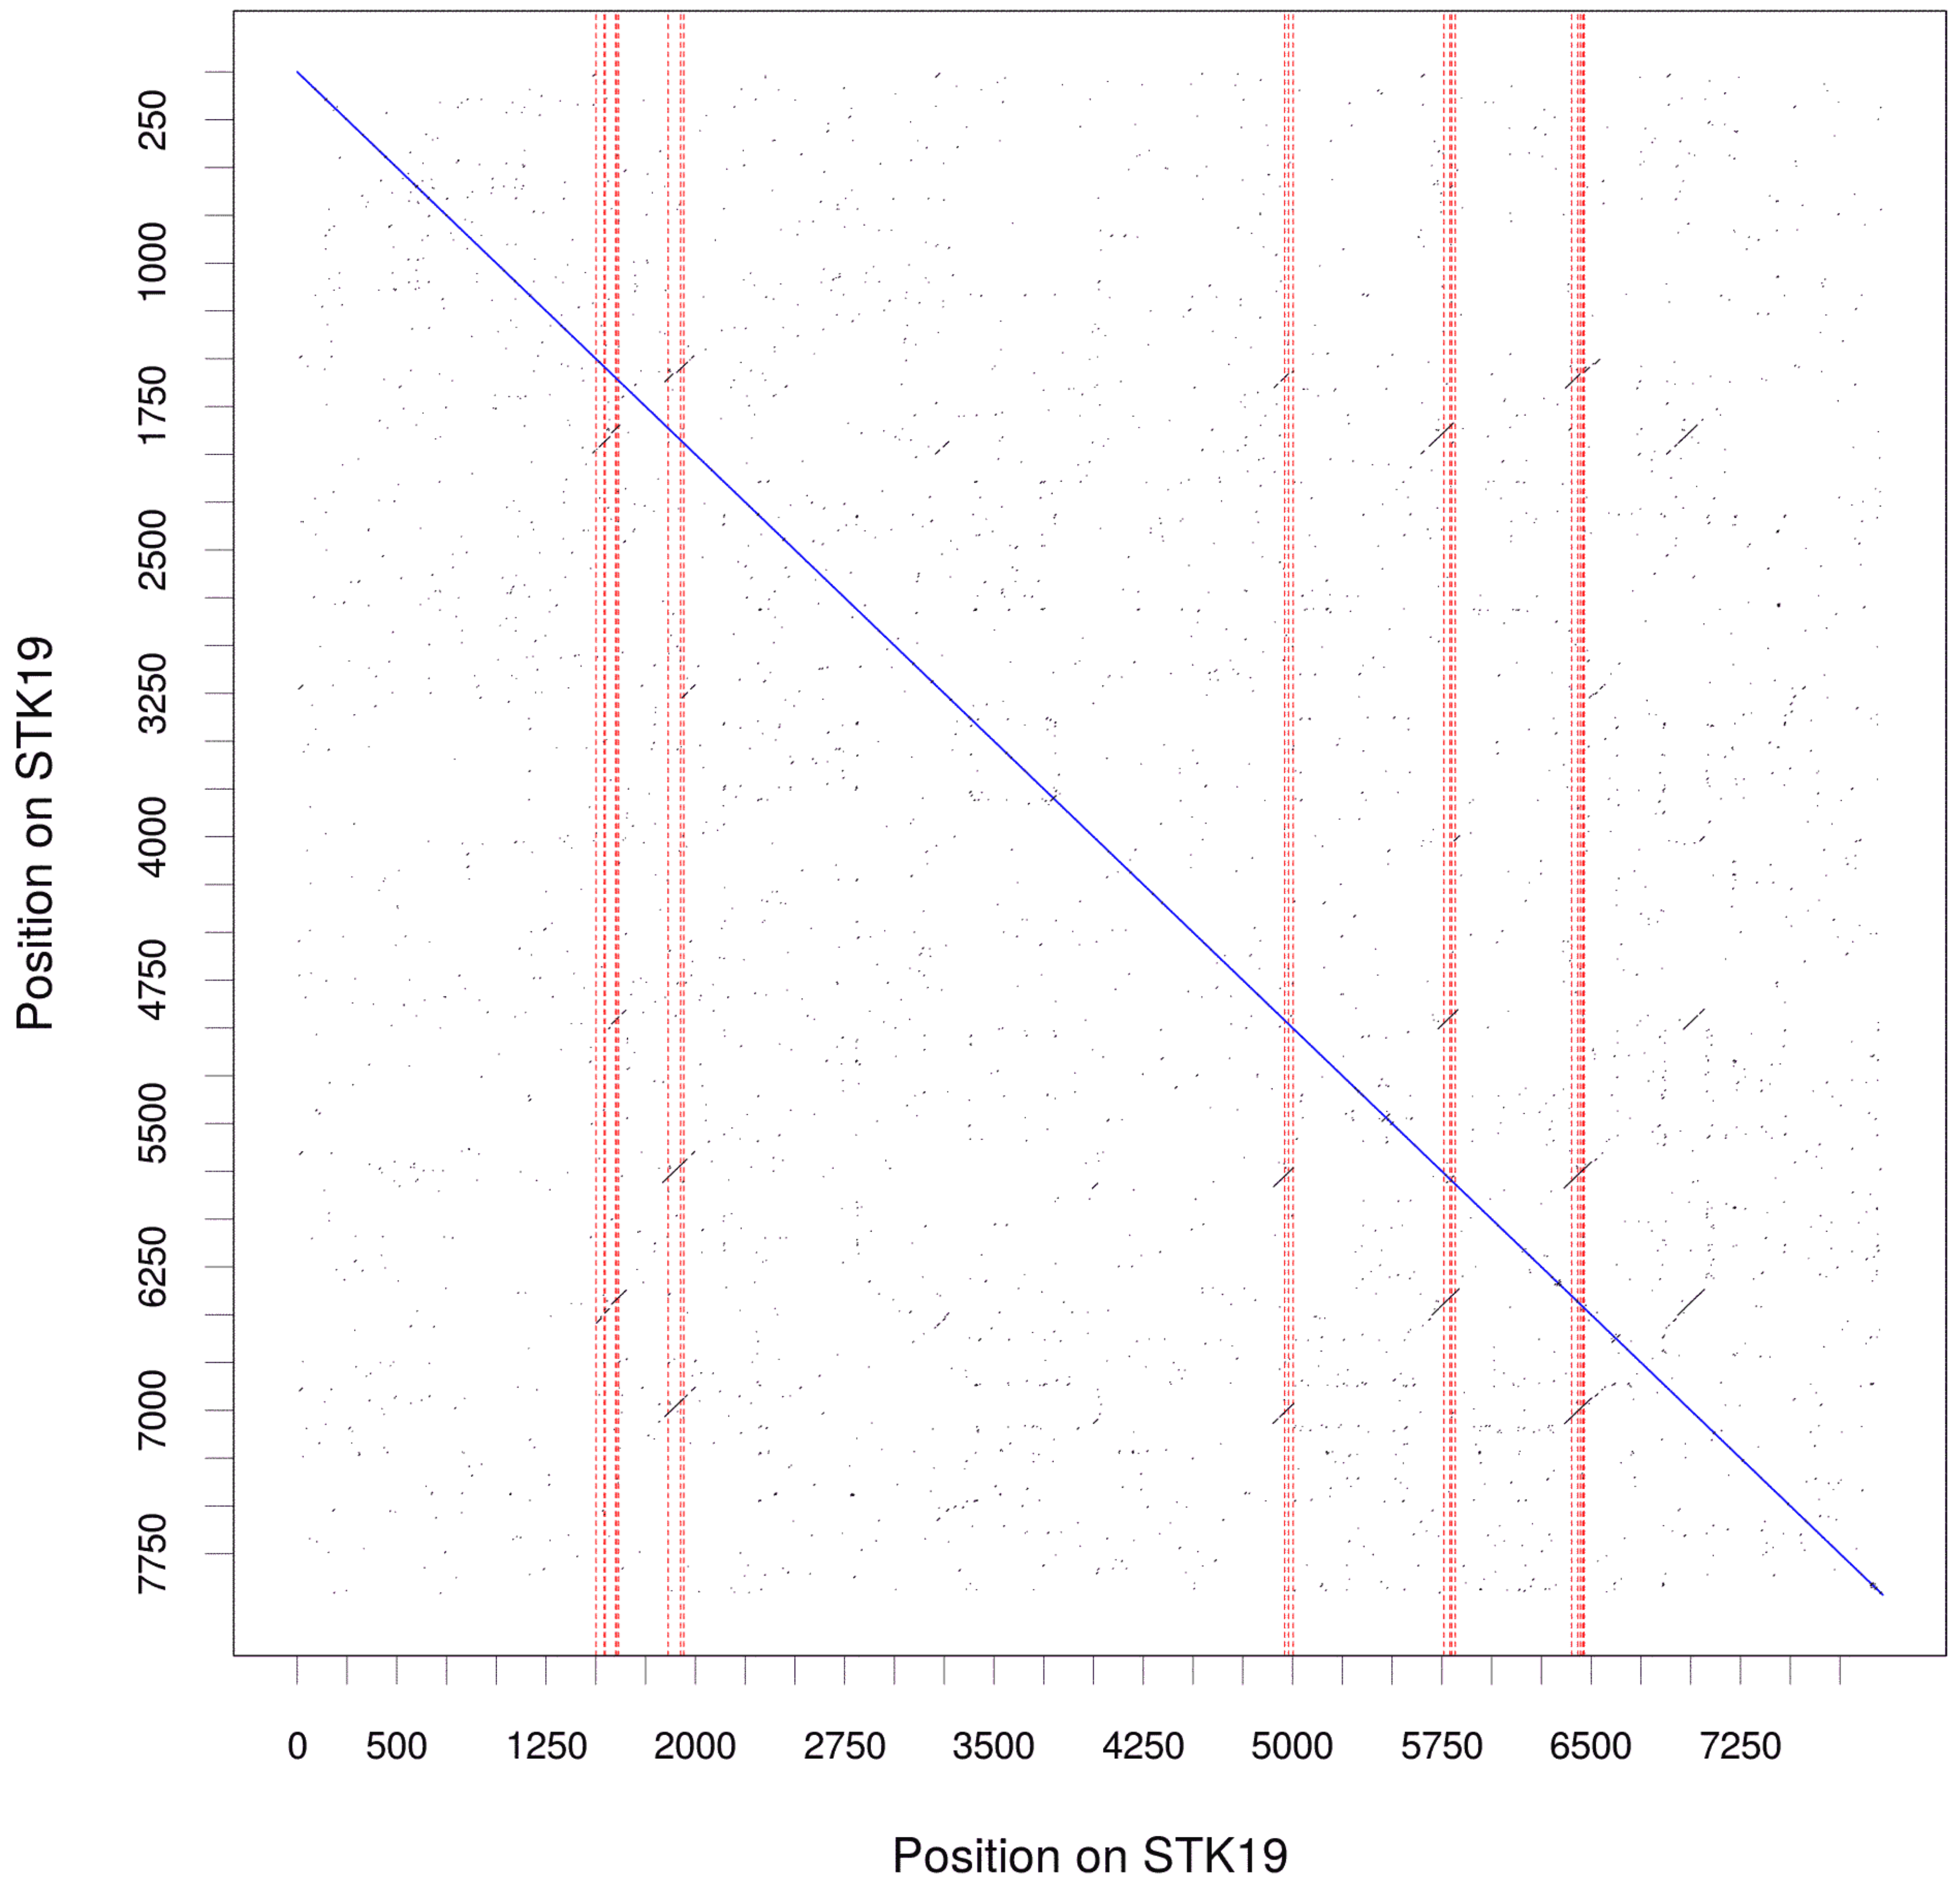

# SUCO

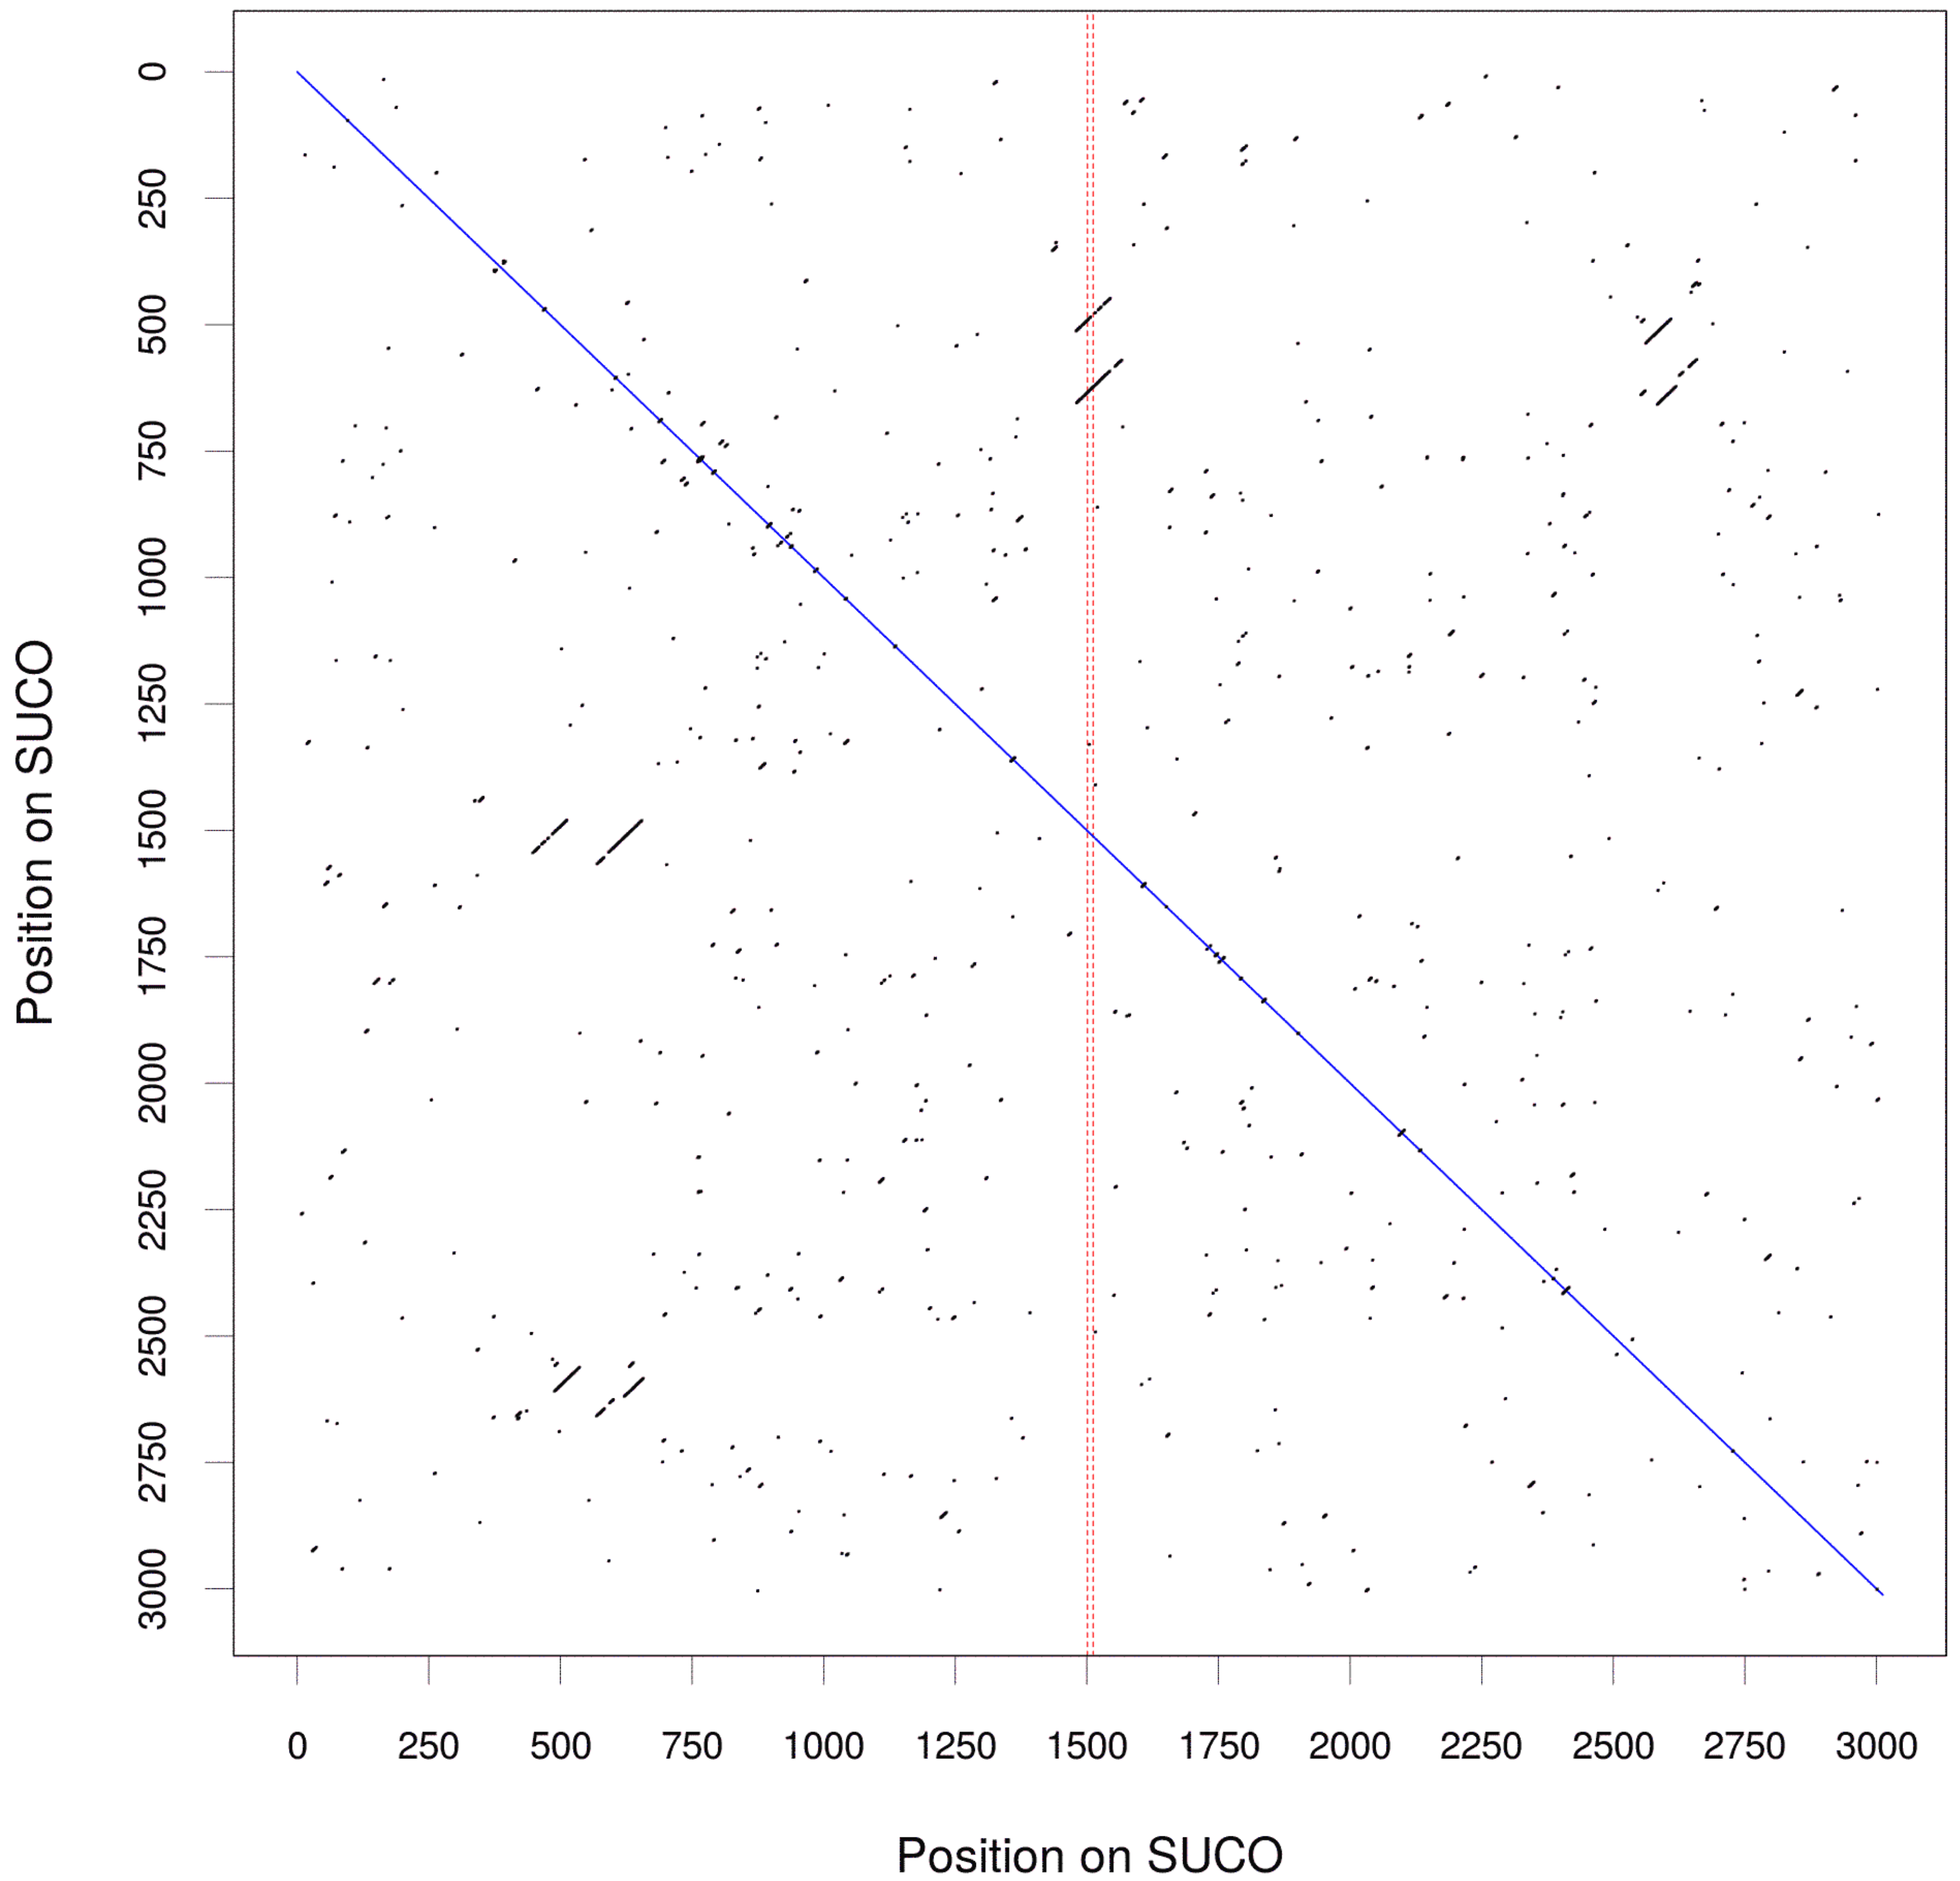

# SYNM

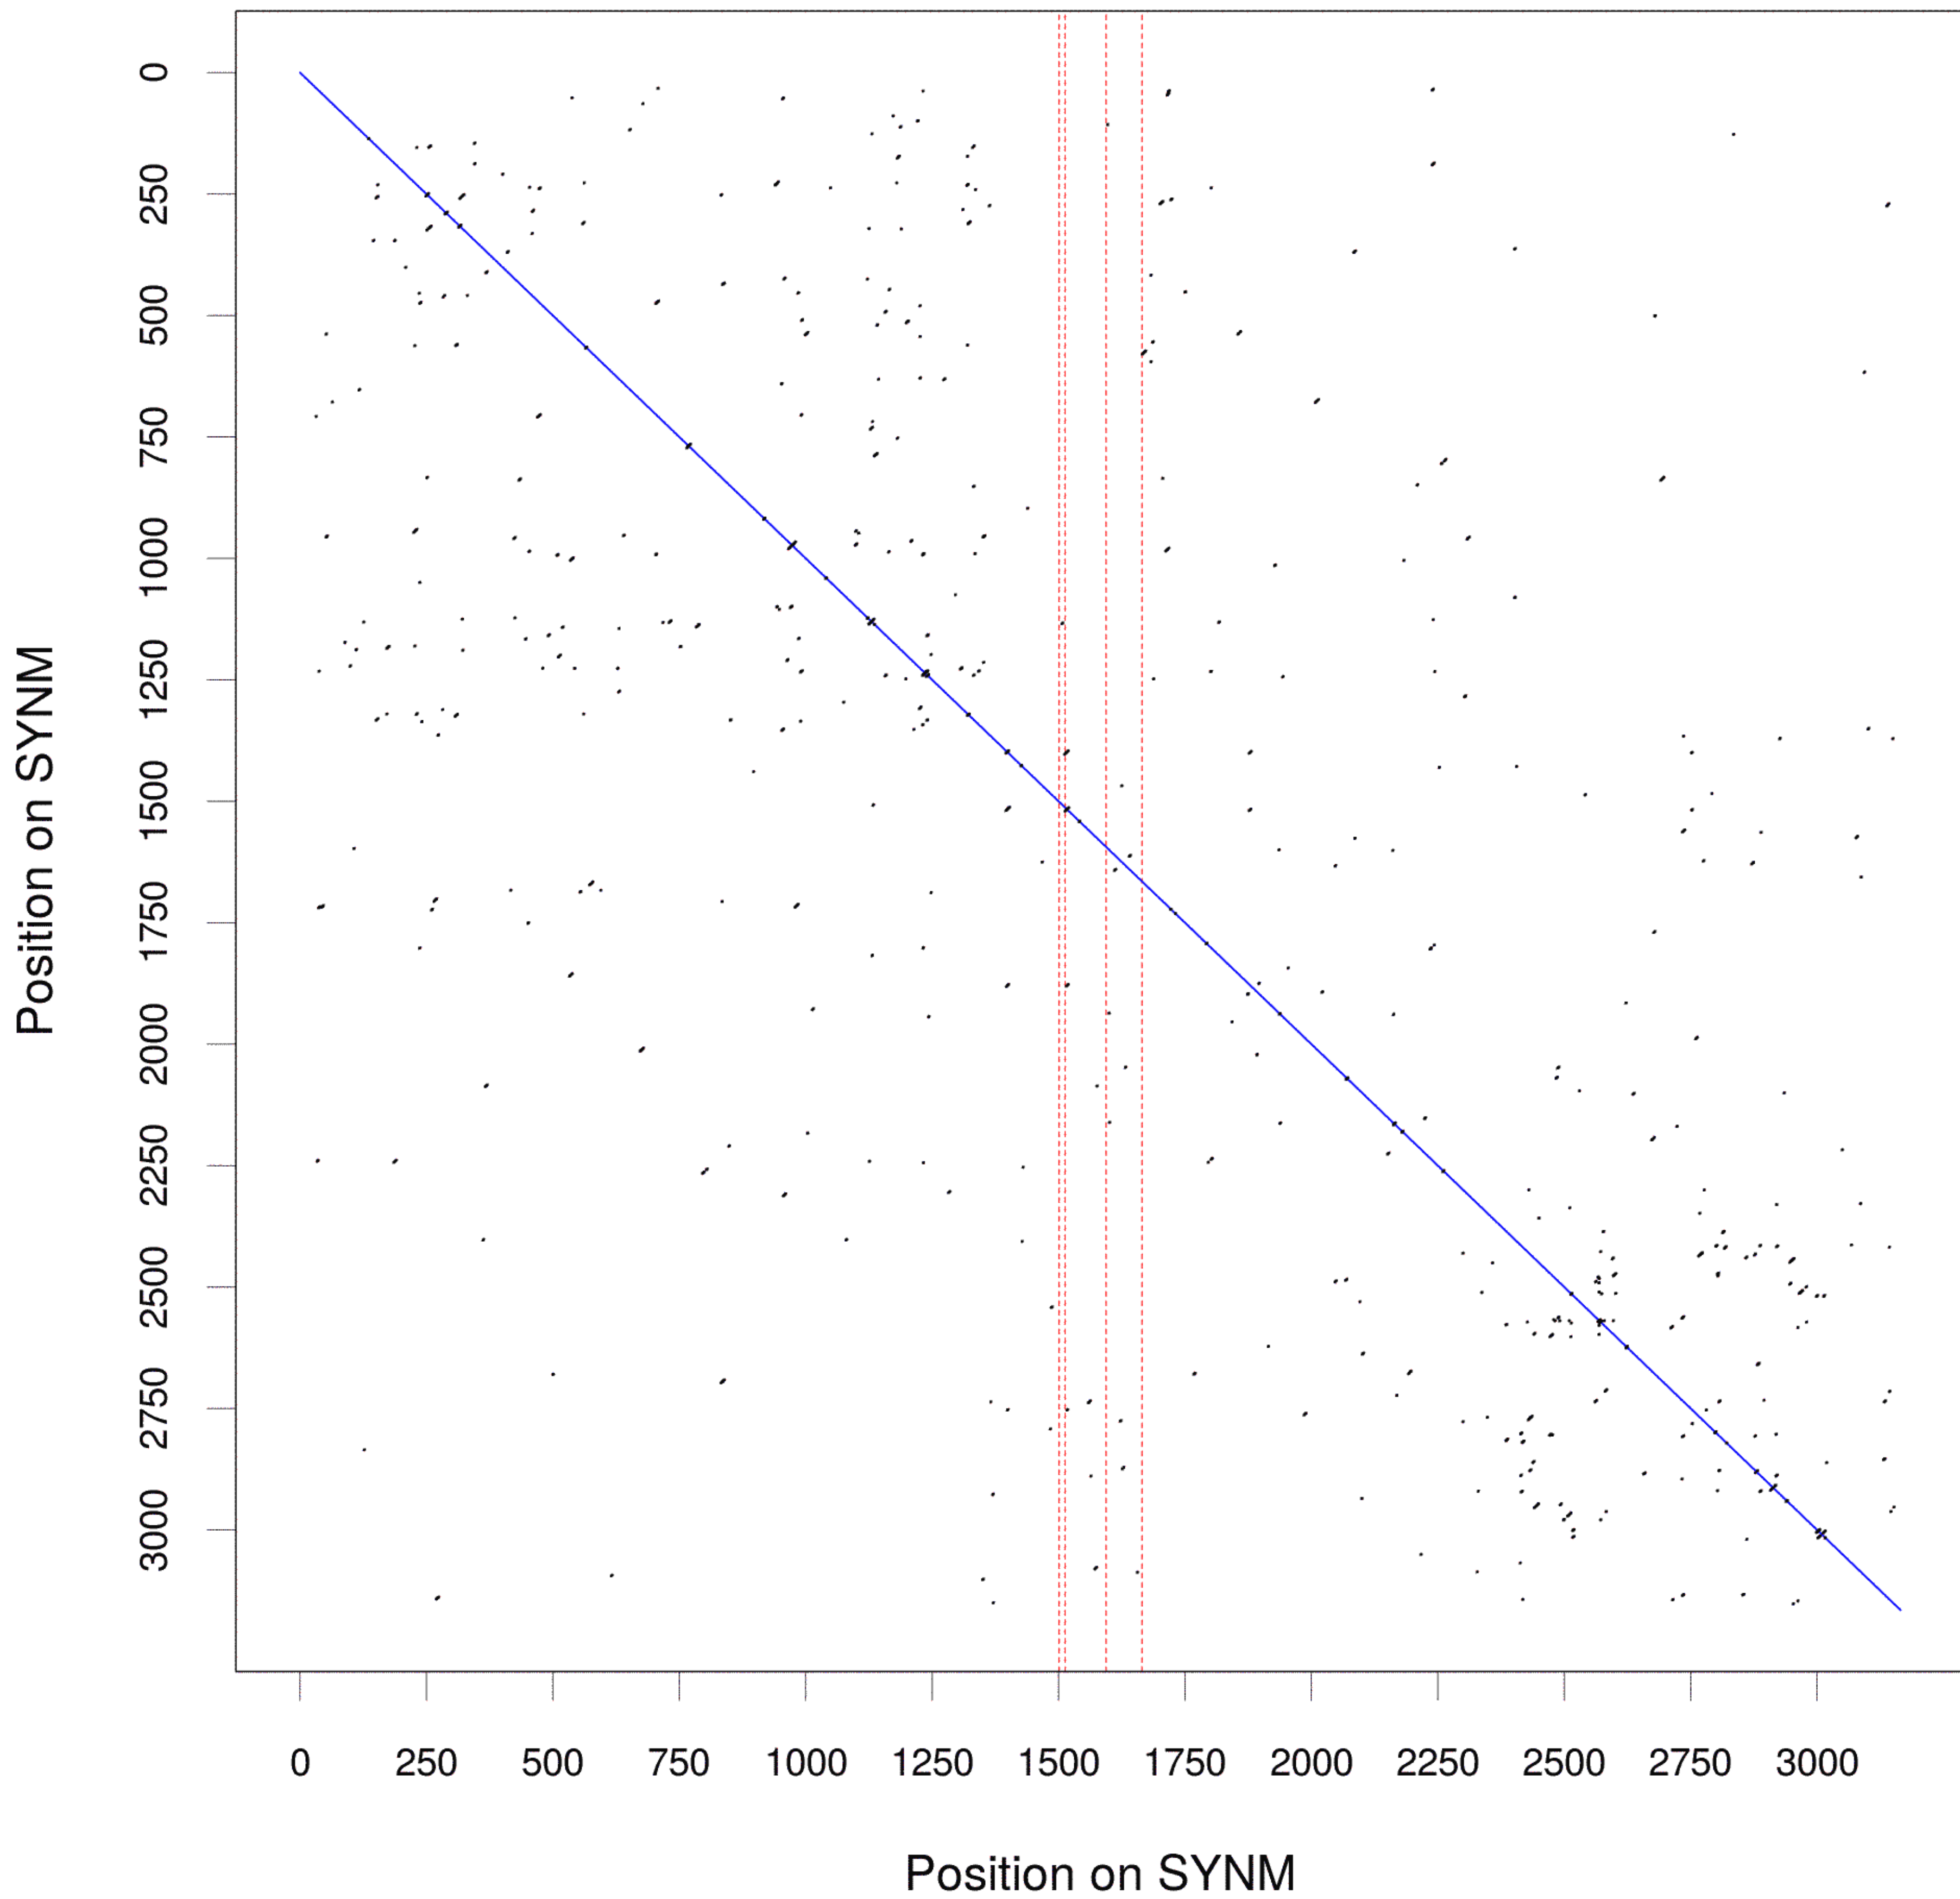

# TAGLN2

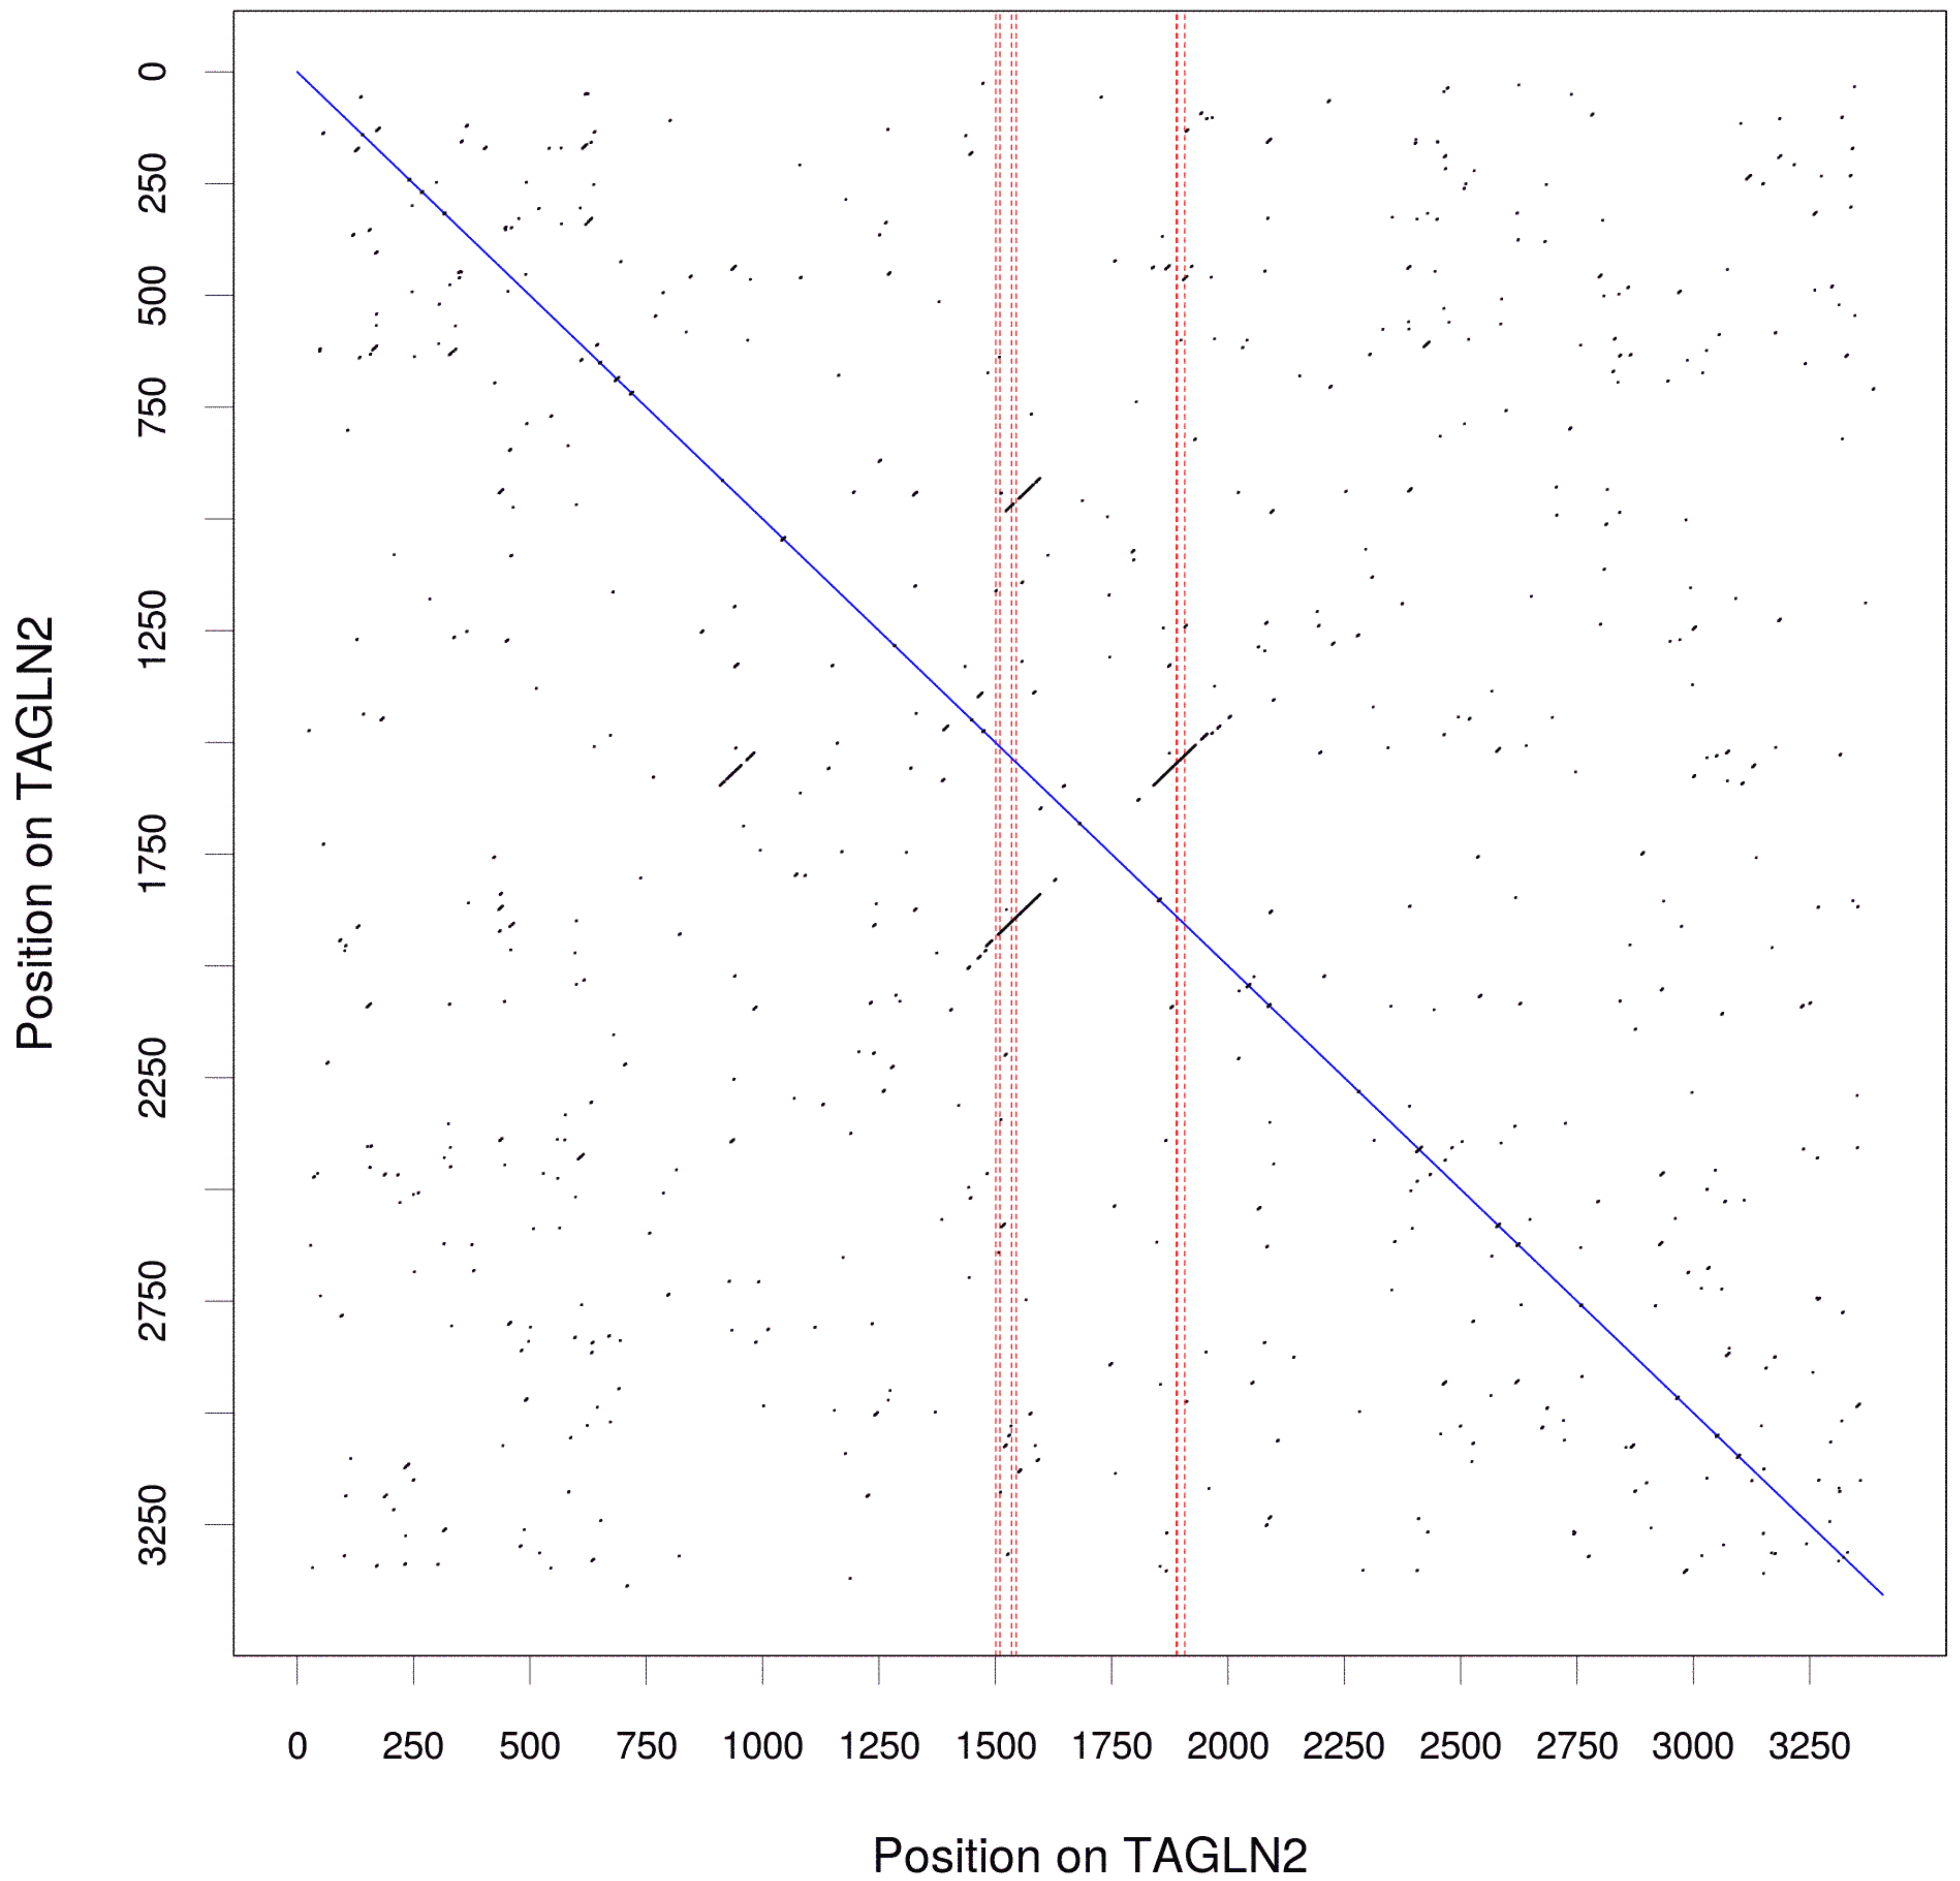



# TARBP1

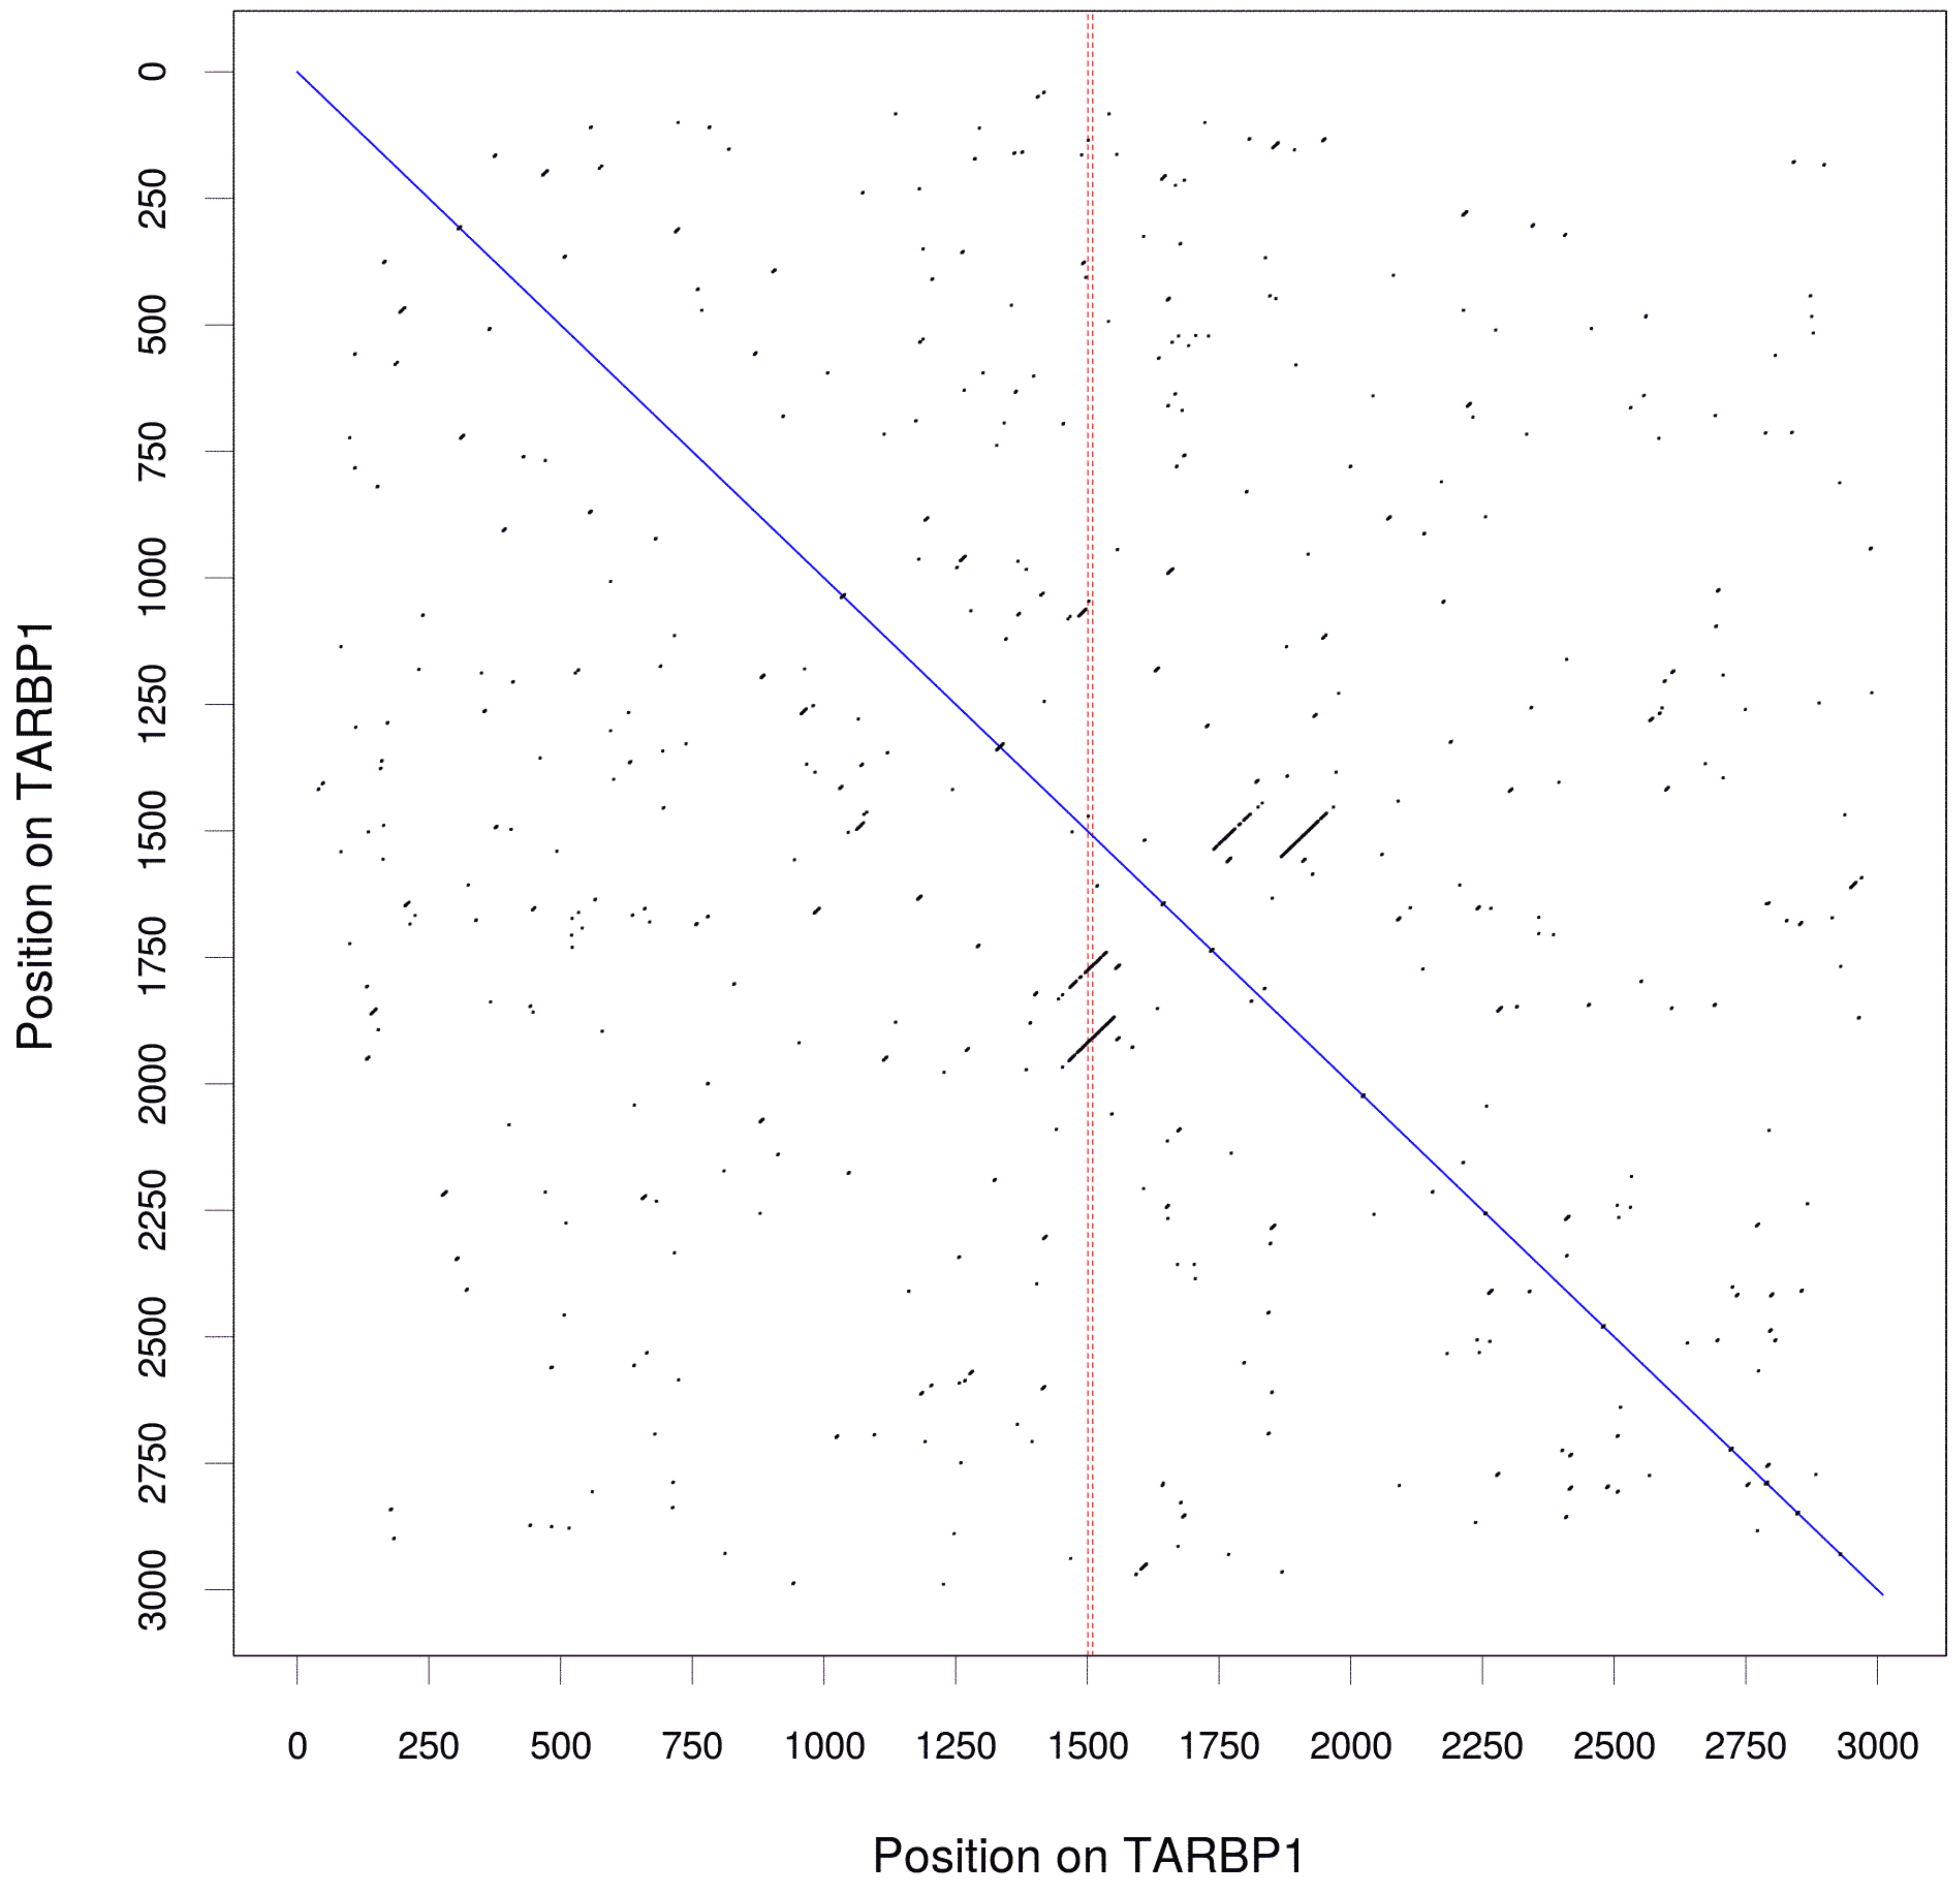

# TCN2

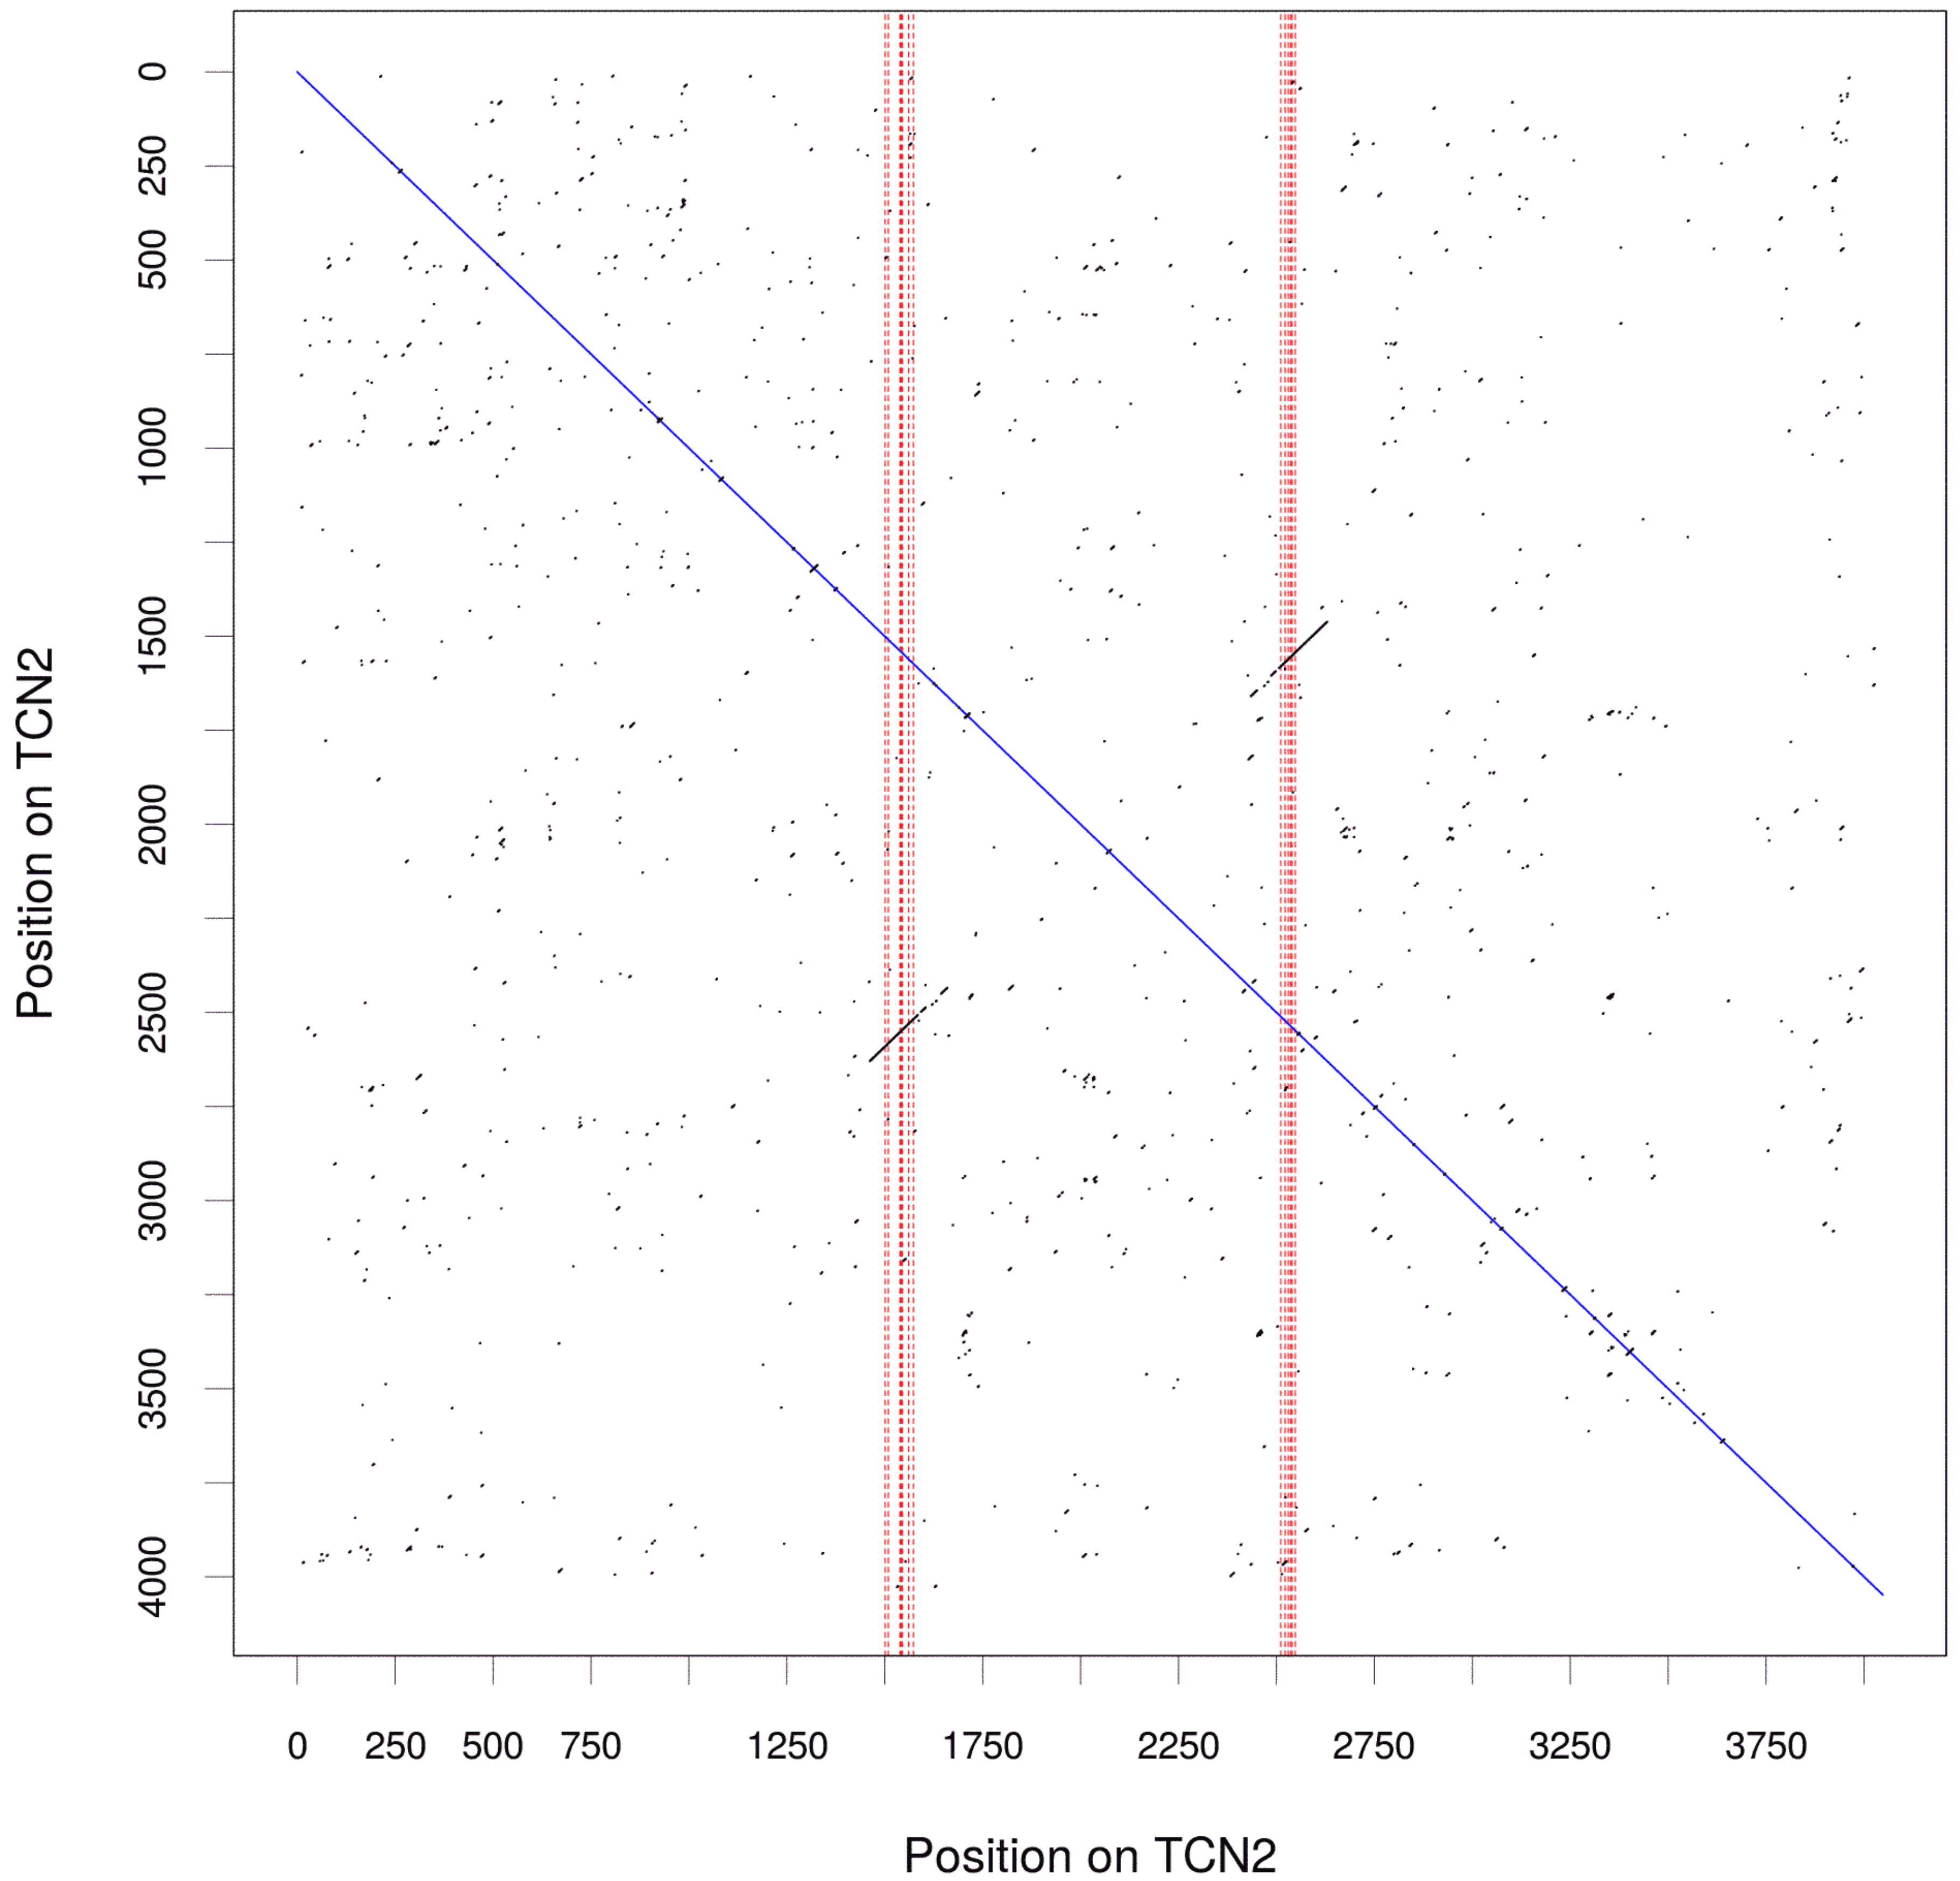

# TEX10

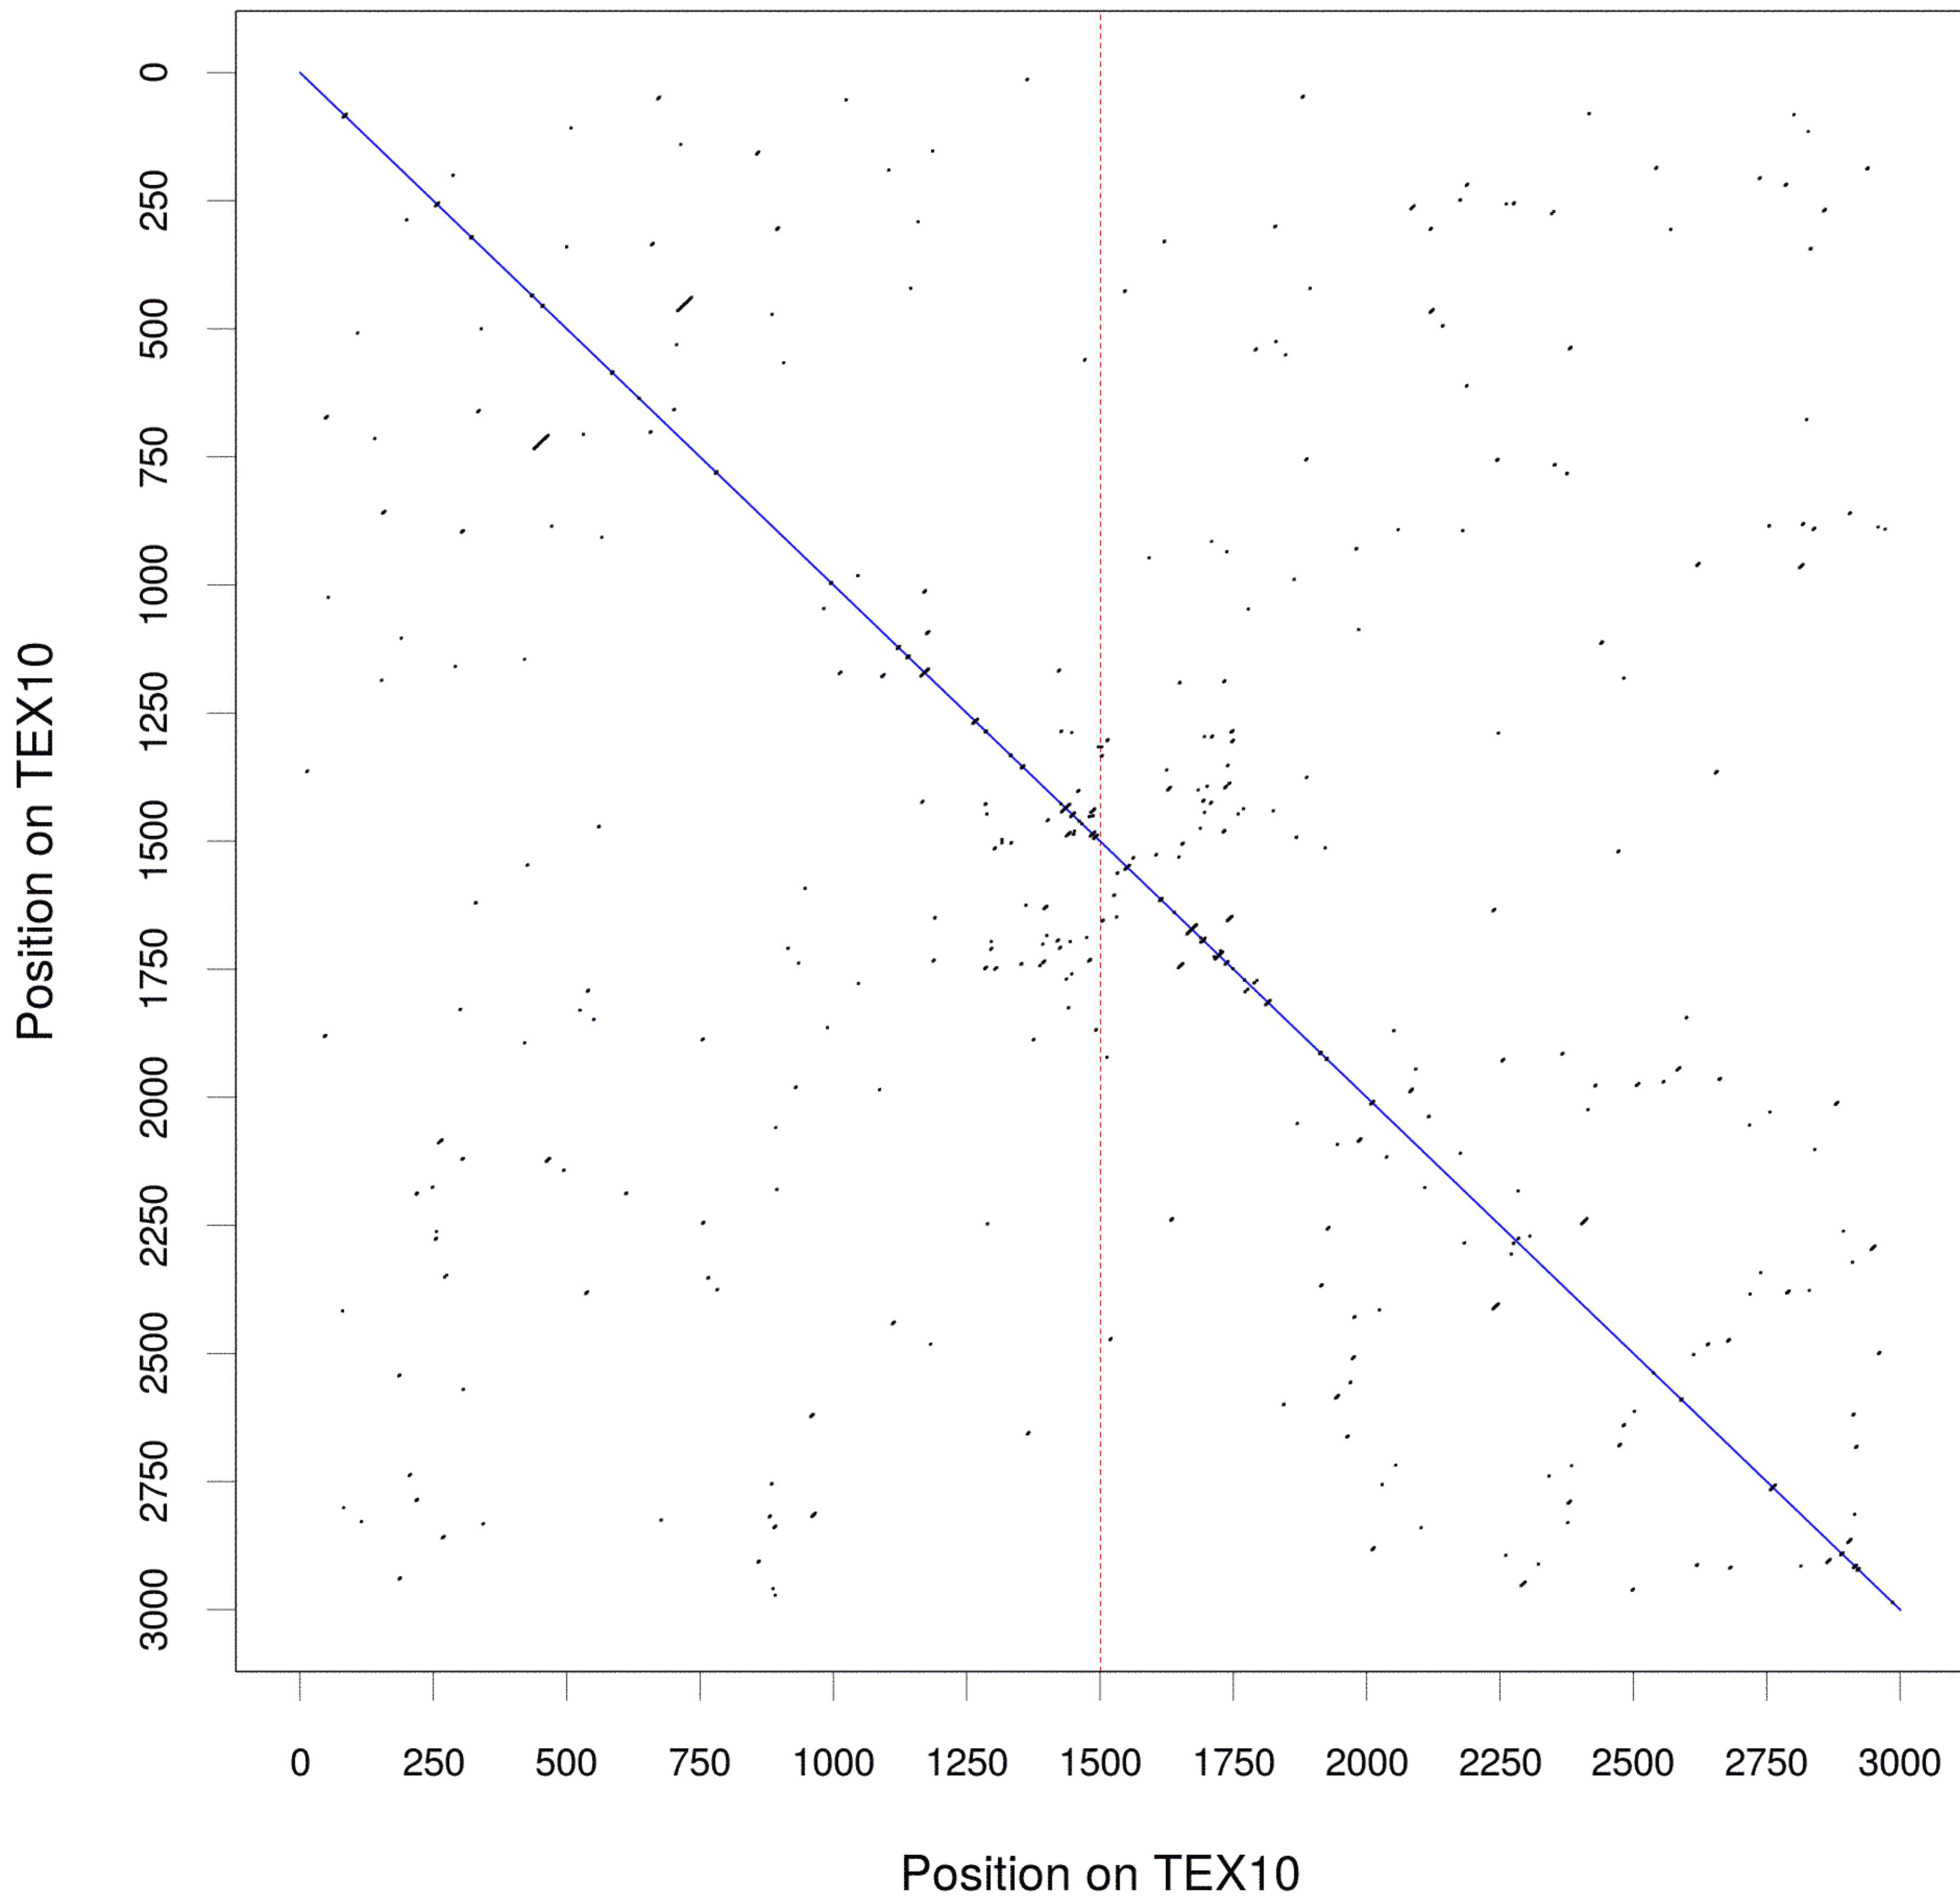

# TIMMDC1

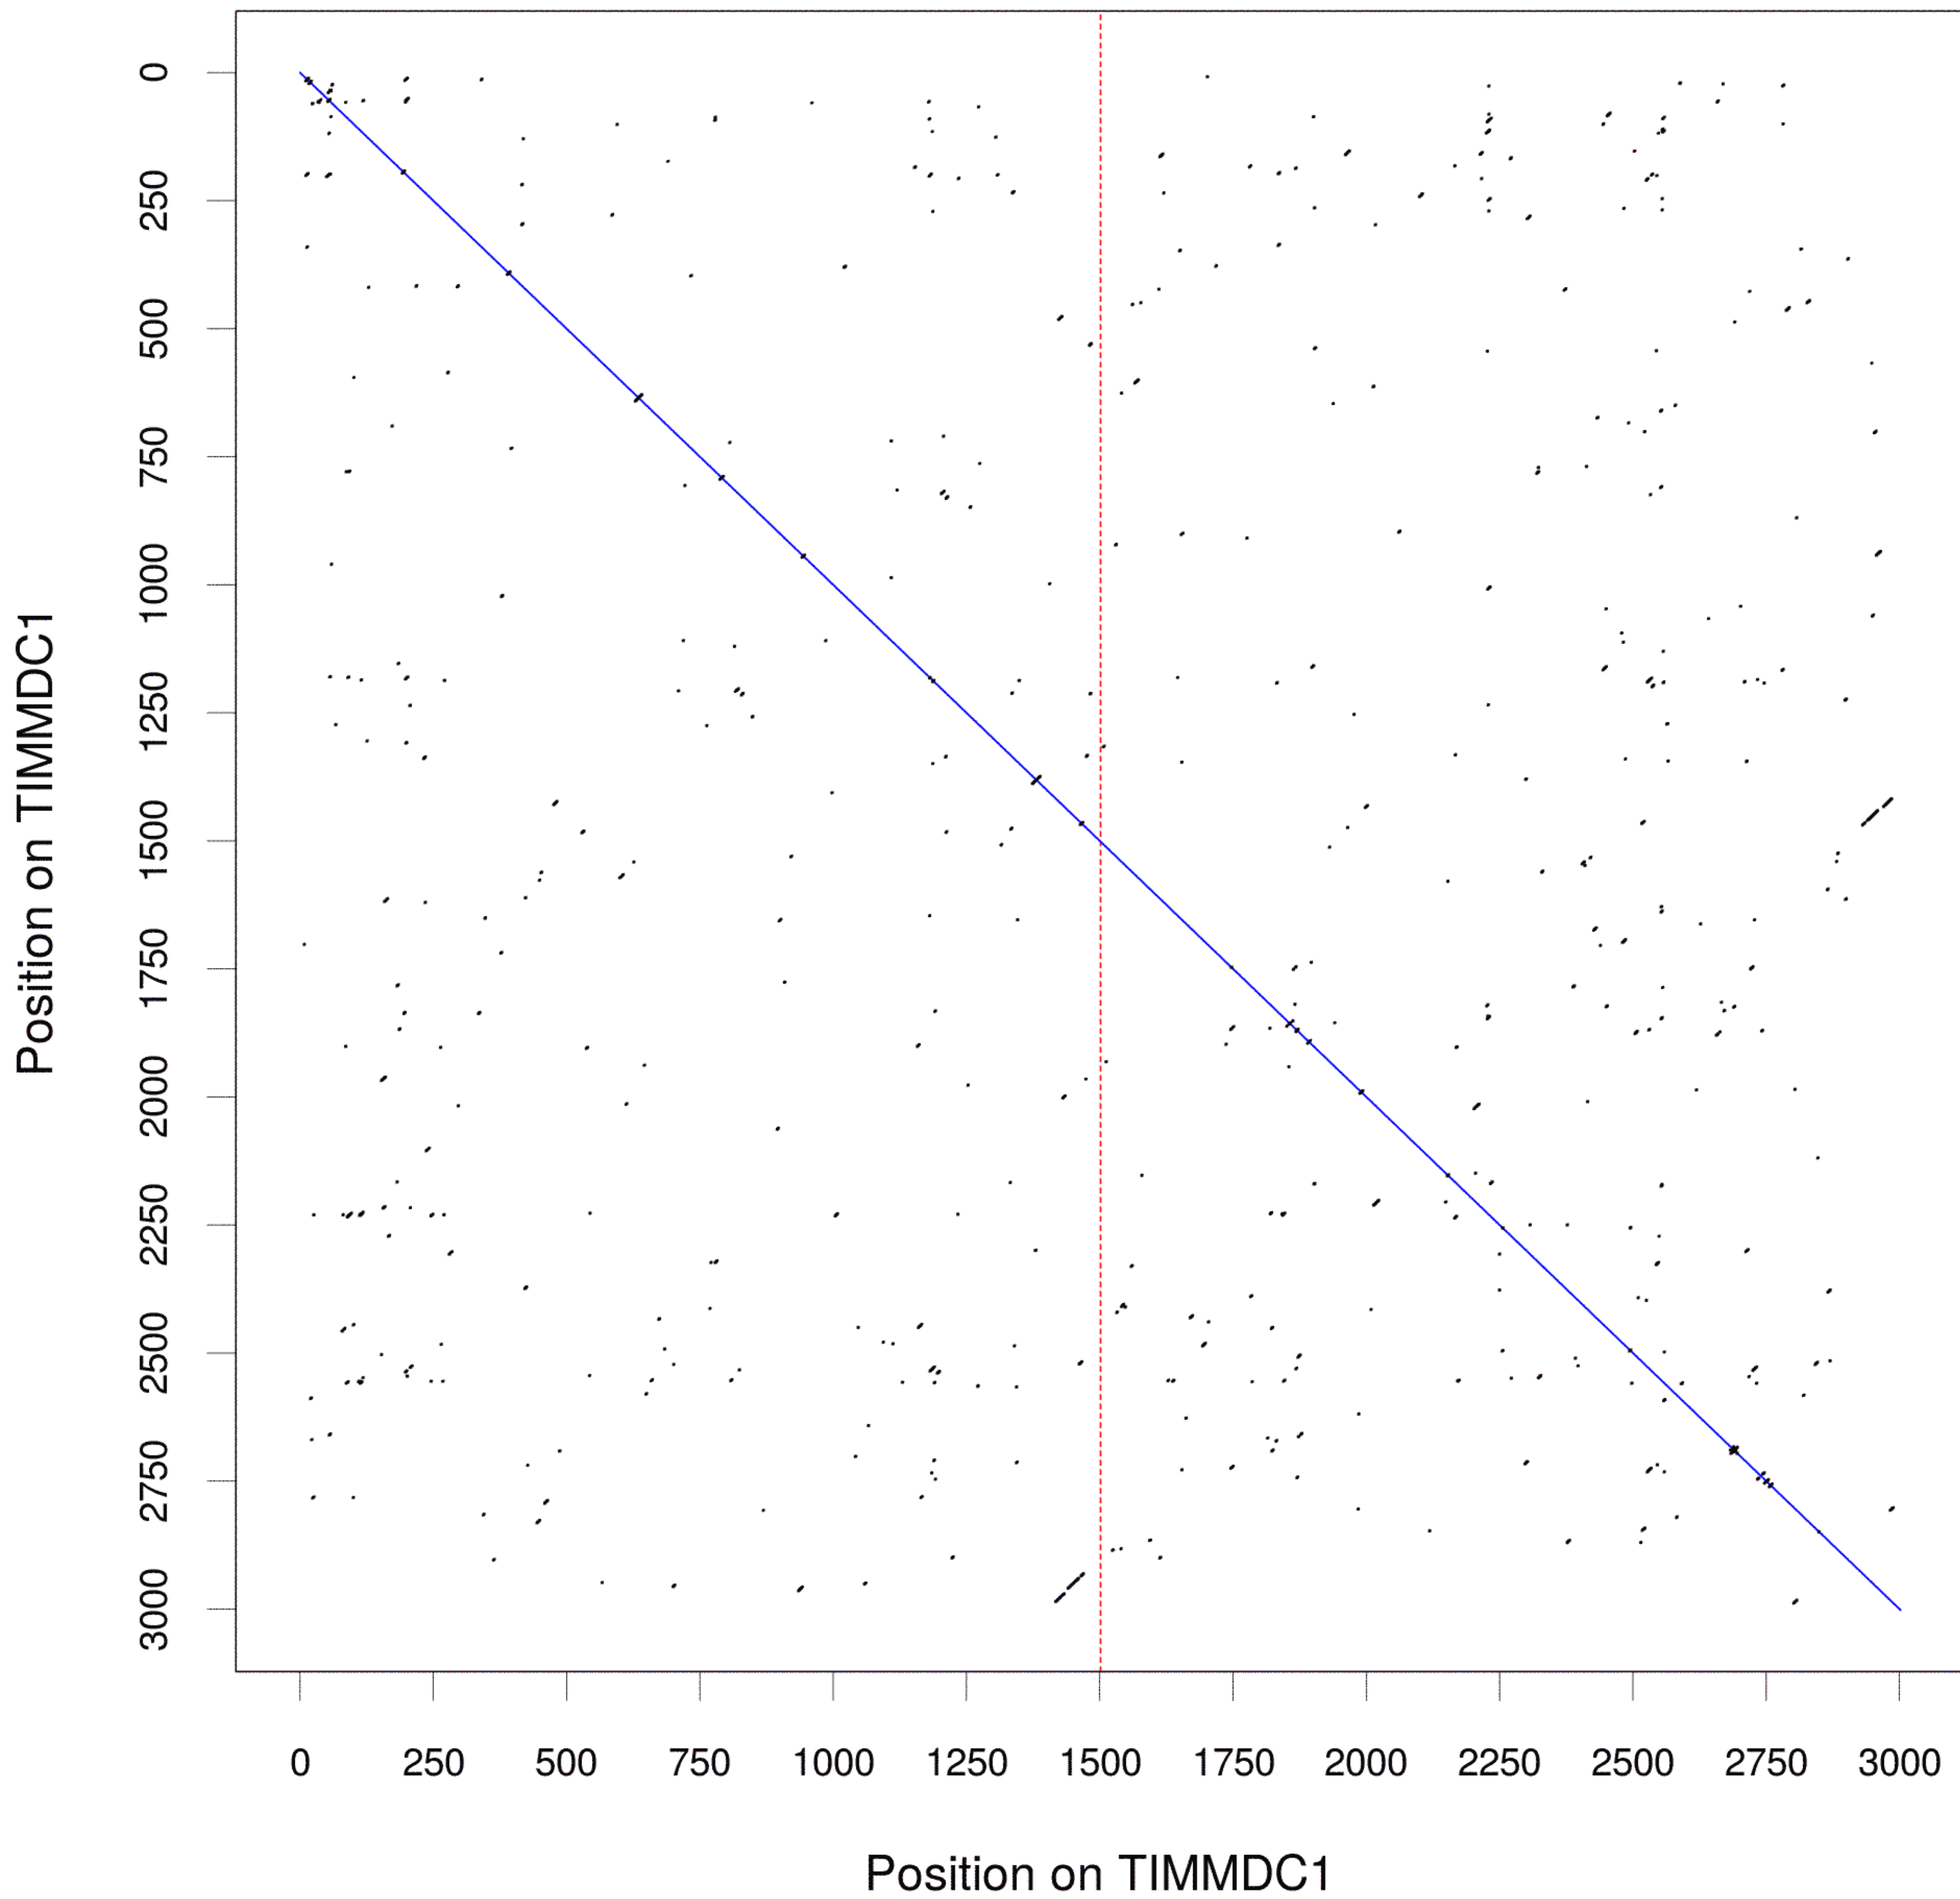

# TJP3

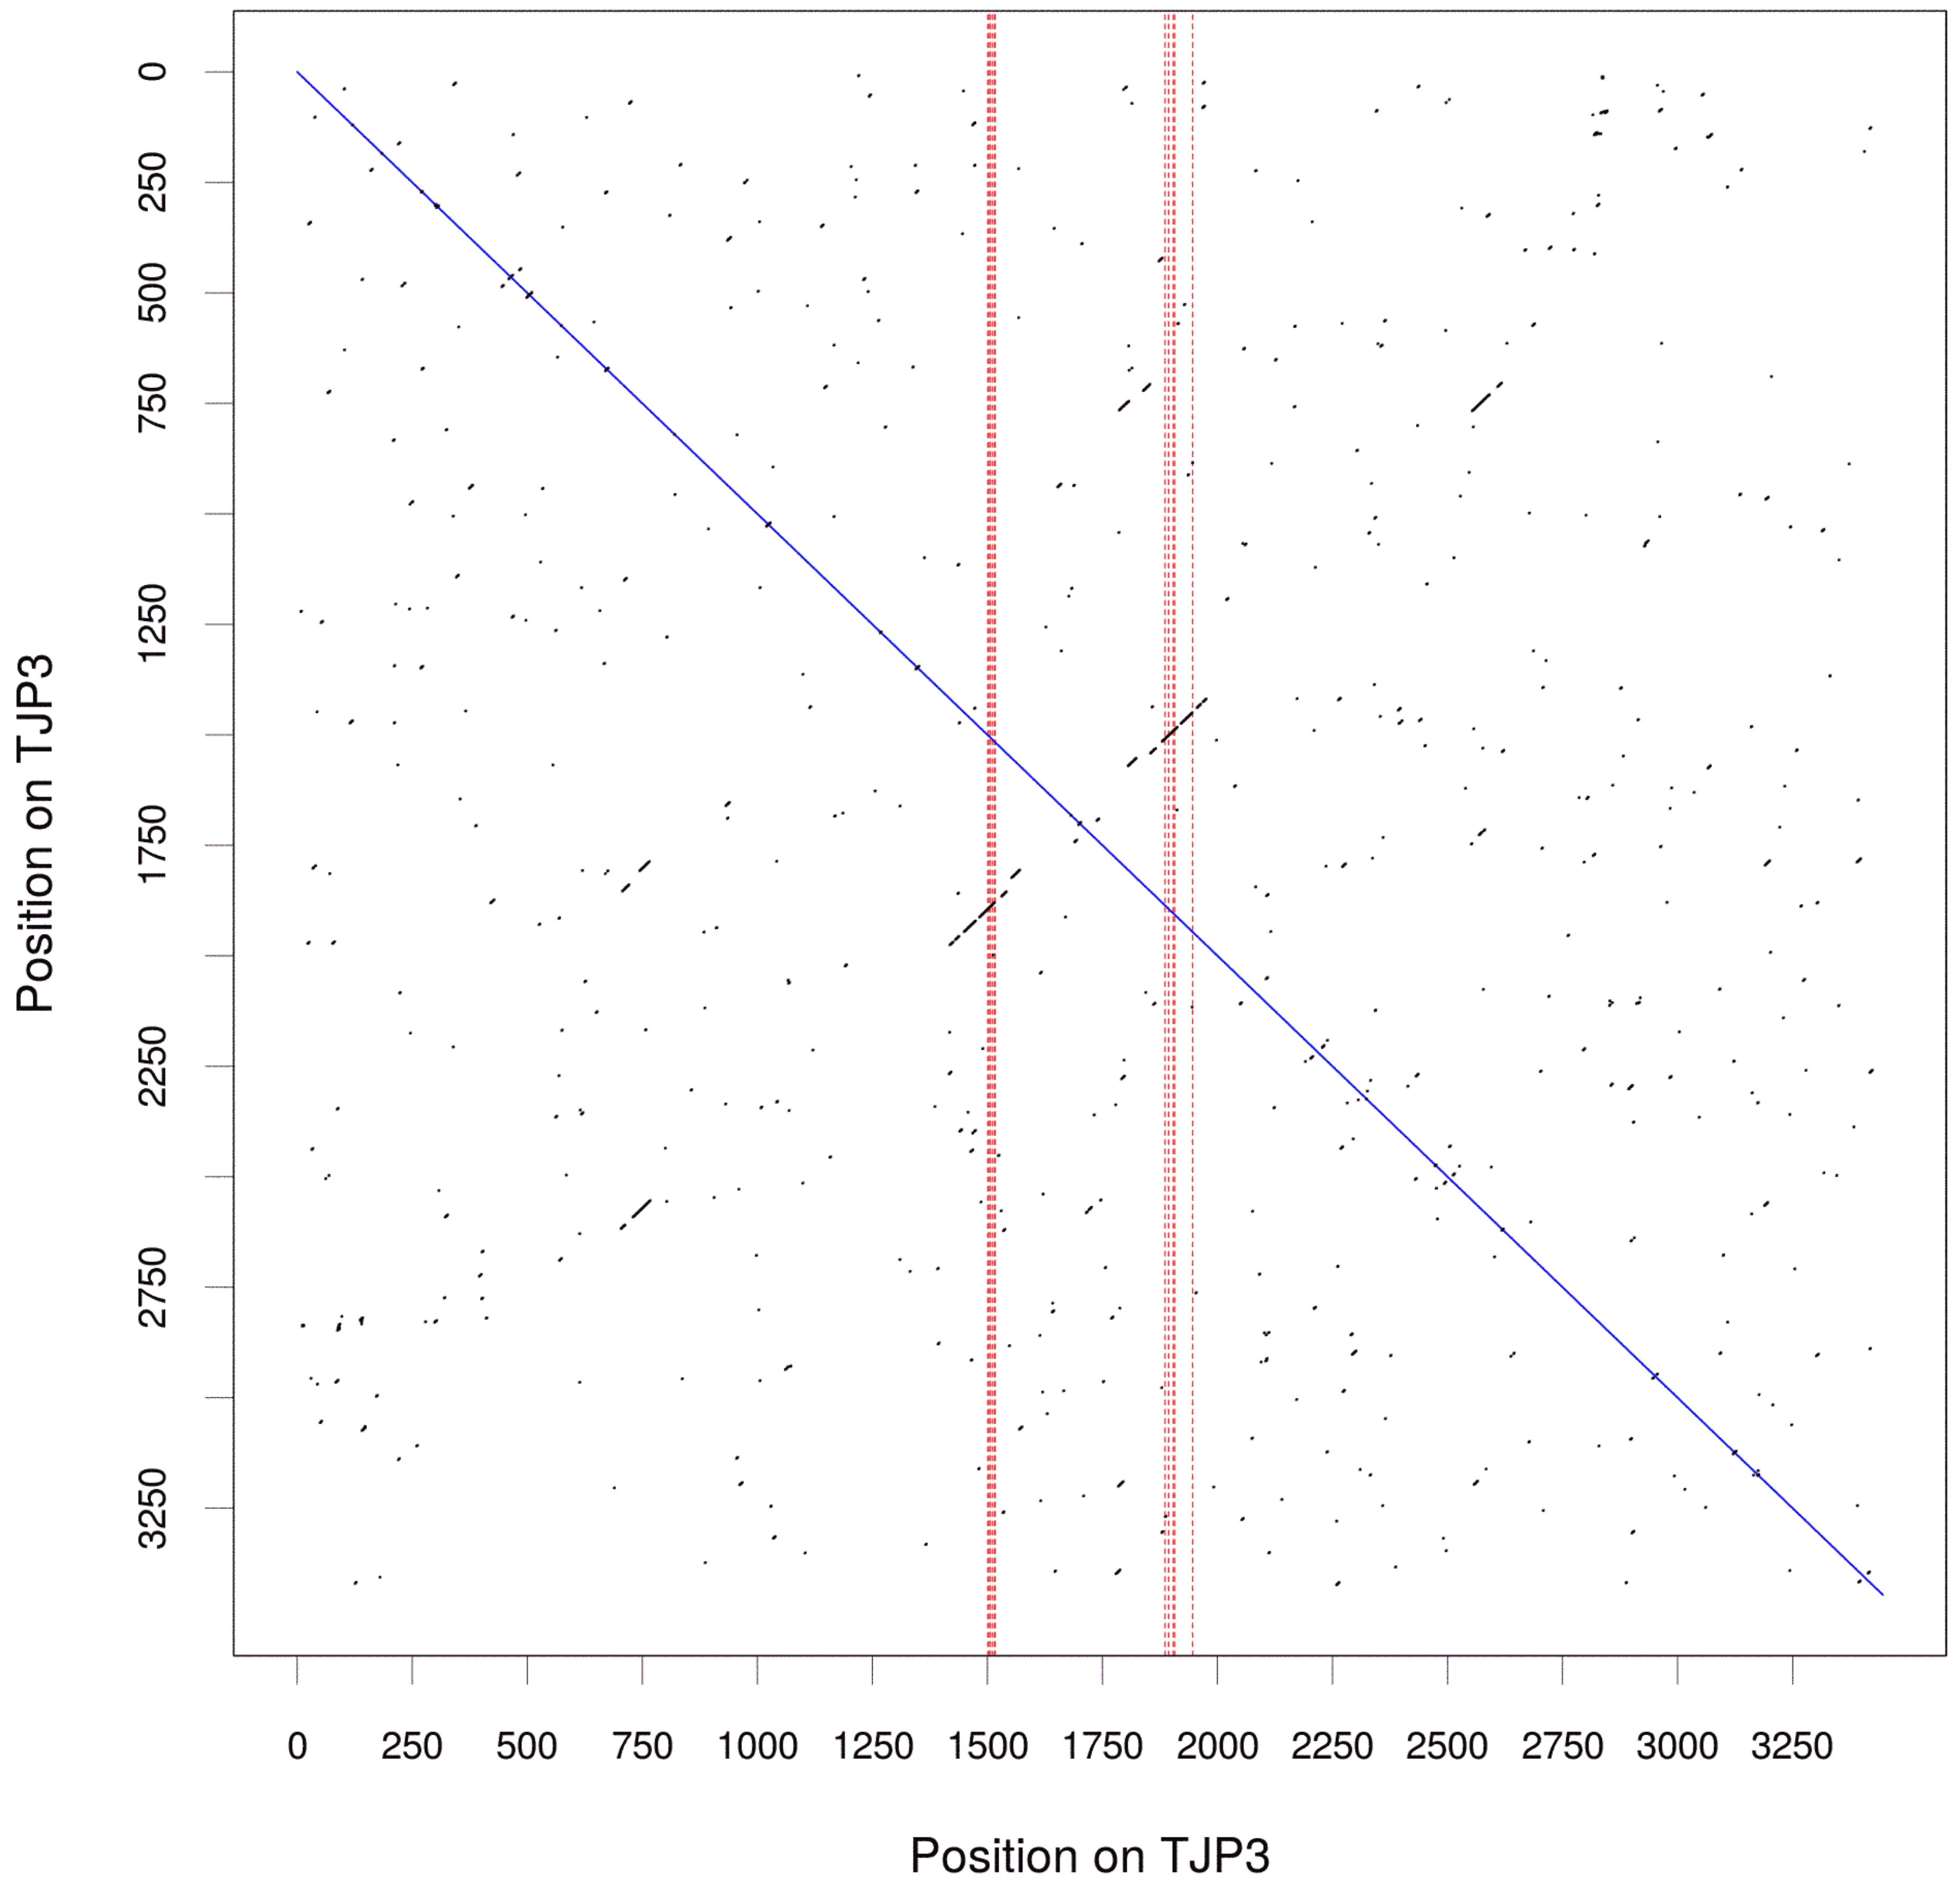

# TMA16

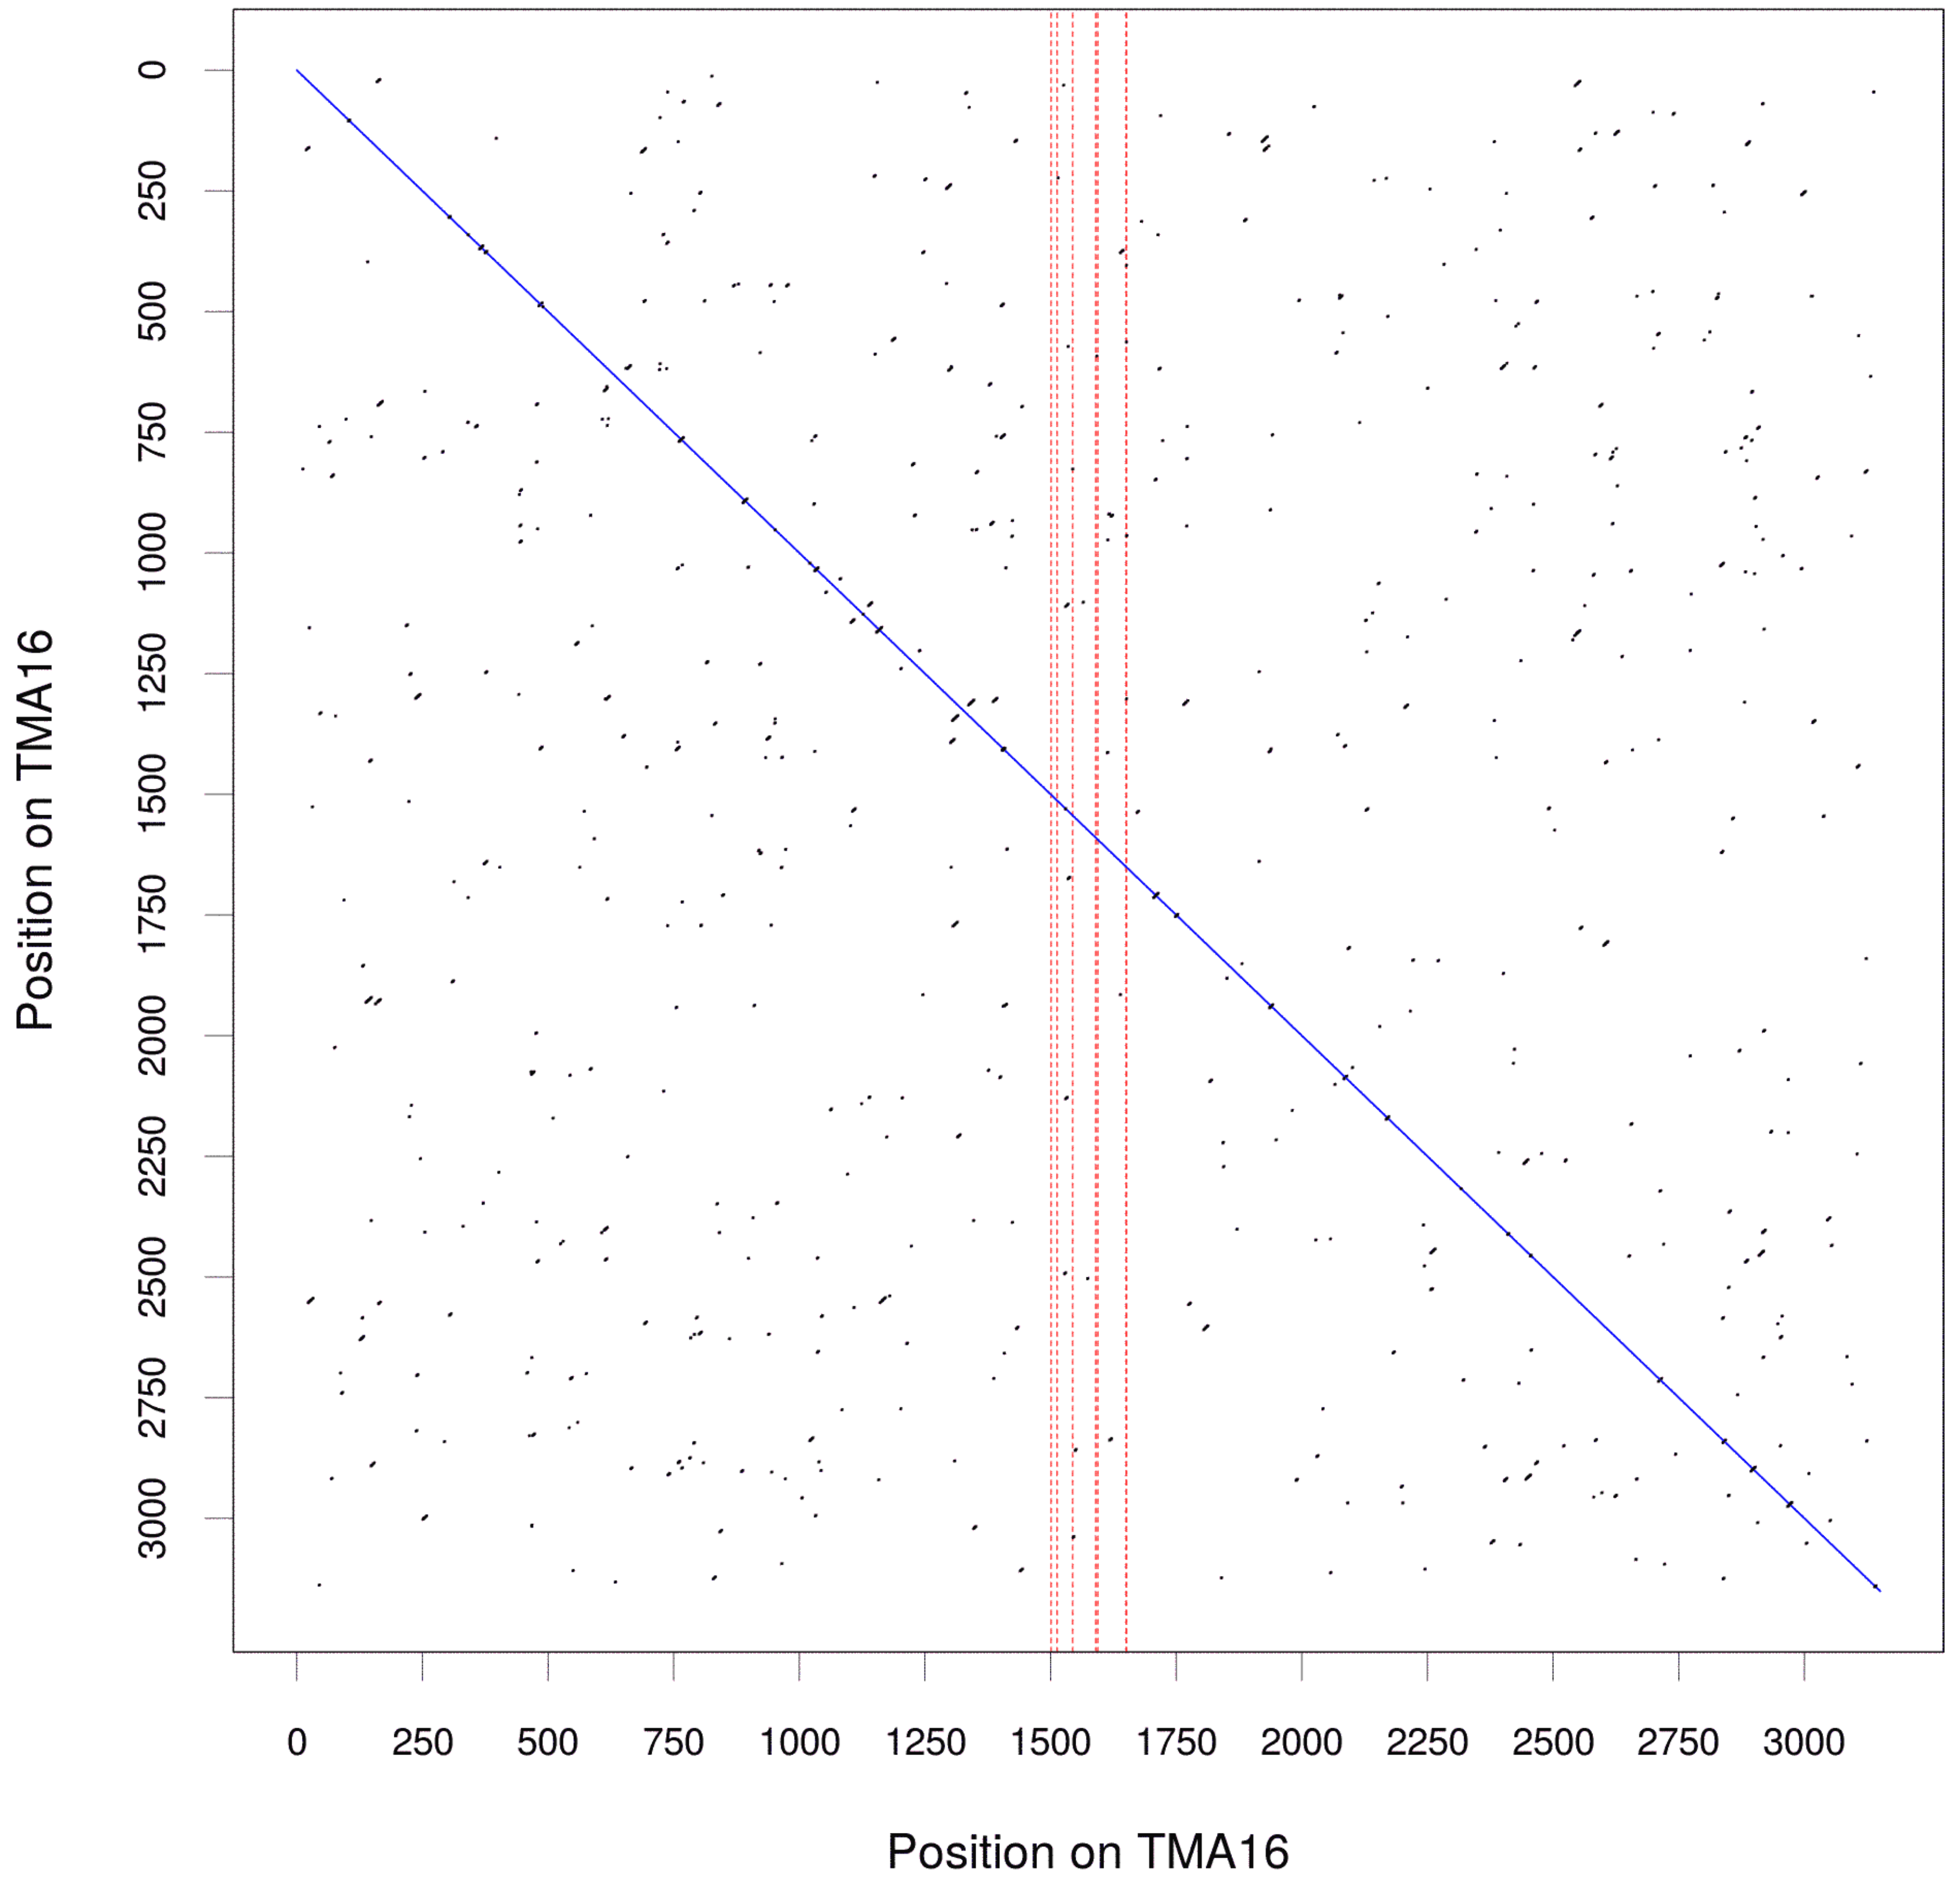

# TMED2

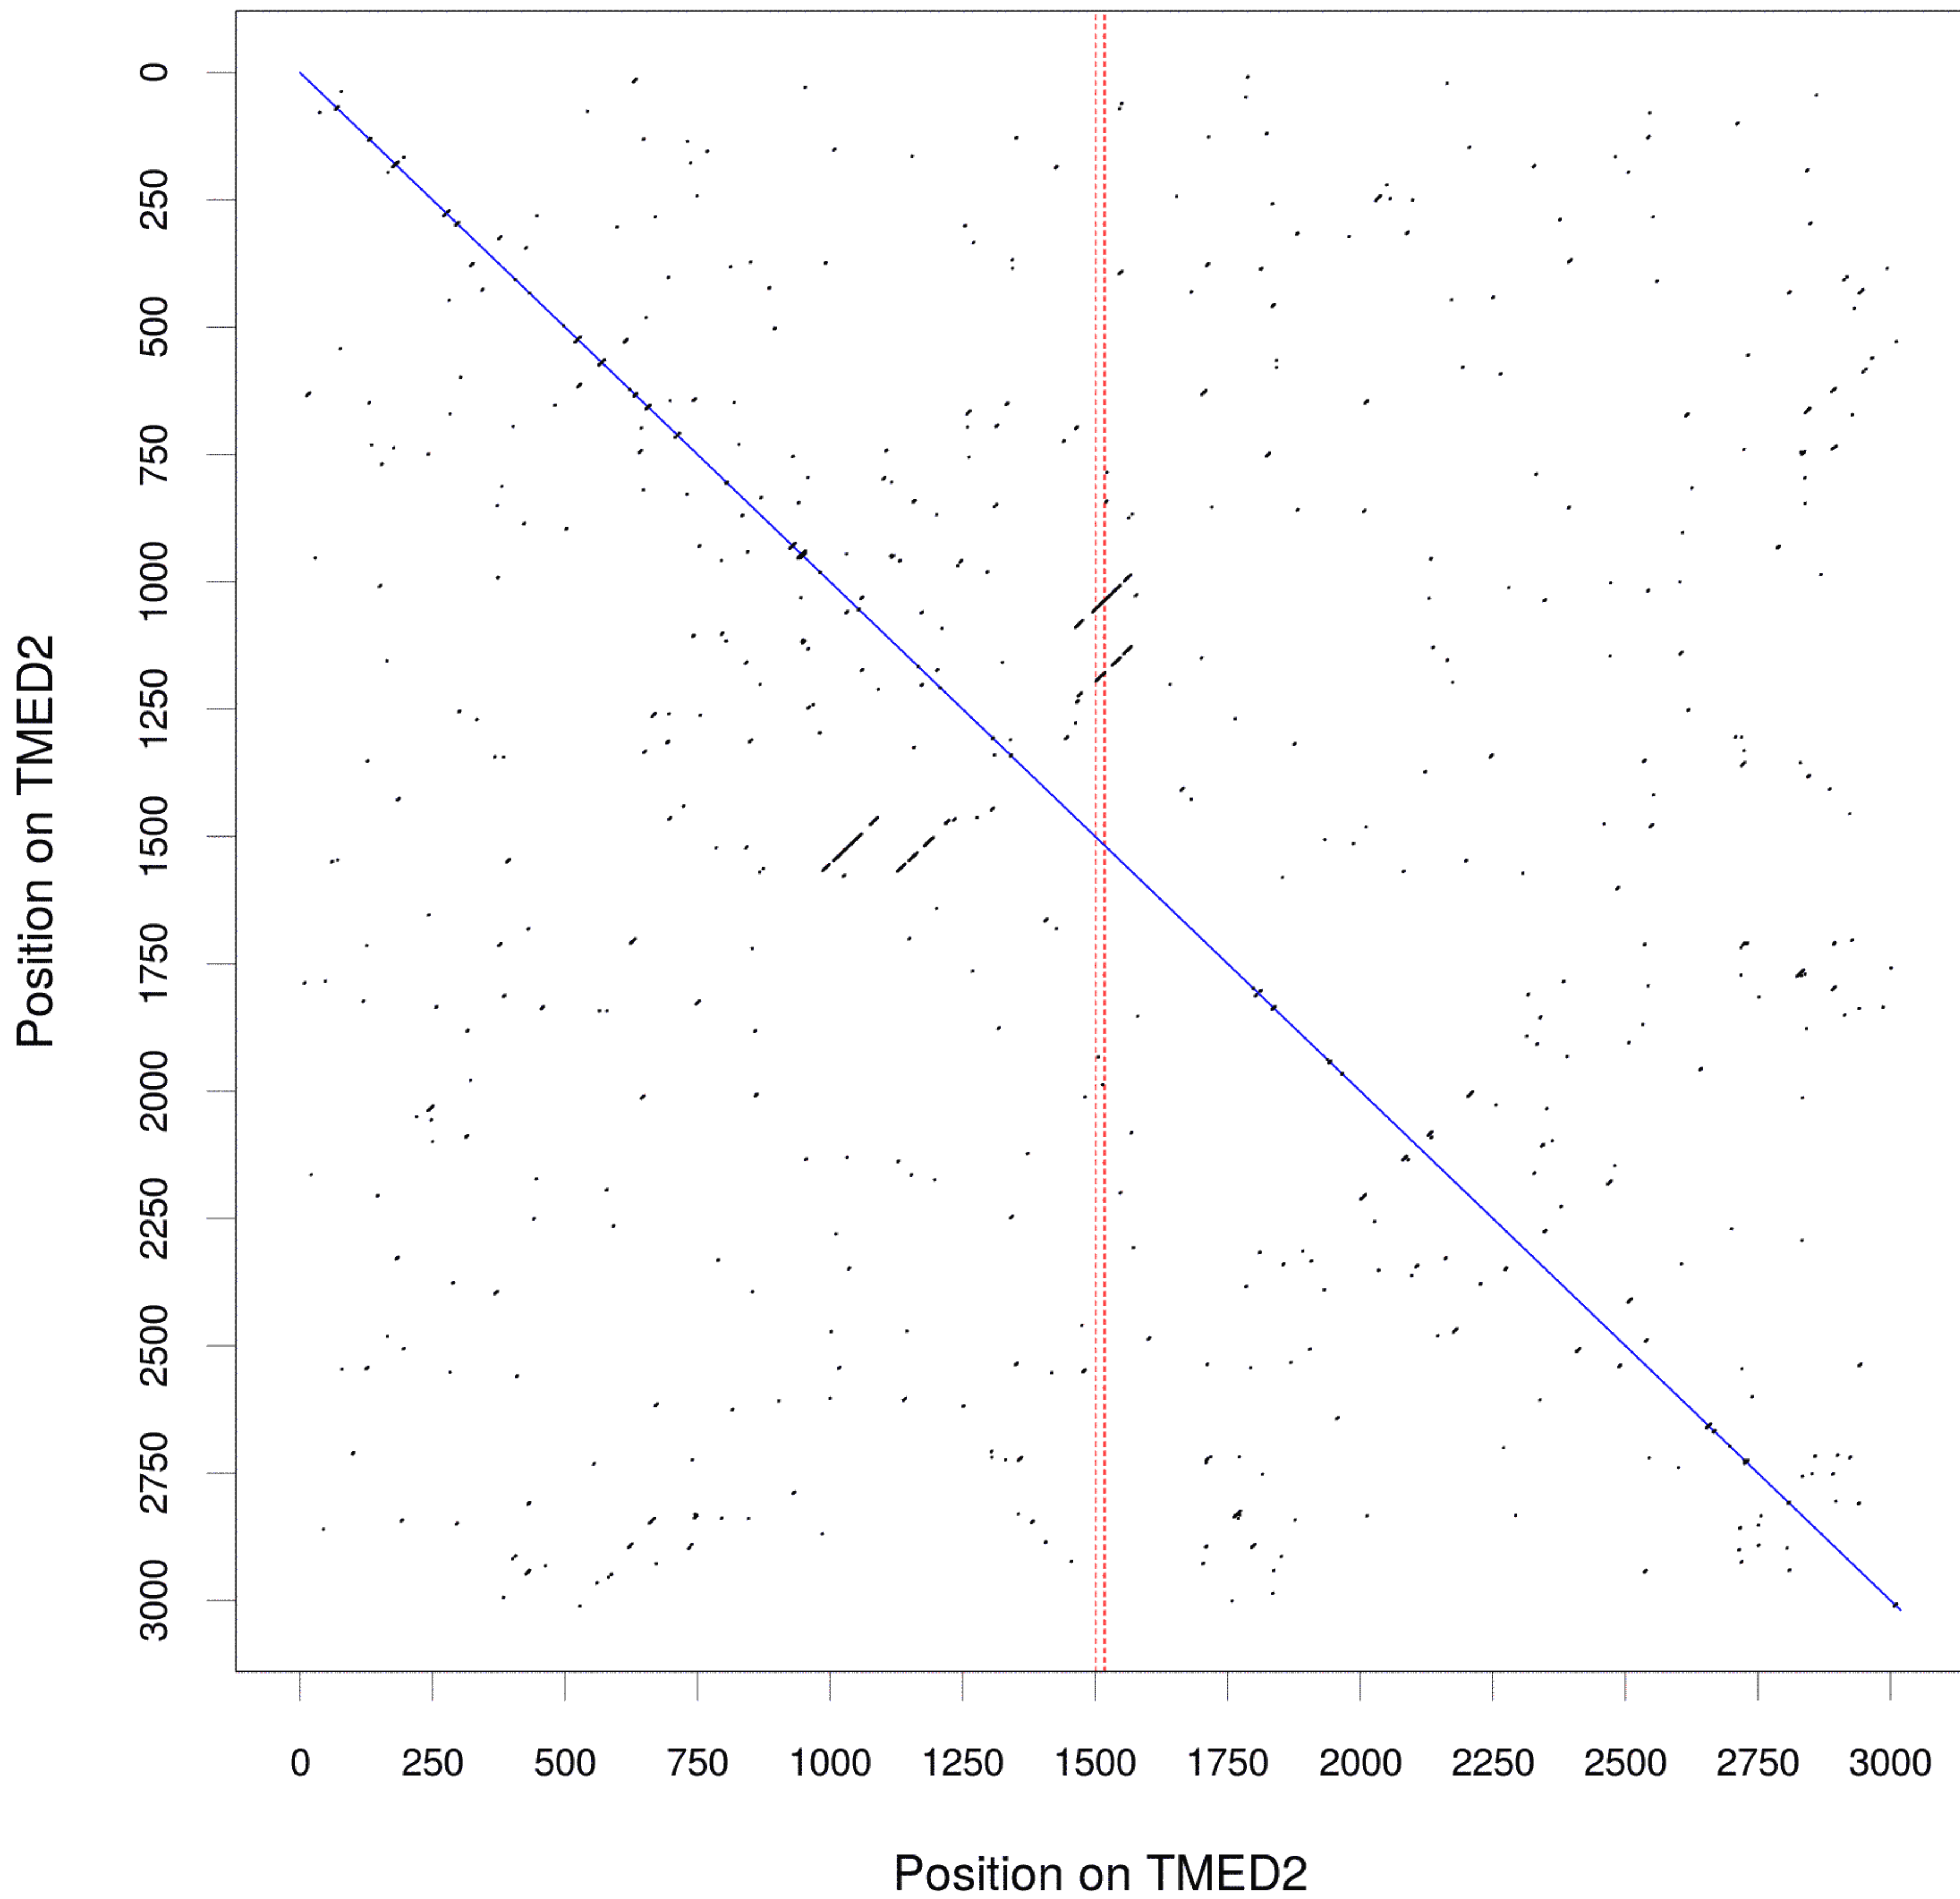

# TMEM63A

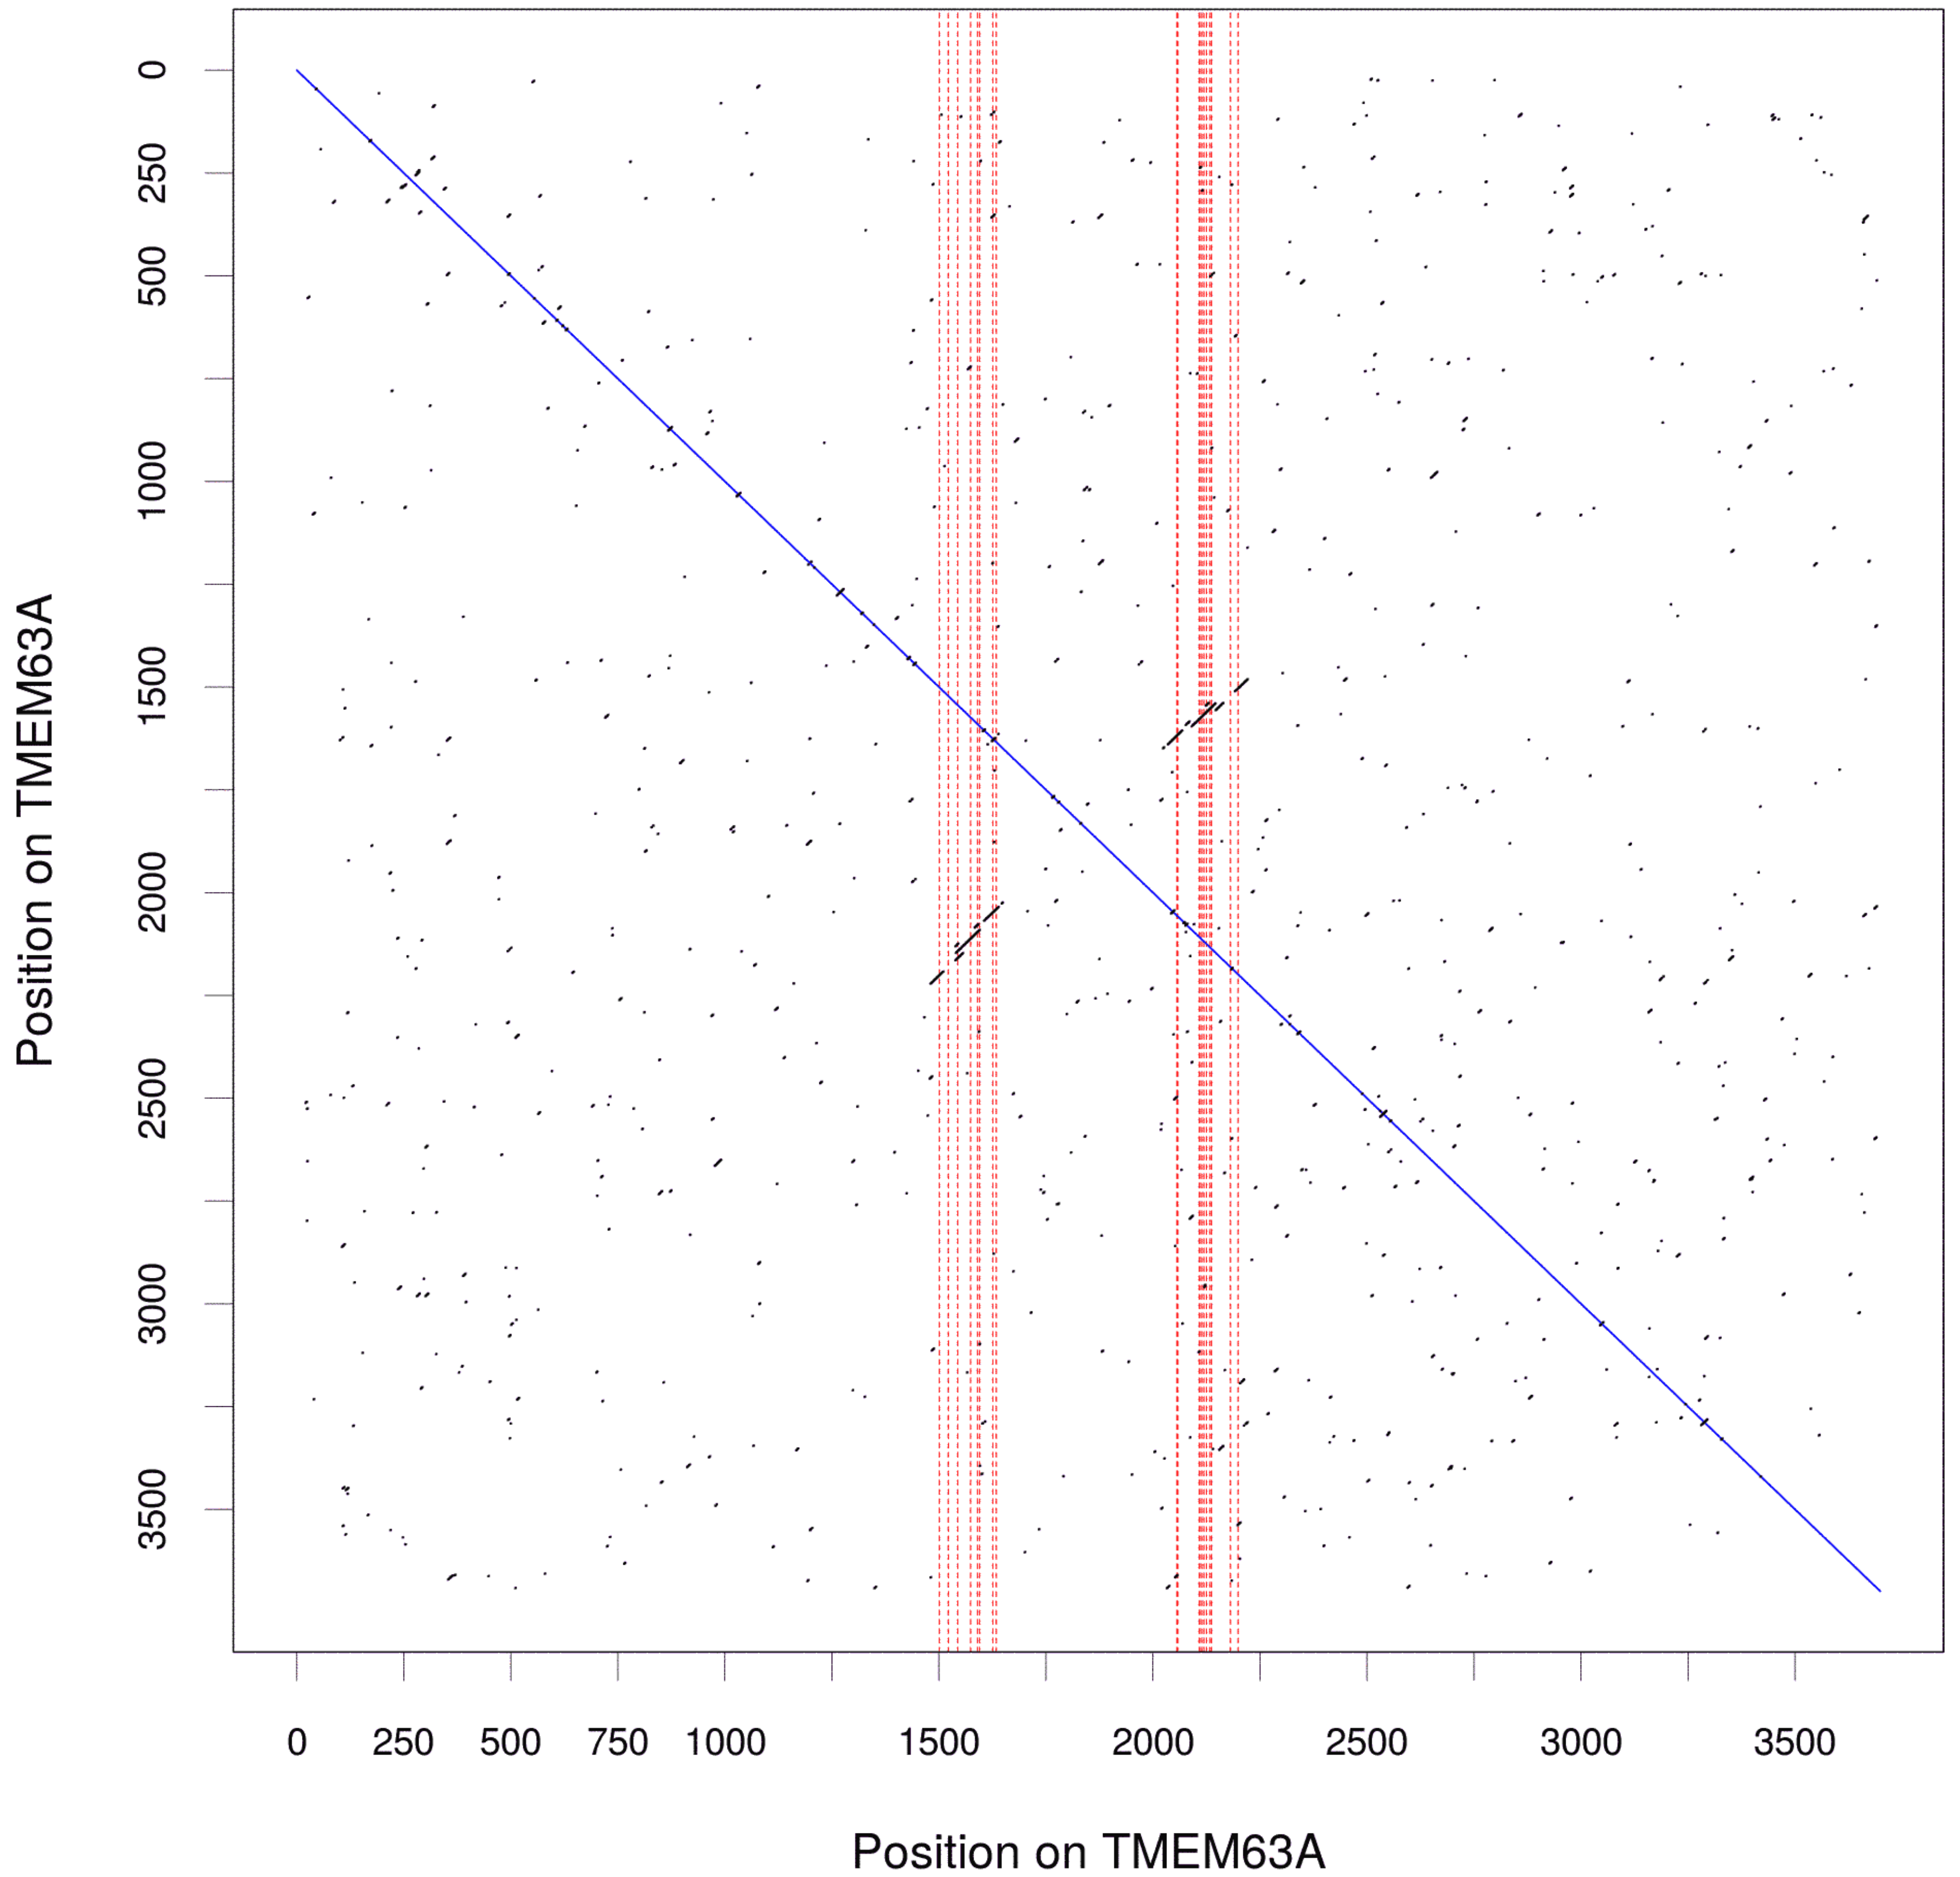



# TMEM68

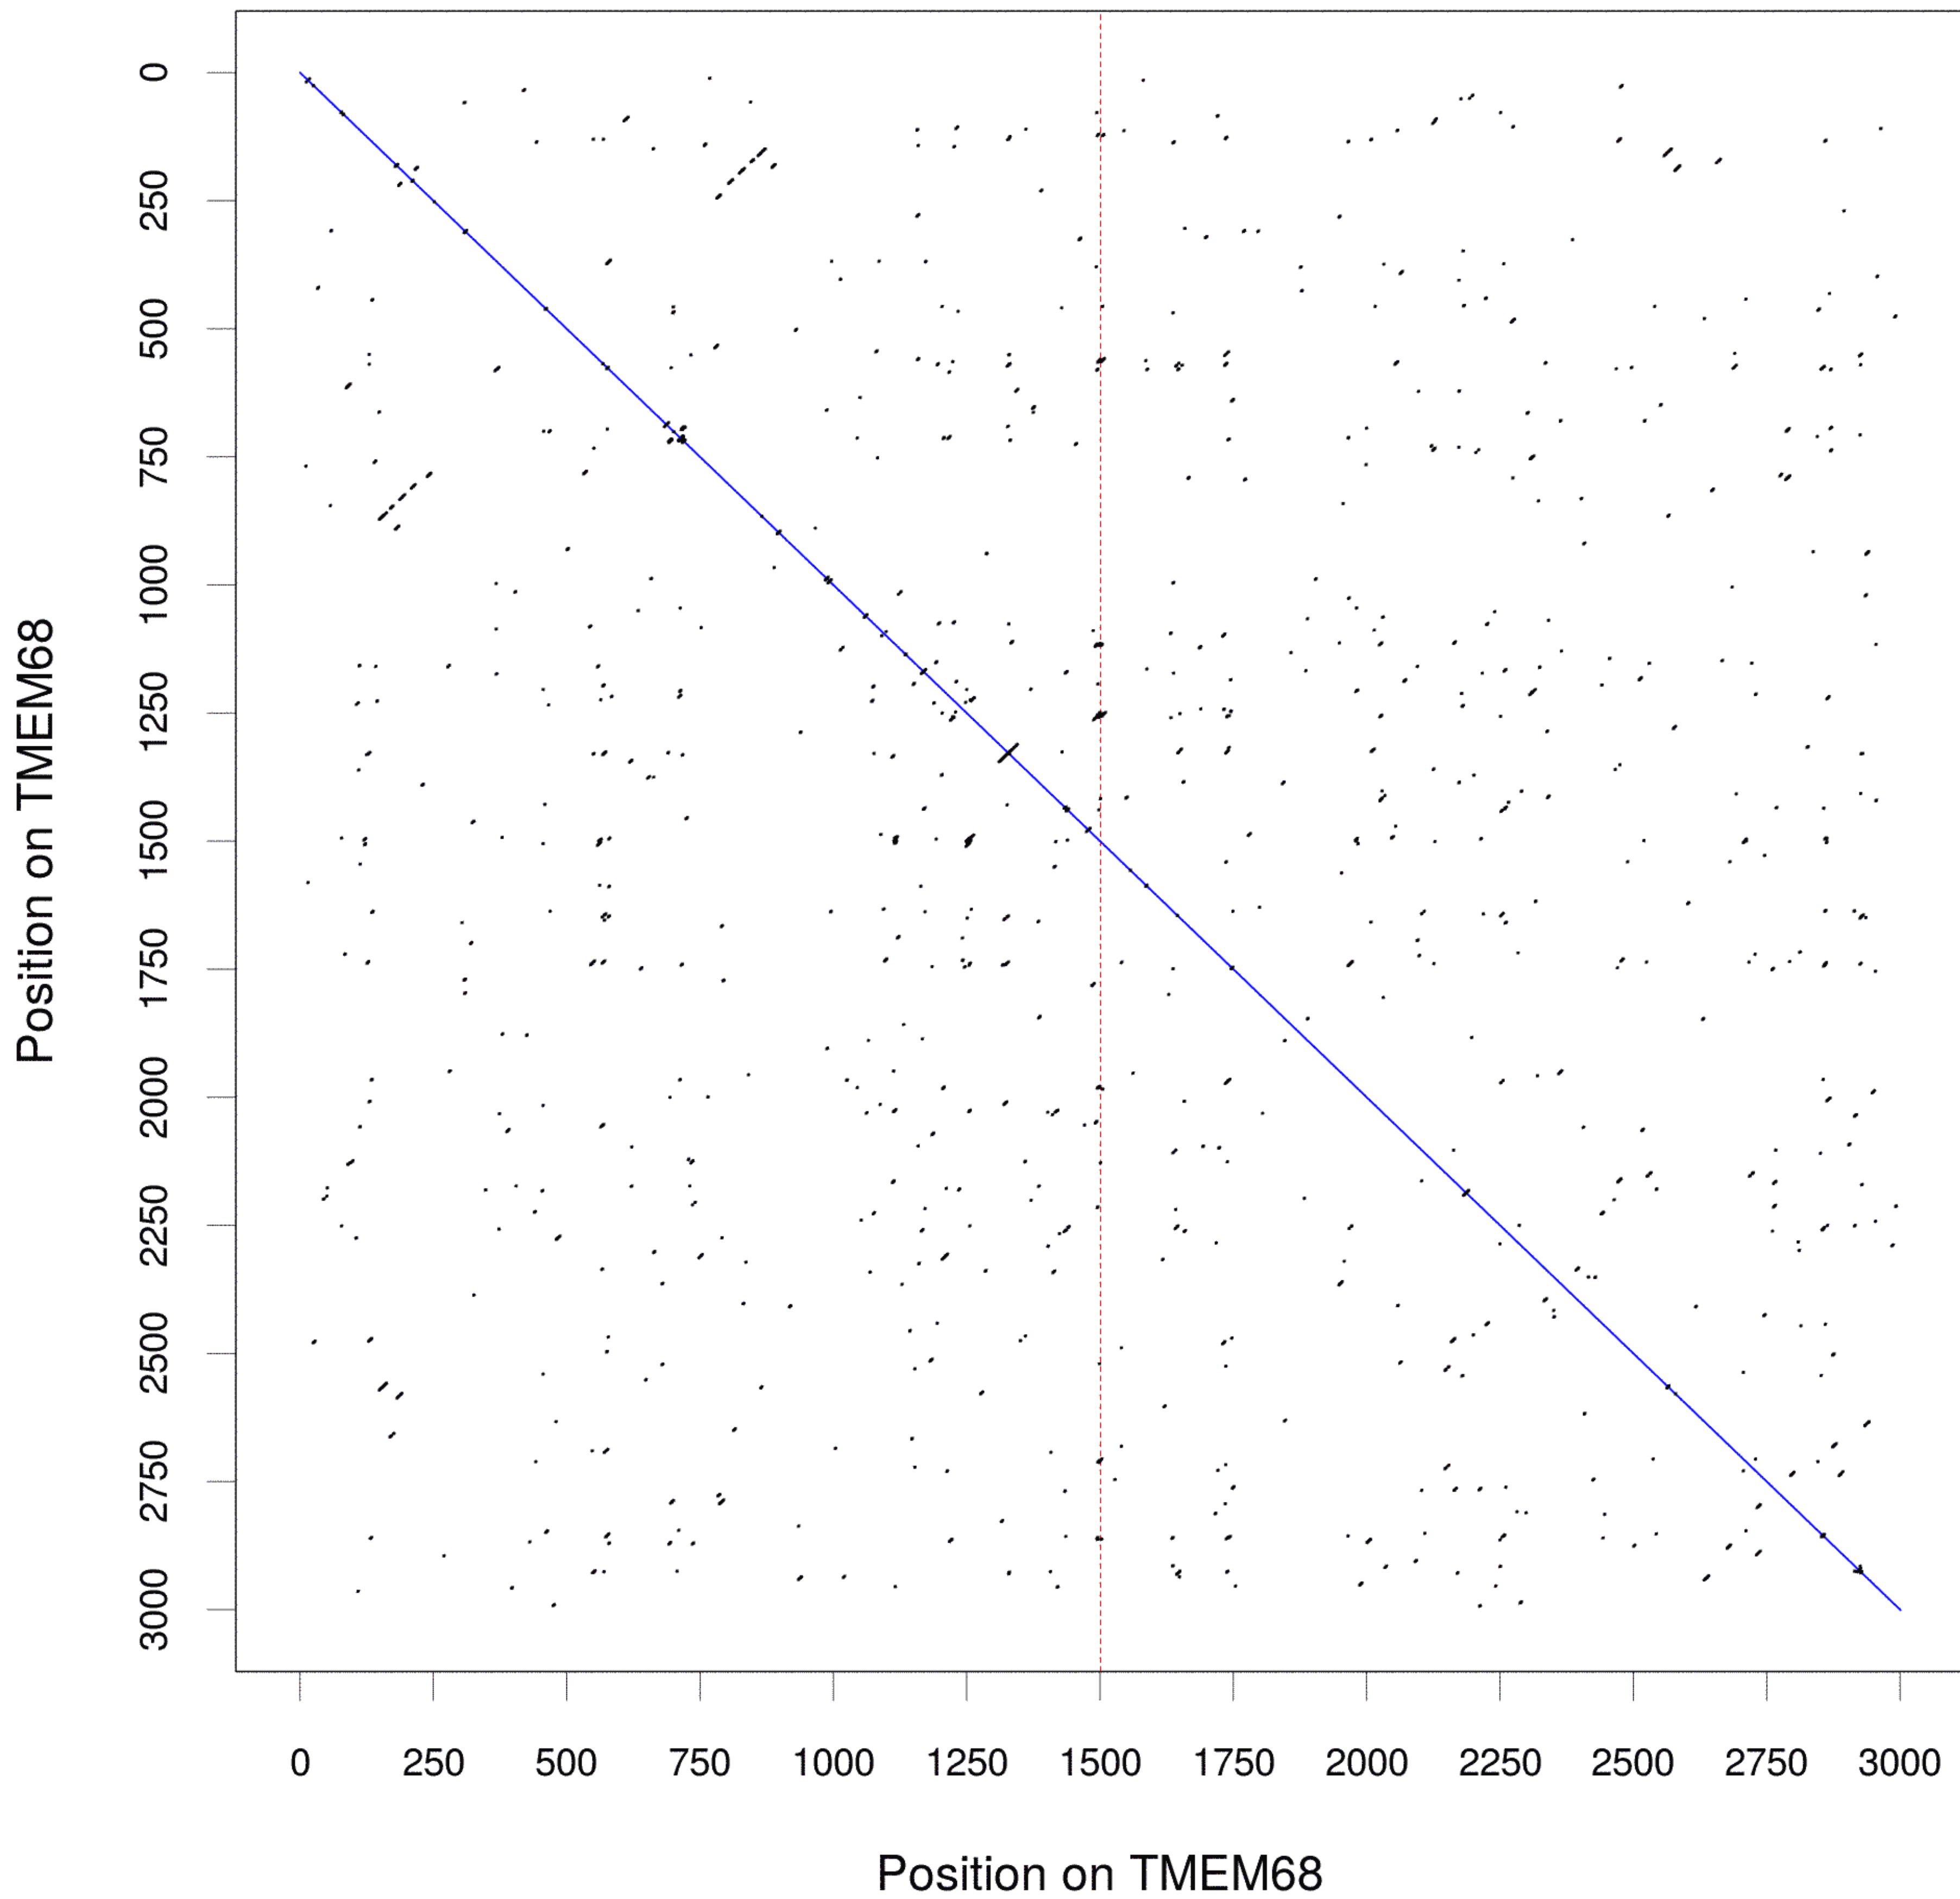

# TMEM120B

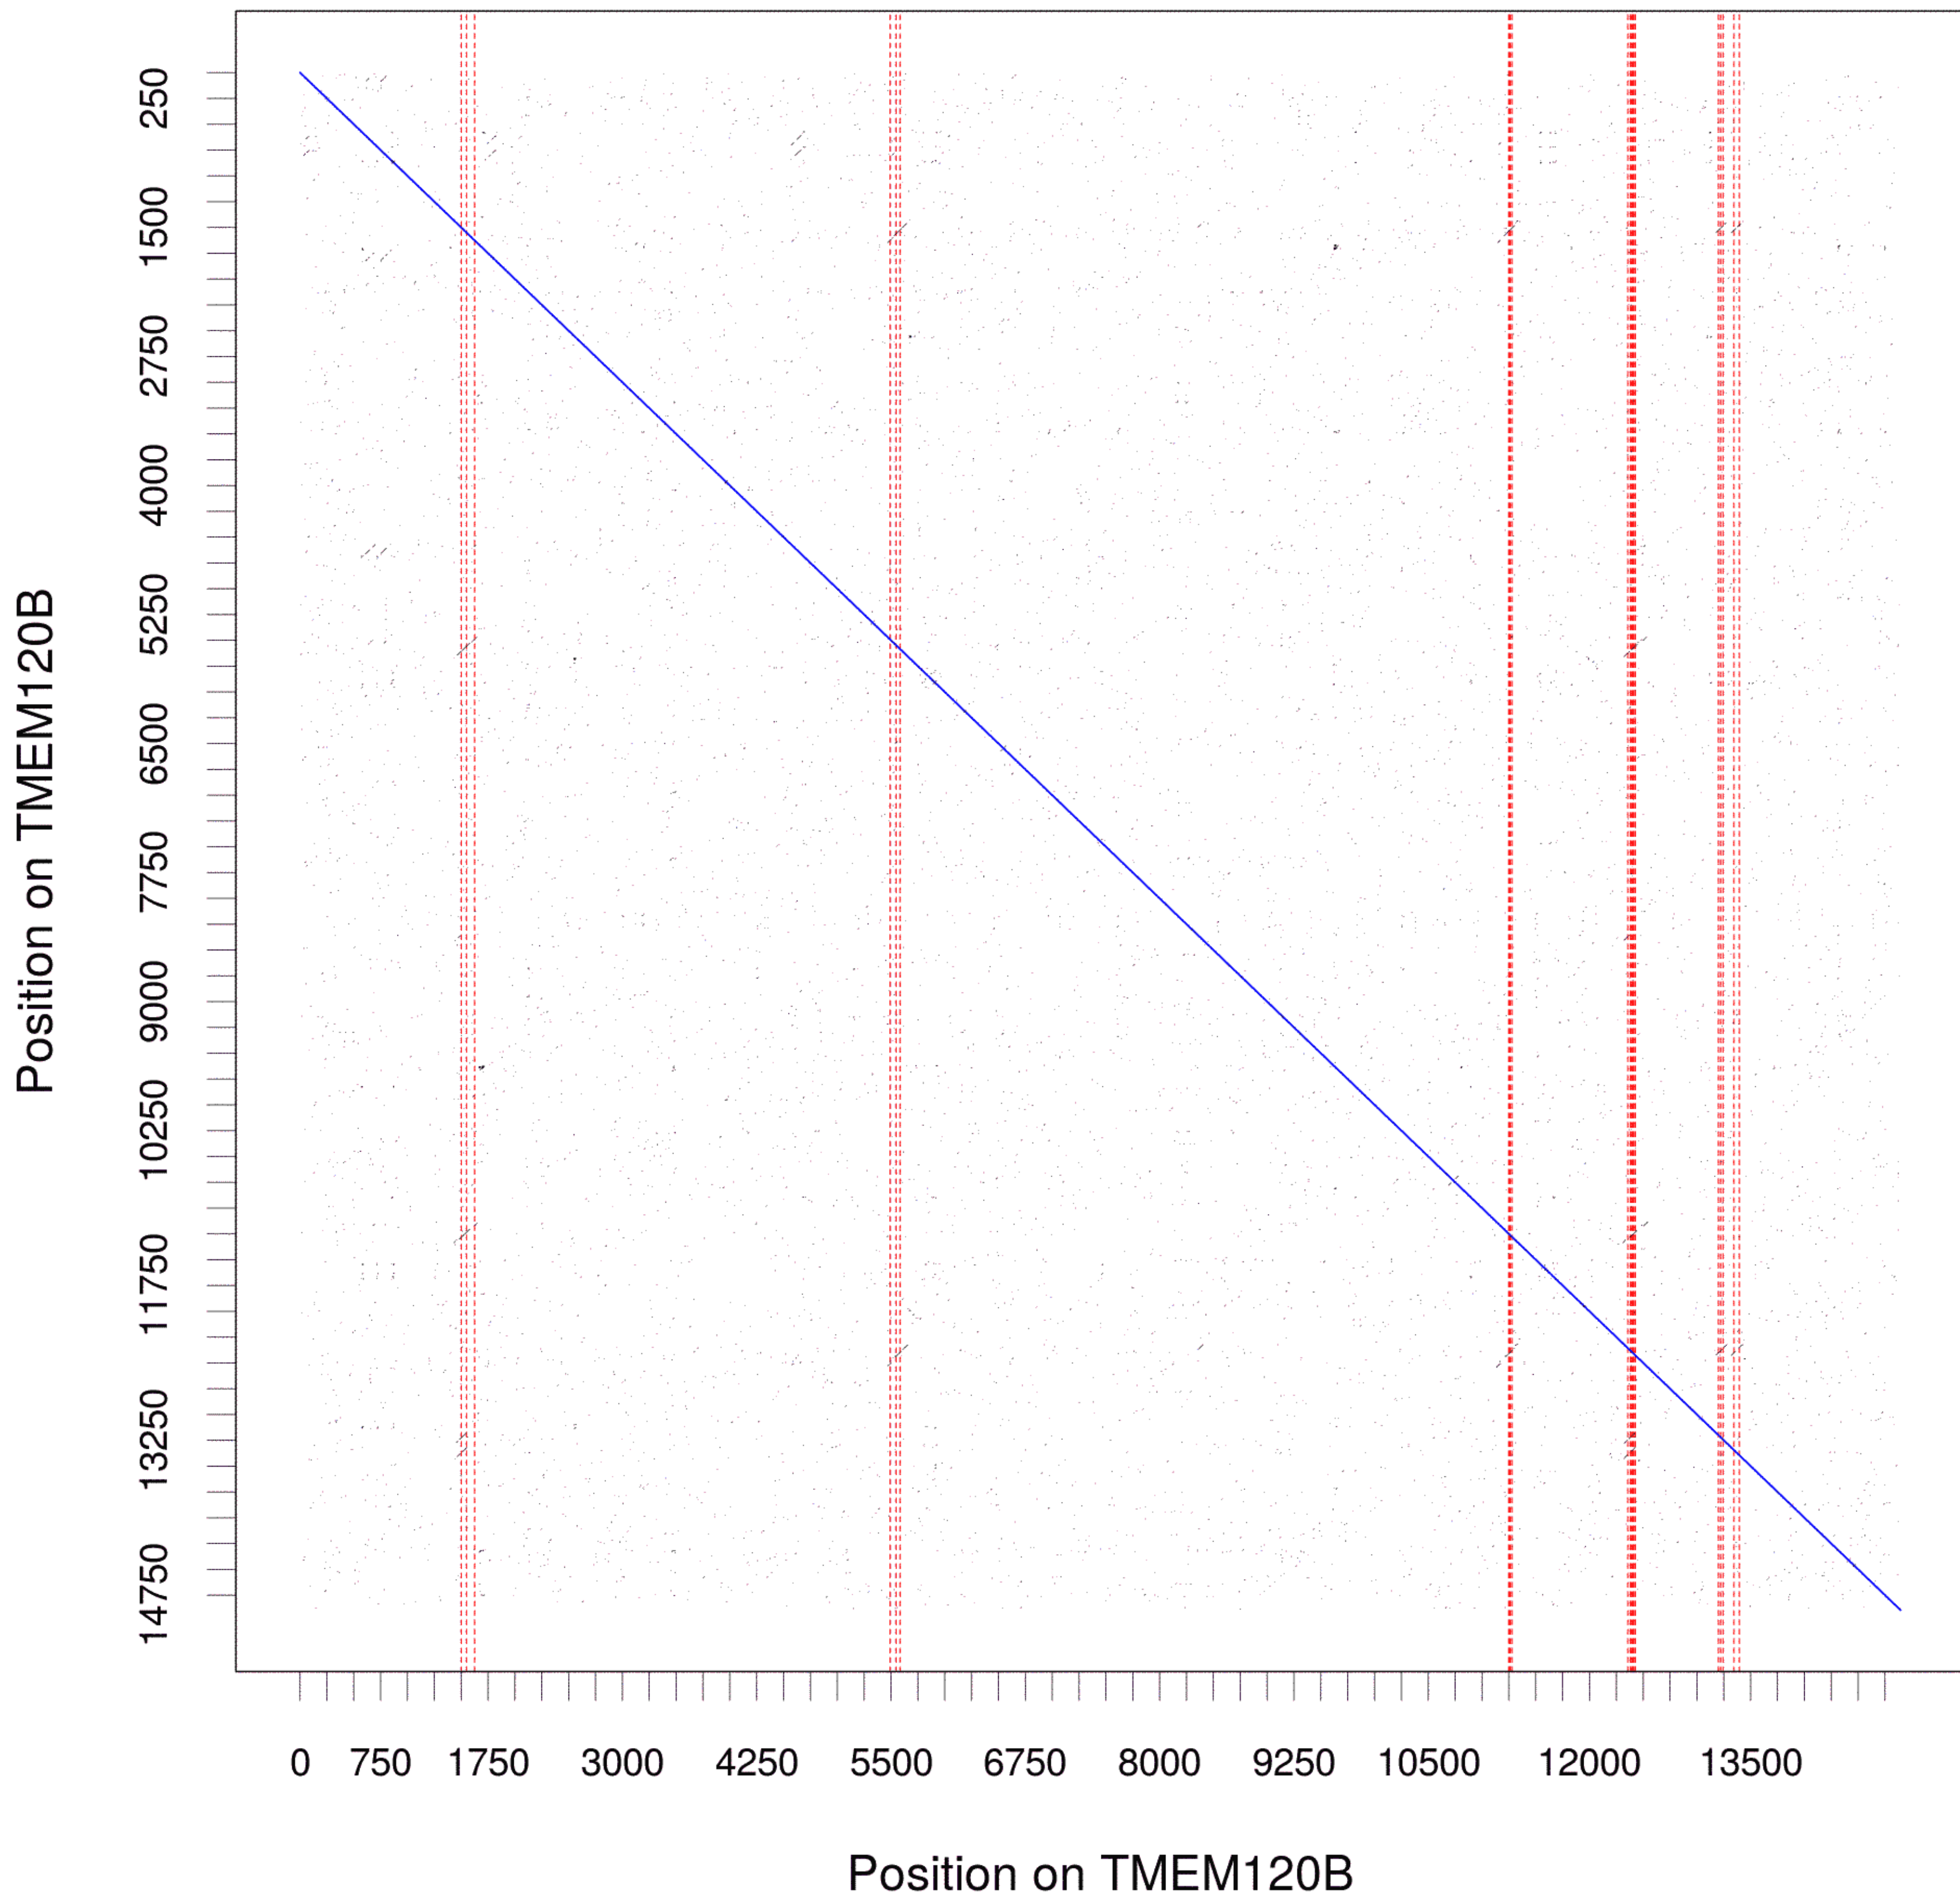

# TMEM132A

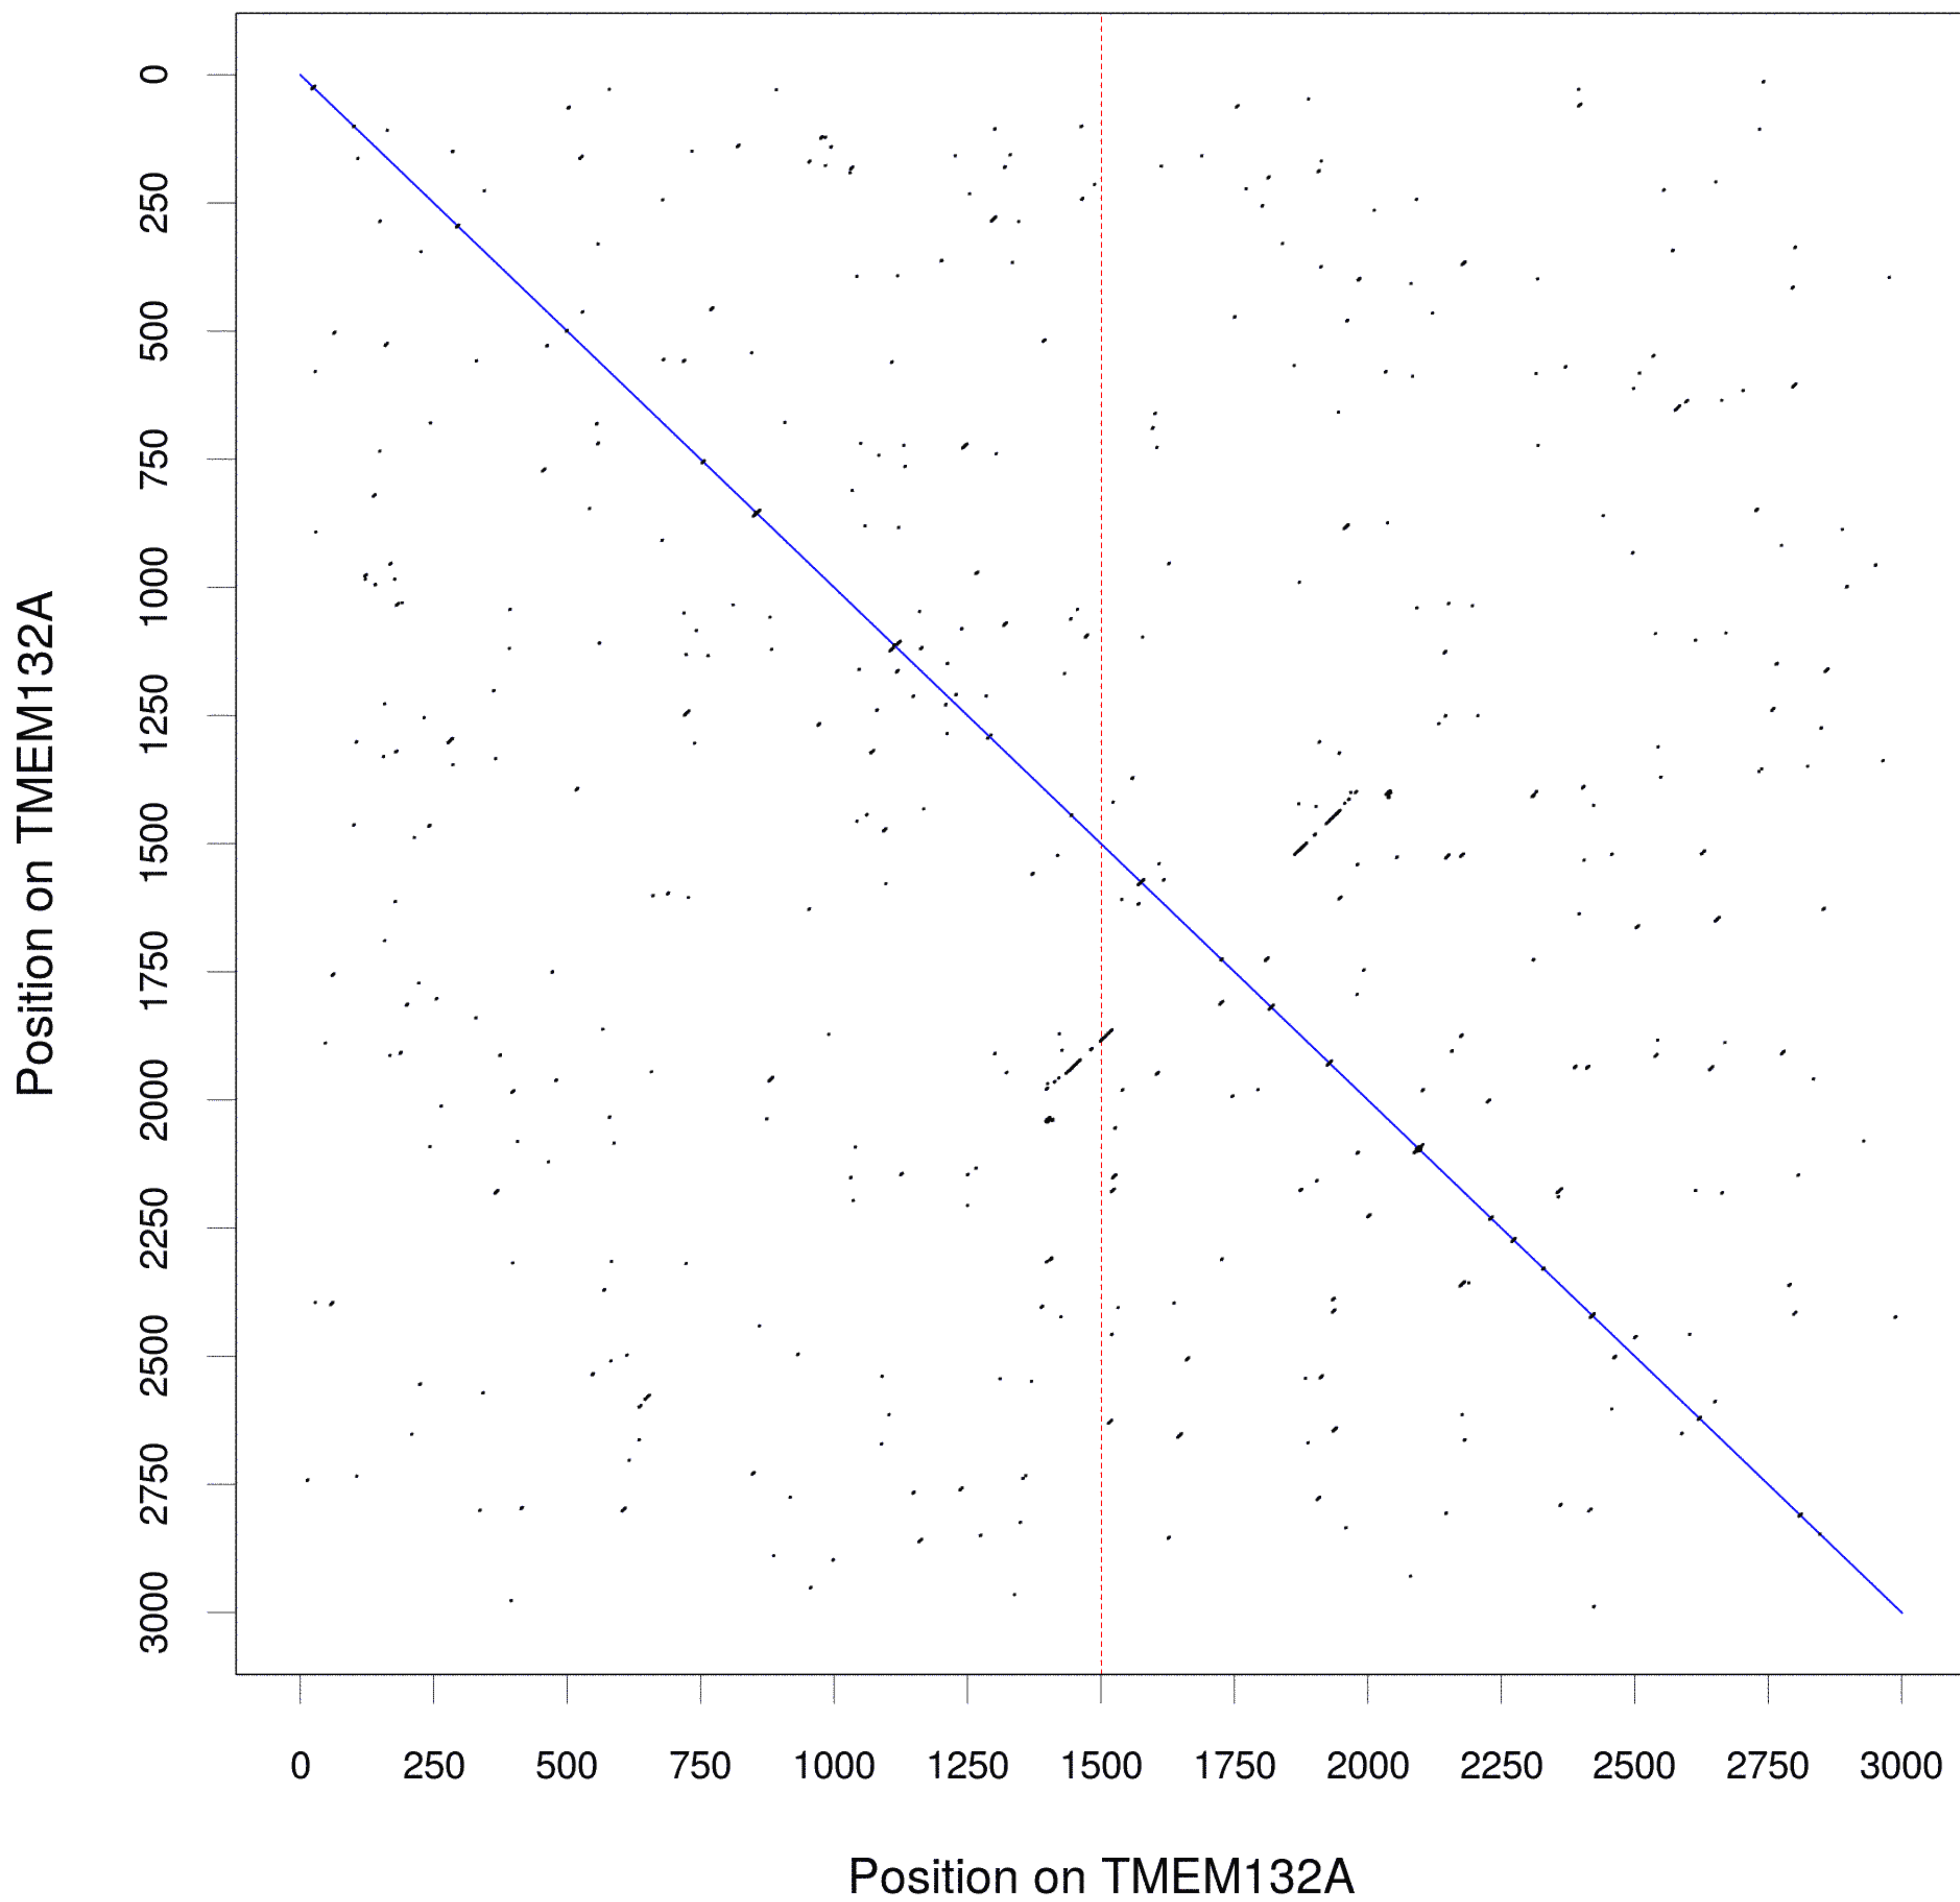

# TNFRSF10D

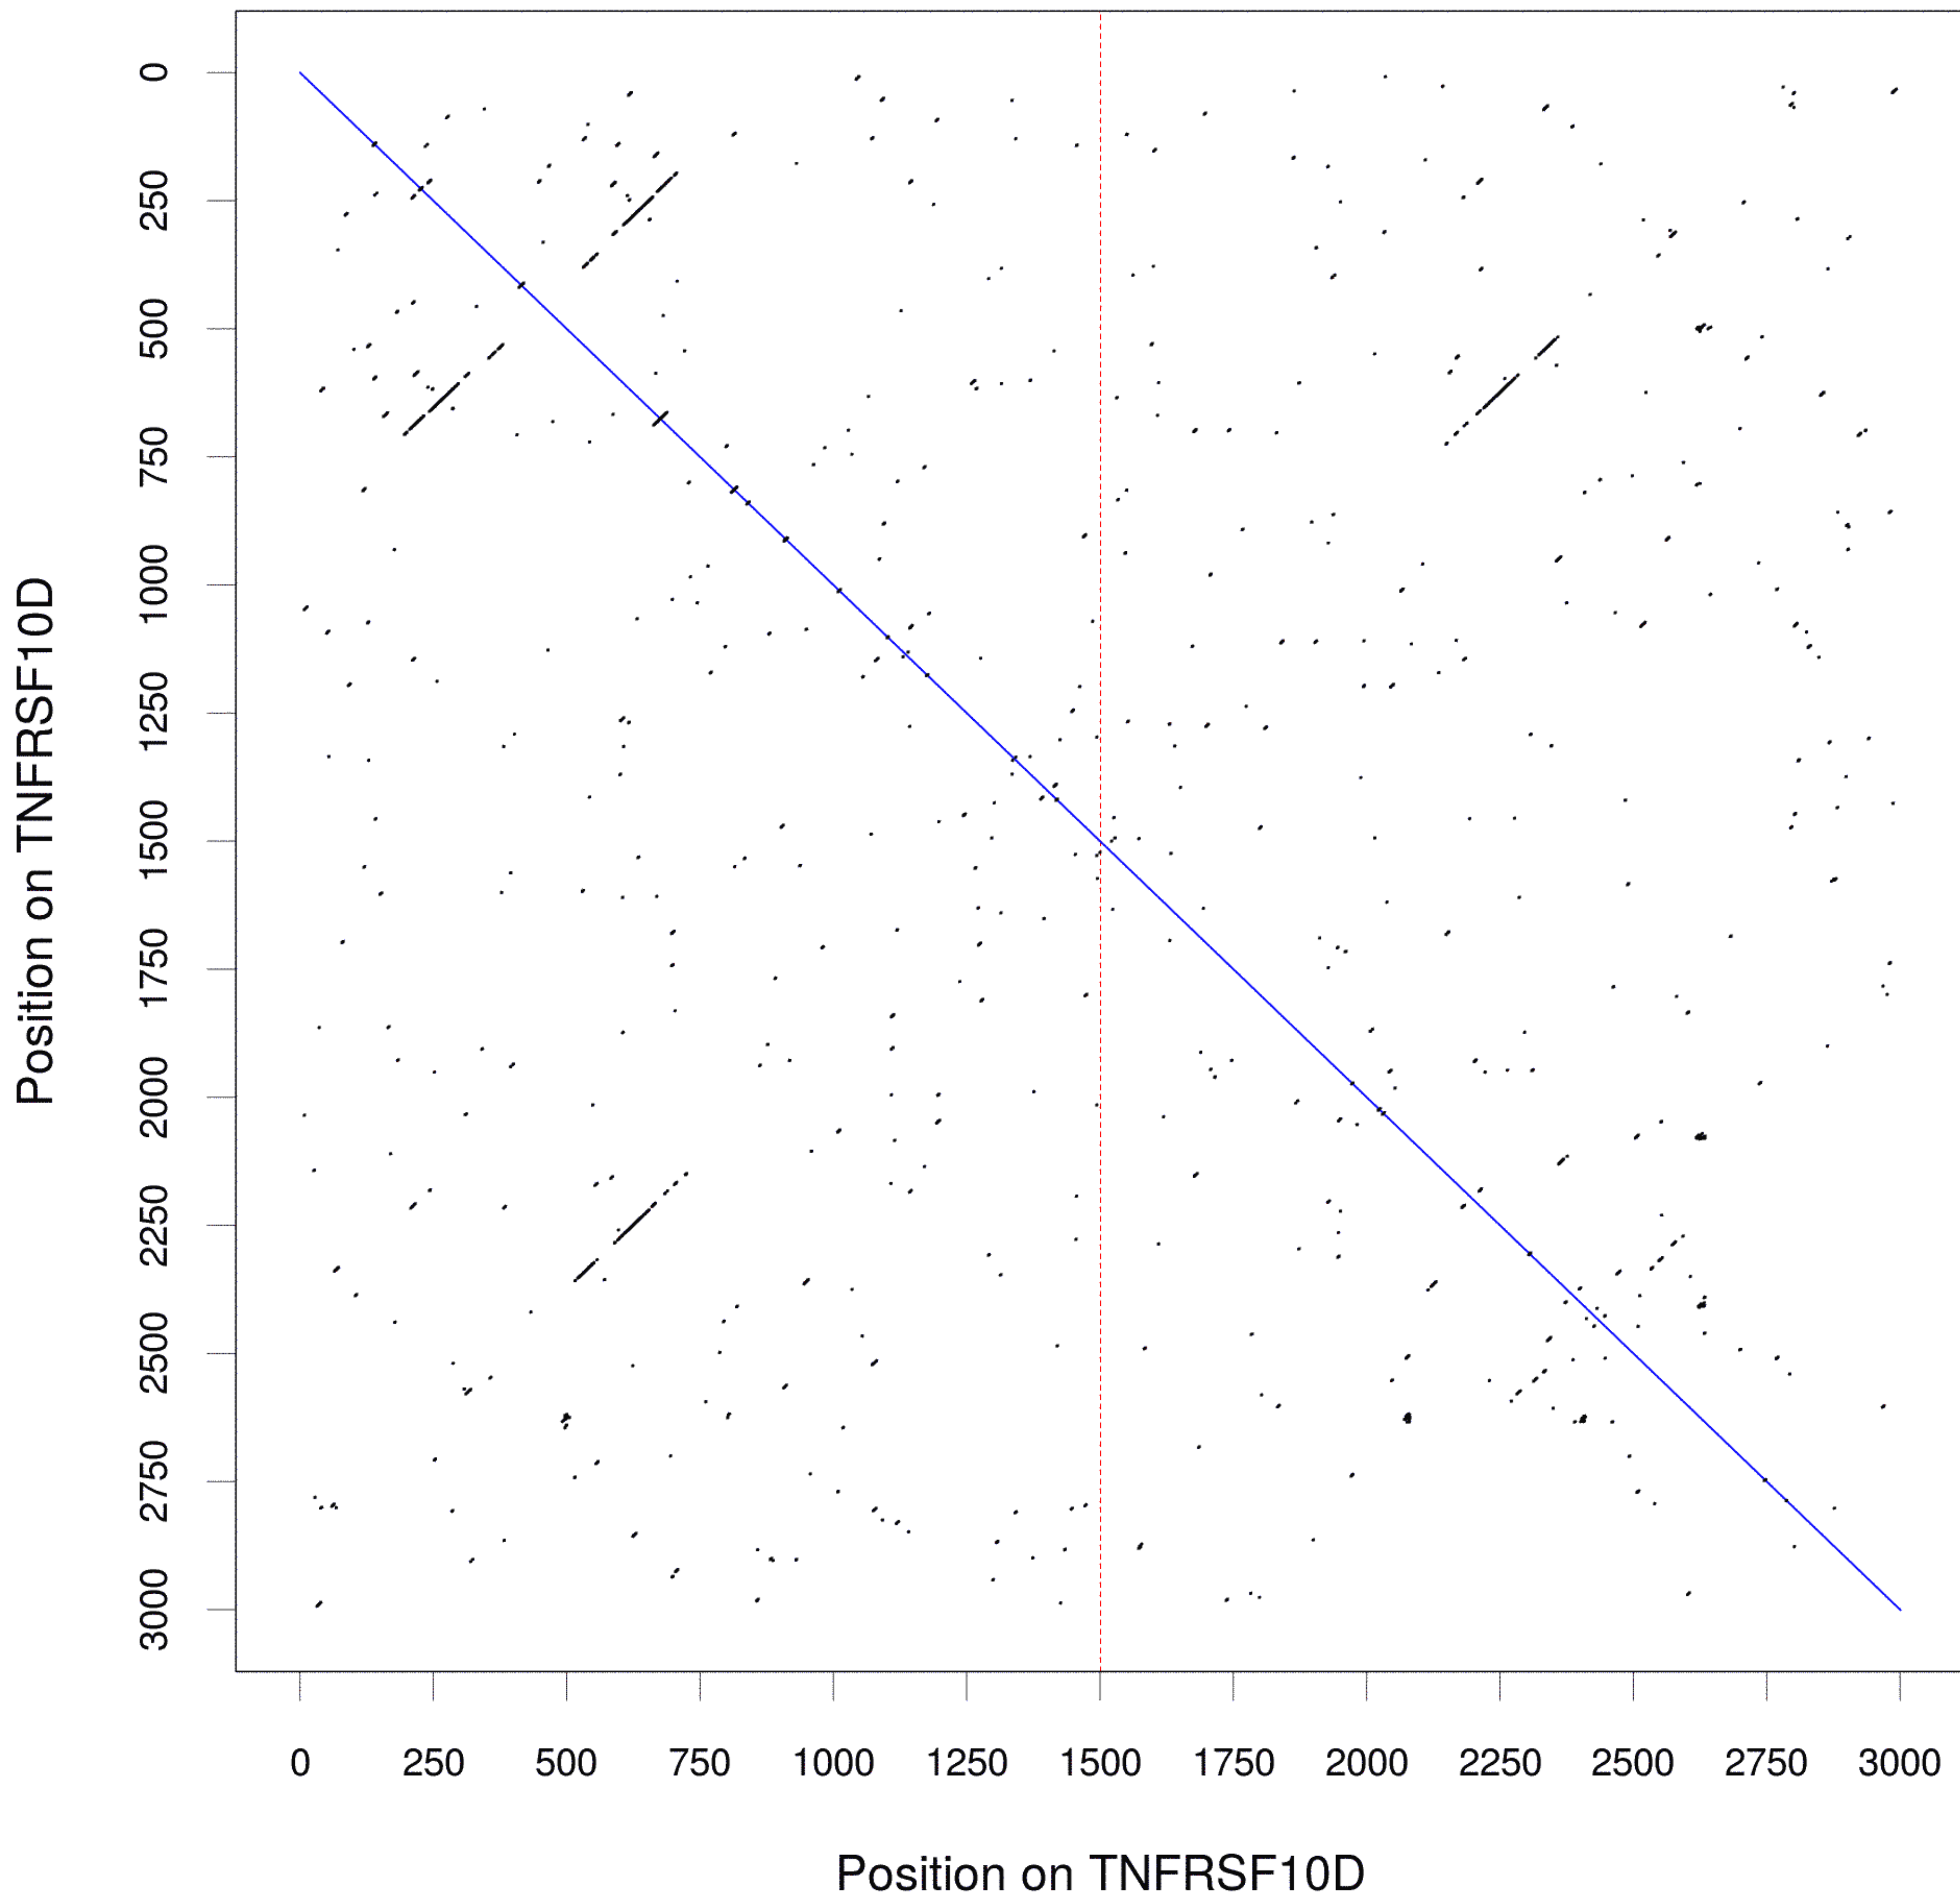

# TOM1L1

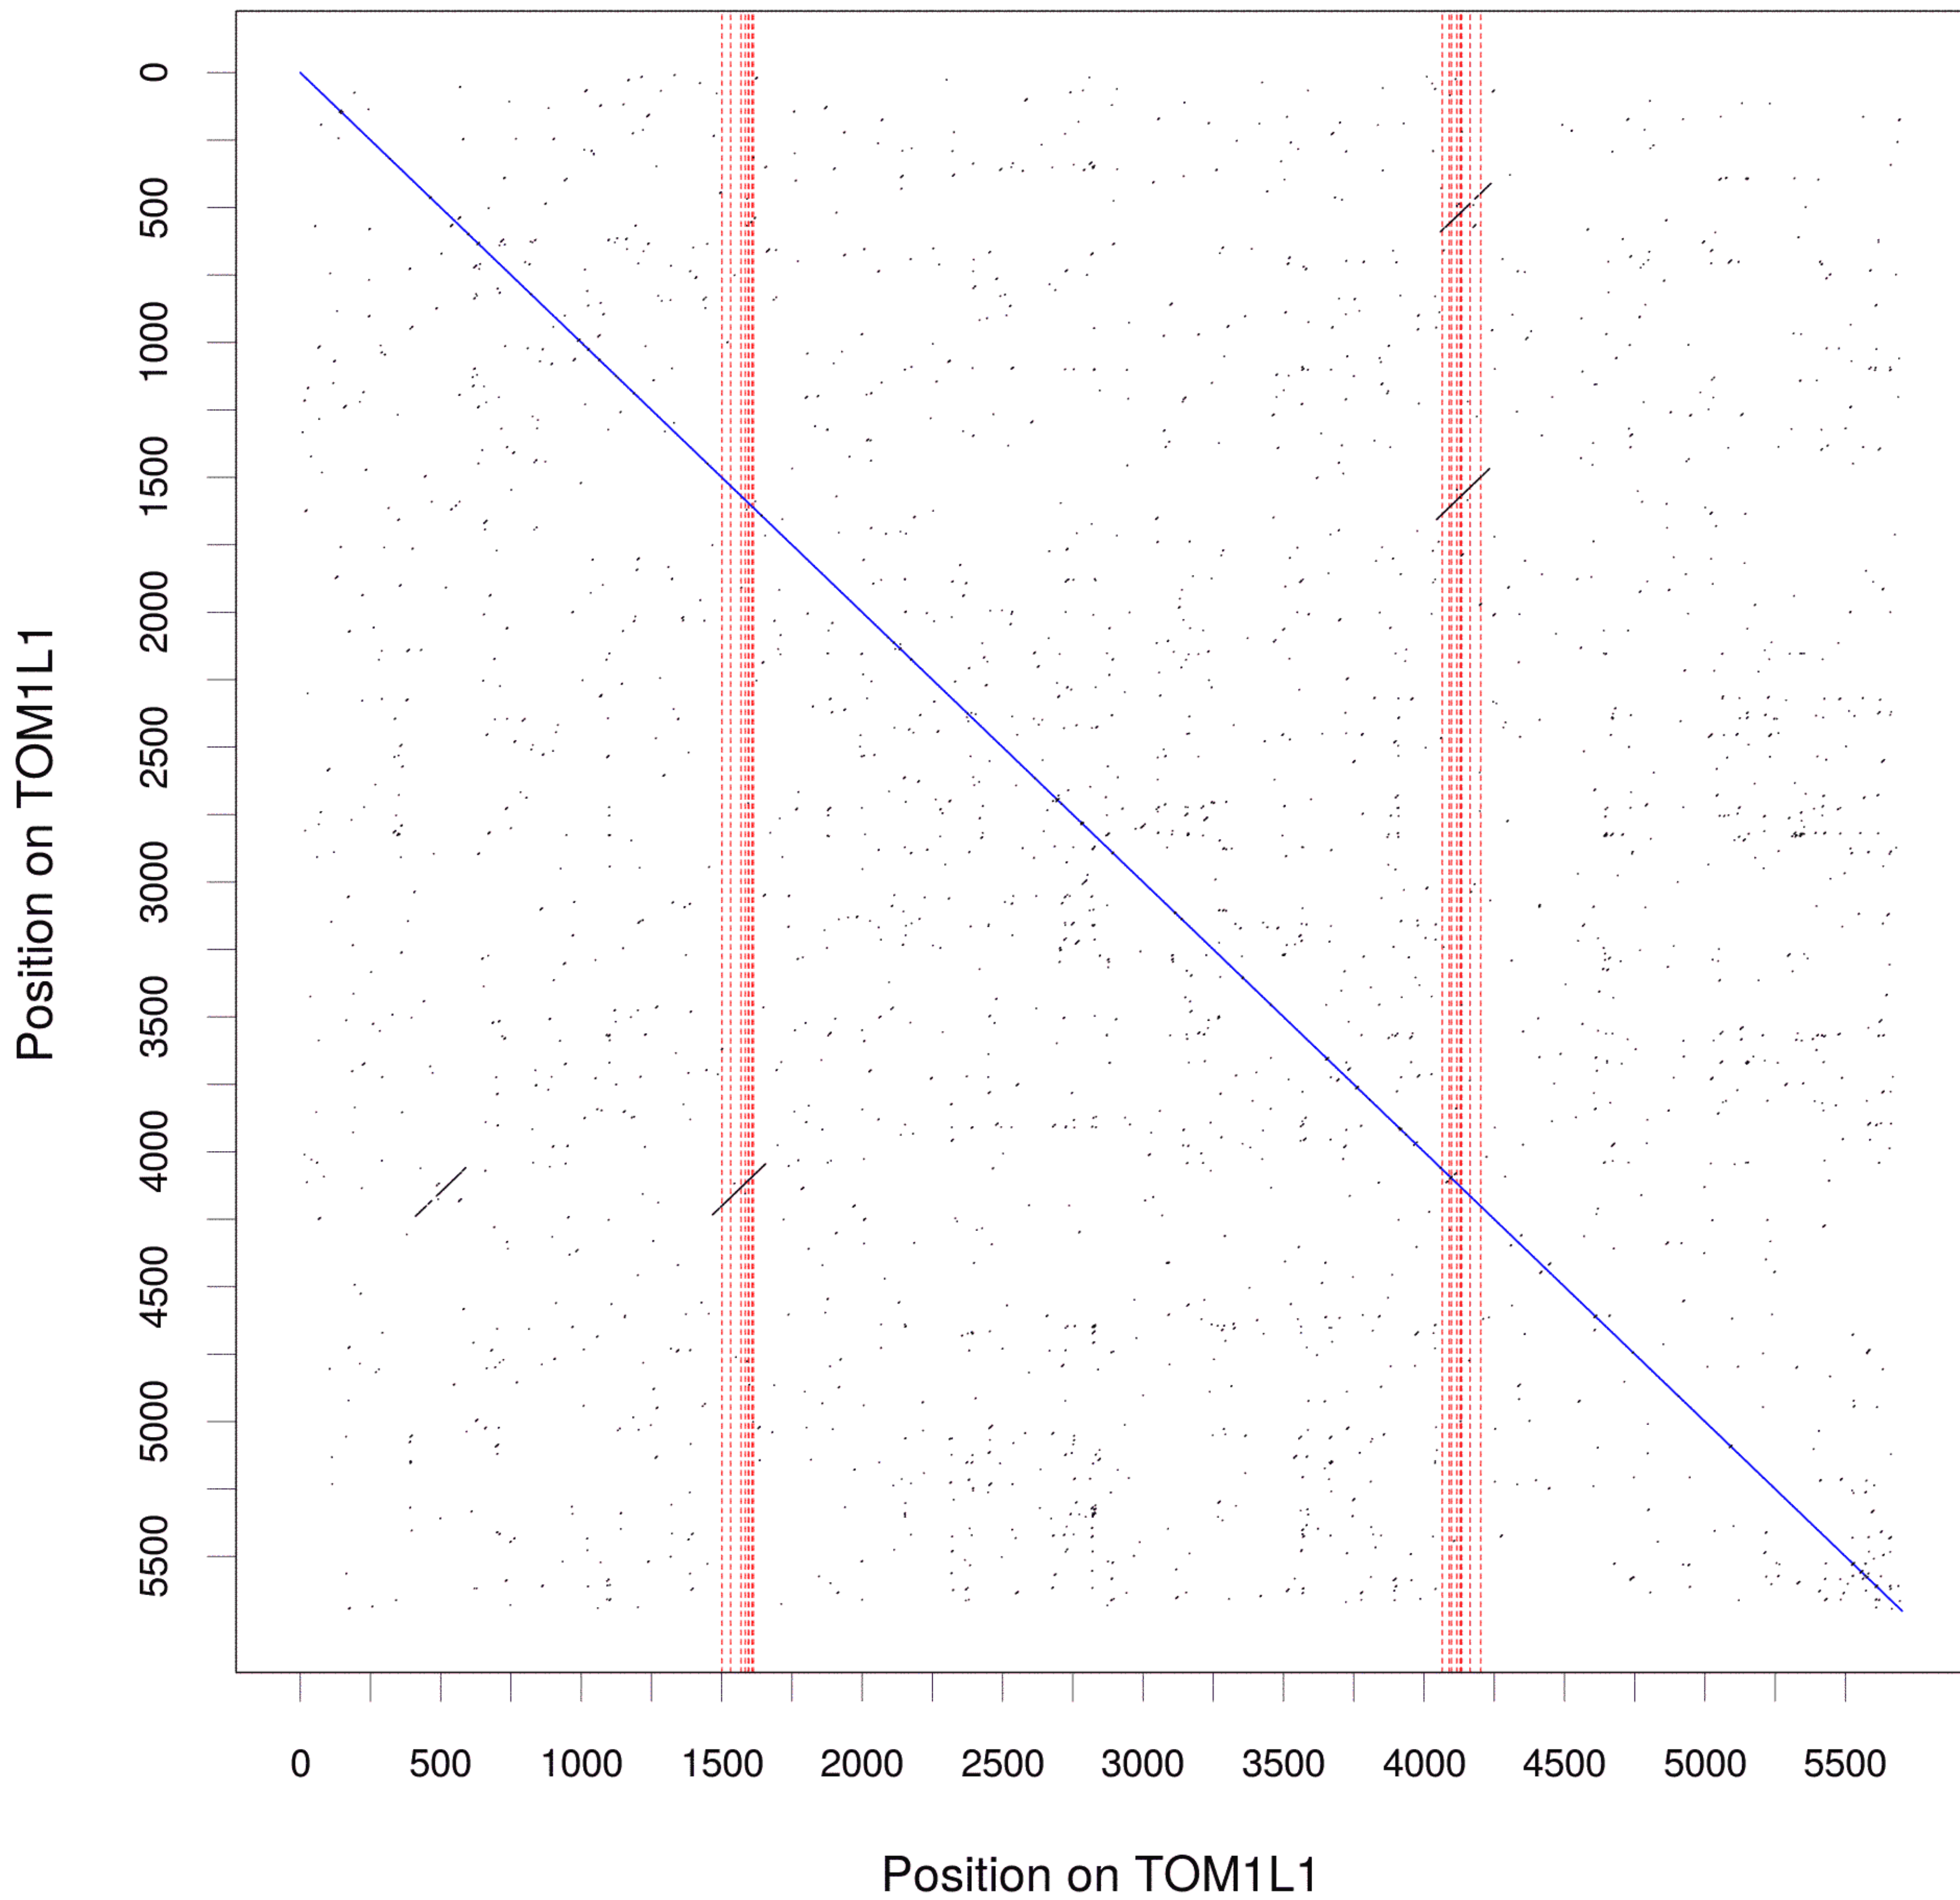

# TRMT5

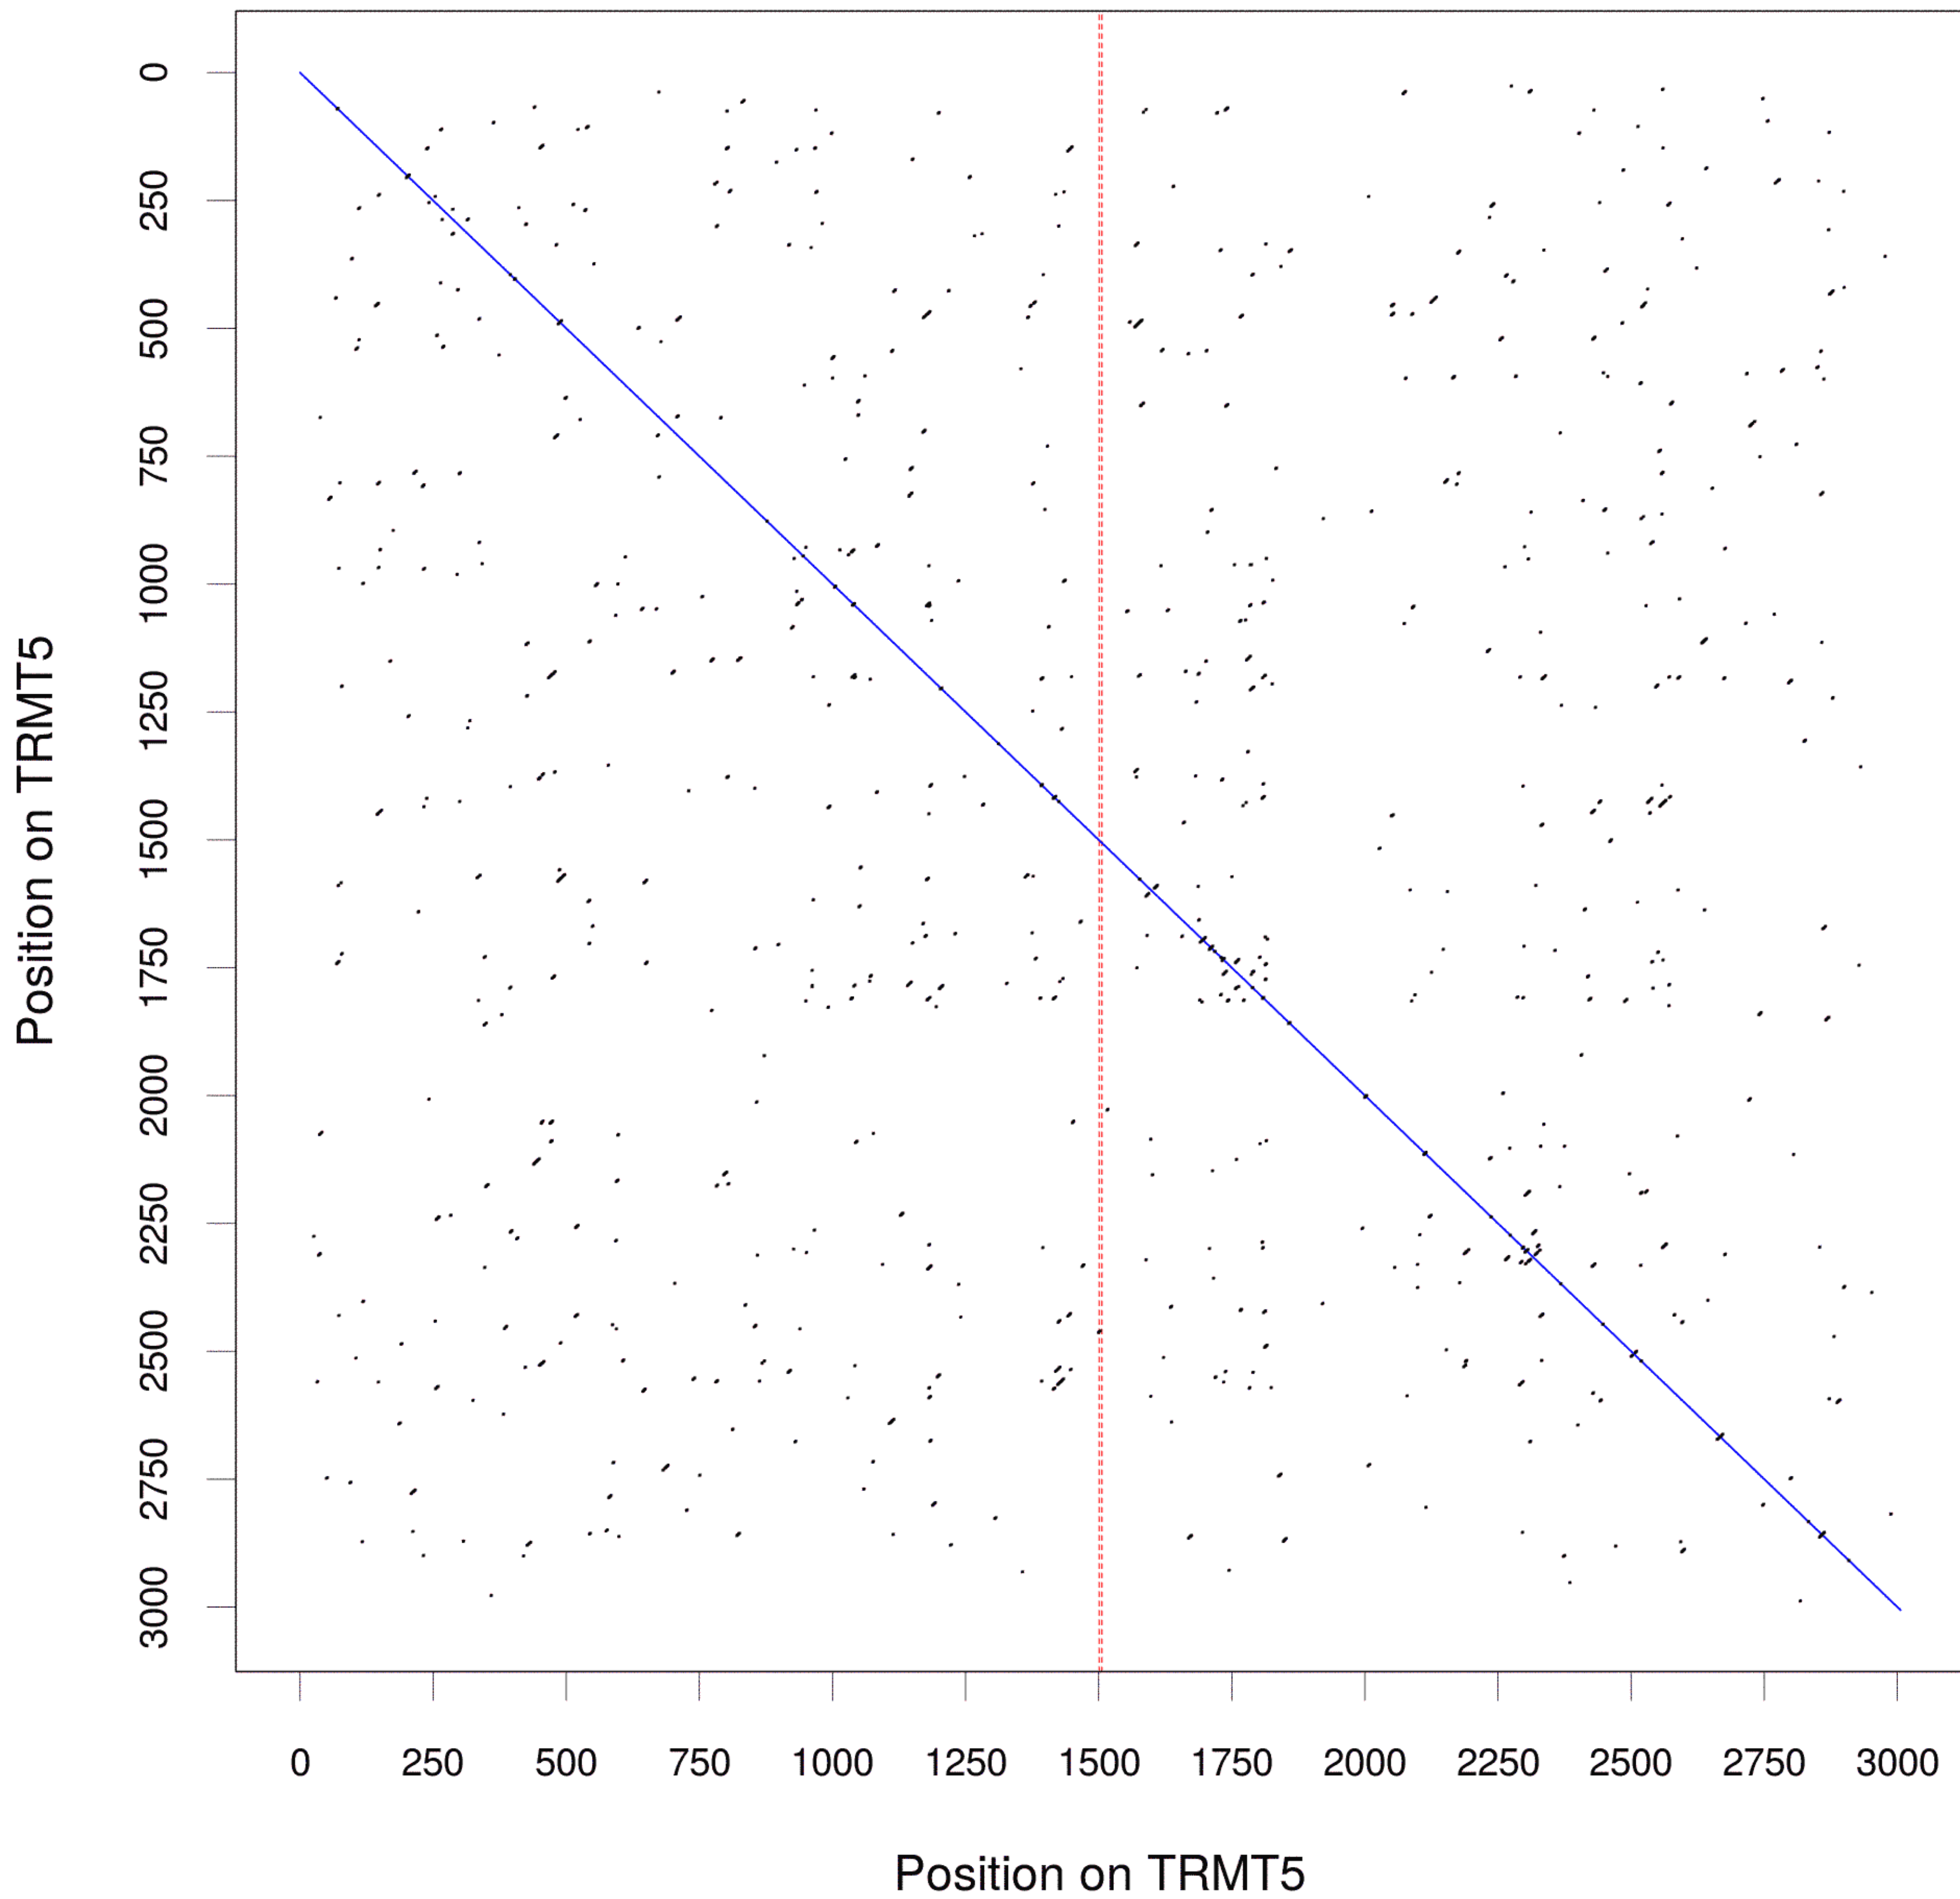

# TRMT13

Position on TRMT13

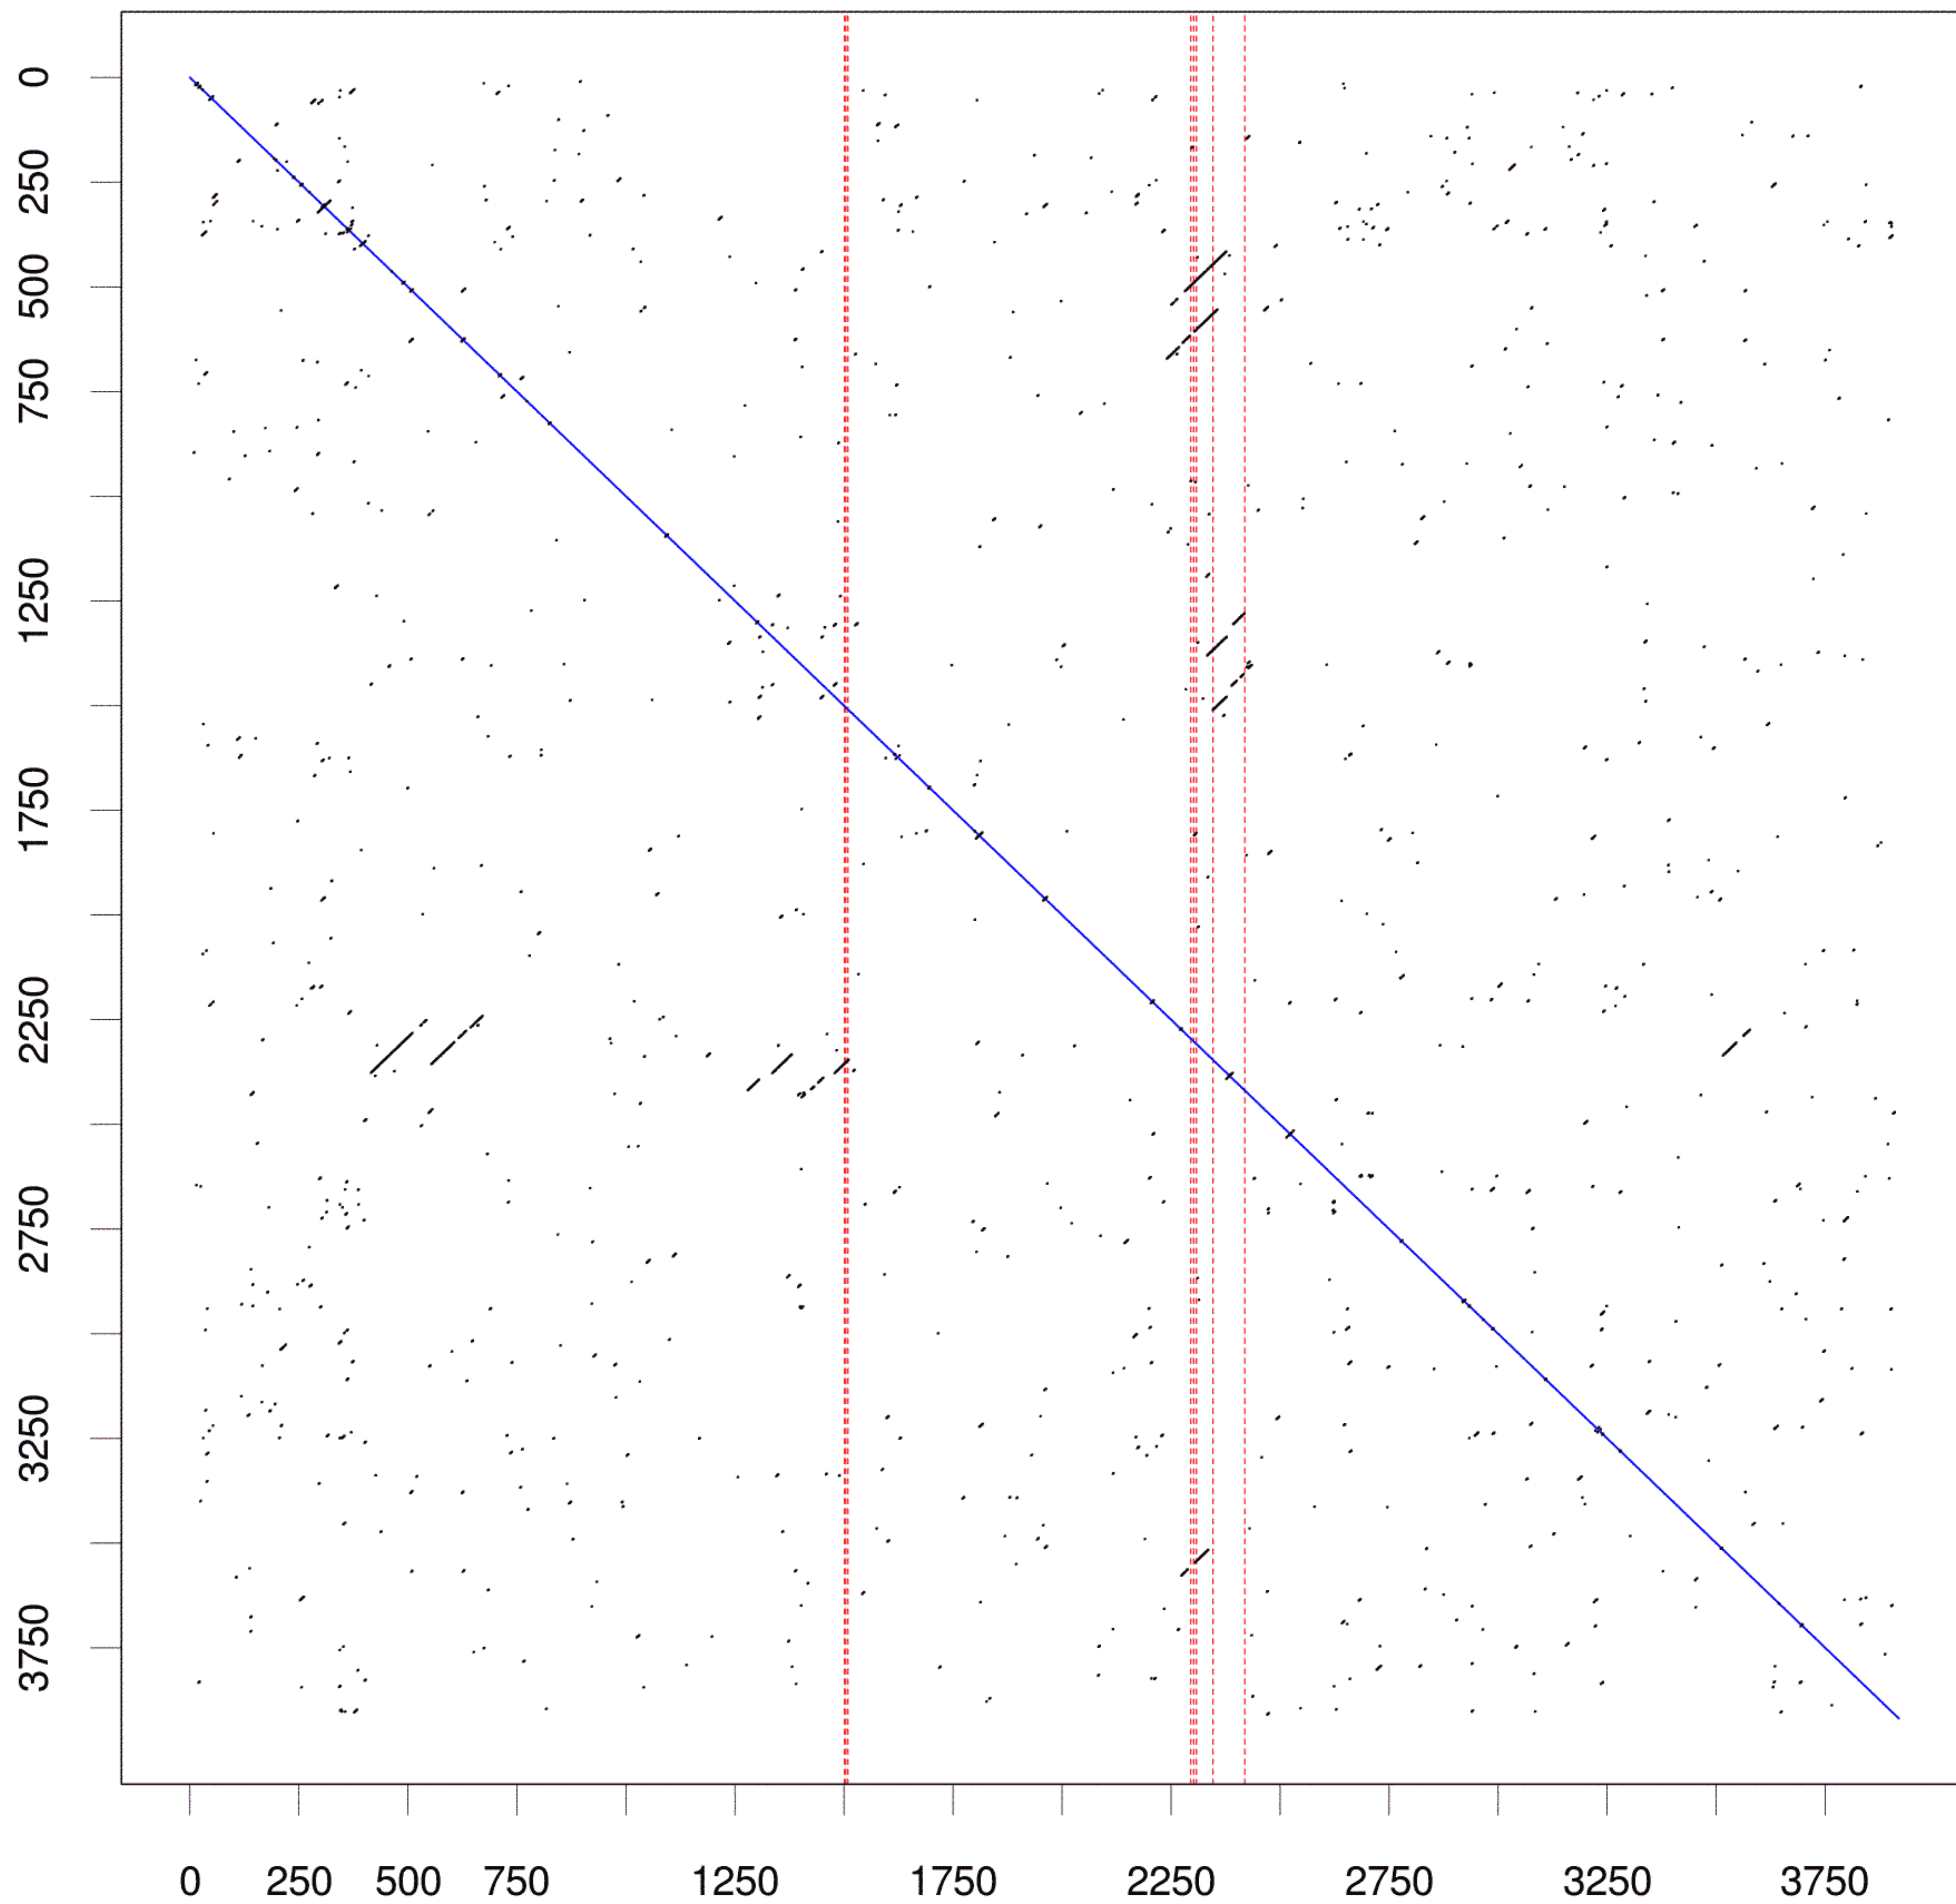

Position on TRMT13

# TUBG2

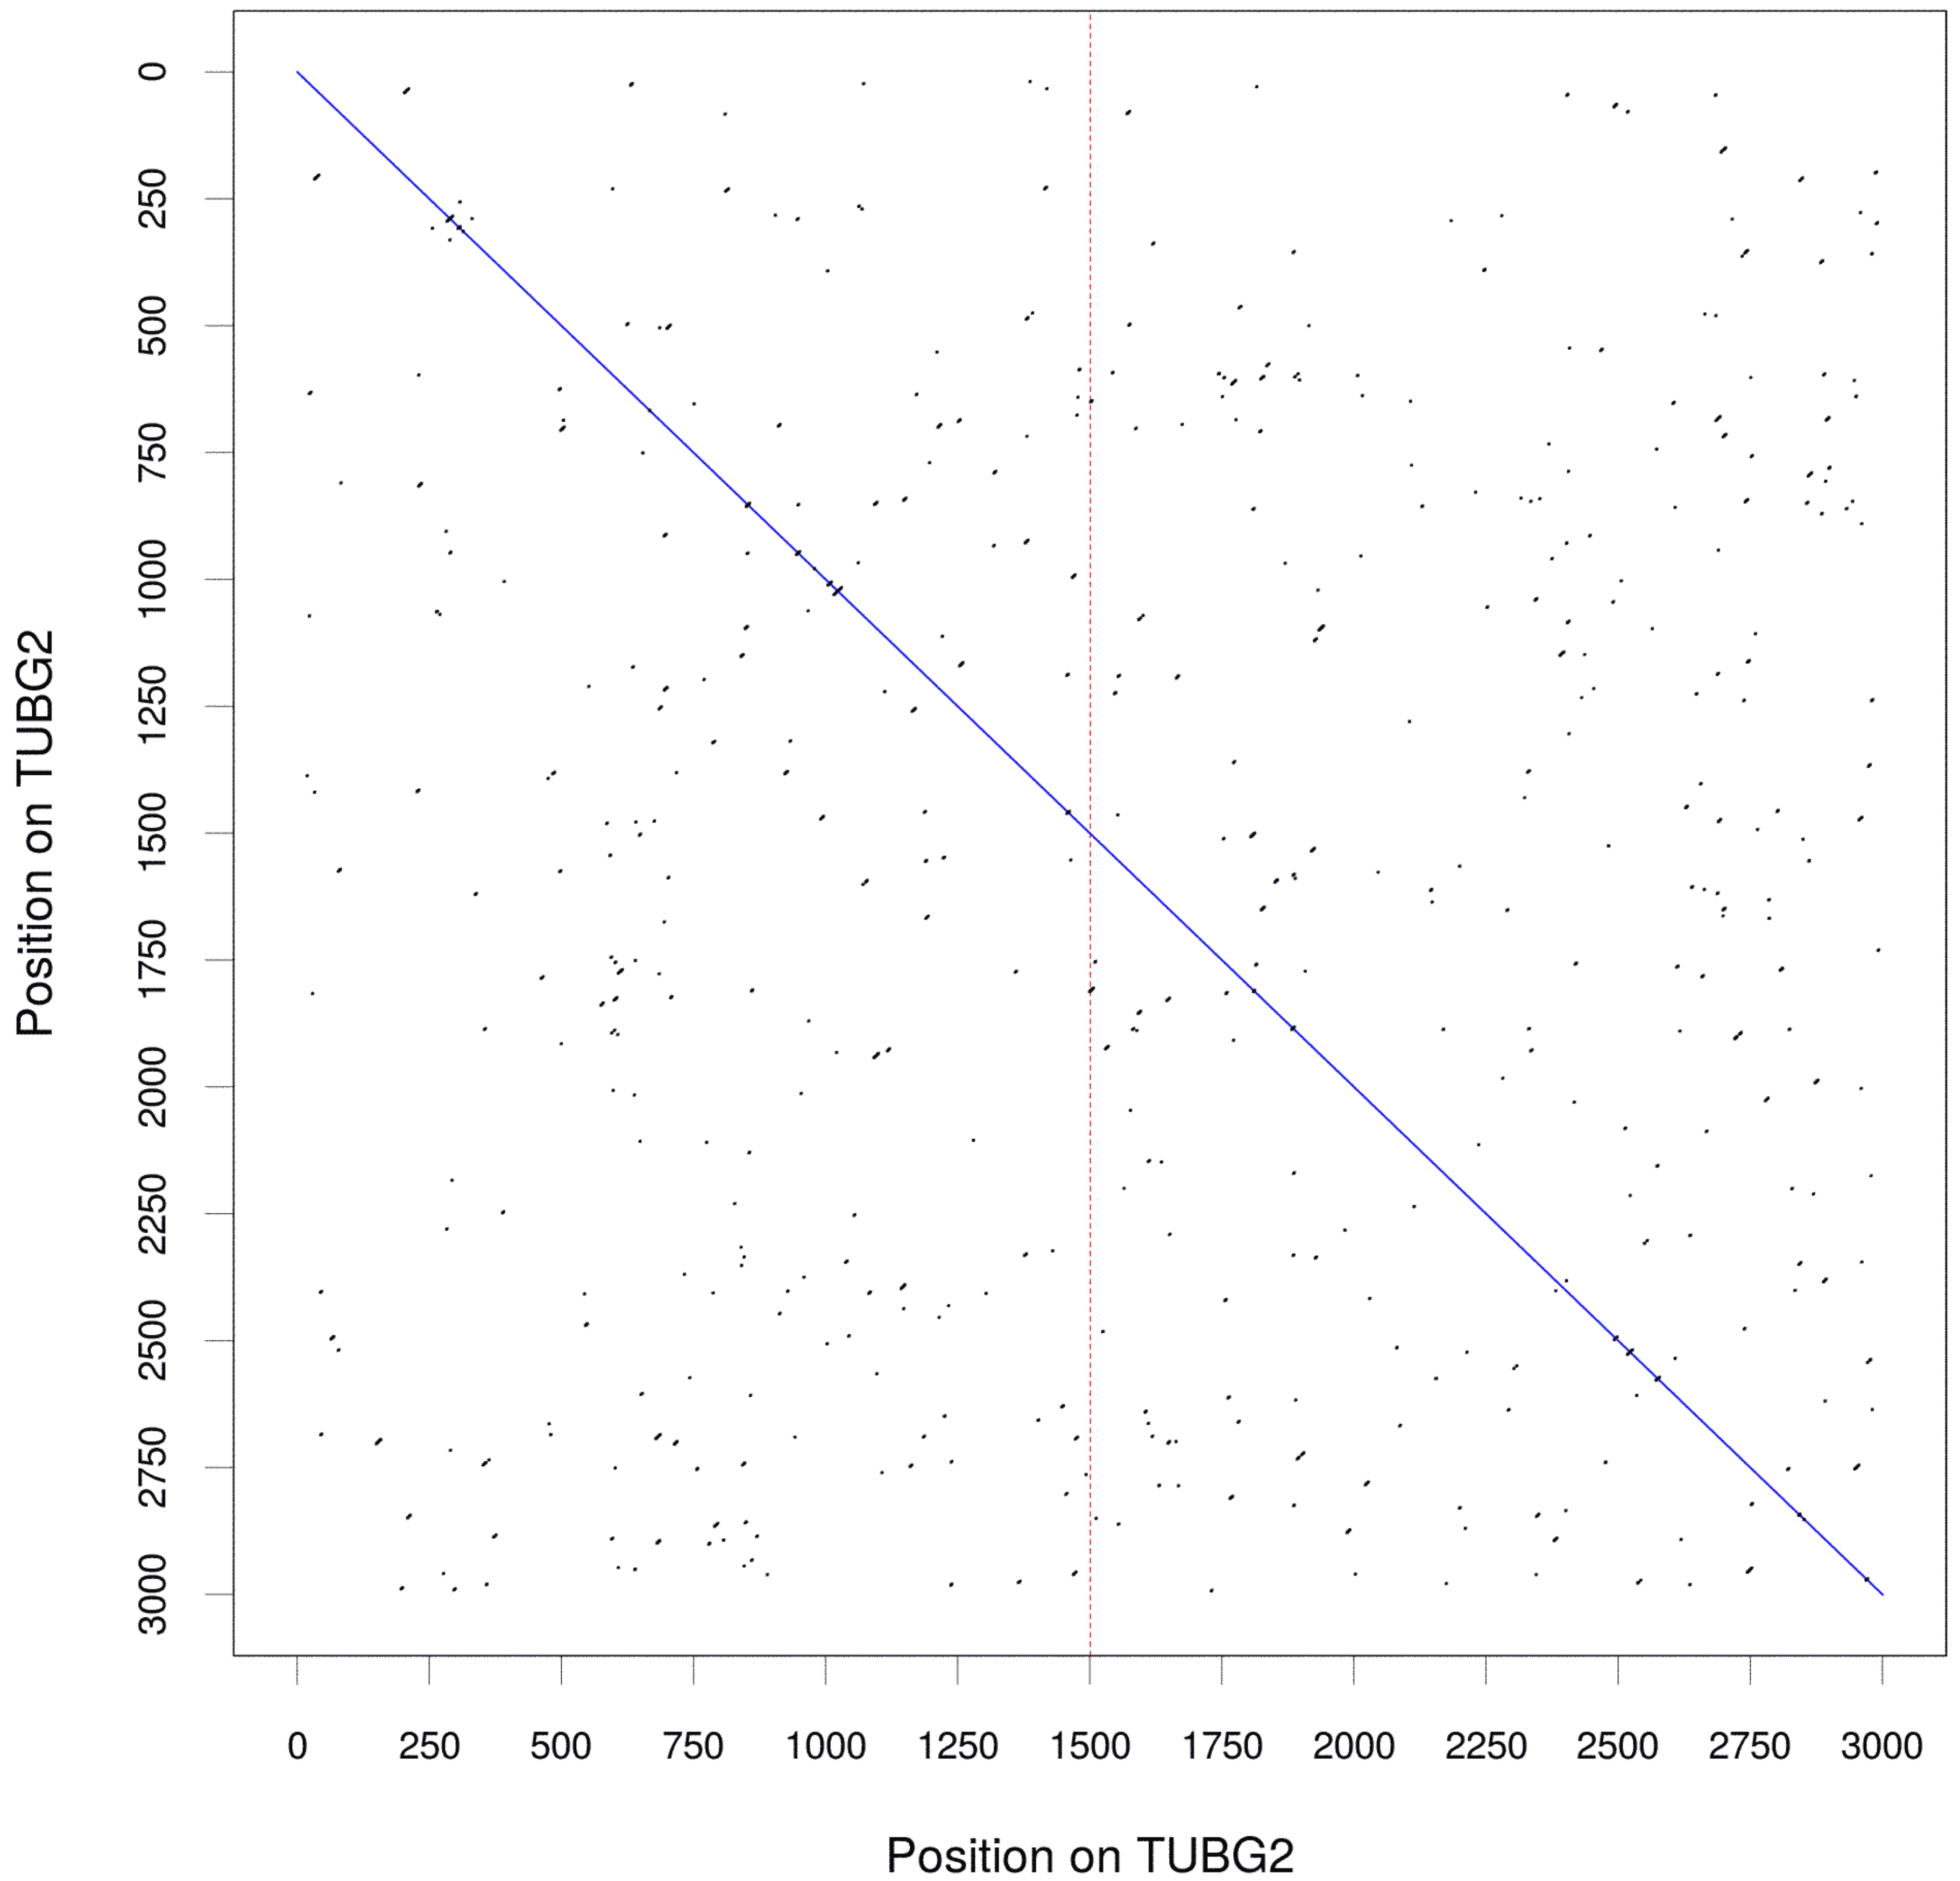



# TULP2

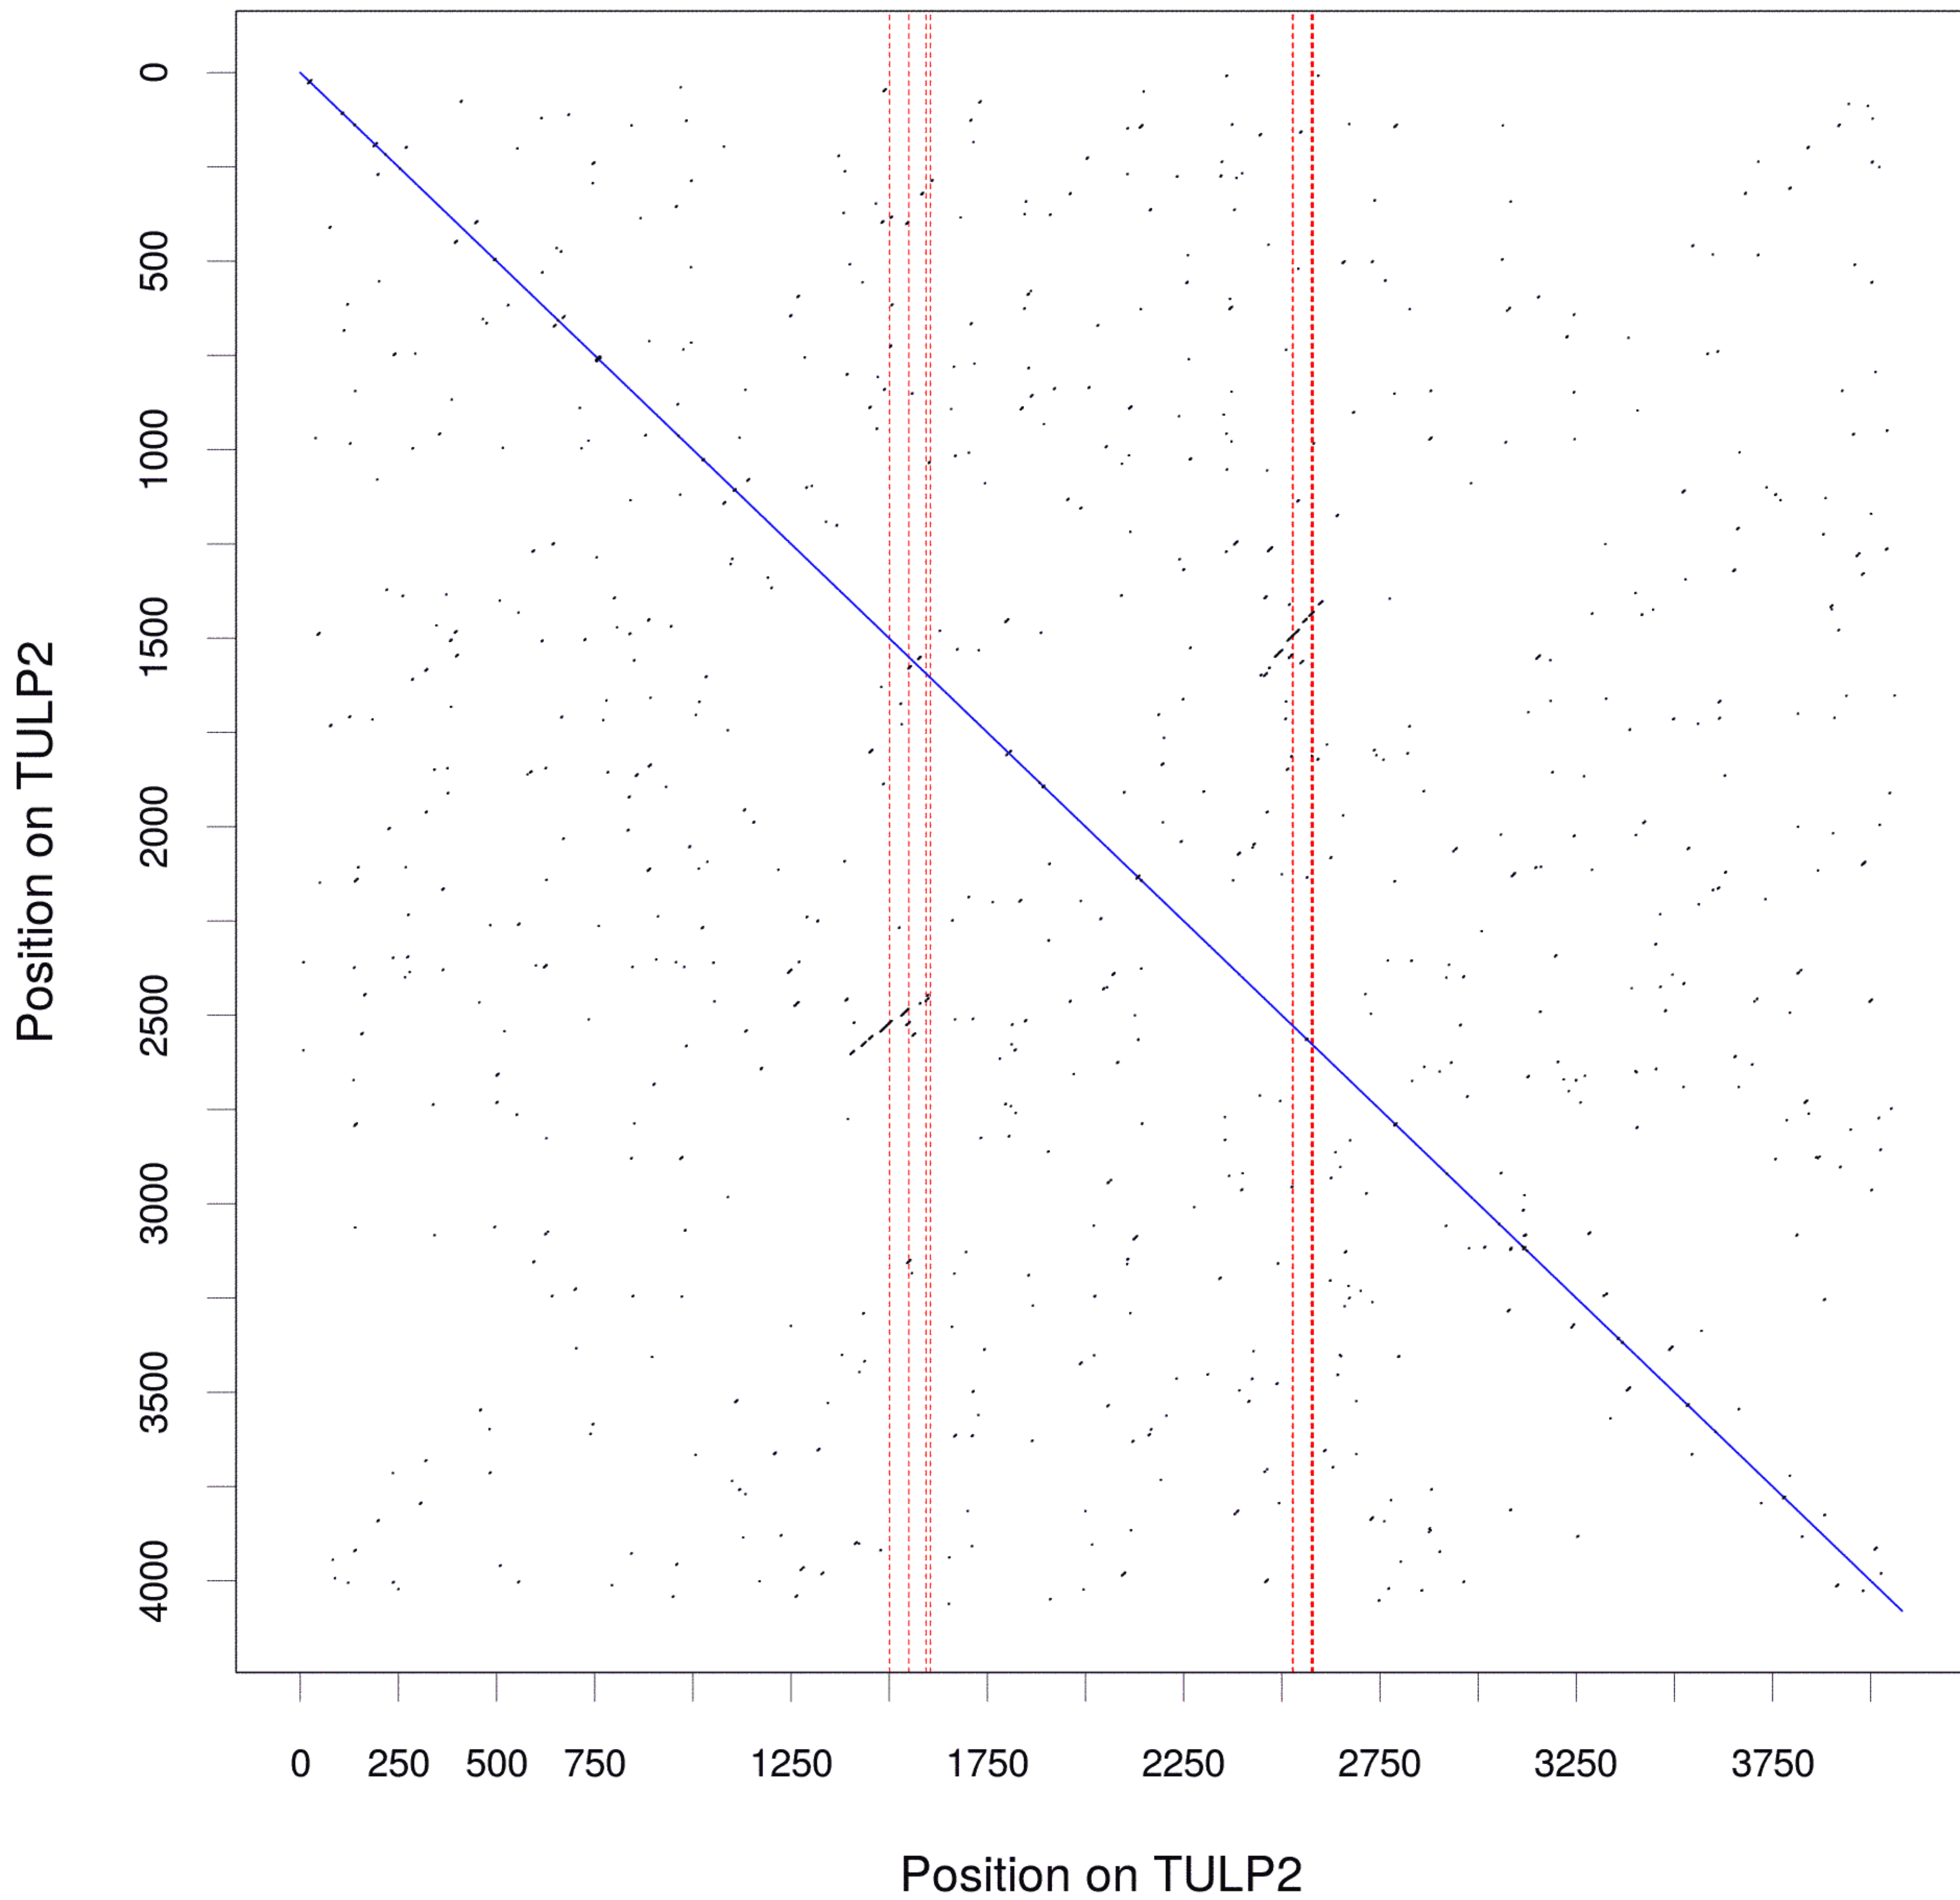

# UBALD2

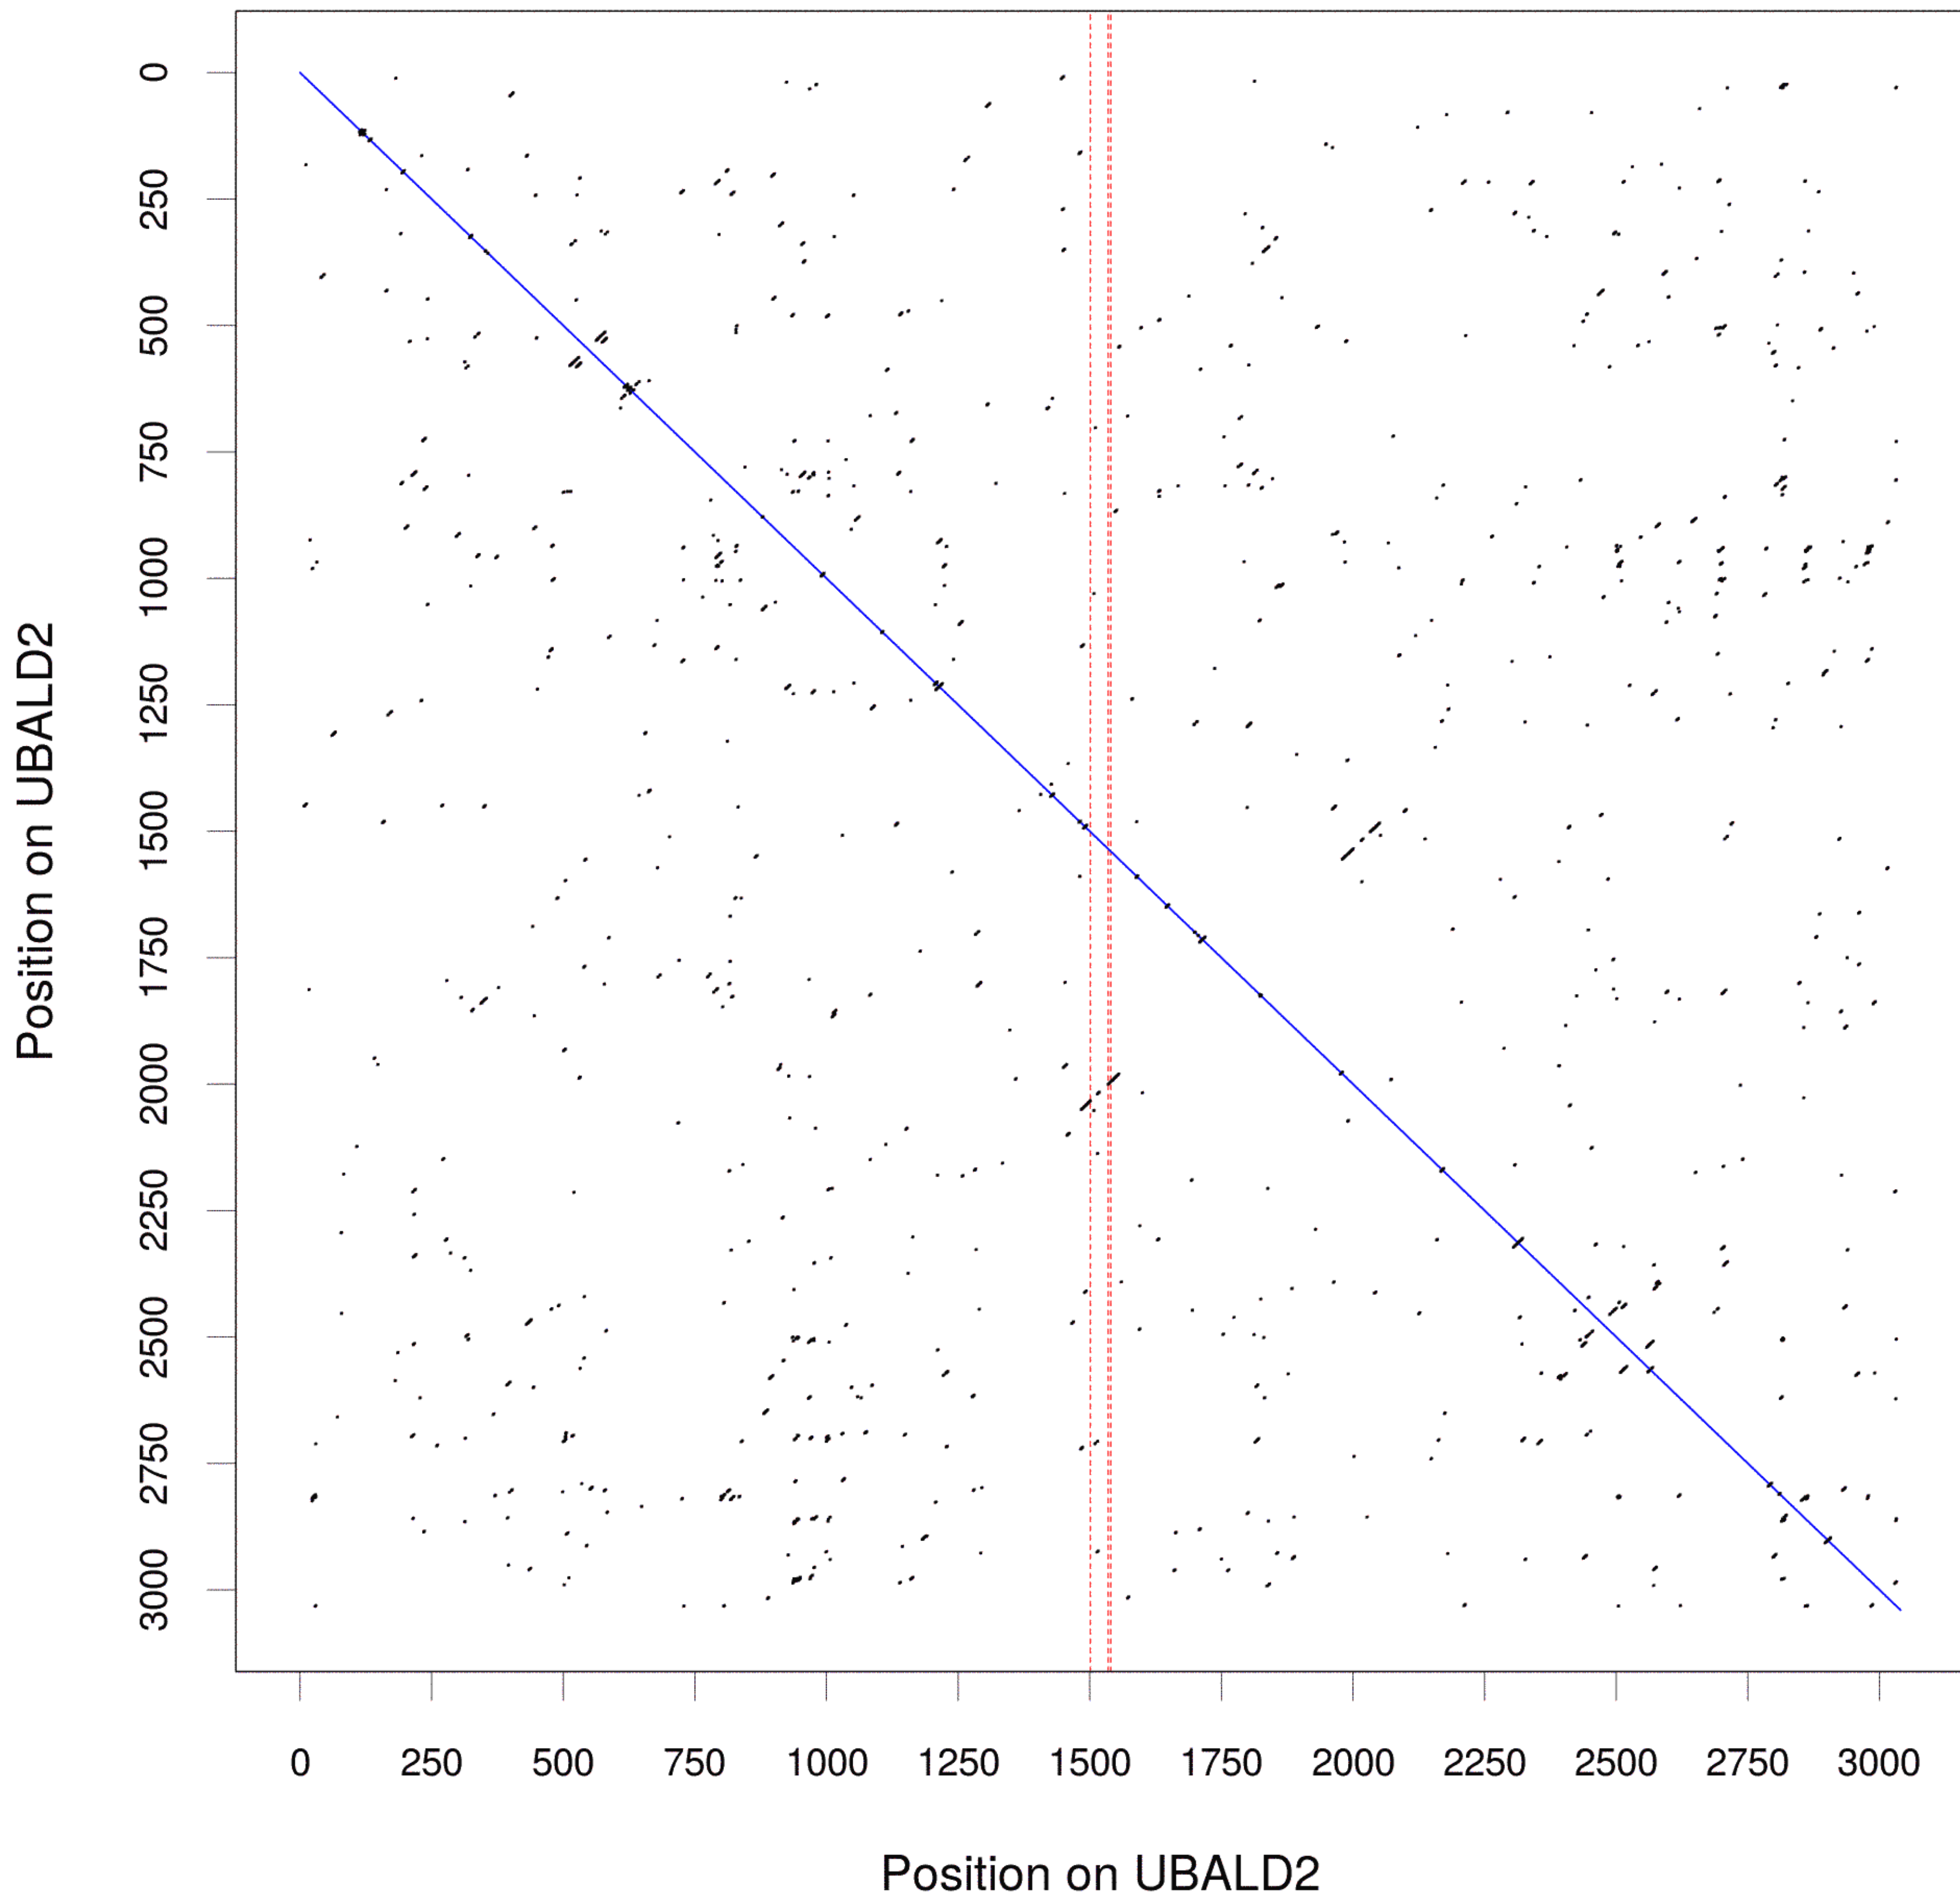

# UFSP2

Position on UFSP2

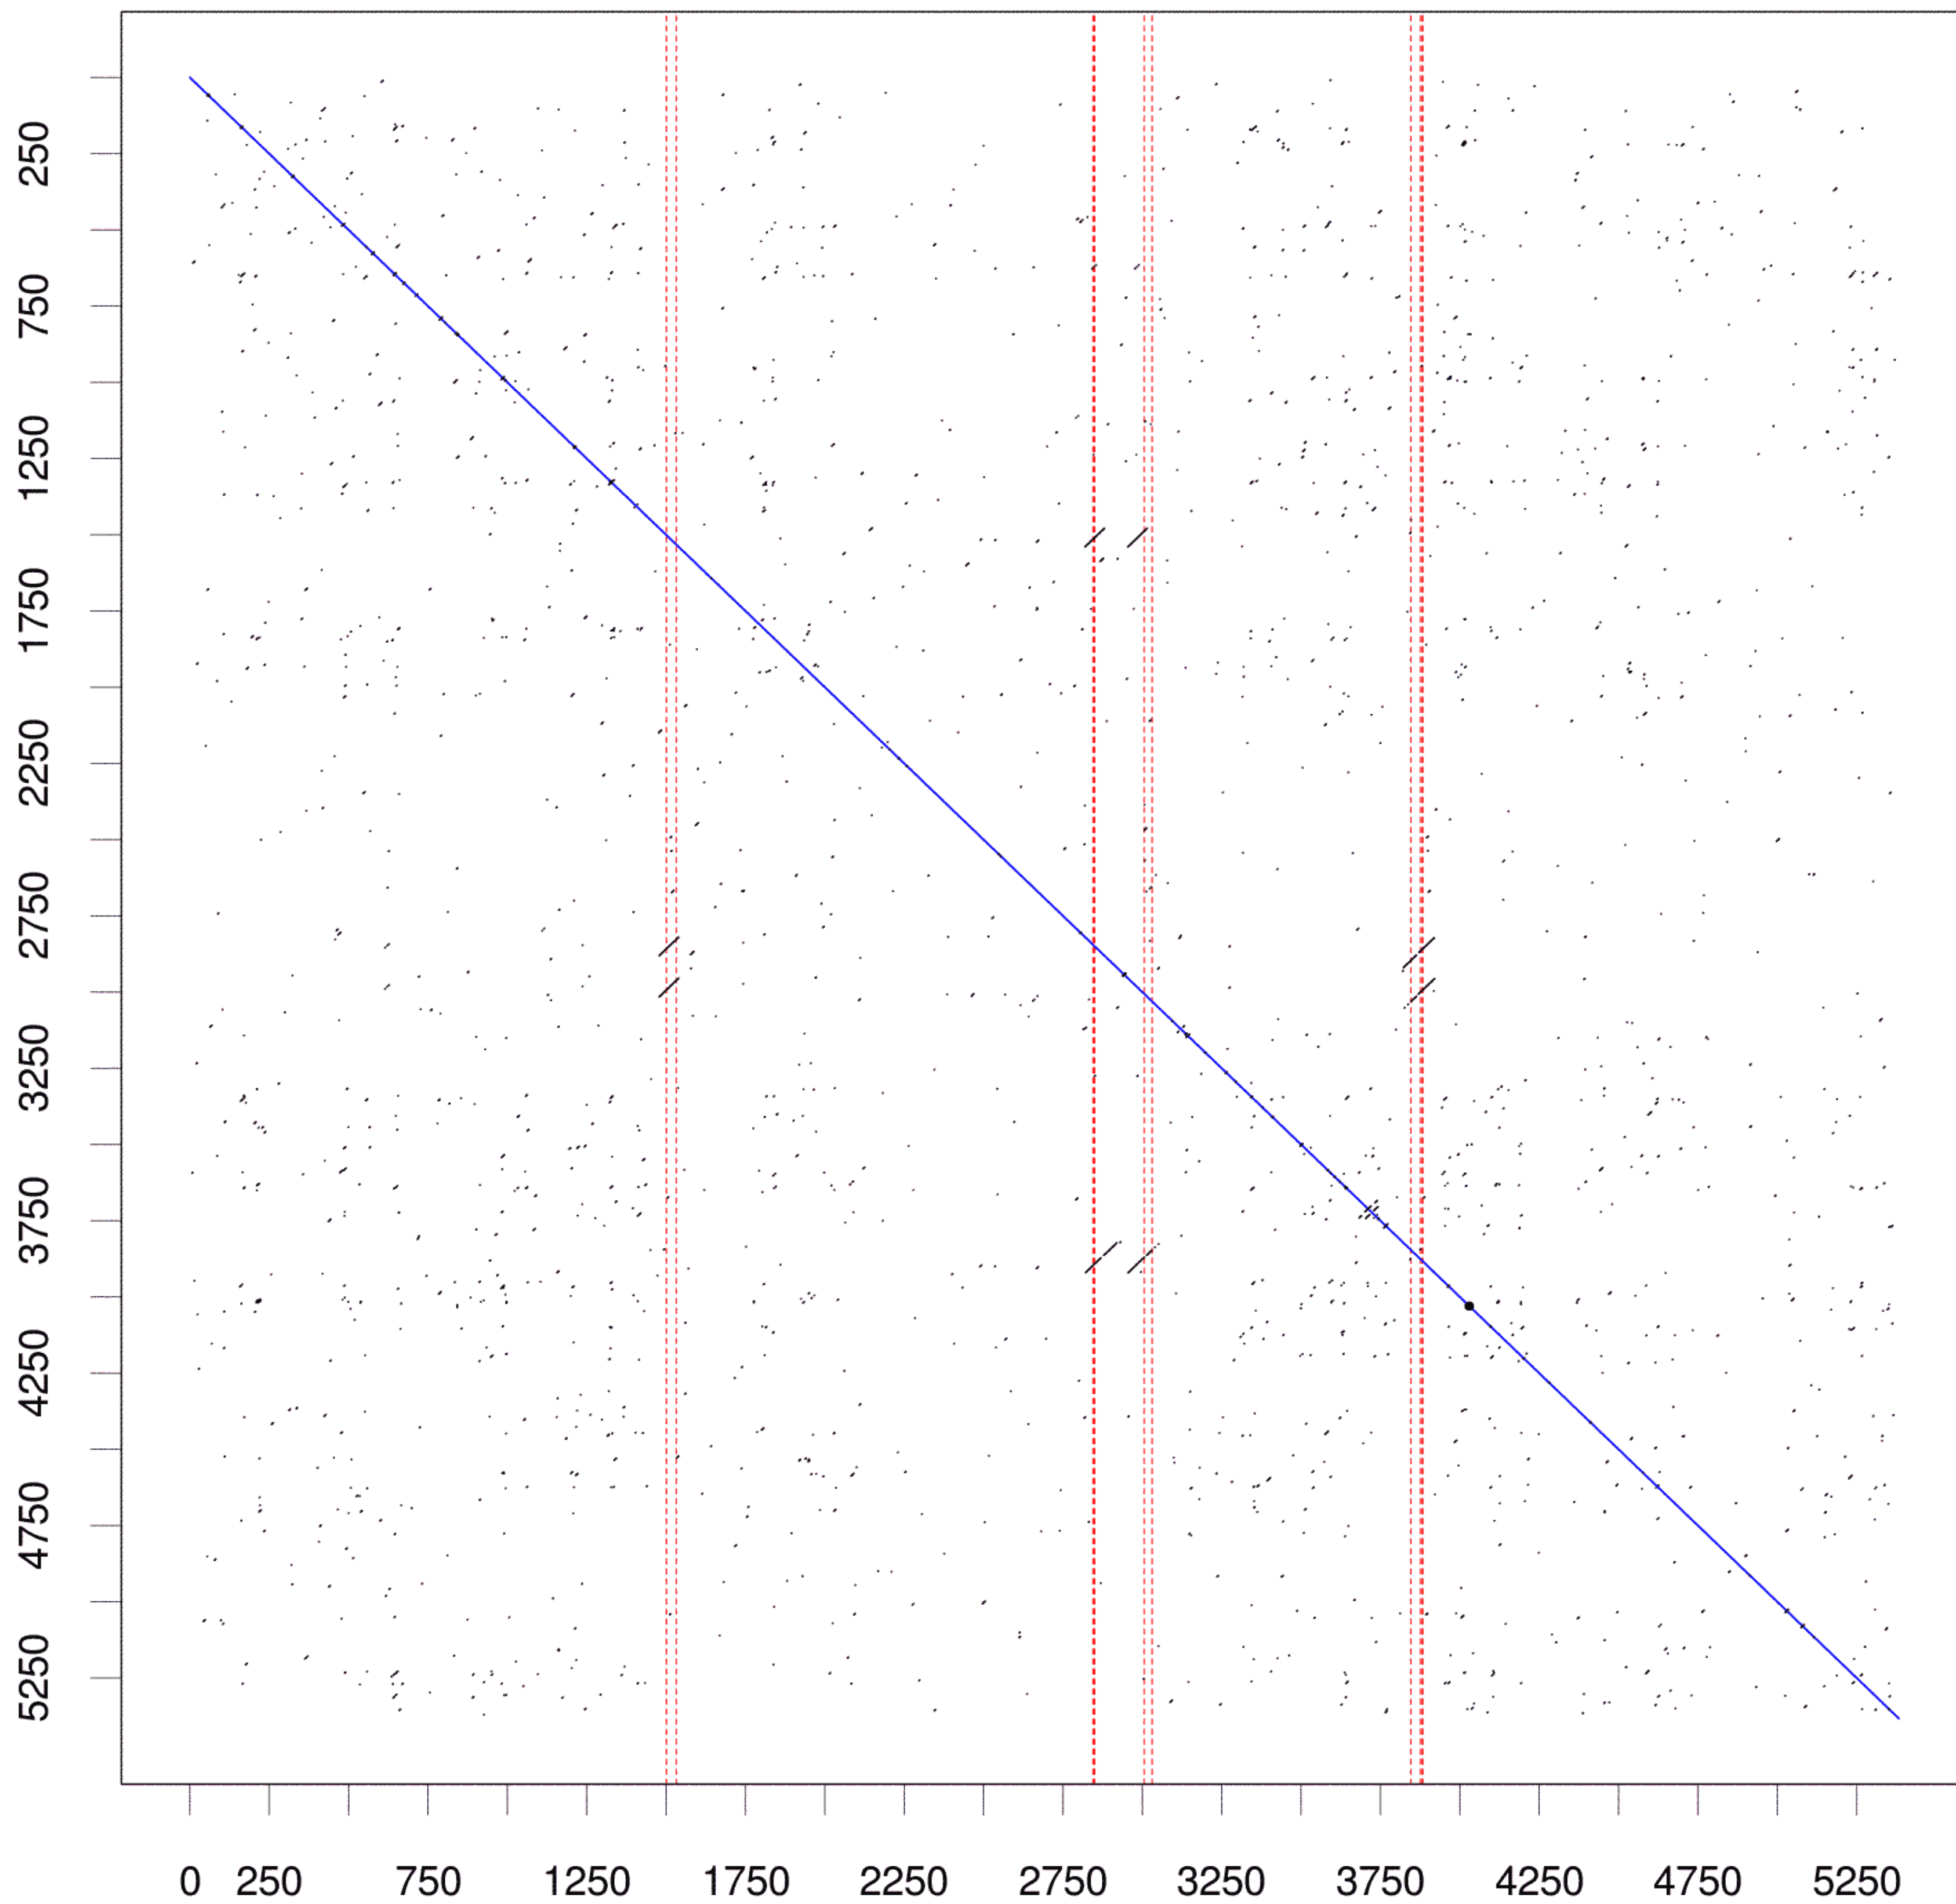

Position on UFSP2

# UNC50

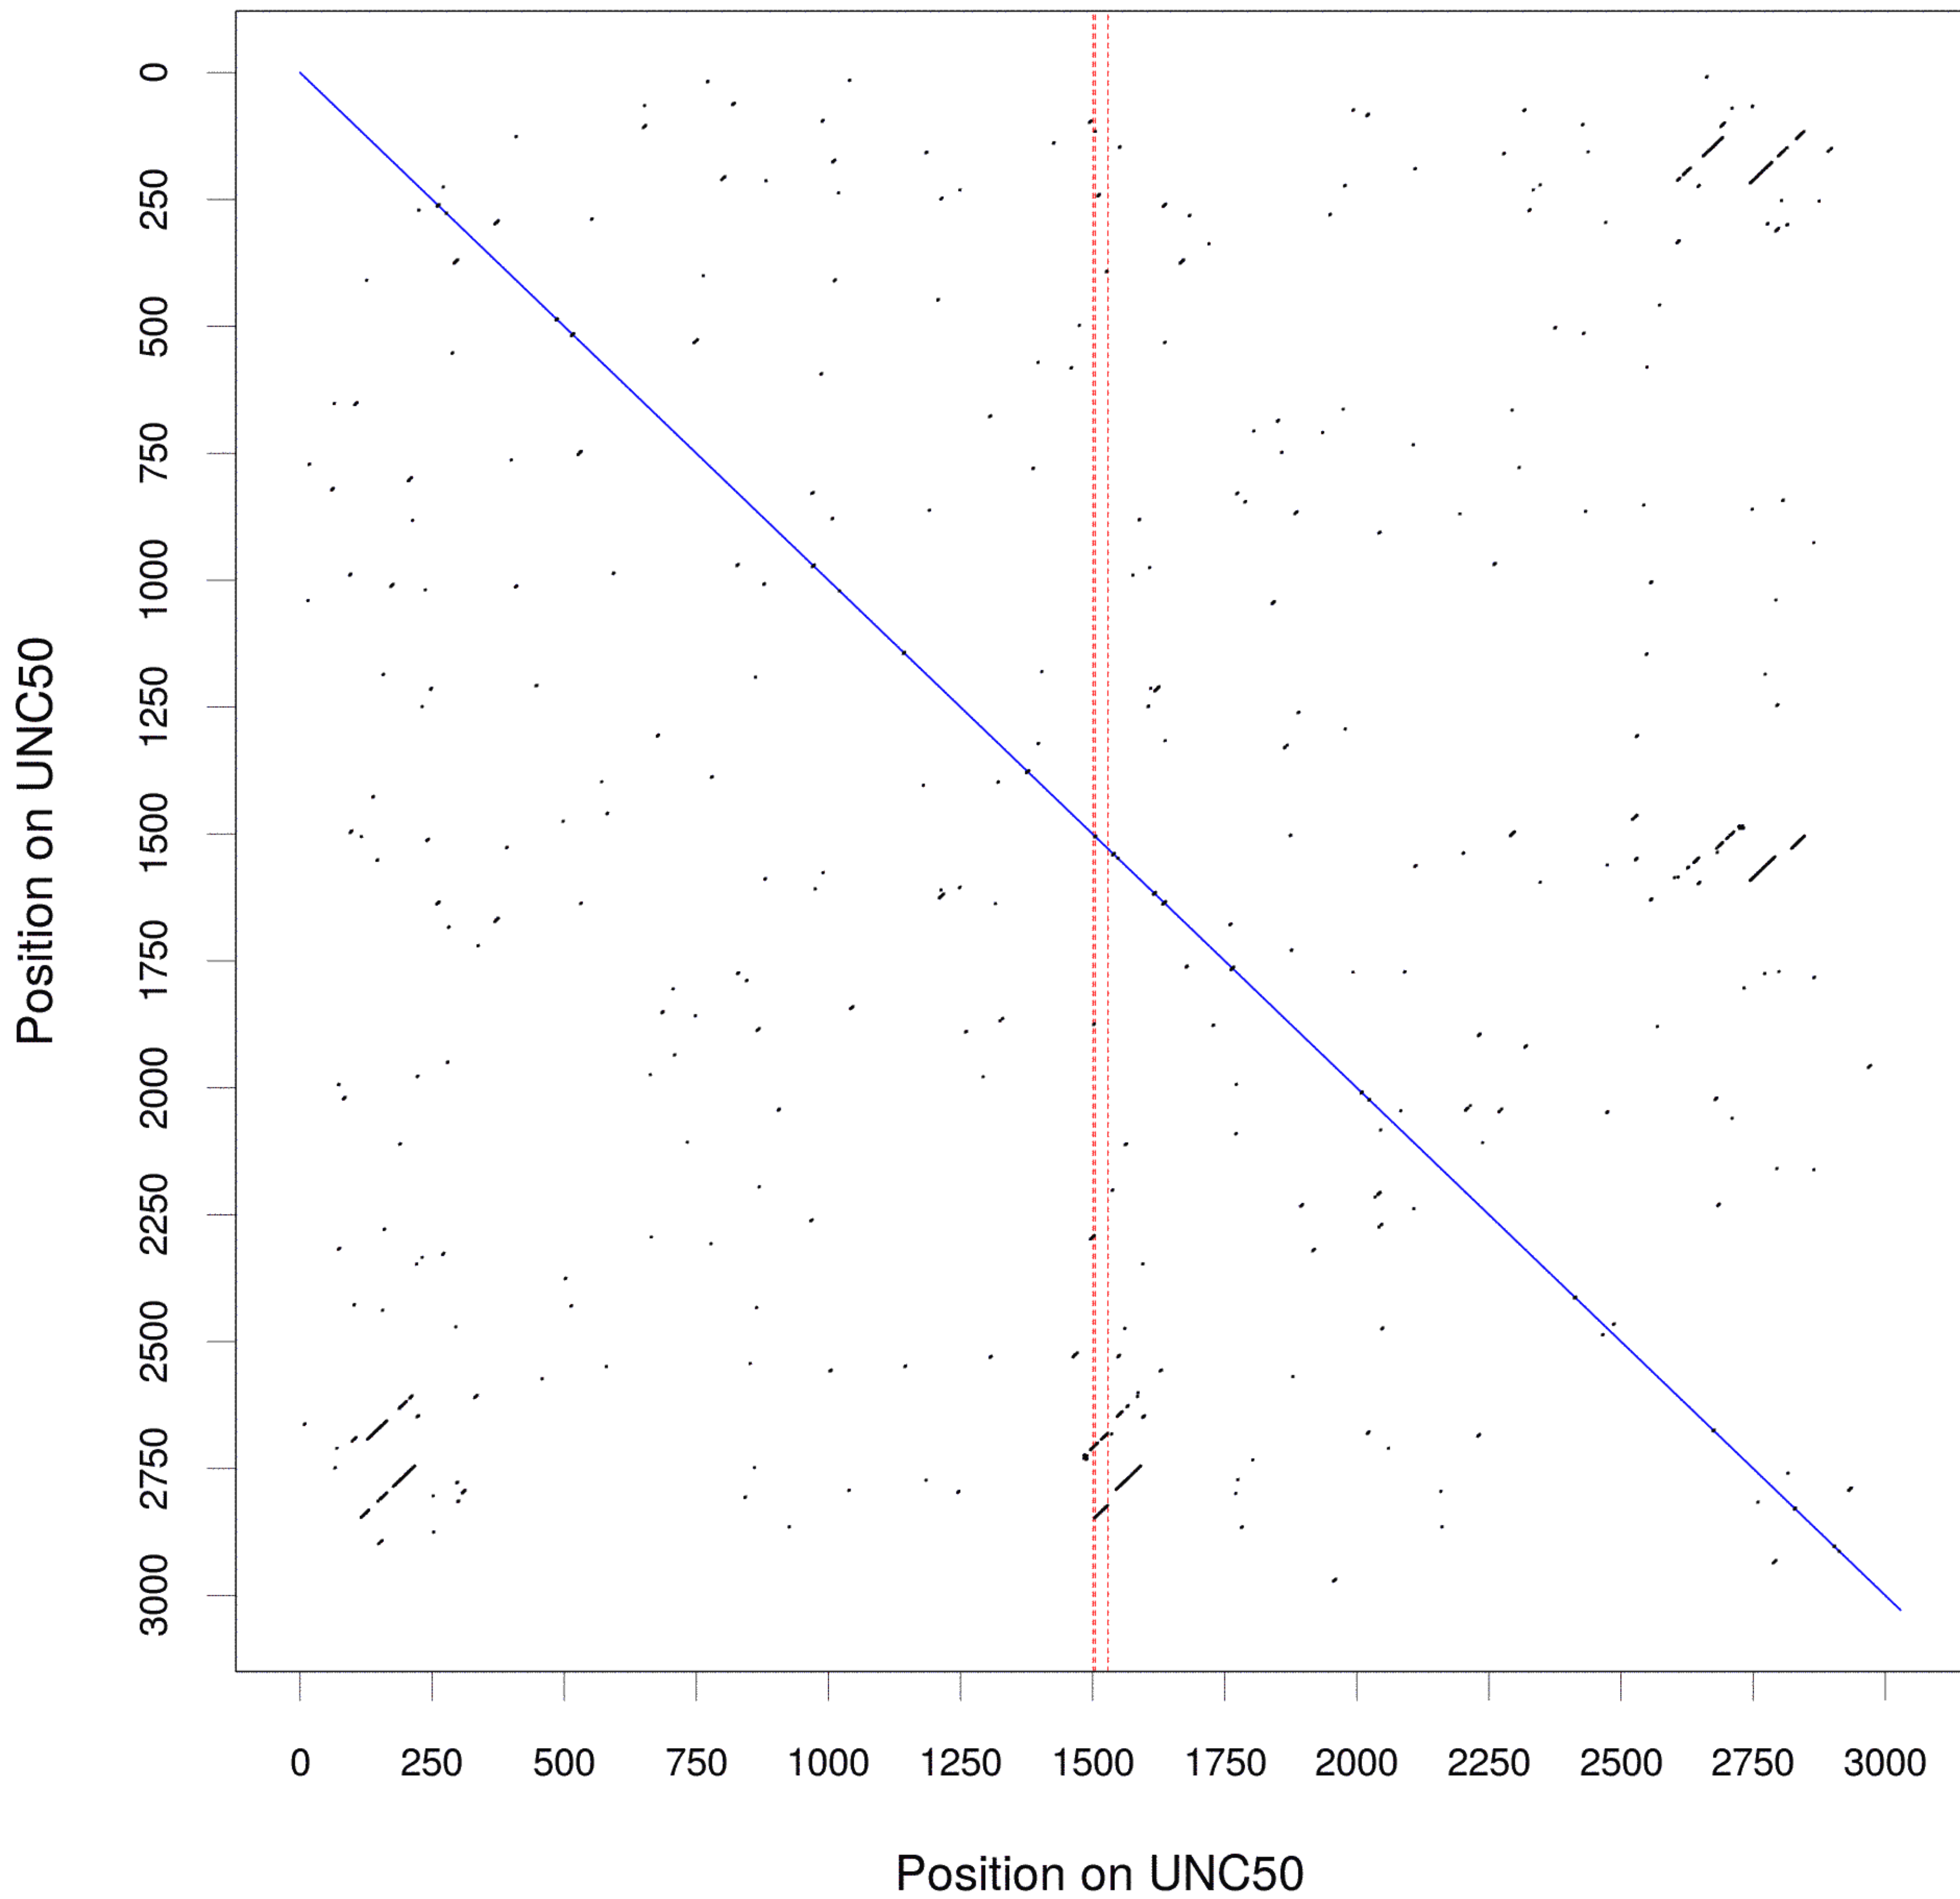

# URB2

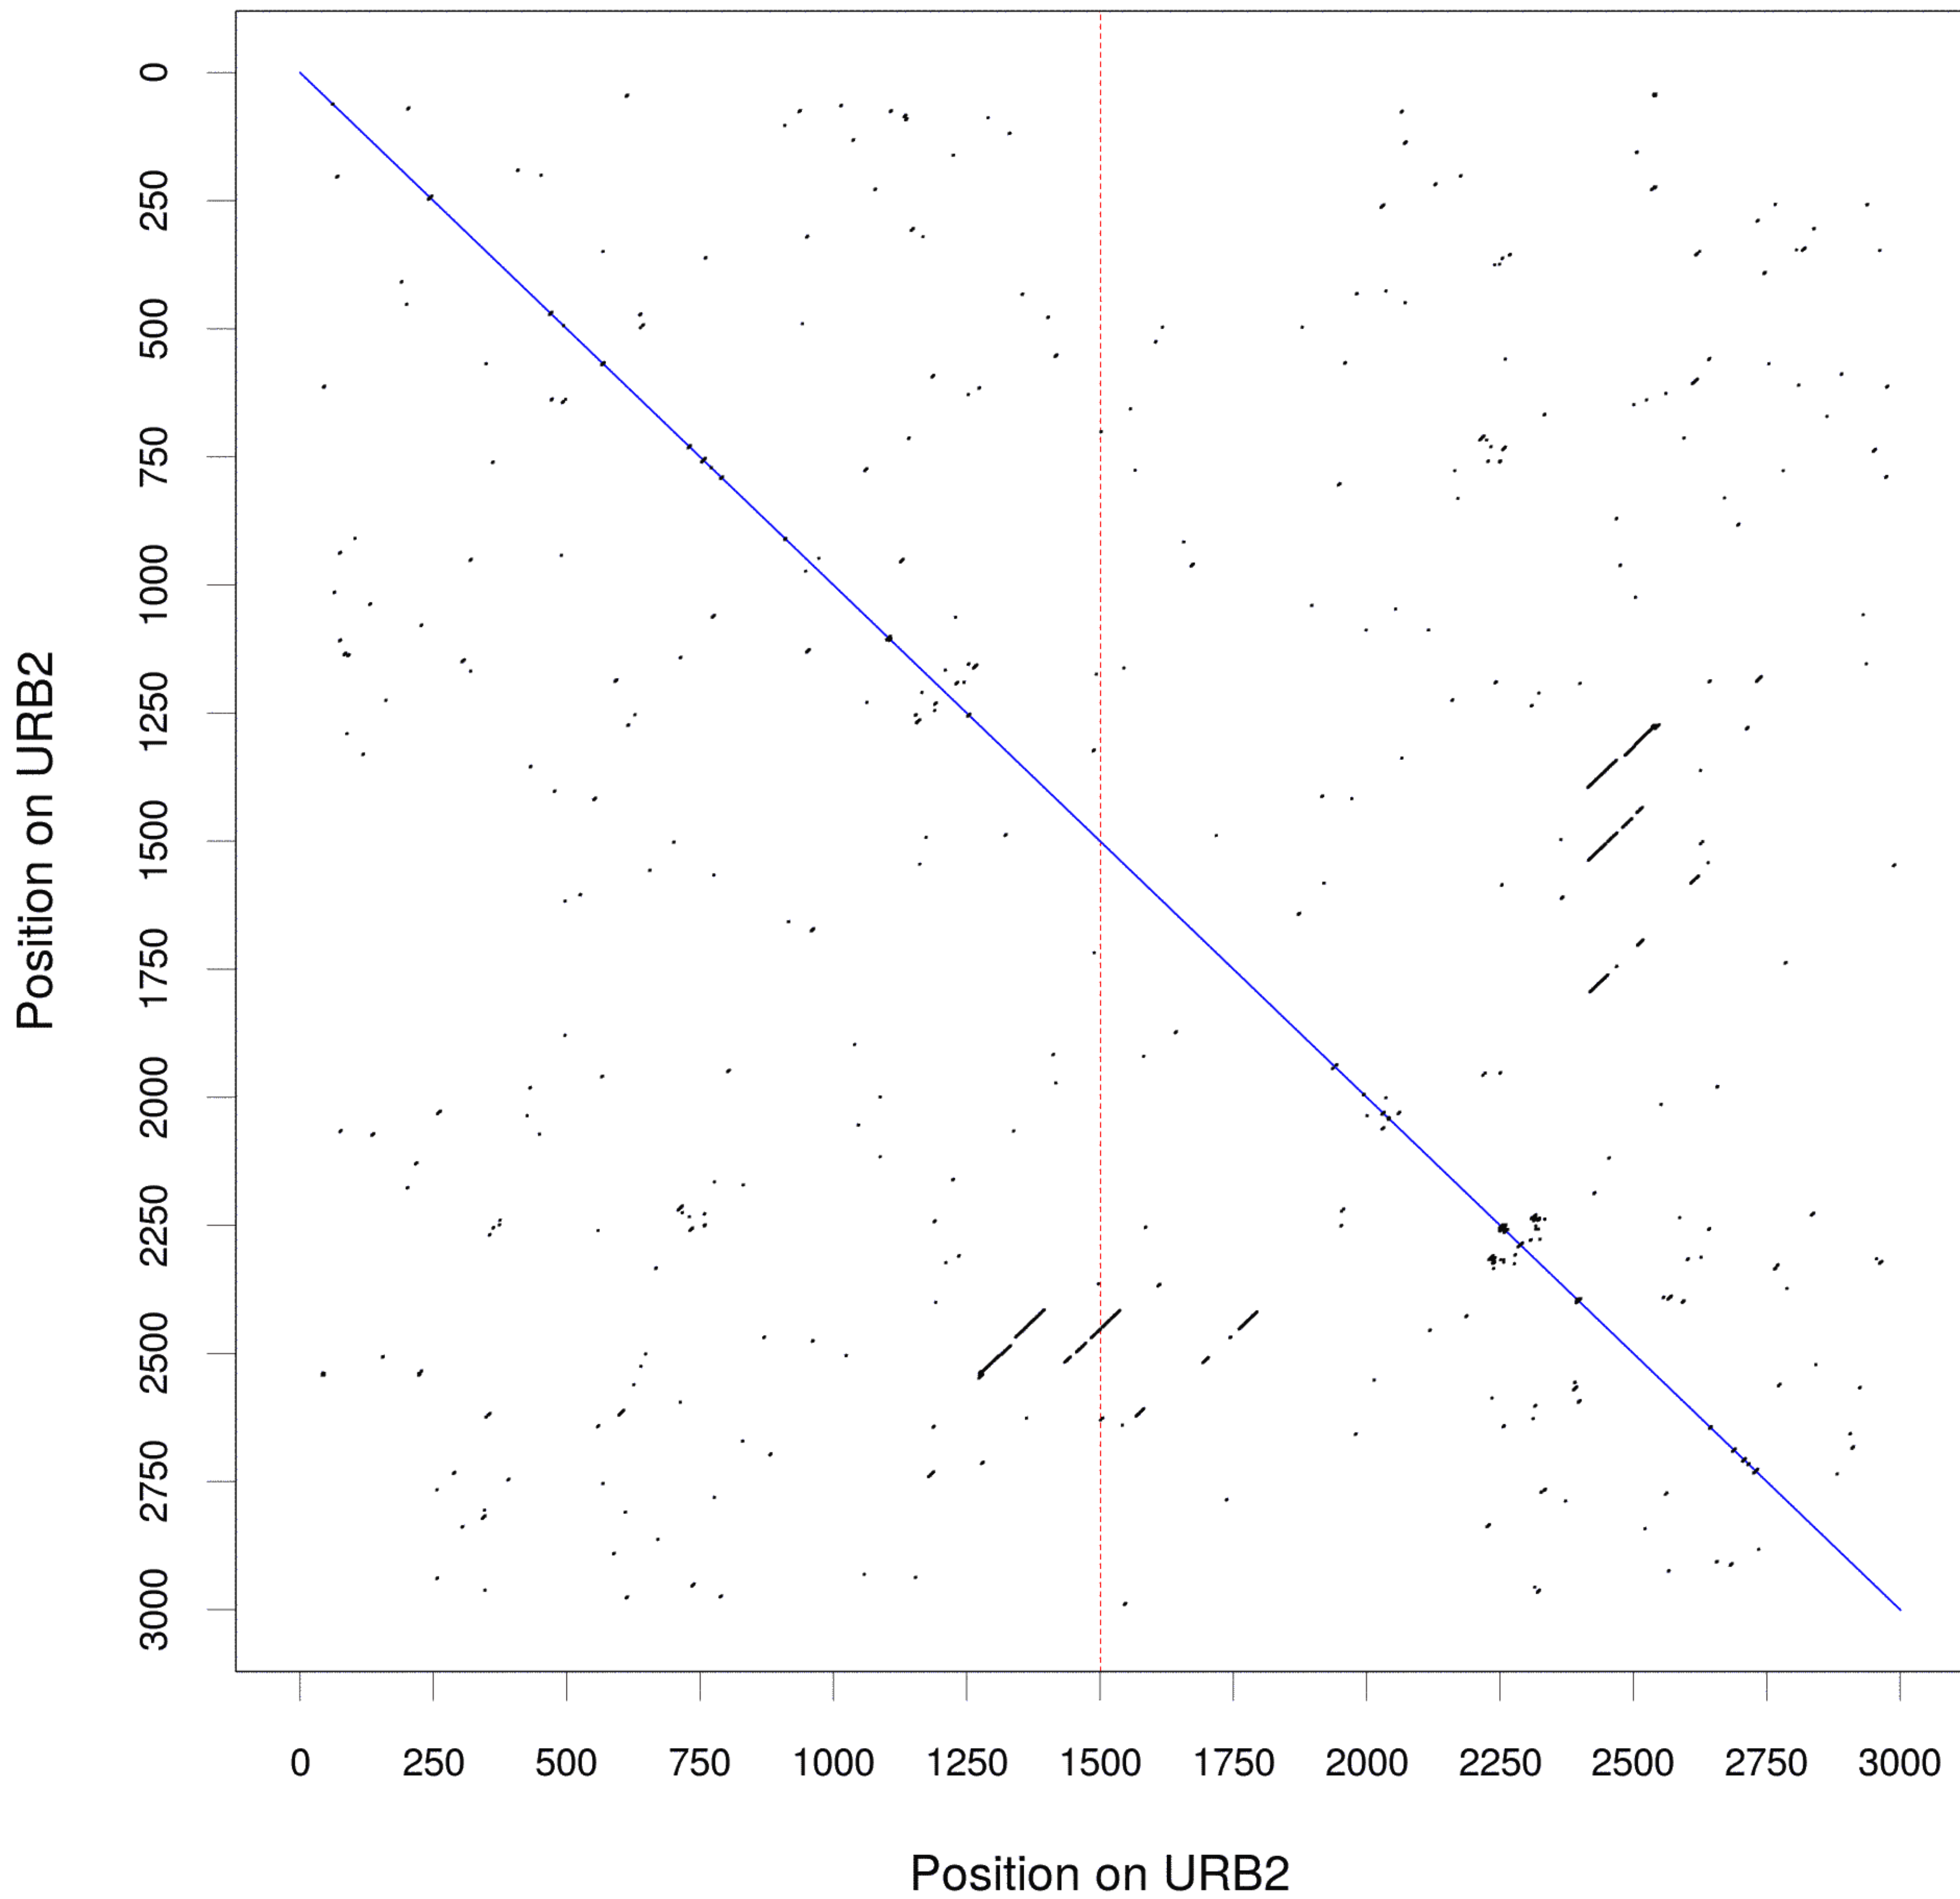

# VAMP5

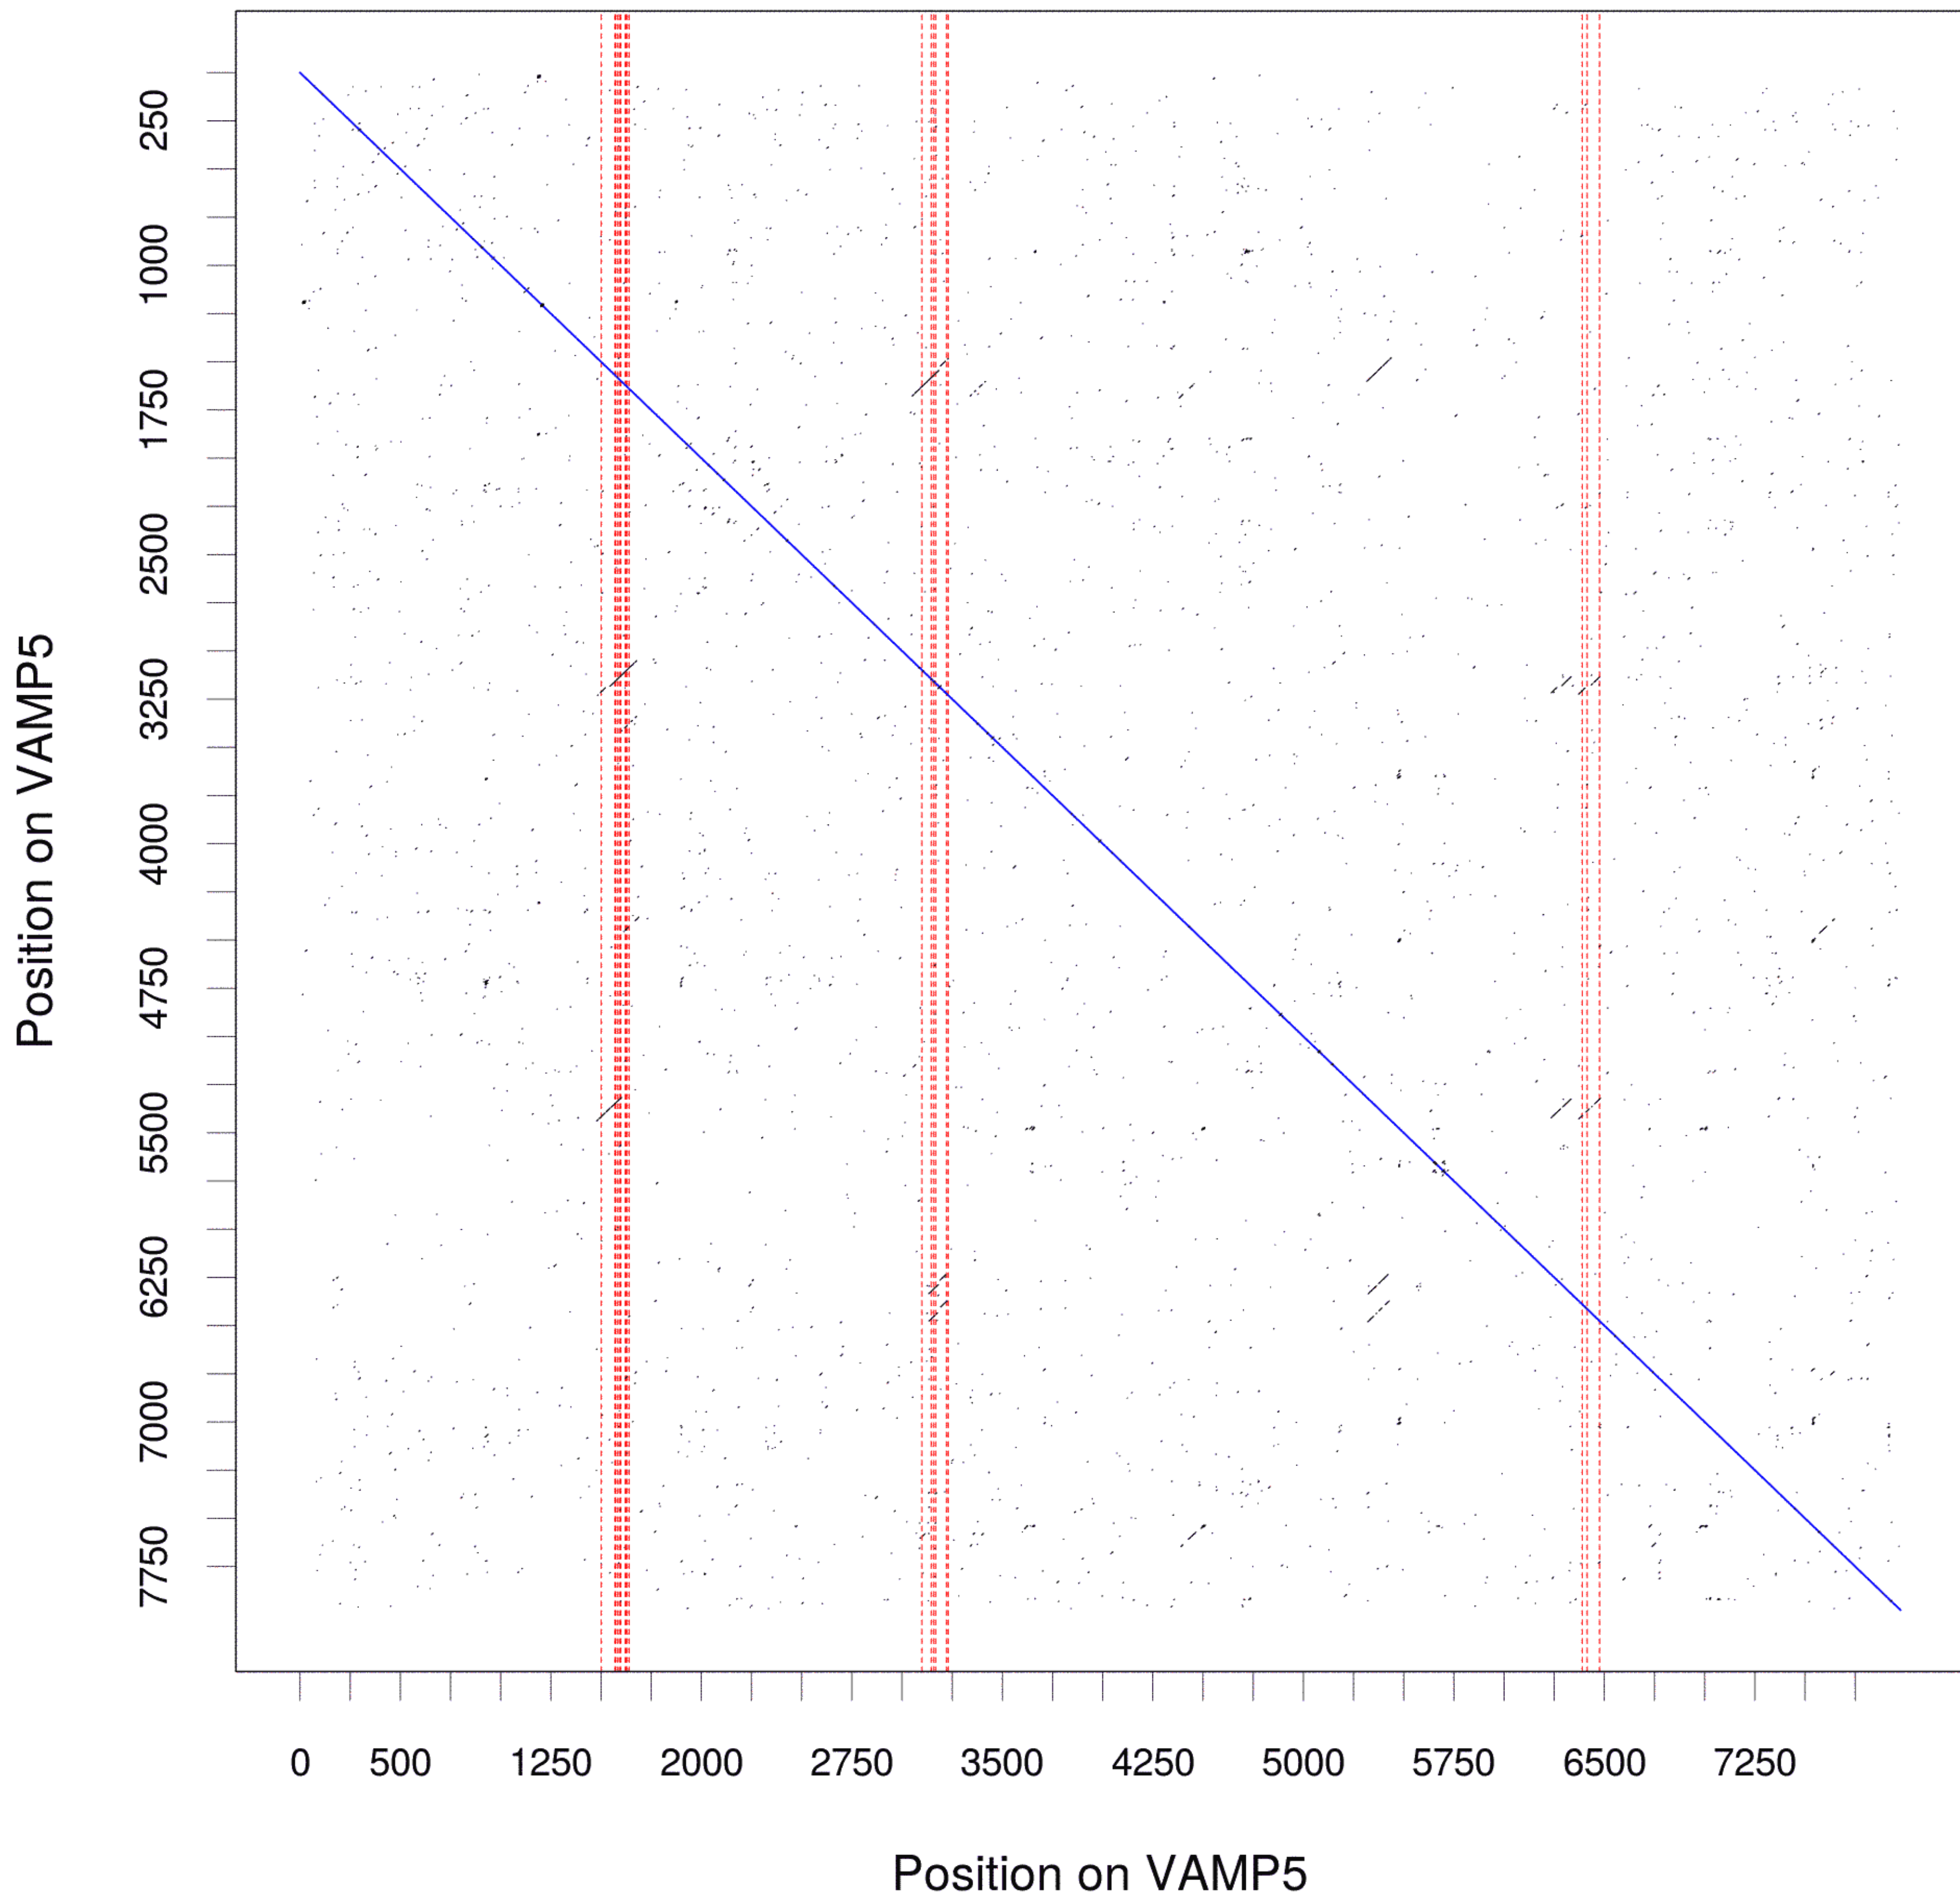

# VPS11

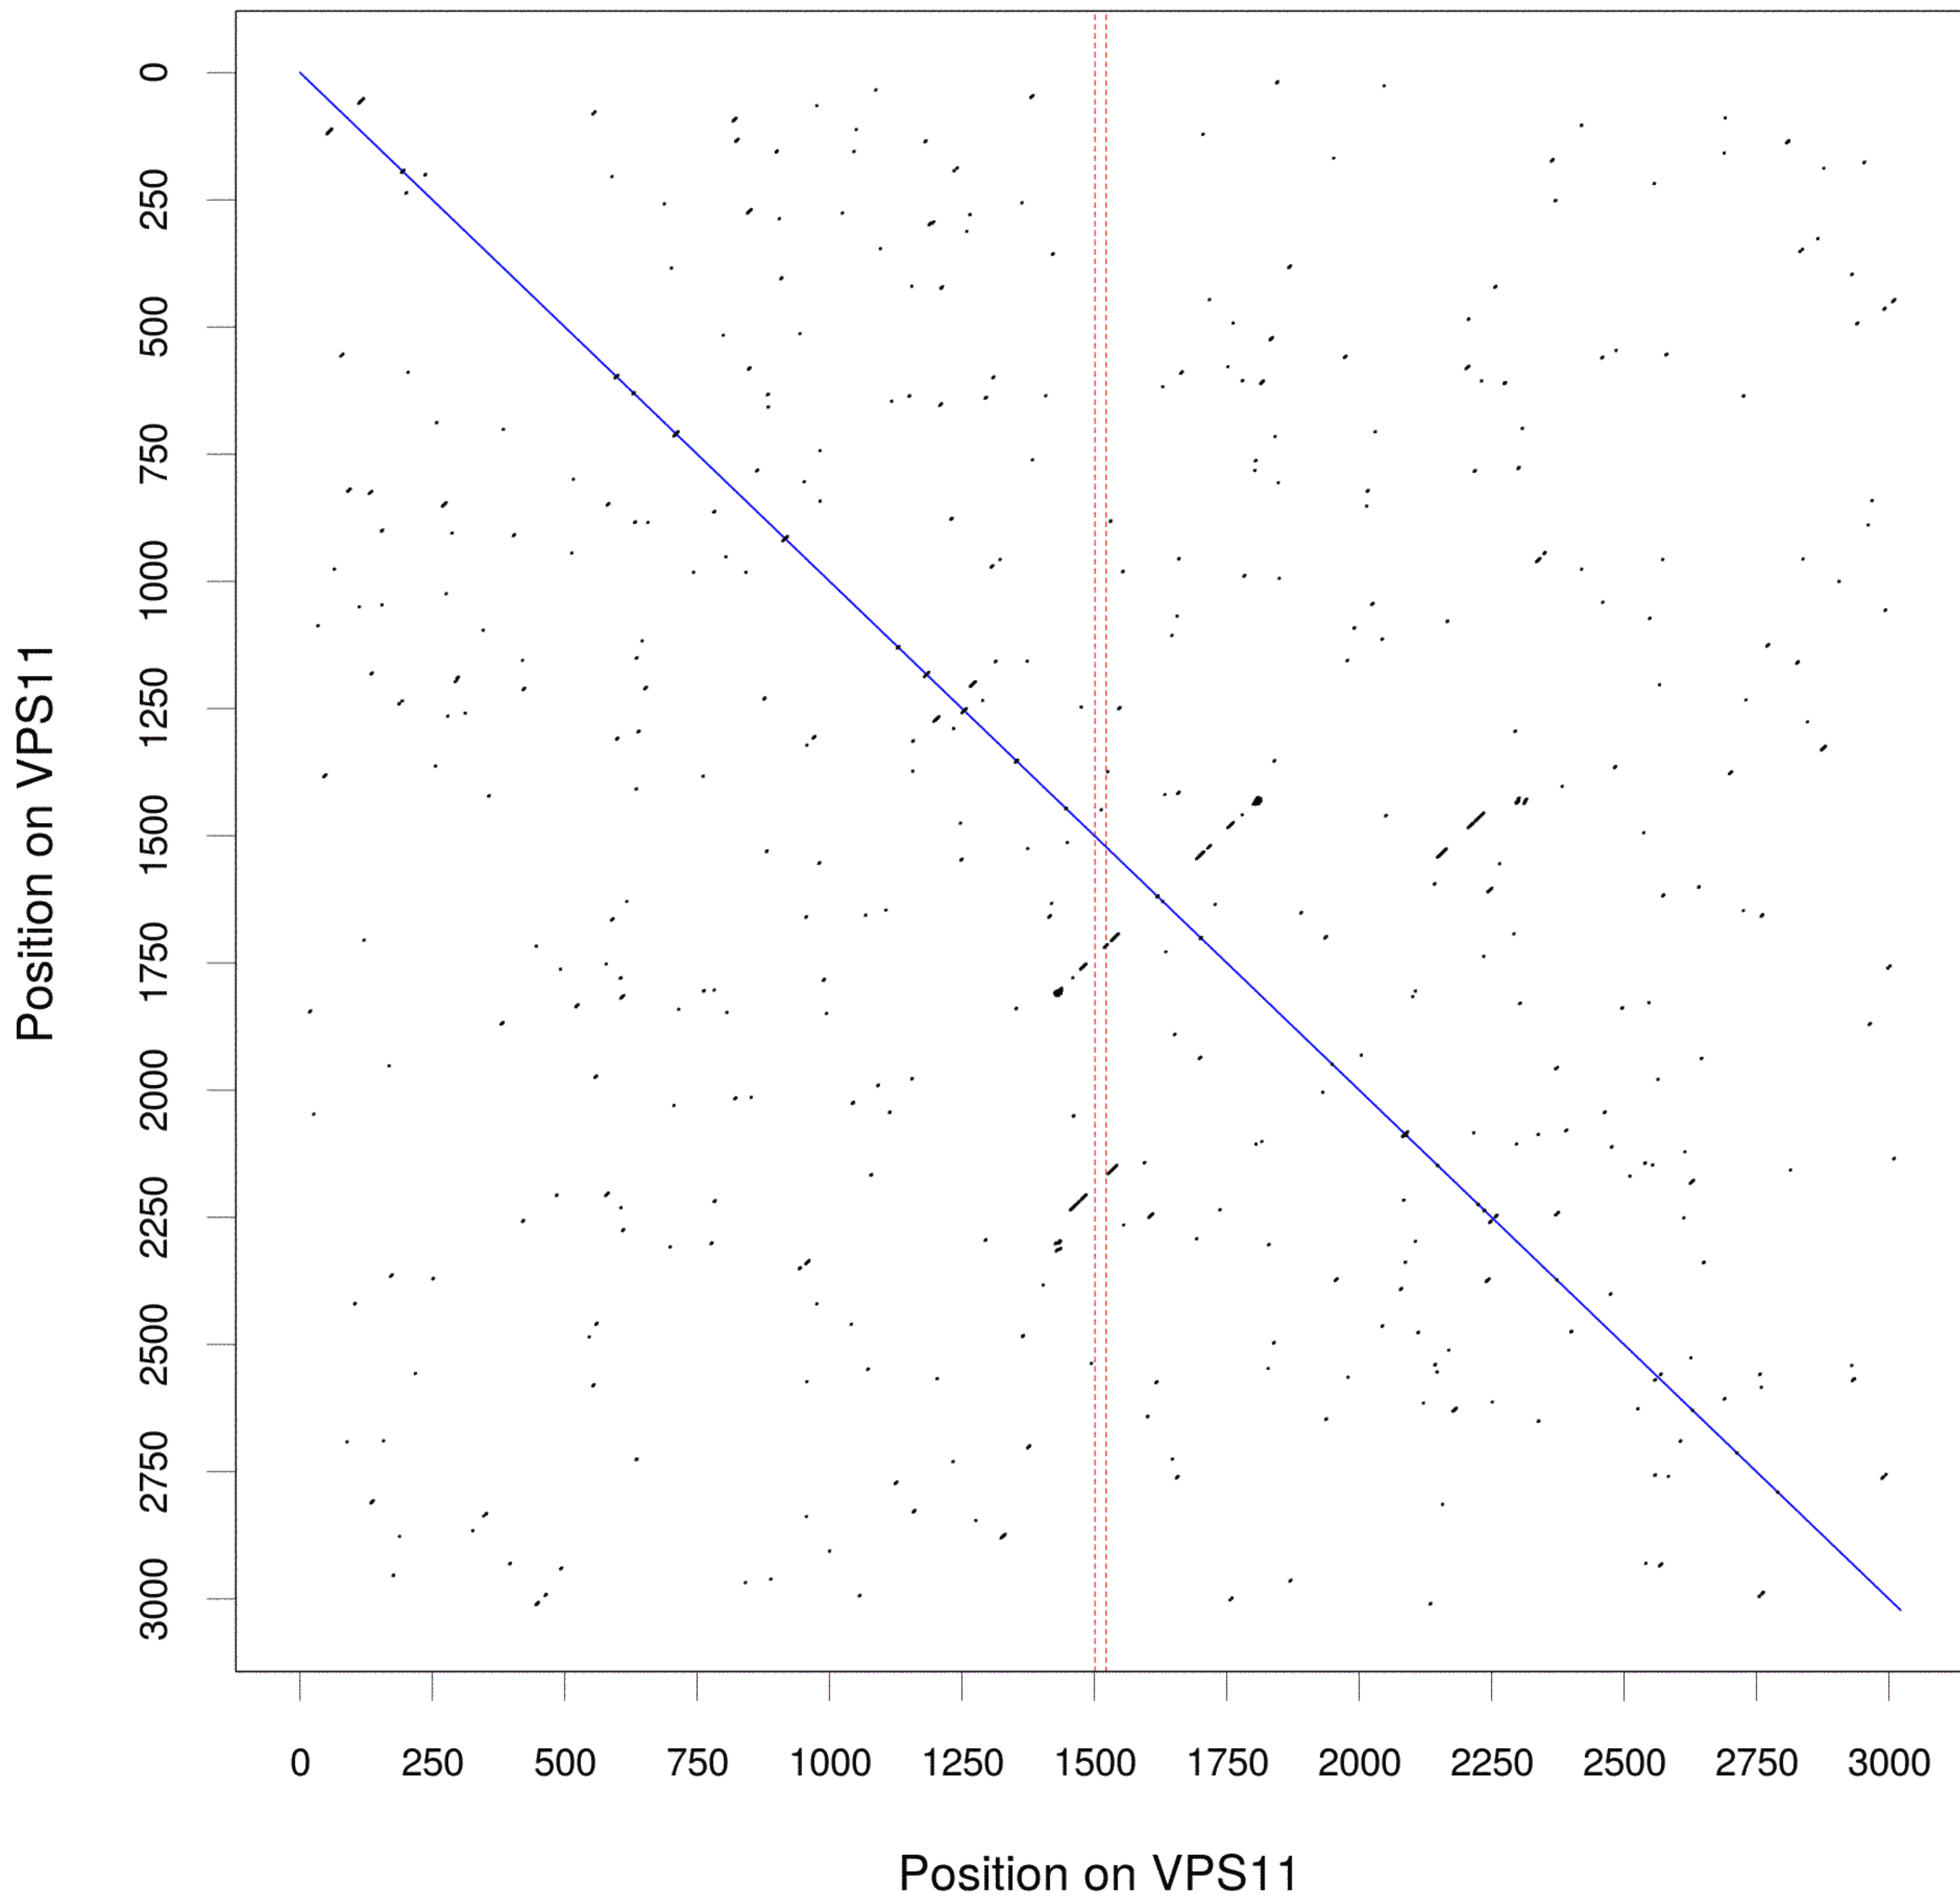

# VPS72

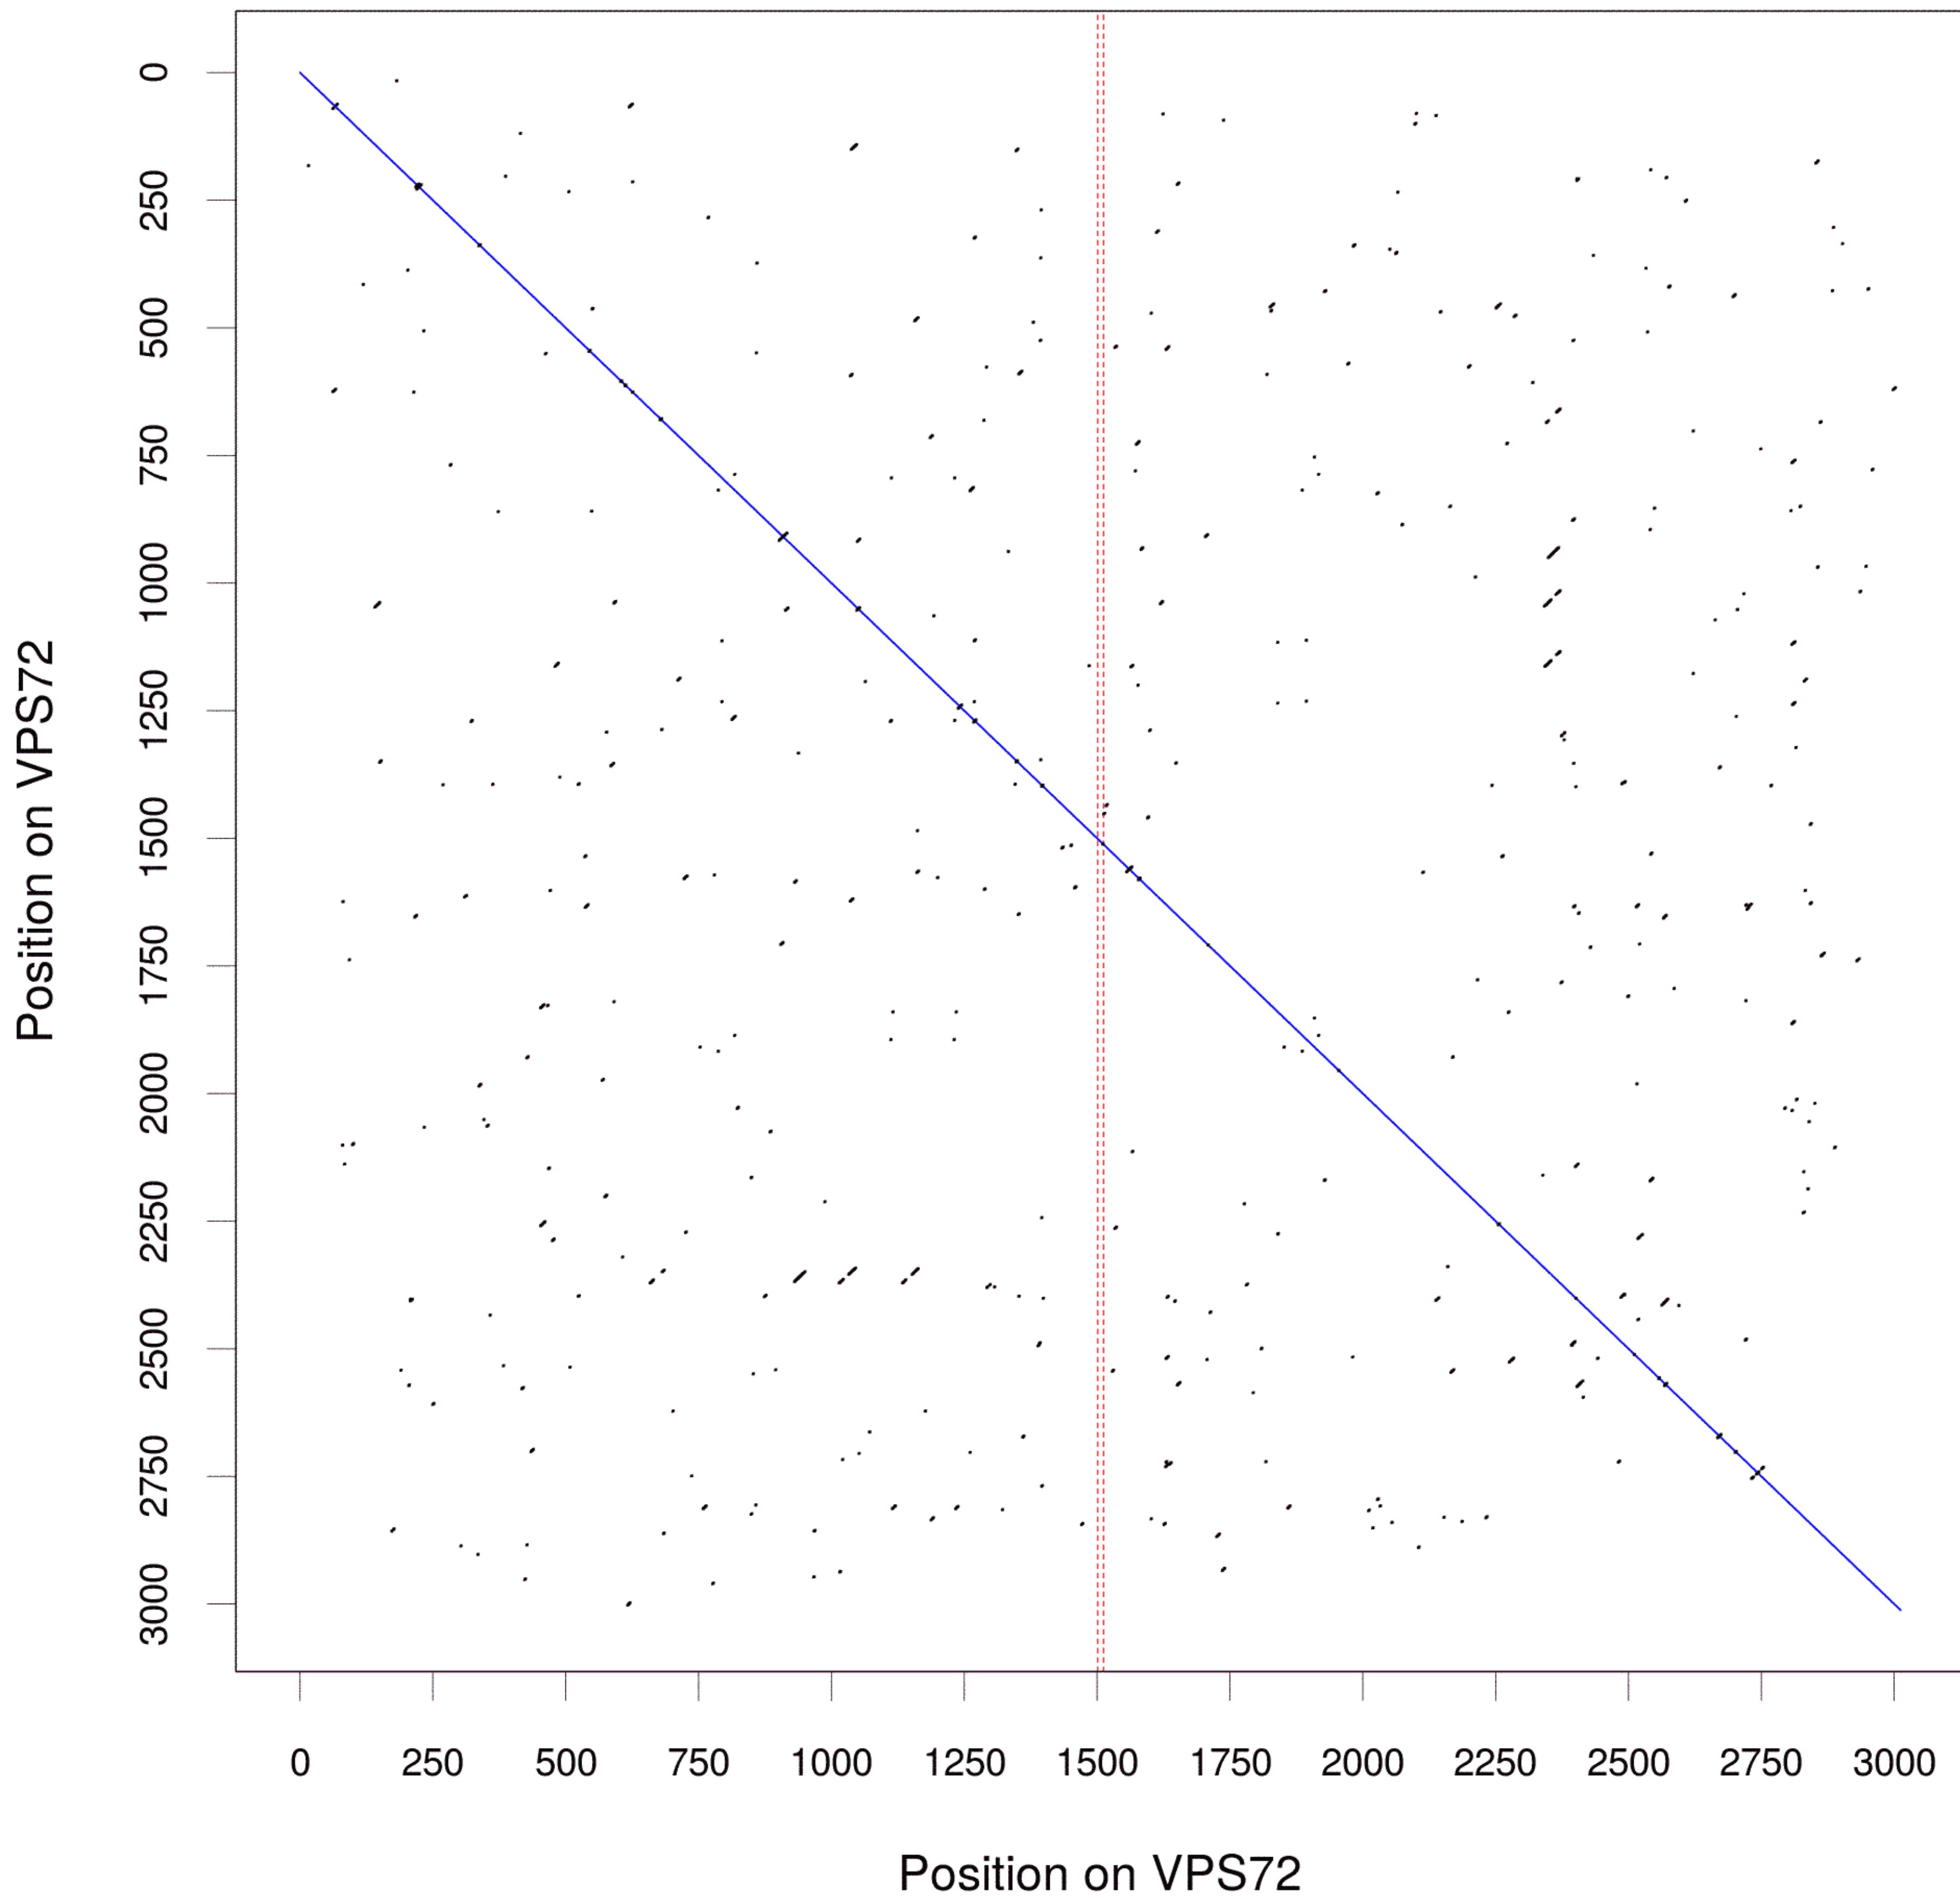



# VTI1B

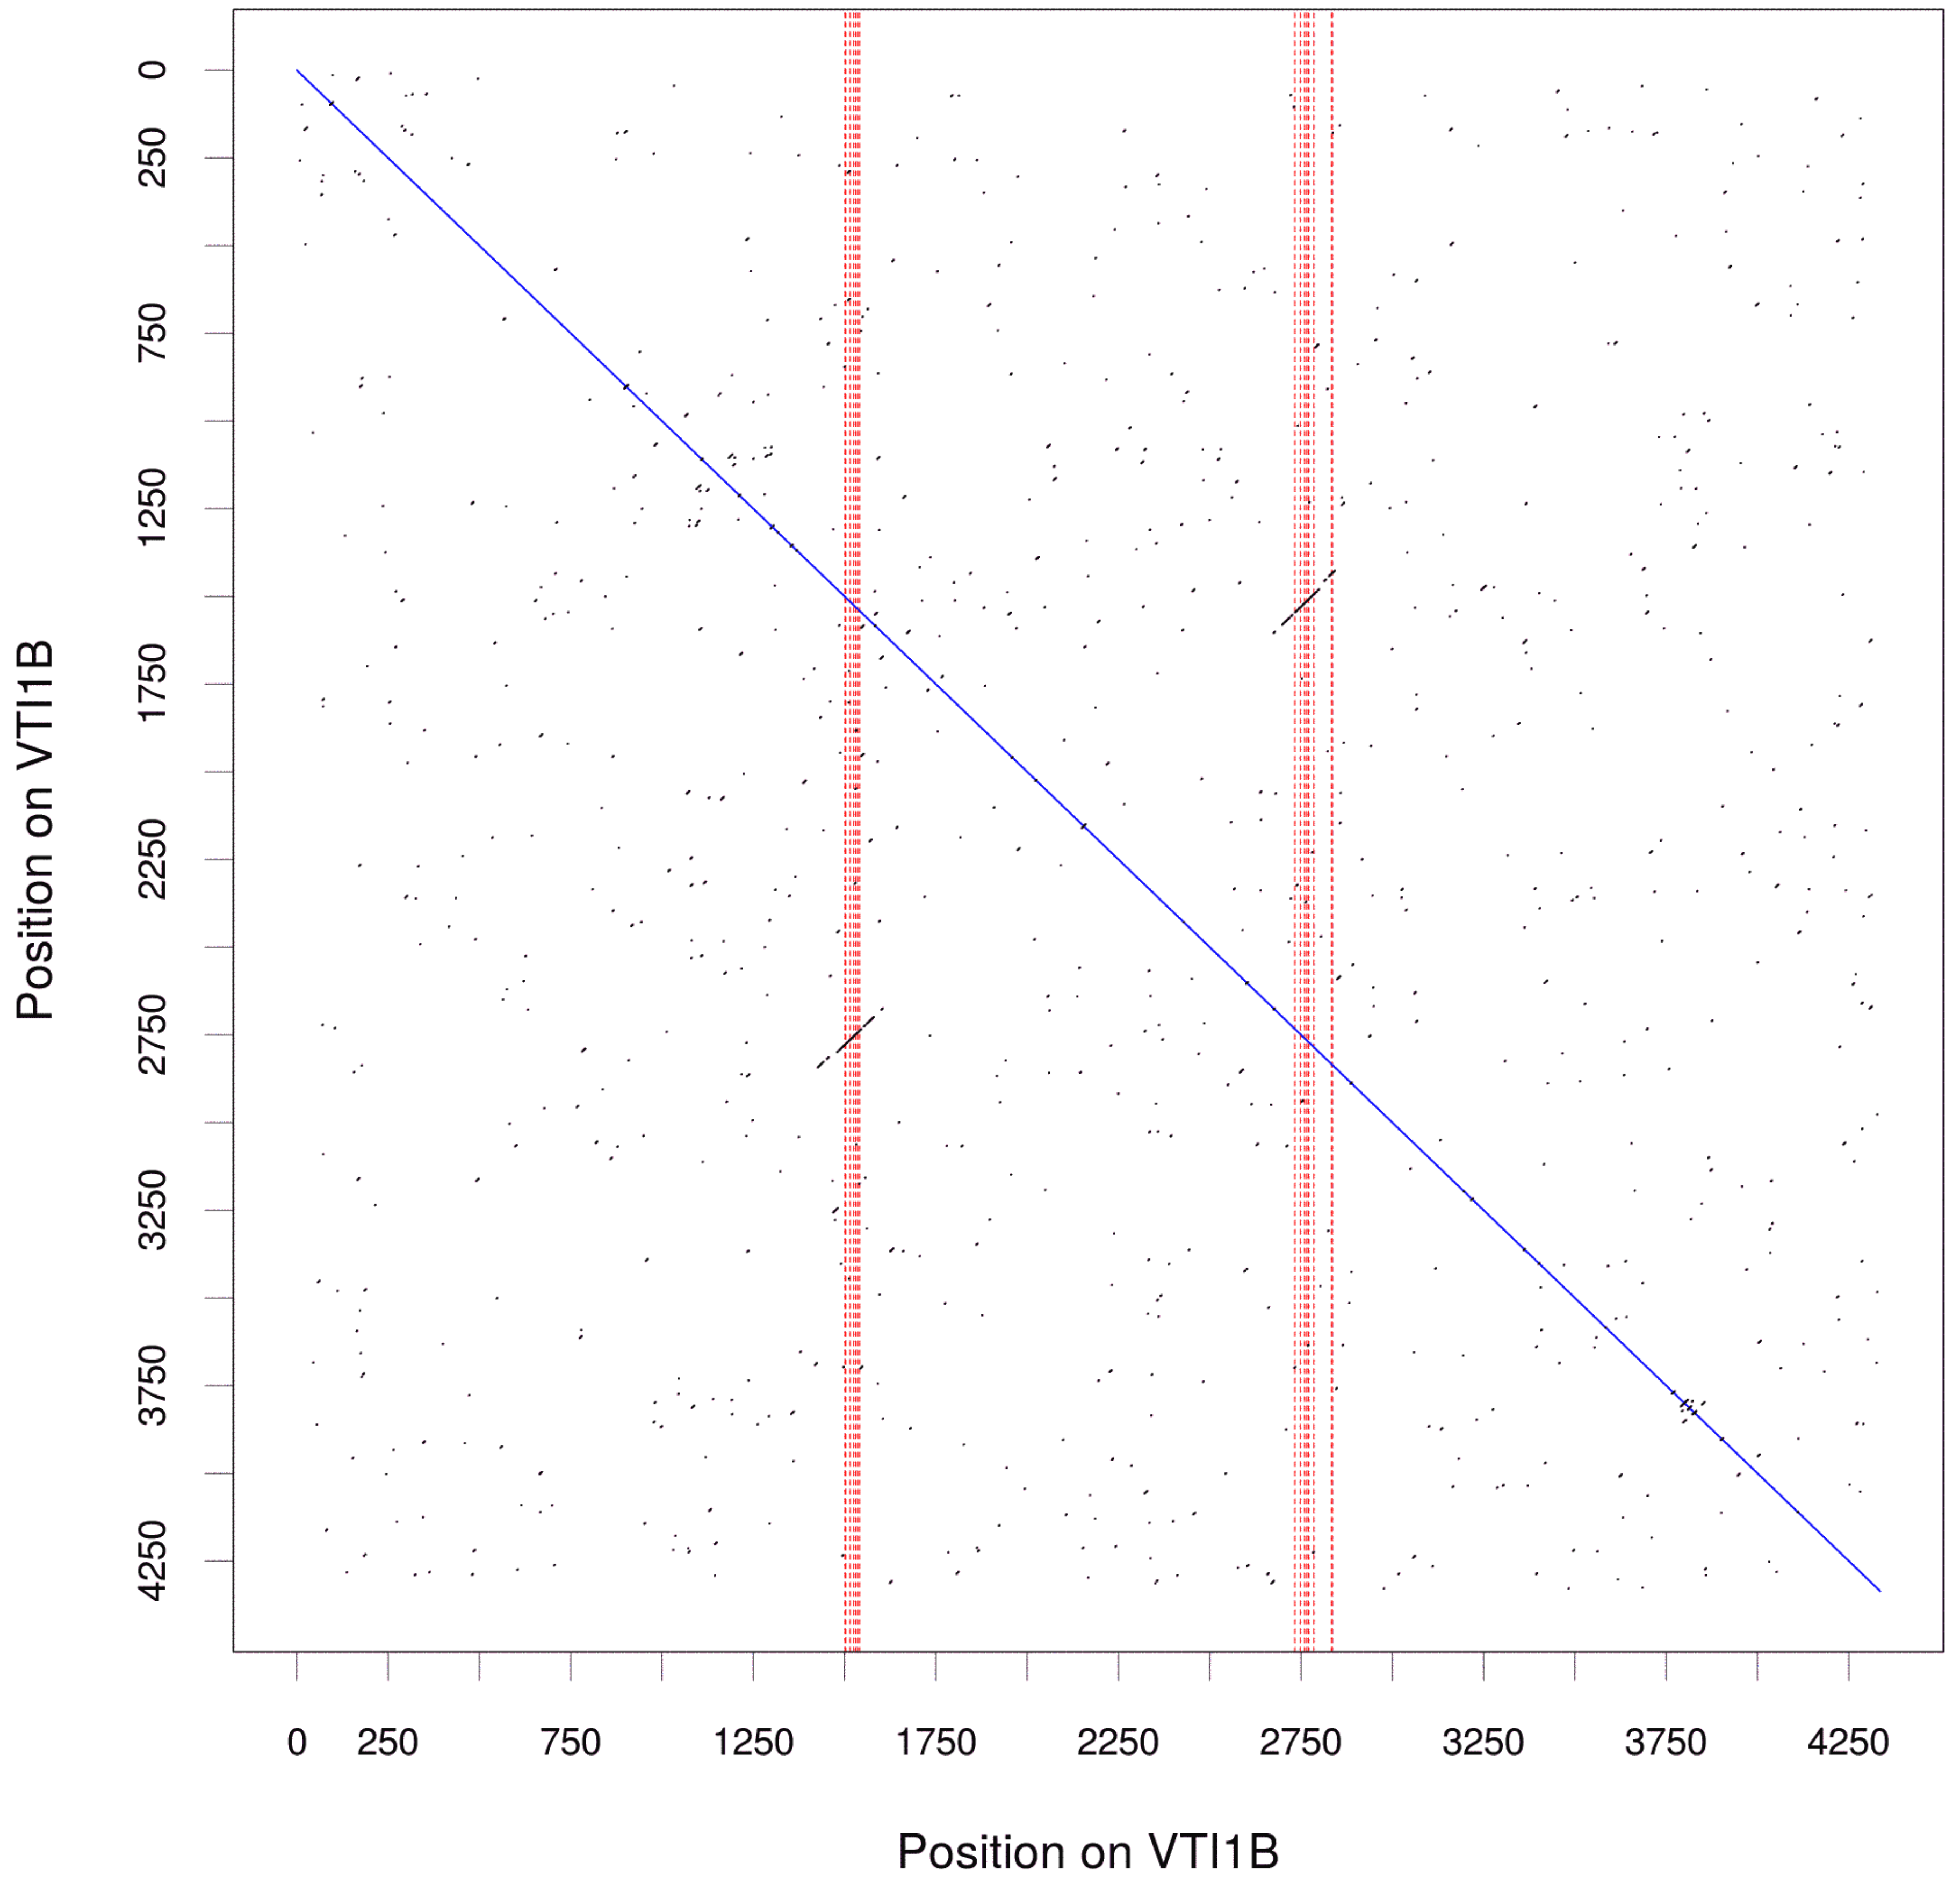

YY1

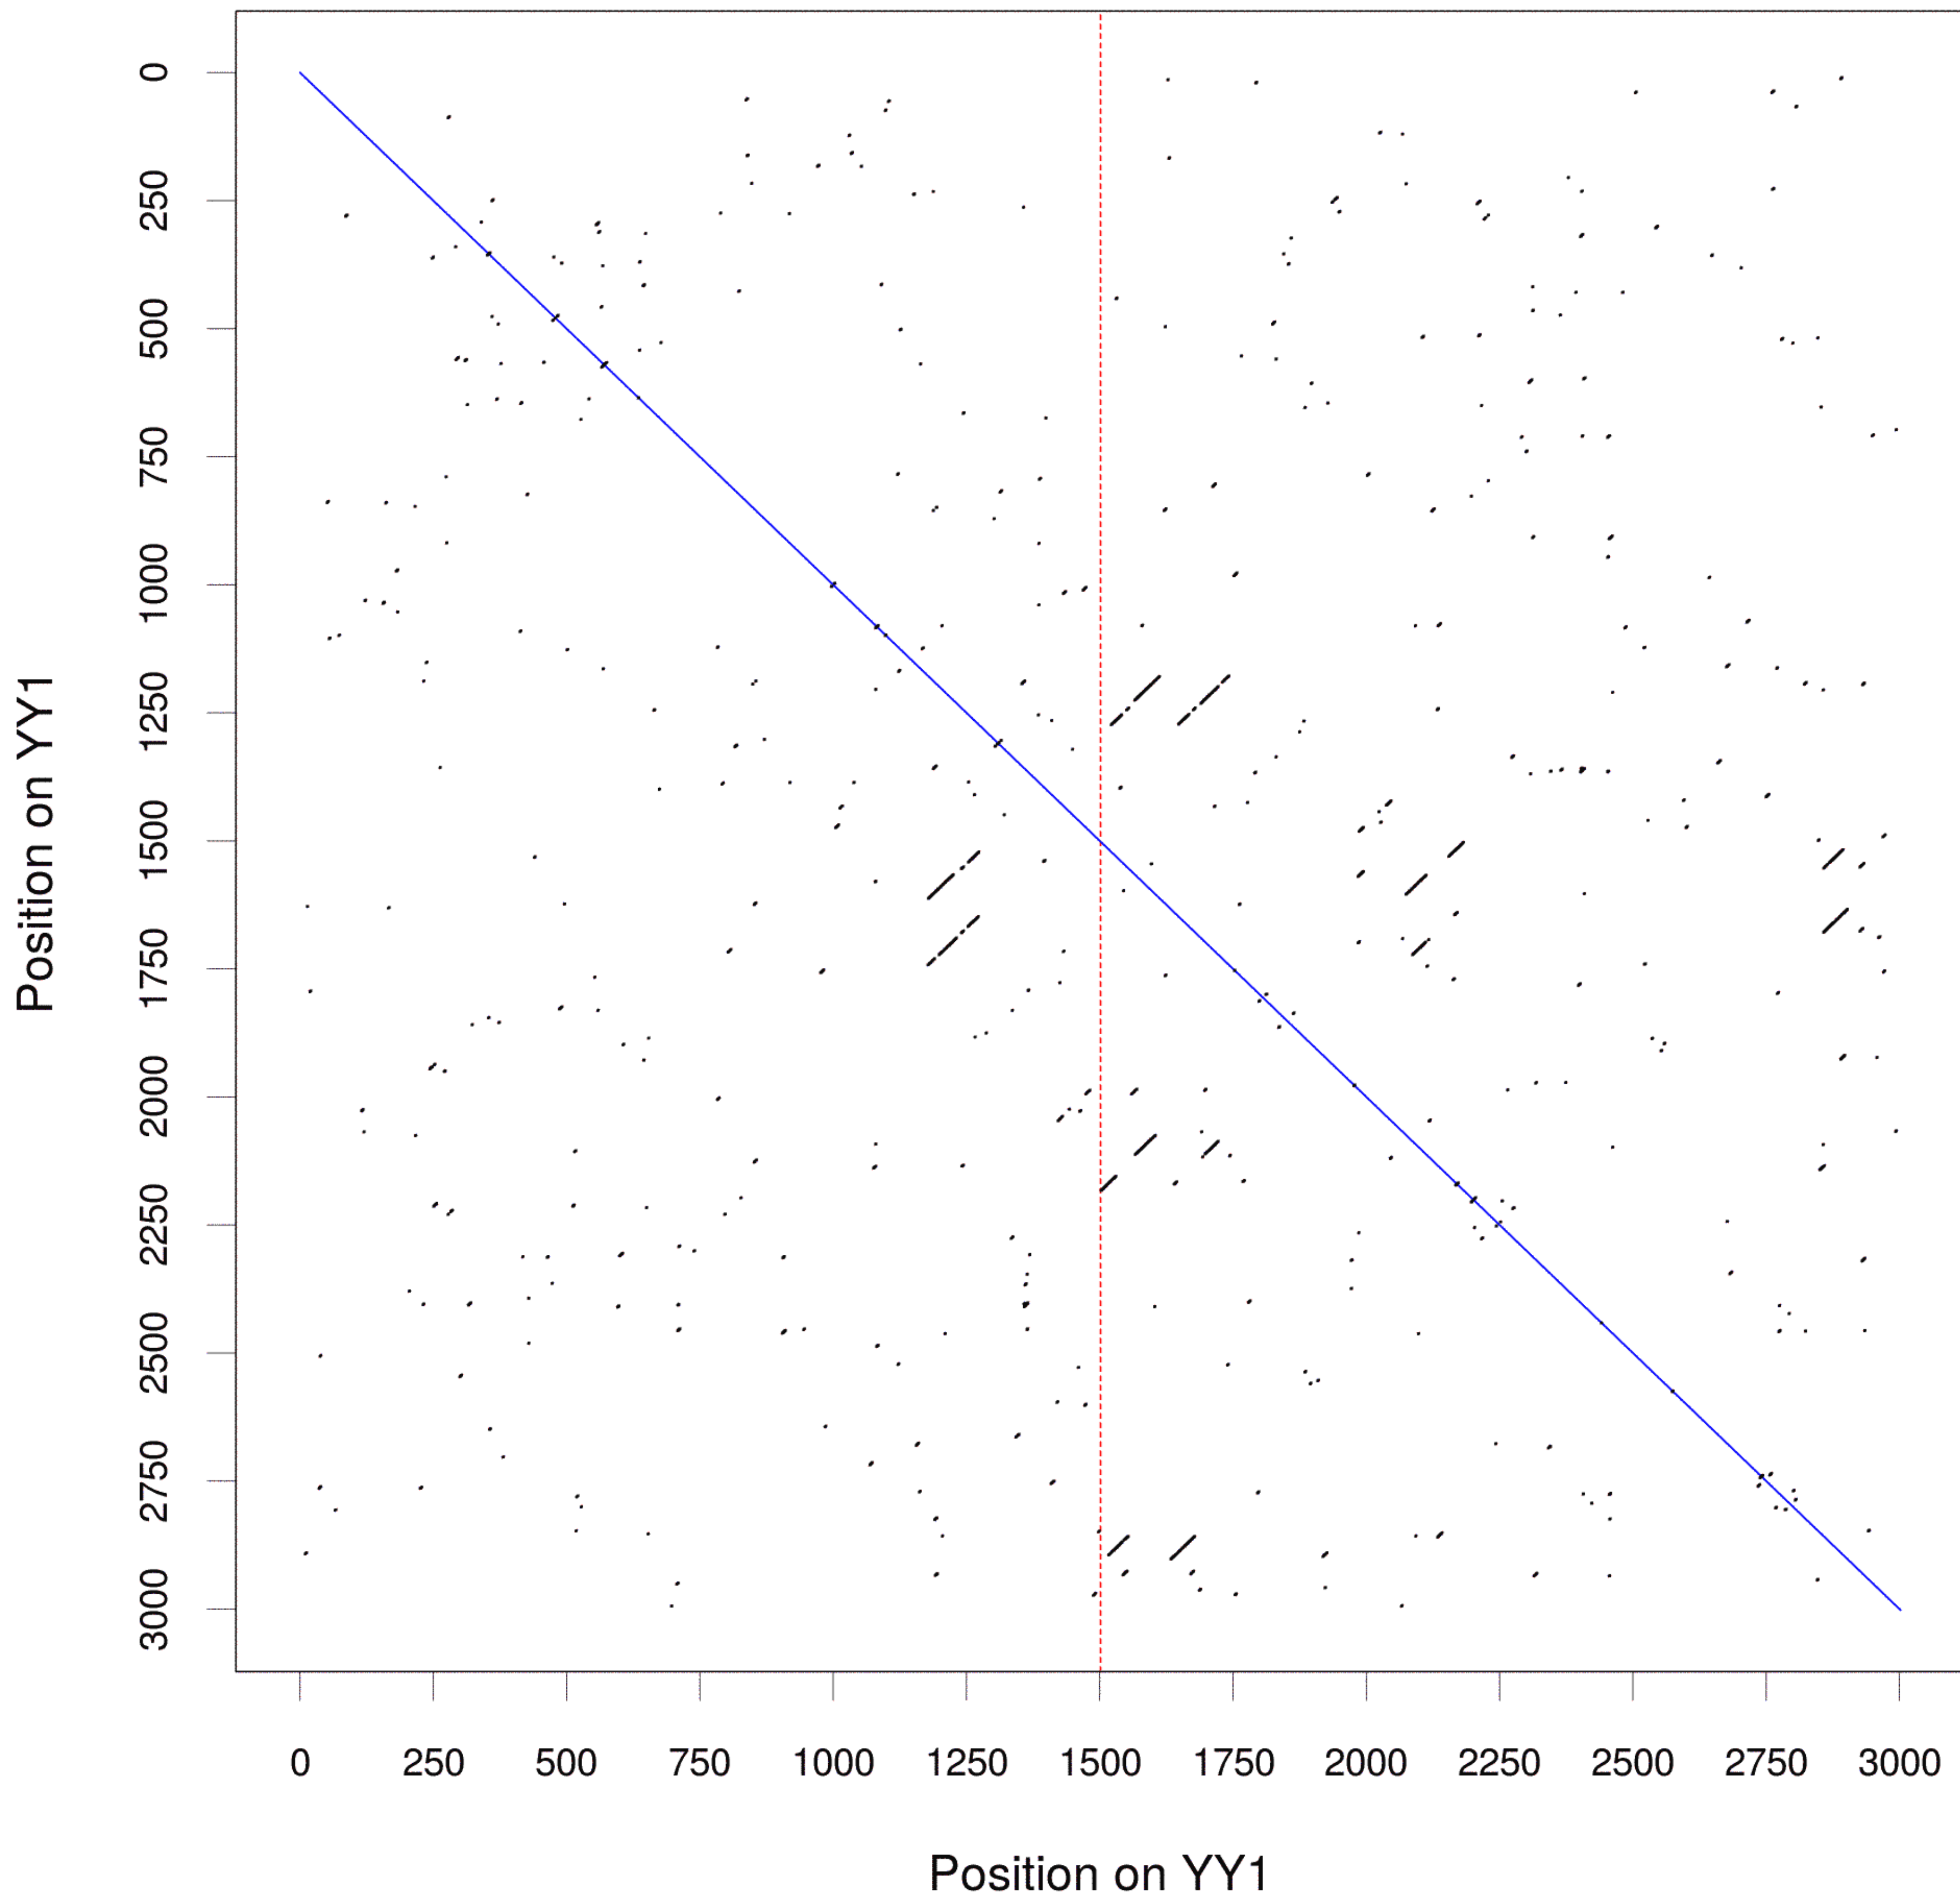

# ZFP64

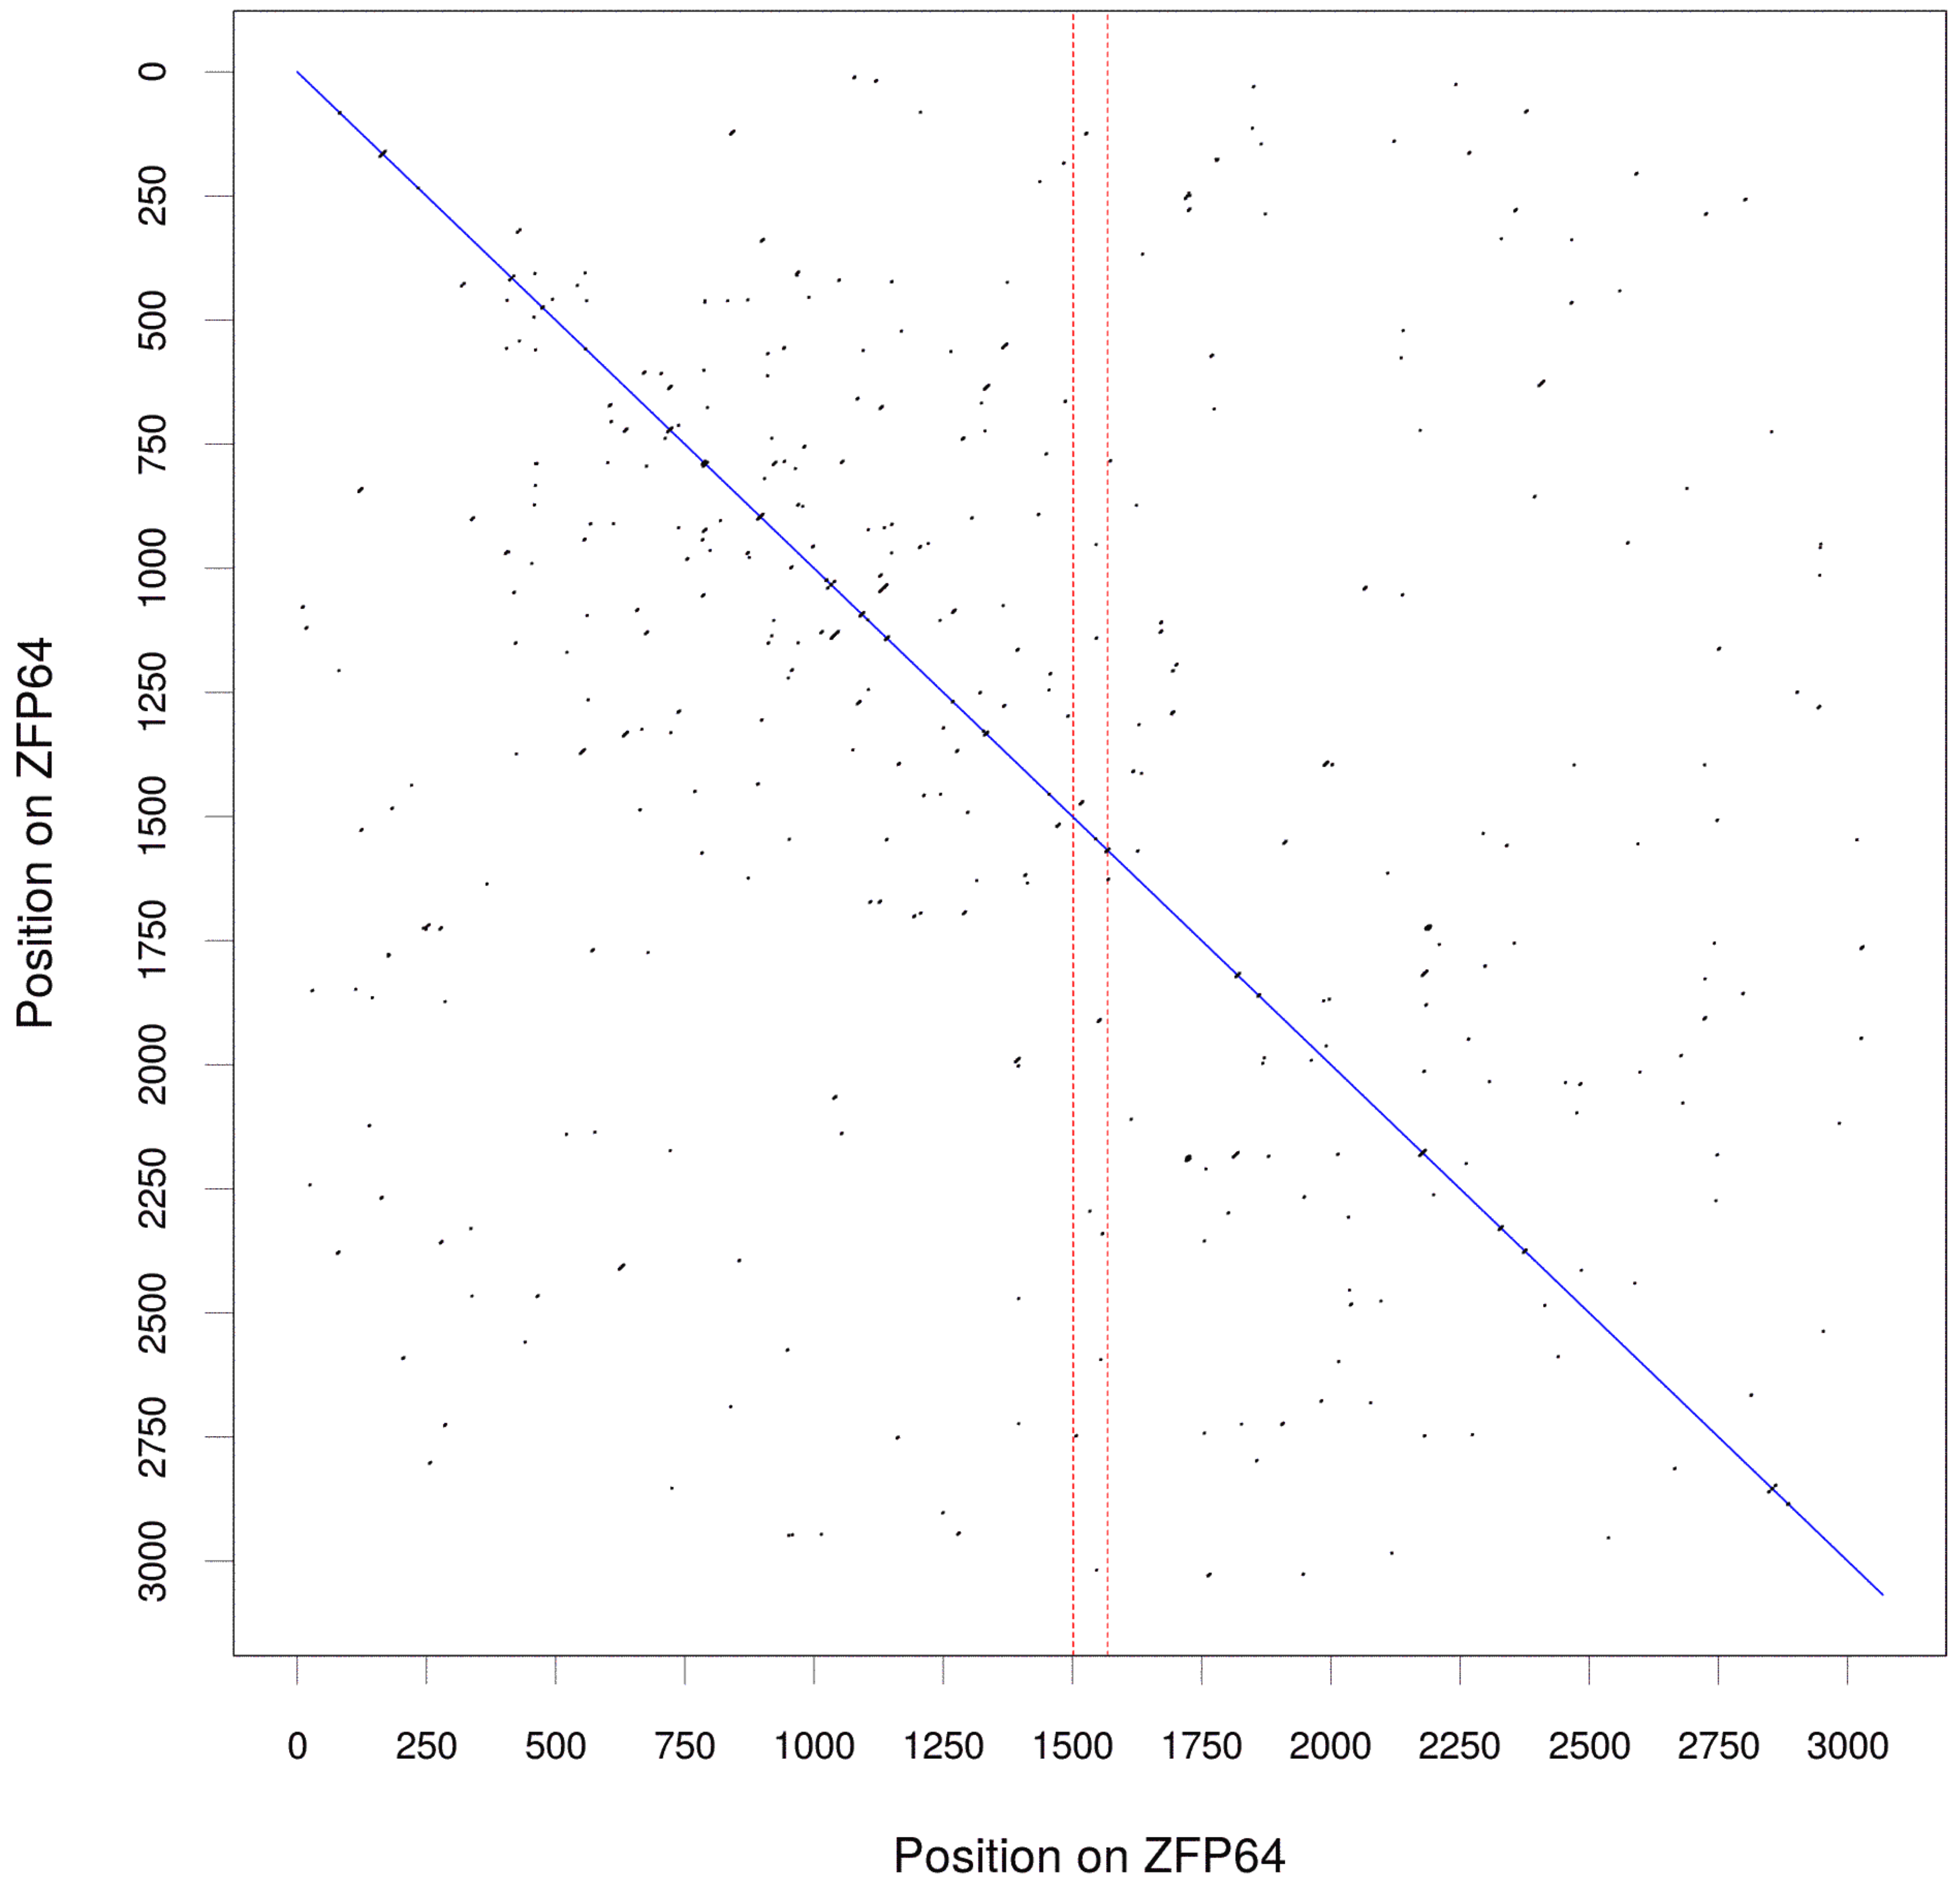

# ZMYM2

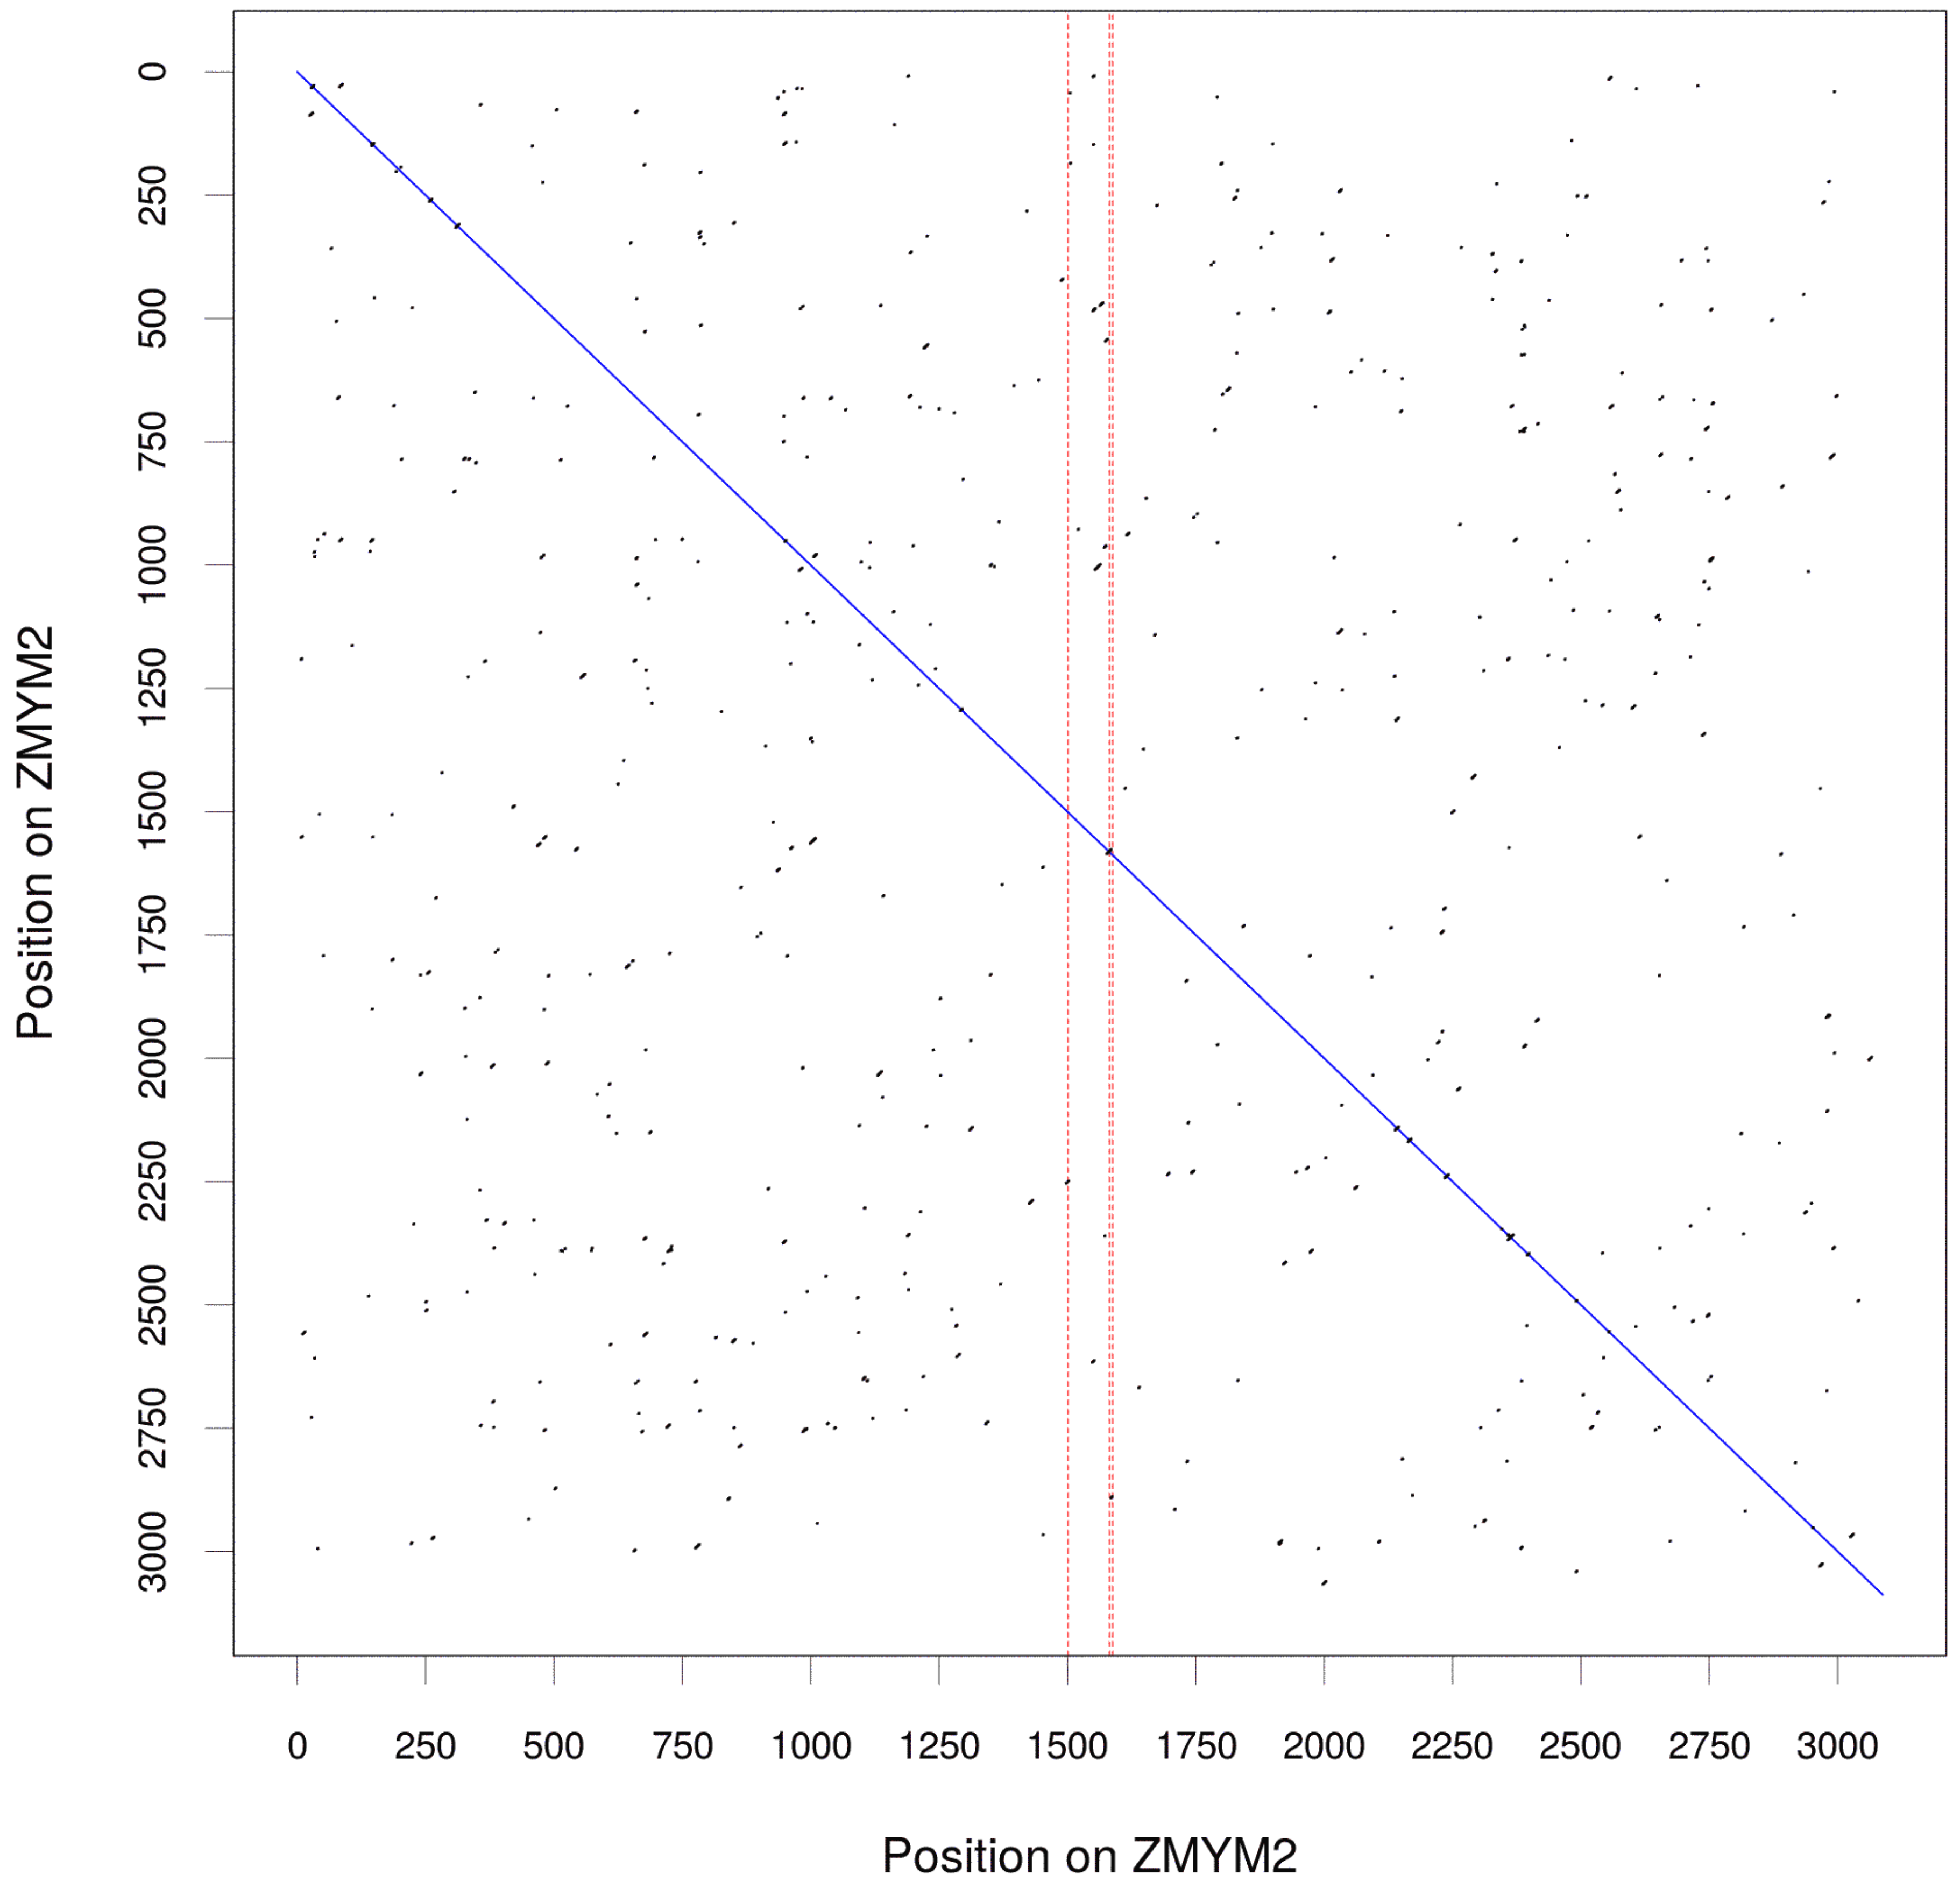

# ZMYM5

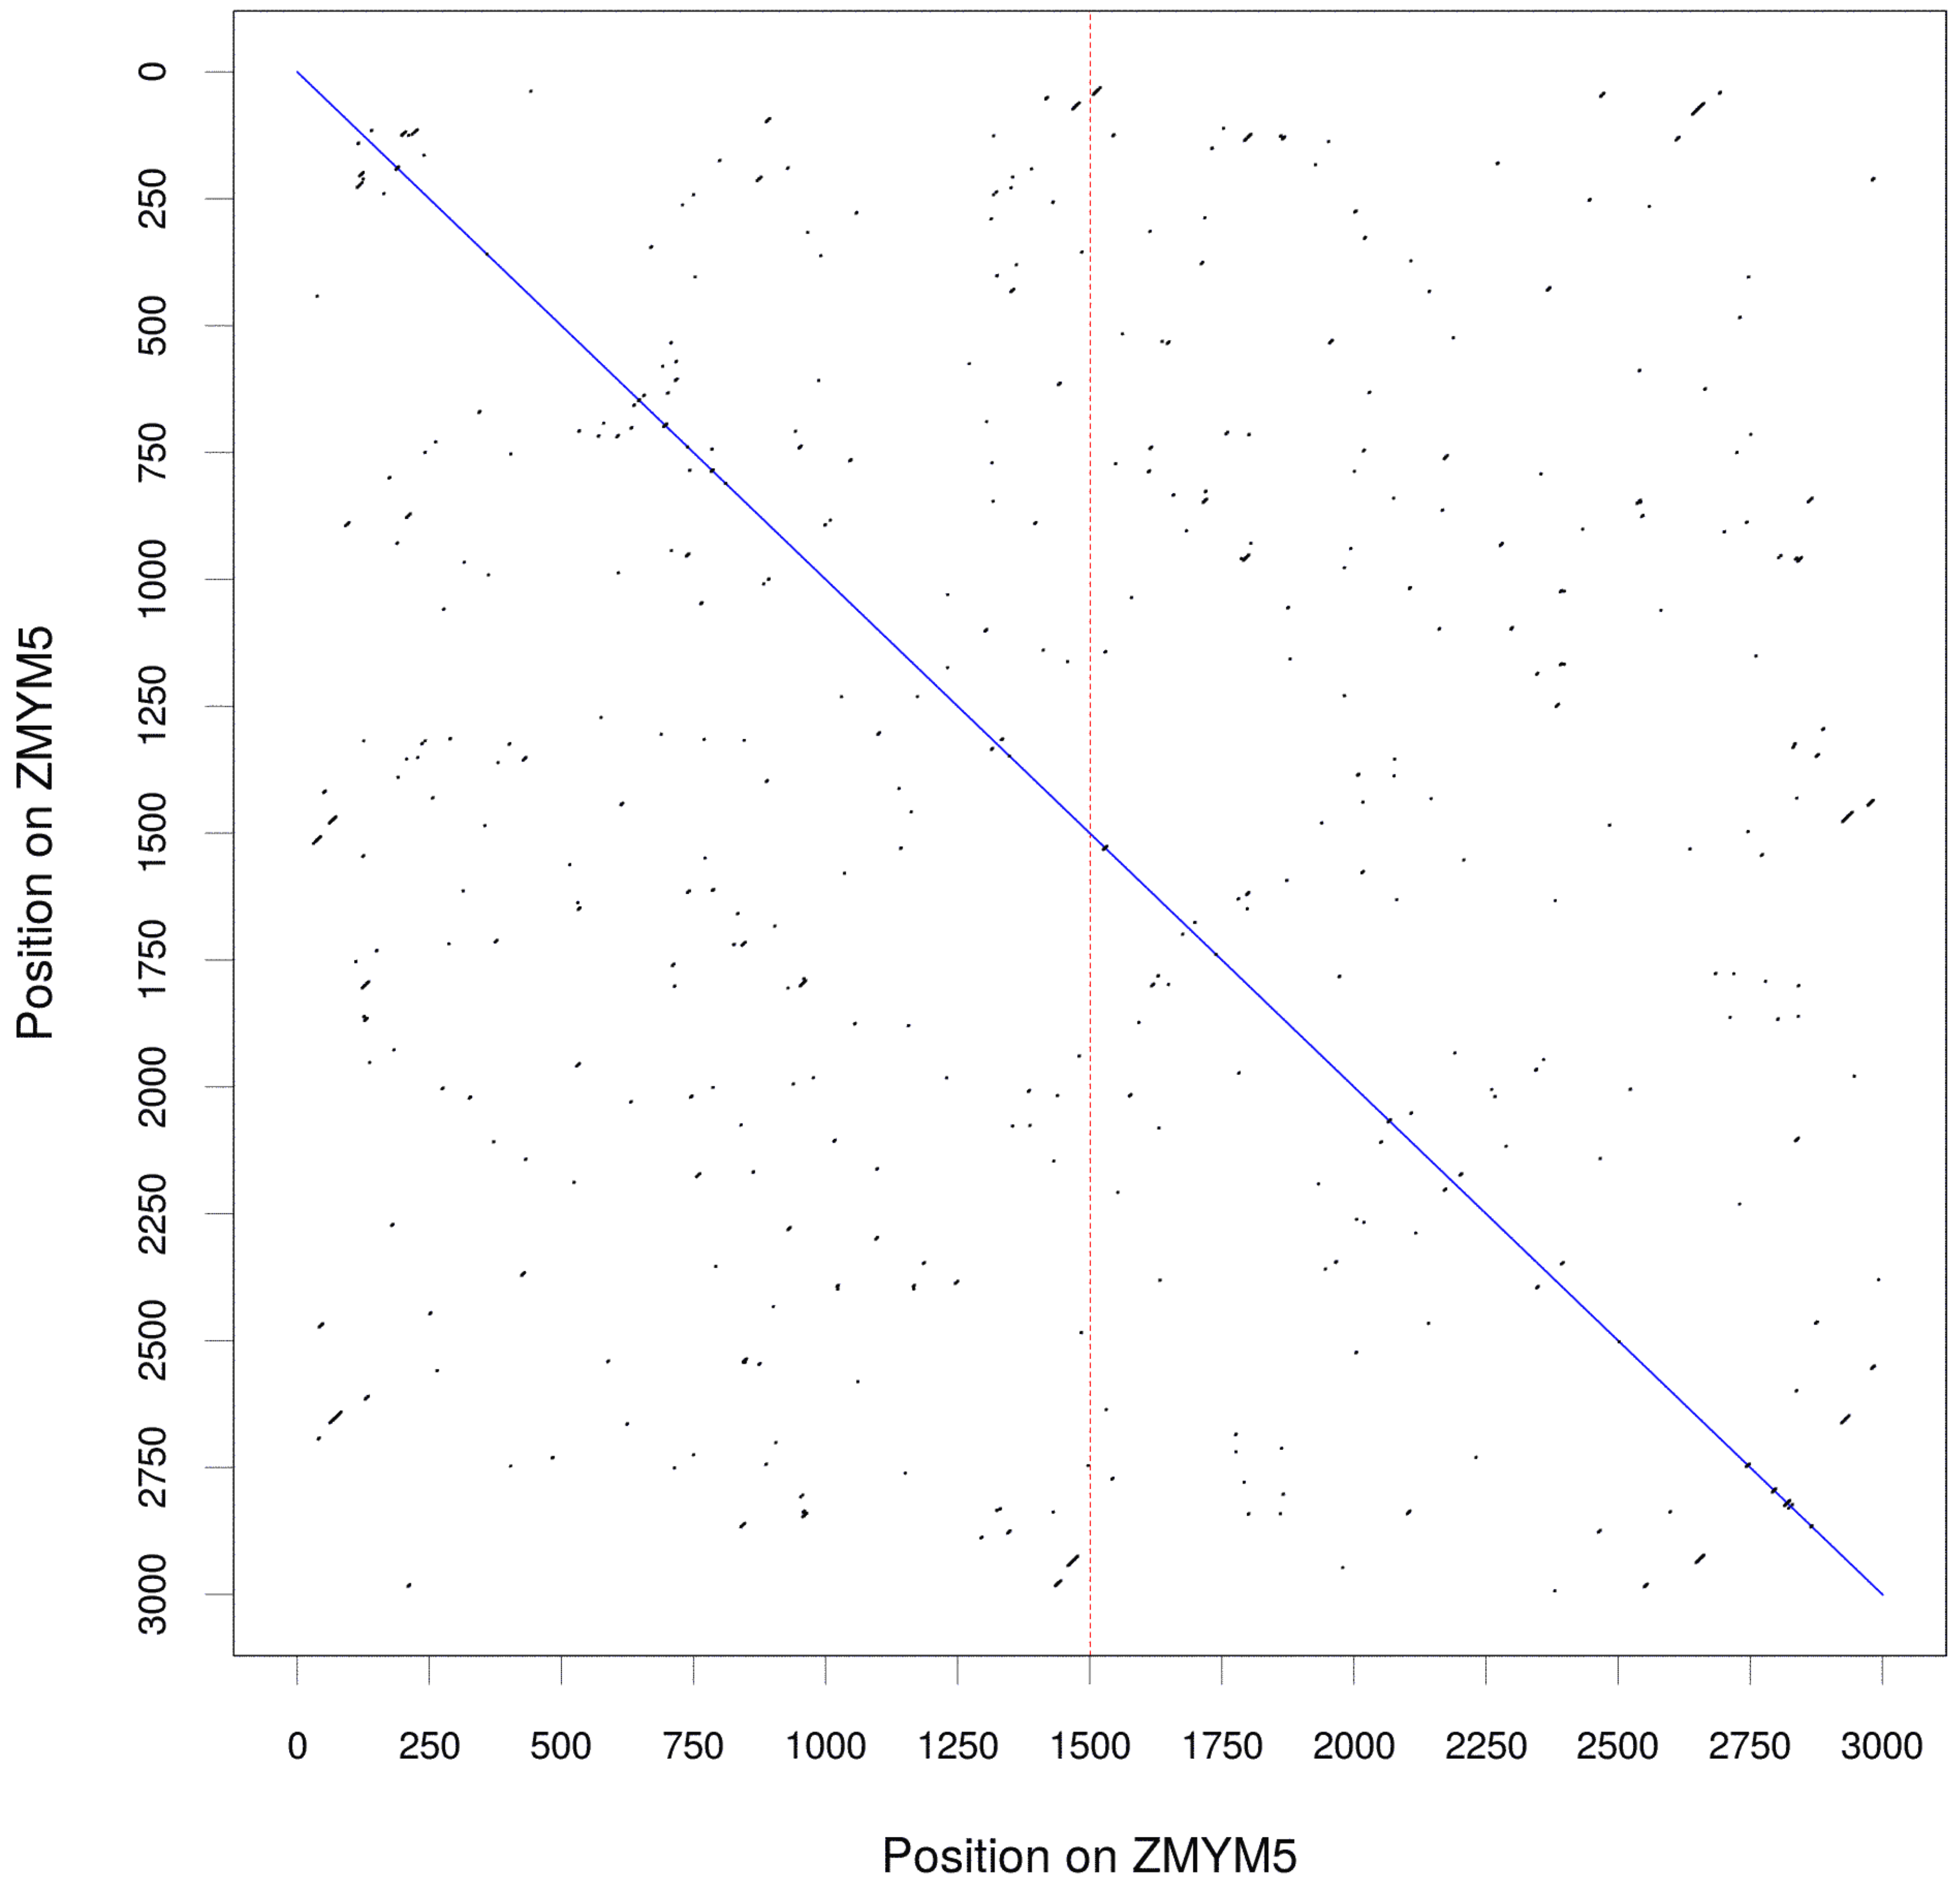

# ZNF212

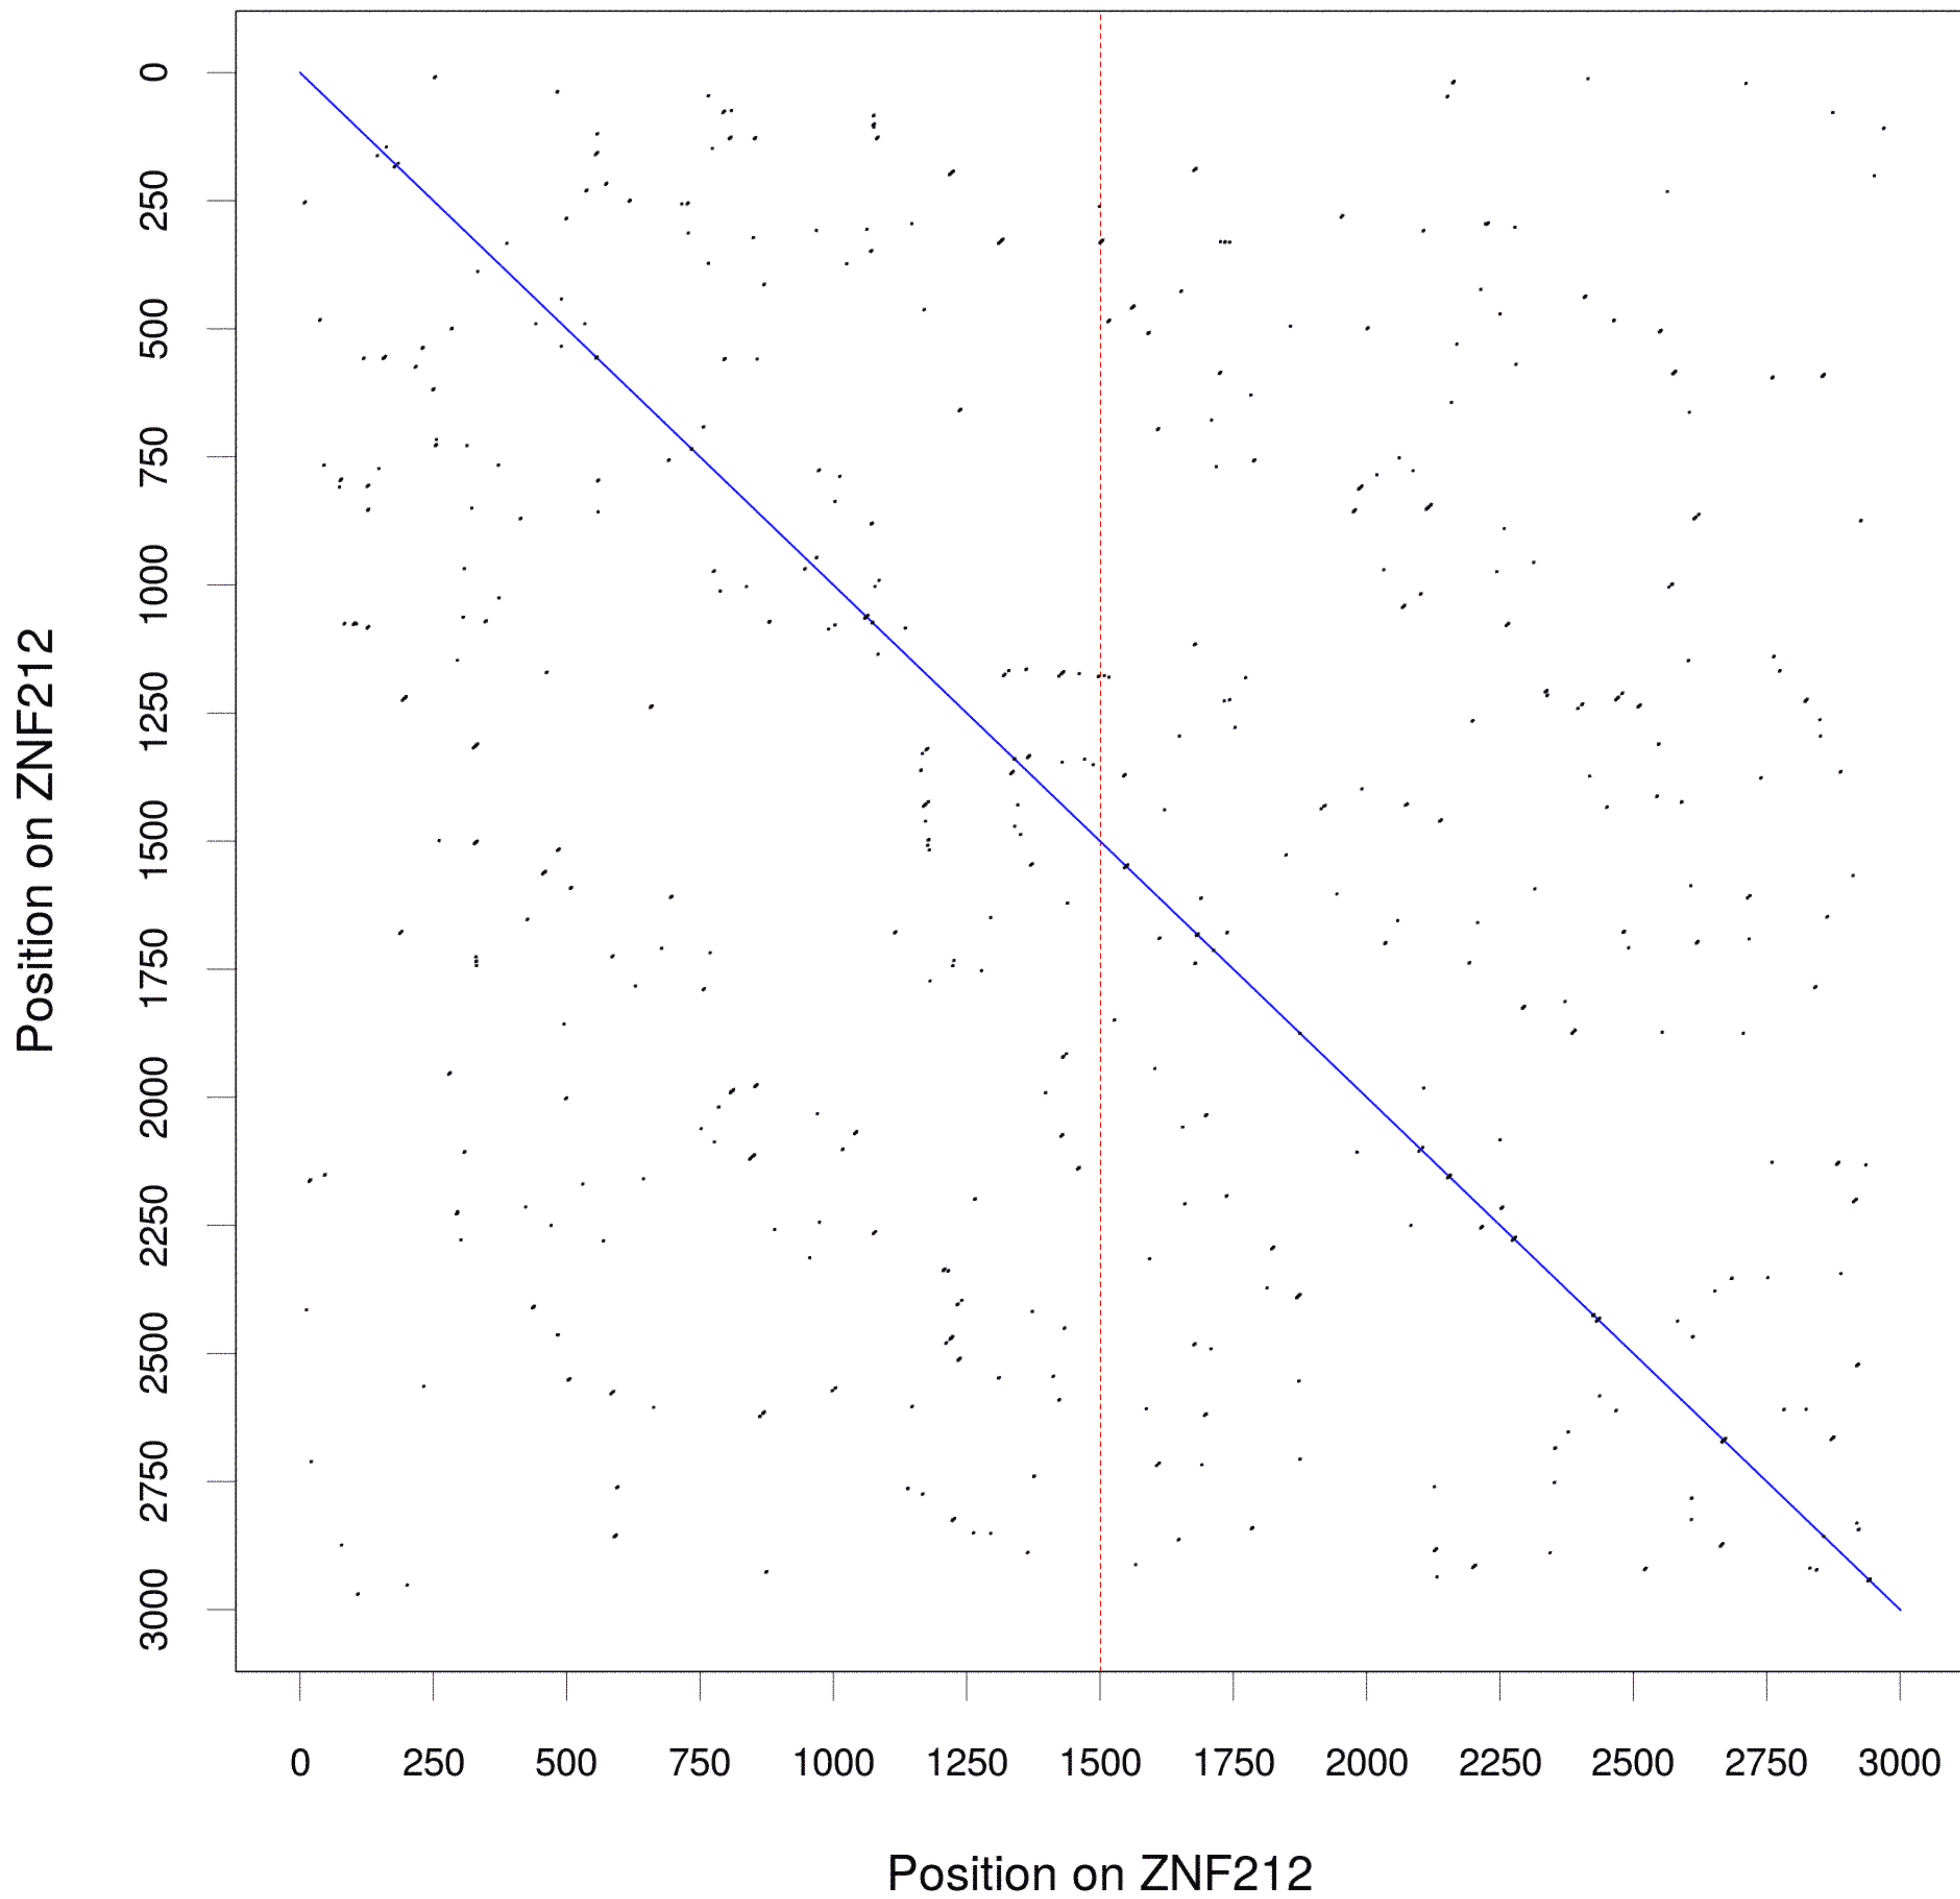

# ZNF384

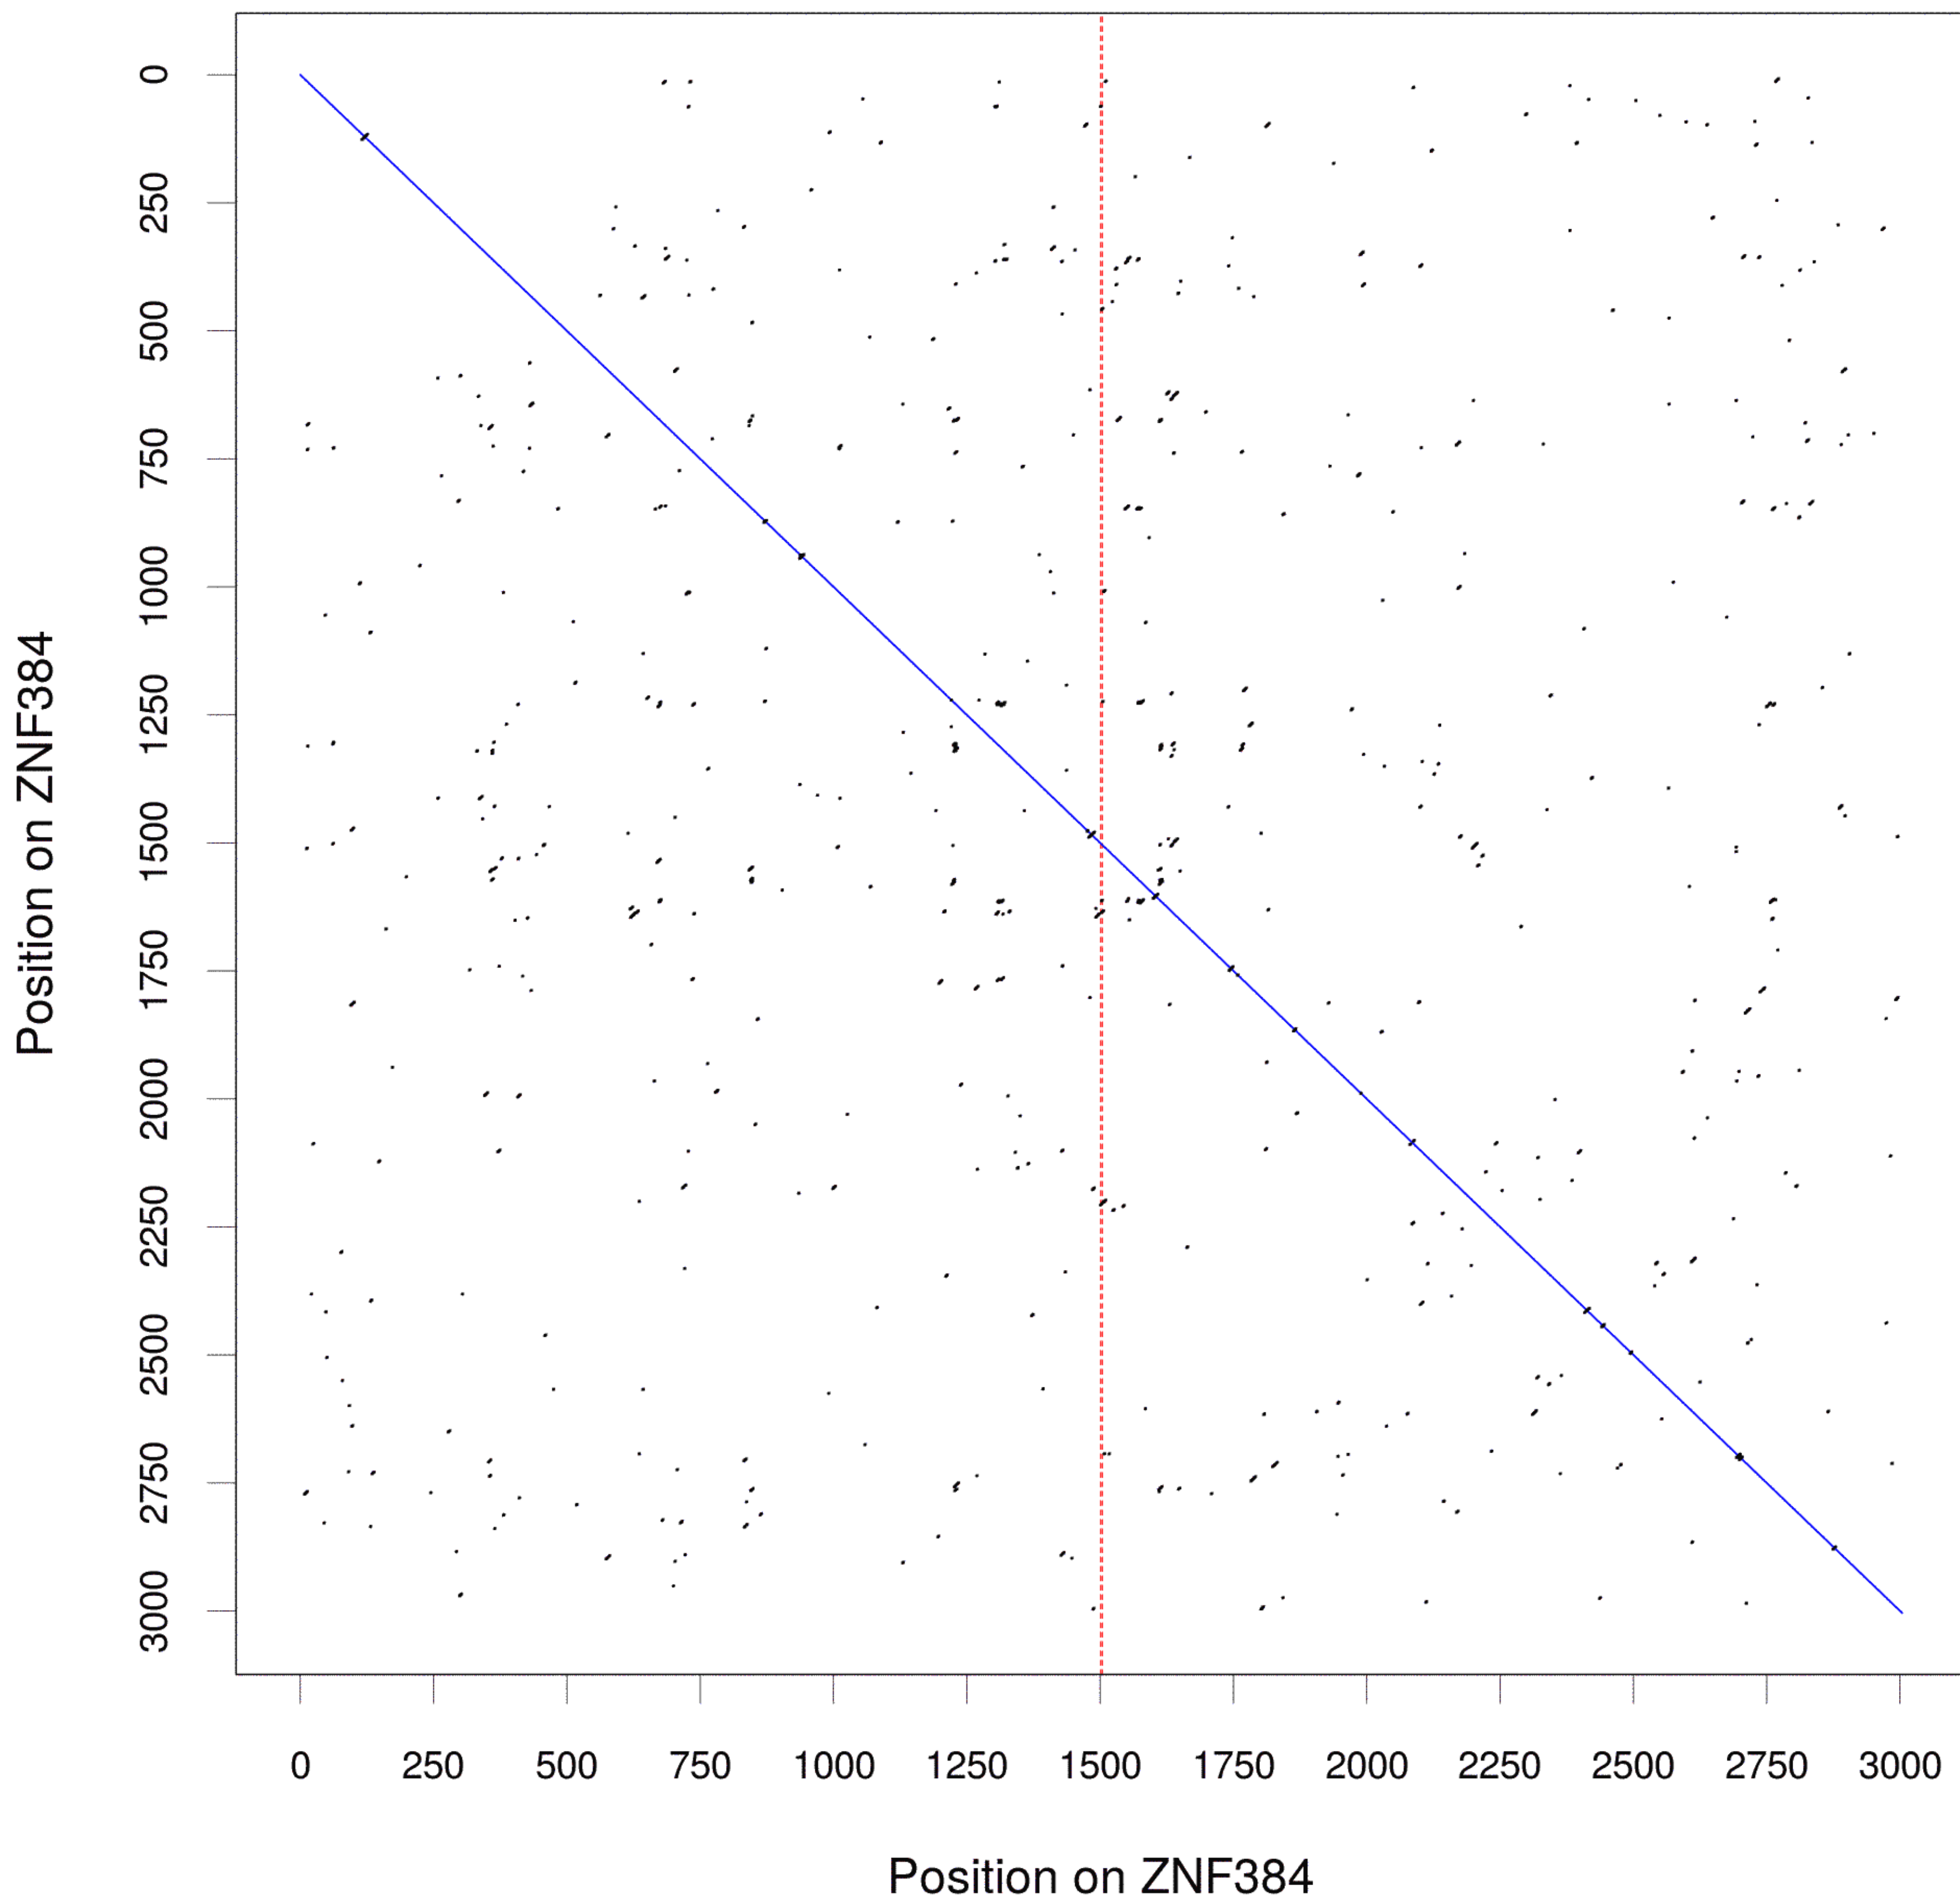

# ZNF394

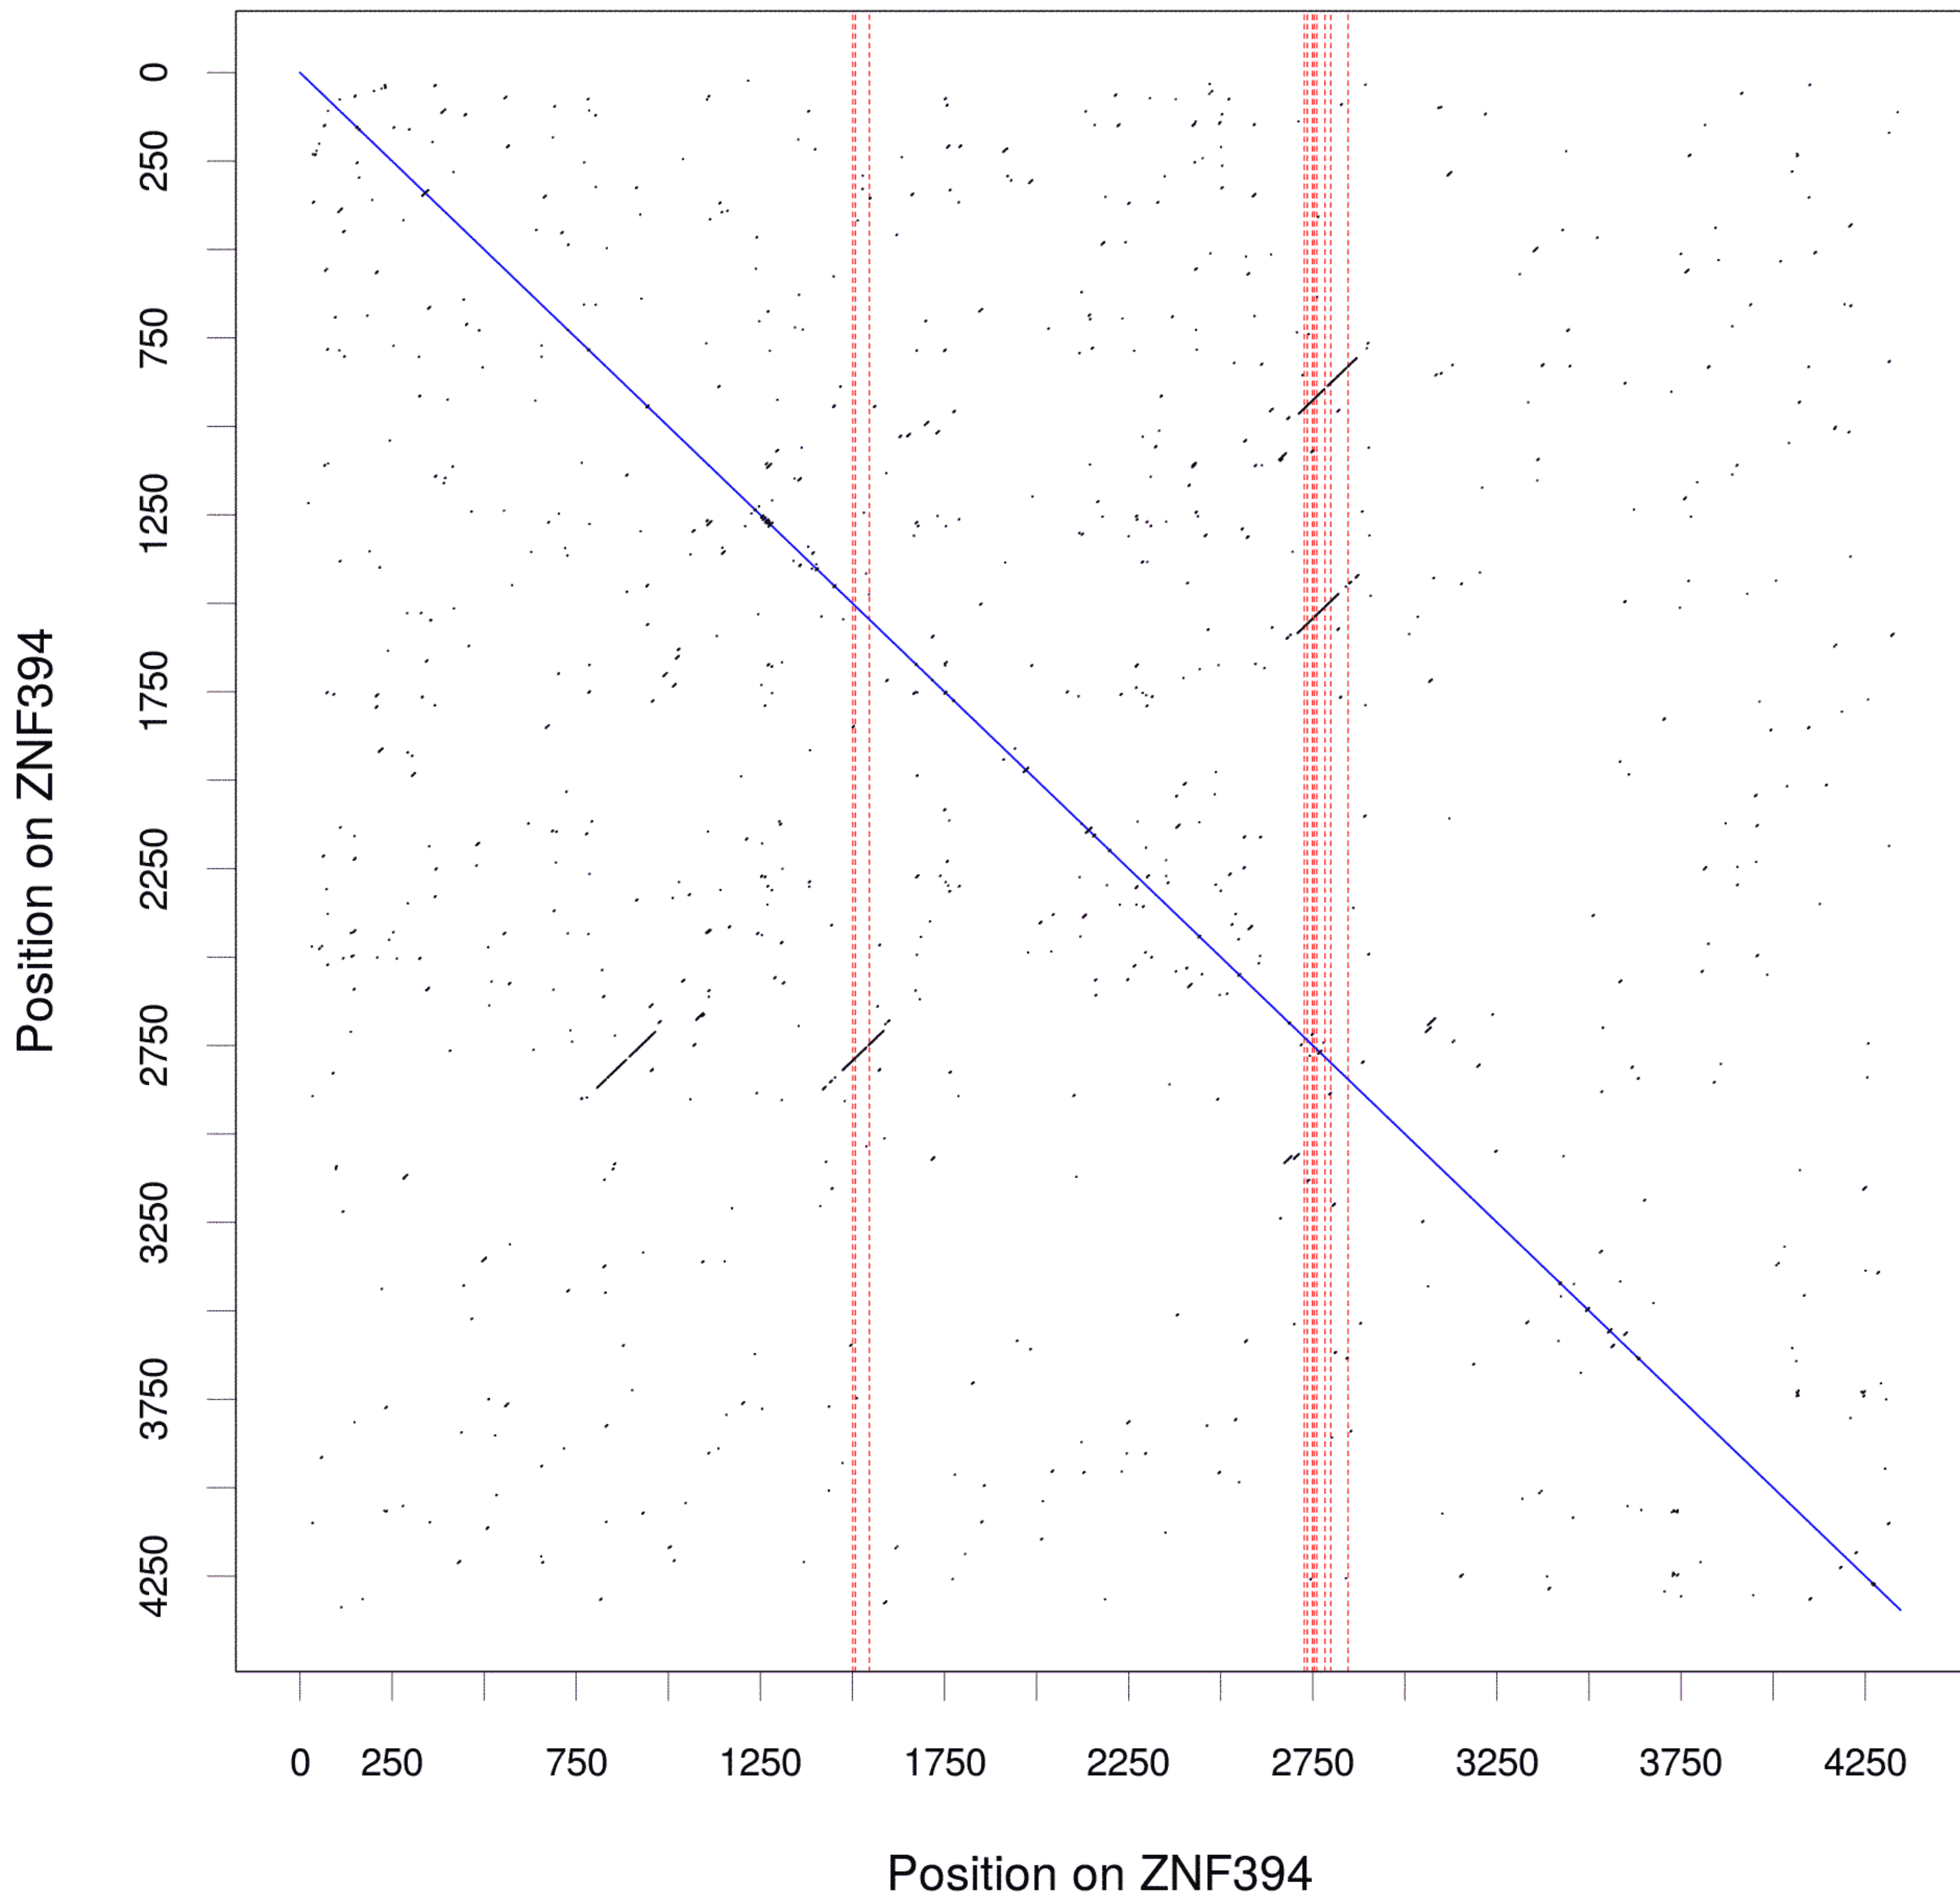



# ZNF783

Position on ZNF783

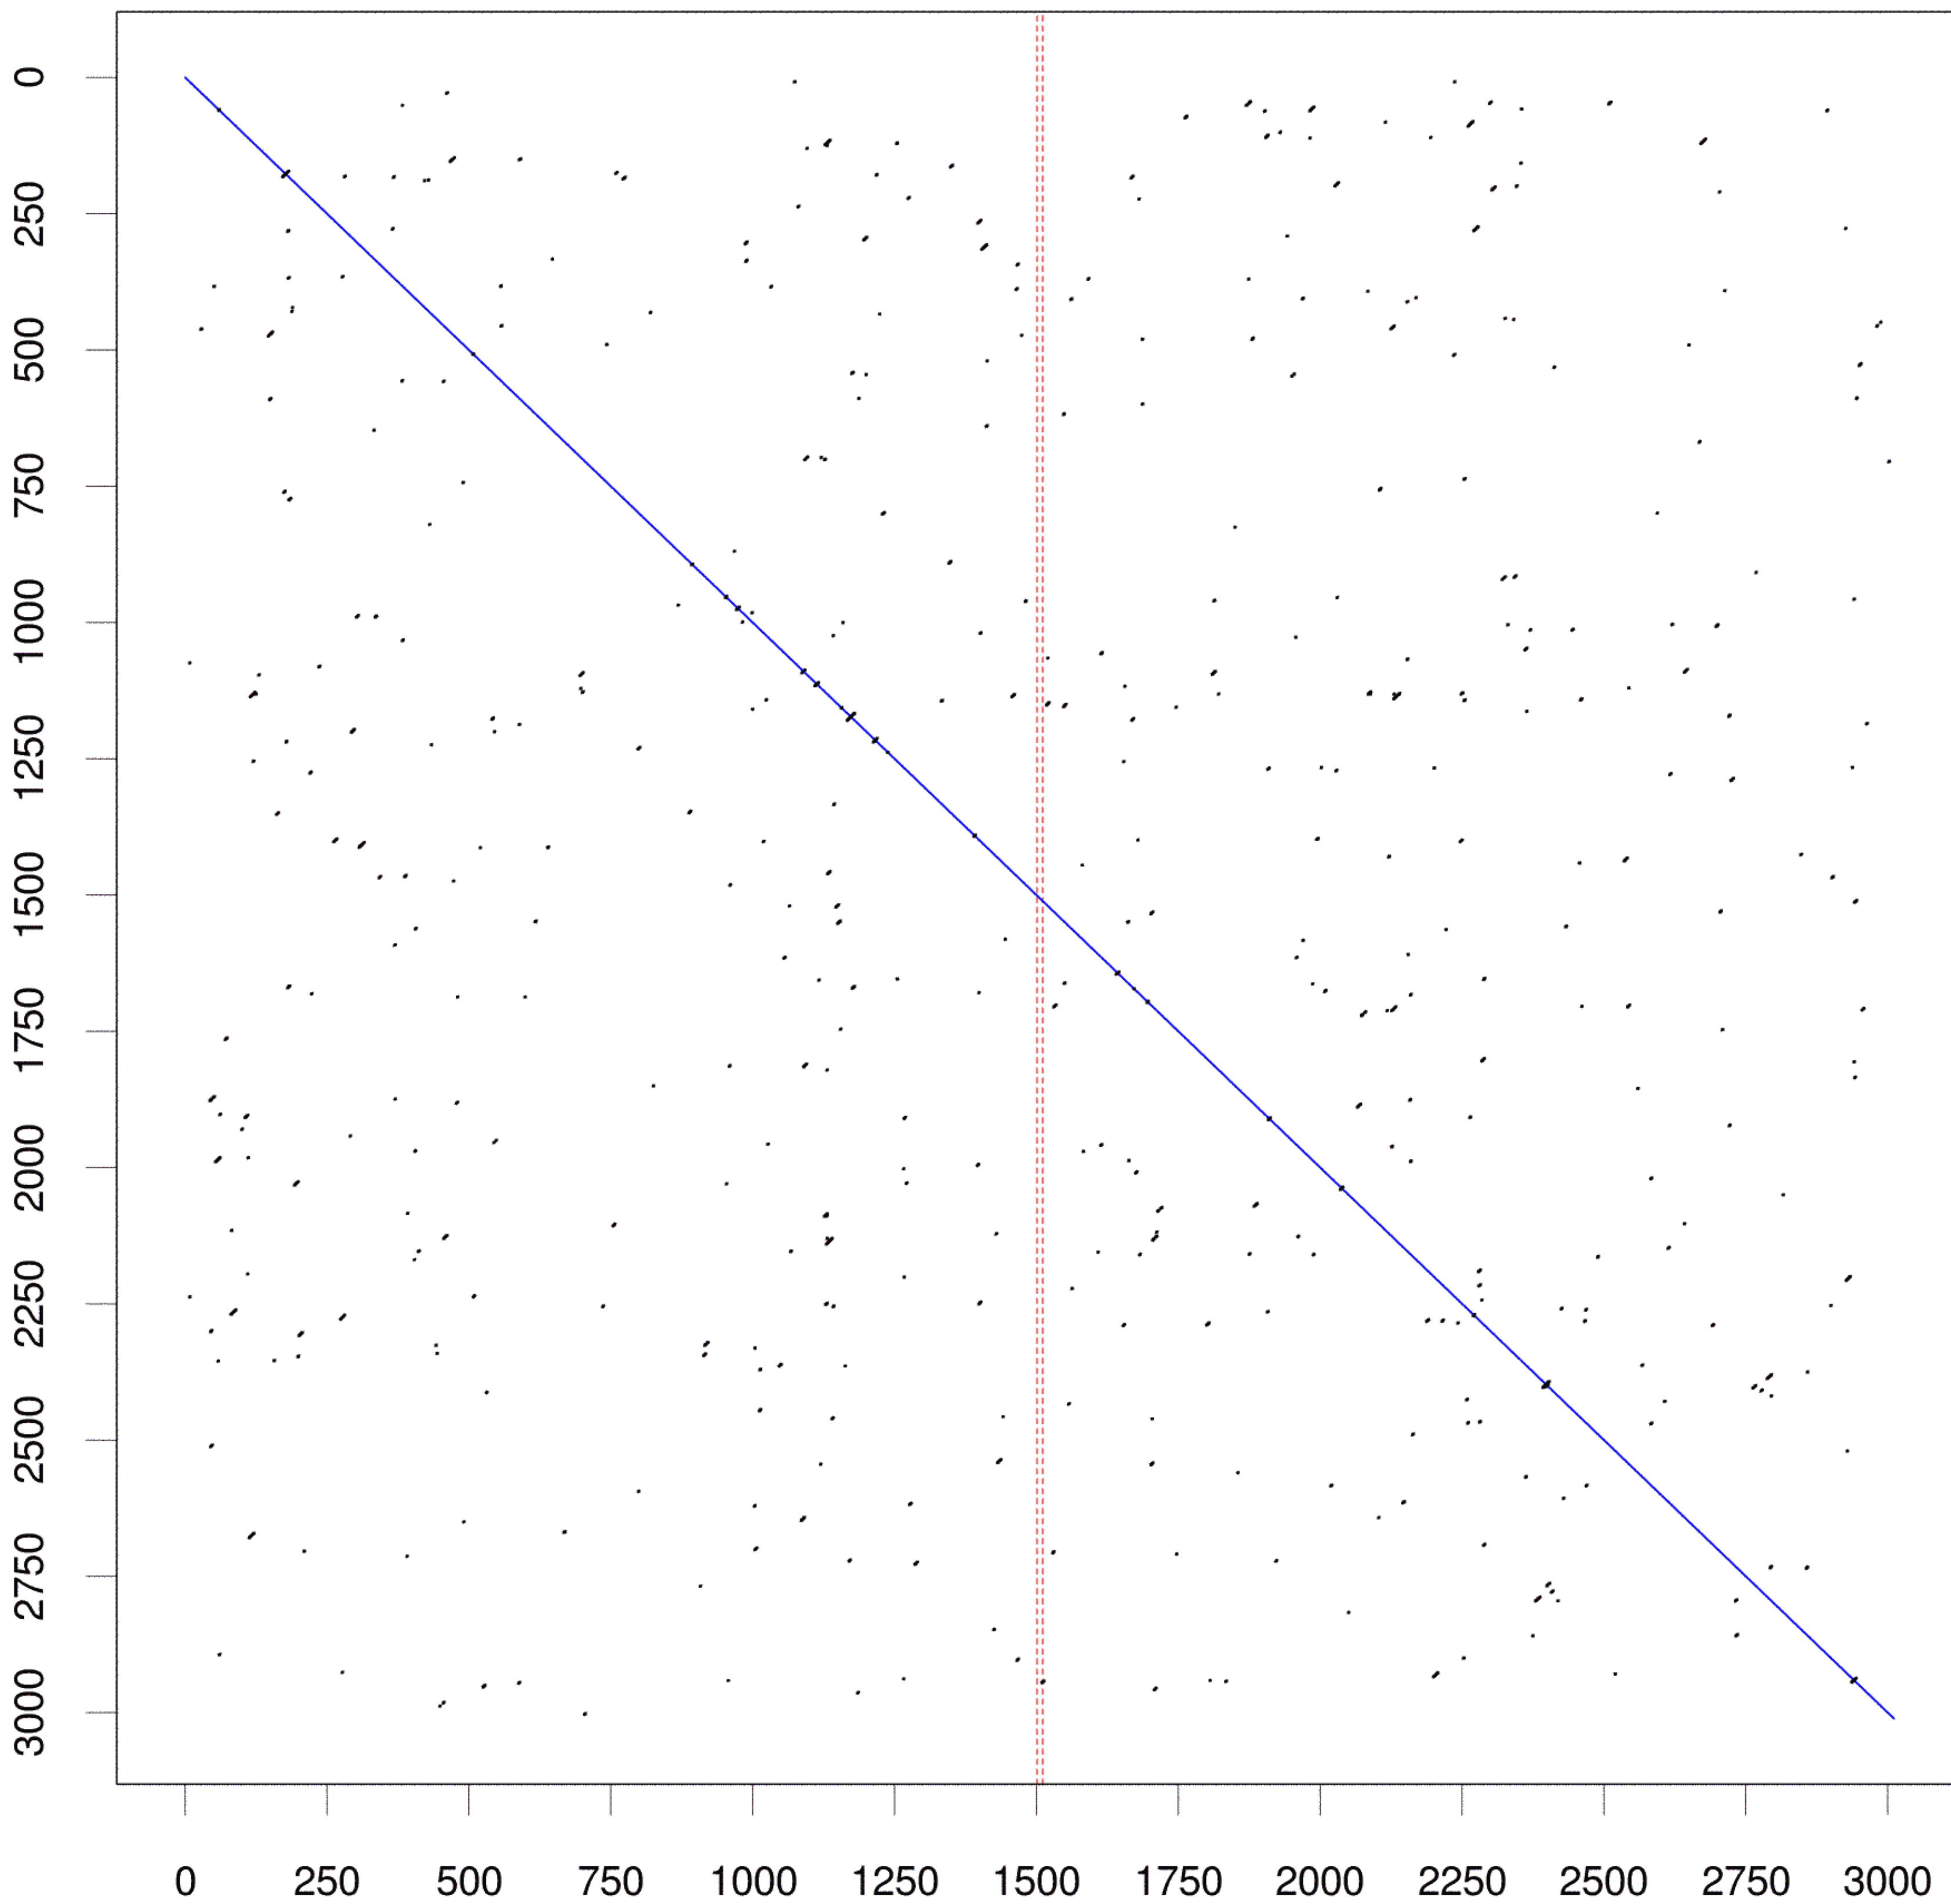

Position on ZNF783

# ZNHIT3

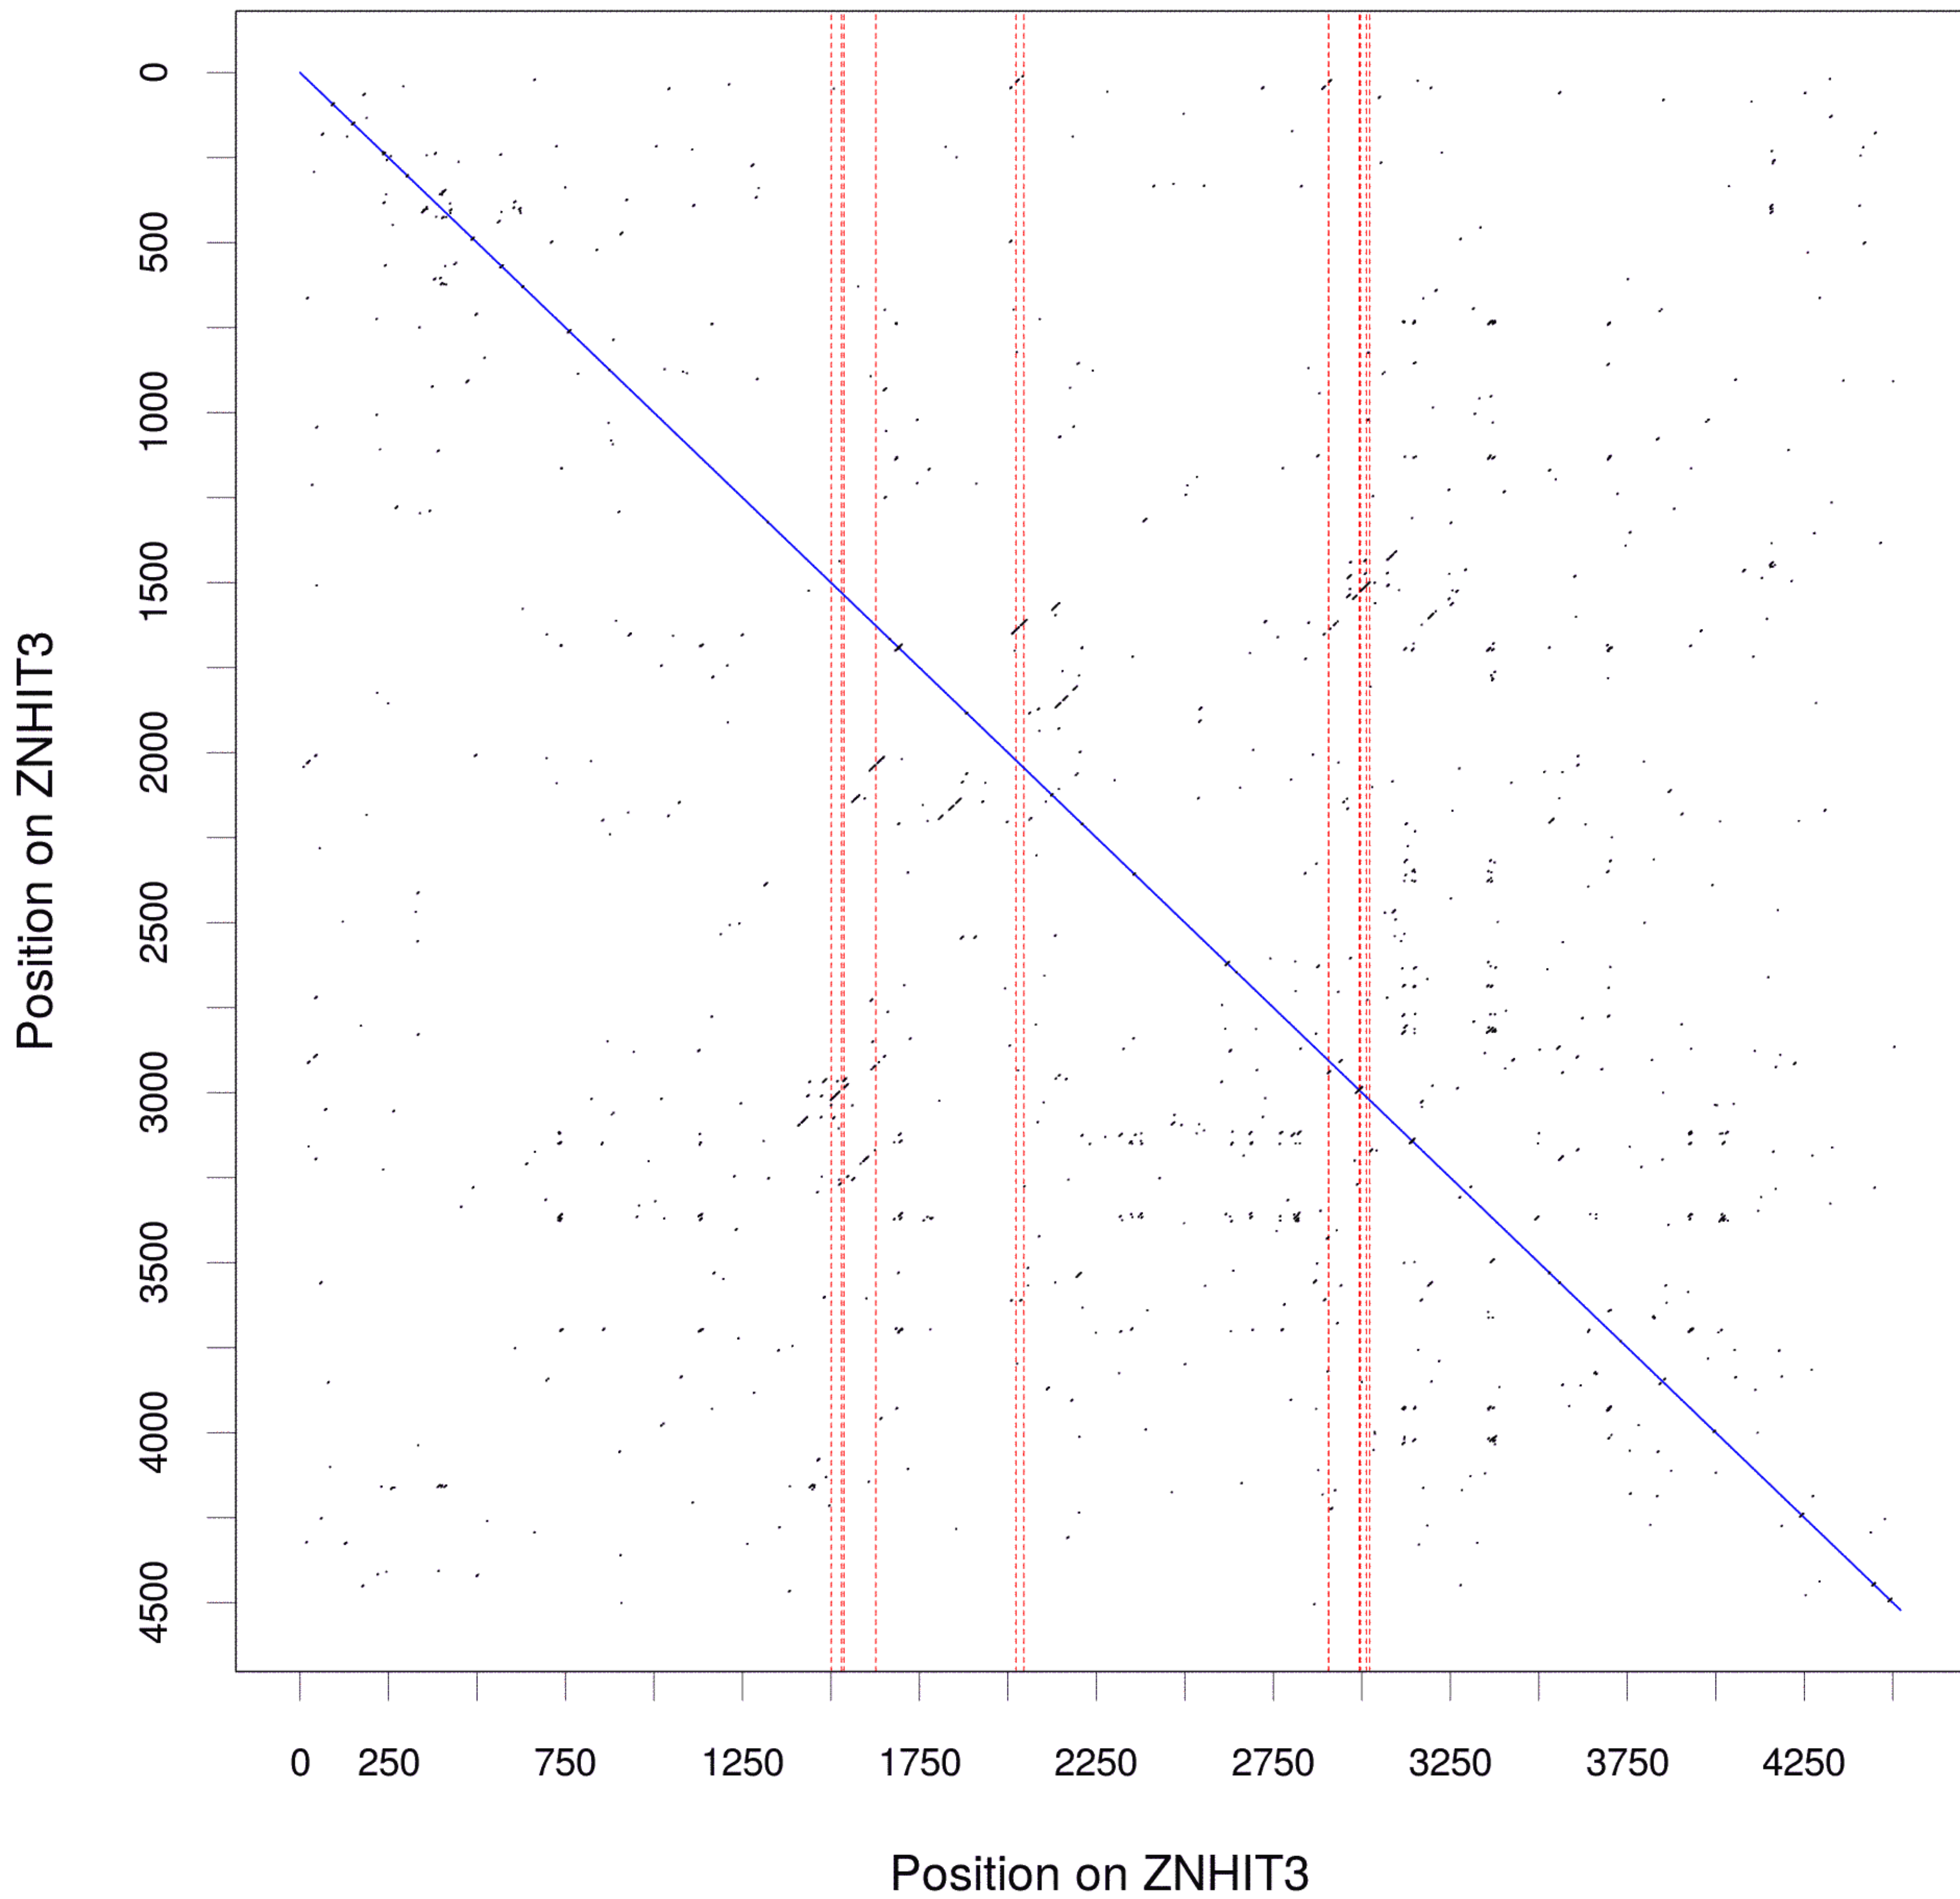

Supplement: Supplementary file [file 304220-4.pdf]
